# Supplementary material for: A GPX4-dependent cancer cell state underlies the clear-cell morphology and confers sensitivity to ferroptosis
Source: PubMed Central journal article supplement (PMC6453886; doi:10.1038/s41467-019-09277-9), 2019-04-08
Supplement: 41467_2019_9277_MOESM2_ESM.pdf [file 41467_2019_9277_MOESM2_ESM.pdf]

**Editorial Note:** This manuscript has been previously reviewed at another journal that is not operating a transparent peer review scheme. This document only contains reviewer comments and rebuttal letters for versions considered at *Nature Communications*.

REVIEWERS' COMMENTS:

Reviewer #1 (Remarks to the Author):

The authors have responded adequately and I have no further concerns.

Reviewer #2 (Remarks to the Author):

The authors have appropriately addressed all my concerns and have discussed their findings in light of recent papers on the role of the HIF system in the context of ferroptosis. Therefore, I have no further comments.

Reviewer #3 (Remarks to the Author):

The authors have thoroughly responded to my concerns and the paper is now an excellent fit for this journal.

**Reply to referee comments:**

**Response:** We thank all the reviewers for their time and we are delighted that all of you are satisfied with our revisions.

REVIEWERS' COMMENTS:

Reviewer #1 (Remarks to the Author):

The authors have responded adequately and I have no further concerns.

Reviewer #2 (Remarks to the Author):

The authors have appropriately addressed all my concerns and have discussed their findings in light of recent papers on the role of the HIF system in the context of ferroptosis. Therefore, I have no further comments.

Reviewer #3 (Remarks to the Author):

The authors have thoroughly responded to my concerns and the paper is now an excellent fit for this journal.
