# Supplementary material for: A GPX4-dependent cancer cell state underlies the clear-cell morphology and confers sensitivity to ferroptosis
Source: Nat Commun. 2019 Apr 8;10:1617. doi: 10.1038/s41467-019-09277-9 (PMC6453886; doi:10.1038/s41467-019-09277-9)
Supplement: Supplementary file 4 — Supplementary Data 1 [file 41467_2019_9277_MOESM4_ESM.xlsx]

## Sheet: Table S1.CRISPR.screen.day4
Supplementary Data 1	CRISPR screen analysis of day 4 ML210 vs DMSO-treated conditions
Gene Symbol	Average LFC	Average -log(p-values)	Number of perturbations	Perturbations	Individual LFCs	Ascending ranks	Individual ascending -log(p-values)	Descending ranks	Individual descending -log(p-values)
ATRX	-1.49822	0.988371	7	CTTACCAAGGCCCATACAGT;GCCGAGGCGGGCAGATCACG;GGAATCTCACTCTGTCACCC;AATTAGTGCGGAATAAGAGT;GAAAATCTCAAAAAACGCGG;ATGATTTAAAGACTCAGGCG;CAAGGCAGGCAGATCACCTG	-3.18;-1.91;-1.53;-1.45;-1.35;-0.54;-0.53	22178;46089;52067;53365;54817;65822;65843	5.77E-01;1.09E+00;9.11E-01;6.25E-01;4.97E-01;4.02E-01;4.93E-01	11599;11620;22625;24077;25378;31359;55246	4.02E-01;6.78E-01;6.59E-01;9.71E-01;1.45E+00;1.74E+00;1.03E+00
LOC107986700	-0.533336	0.82455	1	CAAGGCAGGCAGATCACCTG	-0.53	65843	0.0705	11599	0.825
TCOF1	-2.92101	1.13448	4	GACCAACGTAGTATTTGCTG;TTAGGGTCGACAAAAATCAG;CAGTTGCCAAGGCCCAGGCG;GACAGGTCTTGCAGTAACCG	-4.71;-4.58;-1.68;-0.71	1125;1768;49619;63840	1.25E+00;2.53E+00;4.22E-01;3.36E-01	13602;27827;75674;76317	4.05E-01;4.98E-01;1.07E+00;2.54E-02
NSRP1	-1.65996	0.700384	6	CTGAAGGCTTTCACTCACAG;CTTCGATGCTAAGAGCAGTG;GGATTCTCATAGGCACAGAG;AGTACCAGGCACCACACGAA;CAAGGCAGGCAGATCACCTG;GAGAATCGCTTGAATCCGGG	-3.3;-3.01;-1.8;-1.76;-0.53;0.44	19695;26090;47805;48388;65843;73043	4.54E-01;4.83E-01;5.79E-01;4.92E-01;3.99E-01;1.52E-01	4399;11599;29054;29637;51328;57729	5.94E-01;7.55E-01;5.89E-01;9.11E-01;5.87E-01;7.65E-01
SPPL3	-2.76088	0.723527	6	GAAACGTCCACAGCAACCAA;GCTTCCGGGATAGAACGTCA;CACCATCCATGAGAAGCCAA;AGACAGATGCTCCAATTGGA;GCCGAGGCGGGCAGATCACG;CAAGGCAGGCAGATCACCTG	-4.23;-3.69;-3.16;-3.03;-1.91;-0.53	4505;11832;22700;25586;46089;65843	5.87E-01;7.44E-01;7.50E-01;1.10E+00;7.41E-01;4.23E-01	11599;31359;51879;54723;65595;72937	3.99E-01;5.11E-01;6.65E-01;4.92E-01;3.98E-01;1.56E-01
OPA3	-1.12592	1.01819	6	ATGGCGAAGCTGCTATACTT;GGAATCTCACTCTGTCACCC;GGTCATCAAGCCGCTGAACG;GCTTGCCAACCGTATTAAGG;CAAGGCAGGCAGATCACCTG;CCCCGCAGTGTATCACTGGG	-3.86;-1.53;-1.23;-0.96;-0.53;1.35	9242;52067;56708;60637;65843;75139	4.21E-01;1.11E+00;8.22E-01;5.76E-01;3.99E-01;7.86E-02	2303;11599;16805;20734;25378;68198	8.14E-01;7.55E-01;1.01E+00;1.38E+00;1.82E+00;3.31E-01
OPA1	-2.61606	0.941935	4	ATACGCAAGATCATCTGCCA;AAAAGCAGTCTGATACTGCA;TCAGTGGAAAGATATGATAC;ATACTTACATTAATCACACC	-4.68;-4.38;-1.63;0.22	1277;3188;50584;72136	1.20E+00;2.03E+00;4.13E-01;1.23E-01	5306;26858;74254;76165	6.55E-01;5.12E-01;8.38E-01;2.89E-02
RNF219-AS1	-1.81786	0.679287	7	CACCCGCATATGCACAGCCT;GATGTGGTCCAGCAGATCGC;ACGGCACGCTGTTCATCGTG;GTCCATCTGCGACTCGGACA;TGAAGGCAACTAAGGGACAA;CAAGGCAGGCAGATCACCTG;TCCTGCCTCAGCCTCCCGAG	-3.85;-3.52;-2.04;-1.55;-0.84;-0.53;-0.4	9379;15054;44141;51703;62220;65843;67218	4.08E-01;5.70E-01;6.54E-01;5.93E-01;5.66E-01;4.02E-01;4.30E-01	10224;11599;15222;25739;33301;62369;68055	4.03E-01;6.79E-01;9.56E-01;8.96E-01;9.99E-01;4.30E-01;3.93E-01
LOC105369748	-3.02787	0.956258	5	ACTAACCGTGGTCACTACAC;CCAGCGGGCAACAGGCCATG;TGTCAAAGGCTTCGTAGCAG;ATGTAATGAGAAATTTAACC;CAAGGCAGGCAGATCACCTG	-4.31;-4.27;-3.11;-2.91;-0.53	3785;4101;23811;28227;65843	6.99E-01;1.62E+00;8.56E-01;1.25E+00;3.52E-01	11599;49200;53632;73338;73655	4.07E-01;7.08E-01;5.03E-01;6.71E-01;1.09E-01
ITGA8	-2.34424	0.581943	5	CGGGTCGGGCGACTTACGTG;TCGAGTTCAAATCCAATCAG;ATAGACAAGAATGATTACCC;GTTAACATCTGATACGACAA;GAGAATCGCTTGAATCCGGG	-3.73;-3.57;-3.4;-1.46;0.44	11281;14017;17389;53055;73043	4.11E-01;7.45E-01;1.17E+00;4.60E-01;1.27E-01	4399;24386;60053;63415;66175	6.48E-01;4.96E-01;6.29E-01;3.90E-01;3.41E-01
ITGA9	-1.6386	0.640596	4	GTCCTGCGGAAAGACCTGCC;GGAAACATTGAAGGACACGT;CCTGAGAAGAACCACGCTGT;GTATAAGAAGAAGTACGGAG	-3.91;-1.29;-1.26;-0.1	8463;55787;56159;69769	5.10E-01;6.14E-01;3.78E-01;1.81E-01	7673;21283;21655;68979	5.38E-01;6.23E-01;1.20E+00;2.01E-01
ITGA1	-2.81085	0.917158	9	GGTAGATCCAACTTTACACA;AGAATGAGTATGTCAAGATG;ACTGCTCCCTCACAAATCCT;TGACTAAGCAGATATGGGCG;GGCTTGAGAGTCGAAGTCGA;ACAGCGTATTCCATCAGGTG;TGGCCTGTATGATTGTACCG;GCCGAGGCGGGCAGATCACG;TGCAACAAGTACCTCTTCGG	-4.17;-3.94;-3.27;-3.12;-3.12;-3.08;-2.54;-1.91;-0.15	5123;8073;20321;23560;23681;24531;35625;46089;69416	4.63E-01;7.42E-01;6.12E-01;7.54E-01;1.11E+00;1.57E+00;1.34E+00;1.24E+00;4.28E-01	8026;31359;41799;52932;53735;53900;57116;69369;72320	4.10E-01;8.07E-01;9.01E-01;1.06E+00;7.50E-01;5.71E-01;5.31E-01;4.10E-01;2.67E-01
ITGA2	-2.20508	0.491356	6	GACATCAGTCTGGAAAACCC;GCAACCATGACAATATACTG;AAAGGCACCAATAGACACAT;TGGGAATCAGTATTACACAA;TCGCCCAAGCTAGAGTGCAG;TCCTGCCTCAGCCTCCCGAG	-3.69;-3.17;-2.92;-1.65;-1.41;-0.4	11868;22566;28087;50230;53961;67218	3.98E-01;4.93E-01;6.07E-01;4.84E-01;5.25E-01;3.69E-01	10224;23475;27212;49337;54868;65589	4.09E-01;4.88E-01;6.26E-01;4.87E-01;5.05E-01;4.33E-01
ITGA3	-2.56391	0.613998	4	CTTCTACCCAGACCTTCTAG;GTACACAGCACCAGTCCGGT;TGCTATTGCACATCTCGTTG;GGCACTCACGGGGCGCACTG	-4.44;-2.41;-1.96;-1.45	2671;38109;45401;53363	9.06E-01;4.26E-01;4.77E-01;6.47E-01	24079;32041;39333;74771	3.90E-01;4.52E-01;5.89E-01;6.10E-02
ITGA4	-2.45655	1.30311	4	ATCATCTCCAGCATTAAACA;AGTTCCAATACCTACCACGA;CATATTTGTCACTTCCAACG;CTCACCATCGGTTCGCCCCG	-4.65;-4.36;-3.77;2.95	1438;3363;10601;76509	1.15E+00;1.99E+00;2.05E+00;2.10E-02	933;66853;74079;76004	1.33E+00;1.08E+00;8.18E-01;3.25E-02
ITGA5	-2.04983	0.602664	4	TGGATCGGACCCCTGACGGG;CACTAGCGGACACGATGGGG;CCCCGAGTACCTGATCAACC;AATTCGGGTGAAGTTATCTG	-4.49;-1.4;-1.16;-1.15	2351;53992;57737;57835	9.56E-01;5.73E-01;3.75E-01;5.07E-01	19607;19705;23450;75094	3.75E-01;6.66E-01;1.11E+00;5.35E-02
ITGA6	-2.80355	0.730338	5	AGATGGCGATGACGCCCATG;TTTCCAGTTATAAGTACCCG;CGGATCGAGTTTGATAACGA;GGAGCTCCGTATGATGACTT;GCCGAGGCGGGCAGATCACG	-3.81;-2.86;-2.8;-2.64;-1.91	9945;29390;30646;33930;46089	4.31E-01;4.63E-01;6.45E-01;9.85E-01;1.13E+00	31359;43543;46796;48025;67497	5.95E-01;5.76E-01;4.61E-01;5.51E-01;2.98E-01
ITGA7	-2.83748	0.719922	4	CGGCTCAGGAACGTCACACG;TTGGCGCTCAAAGAAGTAGG;CTGTACCCGGGTCAGCGACA;TACAGAGTGGACATCGACCA	-3.95;-3.76;-1.85;-1.79	7896;10761;47021;48019	5.30E-01;1.07E+00;4.54E-01;8.30E-01	29423;30421;66681;69562	4.41E-01;4.67E-01;4.50E-01;1.86E-01
TRHR	-2.23521	0.46075	4	TCATGAGAACCAAGCACATG;GATGCTATTGTGATATCCTG;AAAGGCTGTTATTGAACAAG;TCCAACATAGCCATAGACCC	-3.91;-3.17;-1.07;-0.8	8470;22563;59037;62751	5.10E-01;5.92E-01;3.76E-01;3.65E-01	14691;18405;54865;68974	3.94E-01;7.06E-01;3.82E-01;2.01E-01
UFSP1	-2.16777	0.445984	4	CGCCTCTGCCACGTACCCCG;GCTTTACTCGCACTTCGCAG;CCTTGCTGGGAGTCTGCGTA;AGGGTCCAATACCAGGACAT	-3.42;-3.09;-1.47;-0.7	17063;24187;53043;63963	3.79E-01;5.58E-01;3.93E-01;3.32E-01	13479;24399;53277;60364	4.06E-01;5.54E-01;3.91E-01;4.33E-01
UFSP2	-2.99644	0.806403	4	ATATAGATTTATGTGGTCCA;GCCATATATACACTGAACTG;AGCTAGCTACTCCTAATGGT;TCATAATCAACTAACTGACA	-4.1;-3.58;-3.26;-1.05	5914;13875;20571;59389	6.19E-01;8.87E-01;1.26E+00;4.61E-01	18053;56869;63577;71532	3.76E-01;6.41E-01;4.02E-01;1.38E-01
LOC107987079	-1.91411	0.392609	1	GCCGAGGCGGGCAGATCACG	-1.91	46089	0.225	31359	0.393
LOC107987075	-1.40634	0.518365	1	TCGCCCAAGCTAGAGTGCAG	-1.41	53961	0.157	23475	0.518
TEX28P2	-2.41901	0.498243	4	GGAGTCCTATCACAGCCTAA;ACAACTTACAGGATAGTGTC;CAGGAGGAGAAGTGTAGGTG;AAGCGACTCTCCAAGATGAA	-3.49;-3.44;-2.33;-0.41	15552;16609;39380;67081	3.87E-01;7.69E-01;5.88E-01;2.49E-01	10361;38062;60843;61880	4.59E-01;4.26E-01;3.81E-01;3.90E-01
TEX28P1	-2.41901	0.498243	4	GGAGTCCTATCACAGCCTAA;ACAACTTACAGGATAGTGTC;CAGGAGGAGAAGTGTAGGTG;AAGCGACTCTCCAAGATGAA	-3.49;-3.44;-2.33;-0.41	15552;16609;39380;67081	3.87E-01;7.69E-01;5.88E-01;2.49E-01	10361;38062;60843;61880	4.59E-01;4.26E-01;3.81E-01;3.90E-01
FAM212B	-0.80146	1.17821	5	GACTTGCCAGAACTGGAGAA;GCCGAGGCGGGCAGATCACG;TCGACAGCCTCTGGTGTTAG;GCACCAAGTTTCCATCCCAT;CTCTGCCACCCTCCCAACAA	-2.33;-1.91;-1.18;0.14;1.27	39464;46089;57361;71731;75034	8.32E-01;6.29E-01;5.63E-01;5.66E-01;6.86E-02	2408;5711;20081;31359;37978	8.63E-01;1.36E+00;1.02E+00;1.10E+00;1.55E+00
FAM212A	-1.59094	0.615214	4	GAGAGGCACTGCCTACGAAG;GTGTCCCGACCACACAACTG;ACAGCAGCCCTACTGAACAG;GTCAGGCAGCACATGGCGAG	-3.43;-2.49;-1.09;0.64	16836;36687;58771;73710	3.80E-01;4.28E-01;3.75E-01;8.58E-02	3732;18671;40755;60611	7.79E-01;6.97E-01;5.59E-01;4.26E-01
CHST9	-2.5512	0.632923	5	ACACAAAATCTTATATTGTG;AGACTTGCAAATACATGAAG;GGGGACCAGTGAAGTACTTG;GCCGAGGCGGGCAGATCACG;AAGTTGATTGAAAAACGTCA	-4.01;-3.9;-3.08;-1.91;0.15	7036;8553;24484;46089;71785	5.08E-01;1.07E+00;8.30E-01;5.95E-01;1.65E-01	5657;31359;52946;68898;70401	5.69E-01;4.62E-01;4.95E-01;4.61E-01;2.07E-01
CHST8	-0.662054	1.30307	6	CTGGACACCTTCGACCGCCA;GGAATCTCACTCTGTCACCC;CACTCGGGACTTATCCAGTG;CAAGGCAGGCAGATCACCTG;AAGATACGGGACACGTGGCG;TAAAGTTCAACATCAGGCCA	-3.5;-1.53;-0.64;-0.53;-0.37;2.6	15516;52067;64635;65843;67469;76296	4.06E-01;1.11E+00;1.28E+00;7.55E-01;4.11E-01;3.88E-02	1146;9973;11599;12807;25378;61926	1.08E+00;8.44E-01;1.38E+00;2.11E+00;1.82E+00;5.83E-01
CHST1	-3.33486	1.07299	4	CGGGCTACTCAACCTGACCG;ACCGACAGGATCTTCCGCCG;TGGCGCCTAGCATGACCCGC;GCGAAGCCAGAATGCCGCGG	-4.45;-4.11;-3.08;-1.7	2631;5843;24460;49397	9.12E-01;1.53E+00;1.06E+00;7.81E-01	28045;52978;71594;74804	4.25E-01;5.53E-01;6.22E-01;6.02E-02
CHST3	-3.46673	1.1329	4	ACTCAGTTCATGTTCCGCCG;GAAGAACTCGCCCACGAACG;CACTGCAAGAACCGCCGCTG;GAGCACGTCGCGGTACACCA	-4.52;-3.29;-3.2;-2.86	2106;19928;21848;29403	9.99E-01;6.59E-01;1.19E+00;1.68E+00	48064;55594;57491;75336	8.68E-01;6.09E-01;3.75E-01;4.79E-02
CHST2	-2.05185	0.446429	4	ATGGCAAAAACTGTATCCGG;TCCGTGAACTCGCCACCGCG;TGGTGTACGTGTTCACCACG;GAACACCTTCATTCCGAGAG	-3.96;-2.44;-1.59;-0.21	7760;37492;51092;68901	5.35E-01;4.27E-01;4.08E-01;2.03E-01	8541;26350;39950;69688	5.08E-01;5.19E-01;5.75E-01;1.83E-01
SPDYE12P	-2.84245	0.520666	2	TAGATCCCAGCCCCCCACGT;CGTGCTCCCTGAGTACTACG	-3.2;-2.49	21877;36675	3.92E-01;6.49E-01	40781;55540	3.02E-01;2.89E-01
CHST4	-0.663479	1.14438	5	CACCTGAACCTGGGAGACAG;CCGGGGACCAGGTTCCATGT;TGATGTTGTGGCTGTACATG;CAGTCAACAGCCCTTTGAGG;CCTGCATCACATAGTAGGGT	-3.23;-1.17;-1.03;-0.34;2.45	21108;57491;59676;67760;76189	4.18E-01;1.03E+00;6.18E-01;4.36E-01;3.54E-02	1253;9682;17766;19951;56348	1.12E+00;9.80E-01;1.14E+00;1.79E+00;6.90E-01
CHST7	-1.44747	0.844709	4	GCTGGTTAAAGAGTTCGCCC;GGGCGCGTATCGCCACGGGT;TGACCTTGTTAGTCCGCCAG;GTCCCCTCCGTATTGGACGG	-2.35;-1.46;-1.07;-0.91	39034;53206;58959;61316	6.09E-01;5.57E-01;3.75E-01;4.06E-01	16126;18483;24236;38421	3.84E-01;7.03E-01;1.07E+00;1.22E+00
CHST6	-1.5708	0.786645	5	TAGCCACGTACGCATCGCCG;CAAACACGTCCATGTCGCAC;CAAGGCAGGCAGATCACCTG;GCTGGGCACCAACGGCACGT;GGTGGTCCACACGTGCCACG	-3.6;-3.27;-0.53;-0.28;-0.16	13506;20162;65843;68312;69316	3.92E-01;5.62E-01;8.61E-01;4.47E-01;2.41E-01	8126;9130;11599;57266;63941	4.73E-01;1.02E+00;1.61E+00;4.09E-01;4.16E-01
ITGAX	-0.963043	1.01776	4	ACAGCTGCCAACCAAACGGG;GCTGCAAGGGTTTACATACA;AGGTAGGGCTCATATTTGGG;GCTGACAGACGTGGTCATCG	-2.23;-1.17;-1.16;0.71	41015;57591;57654;73888	6.57E-01;6.61E-01;3.75E-01;8.16E-02	3554;19788;19851;36427	7.97E-01;6.63E-01;1.30E+00;1.31E+00
RPS4XP3	-2.8152	0.40793	1	TGTACATCGTATTACACCTG	-2.82	30272	0.408	47150	0.215
BCL2A1	-3.02429	1.33927	6	AGCAATACTGTTGACCAGAA;CTGGTCAACAGTATTGCTTC;GAAGACGGCATCATTAACTG;AACACTATTCAACCAAGTGA;GTCCTACAGATACCACAACC;CTTATAGGTATCCACATCCG	-4.73;-4.63;-4.37;-1.78;-1.75;-0.89	1040;1512;3257;48146;48635;61604	1.12E+00;2.28E+00;2.88E+00;4.94E-01;6.61E-01;5.96E-01	15838;28807;29296;74185;75930;76400	4.08E-01;4.91E-01;5.85E-01;1.65E+00;9.74E-01;3.53E-02
ITGAV	-2.45369	0.648957	5	AGGCAATAGAGATTATGCCA;AACGATGAGCTCAGCTTCGT;AGAACATGACTATTTCAAGG;GCACCTCTCTTCATGGATCG;CAAGGCAGGCAGATCACCTG	-4.8;-3.22;-1.88;-1.83;-0.53	760;21312;46647;47416;65843	1.33E+00;5.40E-01;4.61E-01;5.65E-01;3.52E-01	11599;30026;30795;56155;76683	4.07E-01;4.62E-01;6.42E-01;4.20E-01;2.14E-02
ITGAL	-0.554943	0.91419	4	GCCACCGGACCAGAAGACGG;GGAGCTGTGTGGCGTCGACG;CCAGGTCACGGTGTAACCTG;TCTGGCGGAAGAGGTAACAC	-3.38;-1.88;-1.14;4.18	17969;46640;57952;77056	3.76E-01;4.63E-01;3.75E-01;8.66E-03	386;19490;30802;59473	1.71E+00;6.72E-01;8.19E-01;4.59E-01
ITGAM	-1.35672	0.741458	4	TCATCCGCCGAAAGTCATGT;AGTTCAGGCGCAGCACAATG;ATTTGAGTGTAATGATCAGG;TGGAACACGTGATCACGAGG	-3.82;-1.44;-0.72;0.55	9753;53406;63724;73442	4.73E-01;5.61E-01;4.04E-01;9.21E-02	4000;13718;24036;67695	7.54E-01;8.95E-01;1.08E+00;2.34E-01
ITGAD	-1.5108	0.800811	4	CTTCAGCACAGCCCTCACAA;CACGAGAAGTCAGACGACCT;GGCGCACCCCGATAGCGTAG;TGGCGGCCAACCAGACGGGA	-2.17;-1.93;-1.19;-0.76	42013;45877;57237;63255	6.82E-01;4.56E-01;3.75E-01;3.52E-01	14187;20205;31565;35429	3.99E-01;6.51E-01;7.95E-01;1.36E+00
ITGAE	-1.49389	0.756537	9	TAAGAGTGCTAGGACTGCGA;GTATATCTACAATGGACACT;GTCTGTCAAGCACAGGCAAG;TCCAGAACATCACTCAAGTG;GCTTAGCAAATACATAGAGG;GCCCCATGATGTTTGTACCG;GCAGCCTCAGCCGTCCCGAG;GAGAATCGCTTGAATCCGGG;TGGAGAGAACTAGATCAAGC	-4.59;-3.45;-2.83;-2.59;-1.79;-1.18;-0.73;0.44;3.27	1736;16475;30018;34739;47966;57325;63546;73043;76662	7.74E-01;5.15E-01;5.88E-01;5.85E-01;6.18E-01;6.16E-01;5.37E-01;4.95E-01;3.95E-02	780;4399;13896;20117;29485;42700;47437;60982;75707	1.08E+00;1.11E+00;8.29E-01;8.94E-01;8.29E-01;6.71E-01;7.57E-01;5.48E-01;8.85E-02
LOC107984670	-4.23391	1.23779	1	TACCGAAGTCAATGTCGAGG	-4.23	4479	1.24	72958	0.0259
LOC107984671	-1.40601	0.985511	12	TGTATACACACAGCCTGCAA;TTACTGCTGCTGGTTCTATG;AAAGATTTGGGGCATACTCT;CAATGCAACAGGGCAATGAG;GCATTGTCTGCAAAAATCGT;ATGCACTAGTGACAACTGGA;TACTCTTTGAATTCTCGACT;AATTTCAAACCAGTGAGCCT;TCTGTACAAGCAGTGTGCAT;ACATGTTTATCTATATCTCA;CTTCCGAAATGCATATGTAT;GTGCATGCATCAATGAGAAG	-4.28;-3.85;-3.67;-3.1;-3.08;-1.86;-0.74;-0.63;-0.26;-0.17;-0.1;4.88	4004;9288;12237;23939;24437;47005;63405;64736;68508;69246;69781;77260	4.61E-01;5.77E-01;7.34E-01;6.30E-01;7.59E-01;7.69E-01;1.42E+00;1.07E+00;9.51E-01;6.17E-01;4.23E-01;1.22E-02	182;7661;8196;8934;12706;14037;30437;52991;53487;65205;68162;73438	1.56E+00;6.42E-01;1.02E+00;1.48E+00;1.57E+00;2.01E+00;1.02E+00;6.26E-01;6.33E-01;5.30E-01;4.52E-01;2.77E-01
LOC101928957	-1.52854	0.484514	1	GGAATCTCACTCTGTCACCC	-1.53	52067	0.172	25378	0.485
LOC101928953	-1.99261	0.581291	6	TGACACAGAGCGCACGAGGG;CGCACTCACCTGGCCCCAGT;GAGACTGCCATGGCCGACCG;CCAGCGTGGCCGAGTAGAGT;CCATGCCCAGCCTACCACGA;AGCCGCCAACGGGTTCAGCG	-3.21;-3.2;-2.78;-1.88;-0.94;0.06	21551;21859;30923;46627;60830;71248	4.86E-01;4.99E-01;5.59E-01;5.06E-01;4.15E-01;2.17E-01	6194;16612;30815;46519;55587;55910	5.00E-01;5.80E-01;5.61E-01;5.07E-01;4.91E-01;8.49E-01
IGF2R	-1.63484	0.638887	4	TAATCCACTCAATTTCATAG;GCTCAAAGATCCATTCGCCG;GTGTGCACTACTTTGAGTGG;TTCTGTCTTAGACAGCACAC	-3.35;-3.13;-0.67;0.6	18563;23420;64354;73580	3.75E-01;5.73E-01;4.11E-01;8.88E-02	3862;13088;54039;58897	7.67E-01;9.27E-01;3.86E-01;4.76E-01
SLC36A4	-1.3966	0.757524	4	AGAGAAGAAGTGTTGACCTA;AAGCGTTGAATATTGGCATG;ACTGACAGCCATGGAAACGT;TACCAACTTGATGATCAAGA	-3.24;-1.83;-0.4;-0.12	20998;47421;67179;69658	3.77E-01;4.71E-01;4.61E-01;1.84E-01	7784;10263;30021;56424	5.34E-01;1.10E+00;8.46E-01;5.50E-01
SLC36A3	-3.75342	1.98012	4	TGAAATGCAACATTGGCACA;TCATCCTCTATATCTTACTG;GGTTTCAAGGCCGTACATCG;CAGAGCCATGCTCCCAAGGG	-4.52;-4.5;-4.48;-1.51	2125;2280;2410;52308	9.96E-01;2.31E+00;3.93E+00;6.82E-01	25134;75034;75162;75317	3.98E-01;2.26E+00;9.68E-01;4.83E-02
CKS1B	-4.10507	2.07129	4	ACGACGAGGAGTTTGAGTAT;CAGACATGTCATGCTGCCCA;TTCAGATTCAGACATCAGAT;TTCGGACAAATACGACGACG	-5.04;-4.4;-3.86;-3.12	235;2994;9272;23592	1.92E+00;2.08E+00;2.22E+00;2.06E+00	53829;68176;74451;77206	1.10E+00;1.18E+00;8.63E-01;5.28E-03
SLC36A1	-0.546843	1.41779	6	CCTGCTGATCATAGGCATCG;AGGATGAGTGGGAACTTCCG;GCTTTGACCAAAGCGCTGGT;TCCTGCCTCAGCCTCCCGAG;GAGAATCGCTTGAATCCGGG;AGTATCACCATAATCCACAA	-2.73;-1.67;-1.09;-0.4;0.44;2.16	32041;49894;58785;67218;73043;75967	7.65E-01;1.00E+00;9.13E-01;8.29E-01;5.95E-01;5.01E-02	1475;4399;10224;18657;27548;45401	9.84E-01;1.42E+00;1.52E+00;1.54E+00;1.66E+00;1.39E+00
LOC101929028	-1.28087	0.789134	3	GCCGAGGCGGGCAGATCACG;GGAATCTCACTCTGTCACCC;TCCTGCCTCAGCCTCCCGAG	-1.91;-1.53;-0.4	46089;52067;67218	5.34E-01;3.52E-01;1.84E-01	10224;25378;31359	5.25E-01;6.64E-01;1.18E+00
C14orf119	-2.60332	0.610188	4	TGGCACTCAAAGATAGAAGG;GGGGAAGGGTTAGTATTGTG;GAGGTGATGTAAGACATCAG;CCAGCGTGAACGTTTCCTAG	-4.43;-2.7;-1.81;-1.47	2807;32568;47685;52941	8.87E-01;4.48E-01;4.45E-01;6.61E-01	24501;29757;44874;74635	3.93E-01;4.74E-01;4.85E-01;6.41E-02
ART1	-1.31002	0.82023	4	GCCAGCGTACTGGTCATCAA;GGCTGCAACATGCTTCAGGG;AGAGGTCTCGTCGTGTGATG;TCTCCCGGATCTCAACCACA	-2.64;-1.85;-0.74;0.0	33757;47037;63395;70783	5.04E-01;4.67E-01;4.00E-01;1.56E-01	6790;14047;30405;43667	5.75E-01;8.78E-01;8.33E-01;9.95E-01
ART3	-2.57468	0.820841	13	AGAGGACGCTGTCTTTGCAT;GAAGGGCATGGCTATAGCCT;CCAGCAATTAGATACTGTGT;GGCTTCCCCATGTTCAAAAG;AGATGGATAACACAGTGAGC;AATACCTGAAATGTACGGAC;GTTGCTGAGAAAACCTTGTG;ACTCACATGATCTCAACACG;GTTACTTGGGTACATTATGG;GCCGAGGCGGGCAGATCACG;GTAATCAACCTGTTAATCCA;CGTGGACAAAATTGGCTTGC;CAGCGTACAGTTCTAGAGAG	-4.42;-3.89;-3.68;-3.67;-3.63;-3.19;-2.46;-2.4;-2.34;-1.91;-1.11;-0.81;0.04	2888;8718;12166;12351;12936;22062;37117;38261;39144;46089;58392;62538;71125	5.12E-01;5.76E-01;6.97E-01;1.01E+00;1.41E+00;1.06E+00;7.02E-01;8.20E-01;1.04E+00;9.76E-01;6.75E-01;7.16E-01;4.80E-01	6317;14904;19050;31359;38298;39172;40325;55381;64498;65094;65270;68735;74554	4.18E-01;5.60E-01;5.97E-01;7.45E-01;7.90E-01;6.84E-01;6.66E-01;7.82E-01;9.68E-01;6.90E-01;5.32E-01;4.57E-01;2.15E-01
ART5	-1.78248	0.565933	4	GGGAGTTGAATCAGGCCGTG;GCCTTCGCTTTGAACCCAAG;GGCAGCCCCCCTGCTAAAGG;ACCCACATAGGTATCGTCAA	-3.23;-2.67;-1.42;0.19	21198;33210;53776;71974	3.77E-01;4.44E-01;3.88E-01;1.27E-01	5468;23666;44232;56244	6.44E-01;5.68E-01;4.95E-01;5.56E-01
ART4	-2.23513	0.529507	4	TATGGAGAAACTAACTCAAG;TGAGGTGCATTATAGGACGA;CATGACTACCACACACGCTG;AATGAACGTTCATACTGCTG	-2.89;-2.73;-1.96;-1.37	28710;32135;45354;54554	4.32E-01;4.51E-01;4.78E-01;6.09E-01	22888;32088;45287;48756	3.84E-01;4.52E-01;4.79E-01;8.04E-01
CRTAM	-2.64896	0.560931	4	TTATGGCAAAAATTCAACGG;GAAGTGAAAGTGATTGTGCT;GTAGCCAGGTTATCTGCGGA;GTACACGCCTTCATCTTGCA	-3.66;-3.23;-2.37;-1.34	12533;21087;38774;54946	4.19E-01;6.28E-01;6.01E-01;5.96E-01	22496;38683;56355;64909	3.82E-01;4.26E-01;3.77E-01;3.07E-01
CADPS2	-2.0842	0.72023	17	CTTTCTCCCCACCTCAACCA;ACAAGCAGCCCAGATCAGAA;CTTGCACTTATTGAACGGGG;AAGCTCCACTTTGAAGAGAG;CGTCATTCGAAACATAGTGG;CTGGCCCTCATCGAACGTGG;GGGGACGGAAAATATAGTCG;ATAAAAGATGAAATATGCTA;GCCGAGGCGGGCAGATCACG;GGTGAATGACAGTACCACGT;AGCTCTACGTCTTCGTCGTG;TCGCCCAAGCTAGAGTGCAG;AAAACATAGAAAAACGTGTG;CTGTGCCCGATGCGTGCCCA;CAAGGCAGGCAGATCACCTG;GGGGAGAATGCACATGCAGT;GGTTGGAAATGAGATCACAT	-4.35;-3.85;-3.48;-3.32;-2.99;-2.89;-2.57;-2.11;-1.91;-1.81;-1.51;-1.41;-1.2;-1.09;-0.53;-0.42;-0.0	3450;9320;15785;19257;26623;28679;35220;42945;46089;47710;52420;53961;57141;58718;65843;66980;70462	4.37E-01;5.41E-01;6.26E-01;6.55E-01;7.22E-01;7.06E-01;7.41E-01;8.23E-01;7.84E-01;7.25E-01;7.16E-01;6.82E-01;6.66E-01;7.00E-01;5.73E-01;6.47E-01;6.97E-01	6980;10462;11599;18718;20301;23475;25022;29732;31359;34497;42203;48743;50840;58203;61662;68124;73992	4.71E-01;5.51E-01;6.28E-01;6.52E-01;7.00E-01;7.43E-01;8.40E-01;8.33E-01;9.51E-01;1.02E+00;8.59E-01;7.77E-01;8.56E-01;7.18E-01;7.33E-01;5.80E-01;3.36E-01
RLF	-1.71244	0.679323	5	AACATGGTATCCTCTGTACA;GGAATACCGATGTTGGAACA;TTAACATGCTCCATCACATG;TTTGTAATCTGGAATCTGAG;CAAGGCAGGCAGATCACCTG	-3.91;-2.37;-0.93;-0.82;-0.53	8453;38746;60946;62496;65843	4.64E-01;5.05E-01;6.55E-01;3.88E-01;3.52E-01	11599;14946;16496;38696;68987	4.07E-01;7.08E-01;1.22E+00;8.07E-01;2.51E-01
USP17L30	-2.1602	1.25403	47	GCAGGTAGATCATCACTCTA;GACCTGCTGCGGTGGGGGCT;TTGCCAACTACATGCTGTCC;CCAAGTGCTCGTCCAACTCG;CAAACGTGTCATCGTCACAA;TGACGTGGCCAGGATTGTGG;CGTCCAACTCGGGGGCCTGG;CGTGGACCAGCACAGCATAG;GTGTAAAGTTAACGTCTTGG;TGAATTTCTCATGTTCACTG;TTGTGGTGTTTGTCTCCAGA;TGATCTACCTGCTTGTGCCC;AGCAGGTATTTCCCATATTC;ACACGGGTCTCACATGAGAG;TGTTTGTCTCCAGAGGGCGC;AGTGAACATGAGAAATTCAT;CTACCTGCTTGTGCCCGGGA;CCCTCACAGGCATTGGCTGC;TAGCAGGAGACCTGCTGCGG;…	-4.34;-4.08;-3.66;-3.52;-3.34;-3.29;-3.26;-3.26;-3.12;-3.04;-3.01;-2.95;-2.95;-2.76;-2.7;-2.64;-2.6;-2.58;-2.56;-2.56;-2.48;-2.44;-2.4;-2.35;-2.3;-2.12;-2.12;-2.1;-1.99;-1.95;-1.87;-1.8;-1.79;-1.76;-1.67;-1.61;-1.57;-1.49;-1.39;-1.05;-0.95;-0.83;-0.38;-0.	3547;6221;12393;15077;18734;19917;20390;20453;23622;25323;26109;27317;27360;31525;32729;33862;34658;35010;35293;35418;36809;37577;38165;39084;39810;42790;42852;43128;44953;45520;46764;47891;47924;48426;49862;50843;51440;52641;54226;59273;60780;62233;67454;69916;72542;72847;73145	6.04E-01;7.93E-01;1.51E+00;1.64E+00;1.95E+00;1.80E+00;1.57E+00;1.32E+00;1.51E+00;1.50E+00;1.38E+00;1.32E+00;1.16E+00;1.42E+00;1.37E+00;1.31E+00;1.23E+00;1.12E+00;1.04E+00;9.73E-01;9.67E-01;9.47E-01;9.37E-01;9.38E-01;9.48E-01;9.34E-01;9.50E-01;9.91E-01;9.81E-01;1.03E+00;1.05E+00;1.08E+00;1.21E+00;1.33E+00;1.35E+00;1.44E+00;1.60E+00;1.69E+00;1.72E+00;1.25E+00;1.29E+00;1.34E+00;8.85E-01;7.81E-01;6.4…	4297;4595;4900;7526;9988;15209;16662;18169;23210;24797;26002;26599;27580;29016;29518;29550;30678;31909;32484;34302;34599;34664;37645;38358;39261;39867;40605;42007;42166;42432;42795;43563;44731;45897;50082;50097;51346;52110;53838;56993;57056;57541;58689;62382;65034;71215;73895	7.24E-01;6.15E-01;6.35E-01;7.07E-01;7.80E-01;1.10E+00;1.08E+00;1.07E+00;1.46E+00;1.43E+00;1.37E+00;1.25E+00;1.18E+00;1.16E+00;1.08E+00;9.88E-01;9.70E-01;9.60E-01;9.38E-01;9.44E-01;9.34E-01;9.53E-01;9.37E-01;9.46E-01;9.61E-01;9.94E-01;1.03E+00;1.05E+00;1.14E+00;1.26E+00;1.40E+00;1.51E+00;1.57E+00;1.65E+00;1.33E+00;1.54E+00;1.61E+00;1.77E+00;1.79E+00;1.58E+00;1.89E+00;2.18E+00;2.39E+00;2.06E+00;1.9…
CRTAP	-1.10373	0.738375	4	CGAGCAGTGCGGGCATACAA;GCAGGAACTTGTAGGGCTCG;GAGTGTCTCGCAGCCTGCGA;TGCCGCTCGAGTCGGCCTAC	-4.28;-1.67;-1.19;2.72	4078;49913;57280;76359	7.47E-01;5.02E-01;3.75E-01;2.44E-02	1083;20162;27529;73364	1.27E+00;6.53E-01;9.36E-01;9.40E-02
ADPGK	-1.73167	0.737803	7	AAGATGAATCGGTTGGCATG;GCTGGCCAGTATGACTAACA;CCATCATGTGCAATCCAGAG;GGAATCTCACTCTGTCACCC;TCGCCCAAGCTAGAGTGCAG;CAAGGCAGGCAGATCACCTG;ACTCTCTTACAGCACTATGT	-3.87;-2.34;-2.27;-1.53;-1.41;-0.53;-0.18	9118;39163;40459;52067;53961;65843;69211	4.10E-01;8.00E-01;5.86E-01;5.99E-01;4.99E-01;4.02E-01;3.42E-01	8231;11599;23475;25378;36983;38281;68322	4.21E-01;6.79E-01;6.38E-01;9.11E-01;8.47E-01;1.29E+00;3.81E-01
CPEB4	-1.34602	0.830213	4	TTAACAAACCCCCCTCTCCG;AGTGCATGTCGAATGTCCTG;AGTGGAACGATATTCTCGAA;TGTGAGAGAGGCCCGATCTG	-3.39;-0.97;-0.7;-0.33	17703;60531;63928;67848	3.77E-01;7.57E-01;4.06E-01;2.30E-01	9594;13514;16911;59719	4.77E-01;9.05E-01;1.49E+00;4.51E-01
CPEB1	-0.855432	1.20478	5	TCCACCAAGTCAGACCCAAG;TGCACTACACCTATAAACCG;CAAGGCAGGCAGATCACCTG;ATGGGGTTCTTATAGTTCCG;CAAAGAGCCAAAAACACGGA	-3.62;-1.15;-0.53;0.27;0.76	13097;57802;65843;72397;74032	3.95E-01;1.04E+00;8.61E-01;6.04E-01;9.78E-02	3410;5045;11599;19640;64345	7.35E-01;1.46E+00;1.61E+00;1.81E+00;4.02E-01
CPEB3	-1.97518	0.565097	6	CTGGTGGCCGTACGCCGCGG;ATGACAAGGCTTGATCACCA;GCCGAGGCGGGCAGATCACG;GCCGCCCAAGTTCCCTCGCG;ATATCAGCGAAACTCATTGG;CAAGGCAGGCAGATCACCTG	-3.99;-2.97;-1.91;-1.39;-1.05;-0.53	7320;26916;46089;54166;59338;65843	4.62E-01;4.84E-01;5.53E-01;4.89E-01;4.31E-01;4.23E-01	11599;18104;23276;31359;50526;70121	3.99E-01;5.49E-01;7.31E-01;8.45E-01;6.08E-01;2.59E-01
SBSPON	-1.97574	0.510959	4	GCAAGCCTACAACCCGTGTG;CTGGAGTACTCCACCCCGCA;AACTACCTCTGCATTCAACA;CTGCTGCTTCGACTACGACA	-3.44;-3.13;-0.93;-0.4	16717;23309;60969;67200	3.81E-01;5.76E-01;3.82E-01;2.46E-01	10242;16473;54133;60719	4.61E-01;7.74E-01;3.86E-01;4.23E-01
SRBD1	-2.17712	0.505766	6	CGCAGCCACATACAGTTCGA;AAGACTGAGACATATCCTCA;TTGTGGACAAGGCTTCCGAG;GCCGAGGCGGGCAGATCACG;TCTGGCCTTGCAAAGCTACG;CAAGGCAGGCAGATCACCTG	-3.74;-2.89;-2.73;-1.91;-1.25;-0.53	11131;28593;32033;46089;56290;65843	4.01E-01;4.90E-01;5.45E-01;5.11E-01;4.78E-01;4.23E-01	11599;21152;31359;45426;48827;66323	3.99E-01;5.05E-01;5.53E-01;5.18E-01;6.56E-01;4.04E-01
ABAT	-2.12643	0.524662	5	GAAAGAAGTCATCGGATGCG;CCTTAAAGACCATCTTCATG;TGCAATTACGAAGAGAGCCG;GTGAATGGCTTTAGAGTGCG;CAAGGCAGGCAGATCACCTG	-3.29;-3.14;-2.77;-0.9;-0.53	19817;23217;31230;61402;65843	4.06E-01;5.11E-01;6.32E-01;3.88E-01;3.52E-01	11599;16040;46194;54223;57642	4.07E-01;6.70E-01;4.61E-01;4.43E-01;6.41E-01
POU5F1B	-0.990102	1.00779	4	GGTGGAGAGCAACTCCAATG;GCTGGGTTGATCCTCTGACC;CCCGCCGTATGAGTTATGTG;CAAAGCAGAAACCCTCATGC	-2.68;-2.51;0.25;0.98	33107;36219;72331;74518	4.94E-01;4.30E-01;6.67E-01;6.68E-02	2924;5111;41221;44347	8.71E-01;1.64E+00;5.50E-01;9.68E-01
LOC105379426	-3.2985	0.595476	1	CATTCAGCCTAGCACTGAAG	-3.3	19656	0.595	57781	0.127
PHOX2A	-1.56747	0.685173	4	GCTTCCAATACAGCCCCCTG;AGGCGGTGCTATCGGGCGTG;GGCGCCAAAGTCGCCGTAGG;CCCCGACATTTACACGCGTG	-3.47;-1.26;-1.25;-0.29	16049;56221;56329;68185	3.84E-01;6.24E-01;3.77E-01;2.21E-01	9257;21113;21221;61388	4.86E-01;6.27E-01;1.22E+00;4.04E-01
PHOX2B	-2.85726	0.718226	4	TACAAACTCTTCACGGACCA;GCTTGCGAAACTTGGCGCGG;CCTACGAGTCCTGTATGGCT;CTACCCCGACATCTACACTC	-4.58;-2.96;-2.76;-1.12	1757;27036;31426;58310	1.07E+00;5.09E-01;7.99E-01;4.93E-01	19132;46018;50407;75685	3.75E-01;4.57E-01;4.14E-01;3.98E-02
UPK2	-2.36669	0.455186	4	CAGGCTCTCCGTTAGCGCCG;GTGTGGCATTGCCTCCTGTG;AGAATTTGGTTCCTGGCACG;TTGTGGTGCCTCCGTGCCGT	-3.5;-2.87;-2.46;-0.65	15508;29151;37234;64567	3.87E-01;4.81E-01;6.37E-01;3.16E-01	12875;40208;48266;61949	4.14E-01;4.27E-01;4.38E-01;3.88E-01
CFH	-3.06847	1.03277	7	ATAGTGGAGGAGAGTACCTG;ACATCAGGATCAATTACATG;GAAATGCATTGTTCAGACGA;AGACCAGTATAAAGTTGGAG;GAGCCCTTATGAAATGTTTG;GCCGAGGCGGGCAGATCACG;GGAATCTCACTCTGTCACCC	-4.91;-3.91;-3.39;-3.16;-2.65;-1.91;-1.53	455;8413;17591;22602;33572;46089;52067	1.40E+00;8.56E-01;8.35E-01;1.04E+00;9.86E-01;9.00E-01;1.21E+00	25378;31359;43881;54825;59829;69040;76987	6.74E-01;5.90E-01;6.49E-01;6.60E-01;5.24E-01;4.19E-01;1.79E-02
CFI	-2.73163	0.937809	4	AGAAGACTTTATCGCAGGAG;TGAGGTGGACTGCATTACAG;GATGCCAGTGGAATCACCTG;TGTCTACATGTGCATTGCCG	-4.62;-4.27;-1.04;-1.0	1581;4116;59508;60058	1.11E+00;1.82E+00;3.76E-01;4.42E-01	17384;17934;73326;75859	3.78E-01;7.21E-01;7.44E-01;3.59E-02
CFD	-1.33726	0.869545	4	CCCCGTGGTCGGATCCTGGG;ATGGCGTCGGTGCAGCTGAA;ACCGGGAACTCTCTGCGACG;ACGTCGTACAGGCGCTTGGA	-2.76;-1.12;-0.87;-0.6	31505;58287;61844;65063	4.69E-01;6.82E-01;3.87E-01;3.03E-01	12379;15598;19155;45955	4.21E-01;8.09E-01;1.34E+00;9.07E-01
CFB	-2.66827	0.58741	4	TGTCTGATCCATCTAGCACC;TATGACGGTTACACTCTCCG;TCTGCAGGATTGCACAACAT;CATGTACGACACCCCTCAAG	-4.24;-2.92;-2.72;-0.79	4391;28036;32330;62810	7.20E-01;4.95E-01;7.71E-01;3.64E-01	14632;45105;49405;73051	3.94E-01;4.50E-01;4.25E-01;1.01E-01
TPT1-AS1	-0.533336	0.82455	1	CAAGGCAGGCAGATCACCTG	-0.53	65843	0.0705	11599	0.825
CFP	-1.14902	0.996496	4	TTTGCCTACCAGAAACGTAG;ACAGCGCCGGTACCGCAGCT;GCTCAGGTGCAGAACACTTG;TGGGCCAGACCATGGAACAA	-3.89;-0.5;-0.29;0.08	8771;66236;68247;71380	5.00E-01;1.04E+00;4.88E-01;1.42E-01	6062;9195;11206;68681	6.10E-01;1.18E+00;1.98E+00;2.09E-01
AAAS	-2.82148	0.644863	4	GGCCCATCGACAGAGTGCCA;CCCAGGGTGAGACAGCACTT;TGACAGCGCCCTGATAGAGT;GCCAAGACAGAGGCACTAAG	-3.75;-3.38;-2.61;-1.55	10913;17853;34445;51770	4.47E-01;7.24E-01;7.09E-01;7.00E-01	25672;42982;59591;66534	4.02E-01;4.37E-01;3.77E-01;2.64E-01
SIDT1	-1.39305	0.897453	5	TTTCGATCATGTCTACAGCG;AGTTTGTACTGAGCACCCAG;GCCGAGGCGGGCAGATCACG;CAGCGCGTAAAACACAGCAA;TCTGCTGGCGAACCACAACA	-2.3;-2.08;-1.91;-0.7;0.02	39928;43499;46089;63979;70997	8.48E-01;5.76E-01;4.62E-01;3.93E-01;1.89E-01	6445;13463;31359;33943;37514	5.32E-01;7.68E-01;6.29E-01;9.84E-01;1.57E+00
SIDT2	-2.5338	0.786044	4	CCATACTGTGACCCGCAACA;GGAAGGACAAGCGTGTTCTG;AAAATGTACCTTCTGCGAAG;TGTAGGTACTCGGCCCCGAG	-4.96;-2.22;-1.71;-1.25	361;41230;49136;56382	1.74E+00;4.30E-01;4.28E-01;5.51E-01	21060;28306;36212;77081	3.77E-01;4.91E-01;6.62E-01;8.09E-03
SAGE1	-2.24646	0.451055	4	ACAGTTGACAAGTCATAACT;TCTGTCATATTAATACGCCG;GTTGCCAAATAAGCAAGCCC;TTCCTGTTTGTCTAACCACG	-4.22;-2.86;-1.69;-0.22	4671;29308;49552;68876	6.99E-01;4.79E-01;4.23E-01;2.04E-01	8566;27890;48149;72771	5.07E-01;4.97E-01;4.39E-01;1.08E-01
UFD1	-1.42787	0.776502	4	GAAAAAGATACACGGCTTTG;AGAGAAGCAGCGGTACTGTG;TCGGACCGCATGACGCATTG;GATGGCAATCACATCCCCGG	-3.17;-1.36;-0.66;-0.52	22398;54665;64454;65977	3.81E-01;5.87E-01;4.13E-01;2.78E-01	11467;12988;22777;55016	4.36E-01;9.32E-01;1.14E+00;5.94E-01
AAGAB	-2.61444	0.605316	5	CAAGAATGGTGCATCAAACA;AGCAGACATCAATCTATGTG;GCCATGAGGAGACACTATCA;GCCGAGGCGGGCAGATCACG;CACTACATTGGACCACACAT	-3.58;-3.37;-2.94;-1.91;-1.28	13961;18151;27640;46089;55919	3.90E-01;6.08E-01;7.26E-01;5.95E-01;7.07E-01	21523;31359;49802;59291;63497	4.23E-01;4.62E-01;4.70E-01;3.95E-01;4.31E-01
C4orf19	-1.65888	0.66263	5	TGCAGAAAAATGACCCTCAG;GCCGAGGCGGGCAGATCACG;GTGTGCTGCTGGCCTCAGAA;CCAGATTACCTTCAGCATTG;TTCATTGACATAGCCAGGAG	-4.22;-1.91;-1.71;-0.66;0.21	4673;46089;49178;64373;72113	6.29E-01;6.29E-01;4.67E-01;3.95E-01;1.55E-01	5329;13069;28264;31359;72769	5.87E-01;7.86E-01;7.08E-01;1.10E+00;1.35E-01
SLC7A6OS	-1.69998	0.582314	4	AGGAGTCCGAGTACACGCCG;CAGACACAGTCAATCGCTCA;GTCAGCGGCACAGAAGACGT;CCGAGGCGCGGAGATTACGG	-4.22;-1.77;-1.75;0.94	4675;48262;48533;74452	6.98E-01;4.80E-01;4.35E-01;6.84E-02	2990;28909;29180;72767	8.63E-01;4.84E-01;8.75E-01;1.08E-01
C4orf17	-2.01888	0.483889	4	ATGAGTTAACAGGTTTATCT;CTGGCGACATTCCTCTTACA;TTGGAATGTTATTCAAGCCT;AATGCATTTGGAACATTGTG	-3.5;-3.07;-1.08;-0.43	15417;24780;58826;66956	3.88E-01;5.47E-01;3.75E-01;2.53E-01	10486;18616;52649;62028	4.56E-01;6.99E-01;3.95E-01;3.86E-01
RFPL4AL1	-1.50404	0.632427	6	TCTGGCTCAAATCCCCACTT;AGGAATCTGTCAACCGACAG;GAAGCCGTGCAACTGAAATG;GGAGTGAATTGAGGCACTGG;GTGGGGATTTGAGCCAGAAT;AGTGGATATGACCTTCGATG	-3.93;-3.22;-2.39;-1.67;-1.05;3.24	8201;21302;38385;49801;59303;76651	4.40E-01;5.04E-01;5.05E-01;4.86E-01;4.32E-01;2.67E-02	791;18139;27641;39057;56138;69247	1.23E+00;5.48E-01;6.16E-01;6.23E-01;4.81E-01;2.91E-01
ETV3L	-2.75401	0.635432	4	AGACCTCTGGGGATAAGAAG;GGCGCCCGCACTTCCCACAA;TTTGTAGGCCCAATCAGGGA;GCCCGTGGGTGTGCAGAGTG	-4.19;-3.43;-2.04;-1.36	4917;16865;44170;54650	6.81E-01;7.59E-01;4.96E-01;6.06E-01	22792;33272;60592;72525	3.83E-01;4.43E-01;3.80E-01;1.14E-01
TEN1-CDK3	-2.21042	0.59987	9	CTCCCTGTACATCGTCCTCG;GTGGAAGGGCTCCACCAACT;TCAGTCCAGAGTAACACTGA;GACCTATTACCTCCCCTGGG;TGGACGTGGTGCACAACGAG;GGTGGATGACCCGATGTGAG;GGAATCTCACTCTGTCACCC;TCATGGGTGTAGGTGCGCAG;GCTGCCCAAGAGAATCTCGG	-3.79;-3.43;-3.27;-3.1;-3.09;-2.15;-1.53;-1.11;1.58	10254;16805;20245;24021;24219;42318;52067;58430;75399	4.17E-01;5.14E-01;6.13E-01;7.39E-01;1.08E+00;6.81E-01;6.20E-01;6.34E-01;1.04E-01	2043;19012;25378;35124;53216;53435;57189;60631;67174	7.17E-01;5.20E-01;5.64E-01;5.85E-01;7.33E-01;5.69E-01;5.30E-01;5.59E-01;5.56E-01
LOC105369743	-0.533336	0.82455	1	CAAGGCAGGCAGATCACCTG	-0.53	65843	0.0705	11599	0.825
MKRN2OS	-1.16437	1.05941	5	TGGAAGACTTCTCCACCTCG;GTGTATAATTACAGTGCACA;TCGCCCAAGCTAGAGTGCAG;TGTAGATGTATTTCTCACAG;TCCTCCTCAGACCAACTCAG	-2.24;-1.61;-1.41;-0.3;-0.27	40861;50875;53961;68139;68430	8.82E-01;7.59E-01;5.07E-01;4.44E-01;2.69E-01	9012;9303;23475;26567;36581	4.50E-01;1.01E+00;8.69E-01;1.34E+00;1.63E+00
MDC1-AS1	-2.60049	0.642577	4	CCCACATATCAGGCTACTAG;AGAGGACATGCCCCAACGTG;GTGGCATCTTGCAATTCAGG;AATGATACAAAAGTCAAGAG	-3.93;-3.91;-1.79;-0.78	8207;8388;48033;62989	5.19E-01;1.25E+00;4.41E-01;3.59E-01	14453;29410;69049;69235	3.96E-01;4.78E-01;5.12E-01;1.95E-01
GPR17	-3.05276	0.8463	4	CACAATGGCCAGGAAACGGT;AAGTTGGTGATCAGACCTGG;GCTGCAGGCAGACCACCGTG;CAGATGCATCAGGAACACGT	-3.42;-3.21;-2.86;-2.72	17015;21468;29380;32287	3.79E-01;6.18E-01;8.68E-01;1.52E+00	45147;48030;55953;60434	7.72E-01;4.78E-01;3.78E-01;4.31E-01
MRPS31P4	-1.91411	0.392609	1	GCCGAGGCGGGCAGATCACG	-1.91	46089	0.225	31359	0.393
ZNF117	-2.43086	0.563147	5	ACATAATATAATTCATACTG;ACATTCATAACGTTTCTCTC;AAAGAAACCCTACAAATGTG;GTTGAGTGTAAACAGCACAA;CTTATGTCTAATAAGGTGTG	-3.82;-3.8;-2.7;-1.1;-0.73	9854;10126;32541;58583;63502	4.33E-01;9.50E-01;6.03E-01;3.99E-01;4.31E-01	13940;18859;44882;67316;67601	3.90E-01;5.91E-01;4.63E-01;4.28E-01;2.95E-01
ZNF114	-1.72274	0.626983	6	CTTATGGAATCTCCCTGTGA;ACGAAGACGATGGAGTCTTG;CCAAAACAGAGGAACCACAC;GCCGAGGCGGGCAGATCACG;CAAGGCAGGCAGATCACCTG;TACGTGATGAAATTGATACG	-3.62;-3.26;-2.1;-1.91;-0.53;1.09	13152;20414;43142;46089;65843;74746	3.96E-01;5.14E-01;5.22E-01;5.11E-01;3.99E-01;9.23E-02	2696;11599;31359;34308;57024;64290	7.57E-01;7.55E-01;5.53E-01;7.47E-01;4.65E-01;4.85E-01
ZNF112	-2.13849	0.493835	4	AAGTTCATAAGTGTTAAGAG;CATTGGAGAGAAACCACGTA;AATGTGATAAGGGATTCAGT;TCAGGAGTCAATTCAAACAG	-3.82;-3.7;-1.28;0.25	9872;11678;55822;72290	4.70E-01;1.01E+00;3.79E-01;1.20E-01	5152;21620;65748;67572	6.65E-01;6.14E-01;4.32E-01;2.37E-01
SEZ6L	-2.07111	0.584572	5	TCATCGAATGCATCAATGTG;GACCGTGGTGGTGATAATGG;GAGTGTGAACCTGTCCGATG;GCCAGGATGACGGTTCACAG;TCCTGCCTCAGCCTCCCGAG	-2.97;-2.87;-2.14;-1.98;-0.4	26967;29175;42480;45069;67218	5.03E-01;4.64E-01;4.73E-01;6.20E-01;3.07E-01	10224;32364;34962;48293;50458	4.26E-01;4.63E-01;5.58E-01;5.46E-01;9.30E-01
PRKAR2A	-1.13831	0.985482	7	ACTCGTCTATTAAATCTGCT;TTTGACTATCCTTTCAAACA;GCCGAGGCGGGCAGATCACG;GGAATCTCACTCTGTCACCC;GTTGGTCAATATGACAACCG;CAAGGCAGGCAGATCACCTG;GCGAATTCGACGAGGTCAGG	-3.77;-1.99;-1.91;-1.53;-0.6;-0.53;2.37	10563;44858;46089;52067;65108;65843;76135	4.02E-01;1.03E+00;7.03E-01;5.99E-01;6.50E-01;4.02E-01;5.17E-02	1307;11599;12334;25378;31359;32584;66889	9.72E-01;6.79E-01;1.15E+00;9.11E-01;1.09E+00;1.65E+00;4.45E-01
PRKAR2B	-2.0973	0.681659	5	TGAAAAATTGGTCAAAGATG;GCCGAGGCGGGCAGATCACG;GCGGACGCAGGGGCGTTCAA;TCAAAGAAATAGGTTGCAAG;TTGGTAACTATGATAATCGT	-4.77;-1.91;-1.52;-1.15;-1.14	886;46089;52197;57926;58065	1.26E+00;6.29E-01;4.88E-01;4.04E-01;6.25E-01	19377;19516;25245;31359;76556	4.03E-01;5.75E-01;8.03E-01;1.10E+00;2.50E-02
MAGT1	-0.519359	1.31356	5	GAGCGAACATGGCAGCGCGT;GTGGGGCTTTCACAAGGCGA;CAAGGCAGGCAGATCACCTG;AAGGGGACCAGCATAATTTG;ATACATATGAGTTACAGGTG	-2.47;-2.19;-0.53;0.48;2.12	36956;41618;65843;73182;75923	7.49E-01;5.44E-01;8.61E-01;6.59E-01;4.30E-02	1519;4260;11599;35825;40502	1.04E+00;1.59E+00;1.61E+00;9.10E-01;1.41E+00
S1PR4	-1.52779	0.684019	4	TGTAGTGCAGAACAATGAGC;AGCCGCGTCTACGGCTTCAT;TGAAGAGCAGGCCCTCCCGT;CGGCCATCACCAGCCACATG	-3.64;-2.85;-0.27;0.64	12868;29650;68429;73703	4.14E-01;4.75E-01;4.93E-01;8.59E-02	3739;9013;47777;64562	7.79E-01;1.20E+00;4.44E-01;3.16E-01
ITGA2B	-2.00486	0.554747	5	TCCACAAGGACAGCCATGGG;GGCTGTCACTGACGTCAACG;ATGTCTATAGACCTGATCGT;CAAGGCAGGCAGATCACCTG;GGCCGTGGGCGAGTTCGACG	-3.85;-3.71;-1.53;-0.53;-0.41	9363;11558;52118;65843;67135	4.42E-01;8.63E-01;4.87E-01;4.07E-01;3.10E-01	10307;11599;25324;65879;68069	4.25E-01;8.61E-01;8.00E-01;4.08E-01;2.80E-01
LOC105371131	-1.80522	0.974017	17	AGAGTTGCGGCGGCGAGCAG;ATAAAGTTGTCATTACCCTC;CCAAAGGTAAACTATCCAGA;CATGCCCATGCGAGTACCTG;TTTGGCCCTACAGGTCAGAA;GGAGTGAGCACACACTCGGG;CCATACCTTCCTGTCTACGG;GCAATAATGACATGTAACCA;TGTCAGAGGCAGAGGAAAAT;TCCAACCGCCGTAGACAGGA;GAGCCATACCTTCCTGTCTA;AAGTTAGTATACTCACCCAA;TGTCTTGAGATCATCCGCTG;TCATACCCAAGCAGAGTGCC;TCCTGCCTCAGCCTCCCGAG;AGATTATCATCCGCTCAGGG;AAAGTTTCAGCTGTGAGGTA	-4.94;-3.54;-3.3;-2.86;-2.4;-2.0;-2.0;-1.91;-1.8;-1.68;-1.5;-1.18;-0.87;-0.52;-0.4;-0.11;0.32	394;14658;19698;29387;38264;44711;44746;46104;47837;49690;52483;57341;61849;65951;67218;69715;72572	1.10E+00;6.79E-01;7.36E-01;1.00E+00;1.29E+00;1.45E+00;1.12E+00;9.52E-01;8.38E-01;7.58E-01;7.16E-01;7.03E-01;6.77E-01;6.30E-01;5.47E-01;5.01E-01;4.79E-01	4870;7727;10224;11491;15593;20101;24959;27752;29608;31338;32696;32717;39175;48028;57742;62766;77048	4.22E-01;5.53E-01;6.66E-01;8.45E-01;8.60E-01;8.58E-01;8.43E-01;9.14E-01;1.05E+00;1.22E+00;1.46E+00;1.89E+00;1.70E+00;1.33E+00;9.68E-01;9.52E-01;3.76E-02
PHACTR4	-1.86178	0.61305	6	ATGGCCATACCACCCCCATA;GGTAGCAGTAGTGTTAGTGC;GCCGAGGCGGGCAGATCACG;ACCATCCTTAGATCTACACC;CAAGGCAGGCAGATCACCTG;ACTGCATATTCGAATCCAGC	-4.99;-2.83;-1.91;-1.63;-0.53;0.73	313;29907;46089;50528;65843;73941	1.62E+00;4.98E-01;5.53E-01;4.84E-01;3.99E-01;1.21E-01	3501;11599;26914;31359;47535;77129	6.67E-01;7.55E-01;6.32E-01;8.45E-01;6.95E-01;1.05E-02
PHACTR1	-1.8956	0.614854	7	ACTCTCTATATCCAATGAAG;CCGGTCTATATCATCCTCCG;TGGAGCACCTCATATGAGCA;GGAATCTCACTCTGTCACCC;AGACGAGCTCAACAAAACGC;CAAGGCAGGCAGATCACCTG;GAGAGTTACTTGCACCCAAG	-4.36;-3.18;-2.58;-1.53;-0.91;-0.53;-0.18	3342;22327;34897;52067;61326;65843;69163	6.35E-01;4.97E-01;5.35E-01;5.99E-01;5.48E-01;4.02E-01;3.44E-01	8279;11599;16116;25378;42545;55113;74091	4.20E-01;6.79E-01;9.06E-01;9.11E-01;6.71E-01;5.81E-01;1.34E-01
NLGN3	-0.1708	1.38514	4	TCTTCGGCAAAAGAGTGCCA;GACCCGCCGTAAAACACTGG;AGTGATGTGACAACGTGAGG;GGACTTAGCGGATAATGACG	-1.47;-1.34;-0.28;2.42	52934;54869;68306;76160	1.06E+00;5.92E-01;4.90E-01;2.90E-02	1282;9136;22573;24508	1.20E+00;1.19E+00;1.15E+00;2.00E+00
PHACTR3	-2.15743	0.460578	5	GCTCTCCCAAGCCTTAGCTG;AGTACCTGCATCGTCCAAGT;CAGATCGGGGTCCTCCATCG;AGATATTCAGGACGCGCCGG;TCCTGCCTCAGCCTCCCGAG	-4.13;-2.73;-2.5;-1.03;-0.4	5623;32147;36454;59565;67218	5.71E-01;4.62E-01;5.34E-01;3.94E-01;3.07E-01	10224;17877;40988;45310;71819	4.26E-01;6.15E-01;4.83E-01;6.14E-01;1.64E-01
NUP107	-2.51964	0.707839	5	ATAGTGAGTCGAGCAACACC;CGGCAGCTGACTTCTTACGT;TAATCTGGATGACAGTAACT;CATGACCCTAATGTTAATGG;GCCGAGGCGGGCAGATCACG	-2.97;-2.65;-2.54;-2.52;-1.91	26944;33560;35642;36168;46089	5.02E-01;4.66E-01;5.47E-01;8.97E-01;1.13E+00	31359;41260;41817;43866;50514	5.95E-01;5.38E-01;4.77E-01;6.51E-01;9.28E-01
KRTAP2-3	-1.75957	0.933553	15	ACCACAGCCGTGCACGACGA;GTAGCTCAGGGAGGACAAGG;AGCGGGGCACGCAGGTCACG;AGGGGTCGCAGCACACCGGG;AGGGGCAGCAGGTGATGGGG;AGCCTTCCTGCAGGGAGCAG;CACCACAGCCGTGCACGACG;GGTCGCAGCACACCGGGCGG;GCCTCCCCCGTAGCTCAGGG;CTTGTCCTCCCTGAGCTACG;CCACAGCCGTGCACGACGAG;GCAGGTCACGGGGCGGCACA;CAGATGGGGCGCGTGCAGCG;GGGGCACGCAGGTCACGGGG;GAGCAGGGGTCGCAGCACAC	-4.75;-4.14;-4.01;-3.98;-3.03;-1.95;-1.69;-1.55;-1.33;-1.03;-0.48;-0.23;-0.2;0.08;1.91	980;5497;7123;7423;25633;45504;49570;51737;55013;59560;66432;68753;68982;71346;75732	7.99E-01;6.92E-01;9.54E-01;1.42E+00;6.69E-01;1.15E+00;1.10E+00;9.46E-01;8.66E-01;8.45E-01;9.86E-01;8.12E-01;5.55E-01;4.26E-01;1.45E-01	1710;6096;8460;8689;11010;17882;22429;25696;27872;31938;51835;70013;70312;71947;76460	6.16E-01;6.50E-01;8.30E-01;1.23E+00;1.42E+00;1.15E+00;1.15E+00;1.25E+00;1.46E+00;1.52E+00;7.05E-01;9.22E-01;5.96E-01;4.20E-01;8.31E-02
KRTAP2-2	-1.51558	1.12935	14	ACCACAGCCGTGCACGACGA;AGCGGGGCACGCAGGTCACG;AGGGGTCGCAGCACACCGGG;AGGGGCAGCAGGTGATGGGG;AGCCTTCCTGCAGGGAGCAG;CACCACAGCCGTGCACGACG;GGTCGCAGCACACCGGGCGG;GCCTCCCCCGTAGCTCAGGG;CCACAGCCGTGCACGACGAG;GCAGGTCACGGGGCGGCACA;CAGATGGGGCGCGTGCAGCG;CTTCTCCTCCCTGAGCTACG;GGGGCACGCAGGTCACGGGG;GAGCAGGGGTCGCAGCACAC	-4.75;-4.01;-3.98;-3.03;-1.95;-1.69;-1.55;-1.33;-0.48;-0.23;-0.2;0.0;0.08;1.91	980;7123;7423;25633;45504;49570;51737;55013;66432;68753;68982;70861;71346;75732	8.23E-01;6.16E-01;9.75E-01;6.66E-01;1.32E+00;1.24E+00;1.04E+00;9.40E-01;1.53E+00;1.32E+00;8.76E-01;6.45E-01;4.21E-01;1.36E-01	1710;6096;6581;8460;8689;11010;22429;25696;27872;31938;51835;70013;70312;76460	6.36E-01;6.76E-01;1.08E+00;1.35E+00;1.91E+00;2.14E+00;1.27E+00;1.41E+00;1.66E+00;1.77E+00;7.99E-01;6.03E-01;4.35E-01;7.75E-02
KRTAP2-1	-1.51558	1.12935	14	ACCACAGCCGTGCACGACGA;AGCGGGGCACGCAGGTCACG;AGGGGTCGCAGCACACCGGG;AGGGGCAGCAGGTGATGGGG;AGCCTTCCTGCAGGGAGCAG;CACCACAGCCGTGCACGACG;GGTCGCAGCACACCGGGCGG;GCCTCCCCCGTAGCTCAGGG;CCACAGCCGTGCACGACGAG;GCAGGTCACGGGGCGGCACA;CAGATGGGGCGCGTGCAGCG;CTTCTCCTCCCTGAGCTACG;GGGGCACGCAGGTCACGGGG;GAGCAGGGGTCGCAGCACAC	-4.75;-4.01;-3.98;-3.03;-1.95;-1.69;-1.55;-1.33;-0.48;-0.23;-0.2;0.0;0.08;1.91	980;7123;7423;25633;45504;49570;51737;55013;66432;68753;68982;70861;71346;75732	8.23E-01;6.16E-01;9.75E-01;6.66E-01;1.32E+00;1.24E+00;1.04E+00;9.40E-01;1.53E+00;1.32E+00;8.76E-01;6.45E-01;4.21E-01;1.36E-01	1710;6096;6581;8460;8689;11010;22429;25696;27872;31938;51835;70013;70312;76460	6.36E-01;6.76E-01;1.08E+00;1.35E+00;1.91E+00;2.14E+00;1.27E+00;1.41E+00;1.66E+00;1.77E+00;7.99E-01;6.03E-01;4.35E-01;7.75E-02
KRTAP2-4	-1.75957	0.933553	15	ACCACAGCCGTGCACGACGA;GTAGCTCAGGGAGGACAAGG;AGCGGGGCACGCAGGTCACG;AGGGGTCGCAGCACACCGGG;AGGGGCAGCAGGTGATGGGG;AGCCTTCCTGCAGGGAGCAG;CACCACAGCCGTGCACGACG;GGTCGCAGCACACCGGGCGG;GCCTCCCCCGTAGCTCAGGG;CTTGTCCTCCCTGAGCTACG;CCACAGCCGTGCACGACGAG;GCAGGTCACGGGGCGGCACA;CAGATGGGGCGCGTGCAGCG;GGGGCACGCAGGTCACGGGG;GAGCAGGGGTCGCAGCACAC	-4.75;-4.14;-4.01;-3.98;-3.03;-1.95;-1.69;-1.55;-1.33;-1.03;-0.48;-0.23;-0.2;0.08;1.91	980;5497;7123;7423;25633;45504;49570;51737;55013;59560;66432;68753;68982;71346;75732	7.99E-01;6.92E-01;9.54E-01;1.42E+00;6.69E-01;1.15E+00;1.10E+00;9.46E-01;8.66E-01;8.45E-01;9.86E-01;8.12E-01;5.55E-01;4.26E-01;1.45E-01	1710;6096;8460;8689;11010;17882;22429;25696;27872;31938;51835;70013;70312;71947;76460	6.16E-01;6.50E-01;8.30E-01;1.23E+00;1.42E+00;1.15E+00;1.15E+00;1.25E+00;1.46E+00;1.52E+00;7.05E-01;9.22E-01;5.96E-01;4.20E-01;8.31E-02
LOC390956	-2.0131	0.579039	3	CCAGGGTTTATGTGTCAGGG;GCTCTGAGCACTGGAGAGAA;CCACCCTGACACATAAACCC	-2.44;-1.95;-1.64	37483;45474;50346	4.13E-01;3.70E-01;5.61E-01	27095;31980;39969	3.53E-01;5.22E-01;8.62E-01
LOC101928034	-1.51597	0.859088	4	TTCCTGGAAGGTGCACACGA;TGCACCTTCCAGGAATACGC;CAAATACAAGCTCTGCCAGG;GAGTGTTCTGGACACCAACA	-2.16;-1.46;-1.24;-1.19	42069;53057;56513;57175	6.84E-01;5.54E-01;3.77E-01;5.27E-01	20267;20929;24385;35373	3.75E-01;6.32E-01;1.07E+00;1.36E+00
LOC101928035	-0.533336	0.82455	1	CAAGGCAGGCAGATCACCTG	-0.53	65843	0.0705	11599	0.825
VMP1	-1.64841	0.74515	6	ATGGCATCGTCAAAGCATTG;GATTGCTGTACCGATACCCT;GCCGAGGCGGGCAGATCACG;AATTCCTAAGCCTATCCAGT;CAAGGCAGGCAGATCACCTG;AATGTAACTGAGGCTATATG	-4.25;-2.46;-1.91;-0.6;-0.53;-0.13	4379;37081;46089;65060;65843;69567	5.96E-01;5.96E-01;5.53E-01;7.19E-01;3.99E-01;2.79E-01	7875;11599;12382;31359;40348;73066	4.47E-01;7.55E-01;1.31E+00;8.45E-01;9.57E-01;1.52E-01
PPIAP8	-1.8189	0.808704	5	CCAGGGTTTATGTGTCAGGG;GCTCTGAGCACTGGAGAGAA;AGGTTCTGGCATCTTGTCCA;CCACCCTGACACATAAACCC;GCCAAGACTGAGTGGTTGGA	-2.44;-1.95;-1.85;-1.64;-1.21	37483;45474;47130;50346;56987	7.66E-01;6.15E-01;4.62E-01;5.05E-01;6.66E-01	20457;27095;30318;31980;39969	4.12E-01;4.73E-01;6.53E-01;1.07E+00;1.44E+00
PPIAP9	-2.14481	0.660435	7	GGTGACTTCACACGCCATAA;AACTTTCGTGCTCTGAGCAC;CCAGGGTTTATGTGTCAGGG;GCTCTGAGCACTGGAGAGAA;CCACCCTGACACATAAACCC;TTCACACGCCATAATGGCAC;GCCAAGACTGAGTGGTTGGA	-3.32;-2.99;-2.44;-1.95;-1.64;-1.46;-1.21	19277;26583;37483;45474;50346;53089;56987	5.05E-01;5.20E-01;5.51E-01;5.34E-01;5.25E-01;6.41E-01;9.32E-01	20457;24358;27095;31980;39969;50878;58151	5.32E-01;5.02E-01;5.72E-01;6.86E-01;7.45E-01;7.14E-01;8.71E-01
PPIAP4	-1.76427	0.61708	3	CCAGGGTTTATGTGTCAGGG;CCACCCTGACACATAAACCC;GCCAAGACTGAGTGGTTGGA	-2.44;-1.64;-1.21	37483;50346;56987	4.13E-01;3.53E-01;4.00E-01	20457;27095;39969	3.67E-01;6.22E-01;8.62E-01
PPIAP6	-1.4457	0.867762	5	CCAGGGTTTATGTGTCAGGG;GAATTGTCCACAGTCAGCAA;CCACCCTGACACATAAACCC;GCCAAGACTGAGTGGTTGGA;AATGCTGGACCCAACACAAA	-2.44;-1.91;-1.64;-1.21;-0.03	37483;46134;50346;56987;70309	7.66E-01;6.30E-01;4.73E-01;4.12E-01;2.10E-01	7133;20457;27095;31297;39969	5.05E-01;5.56E-01;7.42E-01;1.10E+00;1.44E+00
PPIAP7	-1.20781	0.578129	1	GCCAAGACTGAGTGGTTGGA	-1.21	56987	0.133	20457	0.578
PPIAP1	-1.50517	0.754942	4	CCAGGGTTTATGTGTCAGGG;GAATTGTCCACAGTCAGCAA;CCACCCTGACACATAAACCC;AATGCTGGACCCAACACAAA	-2.44;-1.91;-1.64;-0.03	37483;46134;50346;70309	5.75E-01;4.58E-01;4.15E-01;1.68E-01	7133;27095;31297;39969	5.60E-01;5.08E-01;8.03E-01;1.15E+00
PPIAP2	-0.616728	0.966451	2	GCCAAGACTGAGTGGTTGGA;AATGCTGGACCCAACACAAA	-1.21;-0.03	56987;70309	4.10E-01;8.39E-02	7133;20457	7.77E-01;1.16E+00
PPIAP3	-0.616728	0.966451	2	GCCAAGACTGAGTGGTTGGA;AATGCTGGACCCAACACAAA	-1.21;-0.03	56987;70309	4.10E-01;8.39E-02	7133;20457	7.77E-01;1.16E+00
NR1D1	-2.3827	0.493678	4	GCTGGGTGGAATGCTCCCAA;GAGTCTACAAGTGGCCATGG;GTAGGTGAAGATCTCTCGAT;TTCTGGGGCTGCATACACGT	-3.21;-2.93;-2.73;-0.65	21491;27894;31966;64491	3.78E-01;4.97E-01;7.82E-01;3.18E-01	12951;45467;49548;55967	4.13E-01;4.53E-01;4.23E-01;5.64E-01
NR1D2	-2.83844	0.790199	4	AGTTACCTGTGCAACACTGG;CGCAAGCATGAACTCCATAG;TTCCTAAGCGTGAAAAACAG;TACTCTTTGAGTATAAGCAT	-4.78;-3.24;-2.89;-0.44	838;20925;28605;66863	1.38E+00;6.32E-01;8.96E-01;2.55E-01	10579;48857;56510;76604	4.54E-01;4.88E-01;3.77E-01;1.89E-02
PLPBP	-3.13931	0.839471	4	TTCAGAGACCATAGCCATCG;AGTCGGGTGCGCATTGCGGG;ATGGTCCAGATTAACACCAG;TGATCGAGGCCTATGGACAT	-4.15;-3.13;-3.05;-2.23	5357;23441;25240;41027	6.51E-01;5.73E-01;1.03E+00;1.10E+00	36415;52180;53982;72086	5.53E-01;5.38E-01;3.87E-01;1.24E-01
OGFR	-1.7394	0.556351	4	TGTGGGCCAGAGCATAGCAA;AGGAGTGATTGTCCTCAAGG;CCCCAGACGAACTTGCAGCG;CAGAAACTGGCGAGCCACGA	-3.59;-2.6;-1.18;0.41	13720;34554;57447;72931	4.04E-01;4.36E-01;3.75E-01;1.04E-01	4511;19995;42905;63705	7.11E-01;6.57E-01;5.18E-01;3.39E-01
RPS26P47	-1.78714	0.566821	3	CGTCATTCGAAACATAGTGG;TGCAGCGAATAGGCTGCACG;CTGTGCCCGATGCGTGCCCA	-2.99;-1.29;-1.09	26623;55790;58718	3.52E-01;3.61E-01;3.61E-01	18718;21652;50840	3.80E-01;7.72E-01;5.48E-01
LOC389842	-1.51654	0.487863	1	ACTCGTCGGCGAAGTCAGCG	-1.52	52259	0.171	25183	0.488
PTCH2	-2.31612	0.486165	5	CTGGCCTAGAAGGTCCCGTG;GATGGATGTGAGTACGACAC;CCGAGGCACCACATCCGTCA;GGAATCTCACTCTGTCACCC;TTGTCTCAATAATGGCCATG	-3.52;-2.95;-2.71;-1.53;-0.87	15066;27386;32420;52067;61777	3.88E-01;4.71E-01;6.06E-01;4.75E-01;4.91E-01	15665;25378;45017;50076;62390	3.88E-01;4.86E-01;4.63E-01;5.10E-01;4.69E-01
PTCH1	-2.88371	0.710313	4	AAATGTACGAGCACTTCAAG;AGCGGGAATTGGGATTAACG;AAGGTGTAATAATCAAACAA;TGATGTCGATGGGCTTATCG	-4.29;-3.57;-2.21;-1.46	3957;13966;41364;53138	7.58E-01;8.82E-01;5.47E-01;6.54E-01	24304;36092;63466;73485	3.92E-01;4.30E-01;4.01E-01;9.11E-02
TIMM44	-1.46936	0.723686	4	ATCTGATAGGTCGACCCATG;TATAAAAAAATTCCGTGACG;AGTGTTTGAGCCAAACGAGT;TCTCGGCCGGAAAATCAAGG	-3.32;-2.29;-0.26;0.0	19150;40014;68466;70660	3.75E-01;4.27E-01;4.94E-01;1.59E-01	6909;8976;37447;58298	5.69E-01;1.20E+00;6.32E-01;4.93E-01
RAD9B	-2.4698	0.54987	5	AGTTCTAATGAGGAATCAAT;TGATAATGCTGAAAAAACAC;ATACGCTAATGATTCAACCA;GCCGAGGCGGGCAGATCACG;TCTCAAGGACCTACTTCCCA	-3.66;-3.27;-2.22;-1.91;-1.29	12544;20155;41220;46089;55791	3.99E-01;5.62E-01;4.82E-01;5.95E-01;7.12E-01	21651;31359;36222;57272;64902	4.24E-01;4.62E-01;5.38E-01;4.09E-01;3.84E-01
RAD9A	-2.51411	0.505417	4	CCACTCCCTGTCCCGCATCG;GCGCTGTAAGATCCTGATGA;GTATTGCTGGAAGAAGAGCG;CCTGCGCAGCTACCACGAGG	-3.73;-2.99;-2.66;-0.67	11162;26552;33353;64289	4.42E-01;5.16E-01;7.40E-01;3.23E-01	13153;44089;50869;66284	4.10E-01;4.43E-01;4.10E-01;2.70E-01
ERGIC2	-3.05216	1.09344	4	GCCAAATGTGCATGACCACG;GCTCTCAGGAACCTTCGGAA;TTTCTATGCAGATGTTGGAG;TCTCAGTATATCAAGATACA	-4.68;-4.04;-3.48;0.0	1248;6653;15773;70626	1.21E+00;1.43E+00;1.57E+00;1.60E-01	6681;61654;70789;76194	5.80E-01;8.01E-01;5.81E-01;2.82E-02
ERGIC3	-2.21562	0.520834	4	AGATCACTCACCGTGCACAT;CGGGAGGCATATCGCCGTAG;CCTGCAGTGACCATTGTCAG;CTCTACGTGGACAAGTCGCG	-4.38;-3.36;-1.87;0.75	3206;18248;46752;73993	8.36E-01;7.11E-01;4.57E-01;7.91E-02	3449;30690;59210;74229	8.09E-01;4.64E-01;3.76E-01;7.36E-02
ERGIC1	-2.12773	0.515037	7	TCTTCATGGAGTTGTCGATG;TGGACACGTGGAAGTTGCCG;GGAGCTTTCAATGCTCTCGG;TACGCAGCCAACGTACACCG;TCGCCCAAGCTAGAGTGCAG;CAAGGCAGGCAGATCACCTG;TCCTGCCTCAGCCTCCCGAG	-4.1;-3.59;-2.7;-2.16;-1.41;-0.53;-0.4	5915;13782;32552;42150;53961;65843;67218	4.79E-01;6.03E-01;5.32E-01;5.37E-01;4.99E-01;4.02E-01;4.30E-01	10224;11599;23475;35304;44891;63672;71533	4.03E-01;6.79E-01;6.38E-01;6.13E-01;6.15E-01;4.15E-01;2.41E-01
B3GAT3	-2.61086	0.573076	4	CGATGACAACACCTACAGCC;CGAGCTGTACCAGCGCGTAG;CCAGAGCCCATACCTGGCAT;TTCCGCTGCTCGACACCACG	-4.06;-3.06;-2.91;-0.41	6485;24875;28226;67108	5.89E-01;5.45E-01;9.10E-01;2.49E-01	10334;49216;52545;70964	4.59E-01;4.92E-01;3.96E-01;1.52E-01
B3GAT2	-2.78904	0.63808	4	CGCCACCTGGCGGAACGTGT;CCGCGTAGGGAGAGAAGTAG;CCGGGCCGCTTGTAGCGCCG;GTCAGCGAAGAAGAGCACGC	-3.56;-3.16;-2.75;-1.69	14170;22753;31733;49533	3.99E-01;5.88E-01;7.89E-01;7.76E-01	27917;45722;54705;63279	4.24E-01;4.55E-01;3.83E-01;3.51E-01
B3GAT1	-2.62218	0.55843	4	CACCCTCGCACCCCTGCTCG;GTCTGACCGCGACATCGTGG;CCGCGCAGCTTGTAGTTGCG;TGTAGGTGGGCGTCACCACG	-3.55;-2.95;-2.69;-1.3	14477;27407;32829;55498	3.96E-01;5.03E-01;7.56E-01;5.79E-01	21944;44613;50035;62965	3.80E-01;4.46E-01;4.18E-01;3.59E-01
CALM3	-1.92804	0.519358	4	AGATGGCACTATCACCACCA;CCTGCAGCTCTGCTTCAGTG;TGCTTACCTTGTCAAAGACA;TCTTCCCCCAGAGTTCAAGG	-3.67;-1.84;-1.62;-0.58	12323;47190;50662;65334	4.22E-01;4.69E-01;4.12E-01;2.95E-01	12108;26767;30252;65106	4.25E-01;5.13E-01;8.38E-01;3.01E-01
TTC30B	-1.2994	0.86756	4	TCAGTGCTGAAGCATACTGT;GCTGCTATCAAGTACAGCGA;CTTGTATGGTAAGTTTCCGG;ACCGATGGCCAGATCAACCT	-2.23;-1.63;-1.06;-0.27	41019;50471;59134;68418	6.57E-01;5.10E-01;3.76E-01;2.15E-01	9024;18308;26971;36423	4.93E-01;7.09E-01;9.58E-01;1.31E+00
CALM1	-2.41264	0.55878	4	CTGACCGAAGAACAGATTGC;CCATCATAGTCAAAAATTCG;AGGAACTTGGAACTGTCATG;GGCATTCCGAGTCTTTGACA	-2.87;-2.79;-2.43;-1.57	29229;30915;37705;51486	4.39E-01;4.62E-01;6.25E-01;7.09E-01	25956;39737;46527;48236	4.05E-01;4.27E-01;4.61E-01;8.22E-01
GSDMA	-0.704787	1.06677	4	GAATATGCTGGACACCCGAG;GGAAGCGCTTGAAGTCGATG;CCCATAGGGGACGTACACGA;GGGATCCATAAATCACAAGG	-2.95;-2.41;0.51;2.02	27491;38145;73281;75832	4.19E-01;4.26E-01;7.40E-01;3.65E-02	1610;4161;39297;49975	1.11E+00;1.81E+00;5.89E-01;7.61E-01
GSDMB	-2.38933	0.47556	4	AAGGGTAGCCAGATACTGCT;GCTGCTTTACTCGATAGCTC;GGAATCTATCAGCATCAACA;TGGACACAGATGGGGACAAG	-3.38;-3.22;-2.42;-0.53	17839;21253;37921;65852	3.77E-01;6.24E-01;6.20E-01;2.82E-01	11590;39521;56165;59603	4.34E-01;4.26E-01;3.78E-01;4.55E-01
GSDMC	-1.2363	0.730751	4	CAAGTTCACATCCTCCCAGT;GAGAGGGGACAACCTGTACG;GGAGCATCCATGGTCCACAG;AAGGCGCTGACTCTTCAGAA	-2.97;-2.81;-1.5;2.33	26907;30478;52573;76103	4.13E-01;4.66E-01;3.96E-01;3.03E-02	1339;24869;46966;50558	1.18E+00;5.45E-01;4.55E-01;7.41E-01
GSDMD	-2.32308	0.465956	4	AGGTTGACACACTTATAACG;TGAGTGTGGACCCTAACACC;CCACGTACACGTTGTCCCCG;ACTGACCTGTCAGGAAGTTG	-3.57;-3.17;-1.47;-1.08	14050;22504;52980;58837	4.00E-01;5.93E-01;3.93E-01;4.77E-01	18605;24462;54954;63402	3.75E-01;5.53E-01;3.82E-01;3.47E-01
UPK1A	-2.10555	0.514821	4	CGAGAAGGGATCTCCAGTTG;CGCCCACCTCAATCATGACG;GATGCTGACCTTCTACAGCG;TCGCCGGGCTCACGTAGTCA	-3.17;-2.3;-1.92;-1.03	22549;39815;46050;59546	3.82E-01;4.27E-01;4.67E-01;4.56E-01	17896;31392;37627;54893	3.77E-01;4.58E-01;6.27E-01;5.98E-01
UPK1B	-1.5599	0.663583	4	TTGCGGCATTGCCCTGACTG;TGCTGACAGGACAATTGCTG;GCCCACAAATATGCCGATCC;CTCCAAACAATGATGACCAG	-3.09;-2.12;-1.0;-0.03	24264;42825;60036;70261	3.92E-01;4.36E-01;3.78E-01;1.69E-01	7181;17406;34617;53176	5.57E-01;7.40E-01;7.04E-01;6.53E-01
DLGAP2	-1.97006	0.538903	5	ACCAGGACAGCCGCGCACAG;TTGTTCGGAAACATCCCGGG;CGGGGAGTTGTAGTTCGCAG;TCTGCACGGAGTGTACCAGG;CAAGGCAGGCAGATCACCTG	-4.01;-2.59;-2.14;-0.57;-0.53	7013;34861;42436;65412;65843	5.09E-01;4.73E-01;4.73E-01;4.03E-01;3.52E-01	11599;12030;35006;42581;70431	4.07E-01;8.37E-01;5.57E-01;6.87E-01;2.06E-01
DLGAP3	-0.922491	0.961679	5	CACACACTACCATACCAGCG;GCCGAGGCGGGCAGATCACG;TGGGCGGTGATGGAGATGCG;GAAGTGGCGGCCGTCCATTG;CATACCATGATGGTCAGCCA	-3.01;-1.91;-1.09;-1.05;2.45	26139;46089;58665;59358;76186	4.88E-01;6.29E-01;5.93E-01;3.95E-01;3.55E-02	1256;18084;18777;31359;51284	1.12E+00;6.10E-01;1.09E+00;1.10E+00;8.95E-01
DLGAP1	-1.66704	0.827774	8	TAGGACTACTCACTTGAGTG;GCTCTGGATGGTCCTAACGG;TGGACAGGGTACACCCCACG;GCCGAGGCGGGCAGATCACG;GGAATCTCACTCTGTCACCC;CAAGGCAGGCAGATCACCTG;TCCTGCCTCAGCCTCCCGAG;GGTGGCTATGGTAGTCGTGG	-3.69;-2.91;-1.99;-1.91;-1.53;-0.53;-0.4;-0.37	11879;28348;44908;46089;52067;65843;67218;67477	4.17E-01;6.13E-01;8.45E-01;6.27E-01;5.68E-01;6.25E-01;4.07E-01;4.79E-01	9965;10224;11599;25378;31359;32543;49081;65558	4.06E-01;6.80E-01;1.08E+00;7.83E-01;8.91E-01;1.29E+00;9.20E-01;5.79E-01
DLGAP4	0.390146	1.94905	6	GGGTCTTCTTATACGCCACT;GCCGAGGCGGGCAGATCACG;CAAGGCAGGCAGATCACCTG;TAGGCGTGCATGAAGTAGCG;CGACCGCCCAGCGTGACACG;GACACCAACTACGTCAAACG	-3.06;-1.91;-0.53;0.78;2.55;4.52	24899;46089;65843;74087;76260;77168	5.57E-01;8.45E-01;1.38E+00;1.63E+00;1.07E+00;9.20E-03	274;1182;3355;11599;31359;52569	1.68E+00;2.48E+00;2.85E+00;2.26E+00;1.41E+00;1.01E+00
DLGAP5	-1.08816	1.14159	5	GATGATTGTGAATATAAACG;CAAACAGTTAGAGGACCCAA;CAGAGAGAGAAAGCTAAACG;CAAGGCAGGCAGATCACCTG;GATGTTCGAGCAATCCGACC	-2.37;-1.52;-0.65;-0.53;-0.36	38770;52129;64532;65843;67559	8.08E-01;8.01E-01;7.94E-01;4.07E-01;2.96E-01	9883;11599;12910;25313;38687	4.32E-01;8.61E-01;1.49E+00;1.42E+00;1.51E+00
FBXL14	-1.57574	0.710638	4	CTCTAAAGCACATCTCCCGA;CCGCCTACCACAAGTCGGTG;TGTGACAACATCAGTGACAC;CGATCTCCTGCACAAACGCG	-2.72;-1.78;-1.74;-0.07	32325;48120;48810;69989	4.81E-01;4.79E-01;4.31E-01;1.76E-01	7453;28633;29322;45100	5.46E-01;4.87E-01;8.70E-01;9.39E-01
OIP5	-1.93966	0.53967	4	CCACAAAAGTCCCCCCGGGG;GGACCTGTCGCGGTCCCTCG;TGGAGGTCGTAAAAGAAGCT;CCTTCAATGCCAACTAGGAA	-3.33;-2.32;-1.14;-0.96	18923;39543;57940;60583	3.75E-01;4.26E-01;3.75E-01;4.26E-01	16859;19502;37892;58541	3.80E-01;6.72E-01;6.21E-01;4.86E-01
FBXL19	-2.06942	0.44371	4	TGCAGATTGTACACTCCATG;CTGTGTGCGAACTGAGTGCG;AGAAGCTAGAGCGTTTCAAG;TCACCCTGGTAGGTGAAAGG	-4.21;-2.83;-1.63;0.39	4781;29869;50535;72878	6.90E-01;4.73E-01;4.13E-01;1.06E-01	4564;26907;47555;72666	7.07E-01;5.11E-01;4.47E-01;1.11E-01
INO80B-WBP1	-2.55434	0.683656	8	CAAACTCAAAATCAAGCTTG;CCACTTTGAAGGAACAAATG;TCATTATCCACAACCATAAG;CCTCCTGATAGGTCCCGAAG;TATTGGGATACCTGCTGTTG;AGGCGCAACAGCAGCTAAAG;TGAGAGTGGTCACTGCTGCG;GCGGCTGCTTACTGCTCGAC	-4.1;-3.38;-3.31;-2.44;-2.36;-2.14;-1.71;-1.0	5969;17828;19429;37538;38949;42540;49263;59985	4.54E-01;5.10E-01;6.81E-01;5.65E-01;6.55E-01;8.06E-01;9.11E-01;8.87E-01	17457;28179;34902;38493;39921;57990;59618;71474	5.20E-01;6.10E-01;5.91E-01;5.63E-01;6.35E-01;5.07E-01;5.30E-01;2.79E-01
PTPN18	-2.25091	0.430036	4	GCCACTCACGCTGAACTCGC;TGACCACATGCTCGCCATGG;GCAGTCGGCCAGAGAACGTG;TGTGCACCGTGGATTATGTG	-3.59;-2.59;-1.86;-0.96	13735;34676;46953;60582	4.03E-01;4.35E-01;4.55E-01;4.27E-01	16860;30489;42766;63723	3.80E-01;4.66E-01;5.21E-01;3.39E-01
PTPN13	-1.61095	0.927956	8	CAAACCGTTGCAGAGTTGGT;TTACTTACAAGAATAGACCG;GCCGAGGCGGGCAGATCACG;AAGGATCACCACTGGTCACG;GGAATCTCACTCTGTCACCC;TCACAATGGAGTGCGCACAT;CAAGGCAGGCAGATCACCTG;TCCTGCCTCAGCCTCCCGAG	-3.13;-2.68;-1.91;-1.56;-1.53;-1.14;-0.53;-0.4	23421;33037;46089;51556;52067;57982;65843;67218	7.11E-01;7.42E-01;8.91E-01;7.65E-01;5.68E-01;5.07E-01;4.15E-01;4.92E-01	10224;11599;19460;25378;25886;31359;44388;54038	4.07E-01;6.25E-01;6.80E-01;7.83E-01;1.16E+00;1.36E+00;1.16E+00;1.25E+00
PTPN12	-1.95879	0.592201	4	ATATAGTCTGAATCTTGTGA;TTTGTGCCATAGATTATACG;AAGAAGGTCCCTCTCCAAGA;GGCCTGCCGAGAATTTGAGA	-3.92;-3.38;-3.09;2.56	8317;17836;24193;76267	5.15E-01;7.25E-01;1.08E+00;2.65E-02	1175;53249;59606;69115	1.24E+00;5.58E-01;3.77E-01;1.98E-01
PTPN11	-0.34043	2.05665	6	GATTACTATGACCTGTATGG;CAAGGCAGGCAGATCACCTG;TTATAAGAAGAATCCTATGG;CTGACAGCGAATCATAACAT;AAATGTTACTGACCTTTCAG;GAGAATCGCTTGAATCCGGG	-1.67;-0.53;-0.29;-0.2;0.2;0.44	49942;65843;68217;69029;72038;73043	1.66E+00;2.26E+00;1.64E+00;9.52E-01;5.35E-01;1.52E-01	4399;5404;8413;9225;11599;27513	5.94E-01;1.26E+00;1.74E+00;2.63E+00;3.42E+00;2.70E+00
PTPN14	-0.395656	2.08235	9	TCAACAACCACGGGAAGCCG;GCCGAGGCGGGCAGATCACG;GCTGGCTCGGAAGAACCGAG;CAAGGCAGGCAGATCACCTG;TCCTGCCTCAGCCTCCCGAG;CAAGCCAGAGTTACCTTGCG;TGTGCTTACCGTGTGAAAGA;ATTACGATGTACATTGGACC;CATGACTGTCTCATAATCGG	-2.74;-1.91;-1.83;-0.53;-0.4;0.1;0.21;1.5;2.04	31858;46089;47457;65843;67218;71487;72069;75315;75845	1.27E+00;1.64E+00;1.19E+00;2.30E+00;1.72E+00;1.63E+00;9.80E-01;7.04E-01;8.14E-02	1597;2127;5373;5955;10224;11599;29976;31359;45568	8.04E-01;1.65E+00;1.74E+00;2.53E+00;2.54E+00;3.23E+00;1.75E+00;2.41E+00;2.07E+00
LYAR	-2.66461	0.59599	4	CTCCAAAGTGAAAGACGCCG;TCAGATCTGACTTACGCTGT;CTTCACTTATGCATTTCACG;GAAGCGCAAAAAGGGACAGG	-3.42;-3.24;-2.24;-1.76	17103;20828;40905;48453	3.79E-01;6.35E-01;5.56E-01;8.15E-01	28982;36537;56616;60341	4.36E-01;4.29E-01;3.76E-01;4.33E-01
C2orf81	-1.41484	0.872559	6	CCAACACCTAAGAGACCTCG;GTCCGCGGTAGGCTTCCAAG;AAAAGGACGGCACTGAGAAG;CATGACTCGAGCCAGCAAGT;TCCGCAGCTGAGAGTCACGT;AACGACAAATGGAAGCCGAG	-3.68;-2.26;-1.86;-0.46;-0.45;0.22	12050;40590;46995;66612;66739;72123	3.97E-01;6.75E-01;5.66E-01;7.94E-01;4.04E-01;1.85E-01	5319;10703;10830;30449;36839;65377	5.39E-01;8.01E-01;1.46E+00;8.79E-01;1.12E+00;4.41E-01
C2orf80	-1.35822	0.76809	4	ATTAGGAAAATACCACTCCA;ATTATATTGGCATCAGACTT;GGAAGTCTTTAAAATTTATG;AGGCAGAGAGATGAAACTCG	-3.4;-1.71;-0.38;0.06	17328;49271;67411;71223	3.78E-01;4.93E-01;4.66E-01;1.45E-01	6219;10031;28171;60091	6.02E-01;1.12E+00;9.12E-01;4.41E-01
C2orf83	-1.40147	0.721723	4	ACCACAGTCATCGTCACGAT;AACTTACCGTACAGACATGC;TGAATCATCAAGGCAATGAA;ATGACTGTGGTTGACAACCA	-3.57;-3.43;-0.4;1.8	14079;16814;67164;75623	4.00E-01;7.61E-01;4.61E-01;4.13E-02	1819;10278;60641;63347	1.06E+00;1.10E+00;3.80E-01;3.49E-01
C2orf82	-3.43255	1.18357	4	CACCGTCGCGCCAGGACCCG;GGCCGGCTCGTTCCACAGCG;CTTACCTGTGAGCACCGCAG;GCCGTCGGGAGAAGGCCCCG	-4.19;-3.88;-3.69;-1.97	4921;8907;11893;45184	6.80E-01;1.21E+00;1.91E+00;9.36E-01	32258;65539;68525;72521	4.80E-01;9.94E-01;4.96E-01;1.14E-01
C2orf88	-1.00283	1.31174	10	CAGAAGAGAGATGTCTACCT;AAACAACCTGAATCCAACTT;ATCACAGTATTGGTCCCTGG;TTTCCAGACGAAGTTTACTG;GGAATCTCACTCTGTCACCC;AGGGACCAATACTGTGATCT;AGGTGTGAAACGATCTGCAG;TGACGATTATCACGCTACAA;TTCTCACCTTCATATATGGT;TGATCAATCAGTTCCCGGAG	-3.36;-3.16;-2.63;-1.54;-1.53;-1.14;0.01;0.15;0.25;2.91	18236;22794;33946;51931;52067;57978;70950;71777;72332;76484	6.78E-01;6.20E-01;7.49E-01;1.27E+00;8.84E-01;8.31E-01;1.42E+00;8.82E-01;4.47E-01;5.40E-02	958;5110;5665;6492;19464;25378;25511;43496;54661;59208	9.56E-01;9.45E-01;1.56E+00;2.21E+00;1.23E+00;1.27E+00;1.82E+00;1.07E+00;8.93E-01;1.17E+00
LRRC37A10P	-1.17416	0.58881	1	CACTCCAGAACCCACTACGG	-1.17	57476	0.129	19960	0.589
MSMP	-2.46809	0.678435	4	TTTCCCCTCATAGTGACAGG;GCGGAGCCAAGACTCACCCA;CACGCCAACAGGATGCAGAC;CAGGCCAAGGGGATCCTAGG	-4.88;-2.82;-2.05;-0.12	545;30161;43983;69614	1.56E+00;4.69E-01;4.99E-01;1.85E-01	7828;33459;47299;76897	5.32E-01;4.42E-01;4.50E-01;1.22E-02
MZB1	-0.846791	1.22474	4	ACTTCATACCTCAAACTCTG;CACAGGCCCAGGACTTAGCG;TCTACACGGATGTCCTGGAC;CAGCTACGGAGTTCGAGAAG	-1.56;-0.93;-0.55;-0.35	51549;60973;65704;67708	1.00E+00;7.74E-01;4.31E-01;2.33E-01	9734;11738;16469;25893	4.74E-01;1.00E+00;1.52E+00;1.90E+00
TRAPPC6B	-3.06508	0.865156	4	CTCCAGACACCATCTCGTTA;GTCTGGAGTGTACAAGTCCG;GGTTTACAAAAGATACTGCA;GAAAACATGGGGTTTCGAGT	-4.69;-3.64;-2.61;-1.32	1227;12745;34383;55277	1.22E+00;9.45E-01;7.11E-01;5.86E-01	22165;43059;64714;76215	3.81E-01;4.37E-01;4.16E-01;2.77E-02
HLA-DQB1	-2.30222	0.525367	4	AGGTGACAGTTGCTACCCGA;GTGGTTTCGGAATGATCAGG;CGTTCCGCGGGATCTTGCAG;CGACGTGGGGGTGTACCGCG	-3.56;-2.05;-1.86;-1.74	14284;44040;46872;48709	3.98E-01;4.43E-01;4.56E-01;8.05E-01	28733;30570;33407;63142	4.33E-01;4.65E-01;7.39E-01;3.55E-01
MSMB	-2.10654	0.463432	4	TTAGAATGCATGGATCTCAA;ATTGCATAAAGTCACGAAGG;GAGTTCCAGGAGATTCAACC;AACACCCAATAAACTCGGAG	-3.98;-2.24;-1.2;-1.0	7397;40938;57077;60000	5.49E-01;4.29E-01;3.76E-01;4.43E-01	17442;20365;36510;70046	3.78E-01;6.47E-01;6.55E-01;1.74E-01
HLA-DQB2	-1.81024	0.579763	4	CAGATACATCTATAACCGCG;CGAGCTGGGGCGGAGCATCG;TCTGCACACCTTGTCCACCG;AGCTGCGCACGACCTTGCAG	-3.06;-2.27;-1.69;-0.22	24951;40375;49537;68829	3.96E-01;4.28E-01;4.23E-01;2.05E-01	8613;27905;37055;52474	5.05E-01;4.97E-01;6.41E-01;6.76E-01
HSPE1P11	-2.07955	0.358208	1	GCTGCTGAAACTGTAACCAA	-2.08	43485	0.251	33944	0.358
LOC105376886	1.7464	1.61853	1	CTTGGAACCTACCCTCAAAG	1.75	75578	0.0106	1864	1.62
EIF4E1B	-2.5659	0.624951	4	AGGACTTTGCTGTCTCTGAG;TGAGGGTGGAATCCGAGAGT;ACAGCCGGTCCAGCTCAATG;GACAGCAGGAATAAACGGGG	-4.4;-3.63;-1.67;-0.56	3056;12947;49855;65488	8.54E-01;9.34E-01;4.20E-01;2.91E-01	11954;27587;64506;74386	4.28E-01;5.01E-01;4.13E-01;6.99E-02
FOXS1	-0.347801	1.08202	4	CCCAAGGGCCTAAGCTTTGG;CGAATCGGCCCATGATGTAG;GGCACGCCGTGGACCCCTCA;TGCCACGACATGTTTGAGCA	-2.53;-1.6;-1.32;4.05	35957;51012;55271;77014	5.44E-01;5.18E-01;3.81E-01;9.61E-03	428;22171;26430;41485	1.66E+00;6.01E-01;9.80E-01;1.08E+00
HAPLN4	-1.59039	0.663394	4	CGGGTATCGCCATAACGCCG;GCCTAGTGCCACGAAGACGT;AGTCTTGCAGCGTGACGTTG;AGACGATGGTGCCACCACGG	-3.83;-2.05;-0.31;-0.17	9646;44030;68028;69237	4.76E-01;4.42E-01;4.82E-01;1.95E-01	8205;9414;33402;67786	5.19E-01;1.16E+00;7.39E-01;2.31E-01
CAMKK2	-2.76194	0.725034	5	TGGAAGGTTTGATGTCACGG;TGTTCGAACTGGTCAACCAA;ACGTGGTGAGACTCCACTGT;GAGACAGCTTGCGACCGGAG;TCCTGCCTCAGCCTCCCGAG	-4.33;-3.92;-3.13;-2.02;-0.4	3646;8242;23305;44383;67218	7.12E-01;1.09E+00;8.76E-01;6.38E-01;3.07E-01	10224;33076;54157;69205;73796	4.26E-01;4.65E-01;5.10E-01;4.70E-01;1.05E-01
CAMKK1	-3.90311	1.83203	4	AGGCTGGGCCTTATGCCACG;GGCCAGCCTCACCACACCGT;TCAGTTTGACCACATTCACG;AGAGCCTACTAGAAACGGTG	-4.8;-4.48;-3.97;-2.37	782;2426;7642;38748	1.41E+00;2.26E+00;2.46E+00;1.20E+00	38694;69800;75014;76660	6.01E-01;1.32E+00;9.43E-01;1.76E-02
MYDGF	-2.21719	0.657972	4	CGACGGTGGCGTTTGACGTG;TACAGATAGGACTTCCCCTG;TCACTTACGCCTCTCAAGGA;CATTCCTTCTCCCATAACGT	-2.57;-2.23;-2.06;-2.0	35075;40983;43753;44776	5.28E-01;4.29E-01;5.03E-01;9.52E-01	32652;33689;36447;42347	4.86E-01;4.41E-01;6.56E-01;1.05E+00
LOC105377286	-1.78919	0.783939	12	GTAGAGCGCTAAGGGATGTG;TCATCGTGTGGAGCGCATCA;AGATTCAGGTAGAGCGCTAA;GTCACCAGACCAGTGCAAGG;GGAATCGCAGCTCCCCCAAG;TGAGTCACCAGACCAGTGCA;GAGGCAGATCAAGCTGCTCA;TCACGGTCCCAGGTAGACTT;CTAAACCAGGGAATGGACAA;CAACTGCCGGCTGTGCAGAG;CCTAGAGTTACTGGTCTCAG;TCAGGACCGGGTTGACCACG	-3.88;-3.53;-3.41;-2.64;-2.2;-2.12;-1.49;-1.01;-1.0;-0.95;-0.03;0.8	8888;14763;17170;33838;41457;42890;52691;59876;60049;60705;70254;74137	4.43E-01;5.39E-01;6.00E-01;7.39E-01;7.88E-01;6.77E-01;7.49E-01;7.76E-01;5.98E-01;5.69E-01;4.19E-01;2.27E-01	3305;7188;16737;17393;17566;24751;34552;35982;43604;60286;62674;68559	4.99E-01;6.68E-01;6.05E-01;7.84E-01;1.10E+00;1.01E+00;8.38E-01;1.05E+00;9.81E-01;5.77E-01;6.51E-01;6.35E-01
CHMP3	-3.74699	2.36873	8	AGGAAATGAGAGTTGTTGAC;ACATGAACTCAGTGCTCATG;GTTGTCCAAAGAAATGATGA;GCCCTTACCAGTTCTTTGGG;ATGGGGATGAAGAACCAGCT;CCAAGGAGATGATCAGGTCA;GTTGTTGACAGGCAAATAAG;TCAATGACCACTCATTGACC	-4.91;-4.63;-4.02;-3.89;-3.73;-3.64;-3.57;-1.59	456;1526;6981;8829;11230;12870;14022;51113	1.34E+00;2.02E+00;1.59E+00;2.14E+00;2.65E+00;3.39E+00;4.38E+00;1.44E+00	26329;63421;64564;66221;68613;70461;75916;76986	8.29E-01;3.18E+00;2.38E+00;1.78E+00;1.34E+00;8.89E-01;8.63E-01;2.05E-02
RPL36AL	-3.64608	1.35041	4	AGGGAAGGAGGCGCTATGAT;AGAACCTTCTGTAAGAAGTG;AAAGTGACACAGTATAAGAA;AAGGATTCTTTGTATGCCCA	-4.4;-3.6;-3.35;-3.22	2983;13447;18468;21256	8.63E-01;9.08E-01;1.38E+00;2.25E+00	56171;58988;63982;74454	1.22E+00;7.04E-01;4.07E-01;6.83E-02
CHMP7	-2.93749	0.942739	4	TGGACTCTTTCTAACATGCT;CAGATTGTGAAGTTTGCCCG;CGCTTTCAAGAGGAGTCGCG;ACGGACAGAGAAGCGCATCG	-4.76;-4.13;-2.31;-0.54	929;5581;39715;65737	1.33E+00;1.57E+00;5.80E-01;2.85E-01	11705;37742;71868;76513	4.32E-01;4.27E-01;6.38E-01;2.09E-02
CHMP6	-2.08365	0.506369	5	CCTTGTCCTGCTCCGTGACG;GTGTCTGAACAAGATGCACC;CCAGATCGAAATGAAAGTGA;GCTCAAGAAGAAGCGATACC;CAAGGCAGGCAGATCACCTG	-3.51;-3.21;-2.39;-0.78;-0.53	15112;21662;38463;62961;65843	3.88E-01;5.34E-01;5.08E-01;3.89E-01;3.52E-01	11599;14481;38997;55777;62314	4.07E-01;7.26E-01;5.02E-01;4.24E-01;4.72E-01
CHMP5	-3.41692	1.09858	4	AGCTGGTCTTGTAAATCCTA;TGCCCAACAGTCATTCAACA;GACTGACTGCATTGGCACGG;GATGAGAGAGGGTCCTGCAA	-4.42;-4.07;-2.75;-2.42	2813;6303;31648;37888	8.86E-01;1.47E+00;7.92E-01;1.24E+00	39539;45815;71139;74629	6.21E-01;4.56E-01;5.98E-01;6.43E-02
LOC100652758	-2.55477	0.578222	4	CTGCGGGAGTGGAGCCCTGG;GTCTCGCTCATCTCGGACCC;TGGGGCTCCACTGACGCCGA;CGGGCTAGCCCCGCGCAGGG	-3.08;-2.99;-2.52;-1.62	24376;26416;36089;50672	3.92E-01;5.18E-01;6.65E-01;7.37E-01	26769;41355;51005;53045	4.12E-01;4.30E-01;4.09E-01;6.57E-01
OR52N5	-2.96487	0.848122	4	CAAGACCAAGATTCCCCACA;AGTGTGGTAGCATAACGCAA;CAGCAATACACCCCTCAGGA;CATGTGGTCGCAGTACGTAT	-4.15;-4.13;-2.1;-1.49	5354;5658;43206;52726	6.52E-01;1.56E+00;5.13E-01;6.68E-01	24716;34236;71774;72089	3.95E-01;4.38E-01;6.33E-01;1.24E-01
OR52N2	-3.04413	0.787627	4	TGTACATCATTGCTGTCGTG;AGCGCCTGCCCTATTGCCGG;TCTGTGGCCAAGGTATCCTG;GCACAGCATATTAGGTACCA	-4.43;-3.25;-2.88;-1.61	2770;20676;28819;50812	8.92E-01;6.39E-01;8.88E-01;7.32E-01	26630;48596;56767;74672	4.11E-01;4.84E-01;3.76E-01;6.33E-02
OR52N1	-1.24909	0.955229	4	TCTGTGGCCAAGATATCTTG;GGATGGTGGCATAACGCAGA;ATGCTGTACATGGTACACAG;ATCAAAGCCCCCAATCAGCA	-1.74;-1.62;-1.08;-0.56	48745;50663;58894;65574	8.92E-01;5.13E-01;3.75E-01;2.89E-01	11868;18548;26772;28697	4.29E-01;7.01E-01;9.66E-01;1.72E+00
CHST5	-3.08125	0.86753	4	GTGGTCCACACATGCCACGC;GCGGACAGGTTTCGGCTCTG;GTGCACACGATCCTCGCCGC;GCTGGGCACCAACGGCAAGT	-3.42;-3.21;-3.09;-2.6	16914;21555;24168;34657	3.80E-01;6.16E-01;1.08E+00;1.40E+00	42799;53266;55906;60528	7.04E-01;5.58E-01;3.78E-01;4.28E-01
LY6G6C	-2.05823	0.711763	4	CCCACCCCTAGGTAAGATGT;GGTCCACACAGCCCAGCACA;TATATGTCAGACCCAGCTTG;ACCAGAAGAGCCCTGTCAGG	-2.3;-2.14;-1.96;-1.82	39835;42425;45298;47503	6.28E-01;4.34E-01;4.78E-01;8.49E-01	29939;32144;35017;37607	4.47E-01;4.51E-01;6.93E-01;1.25E+00
LY6G6D	-1.21132	0.75377	4	CCCCAGCAGTTCTTGCAAAG;CGAATGCGGTGCTACAACTG;CAAGTGGAGACAGAGTCGGT;TTGGTGAATCAAGGTCACTG	-3.8;-2.24;-0.4;1.6	10069;40894;67227;75417	4.65E-01;4.29E-01;4.62E-01;4.60E-02	2025;10215;36548;67359	1.01E+00;1.10E+00;6.54E-01;2.42E-01
HOXA11	-3.86249	1.74217	4	CGAGACAGCCTACGGCACCC;GCAACTTCAAGTTCGGACAG;GCCACTAAATGGCACCCCCG;AGAAATTGGACGAGACTGCG	-4.13;-3.99;-3.97;-3.36	5648;7281;7601;18296	6.34E-01;1.36E+00;2.47E+00;2.51E+00	59155;69838;70161;71794	1.40E+00;1.33E+00;5.53E-01;1.32E-01
HOXA10	-2.08449	0.479774	4	AGATCGAAACCGCGCCCCGG;GACCAAAAAAGAGTTCGCGG;CTACTGCCTCTACGACTCGG;GGCGGTTACTACGCCCACGG	-3.41;-2.54;-1.45;-0.95	17210;35774;53364;60801	3.79E-01;4.31E-01;3.90E-01;4.20E-01	16641;24078;41654;60216	3.81E-01;5.60E-01;5.41E-01;4.37E-01
GALNTL5	-2.71991	0.694135	5	AGAAAAACTAGACTATCACC;AAGCCCTCTCCTCTTGTAAG;TGAGGTGAACAGAGTATGGC;CAAGAAAATAGTGTGGCGTG;CAAGGCAGGCAGATCACCTG	-3.67;-3.36;-3.16;-2.88;-0.53	12337;18190;22750;28964;65843	4.00E-01;6.07E-01;8.98E-01;1.21E+00;3.52E-01	11599;48495;54708;59253;65123	4.07E-01;6.89E-01;5.17E-01;3.95E-01;3.76E-01
RPS4XP2	-2.8152	0.40793	1	TGTACATCGTATTACACCTG	-2.82	30272	0.408	47150	0.215
GALNTL6	-1.73745	0.879592	7	CCTTCCAGAAGAATACCCAA;ATATGACCAACTCTAGAACA;GTATAATTAACCGAACCCCA;GCCGAGGCGGGCAGATCACG;CCTCATACCCGAAGTGATTG;TCTGTACAAGGATAAGCACC;CAAGGCAGGCAGATCACCTG	-2.7;-2.3;-2.14;-1.91;-1.81;-0.77;-0.53	32643;39844;42564;46089;47735;63060;65843	9.56E-01;8.24E-01;6.21E-01;5.36E-01;5.61E-01;4.21E-01;4.93E-01	11599;14382;29707;31359;34894;37598;44774	4.02E-01;5.86E-01;5.45E-01;7.03E-01;9.29E-01;1.33E+00;1.67E+00
LINC02018	-0.399969	0.87935	1	TCCTGCCTCAGCCTCCCGAG	-0.4	67218	0.0615	10224	0.879
HNRNPCP2	0.0145018	1.07659	1	AGGTGTGAAACGATCTGCAG	0.01	70950	0.038	6492	1.08
LINC02014	-2.31292	0.552162	5	CTGAGGACCCAGACACAGAG;TGTGACCGTCTACGACAAGC;GTCCTCGGCCCTCCAGCCAG;TGTGCTGGAAATGCTTCTGG;CAAGGCAGGCAGATCACCTG	-4.33;-3.68;-2.13;-0.89;-0.53	3657;12027;42625;61575;65843	7.11E-01;8.38E-01;4.72E-01;3.88E-01;3.52E-01	11599;15867;34822;65415;73786	4.07E-01;6.76E-01;5.60E-01;4.03E-01;1.05E-01
KRTAP11-1	-1.33308	0.91129	4	CACAGCAGGTCTCTTGACAG;TTTGTCGAGAGCAAGTCACC;GGTGGAAGTCGTGGTAACTT;CCTGCTCAACTACCTACAGC	-2.05;-1.36;-1.23;-0.7	44046;54605;56698;63971	7.39E-01;5.86E-01;3.76E-01;3.32E-01	13471;20744;22837;33396	4.06E-01;6.37E-01;1.14E+00;1.46E+00
TDG	-1.59994	0.680009	4	TCTGTGTCTGGAATCTTATG;TTTATAGATTGGCATAAACC;CCTGCTCAGGAACCAGTGCA;CCGGCAGCAAAGATCTCTCC	-2.74;-2.36;-1.49;0.18	31932;38980;52658;71955	4.75E-01;4.26E-01;3.95E-01;1.28E-01	5487;24784;38476;45531	6.43E-01;5.46E-01;6.08E-01;9.23E-01
SCAMP1-AS1	0.444531	1.24562	1	GAGAATCGCTTGAATCCGGG	0.44	73043	0.0254	4399	1.25
GOLGA8IP	-2.32195	0.543066	7	GCTGCAATGAATGTTGCAGG;GTTAGAGCAGTCCATGCGGG;ACTCCGTACCTGCTTTACTG;CCTCAGACAGCCACTTCTGG;TATGCGTCGGGTAGAGAAGC;ATCTGAGAGAACGTTTCATG;TCTCATTACAGAAAAGTCCA	-3.65;-3.25;-3.12;-2.51;-2.06;-1.66;0.0	12610;20754;23712;36206;43742;50013;70636	4.06E-01;4.99E-01;6.33E-01;5.98E-01;6.41E-01;7.45E-01;2.80E-01	6641;27429;33714;41236;53730;56703;64846	4.55E-01;5.29E-01;5.32E-01;5.41E-01;5.00E-01;5.39E-01;5.40E-01
LOC101060084	-1.52854	0.484514	1	GGAATCTCACTCTGTCACCC	-1.53	52067	0.172	25378	0.485
LOXHD1	-0.426572	1.26349	5	CCGACGGAGACCCGACTCAG;GCCGAGGCGGGCAGATCACG;ATAATCGAGAAGTTTAGGGT;CTACCTAACCATCTACGGCG;GTGTACTGCTTGCCTTGACG	-3.0;-1.91;-0.82;0.79;2.81	26276;46089;62421;74113;76427	4.90E-01;6.29E-01;7.06E-01;7.44E-01;2.86E-02	1015;3329;15021;31359;51182	1.21E+00;1.79E+00;1.32E+00;1.10E+00;8.99E-01
LRRC26	-1.13288	0.893654	4	AGTGCAGCCCGTTCTCGCGC;CAGGTGCAGCGCGTCTAGAG;GCCGGTTGCCGGCCAATGAG;GCACGCACGTGCACACCTCG	-2.73;-2.59;-0.2;0.98	32065;34790;69036;74535	4.77E-01;4.35E-01;5.12E-01;6.64E-02	2907;8406;42653;45383	8.73E-01;1.25E+00;5.23E-01;9.28E-01
LRRC25	-2.18725	0.543448	4	GCCACTGAAATTCAGGCACG;GCGGAGGACACGGTGCACGA;CCCCATCCACACGAGACAAG;GAGACTCTGGCGATGCCGAG	-3.4;-1.85;-1.83;-1.68	17513;47126;47475;49695	3.78E-01;4.68E-01;4.48E-01;7.71E-01	27747;29967;30313;59944	4.22E-01;4.72E-01;8.36E-01;4.45E-01
LRRC24	-3.47668	1.15731	4	CAGGGCGCCACACTCCACCG;TGGAGGACCAGGCTCTAGCG;CAGAGGGCGGAATGCAGATG;AAGGTGCCCCAGCCTCGCGA	-4.61;-4.05;-2.89;-2.36	1639;6536;28722;38998	1.10E+00;1.45E+00;8.91E-01;1.19E+00	38444;48720;70906;75803	5.96E-01;4.86E-01;5.87E-01;3.71E-02
LRRC23	-1.02155	1.06615	5	AGGTGGGTGAGGTAGTTGAG;GCCGAGGCGGGCAGATCACG;AACCAGATTACTGACACTGA;GCAGGCTGATCAACTTCTCG;GTAGGGCAGTTCATTCATCT	-3.24;-1.91;-0.74;0.33;0.46	20983;46089;63435;72621;73079	4.17E-01;6.29E-01;7.45E-01;6.19E-01;1.26E-01	4363;4821;14007;31359;56459	6.51E-01;1.50E+00;1.40E+00;1.10E+00;6.86E-01
MPDU1	-2.92846	0.757412	4	TGGAGCTAGTGGCATTGACT;TTCCTGGTCATGCACTACAG;ACTACAGTCAAGGGCGTCAG;TGGGAGCCAAGAGTGCTGAA	-3.88;-3.59;-3.18;-1.06	8921;13644;22329;59103	4.96E-01;8.98E-01;1.17E+00;4.69E-01	18339;55115;63800;68522	3.76E-01;5.98E-01;4.05E-01;2.13E-01
LRRC20	-1.62879	0.683166	6	ACCACATTCAGTCAGCTCCG;CTTAAGCTCGTTGTTAGCCA;GCCGAGGCGGGCAGATCACG;TCTGGCCAGAGACATTCCGC;CAAGGCAGGCAGATCACCTG;AGGCCGTGGCCAGAGTAGCA	-3.91;-2.54;-1.91;-1.86;-0.53;0.98	8512;35721;46089;46870;65843;74538	4.34E-01;5.71E-01;5.53E-01;5.04E-01;3.99E-01;9.96E-02	2904;11599;30572;31359;41721;68942	7.31E-01;7.55E-01;5.64E-01;8.45E-01;9.01E-01;3.03E-01
MATCH_LIMIT_EXCEEDED_1	0	1.05246	1	TGTAGTCCCAGCTACTTGGG	0	70809	0.0389	6863	1.05
LRRC29	-2.81296	0.694495	4	TGCAGCCGACTCAGTGACAA;GAGTTCTGGCAACAGGCTAA;AGCCCCGTGCATACAGCCCA;GACTGATGCCAGTTTAGCCA	-4.53;-2.82;-2.3;-1.6	2079;30077;39841;51004	1.00E+00;4.70E-01;5.78E-01;7.25E-01	26438;37601;47365;75361	4.09E-01;4.27E-01;4.49E-01;4.73E-02
LRRC28	-2.45235	0.627551	8	AGAACTACAGTATGTATACG;GACTATGATTACCTGGAGGT;GTTTGCTAACTTTACCCGAG;GGGAACGCTCACGGACTGTG;GCCGAGGCGGGCAGATCACG;GGAATCTCACTCTGTCACCC;CAGCCATGGAGAGCTCATTG;CACCTTCAACTAATTGGATG	-4.25;-3.87;-3.21;-2.94;-1.91;-1.53;-1.07;-0.82	4290;9018;21527;27611;46089;52067;59027;62373	5.27E-01;7.43E-01;6.27E-01;7.12E-01;5.57E-01;5.56E-01;5.46E-01;7.52E-01	15069;18415;25378;31359;49817;55931;68434;73152	4.66E-01;5.08E-01;5.68E-01;6.27E-01;5.53E-01;5.13E-01;4.07E-01;1.98E-01
GCNT4	-2.88009	0.772191	4	GCACCCGTCTAAGTTCATGA;TGTGCTGGTTGTATATAGCA;TCTGTTTCTTACAAAAGGCG;AATATCTGAATGTTATGGGG	-4.7;-3.35;-2.79;-0.68	1168;18432;30785;64233	1.24E+00;7.05E-01;8.20E-01;3.25E-01	13209;46637;59021;76274	4.10E-01;4.63E-01;3.76E-01;2.64E-02
GCNT7	-1.90535	0.63644	9	TAAAGGCATAGCTGCAGGTG;AGTCCTCCTGGCCTTCGAGG;TATAACTATTCATAAGGAGC;GAATGCACAGTCTTTGTTGG;AAGCGGAACACAGTTCATCT;CCGTATTGCACCTTCCCCTG;AAATAAATGGTTAAGTTATG;TGACACTGCAGTATCACAAA;TAAGACTGCTGTGCAAACCT	-3.53;-3.43;-3.23;-2.86;-2.36;-1.73;-1.11;-0.39;1.5	14750;16775;21154;29258;38944;48972;58377;67300;75316	5.00E-01;5.14E-01;5.98E-01;6.21E-01;6.06E-01;5.74E-01;5.20E-01;4.16E-01;1.09E-01	2126;10142;19065;28470;38498;48182;56306;60662;62692	7.04E-01;6.36E-01;6.38E-01;6.33E-01;6.11E-01;5.80E-01;5.41E-01;5.58E-01;8.26E-01
GCNT1	-1.91109	0.649768	6	AGAGTGTGGTTTATGCATCG;AATTTAAAAAGCGCCCTCGG;TCATGTGGACACAAAATCCG;TCCGCCTCTTCTTTACTAAG;TCGCCCAAGCTAGAGTGCAG;CAAGGCAGGCAGATCACCTG	-3.47;-2.41;-2.11;-1.54;-1.41;-0.53	16002;38046;43052;51939;53961;65843	4.09E-01;6.15E-01;5.22E-01;4.83E-01;5.25E-01;4.23E-01	11599;23475;25503;34390;39410;61426	3.99E-01;4.88E-01;6.67E-01;7.44E-01;9.98E-01;6.04E-01
GCNT3	-2.9125	0.724204	4	GAACATATACTGTGTCCATG;GAGGAATAGCATGGAGTCAG;AATACTTCCTGAATACATGT;AACTGTTCAGGGGTCACCCG	-4.17;-3.7;-2.44;-1.34	5128;11701;37527;54973	6.66E-01;1.01E+00;6.30E-01;5.95E-01	22469;39909;65724;72314	3.82E-01;4.27E-01;4.32E-01;1.19E-01
GCNT2	-1.6282	0.732411	5	TTGCAAGGGACACTTCGCAA;AGGGAAAAATATCACCCCAG;CAAGAGCATACAGATAAAGG;CAAGGCAGGCAGATCACCTG;AAATGTCTACTGTGTTCACG	-3.68;-3.31;-0.65;-0.53;0.03	12190;19390;64544;65843;71039	4.02E-01;5.78E-01;7.94E-01;4.07E-01;1.87E-01	6403;11599;12898;58073;65264	5.34E-01;8.61E-01;1.49E+00;4.03E-01;3.71E-01
CCL3P1	-1.5767	0.472081	1	ATTCTGTGGAATCTGCCGGG	-1.58	51327	0.179	26115	0.472
MBD3L2B	-2.63485	0.860542	12	TGCAGCTGGTGAGTCTCATG;CGTTTCTTCTGTAAAGCCCA;GATGCAGCTGGTGAGTCTCA;CTGCGCCTACCGGAGACTGC;CGTCTTAAGTATCCTTGCAC;CAGAAAAGGGGACGAGCACC;GGGGACGGCCGGTGAATCTC;GAAGAAACGAGAAATCCACA;ATGCAGCTGGTGAGTCTCAT;CAAAAGGAACATGATGCCCT;TCTTAAGTATCCTTGCACCG;GGAGGCCGGTGACAAGGATC	-3.98;-3.85;-3.82;-3.57;-2.89;-2.78;-2.59;-2.3;-2.25;-2.23;-1.45;0.1	7469;9354;9768;13984;28594;31155;34685;39903;40696;41054;53348;71464	4.21E-01;5.75E-01;8.82E-01;9.71E-01;6.66E-01;7.48E-01;8.33E-01;8.67E-01;1.14E+00;1.59E+00;1.21E+00;4.19E-01	5978;24101;36388;36746;37525;42742;46287;48826;63458;67685;68094;69973	4.17E-01;8.14E-01;1.12E+00;8.36E-01;6.89E-01;6.75E-01;6.43E-01;6.37E-01;6.66E-01;5.65E-01;4.54E-01;5.29E-01
LPCAT4	-2.41643	0.745923	4	ACTGGGAAAAGTGCTTCGGA;ACATTACCTTAACCCTCTGG;CAGGACTGTGTGCCACAACG;TTGAGACCCTTACCCACCTG	-4.48;-4.09;-1.85;0.76	2411;6054;47091;74020	9.46E-01;1.51E+00;4.53E-01;7.85E-02	3422;30351;71389;75035	8.11E-01;4.68E-01;6.11E-01;5.48E-02
LPCAT2	-2.00738	0.658213	8	TCGGGAATCCGGATCTACAC;TGTTTATAAGCAGTATGACA;GCTGGCTGGACCAGACATGG;TGACCCACCCAATAACTGGT;ACTGGTGAAATGCTGCTGAG;AGACGCAGATCGGCTCCGCG;TATTATAGGATACTGTGACC;GTCATGGACAGTGACACGAC	-4.09;-2.69;-2.59;-2.17;-1.62;-1.29;-1.07;-0.54	6088;32952;34747;41952;50670;55691;59072;65777	4.50E-01;7.39E-01;5.89E-01;5.75E-01;5.57E-01;5.15E-01;5.45E-01;5.67E-01	11665;18370;21751;26780;35490;42714;44473;71349	4.15E-01;5.08E-01;6.22E-01;7.37E-01;7.45E-01;8.00E-01;1.15E+00;2.85E-01
LPCAT3	0.128596	2.25676	6	GCCGAGGCGGGCAGATCACG;TGGTGCGGCCCATTAGTCGA;CAAGGCAGGCAGATCACCTG;TAGTGATTCATTGAGAACTG;CTGTTGACTACTTTGACGGA;GCGCGTCAGAACAGGCGCTG	-1.91;-0.61;-0.53;0.75;1.47;1.62	46089;64970;65843;73996;75270;75443	1.41E+00;2.15E+00;1.38E+00;1.61E+00;8.36E-01;6.81E-02	1999;2172;3446;11599;12472;31359	8.67E-01;1.98E+00;2.81E+00;2.26E+00;3.26E+00;2.36E+00
LPCAT1	-2.86288	0.675476	4	TCACAACCAAGTGGAAATCG;CTCGAACGTGTAGTCAGTCA;GAAGAGCGTCAGTGTCATGA;GCGTCGAAGTAGGACGAGTG	-4.13;-3.37;-2.86;-1.09	5631;18148;29262;58708	6.35E-01;7.14E-01;8.72E-01;4.81E-01	18734;48191;59309;71811	3.75E-01;4.80E-01;3.76E-01;1.31E-01
LOC105372550	-3.15509	1.16629	3	CTCACATACCCCACACACGT;CAACGCTAATCATACACGAA;CTCTCGGAACGGCCTCAGAG	-4.69;-4.18;-0.59	1200;5021;65198	1.35E+00;1.93E+00;2.24E-01	12244;72421;76242	4.73E-01;7.69E-01;2.03E-02
TAGLN	-3.18859	0.98599	4	CTTCCTCTCTACCTTCAAAG;AATCGAGAAGAAGTATGACG;GAAGGCGGCTGAGGACTATG;CCTGGAAGCCCAAGCGCCCA	-3.4;-3.26;-3.19;-2.9	17394;20468;21913;28533	3.78E-01;6.44E-01;1.19E+00;1.73E+00	48927;55513;57008;60030	8.99E-01;6.07E-01;3.76E-01;4.42E-01
CCDC178	-1.72171	0.756882	4	TAGAACCAAACTTTGAGACA;TCTGCTTAGAGTCCAGTAGA;AGGTGCTGGAATATTTACTA;TAAAAGTCTAGAAACTGACC	-2.52;-1.59;-1.42;-1.36	36147;51145;53703;54693	5.48E-01;5.20E-01;3.88E-01;6.04E-01	22749;23740;26297;41295	3.83E-01;5.67E-01;9.85E-01;1.09E+00
CCDC179	-2.10516	0.486953	4	ATCCTTCAGAGGTCACTGAG;AACACCTAAAGAAAGAGAAG;AAGACAACATCATCCTTCAG;CAGACTCACAGGGTTGACTT	-4.4;-3.07;-1.92;0.98	2991;24603;45933;74531	8.62E-01;5.50E-01;4.69E-01;6.65E-02	2911;31509;52819;74448	8.73E-01;4.57E-01;3.94E-01;6.85E-02
ALPP	-3.38393	1.52807	4	TTGTCTACATTGTATGTCTG;CCCGGACTTCTGGAACCGCG;CGAAAGTACATGTTTCGCAT;CGGCGTCCGAGTACCAGTTG	-5.43;-4.26;-3.0;-0.85	22;4211;26348;62064	2.94E+00;1.80E+00;9.83E-01;3.85E-01	15378;51105;73226;77420	3.88E-01;5.20E-01;7.35E-01;4.71E-04
CCDC170	-1.70424	0.753874	6	TTCACCAGAAAGCTCTCCAG;GAGCATGACTGGGTCCACTG;GTTAAACCACTATCGGAATG;GCCGAGGCGGGCAGATCACG;CAAGGCAGGCAGATCACCTG;CTAGCAGAGAAACGATCATG	-3.06;-2.39;-2.06;-1.91;-0.53;-0.26	24935;38325;43828;46089;65843;68477	5.58E-01;6.21E-01;5.28E-01;5.11E-01;3.99E-01;3.21E-01	8965;11599;31359;33614;39128;52523	4.25E-01;7.55E-01;5.53E-01;7.68E-01;1.01E+00;1.01E+00
CCDC171	-0.951411	1.27966	8	GCGCATGATCGGCTATAGAG;GCCGAGGCGGGCAGATCACG;AAGCGTTGGAAAAACATCAA;TCGCCCAAGCTAGAGTGCAG;CAAGGCAGGCAGATCACCTG;TCCTGCCTCAGCCTCCCGAG;TCACACCTTATATCAGCACT;AGGATCCAAGAAAAACTCTG	-3.81;-1.91;-1.7;-1.41;-0.53;-0.4;0.15;2.01	9911;46089;49331;53961;65843;67218;71750;75821	4.06E-01;1.36E+00;1.04E+00;8.56E-01;1.08E+00;6.81E-01;4.63E-01;7.35E-02	1621;5692;10224;11599;23475;28111;31359;67544	8.40E-01;1.02E+00;1.20E+00;1.74E+00;1.31E+00;1.59E+00;2.07E+00;4.75E-01
CCDC172	-1.80913	0.599096	4	AGTCGCCGTTTGATGCGAGA;CAAGCAAACATGTTGAAAAG;AAAAATTAAGAAAGCAACGG;ACAGTGAAATTACAAACCAT	-4.52;-2.01;-0.38;-0.32	2144;44582;67358;67925	9.92E-01;4.46E-01;4.65E-01;2.28E-01	9517;10084;32860;75298	4.79E-01;1.11E+00;7.55E-01;4.88E-02
CCDC173	-1.86671	0.617065	5	GAAGAAGAAATATACAAACA;AAAACGACACAGAGAAAGGG;AAAAGCGTCTTATACAAATG;GCATTTGCGATCTCAAGAAG;CAAGGCAGGCAGATCACCTG	-3.17;-2.5;-2.2;-0.93;-0.53	22535;36387;41555;61031;65843	4.35E-01;4.83E-01;4.79E-01;3.89E-01;3.52E-01	11599;16411;35887;41069;54924	4.07E-01;6.58E-01;5.43E-01;7.31E-01;7.46E-01
CCDC174	-1.55796	0.822004	5	AAACATAAAGGAAAAGCGAA;GGAATCTCACTCTGTCACCC;ACTTCAGCGCCAGCAATGGG;GAGGCCCGGCAACTTGGTGT;ATCTGGAGCAAACAGAATGT	-3.19;-1.53;-1.33;-0.9;-0.84	22030;52067;55045;61450;62153	4.28E-01;7.99E-01;5.22E-01;3.88E-01;4.78E-01	15289;15988;22397;25378;55427	3.88E-01;6.72E-01;9.13E-01;1.41E+00;7.26E-01
CCDC175	-2.29844	0.52294	4	AAAACAAGAGTTGACTGCAC;TCTTCCCAATAGCATTAAGA;ACGAATTGAATTACTTAACG;TTTATTCTTTCTTACCGCTG	-4.02;-3.52;-1.02;-0.63	6907;14958;59732;64823	5.69E-01;8.36E-01;3.77E-01;3.09E-01	12619;17710;62495;70539	4.18E-01;7.29E-01;3.92E-01;1.62E-01
CCDC177	-2.06984	0.51692	4	TTTCACGCCTTTGAGCCCCG;GCGGCCGGTGATCGGAACCA;CCACCGGCTTGACCGCACAG;GCATCGTCGTCATCCTACAG	-3.05;-3.05;-1.32;-0.85	25133;25188;55195;62045	3.98E-01;5.39E-01;3.81E-01;3.85E-01	15397;22247;52237;52309	3.88E-01;5.99E-01;3.98E-01;6.82E-01
PDK1	-1.61363	0.807046	6	CCATCTCATCGAAAACACAT;ACCAGGACAGCCAATACAAG;TTGCCGCAGAAACATAAATG;CAAGGCAGGCAGATCACCTG;TCCTGCCTCAGCCTCCCGAG;AGCGCGCGTAGAAGTCCACC	-4.73;-2.25;-1.63;-0.53;-0.4;-0.13	1033;40679;50470;65843;67218;69563	1.13E+00;6.77E-01;6.31E-01;7.55E-01;4.09E-01;2.80E-01	7879;10224;11599;26972;36763;76409	4.47E-01;8.29E-01;1.38E+00;1.03E+00;1.12E+00;3.50E-02
PDK3	-2.10863	0.540848	6	TAAGCATGCGGAAAGAGATG;ACATCCGCCACGTTACAGGT;TTACTTAACCGCCCTTCAGT;GCCGAGGCGGGCAGATCACG;TAGCATATGAAACAGATGTG;CAAGGCAGGCAGATCACCTG	-3.45;-3.45;-2.76;-1.91;-0.55;-0.53	16391;16514;31357;46089;65709;65843	4.13E-01;5.83E-01;5.53E-01;5.11E-01;3.98E-01;4.23E-01	11599;11733;31359;46070;60954;61036	3.99E-01;7.48E-01;5.53E-01;5.11E-01;4.14E-01;6.20E-01
PDK2	-1.7029	0.606355	4	CTTGAGTACAAGGACACCTA;GGTGCTGCCATCAAAGATGA;CAGGAGCTTAGCCATGTCGT;CTCCAAACAGCCGATTCACA	-4.02;-1.75;-0.71;-0.33	6902;48679;63735;67887	5.70E-01;4.85E-01;4.04E-01;2.29E-01	9555;13707;28763;70543	4.78E-01;8.95E-01;8.90E-01;1.62E-01
EBP	-2.49599	0.544695	4	GAAAGGCGATCACCACCCAC;GCCAGCCAGTATATGCCAGG;AGTGTGTGGGTTCATTCACC;GCTGTTGTCAGGTCGTGCTG	-3.77;-2.49;-1.95;-1.77	10576;36598;45509;48275	4.54E-01;4.29E-01;4.75E-01;8.21E-01	29168;31933;40844;66869	4.38E-01;4.53E-01;5.57E-01;2.55E-01
PDK4	-2.58569	0.566908	4	ACATGAACCGTATTTCTACT;TATTTACTAATTGGGTCGGG;CATACACGATGTGAATTGGT;GTAGTCCCTACAATGGCACA	-3.79;-2.54;-2.25;-1.76	10312;35702;40758;48361	4.60E-01;4.31E-01;5.59E-01;8.18E-01	29081;36669;41756;67140	4.37E-01;4.28E-01;5.39E-01;2.48E-01
LNPEP	-2.16028	0.447309	5	GCCTGAGCTTCTATTCATGA;AGGATAGTGGAATATGCCAC;GGGTTTGCTCACCTTCCGAG;GGAATCTCACTCTGTCACCC;TTCATAGCGTAGTGGCACAA	-3.86;-3.19;-2.2;-1.53;-0.02	9147;22078;41492;52067;70362	4.47E-01;5.27E-01;4.80E-01;4.75E-01;2.08E-01	7080;25378;35950;55390;68288	5.07E-01;4.86E-01;5.42E-01;4.29E-01;2.73E-01
ALPI	-2.74371	0.68434	4	CCGTTCGCAGACATACAATG;CATGATGACCATGGTCGATG;CAACACGACACGCGGCAATG;GATCCACCGAGACCCCACAC	-3.15;-2.88;-2.81;-2.13	22814;28941;30318;42674	3.83E-01;4.83E-01;8.35E-01;1.04E+00	34773;47124;48501;54608	5.22E-01;4.68E-01;4.35E-01;6.07E-01
SEC61A1	-2.00238	0.666621	4	TCATCACATACACGATAGAC;GCTGAATGCCTTCCATACGA;AAGGCACATTGATGGAGCTA;GAAGATAAAGAGGGTGATAG	-2.71;-1.86;-1.79;-1.65	32525;46863;48011;50184	4.84E-01;4.65E-01;4.41E-01;7.54E-01	27265;29431;30579;44935	4.17E-01;4.77E-01;8.27E-01;9.46E-01
SEC61A2	-1.87675	0.69501	8	CAAAGTCCGAGCTTTACGGG;CCCCGTCATGACATACACAA;AGTCCCACTACCATTAACAC;AAATCGAACAGACAGCATCT;GCCGAGGCGGGCAGATCACG;GTAGGAGGAAGAGGAAGAGG;CAAGGCAGGCAGATCACCTG;GAGAATCGCTTGAATCCGGG	-3.96;-2.55;-2.55;-2.19;-1.91;-1.76;-0.53;0.44	7772;35547;35595;41645;46089;48378;65843;73043	4.17E-01;8.30E-01;6.01E-01;5.73E-01;5.57E-01;6.30E-01;4.15E-01;2.03E-01	4399;11599;29064;31359;35797;41847;41895;69672	5.20E-01;6.25E-01;5.50E-01;6.27E-01;7.36E-01;8.32E-01;1.30E+00;3.67E-01
ALPL	-1.58104	0.914113	7	AGCTCTTCCAGGTGTCAACG;CATTGGCCTTCACCCCACAC;TCGCCCAAGCTAGAGTGCAG;GGCATGGTTCACTCTCGTGG;GATGACATTCTTAGCCACGT;CAAGGCAGGCAGATCACCTG;TCCTGCCTCAGCCTCCCGAG	-4.58;-2.04;-1.41;-1.28;-0.83;-0.53;-0.4	1777;44174;53961;55853;62318;65843;67218	8.55E-01;1.00E+00;1.00E+00;6.88E-01;5.68E-01;4.02E-01;4.30E-01	10224;11599;15124;21589;23475;33268;75665	4.03E-01;6.79E-01;9.61E-01;1.10E+00;1.58E+00;1.60E+00;7.05E-02
PECR	-2.4442	0.73519	6	ATGGAAATCCAGCTTTAGTA;GTAGAAGGTACCCGTCAGGT;AGAACTGATGTGTTCAGCAG;ACAATGCAACATCCGGAATG;GGAATCTCACTCTGTCACCC;CAAGGCAGGCAGATCACCTG	-5.08;-2.88;-2.84;-1.8;-1.53;-0.53	182;28824;29754;47824;52067;65843	1.86E+00;4.91E-01;5.77E-01;4.96E-01;5.68E-01;4.23E-01	11599;25378;29618;47688;48598;77260	3.99E-01;4.83E-01;5.79E-01;4.97E-01;6.63E-01;6.10E-03
LINC01090	-1.22372	0.689604	2	GCCGAGGCGGGCAGATCACG;CAAGGCAGGCAGATCACCTG	-1.91;-0.53	46089;65843	3.17E-01;1.41E-01	11599;31359	5.94E-01;7.85E-01
LINC01099	-1.91411	0.392609	1	GCCGAGGCGGGCAGATCACG	-1.91	46089	0.225	31359	0.393
LINC01098	-1.22372	0.689604	2	GCCGAGGCGGGCAGATCACG;CAAGGCAGGCAGATCACCTG	-1.91;-0.53	46089;65843	3.17E-01;1.41E-01	11599;31359	5.94E-01;7.85E-01
CTAGE11P	-2.76663	0.700454	5	TATTATTCAGTTATCTGAAG;TCAACAAGATGAATTGATGG;CATTGGCAAGTGTCCAGTCA;TGTGCTTGAAGAAGACACAA;GTTAGGAGTCGGCTTTATGT	-3.59;-3.1;-3.04;-2.65;-1.47	13778;24116;25498;33719;52995	3.91E-01;4.99E-01;7.94E-01;9.94E-01;8.24E-01	24447;43745;51944;53326;63652	4.61E-01;5.80E-01;4.85E-01;4.56E-01;4.26E-01
DDIT3	-2.94565	0.74053	4	CTGGTATGAGGACCTGCAAG;ATTTCCAGGAGGTGAAACAT;GACTGGAATCTGGAGAGTGA;TCAGCCAAGCCAGAGAAGCA	-3.69;-2.91;-2.74;-2.44	11836;28258;31940;37545	4.30E-01;4.92E-01;7.83E-01;1.26E+00	39897;45530;49184;65599	6.29E-01;4.53E-01;4.27E-01;2.88E-01
DDIT4	-3.28095	1.04802	4	CTGGCCTACAGCGAGCCGTG;CGGGCAACGACACCCCATCC;TGAGCGCGGCGGCCGATCTG;CACACAAGTGTTCATCCTCA	-4.31;-4.25;-2.76;-1.81	3805;4299;31519;47721	7.72E-01;1.78E+00;7.96E-01;8.41E-01	29721;45923;73143;73639	4.45E-01;4.57E-01;7.28E-01;8.75E-02
LOC101927118	-1.63345	0.824184	9	ACTGAGATTTCCTTCATACT;TTATATGAAAGAAGTAGGTA;CATGATCATCAGTGTGAATG;TCTTCAAAGCCACATCATCG;GACACCCCCATCTAAGGTTA;TTTGAGGAAATCACGCCAGG;AAATTCCGAAGACTACATGA;ACTGTGACCATCAGTACAGA;AATGAGATCTCCTTTAAGCT	-3.74;-3.31;-3.12;-2.96;-2.23;-0.84;-0.14;0.68;0.94	11134;19408;23690;27054;41120;62224;69497;73808;74460	4.27E-01;5.23E-01;5.70E-01;6.60E-01;5.89E-01;7.66E-01;7.51E-01;5.41E-01;1.53E-01	2982;3634;7945;15218;36322;50389;53742;58031;66299	5.97E-01;1.25E+00;1.32E+00;1.20E+00;6.43E-01;5.66E-01;5.83E-01;6.49E-01;6.07E-01
RIIAD1	-2.90411	0.700111	4	GCAGCTGCGAAAATTCAAGG;GCGCTGCGCTAAGCGCCCCG;GAAGTAGAGTGGCTCATAAG;TTGCTAACGAAAAGTACCTA	-4.01;-2.92;-2.44;-2.25	7131;28015;37602;40691	5.60E-01;4.95E-01;6.28E-01;1.12E+00	36751;39841;49444;70317	5.60E-01;4.27E-01;4.24E-01;1.68E-01
GOLGA8T	-2.52169	0.694822	10	CAGCCAAGACTCACATCCCT;GCTGCAATGAATGTTGCAGG;GGATTCAGGAGCAGGAAGAG;GTTAGAGCAGTCCATGCGGG;CCAAGACTCACATCCCTAGG;GCAGCAAAGCACGTACGGAG;ACTCCGTACGTGCTTTGCTG;ATCTGAGAGAACGTTTCATG;CACCAGAAGTGGCTTTCTCA;TCTCATTACAGAAAAGTCCA	-4.14;-3.65;-3.46;-3.25;-2.81;-2.78;-2.0;-1.66;-1.46;0.0	5507;12610;16143;20754;30390;31019;44759;50013;53101;70636	4.36E-01;5.41E-01;6.74E-01;7.78E-01;7.12E-01;9.51E-01;7.11E-01;7.67E-01;9.78E-01;3.99E-01	6641;24341;27429;32683;46441;47070;56703;61305;64846;71937	4.17E-01;6.63E-01;6.02E-01;6.05E-01;6.97E-01;6.01E-01;5.85E-01;5.21E-01;4.83E-01;3.20E-01
OR5R1	-2.74761	0.660163	4	AGGTGAGAAAACAACCCAGT;TAAAAACACCCCAAAGCACG;TAATAGCAGAGGAGTAACAA;ATCAGTGTTGAATAATGCAG	-4.23;-3.51;-1.77;-1.48	4476;15240;48343;52782	7.14E-01;8.24E-01;4.37E-01;6.66E-01	24660;29099;62202;72966	3.94E-01;4.81E-01;3.89E-01;1.03E-01
GOLGA8Q	-1.15161	1.02497	10	GCTGCAATGAATGTTGCAGG;TGAACATATAGAAGGAGAGA;GTGTAAAGGAGAGTTAGAGA;CAGCAAAGCACATACAGAGT;GCAGCAAAGCACATACAGAG;GAAAGCCGAAAGGGAGCTAG;GTTGGGTAGAGCAGCTGGAG;GAGGATGAGTAAAATGTCGC;GATGAGTAAAATGTCGCAGG;ATCTGAGAGAACGTTCCATG	-3.65;-2.93;-2.45;-2.03;-2.0;-1.94;-1.46;-0.59;0.05;5.48	12610;27777;37338;44304;44730;45710;53182;65277;71171;77342	4.83E-01;7.81E-01;8.72E-01;8.60E-01;6.62E-01;6.01E-01;5.76E-01;5.48E-01;4.22E-01;5.56E-03	100;6271;12164;24262;31724;32712;33128;40120;49647;64846	1.89E+00;8.23E-01;8.52E-01;6.73E-01;6.81E-01;8.77E-01;1.23E+00;1.27E+00;1.18E+00;7.71E-01
GOLGA8S	-2.93651	0.592701	2	ACTGCAATGAATGTTGCAGA;GAAAGCCGAAAGGGAGCTAG	-3.93;-1.94	8099;45710	7.27E-01;4.58E-01	31724;69348	3.15E-01;9.59E-02
GOLGA8R	-1.0898	1.17273	12	GCTGCAATGAATGTTGCAGG;TGAACATATAGAAGGAGAGA;CACCGGAAGTGGCTGTCTCA;GTGTAAAGGAGAGTTAGAGA;CAGCAAAGCACATACAGAGT;GCAGCAAAGCACATACAGAG;GAAAGCCGAAAGGGAGCTAG;GTTGGGTAGAGCAGCTGGAG;GAGGATGAGTAAAATGTCGC;GATGAGTAAAATGTCGCAGG;CCTGAGACAGCCACTTCCGG;ATCTGAGAGAACGTTCCATG	-3.65;-2.93;-2.63;-2.45;-2.03;-2.0;-1.94;-1.46;-0.59;0.05;1.07;5.48	12610;27777;34022;37338;44304;44730;45710;53182;65277;71171;74712;77342	5.58E-01;1.00E+00;9.91E-01;8.59E-01;8.95E-01;7.10E-01;6.41E-01;6.27E-01;7.37E-01;7.31E-01;5.45E-01;6.67E-03	100;2730;6271;12164;24262;31724;32712;33128;40120;43420;49647;64846	1.82E+00;1.24E+00;1.26E+00;1.11E+00;7.64E-01;7.33E-01;9.13E-01;1.23E+00;1.18E+00;1.41E+00;1.49E+00;9.25E-01
GOLGA8M	-2.32413	0.544637	7	GCTGCAATGAATGTTGCAGG;GTTAGAGCAGTCCATGCGGG;ACTCCGTACCTGCTTTACTG;CCTCAGACAGCCACTTCTGG;TATGCGTCGGGTAGAGAAGC;ATCTGAGAGAACGTTTCATG;TCTCACTACAGAAAAGTCCA	-3.65;-3.25;-3.12;-2.51;-2.06;-1.66;-0.02	12610;20754;23712;36206;43742;50013;70381	4.06E-01;4.99E-01;6.33E-01;5.98E-01;6.41E-01;7.45E-01;2.91E-01	7063;27429;33714;41236;53730;56703;64846	4.44E-01;5.29E-01;5.32E-01;5.41E-01;5.00E-01;5.39E-01;5.40E-01
GOLGA8O	-0.916774	1.18751	10	GCTGCAATGAATGTTGCAGG;TGAACATATAGAAGGAGAGA;CACCGGAAGTGGCTGTCTCA;CAGCAAAGCACATACAGAGT;GCAGCAAAGCACATACAGAG;GAAAGCCGAAAGGGAGCTAG;GAGGATGAGTAAAATGTCGC;GATGAGTAAAATGTCGCAGG;CCTGAGACAGCCACTTCCGG;ATCTGAGAGAACGTTCCATG	-3.65;-2.93;-2.63;-2.03;-2.0;-1.94;-0.59;0.05;1.07;5.48	12610;27777;34022;44304;44730;45710;65277;71171;74712;77342	4.83E-01;7.81E-01;7.51E-01;8.60E-01;6.62E-01;6.01E-01;8.52E-01;8.24E-01;5.93E-01;5.56E-03	100;2730;6271;12164;31724;32712;33128;43420;49647;64846	1.89E+00;1.38E+00;1.45E+00;1.34E+00;6.81E-01;8.77E-01;1.23E+00;1.07E+00;1.18E+00;7.71E-01
GOLGA8N	-0.991693	1.17991	11	ACTGCAATGAATGTTGCAGA;TGAACATATAGAAGGAGAGA;CACCGGAAGTGGCTGTCTCA;CAGCAAAGCACATACAGAGT;GCAGCAAAGCACATACAGAG;GAAAGCCGAAAGGGAGCTAG;GTTGGGTAGAGCAGCTGGAG;GAGGATGAGTAAAATGTCGC;GATGAGTAAAATGTCGCAGG;CCTGAGACAGCCACTTCCGG;ATCTGAGAGAACGTTCCATG	-3.93;-2.93;-2.63;-2.03;-2.0;-1.94;-1.46;-0.59;0.05;1.07;5.48	8099;27777;34022;44304;44730;45710;53182;65277;71171;74712;77342	4.19E-01;8.87E-01;8.64E-01;1.03E+00;7.73E-01;6.47E-01;6.40E-01;7.88E-01;7.73E-01;5.67E-01;6.11E-03	100;2730;6271;12164;24262;31724;32712;33128;43420;49647;69348	1.85E+00;1.31E+00;1.35E+00;1.22E+00;8.35E-01;8.05E-01;1.05E+00;1.46E+00;1.24E+00;1.33E+00;5.27E-01
GOLGA8H	-2.25906	0.586583	9	GCTGCAATGAATGTTGCAGG;GGATTCAGGAGCAGGAAGAG;GTTAGAGCAGTCCATGCGGG;GCAGCAAAGCACGTACGGAG;TATGCGTCGGGTAGAGAAGC;ACTCCGTACGTGCTTTGCTG;ATCTGAGAGAACGTTTCATG;CACCAGAAGTGGCTTTCTCA;TCTCATTACAGAAAAGTCCA	-3.65;-3.46;-3.25;-2.78;-2.06;-2.0;-1.66;-1.46;0.0	12610;16143;20754;31019;43742;44759;50013;53101;70636	4.52E-01;5.16E-01;6.04E-01;6.00E-01;5.85E-01;6.28E-01;6.74E-01;8.59E-01;3.60E-01	6641;24341;27429;32683;33714;46441;56703;61305;64846	4.24E-01;5.96E-01;5.67E-01;5.89E-01;6.98E-01;6.01E-01;5.36E-01;5.39E-01;6.94E-01
GOLGA8K	-2.14348	0.610308	12	CAGCCAAGACTCACATCCCT;GCTGCAATGAATGTTGCAGG;GGATTCAGGAGCAGGAAGAG;GTTAGAGCAGTCCATGCGGG;CCAAGACTCACATCCCTAGG;GCAGCAAAGCACGTACGGAG;TATGCGTCGGGTAGAGAAGC;ACTCCGTACGTGCTTTGCTG;ATCTGAGAGAACGTTTCATG;CACCAGAAGTGGCTTTCTCA;TCTCATTACAGAAAAGTCCA;CCCTCAGGAGCACCTGGAAG	-4.14;-3.65;-3.46;-3.25;-2.81;-2.78;-2.06;-2.0;-1.66;-1.46;0.0;1.56	5507;12610;16143;20754;30390;31019;43742;44759;50013;53101;70636;75377	4.21E-01;5.29E-01;6.14E-01;6.77E-01;6.47E-01;7.52E-01;6.45E-01;7.09E-01;7.19E-01;8.24E-01;4.16E-01;1.41E-01	2065;6641;24341;27429;32683;33714;46441;47070;56703;61305;64846;71937	6.24E-01;7.03E-01;6.40E-01;6.28E-01;6.41E-01;6.91E-01;6.44E-01;6.61E-01;5.92E-01;5.58E-01;5.58E-01;3.84E-01
GOLGA8J	-2.36604	0.666257	11	CAGCCAAGACTCACATCCCT;GCTGCAATGAATGTTGCAGG;GTTAGAGCAGTCCATGCGGG;CCAAGACTCACATCCCTAGG;GCAGCAAAGCACGTACGGAG;ACAGAGCGTCTTCAAGGAGC;TATGCGTCGGGTAGAGAAGC;ACTCCGTACGTGCTTTGCTG;ATCTGAGAGAACGTTTCATG;CACCAGAAGTGGCTTTCTCA;TCTCATTACAGAAAAGTCCA	-4.14;-3.65;-3.25;-2.81;-2.78;-2.21;-2.06;-2.0;-1.66;-1.46;0.0	5507;12610;20754;30390;31019;41400;43742;44759;50013;53101;70636	4.27E-01;5.31E-01;5.82E-01;6.21E-01;6.56E-01;6.28E-01;6.63E-01;8.11E-01;8.70E-01;1.10E+00;4.39E-01	6641;24341;27429;32683;33714;36035;46441;47070;56703;64846;71937	4.15E-01;7.40E-01;6.54E-01;6.47E-01;6.30E-01;6.88E-01;6.26E-01;7.32E-01;6.22E-01;5.18E-01;3.52E-01
GOLGA8G	-2.93651	0.592701	2	ACTGCAATGAATGTTGCAGA;GAAAGCCGAAAGGGAGCTAG	-3.93;-1.94	8099;45710	7.27E-01;4.58E-01	31724;69348	3.15E-01;9.59E-02
GOLGA8F	-2.93651	0.592701	2	ACTGCAATGAATGTTGCAGA;GAAAGCCGAAAGGGAGCTAG	-3.93;-1.94	8099;45710	7.27E-01;4.58E-01	31724;69348	3.15E-01;9.59E-02
GOLGA8A	-2.29057	0.557422	9	GACTCACAGCCTCAGATGAG;TGCATCAGTCTCCTGAACCG;TGAACCGTGGGCAAAAGGAG;AGAAGAAGCATGATACGCAT;AAGGACACGTGACACAGGTG;GCAGGTTTGCACATTGAAGG;AAGCAGCAGTCCTGAACTCG;CAAGGCAGGCAGATCACCTG;CGGGAGCAGATACTGCTGAA	-4.13;-3.49;-3.36;-2.85;-2.63;-2.34;-1.36;-0.53;0.09	5657;15523;18359;29494;34015;39199;54586;65843;71417	4.46E-01;5.20E-01;6.56E-01;6.18E-01;6.91E-01;7.69E-01;5.67E-01;4.34E-01;3.17E-01	6025;11599;22856;38243;43441;47968;59079;61905;71777	4.36E-01;5.86E-01;5.77E-01;6.04E-01;5.85E-01;5.82E-01;5.17E-01;5.21E-01;2.97E-01
GOLGA8B	-2.29057	0.557422	9	GACTCACAGCCTCAGATGAG;TGCATCAGTCTCCTGAACCG;TGAACCGTGGGCAAAAGGAG;AGAAGAAGCATGATACGCAT;AAGGACACGTGACACAGGTG;GCAGGTTTGCACATTGAAGG;AAGCAGCAGTCCTGAACTCG;CAAGGCAGGCAGATCACCTG;CGGGAGCAGATACTGCTGAA	-4.13;-3.49;-3.36;-2.85;-2.63;-2.34;-1.36;-0.53;0.09	5657;15523;18359;29494;34015;39199;54586;65843;71417	4.46E-01;5.20E-01;6.56E-01;6.18E-01;6.91E-01;7.69E-01;5.67E-01;4.34E-01;3.17E-01	6025;11599;22856;38243;43441;47968;59079;61905;71777	4.36E-01;5.86E-01;5.77E-01;6.04E-01;5.85E-01;5.82E-01;5.17E-01;5.21E-01;2.97E-01
CT45A9	-1.49463	1.24854	18	ATTAATTTCTTGTTGGCTTT;TATCAGCATTAATTTCTTGT;AAAATCTTCGAAATGCTTGA;TCCTTGTTTCCTTGCCAACA;CCTTGCTGCTTCCTTGATGA;AGAGGATGGCCCTGTTGGCA;AGGCTGTTTCTCTGCATTCT;TGCTATTCCACCCAGCCAAT;CATCAAGGAAGCAGCAAGGT;CGAAGGACTGTCACATTCCC;GTTTCACCAGAGCTTATGAC;GTCATCTCCAGAGAAACTGC;CTGGTAACGTTTCCTCCCAC;GTATCAGAAAAGGCAGAGGA;GCATGTCCTGTCATAAGCTC;CTTCGTATCAGAAAAGGCAG;TATAAAACGTCAATTAGTGA;GATAGGATGATGCAGAAACC	-4.43;-3.52;-3.03;-2.76;-2.65;-2.43;-2.16;-1.89;-1.44;-1.26;-0.99;-0.71;-0.69;-0.42;-0.34;-0.29;0.83;1.28	2756;15001;25703;31440;33634;37769;42200;46432;53470;56151;60186;63846;64005;67017;67763;68201;74200;75041	4.61E-01;7.37E-01;1.15E+00;1.25E+00;1.09E+00;1.09E+00;1.10E+00;1.11E+00;1.34E+00;1.24E+00;1.27E+00;1.27E+00;9.46E-01;8.77E-01;6.67E-01;5.45E-01;4.39E-01;2.46E-01	2401;3242;9241;9679;10425;13437;13596;17256;21292;23972;31010;35242;39673;43808;45984;51759;62430;74686	4.86E-01;8.69E-01;6.86E-01;9.39E-01;1.24E+00;1.29E+00;1.71E+00;1.67E+00;1.62E+00;1.74E+00;1.42E+00;1.42E+00;1.40E+00;1.43E+00;1.66E+00;1.57E+00;1.05E+00;2.83E-01
CT45A8	-1.49463	1.24854	18	ATTAATTTCTTGTTGGCTTT;TATCAGCATTAATTTCTTGT;AAAATCTTCGAAATGCTTGA;TCCTTGTTTCCTTGCCAACA;CCTTGCTGCTTCCTTGATGA;AGAGGATGGCCCTGTTGGCA;AGGCTGTTTCTCTGCATTCT;TGCTATTCCACCCAGCCAAT;CATCAAGGAAGCAGCAAGGT;CGAAGGACTGTCACATTCCC;GTTTCACCAGAGCTTATGAC;GTCATCTCCAGAGAAACTGC;CTGGTAACGTTTCCTCCCAC;GTATCAGAAAAGGCAGAGGA;GCATGTCCTGTCATAAGCTC;CTTCGTATCAGAAAAGGCAG;TATAAAACGTCAATTAGTGA;GATAGGATGATGCAGAAACC	-4.43;-3.52;-3.03;-2.76;-2.65;-2.43;-2.16;-1.89;-1.44;-1.26;-0.99;-0.71;-0.69;-0.42;-0.34;-0.29;0.83;1.28	2756;15001;25703;31440;33634;37769;42200;46432;53470;56151;60186;63846;64005;67017;67763;68201;74200;75041	4.61E-01;7.37E-01;1.15E+00;1.25E+00;1.09E+00;1.09E+00;1.10E+00;1.11E+00;1.34E+00;1.24E+00;1.27E+00;1.27E+00;9.46E-01;8.77E-01;6.67E-01;5.45E-01;4.39E-01;2.46E-01	2401;3242;9241;9679;10425;13437;13596;17256;21292;23972;31010;35242;39673;43808;45984;51759;62430;74686	4.86E-01;8.69E-01;6.86E-01;9.39E-01;1.24E+00;1.29E+00;1.71E+00;1.67E+00;1.62E+00;1.74E+00;1.42E+00;1.42E+00;1.40E+00;1.43E+00;1.66E+00;1.57E+00;1.05E+00;2.83E-01
LOC105373734	-1.52854	0.484514	1	GGAATCTCACTCTGTCACCC	-1.53	52067	0.172	25378	0.485
LOC105373730	-1.52854	0.484514	1	GGAATCTCACTCTGTCACCC	-1.53	52067	0.172	25378	0.485
CT45A1	-1.51115	1.39766	19	TATCAGCATTAATTTCTCGT;AAAATCTTCGAAATGCTTGA;ATTAATTTCTCGTTGGCTTT;TCCTTGTTTCCTTGCCAACA;CCTTGCTGCTTCCTTGATGA;AGAGGATGGCCCTGTTGGCA;AGGCTGTTTCTCTGCATTCT;TGCTATTCCACCCAGCCAAT;CATCAAGGAAGCAGCAAGGT;CGAAGGACTGTCACATTCCC;GTTTCACCAGAGCTTATGAC;CTTACTCTTTGCTTTGGACA;GGCTTACTTACTCTTTGCTT;GTCATCTCCAGAGAAACTGC;CTGGTAACGTTTCCTCCCAC;GTATCAGAAAAGGCAGAGGA;GCATGTCCTGTCATAAGCTC;CTTCGTATCAGAAAAGGCAG;GATAGGATGATGCAGAAACC	-4.25;-3.03;-2.86;-2.76;-2.65;-2.43;-2.16;-1.89;-1.44;-1.26;-0.99;-0.99;-0.84;-0.71;-0.69;-0.42;-0.34;-0.29;1.28	4274;25703;29448;31440;33634;37769;42200;46432;53470;56151;60186;60218;62216;63846;64005;67017;67763;68201;75041	4.23E-01;1.70E+00;1.60E+00;1.37E+00;1.21E+00;1.21E+00;1.25E+00;1.27E+00;1.58E+00;1.48E+00;1.54E+00;1.18E+00;1.04E+00;8.86E-01;6.96E-01;6.31E-01;5.59E-01;6.38E-01;2.60E-01	2401;9241;9679;10425;13437;13596;15226;17224;17256;21292;23972;31010;35242;39673;43808;45984;47996;51759;73164	4.76E-01;5.52E-01;6.51E-01;8.37E-01;8.97E-01;1.19E+00;1.38E+00;1.55E+00;2.00E+00;1.90E+00;2.01E+00;1.62E+00;1.59E+00;1.56E+00;1.57E+00;1.81E+00;2.14E+00;2.35E+00;4.69E-01
CT45A3	-1.5817	1.18032	17	TATCAGCATTAATTTCTCGT;AAAATCTTCGAAATGCTTGA;ATTAATTTCTCGTTGGCTTT;TCCTTGTTTCCTTGCCAACA;CCTTGCTGCTTCCTTGATGA;AGAGGATGGCCCTGTTGGCA;AGGCTGTTTCTCTGCATTCT;TGCTATTCCACCCAGCCAAT;CATCAAGGAAGCAGCAAGGT;CGAAGGACTGTCACATTCCC;GTTTCACCAGAGCTTATGAC;GTCATCTCCAGAGAAACTGC;CTGGTAACGTTTCCTCCCAC;GTATCAGAAAAGGCAGAGGA;GCATGTCCTGTCATAAGCTC;CTTCGTATCAGAAAAGGCAG;GATAGGATGATGCAGAAACC	-4.25;-3.03;-2.86;-2.76;-2.65;-2.43;-2.16;-1.89;-1.44;-1.26;-0.99;-0.71;-0.69;-0.42;-0.34;-0.29;1.28	4274;25703;29448;31440;33634;37769;42200;46432;53470;56151;60186;63846;64005;67017;67763;68201;75041	4.22E-01;1.45E+00;1.34E+00;1.13E+00;9.89E-01;9.74E-01;9.76E-01;9.69E-01;1.14E+00;1.03E+00;1.02E+00;9.92E-01;7.42E-01;6.59E-01;5.42E-01;5.76E-01;2.32E-01	2401;9241;9679;10425;13437;13596;17256;21292;23972;31010;35242;39673;43808;45984;47996;51759;73164	4.97E-01;5.41E-01;6.89E-01;9.23E-01;1.00E+00;1.36E+00;1.37E+00;1.36E+00;1.48E+00;1.24E+00;1.25E+00;1.25E+00;1.29E+00;1.51E+00;1.82E+00;2.05E+00;4.19E-01
CT45A2	-1.49463	1.24854	18	ATTAATTTCTTGTTGGCTTT;TATCAGCATTAATTTCTTGT;AAAATCTTCGAAATGCTTGA;TCCTTGTTTCCTTGCCAACA;CCTTGCTGCTTCCTTGATGA;AGAGGATGGCCCTGTTGGCA;AGGCTGTTTCTCTGCATTCT;TGCTATTCCACCCAGCCAAT;CATCAAGGAAGCAGCAAGGT;CGAAGGACTGTCACATTCCC;GTTTCACCAGAGCTTATGAC;GTCATCTCCAGAGAAACTGC;CTGGTAACGTTTCCTCCCAC;GTATCAGAAAAGGCAGAGGA;GCATGTCCTGTCATAAGCTC;CTTCGTATCAGAAAAGGCAG;TATAAAACGTCAATTAGTGA;GATAGGATGATGCAGAAACC	-4.43;-3.52;-3.03;-2.76;-2.65;-2.43;-2.16;-1.89;-1.44;-1.26;-0.99;-0.71;-0.69;-0.42;-0.34;-0.29;0.83;1.28	2756;15001;25703;31440;33634;37769;42200;46432;53470;56151;60186;63846;64005;67017;67763;68201;74200;75041	4.61E-01;7.37E-01;1.15E+00;1.25E+00;1.09E+00;1.09E+00;1.10E+00;1.11E+00;1.34E+00;1.24E+00;1.27E+00;1.27E+00;9.46E-01;8.77E-01;6.67E-01;5.45E-01;4.39E-01;2.46E-01	2401;3242;9241;9679;10425;13437;13596;17256;21292;23972;31010;35242;39673;43808;45984;51759;62430;74686	4.86E-01;8.69E-01;6.86E-01;9.39E-01;1.24E+00;1.29E+00;1.71E+00;1.67E+00;1.62E+00;1.74E+00;1.42E+00;1.42E+00;1.40E+00;1.43E+00;1.66E+00;1.57E+00;1.05E+00;2.83E-01
CT45A5	-1.81002	1.05578	18	TATCAGCATTAATTTCTCGT;TTCACTGGTTTCAGCAAAGA;AAAATCTTCGAAATGCTTGA;ATTAATTTCTCGTTGGCTTT;TCCTTGTTTCCTTGCCAACA;CCTTGCTGCTTCCTTGATGA;AGAGGATGGCCCTGTTGGCA;AGGCTGTTTCTCTGCATTCT;TGCTATTCCACCCAGCCAAT;CATCAAGGAAGCAGCAAGGT;GATGGGATGATGCAGAAACC;CGAAGGACTGTCACATTCCC;GTTTCACCAGAGCTTATGAC;GTCATCTCCAGAGAAACTGC;CTGGTAACGTTTCCTCCCAC;GTATCAGAAAAGGCAGAGGA;GCATGTCCTGTCATAAGCTC;CTTCGTATCAGAAAAGGCAG	-4.25;-3.1;-3.03;-2.86;-2.76;-2.65;-2.43;-2.16;-1.89;-1.44;-1.31;-1.26;-0.99;-0.71;-0.69;-0.42;-0.34;-0.29	4274;23929;25703;29448;31440;33634;37769;42200;46432;53470;55435;56151;60186;63846;64005;67017;67763;68201	4.22E-01;1.40E+00;1.15E+00;1.10E+00;9.65E-01;8.74E-01;8.75E-01;8.87E-01;8.90E-01;1.04E+00;9.19E-01;7.71E-01;7.51E-01;7.10E-01;6.12E-01;5.62E-01;6.34E-01;9.93E-01	9241;9679;10425;13437;13596;17256;21292;22007;23972;31010;35242;39673;43808;45984;47996;51759;53513;73164	6.06E-01;5.49E-01;6.43E-01;7.16E-01;9.35E-01;9.57E-01;9.58E-01;1.18E+00;1.34E+00;1.11E+00;1.10E+00;1.09E+00;1.09E+00;1.25E+00;1.46E+00;1.57E+00;1.98E+00;4.44E-01
CT45A7	-1.81002	1.05578	18	TATCAGCATTAATTTCTCGT;TTCACTGGTTTCAGCAAAGA;AAAATCTTCGAAATGCTTGA;ATTAATTTCTCGTTGGCTTT;TCCTTGTTTCCTTGCCAACA;CCTTGCTGCTTCCTTGATGA;AGAGGATGGCCCTGTTGGCA;AGGCTGTTTCTCTGCATTCT;TGCTATTCCACCCAGCCAAT;CATCAAGGAAGCAGCAAGGT;GATGGGATGATGCAGAAACC;CGAAGGACTGTCACATTCCC;GTTTCACCAGAGCTTATGAC;GTCATCTCCAGAGAAACTGC;CTGGTAACGTTTCCTCCCAC;GTATCAGAAAAGGCAGAGGA;GCATGTCCTGTCATAAGCTC;CTTCGTATCAGAAAAGGCAG	-4.25;-3.1;-3.03;-2.86;-2.76;-2.65;-2.43;-2.16;-1.89;-1.44;-1.31;-1.26;-0.99;-0.71;-0.69;-0.42;-0.34;-0.29	4274;23929;25703;29448;31440;33634;37769;42200;46432;53470;55435;56151;60186;63846;64005;67017;67763;68201	4.22E-01;1.40E+00;1.15E+00;1.10E+00;9.65E-01;8.74E-01;8.75E-01;8.87E-01;8.90E-01;1.04E+00;9.19E-01;7.71E-01;7.51E-01;7.10E-01;6.12E-01;5.62E-01;6.34E-01;9.93E-01	9241;9679;10425;13437;13596;17256;21292;22007;23972;31010;35242;39673;43808;45984;47996;51759;53513;73164	6.06E-01;5.49E-01;6.43E-01;7.16E-01;9.35E-01;9.57E-01;9.58E-01;1.18E+00;1.34E+00;1.11E+00;1.10E+00;1.09E+00;1.09E+00;1.25E+00;1.46E+00;1.57E+00;1.98E+00;4.44E-01
CT45A6	-1.81002	1.05578	18	TATCAGCATTAATTTCTCGT;TTCACTGGTTTCAGCAAAGA;AAAATCTTCGAAATGCTTGA;ATTAATTTCTCGTTGGCTTT;TCCTTGTTTCCTTGCCAACA;CCTTGCTGCTTCCTTGATGA;AGAGGATGGCCCTGTTGGCA;AGGCTGTTTCTCTGCATTCT;TGCTATTCCACCCAGCCAAT;CATCAAGGAAGCAGCAAGGT;GATGGGATGATGCAGAAACC;CGAAGGACTGTCACATTCCC;GTTTCACCAGAGCTTATGAC;GTCATCTCCAGAGAAACTGC;CTGGTAACGTTTCCTCCCAC;GTATCAGAAAAGGCAGAGGA;GCATGTCCTGTCATAAGCTC;CTTCGTATCAGAAAAGGCAG	-4.25;-3.1;-3.03;-2.86;-2.76;-2.65;-2.43;-2.16;-1.89;-1.44;-1.31;-1.26;-0.99;-0.71;-0.69;-0.42;-0.34;-0.29	4274;23929;25703;29448;31440;33634;37769;42200;46432;53470;55435;56151;60186;63846;64005;67017;67763;68201	4.22E-01;1.40E+00;1.15E+00;1.10E+00;9.65E-01;8.74E-01;8.75E-01;8.87E-01;8.90E-01;1.04E+00;9.19E-01;7.71E-01;7.51E-01;7.10E-01;6.12E-01;5.62E-01;6.34E-01;9.93E-01	9241;9679;10425;13437;13596;17256;21292;22007;23972;31010;35242;39673;43808;45984;47996;51759;53513;73164	6.06E-01;5.49E-01;6.43E-01;7.16E-01;9.35E-01;9.57E-01;9.58E-01;1.18E+00;1.34E+00;1.11E+00;1.10E+00;1.09E+00;1.09E+00;1.25E+00;1.46E+00;1.57E+00;1.98E+00;4.44E-01
FTCDNL1	-0.964253	0.804422	2	GGAATCTCACTCTGTCACCC;TCCTGCCTCAGCCTCCCGAG	-1.53;-0.4	52067;67218	3.56E-01;1.23E-01	10224;25378	6.40E-01;9.69E-01
VMO1	-2.46944	0.57651	4	GAGCCGCTGTGGTGTCGCGG;GGTCATCGAAGTGACCAGCG;AGTGGCTTTCTCGCTTCGCG;CGTCCTAGGCAATACGCACG	-4.27;-2.26;-1.83;-1.52	4100;40621;47391;52233	7.45E-01;4.28E-01;4.49E-01;6.84E-01	25209;30051;36820;73337	3.98E-01;4.71E-01;6.47E-01;9.46E-02
ATP5C1	-3.15467	0.878701	4	CAAGTCTATGAAAATGGTAG;TATTTCGAACTTGAATCCTG;ATGAAAAAGCTGATATCAAG;ACCACACAGTCCTCGATCTG	-3.68;-3.6;-3.08;-2.26	12066;13594;24448;40569	4.26E-01;9.01E-01;1.06E+00;1.12E+00	36873;53012;63839;65394	5.63E-01;5.53E-01;4.05E-01;2.94E-01
LOC105371393	-1.91411	0.392609	1	GCCGAGGCGGGCAGATCACG	-1.91	46089	0.225	31359	0.393
TSPY18P	-2.42377	0.392743	2	GACCCCAGAGTCTGCACTGG;CAGGATGGAGGCTGTACAGG	-2.95;-1.9	27403;46359	3.40E-01;4.46E-01	31084;50039	3.18E-01;3.79E-01
LOC105371399	-0.533336	0.82455	1	CAAGGCAGGCAGATCACCTG	-0.53	65843	0.0705	11599	0.825
NPC2	-1.29473	0.722645	4	CAACCCTGCCAGCTGAGCAA;GAGCCTGATGGTTGTAAGAG;CCGGTGCAGTTCAAGGACTG;TATTCAGTCTAAAAGCAGCA	-3.09;-2.43;-2.15;2.49	24290;37767;42299;76223	3.92E-01;4.26E-01;5.29E-01;2.75E-02	1219;35143;39675;53133	1.22E+00;4.33E-01;5.81E-01;6.54E-01
NPC1	-2.72182	0.722207	7	CTGTCTGACTCACTTAACAC;ATATTCGATATCAAGTTACG;ACGCCATGTATGTCATCATG;GAAGGTCTCACTAGGCATCG;AAAGAGTTACAATACTACGT;CAAACTTGTATCATTCAGAG;ATTCCAGCTGGGAATTATCA	-4.26;-3.66;-3.1;-2.6;-2.27;-2.01;-1.16	4245;12539;24048;34672;40389;44509;57639	5.63E-01;6.43E-01;6.26E-01;6.25E-01;7.32E-01;9.69E-01;8.98E-01	19803;32933;37065;42770;53380;64895;73197	5.17E-01;6.23E-01;5.47E-01;5.34E-01;5.01E-01;4.06E-01;1.71E-01
LINC00327	-1.91411	0.392609	1	GCCGAGGCGGGCAGATCACG	-1.91	46089	0.225	31359	0.393
C3orf58	-2.39743	0.513499	4	CAGTTCGTTGCGCTGCCAAG;GCAGACGCACGTCGCCGTTG;AGTACACGTTCTTCACGTTG;TTTCCATTAATTGCCAAGCG	-3.88;-2.46;-1.69;-1.56	8833;37278;49450;51640	4.99E-01;4.27E-01;4.24E-01;7.04E-01	25802;27992;40187;68600	4.03E-01;4.95E-01;5.70E-01;2.11E-01
RAB3GAP2	-2.73814	0.791843	6	GAGTAGGAGCTTTCAATGTG;ATCACCATAAGATCATTGGT;AAATACTTCATACATTACAG;GAGGAATTGCAATACGCATG;TTATGTACGCTTCTACACTG;CAAGGCAGGCAGATCACCTG	-4.08;-3.94;-3.69;-2.96;-1.23;-0.53	6267;8076;11857;27138;56654;65843	4.97E-01;9.79E-01;1.36E+00;1.02E+00;4.72E-01;4.23E-01	11599;20788;50321;65580;69367;71179	3.99E-01;5.09E-01;6.28E-01;7.42E-01;4.43E-01;2.20E-01
BHLHA15	-1.68242	0.636768	4	GGCGGCTGGAGAGCAACGAG;CGTGGGGGATGACTTCACGC;GCTGGATGCTGCTGTCACGA;ACGGGTCCCTGCCGAACCCG	-3.07;-1.88;-1.25;-0.52	24762;46539;56271;65964	3.95E-01;4.62E-01;3.77E-01;2.79E-01	11478;21171;30903;52680	4.36E-01;6.26E-01;8.16E-01;6.69E-01
RAB3GAP1	-1.15199	0.790466	5	CGAACTCTAACAGACCAATG;ATGGCAAATTTAAGGCCGGA;TGTCACTAATATATATCCAG;CAAGGCAGGCAGATCACCTG;TCGAAATCAGTTCGTACACC	-3.17;-3.0;-2.56;-0.53;3.51	22501;26257;35281;65843;76776	4.34E-01;4.79E-01;5.52E-01;4.07E-01;1.87E-02	666;11599;42141;51168;54957	1.38E+00;8.61E-01;4.75E-01;4.90E-01;7.45E-01
C3orf52	-2.25398	0.75899	9	GGGATCACCATATCGCTGAA;ATCATCGGGTTCTCTGTACA;TCTGCCTTTCTAGGCTAACA;AGAACACTCAAGAGATGCCT;TGTTGACCAGACCTACTCAG;TGATCACTGTAATGACACCT;GAGCTCCTGTAATAAGAATG;CAAGGCAGGCAGATCACCTG;TGGAGCTCTCGGTGCTCGAG	-5.3;-3.49;-3.45;-2.9;-1.83;-1.48;-0.86;-0.53;-0.45	49;15694;16352;28501;47450;52785;61947;65843;66723	2.25E+00;5.19E-01;7.20E-01;6.33E-01;6.11E-01;5.66E-01;5.20E-01;4.34E-01;5.82E-01	10719;11599;15495;24657;29992;48941;61087;61748;77393	4.22E-01;5.86E-01;7.54E-01;7.20E-01;8.10E-01;5.74E-01;5.16E-01;5.26E-01;2.42E-03
C3orf56	-1.48781	0.635822	4	AGGAGTAGATGACAGGCCAG;GATACGGACTTCCTATGAGG;CTGCCTTGGTGCCTTCAGTG;AGGTGGGTGGGAATTTCATG	-4.65;-1.84;-1.31;1.85	1425;47181;55386;75675	1.16E+00;4.68E-01;3.80E-01;4.01E-02	1767;22056;30261;76017	1.07E+00;6.04E-01;8.37E-01;3.22E-02
DAG1	-1.48343	0.96628	8	ACGGTCACCATCCGGACTCG;GTGGTGCGAATACGAGTAGG;TCTTCTAGGTATCAGCGGCA;GCCGAGGCGGGCAGATCACG;TCGCCCAAGCTAGAGTGCAG;CAGATGATACCACCTCACCA;CAAGGCAGGCAGATCACCTG;GAGAATCGCTTGAATCCGGG	-3.15;-2.26;-2.04;-1.91;-1.41;-1.01;-0.53;0.44	22924;40568;44185;46089;53961;59851;65843;73043	6.93E-01;1.05E+00;8.18E-01;6.27E-01;5.91E-01;5.12E-01;4.15E-01;2.03E-01	4399;11599;17591;23475;31359;33257;36874;54518	5.20E-01;6.25E-01;7.42E-01;8.56E-01;8.91E-01;1.24E+00;1.63E+00;1.22E+00
ETHE1	-2.35653	0.684026	6	AGTGAATACCCACTGCCACG;CCAGGCTGACTTACACATTG;CAGGACTGGGTCGATCAGAA;CCCACACCCACGGATCAACA;GGAATCTCACTCTGTCACCC;TCGCCCAAGCTAGAGTGCAG	-4.65;-3.18;-1.69;-1.68;-1.53;-1.41	1402;22323;49460;49683;52067;53961	1.00E+00;4.95E-01;6.09E-01;4.86E-01;5.68E-01;9.41E-01	23475;25378;27759;27990;55103;76042	5.24E-01;4.83E-01;6.14E-01;9.81E-01;5.01E-01;4.75E-02
SGSM3	-2.45075	0.539544	5	CACACTGCACTGGTTCCTCA;GTTCACCCATAACCACGATG;AGACCCCAAAAACTGCAGCG;GCCGAGGCGGGCAGATCACG;GGCTGCCTGACAGATCGAGA	-4.19;-2.74;-2.58;-1.91;-0.84	4969;31806;35049;46089;62215	6.09E-01;4.62E-01;5.56E-01;5.95E-01;4.75E-01	15227;31359;42393;45636;72470	3.88E-01;4.62E-01;4.74E-01;6.06E-01;1.44E-01
KDM1A	-1.22812	0.748531	4	TGGAATAGCAGAGACTCCGG;TGAGAAGTCATCCGGTCATG;TTTCTGAAACAGGATCGTGT;CTAAATAACTGTGAACTCGG	-3.55;-1.8;-0.82;1.26	14309;47850;62458;75015	3.97E-01;4.76E-01;3.91E-01;5.53E-02	2427;14984;29592;63126	9.43E-01;8.35E-01;8.60E-01;3.55E-01
KDM1B	-2.86905	0.874587	5	ATAGCCAAGACTTATCGATG;CAACACTGGAGTTCTCAGCG;ATTCCTCACATCATCGTCCG;TCGCCCAAGCTAGAGTGCAG;GGAGAGATGATACCATCGGG	-4.34;-4.19;-3.4;-1.41;-1.0	3495;4938;17357;53961;60013	7.27E-01;1.48E+00;1.17E+00;4.47E-01;5.54E-01	17429;23475;60085;72505;73947	3.92E-01;5.07E-01;6.30E-01;6.11E-01;1.00E-01
LOC105369468	-0.533336	0.82455	1	CAAGGCAGGCAGATCACCTG	-0.53	65843	0.0705	11599	0.825
LOC105369469	-0.533336	0.82455	1	CAAGGCAGGCAGATCACCTG	-0.53	65843	0.0705	11599	0.825
SLC36A2	-2.0248	0.610295	4	CAAGCCCTTTATGGACTATG;ATCGTCACTTCCCTATACAT;CCCCTCGCTGTGAAGAACGC;GTAGAGTCGCGAGTCCATGG	-4.28;-3.91;-1.47;1.56	4006;8431;53013;75381	7.53E-01;1.25E+00;3.93E-01;4.68E-02	2061;24429;69016;73433	1.01E+00;5.53E-01;5.11E-01;9.23E-02
OR1S1	-3.03561	0.816373	4	TCAGAGCAATAATATTACTG;CGTTCCCAATCACAGTGACC;CAGCAAAGGATAGATTGGCA;GAATTGTATAATTCAGAGGG	-4.0;-3.79;-3.04;-1.31	7220;10230;25347;55420	5.56E-01;1.10E+00;1.03E+00;5.81E-01	22022;52095;67218;70213	3.80E-01;5.36E-01;4.62E-01;1.70E-01
OR1S2	-2.81211	0.788148	5	TCAGAGCAATAATATTACTG;TCAGGAAAAGCACAAAGAGG;TGAACTATACAACTTTCATG;AGCTCTCATAAGAGATGGAT;CAGCAAAGGATAGGTAGGCA	-4.0;-3.81;-3.58;-1.66;-1.02	7220;9989;13955;50107;59686	5.01E-01;9.59E-01;1.41E+00;5.10E-01;5.66E-01	17756;27335;63491;67435;70213	3.93E-01;4.72E-01;7.48E-01;4.30E-01;2.13E-01
HIST1H3H	-3.06959	0.787811	4	GGAGCTCTGGAAGCGCAAGT;TCTGGTAGCGGCGAATCTCG;AAGCCCCATCGCTATCGGCC;ATGGGGCTTCTTGACACCGC	-4.1;-3.38;-2.49;-2.31	6010;17825;36634;39681	6.13E-01;7.25E-01;6.51E-01;1.16E+00	37761;40808;59615;71427	5.81E-01;4.28E-01;3.77E-01;1.40E-01
FCER1G	-0.331336	1.58449	4	CCTCCTCTACTGTCGACTGA;TACCTGCTTGTTCAACCAAA;ATTCCAGATCCAAGTGCGAA;TCCAGGATATAGCAGAGCTG	-0.99;-0.97;0.07;0.57	60156;60402;71302;73498	1.46E+00;7.53E-01;6.06E-01;9.08E-02	3944;6140;17040;17286	7.59E-01;1.50E+00;1.48E+00;2.61E+00
BTG4	-1.99941	0.493154	4	ACATACTAGCTCTCACCTGA;TTGAAACATACAGAAGTCAC;GTCTGATGAGGCTCTACTAA;ATCCCTTTGAAGTATGCTGT	-3.6;-3.14;-2.0;0.74	13493;23086;44806;73980	4.06E-01;5.81E-01;4.86E-01;7.94E-02	3462;32636;54346;63933	8.07E-01;4.48E-01;3.85E-01;3.33E-01
BTG3	-2.05701	0.476252	4	TATCCAGAAAAACCATCGAA;GGATCCTGAATGATAATCAG;ACCGACAGCACACCTCACAT;AATGGAAGTGAAACCCAGTT	-3.7;-3.27;-0.97;-0.29	11769;20248;60499;68209	4.31E-01;6.50E-01;3.80E-01;2.21E-01	9233;16943;57188;65672	4.87E-01;7.56E-01;3.75E-01;2.86E-01
BTG2	-1.6752	0.682992	4	GAGGCTTAAGGTCTTCAGCG;TTTCCCGAAAAGCCGTCCAA;GAAGGGAACCGACATGCTCC;CTCATAGGGGTCCACCCACA	-3.71;-1.12;-1.04;-0.83	11579;58301;59424;62306	4.34E-01;6.82E-01;3.76E-01;3.78E-01	15136;18018;19141;65874	3.90E-01;7.18E-01;1.34E+00;2.81E-01
BTG1	-3.22792	0.973215	4	CTCCAAGTTTCTCCGCACCA;GATCTCGCCTATCATGGTGG;AATGGATCCTCTGATTGGAC;TTCTGTAGGACACTTCATAG	-4.05;-3.9;-3.3;-1.66	6557;8644;19520;50040	5.85E-01;1.23E+00;1.32E+00;7.59E-01	27402;57922;68798;70889	4.18E-01;6.71E-01;5.04E-01;1.54E-01
LOC102723341	-0.533336	0.82455	1	CAAGGCAGGCAGATCACCTG	-0.53	65843	0.0705	11599	0.825
LOC105370041	-1.02745	0.638575	1	TCATAAGCAGGAGAAACACC	-1.03	59643	0.113	17799	0.639
SRD5A3	-2.14526	0.475266	5	CACGACGTGAATCATGACAT;TCAGCACAGTTAGGCCAACA;GAGCCTTTGATGTCCCCAAG;TTTGCTCAGAATTCTCGGGG;TCCTGCCTCAGCCTCCCGAG	-3.68;-3.2;-1.76;-1.68;-0.4	12043;21810;48485;49611;67218	4.03E-01;5.32E-01;4.65E-01;5.19E-01;3.07E-01	10224;27831;28957;55631;65412	4.26E-01;4.69E-01;6.88E-01;4.26E-01;3.67E-01
SRD5A2	-2.55805	0.569074	4	GTGCTGAATACCCTGATGGG;CCCAGAAGTACCGTCCCAGG;GGAGGGCTTCGCGACGTACA;CCAGCTATACTCATTCTCAG	-4.03;-3.29;-1.46;-1.46	6824;19915;53166;53212	5.73E-01;6.60E-01;3.92E-01;6.52E-01	24230;24276;57539;70620	3.91E-01;5.56E-01;3.75E-01;1.60E-01
SRD5A1	-2.4169	0.555792	5	GACGTTACCGATGCCCGTAG;CACTCACCTATTAGAAAACG;CGTCAGACGAACTCAGTGTA;GGAATCTCACTCTGTCACCC;GCCATTGTACACGCCAACAG	-4.35;-3.51;-2.02;-1.53;-0.68	3423;15254;44499;52067;64166	7.34E-01;6.97E-01;4.64E-01;4.75E-01;4.08E-01	13276;25378;32943;62195;74019	3.94E-01;4.86E-01;5.95E-01;3.88E-01;9.81E-02
ARMT1	-2.01181	0.505983	4	AAAGTGATGGAAAATCAAGA;AATACCACAGATCTTAACTA;ACATCAAAGTAATCGATTGG;CAACAAATTTCTCAACCAAG	-3.73;-1.82;-1.6;-0.9	11175;47555;51020;61445	4.42E-01;4.72E-01;4.09E-01;4.02E-01	15997;26422;29887;66253	3.84E-01;5.18E-01;8.50E-01;2.71E-01
GGA1	-3.31853	1.05226	4	ATCACATTCTTCGGCCGTGG;GGAACTTGCCCACTTCGTCG;CCGACTGGCGAGTGACACAG;GAAGAGGGTGAATGCCATCG	-3.9;-3.64;-3.56;-2.17	8575;12757;14204;42018	5.07E-01;9.45E-01;1.70E+00;1.06E+00	35424;63252;64674;68861	5.34E-01;8.72E-01;4.16E-01;2.04E-01
GGA3	-2.16652	0.604141	4	TCCTATCCACAGGAATTGGT;GGAGATTTCATAACGAAGTG;AGGCACGCTCATCGACCTTG;TTTGTAAGAGTTGATGACCC	-2.64;-2.37;-2.29;-1.38	33915;38818;40091;54404	5.07E-01;4.26E-01;5.72E-01;6.13E-01	23038;37351;38626;43528	3.85E-01;4.27E-01;6.04E-01;1.00E+00
GGA2	-2.52562	0.506582	4	TCTAAAGAGCAACCACCCCG;AGCCACAGACCCAAGCATGT;TCTTTCAGGTCGTGTATGAG;AGATGTGCATGAACCACTGT	-3.67;-3.0;-2.59;-0.83	12242;26214;34687;62259	4.23E-01;5.22E-01;7.02E-01;3.79E-01	15183;42744;51209;65188	3.90E-01;4.35E-01;4.07E-01;2.99E-01
LOC101929727	-1.91411	0.392609	1	GCCGAGGCGGGCAGATCACG	-1.91	46089	0.225	31359	0.393
FHOD1	-1.88402	0.581716	5	GCTGAATGTAGAGTCTGTGG;CTTTGGCACGAGACTCAAAG;TTCACTGCACGGATGAACAG;CTGGGTCCGAAGGATCAGCG;CAAGGCAGGCAGATCACCTG	-3.54;-2.42;-1.67;-1.26;-0.53	14567;37857;49923;56236;65843	3.89E-01;4.96E-01;4.71E-01;4.19E-01;3.52E-01	11599;21206;27519;39599;62869	4.07E-01;5.42E-01;7.29E-01;7.77E-01;4.53E-01
FHOD3	-0.990074	1.55372	8	GTCGGCTGTTTGGACAATCG;GGAATCTCACTCTGTCACCC;TCGCCCAAGCTAGAGTGCAG;CAAGGCAGGCAGATCACCTG;TCCTGCCTCAGCCTCCCGAG;GTGACAGCCTGAATTAGGAG;ACAGGAATTCTCTGCAGCGT;GAAAAACTATACAACTCCAG	-4.35;-1.53;-1.41;-0.53;-0.4;0.04;0.05;0.21	3403;52067;53961;65843;67218;71106;71192;72072	5.91E-01;1.81E+00;1.31E+00;1.74E+00;1.20E+00;9.50E-01;4.46E-01;2.50E-01	5370;6250;6336;10224;11599;23475;25378;74047	4.74E-01;9.58E-01;1.70E+00;1.92E+00;2.59E+00;1.98E+00;2.66E+00;1.56E-01
GJC2	-1.38402	0.686208	4	GTAGCCCAGGTACATGACCG;GAGGCGTGCACTAAGGCGGT;GAGCCACACCTTGCCCACGA;GTCGCGCCCTACTGAAAAGA	-4.14;-1.93;-0.75;1.29	5472;45782;63322;75062	6.44E-01;4.55E-01;3.99E-01;5.42E-02	2380;14120;31669;71959	9.51E-01;8.75E-01;7.91E-01;1.28E-01
GJC3	-3.27866	1.32464	4	CAGGTGGTACTGCAACCCCA;GGGCAACACAGATGTCCCAG;AAACCCATATAGAGGGCGCT;GATTGCAGGTTATACTACCA	-4.76;-4.14;-3.82;-0.4	928;5569;9848;67199	1.34E+00;1.57E+00;2.14E+00;2.46E-01	10243;67605;71875;76512	4.61E-01;1.13E+00;6.39E-01;2.10E-02
GJC1	-2.12833	0.464571	4	TGCTGCACACATAAAACGGG;GAACACCCAGAAGCGTACAT;AATGCGCTGGAAACAACACC;CATCTTCCCGAATCCGTCGT	-4.25;-2.57;-1.02;-0.68	4370;35228;59717;64184	7.22E-01;4.33E-01;3.77E-01;3.26E-01	13258;17725;42195;73072	4.09E-01;7.28E-01;5.31E-01;1.01E-01
PSMB9	-3.0065	0.759338	4	TCCCAGGGTTCCATATACCT;TATCAGCTATAAATATCGAG;GTAGATGCGCTCGTGCAGCG;CCAGACCCATTACCCCGGTG	-4.31;-3.31;-2.93;-1.47	3762;19466;27775;52918	7.76E-01;6.73E-01;9.27E-01;6.61E-01	24524;49650;57958;73683	3.93E-01;4.98E-01;3.75E-01;8.64E-02
PSMB8	-2.76465	0.684213	4	ACTAATGTAGGACCCAGCTG;AAGGAACGTTCAGATTGAGA;TGGAGAACGTATTTCAGTGT;CCAGAGCTCGCTTTACCCCG	-4.52;-2.88;-1.97;-1.69	2123;28945;45261;49472	9.96E-01;4.83E-01;4.79E-01;7.78E-01	27970;32181;48497;75320	4.24E-01;4.51E-01;4.35E-01;4.82E-02
PSMB7	-2.14798	0.451606	4	ACCAGGTATCAAGGTTACAT;AACTGGCACGACCATCGCTG;GAAAACGTTACACTCACCCA;GCAGATACAAGAGCAACTGA	-3.61;-2.67;-2.27;-0.05	13407;33307;40429;70110	4.07E-01;4.43E-01;5.65E-01;1.73E-01	7332;36997;44113;64037	5.51E-01;4.28E-01;4.97E-01;3.30E-01
PSMB6	-2.32156	0.457554	4	AAAGCCGAGAAGTTTCCACT;AGTCACTCGATTGGCGATGT;CCTACCAGCTCGGTTTCCAC;GGAGATGTGTTACCGATACC	-3.25;-2.85;-2.2;-0.98	20636;29490;41584;60289	3.76E-01;4.77E-01;5.42E-01;4.35E-01	17153;35876;47950;56794	3.79E-01;4.31E-01;4.42E-01;5.39E-01
PSMB5	-2.8161	0.664886	4	TTTGTACTGATACACCATGT;GCTTCATGGAACAACCACCC;CCGCTACCGGTGAACCAGCG;ATCTGTGGCTGGGATAAGAG	-3.56;-3.13;-2.37;-2.2	14207;23338;38798;41455	3.98E-01;5.75E-01;6.00E-01;1.09E+00	35974;38644;54121;63255	5.45E-01;4.26E-01;3.86E-01;3.52E-01
PSMB4	-2.15033	0.575917	4	CGCCCTCGAACTTAACGCCG;GAAATCAGCGTAGTCGCCAG;GAAACGAGCCAAGGAGCCGT;AGCATAGCCTCCGATGACCA	-2.85;-2.44;-1.75;-1.57	29614;37578;48608;51504	4.43E-01;4.27E-01;4.34E-01;7.09E-01	25938;28839;39868;47812	4.04E-01;4.84E-01;5.77E-01;8.38E-01
PSMB3	-3.14772	0.877546	4	CTCACCGTTTCTCATACAAG;CTATAACGGAGGGGCCGTCA;AAAGGTCTTCGGGTCCAACC;TGTATGAGTTGAAGGAAGGT	-3.63;-3.37;-3.0;-2.6	13064;18046;26345;34636	4.12E-01;7.17E-01;9.83E-01;1.40E+00	42789;51102;59408;64369	7.03E-01;5.20E-01;3.76E-01;3.21E-01
PSMB2	-2.28356	0.491528	4	AGGGCCAGCGCTGTATTACA;GAGGAGGTTCACATGATATG;AAGATATTACTCCTGTGTGT;TTTATAAGATGCGAAATGGT	-3.45;-2.22;-1.95;-1.51	16430;41144;45461;52394	3.82E-01;4.29E-01;4.76E-01;6.79E-01	25050;31972;36295;61003	3.97E-01;4.53E-01;6.60E-01;4.14E-01
PSMB1	-1.79345	0.729831	4	GTATACAGCTTTGATCCAGT;TCTGATACTCGATTGAGTGA;ATAATAAGGCCATGACTACG;TTACCCTCCGTTGAAAACGT	-2.24;-1.95;-1.94;-1.04	40880;45576;45657;59410	6.53E-01;4.54E-01;4.73E-01;4.60E-01	18032;31792;31852;36572	3.76E-01;4.54E-01;7.86E-01;1.30E+00
LMBR1L	-2.10365	0.526331	4	AGCCATTGTGGACAAGAACA;GAGCCACACACCATGGATGA;CAAGGAATACCACATACCCG;GGGCCGGGTCTATGAGACAG	-4.42;-3.16;-2.33;1.49	2835;22793;39416;75301	8.83E-01;5.87E-01;5.87E-01;4.87E-02	2141;38044;54667;74607	9.93E-01;4.26E-01;3.83E-01;6.48E-02
TDGF1	-2.09439	0.597491	4	ATTTCTAAAGTCTTTGAACT;GCCATGATCCAAATCACACT;CTGTGCTGTATCCCCATGGG;AAGGCCAGGTATCCCCGAGA	-3.32;-3.18;-3.13;1.25	19188;22201;23407;75007	3.75E-01;6.00E-01;1.11E+00;5.55E-02	2435;54015;55241;58275	9.42E-01;5.73E-01;3.81E-01;4.94E-01
SETP7	-3.02981	0.479816	1	AGATTTCCATTTGATTTCGG	-3.03	25654	0.48	51802	0.175
SETP6	-3.02981	0.479816	1	AGATTTCCATTTGATTTCGG	-3.03	25654	0.48	51802	0.175
SETP3	-2.3535	0.304493	1	ACTTAATGAACAAGCCAGTG	-2.35	39012	0.298	38413	0.304
SETP2	-2.3535	0.304493	1	ACTTAATGAACAAGCCAGTG	-2.35	39012	0.298	38413	0.304
SETP8	-0.483389	0.845648	1	CAAAGTCCACCAAAATCAAA	-0.48	66393	0.0668	11049	0.846
LTN1	-2.52163	0.500246	4	AGAGACACAGAAACTGTGAA;ACGTGTACTTGGTAATACGT;AAAGCATGTTTATCTGAACT;CTATCAACTGTGATTCGTGA	-3.83;-3.06;-2.23;-0.97	9667;24912;41132;60451	4.75E-01;5.44E-01;5.51E-01;4.30E-01	16991;36310;52511;67779	3.79E-01;4.29E-01;3.96E-01;2.32E-01
LOC101928236	-1.48526	0.807487	5	GTGAAACGAATGCTCCATGT;GCCGAGGCGGGCAGATCACG;GGAATCTCACTCTGTCACCC;CAAGGCAGGCAGATCACCTG;TCCTGCCTCAGCCTCCCGAG	-3.05;-1.91;-1.53;-0.53;-0.4	25193;46089;52067;65843;67218	4.72E-01;6.29E-01;4.86E-01;4.07E-01;3.07E-01	10224;11599;25378;31359;52231	4.26E-01;8.61E-01;7.98E-01;1.10E+00;8.55E-01
C9orf147	-1.47257	0.707196	4	GCTGCTATGGATATGCTGGG;GACGTTTATGCAATTAAACC;GGAATCTCACTCTGTCACCC;TCAGTGGTGGACTGATATTG	-2.97;-1.89;-1.53;0.49	26984;46531;52067;73212	4.14E-01;4.62E-01;4.00E-01;9.76E-02	4230;25378;30915;50473	7.34E-01;5.36E-01;8.16E-01;7.44E-01
TRIML2	-2.80069	0.87344	4	AGAACTATGAGATTGAGACA;TCTTACCTTGAGCAATGCCA;CATGGTGTGTGGGATACAAG;ACATCACAGAACAGCCGTGT	-5.05;-2.7;-2.16;-1.29	223;32571;42112;55754	1.94E+00;4.48E-01;5.32E-01;5.71E-01	21688;35330;44871;77219	3.79E-01;4.33E-01;4.85E-01;4.99E-03
LOC101928231	-1.03094	0.781511	2	GGAATCTCACTCTGTCACCC;CAAGGCAGGCAGATCACCTG	-1.53;-0.53	52067;65843	3.56E-01;1.41E-01	11599;25378	5.94E-01;9.69E-01
TRIML1	-0.386503	1.01467	4	GGCTGTACTAACCCATGAGA;TCCAGTCAAACGAGCGTCTG;GATGCACTCTGTTTGCACCA;CACGAGATAGGCATTAGCTG	-3.4;-1.56;-1.55;4.97	17424;51551;51752;77281	3.78E-01;5.27E-01;4.02E-01;3.59E-03	161;25690;25891;59997	2.08E+00;5.30E-01;1.00E+00;4.43E-01
NACC2	-1.60557	0.717276	6	TATGCTTCACCCCTGCACAC;GCGAGCTCACCTTGAACATG;GGAATCTCACTCTGTCACCC;CACCTCGTACCACAACGAGG;TCCTGCCTCAGCCTCCCGAG;ACCCCGTAGTAGGAGACACG	-4.1;-3.53;-1.53;-0.88;-0.4;0.81	5904;14711;52067;61721;67218;74164	5.12E-01;6.33E-01;6.70E-01;6.03E-01;4.09E-01;1.13E-01	3278;10224;15721;25378;62749;71542	6.89E-01;8.29E-01;1.07E+00;1.11E+00;4.01E-01;2.06E-01
VPS13D	-2.07523	0.588116	8	AGAGAACGGTTCACTACCAG;ACATCCGAGAGAATACTCGA;AGATCCACGACAACTAACAC;AAGGGGCGATCAACAAACCG;GCCGAGGCGGGCAGATCACG;GGAATCTCACTCTGTCACCC;CAAGGCAGGCAGATCACCTG;GAGAATCGCTTGAATCCGGG	-3.51;-3.38;-3.19;-2.99;-1.91;-1.53;-0.53;0.44	15207;17931;21926;26560;46089;52067;65843;73043	4.68E-01;5.10E-01;6.19E-01;7.44E-01;5.57E-01;5.56E-01;4.15E-01;2.03E-01	4399;11599;25378;31359;50862;55528;59532;62247	5.20E-01;6.25E-01;5.68E-01;6.27E-01;5.58E-01;5.16E-01;5.32E-01;7.59E-01
NACC1	-2.28464	0.46901	4	GGCCGGCTGAGCATGAACGT;GATGCGATTTCGGGACTCGG;AGCCCGATGTCTGCGCCACG;GTACTGTGACGTGTCAGTGG	-3.72;-3.45;-2.18;0.21	11339;16390;41914;72103	4.39E-01;7.77E-01;5.36E-01;1.24E-01	5339;35528;61061;66115	6.53E-01;4.32E-01;3.82E-01;2.75E-01
VPS13A	-2.7629	0.745244	5	ATTAGTAGTAACTCCACTAG;TATGGATTATATCCGAACCA;TCAATAATATACAGTAGACC;AATGGAAGACCTGTTAACGC;TCCTGCCTCAGCCTCCCGAG	-3.67;-3.52;-3.33;-2.9;-0.4	12286;15100;18965;28469;67218	4.01E-01;7.03E-01;1.08E+00;1.24E+00;3.07E-01	10224;48967;58463;62354;65164	4.26E-01;7.02E-01;5.88E-01;3.88E-01;3.75E-01
SH3KBP1	-1.03216	1.03765	6	GGGAGGGACAGATCAACGGC;GTAACTTCACGAAGTTATCG;GCCGAGGCGGGCAGATCACG;GAAAGTTGGCGACATCATAG;GAGAATCGCTTGAATCCGGG;TGGGTCCGCTGACACACACC	-4.04;-3.24;-1.91;0.17;0.44;2.39	6740;20894;46089;71843;73043;76144	4.80E-01;5.08E-01;5.53E-01;1.24E+00;5.95E-01;4.40E-02	1298;4399;5599;31359;56562;70714	1.03E+00;1.42E+00;2.22E+00;8.45E-01;4.73E-01;2.37E-01
VPS13C	-1.80822	0.543127	4	TTCATACCAATGGTCGACGA;TAAATTTGAAACCAATCCGG;GAGAACATTTGACTTAACTG;AGAAAGGTTGCACTGAAACG	-3.43;-2.53;-1.57;0.3	16862;35879;51442;72493	3.80E-01;4.31E-01;4.05E-01;1.15E-01	4949;26000;41578;60588	6.78E-01;5.25E-01;5.43E-01;4.26E-01
VPS13B	-2.49905	0.577725	6	GAAACCTCATCTCGCTACAG;GCTGATGGGTCGAACCAACA;TTGACCCAATCTTATATACG;TGCAACCCATAGGTTCCACT;GCCGAGGCGGGCAGATCACG;CAAGGCAGGCAGATCACCTG	-3.87;-3.15;-2.78;-2.74;-1.91;-0.53	9069;22882;31013;31799;46089;65843	4.24E-01;4.91E-01;5.58E-01;8.29E-01;7.41E-01;4.23E-01	11599;31359;45643;46447;54560;68385	3.99E-01;5.11E-01;5.47E-01;5.07E-01;5.12E-01;3.24E-01
BEX5	-0.347965	1.20513	4	TGATATGGAACGGTTCATGG;GCCTGGAGGAAATGTTAAAG;CACATCCTCTCCAAAACCCG;ATTCACCACCTCCTAAAGCG	-2.59;-1.85;0.32;2.74	34699;47054;72568;76370	5.21E-01;4.67E-01;6.84E-01;2.42E-02	1072;4874;30383;42759	1.27E+00;1.68E+00;8.33E-01;1.03E+00
BEX4	-1.65707	0.641016	4	CCTGGAGGAAATATCAGGCG;AATGCCCAACAAGAAAACGA;CTAGCGGCAAACAATCTCAA;GAAGAATCCCGCCATTTGGG	-3.86;-1.46;-0.84;-0.47	9212;53203;62185;66491	4.88E-01;5.57E-01;3.89E-01;2.65E-01	10951;15257;24239;68223	4.46E-01;8.23E-01;1.07E+00;2.20E-01
BEX3	-0.482546	1.49329	4	GCAGCCTATGCAGAATGGAG;CAGCCTGCAGGAAATCGACG;CAGATCAATGATGGGATGGG;TATGGCCCATCGAAAATTAG	-1.25;-0.84;0.06;0.1	56409;62178;71213;71477	1.23E+00;8.23E-01;6.02E-01;1.39E-01	5965;6229;15264;21033	6.16E-01;1.48E+00;1.61E+00;2.26E+00
BEX2	-1.38399	0.781083	4	AGCGTTAAACAATCTCATCG;ATAGATGGGACATAATGCAT;CAGTATTCACTAACATTCAA;TGCCTAGAGGAAACCGTAGG	-2.99;-2.25;-0.29;-0.01	26591;40793;68198;70415	4.10E-01;4.28E-01;4.87E-01;1.65E-01	7027;9244;36649;50851	5.64E-01;1.18E+00;6.51E-01;7.31E-01
BEX1	-1.42157	0.818641	4	GTGTGCCTAGAGGAAATCGT;AGCAGTAAACAGTCTCAGCA;ATTCACCAGCATCCAAAGGG;ATAGATGGGATATGATGCAT	-2.43;-1.9;-0.73;-0.63	37743;46394;63566;64735	5.81E-01;4.61E-01;4.02E-01;3.11E-01	12707;13876;31048;39714	4.16E-01;8.87E-01;8.11E-01;1.16E+00
TMEM160	-2.89457	0.694787	4	GGTCGCTACTGCCGCCTCAG;GGCAGCGCCTCGTACGCCGT;AGTGTCCGAGCTGGATCGTG;GAAAAGCGCACGAGACAGGT	-4.01;-2.82;-2.82;-1.93	7037;30114;30280;45897	5.64E-01;4.70E-01;8.37E-01;9.09E-01	31536;47143;47346;70402	4.69E-01;4.68E-01;4.49E-01;1.66E-01
TMEM163	-2.67684	0.695154	6	AGAGGCGCTGTACCTCATAA;TCTGTCATCCATATGTATAG;CCTGTGGCGTTACAGCAACG;GGCTTCGTGAGGTTTCAGGC;GGAATCTCACTCTGTCACCC;CAAGGCAGGCAGATCACCTG	-4.04;-3.57;-3.52;-2.87;-1.53;-0.53	6657;14046;15093;29172;52067;65843	4.83E-01;6.54E-01;1.11E+00;9.31E-01;5.68E-01;4.23E-01	11599;25378;48294;62350;63408;70785	3.99E-01;4.83E-01;5.87E-01;6.21E-01;3.98E-01;2.34E-01
TMEM165	-1.14883	0.993812	6	CAGATGAAGACCTTAGCCAC;CGGCCCGCTCACCTCGACCC;GGAATCTCACTCTGTCACCC;CAAGGCAGGCAGATCACCTG;CATAGTATGTATAGACCCTG;CTTAAAGATGAGCCCTGATG	-4.22;-2.49;-1.53;-0.53;0.74;1.13	4651;36730;52067;65843;73985;74808	5.78E-01;5.89E-01;6.70E-01;7.55E-01;6.71E-01;9.01E-02	2634;3457;11599;25378;40728;72792	7.65E-01;1.60E+00;1.38E+00;1.11E+00;9.41E-01;1.61E-01
TMEM164	5.59373	6.65665	4	AGTAAATCTCCAATTCAAAG;CATCCTGAGGCAGACGAAGG;ACGACGATAGCTCCCCGACA;CCTGTGCCTGACCTTCGGGG	4.56;5.84;5.95;6.02	77179;77377;77385;77393	6.82E+00;5.39E+00;2.54E+00;1.08E-03	49;57;65;263	2.60E+00;5.50E+00;8.65E+00;9.89E+00
EVI2A	-1.94865	0.645893	4	GGACTGTTGCTGACGACAGA;AAGCAAACTATACCCGTCTG;TTACCTAGCTAGTATAGGTA;CCCACGGACATGGAACACAC	-2.48;-2.3;-1.9;-1.11	36791;39895;46298;58396	5.61E-01;4.27E-01;4.64E-01;4.90E-01	19046;31144;37547;40651	3.75E-01;4.60E-01;6.29E-01;1.12E+00
TMEM168	-1.85419	0.603273	5	AATTATCAAGAAAACATAGG;CTTAGGTCTATACGTAAGAT;TTAGTAAAGTGGGCCGATGA;TAACTCCTGTACATGTTCTG;GAGAATCGCTTGAATCCGGG	-3.45;-2.42;-1.97;-1.88;0.44	16369;37959;45266;46610;73043	3.88E-01;4.97E-01;4.62E-01;5.83E-01;1.27E-01	4399;30832;32176;39501;61073	6.48E-01;4.61E-01;6.11E-01;7.80E-01;5.16E-01
EVI2B	-2.01455	0.604713	5	GAGGTATAGACAGCTGGTGT;CAACTGTCAAAAATTCACCT;GTATAGACAAATGACTTTGG;TGTTATCCATACAAATGTCA;CAAGGCAGGCAGATCACCTG	-2.94;-2.59;-2.58;-1.43;-0.53	27577;34779;35021;53584;65843	5.14E-01;4.72E-01;5.57E-01;4.52E-01;3.52E-01	11599;23858;42404;42646;49881	4.07E-01;5.02E-01;4.74E-01;6.85E-01;9.55E-01
FOXN1	-0.71705	1.26491	4	GCCCTGGTGACGCAATGCGG;GAGCAGTACATATGCTGCAA;ACACTATCAGTACCAGCGAA;TCAGGAAGTTCCTCCCGCAA	-1.55;-1.05;-0.37;0.11	51682;59269;67539;71511	1.01E+00;7.13E-01;4.69E-01;1.38E-01	5931;9903;18173;25760	6.18E-01;1.13E+00;1.40E+00;1.91E+00
FOXN2	0.223109	1.78735	5	AGAAGACTAAAGGAGTATGG;CAAGGCAGGCAGATCACCTG;TCTCCCTCTATGTCATACAA;TGACTCACTGTCCACTAGAG;CATAAACACTGACCTTGCCA	-4.15;-0.53;0.0;2.03;3.77	5376;65843;70797;75836;76900	5.85E-01;1.61E+00;1.25E+00;1.02E+00;1.52E-02	542;1606;6804;11599;72071	1.47E+00;2.39E+00;2.25E+00;2.67E+00;1.56E-01
FOXN3	-1.60403	0.879086	7	CATCGTAGGGCATGTCAGAG;GAGTGATCCAAAATGGAGCG;GCCGAGGCGGGCAGATCACG;TGACATCCGATTAGAAGAGG;TGGACTGAGTCAGTGTTACG;CAAGGCAGGCAGATCACCTG;TCCTGCCTCAGCCTCCCGAG	-2.89;-2.76;-1.91;-1.9;-0.84;-0.53;-0.4	28764;31386;46089;46368;62229;65843;67218	7.95E-01;5.91E-01;7.03E-01;5.37E-01;5.66E-01;4.02E-01;4.30E-01	10224;11599;15213;31074;31359;46056;48678	4.03E-01;6.79E-01;9.56E-01;7.11E-01;1.09E+00;9.01E-01;1.41E+00
NICN1	-1.39314	0.863534	5	CGGAGCTACGCCTGATTCTG;CCTCGAAGGGAGCGACGCTG;TGTGTGCTGAGGTGTACTGA;CAAGGCAGGCAGATCACCTG;AATGCCTGACCCACACAGTG	-2.81;-2.67;-0.96;-0.53;0.01	30463;33175;60631;65843;70884	5.75E-01;4.65E-01;6.46E-01;4.07E-01;1.92E-01	6558;11599;16811;44250;46959	5.27E-01;8.61E-01;1.20E+00;6.41E-01;1.09E+00
COL14A1	-1.83561	0.710745	6	AATTCTATAGCCTTTCACCG;TAACAGTGCTCGATTAACCT;GTTGTTATAGAATCCCTCCA;GGAATCTCACTCTGTCACCC;GGGCATCCCAAAGGTTATCG;CAAGGCAGGCAGATCACCTG	-2.86;-2.74;-2.49;-1.53;-0.86;-0.53	29414;31766;36716;52067;61891;65843	6.80E-01;5.15E-01;5.09E-01;4.83E-01;4.06E-01;4.23E-01	11599;15551;25378;40720;45659;48051	3.99E-01;6.08E-01;6.70E-01;5.89E-01;7.56E-01;1.24E+00
OR4D12P	-0.265841	0.935066	1	GATCCTCTGAGAGTCCCAGG	-0.27	68449	0.0536	8993	0.935
TAP1	-3.8533	1.82744	4	AGTTCGAAGCTTTGCCAACG;CATCATGTCTCGGGTAACAG;GCCATGCGAGAGAAGCTCCG;GGCTCCAAGAGCGAAAACGC	-4.94;-4.31;-4.08;-2.08	402;3790;6177;43416	1.69E+00;1.89E+00;2.73E+00;1.01E+00	34026;71263;73652;77040	5.09E-01;1.49E+00;7.74E-01;9.02E-03
TAP2	-2.41984	0.736356	4	ACAACAAAGTCTTGATGTGG;GTTGATTCGAGACATGGTGT;CATGCCCTTCACAATAGCAG;ATCCCCATATATGTATACCA	-4.31;-4.14;-0.96;-0.28	3795;5550;60635;68377	7.73E-01;1.58E+00;3.80E-01;2.16E-01	9065;16807;71900;73647	4.92E-01;7.61E-01;6.40E-01;8.73E-02
SNAP91	-3.08745	0.819196	4	GGCAACAAACAGTAGCTGGG;CTAGCTGTAGGGGTAACTAC;AAGAGTATGCCAATACTACA;CCAAAGATATCTAGAGCAGG	-4.17;-3.72;-2.8;-1.66	5096;11389;30602;50074	6.68E-01;1.03E+00;8.26E-01;7.57E-01	27368;46840;66063;72343	4.18E-01;4.65E-01;4.38E-01;1.18E-01
RPL15P3	-2.74813	0.589884	3	CTGGGCTACAAGGCCAAGCA;GCGCGCTTTATCAGGCCGGG;TATAGGATTCGTGTTCGCCG	-4.16;-2.37;-1.71	5271;38680;49161	7.51E-01;4.26E-01;5.92E-01	28279;38772;72171	3.55E-01;4.25E-01;9.18E-02
RPL15P2	-1.71324	0.437507	1	TATAGGATTCGTGTTCGCCG	-1.71	49161	0.197	28279	0.438
RPL15P7	-3.26558	0.749816	2	CTGGGCTACAAGGCCAAGCA;GCGCGCTTTATCAGGCCGGG	-4.16;-2.37	5271;38680	8.97E-01;6.03E-01	38772;72171	3.01E-01;6.12E-02
LOC100288798	-1.91411	0.392609	1	GCCGAGGCGGGCAGATCACG	-1.91	46089	0.225	31359	0.393
RPL15P9	-1.71324	0.437507	1	TATAGGATTCGTGTTCGCCG	-1.71	49161	0.197	28279	0.438
MACROD2	-1.54887	1.17132	16	ACAGCTCTGTCAAATTAACT;ATGGGCAGCAAGACCCTGCG;TAAATGCCTGTTGAGATGCA;ACTGTAGGGCCAATAGCCAG;GCTTGCCAAGAATCACCATG;CAAGTCCCGAGGCTACGTGA;GCCGAGGCGGGCAGATCACG;TTCCATAACATAAAAGCACA;GGAATCTCACTCTGTCACCC;TCGCCCAAGCTAGAGTGCAG;GTGGCAGGCACAATCTCCGG;CATTCCAACAGGAATACCAG;CAAGGCAGGCAGATCACCTG;AACACAGTGTATCCTGCCCA;AACCCCAGGGAATTGTGCTA;AGGTGACATCACATTGCTAG	-4.3;-3.62;-2.81;-2.16;-2.08;-2.07;-1.91;-1.59;-1.53;-1.41;-1.35;-0.64;-0.53;-0.24;0.39;1.06	3847;13224;30358;42196;43529;43650;46089;51098;52067;53961;54739;64680;65843;68699;72884;74687	4.32E-01;5.95E-01;1.28E+00;1.90E+00;1.56E+00;1.19E+00;1.05E+00;1.08E+00;8.85E-01;7.75E-01;6.82E-01;8.11E-01;6.42E-01;5.44E-01;4.21E-01;2.52E-01	2755;4558;8743;11599;12762;22705;23475;25378;26344;31359;33773;33913;35246;47084;64214;73595	4.81E-01;7.50E-01;7.70E-01;8.84E-01;1.14E+00;8.01E-01;9.82E-01;1.15E+00;1.42E+00;1.38E+00;1.57E+00;2.04E+00;2.49E+00;1.76E+00;7.84E-01;3.54E-01
MACROD1	-2.46896	0.70522	9	CCGCCGAGGTCCGCGCACGG;GACACTTGGCGGGTGCCACG;GGTAGTCAATGTTGGAGTCG;GTGGACGCCATCGTCAACGC;GTCCTCCTCAATGCTGACGG;GCCGAGGCGGGCAGATCACG;AACAACCAGATCAACAACGC;GGCACTCGTCGGTAAGCAGG;GAGGCCCCGCACGTTGACCA	-4.8;-3.35;-3.31;-3.07;-2.05;-1.91;-1.71;-1.28;-0.75	789;18576;19475;24735;43941;46089;49245;55912;63324	1.07E+00;5.18E-01;6.29E-01;7.18E-01;5.86E-01;6.06E-01;6.98E-01;7.33E-01;7.87E-01	14118;21530;28197;31359;33501;52728;57985;58845;76653	4.84E-01;5.46E-01;5.72E-01;5.97E-01;7.04E-01;5.65E-01;5.23E-01;6.19E-01;4.00E-02
LOC730183	-1.37106	0.805829	4	GGGCTGCCATGGGAATCGGG;CGATAGCGATTCCGAGCGAG;CGGAATCGCTATCGCCGGCG;AAGCTGCAGCAAGTTAGCAG	-2.78;-1.35;-1.14;-0.22	31128;54772;58007;68873	4.64E-01;5.90E-01;3.75E-01;2.04E-01	8569;19432;22670;46291	5.07E-01;6.74E-01;1.15E+00;8.94E-01
KRR1	-2.75392	0.663436	4	TCCAACCATCAGGAACCGTA;GTAGCATGTTAATGCAACCC;TAAGCCACTAAAAGGTCCAA;AACTTTGTTCCCAAAATACA	-4.35;-3.51;-1.9;-1.25	3456;15180;46289;56254	8.08E-01;8.27E-01;4.64E-01;5.55E-01	21188;31158;62278;73986	3.77E-01;4.60E-01;3.90E-01;7.93E-02
STRN	-1.8533	0.591502	5	AAAAAAGCATTGCCTGACAG;AGAACTAGCAGGCCTTACGG;GCCGAGGCGGGCAGATCACG;GGGAGTAATTACCAAACTCA;CACAGGTATCTACAGGAGGT	-3.55;-2.3;-1.91;-1.02;-0.49	14324;39961;46089;59795;66361	3.89E-01;5.20E-01;4.62E-01;3.93E-01;3.35E-01	11081;17647;31359;37479;63106	4.14E-01;6.22E-01;6.29E-01;8.49E-01;4.45E-01
HMGN1P4	-1.46317	0.502311	1	AAAGGGAAAACAGGCCGAAG	-1.46	53083	0.164	24359	0.502
HMGN1P3	-1.46317	0.502311	1	AAAGGGAAAACAGGCCGAAG	-1.46	53083	0.164	24359	0.502
HIST2H3PS2	-1.42796	0.727603	4	CTCGCGTACCAGCCGCTGGA;GGTAGCCAGCTGCTTCCTCG;CCTTGCCGCCGGTCGACTTG;CCGCTACCGGCCCGGCACCG	-3.4;-1.68;-0.56;-0.07	17509;49693;65528;69953	3.78E-01;4.99E-01;4.29E-01;1.77E-01	7489;11914;27748;59948	5.45E-01;9.93E-01;9.28E-01;4.45E-01
C8orf48	-0.726579	1.13216	4	TTTGAAGAACTCTACTGATG;GGAAAAGCAGACTCCAAGCT;AAATTTGATTCATCGTAGAG;GAATCTACTTTAAAAACATG	-3.21;-1.13;0.4;1.02	21652;58176;72916;74605	3.79E-01;6.79E-01;7.10E-01;6.48E-02	2837;4526;19266;55764	8.83E-01;1.74E+00;1.33E+00;5.70E-01
C8orf46	-2.2619	0.534835	4	CCGGCAGGTGGTGATCGAGT;CCAAAACATCAAATCTGTGT;GCGACCGCCGCAGGTTTGGG;CATGGCTGTCGCCTCCAATG	-2.92;-2.84;-2.81;-0.48	28079;29812;30440;66409	4.25E-01;4.73E-01;8.31E-01;2.67E-01	11033;47018;47630;49363	4.44E-01;4.67E-01;4.46E-01;7.82E-01
C8orf44	-1.0265	1.03818	4	AGAAGCAGAAAAGGCAAAAG;CCTCCCATGAGGGAAAGTGT;CAAGGCAGGCAGATCACCTG;GGGAGCACTTCGAAAACCAC	-2.82;-0.75;-0.53;0.0	30126;63291;65843;70868	4.50E-01;8.74E-01;4.34E-01;1.54E-01	6574;11599;14151;47313	5.85E-01;1.01E+00;1.70E+00;8.56E-01
TP53I3	-2.50746	0.583761	4	CTAATCCATGCAGGACTGAG;CCAGGGACACTGGAAGATCG;GCAACGCTGAAATTCACCAA;GAACCGGGCGGACTTAATGC	-3.31;-3.18;-3.13;-0.41	19341;22300;23415;67088	3.75E-01;5.98E-01;1.11E+00;2.49E-01	10354;54029;55158;58082	4.59E-01;5.74E-01;3.81E-01;5.00E-01
MB	-2.09965	0.48722	4	TAAGAAGAAGGGGCATCATG;AGGCTGACATCCCAGGCCAT;CAAACTTCTCCAGAGTCTCT;CTTAAGGATGCCACCCAGGG	-3.63;-3.31;-0.81;-0.65	13020;19375;62585;64545	4.12E-01;6.75E-01;3.92E-01;3.16E-01	12897;14857;58059;64436	4.14E-01;8.41E-01;3.75E-01;3.19E-01
DUX4L7	-2.13368	0.563383	3	TCCAGGCATCGCCGCCCGGG;ACACCGGCGCGTGGGGAACG;GGCAGGCGGCCTGTGCAGCG	-2.5;-2.04;-1.86	36425;44145;46922	4.02E-01;3.78E-01;6.53E-01	30513;33296;41031	3.62E-01;5.00E-01;8.28E-01
DUX4L6	-2.13368	0.563383	3	TCCAGGCATCGCCGCCCGGG;ACACCGGCGCGTGGGGAACG;GGCAGGCGGCCTGTGCAGCG	-2.5;-2.04;-1.86	36425;44145;46922	4.02E-01;3.78E-01;6.53E-01	30513;33296;41031	3.62E-01;5.00E-01;8.28E-01
DUX4L5	-2.13368	0.563383	3	TCCAGGCATCGCCGCCCGGG;ACACCGGCGCGTGGGGAACG;GGCAGGCGGCCTGTGCAGCG	-2.5;-2.04;-1.86	36425;44145;46922	4.02E-01;3.78E-01;6.53E-01	30513;33296;41031	3.62E-01;5.00E-01;8.28E-01
DUX4L4	-2.13368	0.563383	3	TCCAGGCATCGCCGCCCGGG;ACACCGGCGCGTGGGGAACG;GGCAGGCGGCCTGTGCAGCG	-2.5;-2.04;-1.86	36425;44145;46922	4.02E-01;3.78E-01;6.53E-01	30513;33296;41031	3.62E-01;5.00E-01;8.28E-01
DUX4L3	-2.13368	0.563383	3	TCCAGGCATCGCCGCCCGGG;ACACCGGCGCGTGGGGAACG;GGCAGGCGGCCTGTGCAGCG	-2.5;-2.04;-1.86	36425;44145;46922	4.02E-01;3.78E-01;6.53E-01	30513;33296;41031	3.62E-01;5.00E-01;8.28E-01
DUX4L2	-2.13368	0.563383	3	TCCAGGCATCGCCGCCCGGG;ACACCGGCGCGTGGGGAACG;GGCAGGCGGCCTGTGCAGCG	-2.5;-2.04;-1.86	36425;44145;46922	4.02E-01;3.78E-01;6.53E-01	30513;33296;41031	3.62E-01;5.00E-01;8.28E-01
DUX4L1	-2.13368	0.563383	3	TCCAGGCATCGCCGCCCGGG;ACACCGGCGCGTGGGGAACG;GGCAGGCGGCCTGTGCAGCG	-2.5;-2.04;-1.86	36425;44145;46922	4.02E-01;3.78E-01;6.53E-01	30513;33296;41031	3.62E-01;5.00E-01;8.28E-01
SLC18A3	-2.38193	0.510774	4	TACATCGCCCACATGCGCGG;GCCCAGCACATGAGGCACGA;CAGCGCGTCAAAGAGCGACA;GATCGCCGATAAGTACCCGG	-3.04;-2.86;-2.65;-0.98	25417;29328;33647;60363	4.00E-01;4.79E-01;7.32E-01;4.33E-01	17080;43795;48096;52043	3.79E-01;4.41E-01;4.40E-01;6.90E-01
SLC18A2	-2.42485	0.511906	4	GGGACAGTCGGAAGGAACAG;CATAGAGCACACTCCCGAAG;ACAGATAACTTGGGATGATG;TCCTTCAGCAGCGTGGTTAG	-4.14;-2.84;-1.51;-1.21	5512;29745;52385;56927	6.42E-01;4.74E-01;3.97E-01;5.35E-01	20515;25057;47708;71930	3.76E-01;5.41E-01;4.45E-01;1.28E-01
SLC18A1	-2.67902	0.623213	4	GGCCACAAAGAGTAGAGTAT;TTCATCCATGCTATTCCACT;GAGGAAGAGATTACCCGGGT;TCTTTGAGAAGCATAAAGAG	-3.89;-3.29;-3.09;-0.45	8793;19889;24246;66729	5.00E-01;6.60E-01;1.07E+00;2.59E-01	10713;53195;57572;68654	4.51E-01;5.57E-01;3.75E-01;2.09E-01
DUX4L9	-2.13368	0.563383	3	TCCAGGCATCGCCGCCCGGG;ACACCGGCGCGTGGGGAACG;GGCAGGCGGCCTGTGCAGCG	-2.5;-2.04;-1.86	36425;44145;46922	4.02E-01;3.78E-01;6.53E-01	30513;33296;41031	3.62E-01;5.00E-01;8.28E-01
DUX4L8	-2.18102	0.436356	2	TCCAGGCATCGCCGCCCGGG;GGCAGGCGGCCTGTGCAGCG	-2.5;-1.86	36425;46922	3.03E-01;4.35E-01	30513;41031	3.21E-01;5.52E-01
RALBP1	-1.68887	0.637477	5	ACAATCCAGGAAACTTAGTA;AAGTGATGAAACCTCTGCGA;AAAAGCAGCCTATGACCGGG;CAAGGCAGGCAGATCACCTG;CATGGACCATGTCATTGCAA	-4.67;-2.43;-1.55;-0.53;0.74	1293;37702;51728;65843;73986	1.11E+00;4.94E-01;4.83E-01;4.07E-01;9.91E-02	3456;11599;25714;39740;76146	7.31E-01;8.61E-01;7.87E-01;7.73E-01;3.66E-02
ZNF831	-2.83016	0.671695	4	TCCATGAGGACATATCCGCA;GTCCGCATTTGCCGACAGAG;AGCACAGCGCCGAGTCCGAG;GGCACACTTAGTTCAGGACA	-3.48;-3.1;-2.68;-2.06	15834;24019;33047;43771	3.85E-01;5.61E-01;7.49E-01;9.91E-01	33671;44384;53437;61614	5.03E-01;4.45E-01;3.90E-01;3.97E-01
ZNF830	-0.563808	1.20733	4	CTTAACCGGAGTGTTACACA;TAAATCAGGAAGAATTGCGG;CCAAGATGTCAAGAGAGCGA;GGAAAGGAGAGAAAACACCG	-2.01;-1.74;0.03;1.47	44608;48695;71031;75273	7.55E-01;4.86E-01;5.93E-01;4.93E-02	2169;6411;28747;32845	9.88E-01;1.46E+00;8.91E-01;1.49E+00
ZNF835	-3.17664	0.903078	4	CTGCGTCAGGTGCGACACCT;GATGCGCTGGTGCTCTATCA;CAAGAAGCCGTGGAAATGCG;CCGACGACAGCAGTTCCCGG	-3.97;-3.87;-2.44;-2.43	7597;8995;37636;37812	5.41E-01;1.20E+00;6.27E-01;1.25E+00	39650;39814;68441;69834	6.23E-01;4.27E-01;4.94E-01;1.80E-01
ZNF837	-1.91159	0.569536	4	CTGAGCTGGTTATCCCCGAG;TGTGTGACCCCTGTCCGGAG;GACAATAGGGCGAGGTCGCG;GGAGCCGCCCCACTCAAAAG	-2.85;-2.75;-1.73;-0.32	29662;31675;48927;67927	4.44E-01;4.55E-01;4.30E-01;2.28E-01	9515;28515;45744;47790	4.79E-01;4.88E-01;4.72E-01;8.39E-01
ZNF836	-0.413719	1.2209	5	CAGCATCAGAGAATTCACAC;CCTTCCTAAATGTATGACCA;TGTGGGAAAACCTTCAAACA;ATCAGATAGTCCATACAAGG;GTCAGACTTCACATCTTGTG	-2.92;-1.23;-1.02;-0.66;3.75	28089;56687;59830;64428;76888	5.24E-01;9.87E-01;6.23E-01;3.95E-01;1.56E-02	554;13014;17612;20755;49335	1.46E+00;7.89E-01;1.15E+00;1.72E+00;9.79E-01
ZNF839	-2.71057	0.849238	6	TTGCGATCAGAGAGATACCA;TTATAAGTTCATAAAAACAG;CATCAGAAGAAACTCATACA;CAGCGAGAAGAGGGAACGTG;GGAATCTCACTCTGTCACCC;CAAGGCAGGCAGATCACCTG	-4.69;-4.46;-2.57;-2.48;-1.53;-0.53	1228;2522;35105;36842;52067;65843	1.06E+00;1.86E+00;5.17E-01;6.75E-01;5.68E-01;4.23E-01	11599;25378;40600;42337;74917;76214	3.99E-01;4.83E-01;5.08E-01;5.60E-01;7.81E-01;4.16E-02
LRIF1	-1.45317	1.0409	9	TAAAAGTAAATCTTCCCAGA;GGAGATACATAAATAACGGT;TATTGTCTGAGTGGTAACGG;TGTACTCACAAATGACTGGA;ATGACTGAAGATTGAACTAG;CTGCTGATCCACAACAACTT;TTGAGTACCATCGATCCTAG;TCCTGCCTCAGCCTCCCGAG;AGCCACATACTCATTCAGCT	-3.67;-2.98;-1.7;-1.61;-1.32;-0.85;-0.58;-0.4;0.03	12232;26783;49401;50816;55318;62050;65295;67218;71046	4.45E-01;6.56E-01;1.31E+00;9.50E-01;8.07E-01;7.58E-01;5.71E-01;4.17E-01;3.37E-01	6396;10224;12147;15392;22124;26626;28041;50675;65224	4.28E-01;6.33E-01;9.34E-01;1.19E+00;1.20E+00;1.41E+00;1.92E+00;9.81E-01;6.71E-01
OXCT2P1	-2.74802	0.52425	2	GCTCATGAGCCAGCCCCGAG;CGTAGGAACAGACGATGCGA	-2.85;-2.65	29573;33706	3.26E-01;7.23E-01	43707;47851	3.08E-01;4.18E-01
FAM91A1	-2.568	0.786748	4	ATTTATCATGTCACTGGACA;AAATTGCCATAGAGGCGTGG;TTTGTAATGAATCGAGTGCA;TTACGATATAGAAATAACTT	-4.86;-2.07;-1.69;-1.65	581;43562;49557;50241	1.53E+00;4.40E-01;4.23E-01;7.52E-01	27201;27885;33880;76861	4.16E-01;4.97E-01;7.25E-01;1.31E-02
SUGCT	-1.36168	1.03536	8	GGTGATGATACACGAACTTG;GCCGAGGCGGGCAGATCACG;TAATATCAAGGATCCAAAAG;CAGGAGACTCACCTGAACCT;GGAGGGTACCTGACTGCGGG;CAAGGCAGGCAGATCACCTG;ATGGAACAATAGATGATGTG;GAGAATCGCTTGAATCCGGG	-3.97;-1.91;-1.87;-1.83;-1.46;-0.53;0.25;0.44	7587;46089;46698;47352;53110;65843;72313;73043	4.19E-01;1.36E+00;9.17E-01;6.52E-01;5.79E-01;6.25E-01;4.84E-01;2.03E-01	4399;5129;11599;24332;30088;30744;31359;69852	5.20E-01;1.09E+00;1.08E+00;8.21E-01;9.46E-01;1.40E+00;2.07E+00;3.58E-01
TSPY8	-2.03019	0.912815	21	CTGTACAGCCTCCATCCTGA;GCGCCTCTGCGGTCTAGGTG;AGGCTGCGGCAGGGTTTCTG;GACCCCAGAGTCTGCACTGG;CGGCAGGGTTTCTGTGGCGT;CTCCTCCAGTGCAGACTCTG;GTTGGATGACATAATGGCGG;GGTGTGTGCGAGTGCCAAGG;CGGCGCCTCTGCGGTCTAGG;GGCGGAGGAGGAGGGCCTCG;GGCGCCTCTGCGGTCTAGGT;TCTGGATGACGGCGCCTCTG;CAGGATGGAGGCTGTACAGG;AGCGGGAAAAGATGGAGCGG;CTTGGTGTGTGCGAGTGCCA;GCTGTTGGATGACATAATGG;AAGCCCCACCTAGACCGCAG;GTGTGTGCGAGTGCCAAGGA;AGGAGGAGGGCCTCGTGGAG;…	-3.87;-3.86;-3.74;-2.95;-2.86;-2.63;-2.57;-2.4;-2.38;-2.28;-2.16;-1.98;-1.9;-1.86;-1.8;-1.39;-0.96;-0.73;-0.58;-0.28;0.53	9002;9229;11088;27403;29438;34089;35180;38234;38622;40223;42077;45030;46359;46861;47884;54230;60565;63599;65313;68369;73366	6.86E-01;5.72E-01;6.16E-01;1.25E+00;1.12E+00;1.18E+00;1.02E+00;9.87E-01;8.50E-01;7.98E-01;7.71E-01;7.62E-01;7.60E-01;8.13E-01;9.07E-01;7.84E-01;6.84E-01;6.59E-01;6.94E-01;6.91E-01;4.93E-01	4076;9073;12129;13843;16877;23216;29557;30581;31084;32419;35347;37207;38835;39208;42244;43350;47982;50039;66338;68209;68445	4.26E-01;5.68E-01;6.23E-01;6.68E-01;7.08E-01;7.26E-01;7.86E-01;7.56E-01;7.74E-01;8.25E-01;8.47E-01;9.11E-01;1.01E+00;1.22E+00;1.27E+00;1.50E+00;1.44E+00;1.64E+00;6.42E-01;7.04E-01;1.13E+00
CPEB2	-1.57882	0.755057	5	AGGAGGCCAAGCCCGCATTG;AAGCCGGTGACAGGCAACGG;TGAGGTATATTCATGGCGGG;CAAGGCAGGCAGATCACCTG;GTGGTCGGGGAGTTTCTCCG	-3.26;-1.84;-1.77;-0.53;-0.49	20510;47221;48278;65843;66333	4.13E-01;6.56E-01;4.64E-01;4.07E-01;3.36E-01	11109;11599;29164;30221;56932	4.13E-01;8.61E-01;6.83E-01;1.15E+00;6.68E-01
TSPY3	-2.03019	0.912815	21	CTGTACAGCCTCCATCCTGA;GCGCCTCTGCGGTCTAGGTG;AGGCTGCGGCAGGGTTTCTG;GACCCCAGAGTCTGCACTGG;CGGCAGGGTTTCTGTGGCGT;CTCCTCCAGTGCAGACTCTG;GTTGGATGACATAATGGCGG;GGTGTGTGCGAGTGCCAAGG;CGGCGCCTCTGCGGTCTAGG;GGCGGAGGAGGAGGGCCTCG;GGCGCCTCTGCGGTCTAGGT;TCTGGATGACGGCGCCTCTG;CAGGATGGAGGCTGTACAGG;AGCGGGAAAAGATGGAGCGG;CTTGGTGTGTGCGAGTGCCA;GCTGTTGGATGACATAATGG;AAGCCCCACCTAGACCGCAG;GTGTGTGCGAGTGCCAAGGA;AGGAGGAGGGCCTCGTGGAG;…	-3.87;-3.86;-3.74;-2.95;-2.86;-2.63;-2.57;-2.4;-2.38;-2.28;-2.16;-1.98;-1.9;-1.86;-1.8;-1.39;-0.96;-0.73;-0.58;-0.28;0.53	9002;9229;11088;27403;29438;34089;35180;38234;38622;40223;42077;45030;46359;46861;47884;54230;60565;63599;65313;68369;73366	6.86E-01;5.72E-01;6.16E-01;1.25E+00;1.12E+00;1.18E+00;1.02E+00;9.87E-01;8.50E-01;7.98E-01;7.71E-01;7.62E-01;7.60E-01;8.13E-01;9.07E-01;7.84E-01;6.84E-01;6.59E-01;6.94E-01;6.91E-01;4.93E-01	4076;9073;12129;13843;16877;23216;29557;30581;31084;32419;35347;37207;38835;39208;42244;43350;47982;50039;66338;68209;68445	4.26E-01;5.68E-01;6.23E-01;6.68E-01;7.08E-01;7.26E-01;7.86E-01;7.56E-01;7.74E-01;8.25E-01;8.47E-01;9.11E-01;1.01E+00;1.22E+00;1.27E+00;1.50E+00;1.44E+00;1.64E+00;6.42E-01;7.04E-01;1.13E+00
TSPY2	-1.93214	0.968642	19	GCGCCTCTGCGGTCTAGGTG;CTGCACAGCCTCCATCCTGA;AGGCTGCGGCAGGGTTCCTG;GACCCCAGAGTCTGCACTGG;CTCCTCCAGTGCAGACTCTG;GTTGGATGACATAATGGCGG;GGTGTGTGCGAGTGCCAAGG;CGGCGCCTCTGCGGTCTAGG;GGCGGAGGAGGAGGGCCTCG;GGCGCCTCTGCGGTCTAGGT;TCTGGATGACGGCGCCTCTG;AGCGGGAAAAGATGGAGCGG;CTTGGTGTGTGCGAGTGCCA;GCTGTTGGATGACATAATGG;AAGCCCCACCTAGACCGCAG;GTGTGTGCGAGTGCCAAGGA;AGGAGGAGGGCCTCGTGGAG;GGAGGGCCTCGTGGAGCGGC;GCTCCTCCAGTGCAGACTCT	-3.86;-3.34;-3.11;-2.95;-2.63;-2.57;-2.4;-2.38;-2.28;-2.16;-1.98;-1.86;-1.8;-1.39;-0.96;-0.73;-0.58;-0.28;0.53	9229;18855;23863;27403;34089;35180;38234;38622;40223;42077;45030;46861;47884;54230;60565;63599;65313;68369;73366	6.37E-01;1.05E+00;1.11E+00;1.06E+00;1.24E+00;1.04E+00;9.91E-01;8.38E-01;7.77E-01;7.47E-01;7.38E-01;7.40E-01;7.90E-01;7.17E-01;6.60E-01;6.25E-01;6.35E-01;6.27E-01;4.46E-01	4076;9073;12129;13843;16877;23216;29557;30581;32419;35347;37207;38835;39208;42244;43350;50039;53559;58603;68209	4.23E-01;5.49E-01;6.13E-01;6.85E-01;7.37E-01;7.18E-01;7.31E-01;7.50E-01;7.93E-01;8.23E-01;8.98E-01;1.01E+00;1.25E+00;1.33E+00;1.62E+00;1.40E+00;1.51E+00;1.51E+00;1.05E+00
TSPY1	-1.98544	0.91864	18	GCGCCTCTGCGGTCTAGGTG;AGGCTGCGGCAGGGTTTCTG;CTGCACAGCCTCCATCCTGA;CGGCAGGGTTTCTGTGGCGT;GTTGGATGACATAATGGCGG;GGTGTGTGCGAGTGCCAAGG;CGGCGCCTCTGCGGTCTAGG;GGCGGAGGAGGAGGGCCTCG;GGCGCCTCTGCGGTCTAGGT;TCTGGATGACGGCGCCTCTG;AGCGGGAAAAGATGGAGCGG;CTTGGTGTGTGCGAGTGCCA;GCTGTTGGATGACATAATGG;AAGCCCCACCTAGACCGCAG;GTGTGTGCGAGTGCCAAGGA;GACCCCAGAGTCTGCACCGG;AGGAGGAGGGCCTCGTGGAG;GGAGGGCCTCGTGGAGCGGC	-3.86;-3.74;-3.34;-2.86;-2.57;-2.4;-2.38;-2.28;-2.16;-1.98;-1.86;-1.8;-1.39;-0.96;-0.73;-0.58;-0.58;-0.28	9229;11088;18855;29438;35180;38234;38622;40223;42077;45030;46861;47884;54230;60565;63599;65291;65313;68369	6.05E-01;5.77E-01;7.47E-01;1.10E+00;1.20E+00;1.12E+00;9.11E-01;8.17E-01;7.61E-01;7.40E-01;7.22E-01;7.47E-01;6.95E-01;6.56E-01;6.14E-01;6.10E-01;8.07E-01;9.74E-01	9073;12129;12151;13843;16877;23216;29557;30581;32419;35347;37207;38835;39208;42244;47982;58603;66338;68209	5.96E-01;6.09E-01;6.13E-01;7.03E-01;7.63E-01;7.28E-01;7.22E-01;7.69E-01;8.37E-01;8.83E-01;9.90E-01;1.14E+00;1.44E+00;1.57E+00;1.47E+00;9.80E-01;7.31E-01;9.92E-01
LOC105373606	-1.91411	0.392609	1	GCCGAGGCGGGCAGATCACG	-1.91	46089	0.225	31359	0.393
SLC17A8	-2.86755	0.808102	5	AAAAATCGATGGGACAACTG;TACACTTAGACTAACCACGT;TAGCAATGATGTAACGCTTG;AATTCTGCAAGGTTTAGTGG;CAAGGCAGGCAGATCACCTG	-4.0;-3.41;-3.24;-3.15;-0.53	7213;17126;20921;22876;65843	5.02E-01;6.36E-01;9.79E-01;1.57E+00;3.52E-01	11599;54581;56512;60300;70230	4.07E-01;8.94E-01;5.47E-01;3.91E-01;2.12E-01
SLC17A9	-2.23952	0.480048	4	CACGTACCACACCCAAAGCA;GGAGACCTTCCCCGACGCCA;GCAGTTACCGATCCCCGAGG;GGCCAGGACTTACCCAAACT	-3.17;-3.17;-2.44;-0.19	22516;22532;37620;69118	3.82E-01;5.93E-01;6.27E-01;1.98E-01	8324;39822;54908;54928	5.15E-01;4.27E-01;3.82E-01;5.97E-01
RAB33B	-1.97512	0.534564	4	GTGATCGGCGACTCCAATGT;TGCTAGCCAATGATATACCA;GGTGGATTTCCGAGAACGAG;AGAACGATTCAGAAAGAGCA	-3.21;-3.07;-2.14;0.52	21590;24675;42554;73304	3.78E-01;5.49E-01;5.24E-01;9.54E-02	4138;34872;52748;55863	7.42E-01;4.35E-01;3.95E-01;5.67E-01
SLC17A4	-3.29399	1.14806	4	AGTACCGAGCTGATGTACGT;AGGACTCCAGTCATATGCAG;CCAGTTAATACCATAACCTG;ACAGGATCATCATAAATGAG	-5.02;-3.89;-2.88;-1.39	264;8741;28940;54253	1.87E+00;1.22E+00;8.84E-01;6.18E-01	23189;48502;68701;77180	3.85E-01;4.83E-01;5.01E-01;5.86E-03
SLC17A5	-1.68432	0.654942	5	GCAACTACGATAGCCCAAAG;GTAGGGTAAGAAGTACCAAT;ATATGTTGCCAGCAAAATAG;CAAGGCAGGCAGATCACCTG;AGTGCTCTGAGTACAATGAG	-4.05;-3.71;-1.21;-0.53;1.09	6530;11626;56896;65843;74733	5.28E-01;8.59E-01;5.54E-01;4.07E-01;7.73E-02	2709;11599;20546;65828;70909	8.19E-01;8.61E-01;9.97E-01;4.07E-01;1.91E-01
SLC17A6	-1.93722	0.495	4	AACAACAGCACCATCCACCG;TGATGGCGATAATGTAGCGG;CGGGAGGCTACATCGCGTCT;CTATTACAGATGAAGAACGT	-3.79;-2.67;-0.97;-0.33	10348;33294;60479;67900	4.59E-01;4.43E-01;3.80E-01;2.28E-01	9542;16963;44148;67094	4.79E-01;7.56E-01;4.97E-01;2.49E-01
SLC17A7	-0.865285	1.17097	4	GCCGAACACTTCTTCGAAGT;TGAGTACTGCACAAGGACCC;GAAACTCATGAACCCCCTCA;AACAGCACGACCCACCGCGG	-1.56;-1.12;-0.8;0.02	51567;58325;62700;70971	1.00E+00;6.83E-01;3.93E-01;1.52E-01	6471;14742;19117;25875	5.90E-01;8.46E-01;1.34E+00;1.90E+00
SLC17A1	-2.41555	0.790579	16	AGTACCGAGCTGATGTACGT;AGGACTCCAGTCATATGCAG;TTCCCTTACGAAGCAGACGA;GAAAAACGTAAAACTACCAG;AAACTATGCAGAGCGGATAG;CATTGCGGATCGCTAGCTGC;CATCTACAAAGTGCTAAAGC;TTTGACATATATTTCAAACT;CCAGTTAATACCATAACCTG;ATTGTCTACTTGAACTGACC;CTTTGAGCGTATAGCGAGCG;ACAGGATCATCATAAATGAG;TGCGTGCCTGAACCTCACAA;AGAAGAGCGAGACTTAGACT;CTCAAAGATATCAGTGACGA;AAAGCGCAAGAGGACCCGTA	-5.02;-3.89;-3.83;-3.75;-3.27;-3.09;-2.97;-2.93;-2.88;-1.94;-1.8;-1.39;-1.26;-1.17;0.18;0.37	264;8741;9605;10968;20325;24198;26888;27794;28940;45689;47764;54253;56115;57559;71928;72763	1.29E+00;5.44E-01;7.19E-01;9.31E-01;7.19E-01;7.55E-01;8.24E-01;9.95E-01;1.21E+00;7.11E-01;7.51E-01;6.89E-01;7.51E-01;9.06E-01;4.25E-01;4.33E-01	4679;5514;19883;21327;23189;29672;31753;48502;49663;50540;53244;57119;66483;67846;68701;77180	4.21E-01;6.65E-01;6.99E-01;6.59E-01;6.78E-01;6.94E-01;7.14E-01;9.36E-01;7.95E-01;7.05E-01;6.75E-01;6.50E-01;6.61E-01;5.39E-01;5.23E-01;2.35E-02
SLC17A2	-2.53525	0.551839	4	ATACTGACTCTGATCCCAAG;ATGTGACCATCGCCTTTATG;AGCAGAGTACTGATATACGT;TTATGCACGGGTGATGCATG	-3.31;-2.89;-2.87;-1.07	19355;28629;29190;59055	3.75E-01;4.87E-01;8.75E-01;4.71E-01	18387;48252;48812;58104	3.76E-01;4.80E-01;4.31E-01;4.99E-01
SLC17A3	-2.56441	0.549511	4	ATTGTAACTCGAATAGTCCA;TTATCCATGGATAGGAAACG;TCATTAGTGAAACCCTTGGG;CTATGGTGGCATACTGACAA	-3.52;-2.96;-2.91;-0.86	14983;27179;28202;61900	3.91E-01;5.07E-01;9.11E-01;3.89E-01	15542;49257;50269;62470	3.87E-01;4.93E-01;4.16E-01;3.73E-01
C16orf58	-2.95616	0.78362	4	GCCTTCACGGTCAAACCTGA;AGCCATAATCTCAAGGAACA;CATGGCTGACGTGTCAGCCA;TGAGGAAGAAGAAACATCCA	-3.36;-3.06;-2.94;-2.46	18308;24992;27502;37091	3.76E-01;5.43E-01;9.37E-01;1.28E+00	40366;49922;52450;59134	6.41E-01;5.02E-01;3.97E-01;4.69E-01
C16orf59	-2.96683	0.807988	4	AAGCAGCTTCCCAGAACTCG;TCAGACACGAGACCCACCAA;AGGGCCAGAAACTAATGGAG;AAGGCTGTACGAGTTCGAAG	-3.58;-3.51;-3.33;-1.44	13919;15147;18911;53392	4.01E-01;8.28E-01;1.36E+00;6.46E-01	24050;58528;62296;63534	3.90E-01;6.89E-01;3.90E-01;3.44E-01
C16orf52	-2.40489	0.575925	5	ATTTCATTGACTGTCACATG;AACCCGGACTGGATCAACAC;TTGTAGCTTCTCTTCGCCAG;GCCGAGGCGGGCAGATCACG;GGCGATGGCGAAGATATCGG	-3.3;-2.92;-2.26;-1.91;-1.62	19635;28017;40494;46089;50609	4.05E-01;4.68E-01;4.88E-01;5.95E-01;9.24E-01	26833;31359;36948;49442;57808	5.00E-01;4.62E-01;5.27E-01;5.22E-01;6.35E-01
WASIR1	-1.91411	0.392609	1	GCCGAGGCGGGCAGATCACG	-1.91	46089	0.225	31359	0.393
C16orf54	-3.6341	1.41542	4	ACACCAGGGTGGGTGCACGG;TGAGGACTGGTATGGCTCTG;CAGGCGTTCAGCCAACACAG;GGGCCCCCAGACCGTACTGG	-4.57;-4.22;-3.68;-2.07	1836;4636;12084;43694	1.05E+00;1.72E+00;1.89E+00;9.94E-01	33748;65362;72813;75606	5.04E-01;9.83E-01;7.02E-01;4.17E-02
ITCH	-2.49567	0.705567	7	TCCCGAACATAGGCTATCTG;AGAAAGGAGTCTTTGGACAG;GAACGGCGGGTTGACAACAT;AATACAAACCTGGTCTACGT;GGAATCTCACTCTGTCACCC;ATTGTGTAATTCGTGTGTTG;CAAGGCAGGCAGATCACCTG	-4.47;-4.06;-3.69;-2.35;-1.53;-0.83;-0.53	2508;6425;11888;39026;52067;62230;65843	7.30E-01;1.03E+00;1.19E+00;5.60E-01;5.09E-01;4.32E-01;4.93E-01	11599;15212;25378;38432;65561;71013;74933	4.02E-01;5.66E-01;5.99E-01;5.66E-01;6.68E-01;4.62E-01;1.00E-01
CHMP4A	-1.33679	0.679372	4	CAGCAAGCTCCATGGTACGA;GGGTGATGTCTCATCACACA;TGACGGGACATTATCCACCC;AGAGGCGAGCTCGCGATGAG	-3.3;-2.43;-1.87;2.25	19583;37798;46816;76043	3.75E-01;4.26E-01;4.57E-01;3.16E-02	1399;30626;39641;57873	1.16E+00;4.65E-01;5.82E-01;5.06E-01
CHMP4B	-3.12648	1.08433	5	TATCAACCATCGAGTTCCAG;GGGCGGCCCGACCCCCCAGG;GAATGCCAACACCAACACCG;CACGGCACCAAAAACAAGCG;CAAGGCAGGCAGATCACCTG	-4.57;-3.63;-3.46;-3.43;-0.53	1820;12920;16145;16831;65843	9.71E-01;7.93E-01;1.25E+00;2.06E+00;3.52E-01	11599;60605;61307;64534;75622	4.07E-01;1.20E+00;6.67E-01;3.96E-01;5.16E-02
CHMP4C	-2.27626	0.435715	4	ACACCAACACTGAGGTGTTG;GGTCCGACTTCGGGAGACTG;GCAAGAGATCACAGAGCAAC;AATCCAGAGAGAAATCGCCC	-3.36;-3.08;-1.93;-0.73	18322;24547;45776;63494	3.76E-01;5.51E-01;4.71E-01;3.45E-01	13948;31657;52917;59122	4.01E-01;4.55E-01;3.93E-01;4.69E-01
COBLL1	-2.7444	0.599811	4	TTAAGTGATACTGTGCACAA;TATTTCCAACACCCTGCCGT;GTAGTATATGATACAAGCAA;TATGCGATGGATGTCAACAG	-4.02;-3.08;-2.38;-1.49	6900;24451;38594;52600	5.70E-01;5.53E-01;6.05E-01;6.72E-01	24842;38848;53009;70536	3.96E-01;4.26E-01;3.93E-01;1.62E-01
TMEM255B	-1.79819	0.71101	4	GACGCCGATGAACTCATAGT;GTACGATGTCTACCAGACAG;GTAAAACTGGCATCTTCCCG;ACGGAGAATGTGACCGTTGG	-2.31;-2.28;-1.38;-1.23	39691;40200;54436;56737	6.24E-01;4.27E-01;3.84E-01;5.40E-01	20705;23006;37242;37732	3.76E-01;5.82E-01;6.37E-01;1.25E+00
TMEM255A	-1.58898	0.904796	9	TTTGGGAGGTATCAGCCTGT;ACTGTAGGAGGTTATTACCC;AAGCATCTCAGGTACAGCGC;AAGACATCACCAATTTGATA;TGGCACCGGTTAGCGTAGAG;AAGGTTCCTCATAACCCTCG;AATACTAATGATCCAGGCGT;GTCCGTGTTAATTCTCACAG;GGCGAGTTATTGCTAGCACT	-4.81;-2.75;-1.92;-1.67;-1.64;-1.25;-0.85;-0.01;0.61	731;31573;46002;49806;50292;56355;62074;70388;73615	1.10E+00;8.15E-01;1.10E+00;9.04E-01;6.58E-01;5.99E-01;5.21E-01;4.18E-01;1.98E-01	3827;7054;15368;21087;27150;27636;31440;45851;76711	5.28E-01;8.15E-01;7.59E-01;8.50E-01;9.26E-01;1.34E+00;1.64E+00;1.26E+00;3.70E-02
ST5	-2.49537	0.535417	5	AGCATGGGAAGGTCGCCGAG;CTGTGCCTCTTGGGTAATCG;GAAGGAGGTAGACCATTACT;CGCCCCCAGCTATCGCACGC;TCCTGCCTCAGCCTCCCGAG	-4.04;-3.07;-2.66;-2.3;-0.4	6753;24637;33374;39803;67218	5.19E-01;4.94E-01;5.86E-01;7.71E-01;3.07E-01	10224;37641;44069;52780;70688	4.26E-01;4.94E-01;4.66E-01;4.64E-01;1.98E-01
ST7	-1.72997	0.7078	5	ATATGCTTGTAGTTCCAGAA;GTTGTAGCTGCTGAGAGCGT;CAATTCTAATTCCAGTAACG;CAAGGCAGGCAGATCACCTG;AATAAGCCCTGATATTAGTG	-4.69;-2.1;-0.9;-0.53;-0.42	1192;43212;61347;65843;67003	1.14E+00;5.70E-01;6.68E-01;4.07E-01;3.14E-01	10439;11599;16095;34230;76248	4.23E-01;8.61E-01;1.25E+00;9.73E-01;3.37E-02
ZNF304	-1.13848	0.975846	4	TCCAGTCTCAGGCAACACCA;GTGGGTCACACATCTCACAT;TGGAGAGAATTGCTTCAGAG;CATGAGATATTTCTCCACTG	-1.84;-1.5;-1.11;-0.11	47242;52493;58492;69734	8.40E-01;5.43E-01;3.75E-01;1.82E-01	7708;18950;24949;30200	5.37E-01;6.88E-01;1.04E+00;1.64E+00
STH	-3.53278	1.18271	4	TGAATCATCCACTCACACAG;GCCGGCCCTCATTGAATGCG;ACAGAACCCTCAGCTTAGCA;GCCAACCTCAGATGAACTCA	-4.57;-3.87;-3.15;-2.54	1825;9026;22994;35712	1.06E+00;1.20E+00;1.13E+00;1.34E+00	41730;54448;68409;75617	6.75E-01;5.83E-01;4.93E-01;4.14E-02
ZNF302	-2.32711	0.534623	4	ATATGTGATCATGTTATTGG;TTCACCCCAACCAGTAACAA;GTCGTGTAAGGGATGAACCA;AAAAGTGAGAGAATAAATGG	-3.93;-1.97;-1.82;-1.58	8102;45213;47479;51232	5.22E-01;4.51E-01;4.48E-01;7.18E-01	26210;29963;32229;69333	4.07E-01;4.72E-01;7.74E-01;1.92E-01
ZNF300	-3.08402	0.93676	5	AATCTTGAGAAGATTCACAA;GGCATAAATATAATCCACTG;CAGCATCAGAGAATTCACAC;TGCTCTTATAACAACTCGGT;AGCTGTGTATGTGTTACATG	-4.24;-4.23;-2.92;-2.69;-1.34	4454;4508;28089;32790;54932	6.44E-01;1.55E+00;7.13E-01;1.03E+00;7.46E-01	22510;44652;49335;72933;72988	4.34E-01;5.98E-01;4.68E-01;6.40E-01;1.29E-01
STS	-1.76113	0.672368	5	GAGAGACTGCAAGCCCGGAG;GGAGGTTACCTGATCGGACA;GGAATCTCACTCTGTCACCC;TCTCACCCAGAGGCTAACGG;AAGTCAACACGGAGTCTACG	-4.42;-1.71;-1.53;-0.6;-0.55	2823;49248;52067;65159;65668	8.04E-01;7.10E-01;4.86E-01;4.01E-01;3.58E-01	11774;12282;25378;28194;74621	4.06E-01;8.24E-01;7.98E-01;1.25E+00;8.06E-02
HOXB13	-3.02088	0.828413	4	CGAGCCTGGCAGATCCAAGG;GATAGAAGGCAAACTCAGTG;GGCAACAGGGAGTCATGTCG;ACGTCCAGGTAACTGGCCAT	-4.25;-3.91;-2.86;-1.06	4348;8383;29325;59173	7.24E-01;1.25E+00;8.70E-01;4.67E-01	18269;48117;69059;73097	3.76E-01;4.79E-01;5.13E-01;1.00E-01
PPP3CA	-2.14899	0.486877	4	CAGGAACTGTTGGTTCATCA;GCCTTTAAGATATCCACACG;GACCTATGTGTGATATCCTG;TTAGGGGACTATGTTGACAG	-4.36;-3.24;-1.25;0.25	3340;20975;56400;72303	8.21E-01;6.31E-01;3.77E-01;1.19E-01	5139;21042;56484;74102	6.65E-01;6.29E-01;3.77E-01;7.66E-02
PPP3CB	-2.13122	0.464778	5	TGCGCTTAGAATTATCAATG;AAAAGGTATCGTGTATTAGC;GACCATAACAAGTCACACAT;GATGTCAAGCGATGTGTTGG;CAAGGCAGGCAGATCACCTG	-4.09;-3.02;-1.64;-1.37;-0.53	6114;25886;50284;54456;65843	5.47E-01;4.82E-01;4.73E-01;4.40E-01;3.52E-01	11599;22986;27158;51556;71326	4.07E-01;5.14E-01;7.40E-01;4.84E-01;1.79E-01
PPP3CC	-1.78483	0.899582	7	CTGCAGGCACAAGTGCGCAT;CACACAGGTCCAAAGGCGGG;GGAATCTCACTCTGTCACCC;ATACCCACAACACTGTCCGA;TCAGCTGCTTTGTCTCAGCA;ATAGACATCTAGGTAATTGG;GAGAAACTGCTGGTTTAAGA	-3.9;-1.77;-1.53;-1.49;-1.43;-1.22;-1.16	8608;48329;52067;52652;53664;56831;57643	4.16E-01;1.21E+00;9.11E-01;6.10E-01;5.00E-01;5.36E-01;8.98E-01	19799;20611;23778;24790;25378;29113;68845	5.17E-01;4.99E-01;6.31E-01;9.37E-01;1.45E+00;1.91E+00;3.58E-01
LIF	-3.01172	0.814305	4	ACTTACATAGAGAATAAAGA;GCGGGAAGTCCGTCACGTTG;TGCCAAGGTACACGACTATG;TCTGCACTGGAAACATGGGG	-3.41;-3.27;-3.15;-2.22	17197;20279;23001;41196	3.79E-01;6.49E-01;1.13E+00;1.10E+00	36256;54441;57139;60258	5.50E-01;5.82E-01;3.75E-01;4.36E-01
RPL12	-1.65	0.861099	4	TCTTCTGCAGTTAAACACAG;GACCCCAACGAGATCAAAGT;GATAACGTACCAGACCCAGG;ACTGACCATTCAGAACAGAC	-1.84;-1.7;-1.65;-1.41	47294;49305;50177;53957	8.41E-01;4.93E-01;4.17E-01;6.28E-01	23474;27260;28131;30153	3.87E-01;5.06E-01;9.13E-01;1.64E+00
IQCJ-SCHIP1	-1.78585	0.889082	14	AGGATGAATCTTCCCAACAG;CCAATCCATAGGTGGCACCG;TGATAGAGACACTACTGAAG;TACAGCTGGTATAAATTCCT;GAGGACGAGCGCGACCAGCG;CATGGCGAGAGTACCTGCAG;GCCGAGGCGGGCAGATCACG;CAGTAAGACTGAAACCAGCT;AGAGCTGCTCAGCTTCTCTG;TCCAAGGGCTGTAGATTGAG;GCTGCTTACAAGATCAGCGA;CAAGGCAGGCAGATCACCTG;TACGGAACCAGGGCCAGGCG;AGATTTGCACTCGGAGCAAG	-4.88;-3.44;-3.08;-2.37;-2.22;-2.07;-1.91;-1.57;-1.46;-1.28;-0.63;-0.53;-0.29;0.73	548;16683;24410;38758;41203;43625;46089;51477;53201;55832;64758;65843;68202;73942	1.04E+00;6.39E-01;7.52E-01;1.22E+00;1.04E+00;8.97E-01;7.91E-01;7.89E-01;6.88E-01;6.38E-01;6.51E-01;5.36E-01;4.94E-01;2.81E-01	3500;9240;11599;12684;21610;24241;25965;31359;33817;36239;38668;53059;60757;76894	4.60E-01;5.50E-01;6.88E-01;9.19E-01;7.49E-01;8.53E-01;1.03E+00;1.02E+00;1.18E+00;1.39E+00;1.66E+00;1.02E+00;8.90E-01;4.31E-02
GACAT3	-0.533336	0.82455	1	CAAGGCAGGCAGATCACCTG	-0.53	65843	0.0705	11599	0.825
RPL18	-1.96634	0.664489	4	CCGCCATAACAAGGACCGAA;TCAGGAGGTACCCAAACTGA;ACAACCTCTTCAACACAACC;TCCTGGCCGGGAAAACAAGA	-2.37;-2.33;-1.91;-1.25	38714;39440;46086;56275	6.02E-01;4.26E-01;4.67E-01;5.55E-01	21170;31354;37983;38728	3.77E-01;4.58E-01;6.19E-01;1.20E+00
ADRA2A	-2.46857	0.614437	4	ATGATGGCCTTGATGCGGCG;TGGTCGTTGATCTCGCAGCG;TCCAGCGCGTCGGTGTCGCG;GACGAGCACGTTGCCGAACA	-4.14;-3.66;-2.7;0.64	5438;12457;32553;73692	6.46E-01;9.61E-01;7.64E-01;8.62E-02	3750;44904;64985;72001	7.78E-01;4.48E-01;4.20E-01;1.27E-01
ADRA2B	-2.62966	0.841903	4	CGGACACTCGAAGTCCACTG;TGGAGTTGTACTCCAGCGCG;CAGCCCCGACCCGACCATGG;TGGTCGCCCTTGTAGATGAG	-4.32;-4.25;-0.98;-0.97	3709;4334;60341;60428	7.82E-01;1.78E+00;3.79E-01;4.31E-01	17014;17101;73108;73733	3.79E-01;7.50E-01;7.25E-01;8.52E-02
ADRA2C	-1.32202	0.835791	4	ACACAGATGCACGATCGACG;CTACGCGCGCATCTACCGAG;ATGGTGGCCTTGACGCGGCG;TGTACCAGGTCTCGTCGTTG	-3.25;-2.97;0.18;0.76	20640;26932;71916;74027	3.76E-01;5.10E-01;6.41E-01;7.83E-02	3415;5526;50490;56818	8.12E-01;1.58E+00;4.14E-01;5.38E-01
TEX26	-2.29921	0.46307	4	CTTCGGAATTCAGTGTCTGG;ATGATCTACCGAATTAAGGC;TACCTCACTGTCAACAAACG;AGTCCTCATAGTGGTAGCAT	-3.55;-3.39;-1.62;-0.65	14468;17691;50754;64573	3.96E-01;7.30E-01;4.11E-01;3.16E-01	12869;26688;59768;62987	4.14E-01;5.14E-01;3.77E-01;3.59E-01
TEX22	-2.73244	0.995223	5	AGGGACTGCAGACTCAGGAC;CTGGGCCTGATAGCAGCCTG;AGCAGGAAACTGTCCCCCCG;CGTCGATGCTGACGCTCCAG;GAGAATCGCTTGAATCCGGG	-5.09;-4.28;-2.67;-2.07;0.44	170;4009;33300;43664;73043	1.96E+00;1.64E+00;5.88E-01;6.57E-01;1.27E-01	4399;33788;44142;73434;77272	6.48E-01;4.67E-01;4.65E-01;6.79E-01;4.74E-03
FAM45BP	-0.78265	0.874671	2	GTATCACCCCAAGATAGAAG;GTGCACGTAAGAGTGAAGGA	-1.64;0.08	50279;71359	3.42E-01;7.10E-02	6083;27163	8.39E-01;9.10E-01
TEX28	-2.41901	0.498243	4	GGAGTCCTATCACAGCCTAA;ACAACTTACAGGATAGTGTC;CAGGAGGAGAAGTGTAGGTG;AAGCGACTCTCCAAGATGAA	-3.49;-3.44;-2.33;-0.41	15552;16609;39380;67081	3.87E-01;7.69E-01;5.88E-01;2.49E-01	10361;38062;60843;61880	4.59E-01;4.26E-01;3.81E-01;3.90E-01
TEX29	-2.51438	0.546637	4	AGCACCCGAGCTCCTGGCAT;GTGGCAGCGCGACATCCACA;TAGTCACAAATGTCATACAG;CCCAGCGATGATCACAATCA	-3.66;-3.09;-3.0;-0.31	12476;24173;26314;68069	4.20E-01;5.58E-01;9.85E-01;2.24E-01	9373;51139;53285;64954	4.83E-01;5.20E-01;3.91E-01;3.05E-01
SYT8	-0.550197	1.42743	4	AGCAGGTCTCGTCAAACACG;AATAAGCCCAGGTATAGCTG;AGACGCTGACCCGGGCATAG;TCAACTTCAAGCGCTTCTCG	-1.38;-0.86;0.0;0.04	54397;61953;70528;71078	1.13E+00;8.14E-01;5.69E-01;1.49E-01	6364;6776;15489;23045	5.95E-01;1.42E+00;1.59E+00;2.11E+00
SYT9	-2.1825	0.440629	4	AAAAACACTTCATCAAACAC;ACCACAGGCAGTGACCACAA;CATTACTGACCGGGCCGACG;AACCAGAGTTATATAAGCAG	-3.59;-3.0;-1.24;-0.9	13713;26321;56547;61356	4.04E-01;5.20E-01;3.77E-01;4.04E-01	16086;20895;51121;63744	3.84E-01;6.33E-01;4.08E-01;3.38E-01
LINC01250	-1.03094	0.781511	2	GGAATCTCACTCTGTCACCC;CAAGGCAGGCAGATCACCTG	-1.53;-0.53	52067;65843	3.56E-01;1.41E-01	11599;25378	5.94E-01;9.69E-01
MTCH2	-2.26235	0.56018	7	CATTACCAGGAGAGTGACAA;TTACCATAACTAAAGAGACC;ACTGCAAACATACCATGGAA;GCCGAGGCGGGCAGATCACG;GGAATCTCACTCTGTCACCC;AGCACTTTCACGTACATGAG;CAAGGCAGGCAGATCACCTG	-4.04;-3.97;-2.82;-1.91;-1.53;-1.03;-0.53	6686;7665;30085;46089;52067;59622;65843	4.54E-01;9.13E-01;5.42E-01;5.36E-01;5.09E-01;4.74E-01;4.93E-01	11599;17820;25378;31359;47357;69782;70758	4.02E-01;5.22E-01;5.99E-01;7.03E-01;5.67E-01;4.31E-01;2.74E-01
MTCH1	-1.18882	0.807939	4	TACCCCGAGTCACAGTAGAG;CTGCATCATCATCTCGTAGG;TGCCACGAAAAGAGCCTCAG;TGGGACGGGAGGCCAAGTAC	-3.1;-1.48;-1.18;1.02	23908;52746;57386;74589	3.89E-01;5.48E-01;3.75E-01;6.52E-02	2853;20056;24696;53520	8.80E-01;6.56E-01;1.05E+00;6.42E-01
LINC01254	-1.40634	0.518365	1	TCGCCCAAGCTAGAGTGCAG	-1.41	53961	0.157	23475	0.518
SYT1	-2.02301	0.58516	7	CACGCCATTCCTCAGTTACA;CTGCCCGCCTTGGACATGGG;GCCGAGGCGGGCAGATCACG;TGTTTCTTTCAGTGCCACCG;GGAATCTCACTCTGTCACCC;CAAGGCAGGCAGATCACCTG;GTACCATACTCGGAATTGGG	-4.33;-3.82;-1.91;-1.78;-1.53;-0.53;-0.25	3647;9791;46089;48068;52067;65843;68552	6.08E-01;7.68E-01;7.03E-01;5.47E-01;5.09E-01;4.02E-01;3.71E-01	8890;11599;25378;29374;31359;67649;73793	4.13E-01;6.79E-01;5.99E-01;7.61E-01;1.09E+00;4.05E-01;1.47E-01
SYT2	-1.74169	0.690633	5	AACATGAAGGACATGAAAGG;GACAACTCCACTGAGAGTGG;AATATGAGACCAAAGTCCAT;GCAATGGCGATCAGTGCCCA;CAAGGCAGGCAGATCACCTG	-4.41;-1.58;-1.38;-0.8;-0.53	2952;51265;54317;62656;65843	7.87E-01;7.72E-01;5.12E-01;3.88E-01;3.52E-01	11599;14786;23125;26177;74494	4.07E-01;7.14E-01;8.83E-01;1.36E+00;8.43E-02
SYT3	-1.85519	0.678619	8	TTAAGCCAGAGCTGTACCAG;GGGCCTAGGTCTTTGCGCAG;ATACGAGTCCATGTCCAAGT;GCAGGTCATTGCAGAGTACG;GCCGCAGGTACTGCTTTCTA;CCTGGAGGCCCAGTTACCAG;AGAACATGAACGTCATCTGT;CGAGCCATAGAGGTACCGCA	-3.47;-3.26;-3.26;-2.4;-1.15;-1.07;-0.6;0.38	15938;20448;20502;38283;57770;58962;65052;72826	4.84E-01;5.08E-01;6.51E-01;5.63E-01;6.74E-01;5.08E-01;4.23E-01;2.13E-01	4616;12390;18480;19672;39159;56955;56971;61522	5.08E-01;5.99E-01;7.11E-01;1.04E+00;6.50E-01;5.08E-01;6.08E-01;8.00E-01
SYT4	0.81394	1.88074	4	GATAATTCAATTCCCGAGAG;AGAGAGAGACTGTGAAGACC;GAAGAGAAACAAGAGAAGCT;ACATGCACAAACTTGTATGG	-1.92;-0.23;-0.01;5.41	46027;68775;70416;77336	7.99E-01;1.23E+00;5.64E-01;2.36E-03	106;7026;8667;31410	2.26E+00;1.39E+00;2.30E+00;1.57E+00
SYT5	-2.02023	0.587577	4	TCCCGGCCGTGGGGACATAG;CTCTCGCAATGACGCCATCG;GAGGCCTGAGACCAGCACGA;GGGCCAGAGTTACATAGACA	-3.16;-1.79;-1.7;-1.43	22742;47919;49370;53603	3.83E-01;4.76E-01;4.25E-01;6.39E-01	23839;28072;29523;54692	3.89E-01;4.94E-01;8.63E-01;6.04E-01
SYT6	-2.02924	0.456559	4	TGAGGTGCAGATGTCGGTCA;CGGTCTCGTAATCGTAGCGT;ATATTGGATATCCTTCCAGA;CCTCGCCAATCATGTCATGG	-3.69;-2.79;-1.37;-0.27	11946;30811;54464;68447	4.28E-01;4.63E-01;3.84E-01;2.14E-01	8995;22977;46648;65509	4.94E-01;5.83E-01;4.59E-01;2.91E-01
SYT7	-2.06365	0.519207	4	GTCCATCCCCCTTAACAAGG;GGTGTCAGCGCAAACTGGTG;CACTAGACTCACCTTCAAAG;CCCACGATGAGTCCGACCGC	-3.18;-2.37;-1.64;-1.06	22317;38755;50270;59106	3.81E-01;4.26E-01;4.16E-01;4.69E-01	18336;27172;38665;55109	3.76E-01;5.07E-01;6.03E-01;5.91E-01
TIAL1	-2.79077	0.697424	4	ACTGTGGAGGAATTGCGTCT;TTAGGAGGTCAAAGTAAACT;AATGCGATTGTGCATATGGG;AAGCTGTAAAATGATAACAG	-4.21;-3.83;-2.25;-0.88	4758;9676;40753;61711	6.92E-01;1.14E+00;5.59E-01;3.94E-01	15731;36689;67755;72679	3.86E-01;4.28E-01;4.75E-01;1.10E-01
FUBP3	-2.51146	0.555853	5	AAAGACCAAGCTGACTTTCG;ACGGTGCCAGCCGATAAGTG;TACTCCGTATCCATATACTG;CATGCTGACACCGATCCGGA;CAAGGCAGGCAGATCACCTG	-3.56;-3.5;-2.74;-2.22;-0.53	14165;15368;31907;41176;65843	3.90E-01;6.93E-01;6.17E-01;7.28E-01;3.52E-01	11599;36266;45511;62084;63272	4.07E-01;4.82E-01;4.62E-01;3.88E-01;4.39E-01
FUBP1	-2.64478	0.866484	4	ATGATGGGACAACACCCGAA;TGATTGTAACAGGAACGGGC;GAGAAGTTCGGAATGAGTAT;CAAAAATTGGAGGTGATGCA	-4.47;-4.33;-1.98;0.2	2474;3628;45043;72044	9.36E-01;1.92E+00;4.82E-01;1.25E-01	5398;32399;73814;74968	6.49E-01;4.49E-01;7.90E-01;5.64E-02
SCHIP1	-1.53172	0.957446	10	CCAATCCATAGGTGGCACCG;TGATAGAGACACTACTGAAG;TACAGCTGGTATAAATTCCT;GAGGACGAGCGCGACCAGCG;GCCGAGGCGGGCAGATCACG;CAGTAAGACTGAAACCAGCT;GCTGCTTACAAGATCAGCGA;CAAGGCAGGCAGATCACCTG;TACGGAACCAGGGCCAGGCG;AGATTTGCACTCGGAGCAAG	-3.44;-3.08;-2.37;-2.22;-1.91;-1.57;-0.63;-0.53;-0.29;0.73	16683;24410;38758;41203;46089;51477;64758;65843;68202;73942	6.15E-01;6.65E-01;9.33E-01;7.53E-01;6.89E-01;6.40E-01;8.22E-01;5.60E-01;4.20E-01;2.01E-01	3500;9240;11599;12684;25965;31359;36239;38668;53059;60757	5.26E-01;6.35E-01;8.88E-01;1.29E+00;8.58E-01;9.35E-01;1.05E+00;1.36E+00;9.80E-01;1.05E+00
MARCO	-2.07471	0.542778	4	CAGCCGCCAGAGTGTCATTG;GGTGAACTTCTCCCTAGCTG;ACCTGGCTCAGGGTGCATCG;GACAACTTCACTCAGAACCC	-4.4;-2.87;-2.75;1.72	3053;29183;31610;75547	8.55E-01;4.80E-01;7.93E-01;4.30E-02	1895;45832;48287;74390	1.04E+00;4.56E-01;4.38E-01;6.98E-02
SAP30	-1.94315	0.55919	5	TGGTGAGCGGTGCGGCCGGG;GGGGTATCAATATCTTGAAC;GCAGGCAGCACAGTTGCCCG;GGAATCTCACTCTGTCACCC;GGCCGCGGCAGCGACCACTG	-3.26;-2.92;-2.05;-1.53;0.05	20387;27960;43919;52067;71201	4.11E-01;4.68E-01;4.66E-01;4.75E-01;1.82E-01	6241;25378;33525;49465;57052	5.41E-01;4.86E-01;5.83E-01;5.22E-01;6.64E-01
NBL1	-3.13784	1.17226	8	AGTGCCAGCTTGTTGATGGG;AGTACTCACAATCTCCCACA;CAGCCAGTAGCATGGCAGGG;AAGAACATCACCCAGATCGT;ACCAGGGACTCTGTGGACTG;AACAGTGCCAGCTTGTTGAT;GGGCAGCCAGTAGCATGGCA;ACAGTGAACCAGGGACTCTG	-4.88;-4.1;-3.34;-3.22;-3.21;-2.26;-2.13;-1.97	544;5948;18834;21339;21601;40523;42685;45172	1.27E+00;9.90E-01;6.99E-01;9.54E-01;1.45E+00;8.84E-01;1.26E+00;1.87E+00	32270;34757;36919;55841;56117;58589;71502;76898	1.12E+00;8.01E-01;6.23E-01;9.41E-01;6.31E-01;5.07E-01;4.55E-01;2.44E-02
C3orf67-AS1	-1.89872	0.61284	5	TTTCCATGAGGTGCTGATCG;ACAGATCAGTTCATTAACAG;GCAGGTCTCCTGTTACTCAG;CCTGATTGATCAGGAGACTG;ATGAAGATATCCAGCGAGGT	-3.27;-2.26;-2.22;-1.06;-0.68	20255;40575;41195;59147;64149	4.10E-01;5.28E-01;4.82E-01;3.96E-01;4.09E-01	13293;18295;36252;36867;57200	3.94E-01;6.04E-01;5.37E-01;8.71E-01;6.58E-01
HSFX2	-1.25092	1.23355	8	GAAGCTCTTTATCGAAGTTG;TTCTCTTCATCCTCACGAGG;GAGGGGACAGGATCATGGCT;TAGGTCTCTGACTGCAACTG;CCACTGGGAGCCCTAACTTG;TCCACAGTTTCTGTGGAAAG;GTCTCCGAATGAGAATGACC;CCTCAAGTTAGGGCTCCCAG	-2.44;-2.34;-2.0;-1.73;-0.79;-0.59;-0.09;-0.04	37622;39331;44708;48926;62873;65246;69873;70173	1.43E+00;9.89E-01;8.37E-01;6.88E-01;8.81E-01;6.05E-01;4.20E-01;3.42E-01	7269;7569;12196;14569;28516;32718;38111;39820	4.24E-01;8.41E-01;1.03E+00;1.42E+00;1.02E+00;1.27E+00;1.55E+00;2.31E+00
HSFX1	-1.14374	1.24527	7	GAAGCTCTTTATCGAAGTTG;TTCTCTTCATCCTCACGAGG;TAGGTCTCTGACTGCAACTG;CCACTGGGAGCCCTAACTTG;TCCACAGTTTCTGTGGAAAG;GTCTCCGAATGAGAATGACC;CCTCAAGTTAGGGCTCCCAG	-2.44;-2.34;-1.73;-0.79;-0.59;-0.09;-0.04	37622;39331;48926;62873;65246;69873;70173	1.20E+00;8.06E-01;7.90E-01;9.95E-01;6.55E-01;4.33E-01;3.00E-01	7269;7569;12196;14569;28516;38111;39820	4.39E-01;9.21E-01;1.16E+00;1.63E+00;1.25E+00;1.30E+00;2.02E+00
DRC7	-3.01131	0.801058	4	TTTCATAAAACTCAATGACA;GCATGTACTCCCATCTCACA;GTATACCATCAAACCCCCCA;GCCCCGTACCTCAATAGCAA	-3.97;-3.85;-2.92;-1.31	7617;9370;28099;55417	5.40E-01;1.17E+00;9.15E-01;5.81E-01	22025;49341;68077;69825	3.80E-01;4.94E-01;4.83E-01;1.80E-01
DRC3	-2.62305	0.562483	4	ATGTACGCTGAGGACTCAGA;ACTCCGAAAGTCCAGCTGCA;CTCTAGGAACCCTATCTCTG;TGGTCAGAAAAAGCTTGCGG	-3.95;-2.66;-2.41;-1.47	7820;33390;38148;52967	5.32E-01;4.43E-01;6.15E-01;6.60E-01	24475;39294;44052;69614	3.93E-01;4.26E-01;4.98E-01;1.85E-01
DRC1	-2.12696	0.517387	4	GTAGGACTCTGGTTCCGCGG;GTTGGTGACAAATATCCAGG;CTGCGCGCTTAGAAGCCCGG;TGTGATGAAAACCTTTCGTG	-3.13;-2.76;-1.32;-1.29	23281;31475;55214;55644	3.86E-01;4.57E-01;3.81E-01;5.74E-01	21798;22234;45949;54138	3.79E-01;6.00E-01;4.69E-01;6.22E-01
C1orf53	-1.84406	0.53074	4	AGGGAGTCTCACCGCGCAGG;CTTACCCAGAGAGGTGCTGG;GAGCGAAGAGTTAACCGCGG;ACCCTCTGCCCTGCTAACGA	-4.08;-1.95;-1.76;0.42	6230;45499;48376;72957	6.02E-01;4.53E-01;4.37E-01;1.04E-01	4485;29066;31943;71212	7.13E-01;4.82E-01;7.83E-01;1.46E-01
C1orf52	-1.5316	0.892642	4	GATCCGGCGAAGTCGGCGGG;GATGTTATCCTCCTCGTCCG;GCTTGCTTAACAGCCTCCAA;TCAGTGGTGTAGGTCTCAGG	-1.74;-1.68;-1.5;-1.21	48730;49673;52537;57019	8.92E-01;4.98E-01;3.96E-01;5.32E-01	20423;24905;27769;28713	3.76E-01;5.44E-01;9.27E-01;1.72E+00
C1orf50	-1.44125	0.844637	5	TTTGCAAGAACAAGCCAGGA;TGTAATATAGTGAAAAAACC;TATCTCTATAAACGGGAGAG;CAAGGCAGGCAGATCACCTG;CGAGCGCCACGAGGTCTAAG	-2.65;-2.49;-1.31;-0.53;-0.22	33631;36636;55351;65843;68867	6.53E-01;4.85E-01;5.27E-01;4.07E-01;2.55E-01	8575;11599;22091;40806;43811	4.61E-01;8.61E-01;9.26E-01;7.39E-01;1.24E+00
C1orf56	-1.04029	0.933701	4	CGGGTCAGTTTACGCTTTGG;CCGGTCGTCCGCCATTAACG;GAAGACAAGGATAATCCTAG;CAGTGCGACTCCCAATACAG	-2.98;-2.39;0.06;1.15	26751;38317;71240;74856	4.12E-01;4.26E-01;6.03E-01;5.90E-02	2586;6202;39119;50702	9.19E-01;1.49E+00;5.93E-01;7.36E-01
C1orf54	-1.57436	0.696965	4	AGAGGATGAATATTATCAGG;GTGGACTTACCCAGGATAAG;CATGTACTCACCATAACTGG;CTACTGAGGGTAGAACAGGT	-2.8;-2.13;-0.98;-0.39	30547;42713;60375;67295	4.55E-01;4.35E-01;3.79E-01;2.44E-01	10147;17067;34729;46895	4.64E-01;7.52E-01;7.01E-01;8.71E-01
2018-03-01	-0.491328	1.31781	5	CCGCCAGCGACGCCTCAGAA;GAAGCTGGTTATCCACTGGG;TCTCAGTGCAGCCTACACAA;GAGAATCGCTTGAATCCGGG;AACAAGTCTGCTATTTGATG	-2.95;-2.62;0.0;0.44;2.67	27456;34244;70698;73043;76332	5.12E-01;4.69E-01;1.24E+00;6.48E-01;3.13E-02	1110;4399;6899;43198;49986	1.17E+00;1.57E+00;2.23E+00;6.69E-01;9.51E-01
2018-03-02	-1.50086	0.85602	4	GAGCGGGCAGTAGTCTGGGT;CAATTTGAGACAAACATGAA;ATGGAGATGAGCACGAGGCG;AGTCTCTGCCTTTAATGTCA	-1.87;-1.8;-1.4;-0.93	46800;47754;54063;60995	8.25E-01;4.75E-01;3.86E-01;4.15E-01	16447;23379;29688;30639	3.82E-01;5.74E-01;8.57E-01;1.61E+00
LOC102724345	-0.399969	0.87935	1	TCCTGCCTCAGCCTCCCGAG	-0.4	67218	0.0615	10224	0.879
OR7E96P	-1.55229	0.554858	2	CATCTTGGGAACCATGGCCG;GATCCTCTGAGAGTCCCAGG	-2.84;-0.27	29806;68449	3.25E-01;1.07E-01	8993;47636	6.88E-01;4.22E-01
SMPD4	-2.18461	0.68801	10	TCAGGGCCAAGTTCAGACCA;TGGGCAGAGACACGGCCGCA;CCCGGCAGAAGCTGGCGCTG;CGCGCTCATGGTGTTCCGAG;GAGAGATGTGTCGCTTTAGG;GAAGAAGGTGCTGAGCACCG;CCGCTCACTTGAACACGTCG;GTGACCAACCTACCTACCCA;CCCCGCTCACTTGAACACGT;GGAGCTGTACGAGCTGGCGC	-4.49;-4.45;-2.52;-2.45;-2.2;-2.19;-1.7;-0.96;-0.93;0.05	2336;2666;36037;37355;41514;41659;49329;60658;61006;71151	6.40E-01;1.39E+00;8.21E-01;6.60E-01;6.20E-01;6.35E-01;6.12E-01;5.24E-01;6.06E-01;3.68E-01	6291;16436;16784;28113;35783;35916;40087;41422;74776;75106	4.21E-01;5.22E-01;6.56E-01;6.13E-01;6.21E-01;7.63E-01;8.73E-01;1.19E+00;6.00E-01;1.33E-01
SMPD1	-1.78706	0.551114	4	AATTCATATTGAGAGAGATG;GGGGGAGGGAAGCTATTGAC;CTGGTGCCAGACATCATGTG;GAACCCAATGTGGCTCGCGT	-3.5;-2.69;-1.04;0.08	15310;32930;59522;71367	3.89E-01;4.46E-01;3.76E-01;1.42E-01	6075;17920;44530;62139	6.10E-01;7.22E-01;4.91E-01;3.82E-01
SMPD3	-1.79527	0.677618	5	CCGCTGGCGCTTCTCGTAGG;GAGTACATCCTGTACGACGT;GCCGAGGCGGGCAGATCACG;TATTCACGGCTGGAAGACAA;CGACGAGGCCTTCGACCATG	-3.08;-2.28;-1.91;-0.86;-0.84	24465;40241;46089;61942;62164	4.61E-01;5.24E-01;4.62E-01;3.88E-01;4.77E-01	15278;15500;31359;37201;52977	3.88E-01;6.88E-01;6.29E-01;8.59E-01;8.24E-01
SMPD2	-3.21878	0.941158	4	CATCTACCTAGCACATCGTG;ACAGGCTTTGACCCTCACAG;CAGCTGCACACCACTTCCGG;TGTAAAGCACGTAGTCAATG	-3.95;-3.6;-3.36;-1.96	7890;13509;18235;45314	5.30E-01;9.05E-01;1.40E+00;9.31E-01	32117;59195;63944;69556	4.78E-01;7.11E-01;4.06E-01;1.87E-01
BRIP1	-2.10783	0.534622	6	CACAGAGATTCCGACCCTTG;AGTTACCGACTACCTCAGGA;GCCGAGGCGGGCAGATCACG;TATGACGCAATCAAATACAA;AGATGAAGCTCATAACATCG;CAAGGCAGGCAGATCACCTG	-3.68;-3.5;-1.91;-1.65;-1.37;-0.53	12102;15501;46089;50187;54445;65843	3.97E-01;6.09E-01;5.53E-01;4.84E-01;5.14E-01;4.23E-01	11599;22997;27255;31359;61955;65330	3.99E-01;4.91E-01;6.25E-01;8.45E-01;4.05E-01;4.43E-01
PDE11A	-2.21286	0.489433	5	ATGGCAAGTTCTGACACCAG;CCCTGAGTAGTGTACGACGG;AATGCAAAGTCCTACCTGGT;GAATAGTCCATCGCAGAGCA;AGAAATCATCATACTCCGAC	-3.65;-3.6;-2.76;-0.78;-0.29	12694;13629;31549;62969;68220	3.97E-01;7.61E-01;6.24E-01;3.89E-01;2.75E-01	9222;14473;45907;63827;64750	4.45E-01;7.26E-01;4.62E-01;3.92E-01;3.89E-01
TTC28	-0.460089	1.41604	7	GATGAACAACAAACTCAACT;GCCGAGGCGGGCAGATCACG;GGAATCTCACTCTGTCACCC;TTCTAGGCATACTTCCGACA;ACCAGGCGGTCAAATACCAT;CAAGGCAGGCAGATCACCTG;GCAGTGCCTATCACTACCGG	-2.33;-1.91;-1.53;-1.52;-1.4;-0.53;6.01	39468;46089;52067;52175;54011;65843;77390	1.30E+00;1.09E+00;9.11E-01;6.01E-01;4.99E-01;4.02E-01;2.00E-03	52;11599;23431;25267;25378;31359;37974	2.33E+00;6.79E-01;6.39E-01;9.16E-01;1.45E+00;1.74E+00;2.17E+00
TTC29	-2.04508	0.467187	4	CCTGTACCATTACCTGACCA;CTACAAGAAGAATATCTGTG;CTGAAATAGCCAAAGAAGGT;GCATATGGGTCTTCTCTACG	-3.8;-2.21;-1.46;-0.71	10055;41402;53147;63802	4.66E-01;4.30E-01;3.92E-01;3.37E-01	13640;24295;36029;67381	4.05E-01;5.56E-01;6.67E-01;2.42E-01
TTC24	-2.16619	0.533407	4	CAGCTGTCTCTCTTGAGCAT;CGGCGACCAATGTTTCAATG;AGCTTCCTGATAGTTGCCGA;CTCCAAGGCCCCACAAACCA	-3.39;-3.36;-2.8;0.88	17649;18340;30650;74312	3.77E-01;7.08E-01;8.24E-01;7.16E-02	3130;46762;59076;59814	8.45E-01;4.64E-01;3.76E-01;4.49E-01
TTC25	-2.95968	0.768402	4	AGCACTTTGAGCGAGCAACC;GCCTCGATGATAGAATACCA;GCAGAAGCCGATCTACGCCA;TTCCCCACAGACCTGATCAA	-4.49;-3.58;-2.67;-1.1	2314;13902;33310;58587	9.62E-01;8.86E-01;7.41E-01;4.85E-01	18855;44111;63524;75128	3.75E-01;4.43E-01;4.01E-01;5.27E-02
TTC26	-1.84539	0.567789	4	TTTCAGATACAATACCAGGG;GAAGTTCAAACGTCATGTTG;TACTATCAGGAATTTGCTGA;TCAGGAATGACATCAACTAG	-3.12;-2.49;-1.15;-0.61	23498;36554;57786;64987	3.87E-01;4.29E-01;3.75E-01;3.05E-01	12455;19655;40872;53961	4.20E-01;6.67E-01;5.56E-01;6.28E-01
TTC27	-1.78892	0.806722	8	GCCGAGTGGAACGGGCAATG;ACTGATTCTAGATGTAAGAA;GCCGAGGCGGGCAGATCACG;CTGAGGGTGTAAGTCAACAG;GGAATCTCACTCTGTCACCC;TCGCCCAAGCTAGAGTGCAG;GGTTAAGATTAATCCCATGC;TCCTGCCTCAGCCTCCCGAG	-3.47;-2.91;-1.91;-1.64;-1.53;-1.41;-1.03;-0.4	15933;28200;46089;50341;52067;53961;59573;67218	4.84E-01;6.10E-01;8.91E-01;7.27E-01;5.68E-01;5.31E-01;5.31E-01;4.92E-01	10224;17869;23475;25378;27100;31359;49259;61526	4.07E-01;5.10E-01;5.91E-01;7.83E-01;1.09E+00;1.36E+00;9.11E-01;7.99E-01
PATL2	-1.36738	0.721265	4	AAACCAGTACCTGAACCTAG;GGTAACGCCTTACATTCCGA;CCCTCGCCGAGCTATTGATG;TGACATTCCCAGCATACCAG	-3.0;-2.58;-1.03;1.14	26349;34993;59566;74825	4.08E-01;4.34E-01;3.77E-01;5.97E-02	2617;17876;42465;51106	9.14E-01;7.23E-01;5.26E-01;7.22E-01
TTC22	-2.19901	0.561963	4	CCTTGCCGAAGCAGTCTAGA;GGCCCGCGAGTGCTTCCTCG;GCGCTCTACGACAAGGCGCT;CTGGCAGGCGTACTGCACAA	-2.7;-2.68;-2.34;-1.08	32736;33006;39296;58859	4.88E-01;4.45E-01;5.89E-01;4.77E-01	18583;38146;44437;44707	3.75E-01;4.26E-01;4.92E-01;9.54E-01
PATL1	-1.37471	0.990637	5	TGTGTCCGGTCTAAACATTG;GAAGTTCTGAGGCGAATCCG;GGAATCTCACTCTGTCACCC;CCATAGGGAGCAGGATAACG;CTGAACGAGCATTACCAAGG	-2.01;-1.76;-1.53;-0.84;-0.73	44508;48451;52067;62138;63578	1.03E+00;6.88E-01;4.86E-01;3.88E-01;4.28E-01	13864;15304;25378;28981;32934	3.91E-01;6.95E-01;7.98E-01;1.21E+00;1.86E+00
ENO1	-2.34068	0.596567	5	GGAAAGATGCCACCAATGTG;AGGTCCTACCTTGCTAACCA;GGAATCTCACTCTGTCACCC;ACAGCAGCTCTGAAGAGACC;GGTCATCGGCATGGACGTAG	-4.38;-3.69;-1.53;-1.29;-0.82	3163;11916;52067;55770;62474	7.62E-01;8.43E-01;4.86E-01;4.24E-01;4.66E-01	14968;21672;25378;65528;74279	3.88E-01;5.34E-01;7.98E-01;4.04E-01;9.05E-02
ENO2	-2.19693	0.494924	5	ACTGTTCTCCAGGATATTGG;GGCCTCATAGATGCCCGTAG;GCCATCACGATAAAACTCTG;TCCTTCCCGATACATCACTG;GAGAATCGCTTGAATCCGGG	-4.41;-3.0;-2.05;-1.97;0.44	2965;26291;43894;45202;73043	7.86E-01;4.79E-01;4.66E-01;6.17E-01;1.27E-01	4399;32240;33548;51151;74478	6.48E-01;4.63E-01;5.83E-01;4.91E-01;8.47E-02
ENO3	-1.49927	0.687744	4	TCCCAGCGAGATCTGCGATG;TCCCGCACGGCACATCACTG;CAGAGCCTCATAGATACCCG;CTTCCAGAAACTAAGCGTTG	-3.2;-3.13;-0.7;1.03	21854;23332;63894;74627	3.79E-01;5.75E-01;4.06E-01;6.43E-02	2815;13548;54111;55581	8.86E-01;9.03E-01;3.86E-01;5.76E-01
ENO4	-2.41413	0.547609	5	AAGACGTACTAGATGGACTG;CAGAGGTGGATCACCTACTC;GAGACAAAAAAAGGGCACGA;GCCGAGGCGGGCAGATCACG;CCTGTTGAGCCTGTACTCAG	-4.1;-2.54;-2.45;-1.91;-1.07	5997;35749;37415;46089;58974	5.52E-01;4.78E-01;5.21E-01;5.95E-01;5.92E-01	18468;31359;40012;41704;71444	3.97E-01;4.62E-01;4.92E-01;7.12E-01;1.75E-01
RCN1P1	-2.74399	0.387063	1	GACCTTCGACCAGCTCACCC	-2.74	31762	0.387	45680	0.229
LOC728613	-0.173913	0.974839	1	AGGGTCGATAAAGACAGGAG	-0.17	69236	0.0486	8206	0.975
ANKFY1	-2.02362	0.609295	7	TTAGAACTCAAAGACCACGA;AGCTTTGTGACTAACCAGCG;CATATGGCATCAACTACGAG;CCGACACGCTGTGTGCAACG;GGAATCTCACTCTGTCACCC;CAAGGCAGGCAGATCACCTG;TCCTGCCTCAGCCTCCCGAG	-3.27;-3.26;-3.05;-2.12;-1.53;-0.53;-0.4	20159;20406;25272;42826;52067;65843;67218	5.25E-01;5.00E-01;6.01E-01;5.34E-01;5.09E-01;4.02E-01;4.30E-01	10224;11599;25378;34616;52150;57016;57276	4.03E-01;6.79E-01;5.99E-01;6.27E-01;5.08E-01;5.32E-01;9.17E-01
OBSCN	-1.69453	0.619555	4	AGAAGATGTGAGAAATCACG;TGCCGGGGAGTATAGCTGCG;ACACACACACGAGTACTCCG;CAGCTCGAAAGTGCGCATGG	-3.3;-2.88;-0.6;-0.0	19701;29001;65089;70440	3.75E-01;4.82E-01;4.22E-01;1.65E-01	7002;12353;48419;57745	5.65E-01;9.67E-01;4.36E-01;5.10E-01
SRRD	-3.86292	1.70016	4	GCATCTTGACTCATTGCCAG;GCGGAGTTCGAGTCTGACAG;AGGGAAACGGAGTATTCGCG;GTTTCTAGCTACGATGCAGG	-4.77;-3.61;-3.55;-3.52	891;13295;14448;14951	1.35E+00;9.16E-01;1.68E+00;2.86E+00	62488;62978;64125;76553	1.63E+00;8.59E-01;4.08E-01;2.00E-02
MCL1	-3.16963	0.998269	4	CCAAAAGTCGCCCTCCCGGG;AGTCGCTGGAGATTATCTCT;AGGCGCTGGAGACCTTACGA;GTAATAACACCAGTACGGAC	-4.49;-4.15;-2.1;-1.93	2325;5339;43111;45824	9.60E-01;1.61E+00;5.14E-01;9.12E-01	31618;34331;72109;75114	4.71E-01;4.37E-01;6.53E-01;5.30E-02
SORBS1	-2.4974	0.585192	5	AGTGAAGAGGGAATCAGACG;TACTCGAAACAGCTCCCGTG;ACCTGGTTAATACTGACAGA;GTGCTCTTGCAACACAATCG;TCGCCCAAGCTAGAGTGCAG	-3.53;-2.82;-2.41;-2.32;-1.41	14751;30129;38117;39540;53961	3.88E-01;4.62E-01;5.12E-01;7.79E-01;7.84E-01	23475;37889;39310;47314;62691	4.47E-01;4.96E-01;4.99E-01;5.67E-01;4.59E-01
SORBS3	-1.69083	0.625392	4	GCCAGGTCTGATACCACGCA;AAGCGCTGGGTCAAGTACGA;TCACCTCCACATAATTAGCA;TTCTAGGTAACTCTTCAGAG	-3.13;-2.12;-1.01;-0.5	23266;42882;59898;66199	3.86E-01;4.36E-01;3.77E-01;2.72E-01	11243;17544;34560;54176	4.40E-01;7.35E-01;7.06E-01;6.21E-01
SORBS2	-2.62885	0.698104	6	AGCCAGACACGAAAACACCG;AGTAATCTAACTCACTGGAG;TCAAAGCCCCGCATTACCCA;CCCGGACCCGAAAGTCAAGT;GGAATCTCACTCTGTCACCC;CAAGGCAGGCAGATCACCTG	-3.88;-3.74;-3.68;-2.41;-1.53;-0.53	8891;11040;12045;38121;52067;65843	4.27E-01;7.83E-01;1.34E+00;6.44E-01;5.68E-01;4.23E-01	11599;25378;39306;65414;66390;68537	3.99E-01;4.83E-01;5.05E-01;7.35E-01;4.02E-01;3.18E-01
ODC1	-1.79067	0.55921	4	GAAGGGGCTTTACATGTGCG;CAACGCTGGGTTGATTACGC;ATGTATCTGCTTGATATTGG;CTGCACGAAGGTCTCAGGAT	-3.45;-2.11;-1.74;0.13	16327;43049;48830;71692	3.82E-01;4.37E-01;4.31E-01;1.34E-01	5750;28612;34393;61113	6.28E-01;4.87E-01;7.10E-01;4.11E-01
IL18RAP	-1.12329	0.972505	4	TTGGTGAGAGTCGATTTCTG;TCTAATGGATCTCCATTCGA;TCACAGGATGCATTTGTCTG;TGAAGTTTATGACTATCACC	-3.05;-0.73;-0.67;-0.05	25283;63579;64349;70107	3.99E-01;8.87E-01;4.11E-01;1.73E-01	7335;13093;13863;52138	5.51E-01;9.27E-01;1.73E+00;6.87E-01
EOMES	-1.65738	0.667781	4	GCTTAGTGACACCGACGCCG;ACTTCAACAATATGCAGTCG;CCTCTACGAACACATTGTAG;CTCACTCTTCCCGTACCAGG	-3.09;-2.81;-0.43;-0.3	24225;30405;66889;68181	3.91E-01;4.67E-01;4.54E-01;2.21E-01	9261;10553;47037;53236	4.86E-01;1.08E+00;4.54E-01;6.51E-01
BCDIN3D-AS1	0.830982	1.3791	1	CTGGATCTATGTCGCAGCAG	0.83	74207	0.0185	3235	1.38
KCTD21-AS1	0.444531	1.24562	1	GAGAATCGCTTGAATCCGGG	0.44	73043	0.0254	4399	1.25
CGB1	-2.00732	0.888094	23	CGGTAGTTGCACACCACCTG;TGCCGGCTACTGCCCCACCA;AGCCACGGCGTAGGAGACCA;TGGACTCGAAGCGCACATCG;ACAGCTGAGAGCCACGGCGT;CCACGGCGTAGGAGACCACG;CGTGCTGCAGGGGGTCCTGC;CCAAGGAGCCGCTTCGGCCA;CAGGACCCCCTGCAGCACGC;GGGCATCCAAGGAGCCGCTT;CCCCGTGGTCTCCTACGCCG;TCCAGACCCGCGTGCTGCAG;CCGGGCAGCTCACCATGGTG;GCATTGATGGGGCGGCACCG;GCCCTCCTTCTCCACAGCCA;GGGCGGCACCGTGGCCGAAG;CCGCCCCATCAATGCCACCC;CCGTGGCCGAAGCGGCTCCT;GCCACGGCGTAGGAGACCAC;…	-4.44;-4.13;-3.37;-3.15;-3.12;-3.1;-3.08;-3.02;-2.21;-2.16;-2.16;-2.0;-1.72;-1.56;-1.5;-1.45;-1.16;-0.93;-0.85;-0.82;-0.66;-0.57;1.0	2698;5576;18042;23021;23675;24089;24536;25808;41347;42134;42183;44680;49113;51576;52494;53263;57670;61003;62066;62417;64446;65413;74554	4.35E-01;5.64E-01;9.54E-01;1.07E+00;8.99E-01;7.90E-01;7.52E-01;7.68E-01;1.18E+00;1.02E+00;8.72E-01;8.45E-01;8.80E-01;8.45E-01;7.78E-01;7.50E-01;7.30E-01;7.04E-01;6.88E-01;7.62E-01;8.23E-01;1.06E+00;3.80E-01	2888;12029;12996;15025;15376;16439;19772;24179;24948;25861;28329;32764;35259;35287;36079;51616;52927;53332;53767;54422;59411;71861;74744	4.30E-01;7.54E-01;6.73E-01;6.81E-01;7.14E-01;7.96E-01;8.09E-01;7.92E-01;8.79E-01;9.99E-01;1.05E+00;9.80E-01;1.02E+00;1.24E+00;1.46E+00;7.68E-01;8.03E-01;9.23E-01;1.12E+00;1.40E+00;1.28E+00;4.95E-01;3.54E-01
PDSS1	-2.82969	0.662674	4	CCGGCCGTGCGGGACCGTTG;TATGATGAATATTGCATGCT;GTTATTGAAGATTTGGTGCG;TATACGACATACATTTGGAC	-4.2;-3.0;-2.92;-1.2	4815;26237;28132;57139	6.88E-01;5.21E-01;9.13E-01;5.28E-01	20303;49288;51205;72621	3.75E-01;4.93E-01;4.07E-01;1.12E-01
LOC105374836	-0.202751	1.45675	4	GGAAATCGCCAGCTTCGATA;AATGGCAGACAAACCAGACA;TAAGGCCAAGCTGAAGAAAA;GGCAGACAAACCAGACATGG	-1.97;-0.51;-0.18;1.85	45133;66134;69203;75673	7.71E-01;1.03E+00;5.18E-01;4.01E-02	1769;8239;11308;32309	1.07E+00;1.27E+00;1.97E+00;1.52E+00
LOC105374839	-1.91411	0.392609	1	GCCGAGGCGGGCAGATCACG	-1.91	46089	0.225	31359	0.393
LOC105374838	-1.22372	0.689604	2	GCCGAGGCGGGCAGATCACG;CAAGGCAGGCAGATCACCTG	-1.91;-0.53	46089;65843	3.17E-01;1.41E-01	11599;31359	5.94E-01;7.85E-01
FBXO18	-2.06346	0.471123	4	GACGGCATCCTGTCTAACTG;GGTCTCGGTGACATCTGGCA;CACTGGGAAGACCTCAACGC;AAGCAGAGGACAGTACGTCT	-4.45;-2.36;-1.49;0.06	2594;38848;52648;71204	9.17E-01;4.26E-01;3.95E-01;1.46E-01	6238;24794;38594;74848	6.01E-01;5.46E-01;6.05E-01;5.92E-02
FKBP15	-3.08698	0.847873	4	TTACCACAGATGACCTCACA;CGACTTACTATCGATATGCA;AATTCGCAAGTCATACCAGG;AACTAATTGAACGAAATCAG	-4.15;-3.74;-3.11;-1.35	5358;11080;23799;54803	6.51E-01;1.04E+00;1.09E+00;6.01E-01	22639;53657;66373;72078	3.83E-01;5.66E-01;4.44E-01;1.25E-01
UBE2J1	-2.07248	0.514554	5	TTCTCTAGATTACACTCCTG;TAACACTTACTACTCCACGA;GCTAATGGTCGATTTGAAGT;ATGGAGGAGTTTATCACGGG;TCCTGCCTCAGCCTCCCGAG	-3.38;-2.86;-2.25;-1.47;-0.4	17913;29290;40665;52999;67218	3.94E-01;4.64E-01;4.86E-01;4.61E-01;3.07E-01	10224;24442;36788;48134;59507	4.26E-01;4.96E-01;5.30E-01;5.49E-01;5.72E-01
UBE2J2	-3.60457	1.31287	4	ATATGATCACTCCCAACGGG;CTCCGACCACGGCAACCCAG;AGAATCCTTACCTTCATAAG;TACCACTCGAGAATATTCGA	-4.92;-3.77;-2.97;-2.76	439;10584;26970;31488	1.65E+00;1.08E+00;9.58E-01;1.56E+00	45941;50455;66874;77003	7.97E-01;5.10E-01;4.54E-01;9.85E-03
FKBP11	-3.27681	1.04545	4	CACTTGGCCTATGGAAAACG;TCCCGTCCGGACCCTCCAAG;CAGAGGGTCTCTGGTCAGGG;GTCTTCTCGACATGTGTGTG	-4.17;-3.69;-3.61;-1.64	5157;11898;13266;50420	6.64E-01;9.94E-01;1.78E+00;7.45E-01	27022;64185;65542;72291	4.14E-01;9.18E-01;4.29E-01;1.20E-01
FBXO10	-0.333573	1.28563	4	GCGGTGTATACATAATAGCA;GGGCCTACAAGTATCTACTA;ATACCCACCTTATACATGAT;GCAGCACACACCTCACAACG	-3.29;-1.12;1.15;1.93	19867;58280;74839;75750	3.75E-01;6.82E-01;9.16E-01;3.84E-02	1692;2603;19162;57556	1.09E+00;2.20E+00;1.34E+00;5.16E-01
FBXO11	-0.339059	2.0229	6	GCCGAGGCGGGCAGATCACG;CAAGGCAGGCAGATCACCTG;CCAGCATGGTGGGATTTATG;AACCACTGTAGGGTTAGCAT;AGAGCCTTCCATAAAAACGA;ATATATAACAGATCATGCAC	-1.91;-0.53;-0.24;-0.12;0.07;0.7	46089;65843;68644;69633;71326;73871	1.41E+00;2.26E+00;1.69E+00;1.00E+00;5.03E-01;1.23E-01	3571;6116;7809;8798;11599;31359	6.61E-01;1.17E+00;1.83E+00;2.71E+00;3.42E+00;2.36E+00
FBXO16	-1.20127	0.928791	5	AGTTACAAGCAATTCTCCAG;CTTTACAACCAAGCTTCCAA;GGAATCTCACTCTGTCACCC;GCACAACGACAAAGGCTCCG;CCCGGTCATTCAATAGCTGA	-2.74;-2.09;-1.53;-0.3;0.65	31950;43383;52067;68100;73734	6.10E-01;5.74E-01;4.86E-01;4.43E-01;1.07E-01	3708;9342;25378;34059;45492	7.06E-01;1.00E+00;7.98E-01;9.80E-01;1.16E+00
FBXO17	-0.339948	1.44167	4	CATAGAAAAGAACCTAACAC;GGGCCGCGCACTCTACGCAG;AAGATGAGATTGCGGCCGAA;TGGGCGGCATCGCGTGACCA	-1.95;-1.05;0.76;0.88	45577;59311;74034;74301	7.85E-01;7.15E-01;8.13E-01;7.19E-02	3141;3408;18131;31851	8.44E-01;1.97E+00;1.41E+00;1.54E+00
FBXO15	-0.870831	0.920293	4	GGAGAGGAGCACATTAGGCT;ATAACGTTCAAAGACTCCGA;AAGGCTCACAGCATCCAAGT;GGAACACACTGCGTACCTGA	-2.72;-1.52;-1.37;2.13	32229;52125;54564;75936	4.80E-01;5.37E-01;3.84E-01;3.41E-02	1506;22878;25317;45213	1.13E+00;5.85E-01;1.03E+00;9.35E-01
SFTA3	-2.18993	0.421833	4	CTTCCAACTCATTAGGGACC;TGGCACGCAAACAGCGACAC;AAGTGGTAGATTCTGATACT;CAGGGCAGACTTACACAAAG	-3.87;-3.02;-1.97;0.11	9008;25799;45161;71532	4.93E-01;5.29E-01;4.81E-01;1.38E-01	5910;32281;51643;68423	6.19E-01;4.50E-01;4.03E-01;2.15E-01
SFTA2	-3.10859	0.968749	4	TTCAGTTGCAAAGTCATACC;CTTGGCAGCTCACATGGAAC;TTCCATGTGAGCTGCCAAGG;TGCCAAGGAGGGTCAAGAGG	-4.35;-3.87;-3.45;-0.77	3470;9120;16422;63022	8.06E-01;1.19E+00;1.52E+00;3.58E-01	14420;61020;68324;73972	3.96E-01;7.76E-01;4.90E-01;7.96E-02
CNGB1	-0.990834	1.4834	7	GTGCACAGATGAACCCAATG;GTAGGAGGAAGAGGAAGAGG;GGAATCTCACTCTGTCACCC;GCAGTCCTACCTTTAAACAG;CAAGGCAGGCAGATCACCTG;GGAAGTAGATGAGGTCGCAT;AGGTAACCTGTGTGTCCCCG	-1.86;-1.76;-1.53;-0.65;-0.53;-0.34;-0.25	46899;48378;52067;64479;65843;67741;68569	1.80E+00;1.21E+00;9.11E-01;1.10E+00;6.79E-01;4.06E-01;3.70E-01	8873;9701;11599;12963;25378;29064;30543	4.13E-01;7.73E-01;1.21E+00;1.80E+00;1.45E+00;1.91E+00;2.83E+00
CNGB3	-2.10622	0.498212	4	AGCCCTCTACAAGAAAAAGT;TGAAGCCCAGTAATAAACAC;CAGATCGACTCTATCTCCTG;GGCGCGGAAGTAGTTCTGAT	-3.15;-2.92;-1.39;-0.97	22965;28119;54168;60508	3.84E-01;4.94E-01;3.86E-01;4.29E-01	16934;23274;49323;54478	3.80E-01;5.77E-01;4.26E-01;6.11E-01
BCLAF1	-2.53621	0.539348	4	ATTCATCGATAGACTCAGAT;TAAAGAGACTGGATATGTAG;GCTTGATAGGGGTAATACCA;AGACGACCTTATGGGTACAG	-3.7;-3.03;-2.94;-0.48	11677;25751;27703;66447	4.33E-01;5.29E-01;9.30E-01;2.66E-01	10996;49720;51710;65747	4.45E-01;4.99E-01;4.03E-01;2.84E-01
BCLAF3	-2.14669	0.582396	5	CCAGGCGAATATCCTCTGTG;TTCCCTCCCACCTTACCAAG;GGAATCTCACTCTGTCACCC;TCTGCTATTGACCTCTGAGG;CTTCCTAAGATTGATAGGCG	-4.62;-3.67;-1.53;-0.94;0.02	1582;12356;52067;60915;70969	1.03E+00;8.21E-01;4.86E-01;3.89E-01;1.90E-01	6473;16527;25378;65081;75861	5.31E-01;6.54E-01;7.98E-01;4.00E-01;4.48E-02
PLA2G6	-2.33716	0.557893	5	CCGATCAGCCTAAACAACCT;GCACTATGGCACAGTCGAAG;CTCACAGAGTGGATTCCGGT;ATGGATGTCACCGACTACAA;GAGAATCGCTTGAATCCGGG	-4.49;-3.54;-2.77;-1.33;0.44	2315;14585;31308;55073;73043	8.78E-01;7.22E-01;6.30E-01;4.32E-01;1.27E-01	4399;22369;46117;62841;75127	6.48E-01;5.23E-01;4.62E-01;3.89E-01;6.59E-02
PLA2G7	-1.61805	0.57641	4	TGGATAATATAAACGCAAGA;CTATAAACCCATGAGATGCC;CCTTAGAACCCTGAAACAAG;GAATAAGGCCCATTTCCCCG	-3.91;-3.37;-1.38;2.19	8433;18142;54346;75988	5.11E-01;7.14E-01;3.85E-01;3.29E-02	1454;23096;59315;69009	1.15E+00;5.80E-01;3.76E-01;2.00E-01
PLA2G5	-2.0715	0.523213	4	GTAGAAGCCGTAGTTTGTCA;CCTACAAATACAGATTCGCG;CCTAAAATCAATGATCGAGA;CGCATGACCACTGCTATGGG	-3.05;-2.62;-1.61;-1.01	25276;34268;50796;59874	3.99E-01;4.38E-01;4.11E-01;4.47E-01	17568;26643;43155;52147	3.77E-01;5.15E-01;5.14E-01;6.87E-01
PLA2G3	-3.10363	0.824551	4	ATGAGCACAGAGAGCACCGT;GGAAGCTCAGGTACCCCAGT;CCTGGTGTCACAGTCACAGT;GGCCACTCTTCAGAGTCAGT	-3.76;-3.25;-2.91;-2.49	10717;20672;28246;36652	4.51E-01;6.39E-01;9.09E-01;1.30E+00	40772;49208;56750;66731	6.51E-01;4.92E-01;3.76E-01;2.59E-01
GDPGP1	-1.77953	0.790018	4	TGTTGAAGTTGAACTGTACA;GTGCTGCTGAGCTTACACCC;GAGATTGTGGCAGAGCATCT;CCACGAAACCCACAGCACCA	-2.23;-1.69;-1.6;-1.6	41061;49556;50910;51041	6.58E-01;4.97E-01;4.10E-01;7.24E-01	26401;26532;27886;36381	4.08E-01;5.17E-01;9.23E-01;1.31E+00
CCDC77	-2.70051	0.653595	5	ACAAATTGAAGGGCTCATCG;TTTGGTACCTGATTCTCAGT;TTTGGCCAGACGATCTTCGG;GCCGAGGCGGGCAGATCACG;CATTCTCCAAAAGACTATCC	-4.47;-3.21;-2.62;-1.91;-1.29	2468;21664;34134;46089;55775	8.54E-01;5.34E-01;5.72E-01;5.95E-01;7.13E-01	21667;31359;43318;55779;74979	4.24E-01;4.62E-01;4.69E-01;4.24E-01;7.02E-02
KRTAP1-3	-2.12961	0.48848	4	GTCCCACTAGTTGAGAAGCT;TGGGCGGCACCACCTGATAC;TGCTCCACCAGTGGGACATG;TGCTGCCAGACCAGCTCCTG	-3.42;-2.51;-1.34;-1.25	17116;36223;54960;56306	3.79E-01;4.30E-01;3.82E-01;5.54E-01	21136;22482;41231;60340	3.77E-01;5.94E-01;5.49E-01;4.33E-01
KRTAP1-4	-1.92473	0.571423	5	CCACCCAGATTGCCACGTGG;GGAACCGGCTGTGGCATTGG;GCTGGAGCCACAGGTCCCAC;TGCTGCCAGACCAGCTCCTG;GCAGCTTACCAGGTAGCAGG	-3.15;-3.15;-2.35;-1.25;0.29	22844;22868;39020;56306;72454	4.38E-01;5.15E-01;5.02E-01;4.19E-01;1.45E-01	4988;21136;38403;54593;54598	6.08E-01;5.43E-01;5.09E-01;4.38E-01;7.59E-01
KRTAP1-5	-2.38592	0.605529	5	TGGCATCAGCTATGGCCAGG;TGGGCGGCACCACCTGATAC;TGCTGCCAGATCAGCTCCTG;GTCCCACTGATGGAGAAGCT;AGCTGCCAGACTAGCTTCTG	-4.24;-2.51;-1.87;-1.7;-1.61	4406;36223;46827;49348;50869	6.48E-01;4.82E-01;4.62E-01;5.24E-01;9.13E-01	26573;28094;30615;41231;73031	4.96E-01;4.68E-01;6.46E-01;7.26E-01;1.27E-01
CCDC70	-2.62068	0.650209	4	ACTGGGAGAGGATGCCGCCA;GGAAAGCATGGATCTTGCCT;TATCCTCCTTCCAGAAAGTG;AATGGAAAAGTCTTTCAGGG	-4.64;-2.95;-2.67;-0.22	1456;27401;33163;68895	1.15E+00;5.04E-01;7.46E-01;2.03E-01	8547;44279;50041;75986	5.07E-01;4.44E-01;4.18E-01;3.30E-02
CCDC71	-2.32937	0.474649	4	GTAGACACCTGGATAAAGGT;CAACCTACCATCCTGCGCAG;TGGTGCCCAGAGCCTCGTCG;TTGGCCAGTCTGCCAGATAG	-3.82;-2.37;-1.93;-1.2	9743;38801;45886;57094	4.73E-01;4.26E-01;4.70E-01;5.30E-01	20348;31556;38641;67699	3.76E-01;4.56E-01;6.04E-01;2.34E-01
CCDC78	-0.636609	0.918153	4	TGAAGGATGAGTACGTCCTA;TGGCCACCCACAGATCTCCA;AGAGCTCAGACACAAAGCCC;CCAGGTTGTGCTACGAGCCA	-2.9;-2.18;-1.13;3.67	28409;41794;58112;76852	4.29E-01;4.31E-01;3.75E-01;1.33E-02	590;19330;35648;49053	1.53E+00;6.77E-01;6.77E-01;7.93E-01
HIST3H2BB	-3.18173	0.886143	4	TTCTAAAAAGGCTGTCACCA;AGATAGAATAGCTCTCCTTG;GCTTGTTGTAGTGTGCCAGG;TCGGCTCCTGCGCCCAAGAA	-3.81;-3.3;-3.12;-2.49	9929;19499;23697;36544	4.69E-01;6.72E-01;1.10E+00;1.30E+00	40898;53762;57936;67523	6.54E-01;5.68E-01;3.75E-01;2.38E-01
HIST3H2BA	-3.30473	0.598959	1	AGATAGAATAGCTCTCCTTG	-3.3	19499	0.599	57936	0.126
GHITM	-3.05883	0.801827	4	CATGATGAGAGGCTCTTGGG;AACTGGCCAAGAACTCAAAG;CCACCTATATGTACTTAGCA;GCTCCTCTGACAATATTAGG	-4.47;-3.35;-2.85;-1.57	2489;18438;29585;51501	9.33E-01;7.05E-01;8.61E-01;7.09E-01	25941;47870;59004;74953	4.04E-01;4.76E-01;3.75E-01;5.67E-02
CSHL1	-2.86649	0.66569	4	TGTTGGTGAAGGTACTCCTG;TATTCCGACATCCTCCAACA;GGAAGAAGCCTATATCACAA;AGAGCTTATAAACTCCTGGT	-3.96;-3.42;-2.54;-1.55	7737;16955;35782;51807	5.35E-01;7.56E-01;6.73E-01;6.98E-01	25635;41662;60489;69705	4.02E-01;4.31E-01;3.80E-01;1.83E-01
FKBP1B	-1.97545	0.695633	10	CAAGAAGGGCCAAACGTGTG;AAGGCAGACATCAACACCCA;CTTCCATTGGATAAGATCTG;GAGACCATCTCCCCCGGAGA;TGACAGGAATGCTCCAAAAT;GGAAGCCACTGCCACTACGT;ACTGATTTGCGGCTTCACAG;GCCGAGGCGGGCAGATCACG;CAAGGCAGGCAGATCACCTG;ATCCCTGCTAGATGAGCTTG	-4.0;-3.74;-3.67;-3.62;-2.37;-2.31;-2.29;-1.91;-0.53;4.69	7155;11089;12301;13220;38830;39661;40043;46089;65843;77218	4.13E-01;5.72E-01;8.44E-01;1.24E+00;6.09E-01;6.68E-01;8.74E-01;9.35E-01;4.59E-01;1.25E-02	224;11599;31359;37399;37781;38612;64222;65134;66340;70283	1.55E+00;5.60E-01;6.77E-01;6.61E-01;6.10E-01;6.91E-01;7.93E-01;5.46E-01;4.48E-01;4.21E-01
FKBP1C	-2.91635	0.439431	1	GGCAAGCAGGAGGTGATCCG	-2.92	28154	0.439	49310	0.196
LINC02193	-0.533336	0.82455	1	CAAGGCAGGCAGATCACCTG	-0.53	65843	0.0705	11599	0.825
FKBP1A	-2.28719	0.484218	4	GAAACCATCTCCCCAGGAGA;GGCAAGCAGGAGGTGATCCG;ACCGGTGTAGTGCACCACGC;GGGCGCACCTTCCCCAAGCG	-3.05;-2.92;-1.96;-1.22	25145;28154;45413;56771	3.98E-01;4.93E-01;4.77E-01;5.39E-01	20671;32029;49310;52277	3.76E-01;4.52E-01;4.26E-01;6.83E-01
LINC02198	-1.22372	0.689604	2	GCCGAGGCGGGCAGATCACG;CAAGGCAGGCAGATCACCTG	-1.91;-0.53	46089;65843	3.17E-01;1.41E-01	11599;31359	5.94E-01;7.85E-01
LINC02223	-1.52854	0.484514	1	GGAATCTCACTCTGTCACCC	-1.53	52067	0.172	25378	0.485
ERP27	-2.64163	0.572334	4	GGAATTCATTGCTGCCACTG;GGTGACAGAGTACAACCCTG;GGGACATCTGTGAGCCACGT;AGTGCCCATACTCCATAGCA	-3.54;-2.87;-2.72;-1.44	14488;29228;32342;53471	3.96E-01;4.80E-01;7.70E-01;6.43E-01	23971;45118;48246;62960	3.90E-01;4.50E-01;4.38E-01;3.60E-01
LINC02226	-0.533336	0.82455	1	CAAGGCAGGCAGATCACCTG	-0.53	65843	0.0705	11599	0.825
MAP10	0.416723	1.57744	4	AGAAGGATAAGCGTTCTGTG;AAGGCCGAATGTGATAATGT;GTGTAAATCCCCCAGCACAC;TCACAAGTATGCATACAAAG	-4.33;-2.91;4.31;4.59	3620;28267;77089;77190	7.91E-01;4.92E-01;1.75E+00;5.64E-03	252;353;49161;73822	1.89E+00;3.91E+00;4.27E-01;8.31E-02
ERP29	-2.03101	0.506552	4	CCAGGGCGTCGTATACAGGC;CTCCTCTCCGCTCCGCATGG;AGAACCCAGTCCCATACACT;TTCGACACCCAGTACCCCTA	-3.31;-2.95;-1.05;-0.81	19447;27366;59310;62513	3.75E-01;5.04E-01;3.76E-01;3.72E-01	14929;18132;50054;58014	3.92E-01;7.15E-01;4.18E-01;5.02E-01
LGALS9C	-3.59713	1.66736	6	GGTTCCACTGCAGCTGAGAA;ATTTCAGATCACTGTCAATG;CGAGGCAGAAAGGAACATGG;GTACAGCCCTCCCGGAATGG;CAGAGGCACTCTGCACCGTG;AGAAACCACTTACATAGGCA	-4.87;-4.15;-4.07;-3.83;-2.73;-1.94	571;5349;6350;9658;32112;45725	1.37E+00;1.27E+00;2.07E+00;2.56E+00;1.37E+00;1.37E+00	31717;45330;67791;71093;72094;76871	7.54E-01;8.18E-01;1.59E+00;1.15E+00;5.38E-01;1.93E-02
LGALS9B	-2.73727	0.673965	5	ATTTCAGATCACTGTCAATG;GTACAGCCCTCCCGGAATGG;CAGAGGCGCTCTGCACCGTG;AGAAACCACTTACATAGGCA;CGAGGCAGAAAGGAAGATGG	-4.15;-3.83;-2.64;-1.94;-1.13	5349;9658;33827;45725;58200	5.86E-01;9.82E-01;5.78E-01;6.04E-01;6.20E-01	19242;31717;43632;67791;72094	4.02E-01;4.62E-01;4.67E-01;4.37E-01;1.55E-01
UNC50	-1.75592	0.645428	4	TCATTATCGAAAACAGACGA;GGATAAAATGCAAAATGACC;ACAGAGCAGAGACTATGATG;AATCTATGAGTACAACCCAA	-3.05;-1.8;-1.17;-1.0	25151;47835;57572;59975	3.98E-01;4.75E-01;3.75E-01;4.44E-01	17467;19870;29600;52269	3.78E-01;6.61E-01;8.60E-01;6.83E-01
NKAIN4	-1.98877	0.521714	4	ACAGCCAGCACCTGACACCA;CCTCTCCCTAGTACACGCTG;ATAGCGCAGCCGGTACTGGA;TCTCCCGGCATCGCTCCTGG	-4.47;-3.01;-0.48;0.0	2511;26108;66430;70784	9.30E-01;5.23E-01;4.45E-01;1.56E-01	6791;11011;51351;74930	5.75E-01;1.05E+00;4.06E-01;5.73E-02
NKAIN3	-2.41127	0.521681	5	TGTAGGTCTCAGCATTAGAG;TGTAATCGTCCATCATGCCA;CAGACCTCGATACATAATGG;GCCGAGGCGGGCAGATCACG;CATTCAATATCTCTGTACAT	-4.02;-3.04;-2.09;-1.91;-0.99	6933;25382;43285;46089;60225	5.12E-01;4.86E-01;4.69E-01;5.95E-01;5.46E-01	17217;31359;34157;52060;70501	3.91E-01;4.62E-01;5.72E-01;4.75E-01;2.04E-01
NKAIN2	-1.66568	0.693014	6	CTTACTCCTGTTATGTAACG;TGCACGCTTATCTTTATCTG;CTGAGACCGTGATGTAGCGA;GCCGAGGCGGGCAGATCACG;TCCTGCCTCAGCCTCCCGAG;ACTGACGTCACCGTACATCC	-3.27;-3.23;-1.94;-1.91;-0.4;0.76	20277;21128;45686;46089;67218;74026	4.63E-01;5.06E-01;5.48E-01;5.11E-01;4.09E-01;1.18E-01	3416;10224;31359;31756;56294;57141	6.75E-01;8.29E-01;5.53E-01;8.31E-01;4.78E-01;7.92E-01
NKAIN1	-1.55973	0.66354	4	TGGCCCATTCTCCATCCACC;AGCCAGTGACAGAGATGACA;GTACCGGGAGCGGTACTGCA;TGCAGGAAGTTGGCTAGGAT	-4.13;-1.75;-0.58;0.22	5614;48580;65310;72177	6.36E-01;4.84E-01;4.25E-01;1.22E-01	5265;12132;28862;71833	6.57E-01;9.80E-01;8.86E-01;1.31E-01
MAP1A	-1.81269	0.575051	4	ACACAAAGACCGTTGGCCAG;TGGAACAGGACACATACTGG;TGTTGAACATAAGGCTCCGG;CAGGCTGCTTAGGAATAACG	-4.36;-2.84;-0.45;0.39	3335;29860;66751;72876	8.21E-01;4.73E-01;4.51E-01;1.06E-01	4566;10691;47582;74107	7.07E-01;1.07E+00;4.46E-01;7.64E-02
MAP1B	-2.0774	0.643437	5	CATCCGACACTTAGACCGAG;AGACACGTACTCTCATATGG;GCCGAGGCGGGCAGATCACG;CCTTCAGAAAATCCGTTGAG;GGTCACAAAAGTGAATCACG	-3.08;-2.31;-1.91;-1.67;-1.42	24552;39726;46089;49905;53800	4.62E-01;5.17E-01;4.62E-01;5.13E-01;7.91E-01	23642;27537;31359;37716;52889	4.49E-01;4.71E-01;6.29E-01;8.41E-01;8.28E-01
IGSF9B	-3.44418	1.11429	4	CACGGGCACGTAAATCACAG;TGGTGCTGGTCACCCCACCG;GGTATTTCCCACTAGCACCG;GGAATGTGTCGCCACCAACG	-4.24;-3.93;-3.29;-2.32	4448;8192;19776;39565	7.16E-01;1.27E+00;1.30E+00;1.17E+00	37877;57683;69250;72991	5.84E-01;6.64E-01;5.19E-01;1.03E-01
UNC5B	-3.1034	0.814738	4	ATACCCTAGCGATTTCGCCC;CCAGAACGACCACGTCACAC;GATGTATCTACTCATCAACA;AGGGTGGCGTACAGGCGATG	-4.06;-3.62;-2.84;-1.89	6427;13089;29773;46496	5.92E-01;9.27E-01;8.54E-01;8.86E-01	30946;47646;64355;71017	4.61E-01;4.73E-01;4.11E-01;1.50E-01
UNC5C	-2.31062	0.48351	4	AACCCGGCACCACTCAATGG;GGGTACCACAAAGAGCCGGA;AAATGTATGTGACTGTACAC;ATTCTTCCGATACACAAACA	-3.08;-2.99;-2.62;-0.55	24367;26602;34258;65595	3.92E-01;5.16E-01;7.14E-01;2.88E-01	11847;43184;50817;53075	4.30E-01;4.38E-01;4.11E-01;6.56E-01
VGF	-1.2063	0.702115	4	GCATAAAGAGCCGGTAGCCG;CGAGGCGAGCGATCCCTCCG;CAGGCGCGTATGCCCGACAG;CCCCTGTCCAAGGCGTACCA	-3.32;-3.02;-1.25;2.77	19199;25827;56266;76395	3.75E-01;5.28E-01;3.77E-01;2.36E-02	1047;21176;51631;58243	1.28E+00;6.26E-01;4.03E-01;4.95E-01
UNC5A	-2.01808	0.498799	4	GCTGCCTTGAGACATTAATG;ATCTCATAGATCTTCCCTCG;ACCCCAATGTATACATCACG;AGGACTCACTGTGTACACAG	-3.45;-2.14;-1.77;-0.71	16494;42461;48246;63766	3.82E-01;4.34E-01;4.38E-01;3.38E-01	13676;29196;34981;60930	4.04E-01;4.80E-01;6.94E-01;4.17E-01
UNC5D	-2.6332	0.75091	9	ACATTGAGTGAAGCTAGGGG;ACAGTGAGCCGGACATACAG;AGAGCAACCCTATTGCACTC;CTTACAGGCTATGCGCACAG;CCTAGCTTGCCAGCAAAGCA;GACACCAGCACTGATTGCAT;GCCGAGGCGGGCAGATCACG;ACCACACGGTGCCATCCCAG;CAAGGCAGGCAGATCACCTG	-4.4;-3.98;-3.61;-3.04;-2.47;-1.96;-1.91;-1.79;-0.53	2982;7491;13384;25339;36972;45414;46089;47936;65843	5.97E-01;7.82E-01;8.57E-01;7.01E-01;6.32E-01;6.17E-01;8.07E-01;1.13E+00;6.34E-01	11599;29506;31359;32028;40470;52103;64059;69951;74457	4.34E-01;7.40E-01;6.06E-01;5.92E-01;5.93E-01;5.64E-01;5.45E-01;4.14E-01;1.54E-01
MAP1S	-1.5056	0.838541	5	CGTACTCCAGGAATTCGCAC;CTGTCGCTGAGCCCACTGCG;GCCGAGGCGGGCAGATCACG;ATTCCCTACCTCATCATACA;TTCACTGTGCTGGTCAACGG	-2.49;-1.95;-1.91;-1.44;0.26	36558;45552;46089;53506;72369	7.37E-01;6.17E-01;4.62E-01;4.53E-01;1.47E-01	5073;23936;31359;31890;40882	6.02E-01;5.02E-01;6.29E-01;1.07E+00;1.39E+00
CCP110	-2.50857	0.68274	5	CCAGAAAAAAGATACCCTAA;CAGTTAACATCCGATGAGAG;CTGCAGTAGAGTGTTCCGTA;GGAATCTCACTCTGTCACCC;AGAAATAAGAGTTTCTTGTG	-3.86;-3.83;-3.54;-1.53;0.22	9175;9613;14630;52067;72139	4.46E-01;9.85E-01;1.35E+00;4.75E-01;1.54E-01	5303;25378;62823;67828;68280	5.89E-01;4.86E-01;7.21E-01;4.37E-01;2.73E-01
NO_CURRENT_76	-1.71206	0.566609	4	CATTAGTCTGATACCTGTGC;CATTGCACGCCACAGCATTG;CATTGCACTCGTTGCCAACG;CATTAGCAGCCCAGCGCCCA	-4.21;-1.99;-1.79;1.14	4749;44968;47908;74826	6.93E-01;4.49E-01;4.42E-01;5.97E-02	2616;29534;32474;72698	9.14E-01;4.76E-01;7.66E-01;1.10E-01
NO_CURRENT_77	-2.78988	0.709533	4	CATTGTTGAGCGGGCGCGCT;CCAATCTTGAACGTCATGTT;CATTGTATGAACGCAATAGC;CCAAAAAGATGAATATCTCG	-4.54;-2.82;-1.9;-1.89	2024;30120;46251;46433	1.02E+00;4.70E-01;4.64E-01;8.89E-01	31009;31191;47322;75418	4.62E-01;4.59E-01;4.50E-01;4.60E-02
NO_CURRENT_74	-1.61754	0.746105	4	CATGAGCGCATTGAATAATA;CATAGGTCCCTAGCAACTCC;CATCATAAATGTACAACGGG;CATCTGTAGGGTTGCAAGCC	-2.55;-1.8;-1.13;-0.99	35596;47774;58192;60121	5.37E-01;4.75E-01;3.75E-01;4.40E-01	17321;19250;29668;41846	3.78E-01;6.79E-01;8.58E-01;1.07E+00
NO_CURRENT_75	-2.60974	0.82175	4	CATGGCATAAGTATAAGACA;CATGATAGATCAGTCTTCCC;CATTAAACCTTGCCCCACAA;CATGGCCTACGGTGTCTTTG	-4.56;-4.18;-1.88;0.18	1883;5029;46562;71956	1.04E+00;1.66E+00;4.60E-01;1.28E-01	5486;30880;72415;75559	6.43E-01;4.62E-01;6.73E-01;4.27E-02
NO_CURRENT_72	-1.50209	0.60704	4	CAGGAGTCGCCGATACGCGT;CAGGGTTGCGCAGAGGACTC;CAGGTTTGCACGCATAGCTA;CAGGCTGCGCTTCGCAAGCT	-4.41;-2.38;-2.16;2.94	2969;38484;42185;76504	8.65E-01;4.26E-01;5.31E-01;2.11E-02	938;35257;38958;74473	1.33E+00;4.33E-01;5.97E-01;6.79E-02
NO_CURRENT_73	0.140078	1.52499	4	CAGTGTCCGAGCGATATTTT;CATAAGGTTAACTGCGTGGA;CAGTAGCGATCGAATGTCAA;CAGTCGTTTCTATGGGATCT	-2.08;-1.28;1.08;2.85	43462;55826;74717;76447	7.22E-01;6.15E-01;8.98E-01;2.24E-02	995;2725;21616;33980	1.31E+00;2.16E+00;1.20E+00;1.43E+00
NO_CURRENT_70	-1.50399	0.597974	4	CAGACGGTTGGTAAGGACGC;CAGACCTAGCTCCGCTCCCA;CAGACCCAGTAAAACCACCA;CAGAGACAATGACATGTAGA	-3.95;-3.29;-1.37;2.59	7913;19923;54495;76293	5.29E-01;6.59E-01;3.84E-01;2.59E-02	1149;22947;57519;69529	1.25E+00;5.84E-01;3.75E-01;1.87E-01
NO_CURRENT_71	-0.924999	0.8829	4	CAGCCTATTTTGCTACCTAC;CAGCGGTGCTATTTGGTCTT;CAGCGCCGAAACTCTTTCCG;CAGAGCCTTGCGCAATTTTG	-2.56;-2.19;-1.28;2.33	35360;41715;55820;76104	5.33E-01;4.31E-01;3.79E-01;3.03E-02	1338;21622;35727;42082	1.18E+00;6.14E-01;6.75E-01;1.06E+00
ANKRD19P	-2.48066	0.407153	2	ACGCCCGCGACAGAAAAGAC;GGAATCTCACTCTGTCACCC	-3.43;-1.53	16765;52067	4.69E-01;3.45E-01	25378;60678	3.56E-01;2.12E-01
LOC101927837	-0.799701	0.859941	4	ACGCAGCGACGTGAGGAGCG;AGAAGAGGATCTGTTGCAGG;CCTGCAGGTACTAGACCTGC;GCCACGCGAGGAGCCCAGAT	-3.0;-2.12;-1.23;3.14	26298;42894;56722;76598	4.08E-01;4.36E-01;3.76E-01;1.90E-02	844;20720;34548;51127	1.37E+00;6.37E-01;7.06E-01;7.21E-01
NO_CURRENT_78	-0.536309	1.27866	4	CCAATGATAAGCCCGAACGG;CCACTGGTAAAGGCTAGACT;CCACGATGCCACCTCATCCC;CCACACCTGTCTAGCATGAC	-2.06;-1.24;0.12;1.03	43820;56551;71638;74612	7.32E-01;6.33E-01;6.25E-01;6.47E-02	2830;5804;20891;33622	8.84E-01;1.54E+00;1.24E+00;1.45E+00
NO_CURRENT_79	-1.86319	0.691963	4	CCAGGCTGAAGTTCGTACCT;CCAGCAATACCCCGGTATGG;CCAGAGCCTTGGTTTATATC;CCAGAAAGCCTCTCCATTAC	-2.31;-2.3;-1.63;-1.22	39721;39950;50595;56806	6.25E-01;4.27E-01;4.13E-01;5.38E-01	20636;26847;37492;37721	3.76E-01;5.12E-01;6.31E-01;1.25E+00
LOC105372295	-2.13155	0.557706	4	TGGACTCCCACTGATCCCGT;GGTTGTAGGAAACACGACTT;CCTCGGAACTCACGGCATGA;GCGGTCGCACGGCGTTGACG	-4.42;-3.49;-2.04;1.42	2882;15652;44133;75224	8.77E-01;8.07E-01;4.97E-01;5.05E-02	2218;33309;61791;74560	9.79E-01;4.43E-01;3.87E-01;6.59E-02
LOC105372299	-0.533336	0.82455	1	CAAGGCAGGCAGATCACCTG	-0.53	65843	0.0705	11599	0.825
LOC100420353	-2.03224	0.36782	1	ACCTTGGACATAAAAGCTCT	-2.03	44241	0.243	33201	0.368
RPL18A	-1.90998	0.693555	4	CTACGAGAGTACAAGGTAGT;CTGCGCTATGACTCCCGGAG;GAAGTTCTTCACCCGCAGGG;CTTTCCACAGACCGAGACAT	-2.56;-1.9;-1.66;-1.53	35370;46349;50097;52063	5.33E-01;4.60E-01;4.18E-01;6.90E-01	25380;27354;31102;42054	4.00E-01;5.04E-01;8.10E-01;1.06E+00
VDAC1P1	-2.75502	0.390068	1	AAGCGGGAGCACATTAACCT	-2.76	31543	0.39	45919	0.227
CLEC18A	-1.94702	0.709076	8	TCATGCGACAAGGATTCCTG;TCGGGGTTGGGGTTCCACAG;TGGCCACACCTCTGCCCAGG;GACAAAGGACACCAAGCCCG;CACCTGCACCCACTACACGC;GTGGAAGGGAAAATGCACCT;GAGCAGGCTCCGATGGCCGG;GGTCAGCCTATGGTTTGCAG	-3.14;-3.05;-2.53;-2.42;-1.86;-1.35;-1.03;-0.19	23169;25230;35915;37940;46871;54761;59586;69042	7.02E-01;5.54E-01;6.06E-01;5.64E-01;5.53E-01;5.22E-01;5.31E-01;3.99E-01	8400;17856;22681;30571;39493;41510;52191;54287	4.11E-01;5.10E-01;6.04E-01;6.42E-01;6.43E-01;8.45E-01;7.83E-01;1.23E+00
CEND1	-2.36038	0.573583	4	CTTCGAGGGCTTGGTCAAGG;GGTGCCCCAGGTCACCACCG;GGGTTGCATCGGGACTGCTG;GGCACCTGCCAAGAAGACCT	-4.48;-2.04;-1.94;-0.97	2405;44088;45622;60425	9.47E-01;4.43E-01;4.74E-01;4.31E-01	17017;31820;33343;75037	3.79E-01;4.54E-01;7.40E-01;5.48E-02
CLEC18B	-2.25271	0.676877	9	TTGTTGAAGTGGTCAGCCTG;TCATGCGACAAGGATTCCTG;TCGGGGTTGGGATTCCACAG;TGGCCACACCTCTGCCCAGG;GCACCACCTGGGCAGAGGTG;CACCTGCACCCACTACACGC;GTGTAGCAGGGCTTACCCGG;GTGGAAGGGAAAATGCACCT;GAGCAGGCTCCGATGGCCGG	-3.5;-3.14;-3.04;-2.53;-1.97;-1.86;-1.86;-1.35;-1.03	15461;23169;25524;35915;45151;46871;46990;54761;59586	5.19E-01;5.73E-01;5.64E-01;5.88E-01;5.91E-01;5.95E-01;7.73E-01;7.83E-01;1.02E+00	17856;22681;30441;30571;32291;41510;51934;54287;61963	5.94E-01;5.64E-01;5.93E-01;6.05E-01;7.36E-01;7.01E-01;6.23E-01;8.04E-01;8.72E-01
BORCS7	-2.00764	0.992269	4	AGGTCAGGCAGCTCGAAACA;GGTTCGGTCAGTCCGTGAAG;GAACGCCAGAGTCTCAAGCG;CGTAATCGCGCTCACCAAGC	-5.16;-3.98;-1.4;2.51	120;7425;54084;76239	2.21E+00;1.35E+00;3.86E-01;2.72E-02	1203;23358;70015;77322	1.23E+00;5.75E-01;5.47E-01;2.67E-03
BORCS6	-0.894461	1.04485	4	AGAACGAGCCCGGCCCTCAA;CAAAGTGGGTAAGGTCGCCG;AGGGAGTGCCGAGTCCGGCG;GAAGAGACCGAGAACGTTGG	-2.83;-2.82;0.64;1.43	29998;30201;73694;75240	4.48E-01;4.69E-01;7.78E-01;5.01E-02	2202;3748;47257;47429	9.82E-01;1.90E+00;4.51E-01;8.52E-01
BORCS5	-2.47409	0.678598	6	ATCGTTGCTGACGTTCCGTG;TTTGGTTAAACGAATCAAAG;AGGAGTTCAGATCGTTGGGT;GCCGAGGCGGGCAGATCACG;GCAGGTGATCTTGATATCGG;CAAGGCAGGCAGATCACCTG	-4.66;-4.08;-2.44;-1.91;-1.22;-0.53	1385;6270;37461;46089;56814;65843	1.01E+00;1.15E+00;5.07E-01;5.11E-01;4.69E-01;4.23E-01	11599;20628;31359;39981;71176;76057	3.99E-01;5.11E-01;5.53E-01;6.03E-01;4.97E-01;4.70E-02
LOC105372741	-1.91411	0.392609	1	GCCGAGGCGGGCAGATCACG	-1.91	46089	0.225	31359	0.393
TARDBPP2	-1.12422	0.73392	2	GACATATGATAGATGGACGA;CAAGGCAGGCAGATCACCTG	-1.72;-0.53	49125;65843	3.34E-01;1.41E-01	11599;28317	5.94E-01;8.74E-01
LOC105372745	-1.91411	0.392609	1	GCCGAGGCGGGCAGATCACG	-1.91	46089	0.225	31359	0.393
BORCS8	-3.4635	1.12374	4	CCAGGGAGCCATCTACACTG;CCTGGCCAACGAGCCATCCG;CACTGAGAGCGTCTACGTCC;AGCCGGAGATGCAGCTCAAG	-4.69;-3.63;-2.88;-2.65	1208;12949;28912;33596	1.23E+00;9.34E-01;8.85E-01;1.45E+00	43825;48516;64504;76234	7.32E-01;4.83E-01;4.13E-01;2.73E-02
SDR42E1	-2.84248	0.714565	4	CCTCTTATGGTATGTCAGGG;TCCGAGAGTAGTGATCAGGG;GTGCTGGTGTAAACTAACCT;CCTGCACCAAGTTATCCACG	-3.38;-2.96;-2.53;-2.5	17770;27100;35972;36531	3.77E-01;5.08E-01;6.68E-01;1.31E+00	40927;41460;50357;59684	6.54E-01;4.30E-01;4.15E-01;4.52E-01
LINC01750	-1.60938	0.701361	4	AAGGTCAGCATGTGCCCACA;CCAGATTCCCACCCTCAGGG;GCTCCGTGCCTCGTCGACCC;ATCCAGGATTCCGGGCACCG	-2.64;-2.05;-1.24;-0.5	33848;44006;56427;66170	5.06E-01;4.42E-01;3.77E-01;2.73E-01	11272;21015;33436;43594	4.40E-01;6.30E-01;7.38E-01;9.98E-01
ALOX12B	-2.55265	0.835022	4	CCAGTTACCGCCCTCCGGTG;CAAGACGTGGGTACGCTATG;TGCACATAGTTGCAGTACCA;GTTCCCCGTCACAGACGACA	-4.7;-4.0;-0.81;-0.7	1167;7152;62597;63942	1.24E+00;1.38E+00;3.93E-01;3.33E-01	13500;14845;70280;76276	4.06E-01;8.41E-01;5.58E-01;2.63E-02
LINC01754	-0.533336	0.82455	1	CAAGGCAGGCAGATCACCTG	-0.53	65843	0.0705	11599	0.825
EPB41L1	-2.23512	0.565185	5	GGGTCTGGTTAGGGGCGAAG;ATCCATCCCAGCAGGACACG;GTTCCCAGTCTCGATCCCGG;GCTCCAAGTTCCGGTACAGT;CAAGGCAGGCAGATCACCTG	-2.96;-2.86;-2.84;-1.99;-0.53	27246;29384;29776;44896;65843	5.08E-01;4.63E-01;6.67E-01;6.25E-01;3.52E-01	11599;32534;47643;48031;50197	4.07E-01;4.63E-01;4.62E-01;5.51E-01;9.41E-01
PPCDC	-1.45498	0.716662	4	CAGCGACGCTGATGAATGGG;ATGTTCTTGTGGGTGTCACG;GCAGGTCAATGTGCAGAACT;GTGACAGCTGGAAGTAGCAG	-3.11;-1.76;-0.96;0.01	23815;48398;60642;70902	3.89E-01;4.82E-01;3.80E-01;1.53E-01	6540;16800;29044;53609	5.86E-01;7.62E-01;8.80E-01;6.39E-01
EPB41L3	-1.55428	0.641475	4	TGGGCCATCAGAGTCCAAGG;GAGATGACATCGTGTCCGGA;AAGGTTAGGAATTTCTTGGG;AGCCAAAATACCAACCTCAG	-3.15;-2.73;-1.28;0.94	22983;31996;55915;74446	3.84E-01;4.53E-01;3.78E-01;6.85E-02	2996;21527;45446;54473	8.62E-01;6.17E-01;4.76E-01;6.11E-01
EPB41L2	-2.11068	0.564381	5	AAAGTCATATACCTTAGTAG;TAAGCAAGGCAACAGACCTG;AAGACTATGGAAAGTGTGCG;CTAAGAGGGTCACTTTACAC;CAAGGCAGGCAGATCACCTG	-3.24;-3.14;-3.01;-0.63;-0.53	20924;23144;25985;64807;65843	4.17E-01;5.12E-01;7.78E-01;3.98E-01;3.52E-01	11599;12635;51479;54298;56516	4.07E-01;8.07E-01;4.81E-01;4.42E-01;6.84E-01
EPB41L5	-1.64012	0.707249	5	GGTTGATATGCATGTGGTCA;TTGGCAGCTTATAATCTGCA;CTAAGTCCATCATCACGTGT;CAAGGCAGGCAGATCACCTG;ACCTTCGTGAGGAGCTAACC	-3.54;-2.75;-0.96;-0.53;-0.41	14497;31576;60578;65843;67114	3.89E-01;4.62E-01;6.44E-01;4.07E-01;3.11E-01	10328;11599;16864;45848;62926	4.25E-01;8.61E-01;1.20E+00;6.01E-01;4.51E-01
ACSS3	-2.09489	0.586585	5	CCGGGACCACTAAAGCCCTG;GGTGTGATTAGGCCCACTGG;GCCGAGGCGGGCAGATCACG;ACATGGTATACATCGCCTGT;CTTGTACCAGCTGATCTGCT	-3.12;-2.68;-1.91;-1.65;-1.12	23686;33048;46089;50221;58351	4.50E-01;4.65E-01;4.62E-01;5.07E-01;6.15E-01	19091;27221;31359;44392;53739	4.01E-01;4.72E-01;6.29E-01;6.38E-01;7.93E-01
ACSS2	-1.59665	0.762327	6	CAGTGGCCCATAGGTGACGT;CAGGAAGGGGAGTCAACATG;GGAACCAAGGGATTGACTTG;GGAATCTCACTCTGTCACCC;CAAGGCAGGCAGATCACCTG;GCATTGTGGTCAAGCACCTG	-3.13;-2.42;-2.35;-1.53;-0.53;0.37	23434;37956;39105;52067;65843;72790	5.24E-01;6.13E-01;5.05E-01;4.83E-01;3.99E-01;1.61E-01	4652;11599;25378;38337;39499;54008	5.78E-01;7.55E-01;6.70E-01;6.39E-01;9.94E-01;9.39E-01
ACSS1	-3.3178	0.974095	4	GATCAAAGCAACGCTCTCGG;ACCAGCATTGGGATAAACTG;CAGACAACAAGGTCCACATG;GCTGAAATACGGTGATGCCT	-4.2;-3.36;-3.14;-2.57	4800;18398;23158;35065	6.89E-01;7.06E-01;1.13E+00;1.38E+00	42358;54276;59058;72642	6.92E-01;5.79E-01;3.76E-01;1.11E-01
KIDINS220	-2.72299	0.739038	4	TGTTGAACTGTCGTACATGG;ATCTCGAGCCACAAGAACTG;TACACGCCAAGGTATTACCC;CCACGACTATTAAGGAACAC	-4.46;-3.93;-1.97;-0.54	2537;8223;45216;65793	9.26E-01;1.27E+00;4.80E-01;2.83E-01	11649;32226;69226;74905	4.33E-01;4.51E-01;5.18E-01;5.78E-02
LOC107984686	-0.533336	0.82455	1	CAAGGCAGGCAGATCACCTG	-0.53	65843	0.0705	11599	0.825
PUDP	-0.577636	1.32503	4	TGTCTTCATATCGAACGACG;AGAAACTCATCATCCACCTG;CTATGACAAGAAATACAGCT;GGGTAAGAAGGCATTAGAGG	-1.62;-1.57;0.37;0.51	50730;51454;72762;73278	9.69E-01;5.25E-01;6.98E-01;9.60E-02	4164;4680;25988;26712	7.39E-01;1.71E+00;9.98E-01;1.85E+00
PCOLCE2	-1.25465	0.748663	4	ATAGGTGCTACTTACGCAGG;ACACACAAGTGACTCCTGCA;GGGGTCGCGTTACCTCTCTG;GAAGGGGATCAGTATTGTGG	-3.35;-1.6;-1.3;1.24	18502;50899;55492;74982	3.75E-01;5.16E-01;3.80E-01;5.61E-02	2460;21950;26543;58917	9.38E-01;6.06E-01;9.75E-01;4.75E-01
DFNA5	-2.61532	0.621171	4	GGAGAAGTGTGGTGGCATCG;GTATAACTCAATGACACCGT;ATGAAGACTGGCTCTCTACG;TCTTCTGTGTCAAAACGCAC	-4.36;-2.54;-1.87;-1.69	3327;35674;46772;49596	8.22E-01;4.31E-01;4.57E-01;7.74E-01	27846;30670;41768;74115	4.23E-01;4.64E-01;5.39E-01;7.63E-02
MAGEH1	-1.01791	1.10467	4	GGGAAGTTAGGAATGCAGCC;GGAAGACCCGAGCACTCCAG;ACAGAAGAGTTTGTGCGCAG;CTGCGGCTCTCGCATTACGG	-1.79;-1.01;-0.8;-0.48	47978;59954;62702;66480	8.65E-01;7.37E-01;3.93E-01;2.65E-01	10962;14740;17488;29464	4.46E-01;8.46E-01;1.45E+00;1.68E+00
WNT3	-1.42837	0.850532	5	GGATGCGCGCGAGAACAGGC;TTTGGGCCCGTCCTCGACAA;ACCAAATTGGGTAGCCAGCG;CAAGGCAGGCAGATCACCTG;GCATGATCTCGATGTAATTG	-2.64;-2.2;-1.57;-0.53;-0.19	33773;41512;51411;65843;69076	6.57E-01;5.42E-01;4.81E-01;4.07E-01;2.48E-01	8366;11599;26031;35914;43684	4.66E-01;8.61E-01;7.76E-01;9.07E-01;1.24E+00
WNT2	-1.29948	0.814969	4	CCGAGGTCAACTCTTCATGG;AAACGGGCGATTATCTCTGG;CCTTTGCATCCACAAATGCG;TACATGAGCCGCTCACCCCG	-3.51;-1.7;-0.04;0.05	15151;49441;70177;71194	3.90E-01;4.95E-01;5.54E-01;1.46E-01	6248;7265;28001;62299	6.01E-01;1.36E+00;9.18E-01;3.78E-01
WNT1	-2.39812	0.499833	4	ATCTCGGAGAATACGGTCTG;GTCTGATACGCCAAAATCCG;TTCGGCAAGATCGTCAACCG;CCTGCACGTGTGACTACCGG	-3.61;-2.79;-1.61;-1.58	13327;30843;50808;51229	4.08E-01;4.63E-01;4.11E-01;7.18E-01	26213;26634;46578;64105	4.07E-01;5.15E-01;4.60E-01;3.28E-01
LRRN4	-1.92333	0.509633	4	CAGTTCTCTTTGCATCCGTG;AGCGGCACGTTCCTTGAACG;TGGAGCGGTTGAAGCAAGGT;GGCGACAGAAGCAAGTGCTG	-3.88;-2.17;-1.03;-0.61	8837;42050;59630;64944	4.98E-01;4.32E-01;3.77E-01;3.06E-01	12498;17812;35392;68607	4.19E-01;7.25E-01;6.83E-01;2.10E-01
LRRN3	-2.61537	0.646397	4	AGCTCTCAGGAGCTATAAGA;AAGGTTTACTGGAAAGTCTG;CCTATTAATAGAATACGAAG;AGAAATACCAGATAACGCCT	-3.98;-3.91;-2.31;-0.27	7453;8464;39748;68451	5.46E-01;1.25E+00;5.80E-01;2.14E-01	8991;37680;68978;69981	4.94E-01;4.27E-01;5.10E-01;1.76E-01
WNT6	-1.70617	0.632255	4	GCAACTGCACAACAACGAGG;CGAGGCTCTTTATGGACGCG;GTGGTGGCAGAGCTAGCTCG;GCTGGTAGGGTCCATAACCA	-4.74;-1.38;-1.26;0.55	1014;54373;56237;73420	1.30E+00;5.81E-01;3.77E-01;9.26E-02	4022;21205;23069;76428	7.52E-01;6.25E-01;1.13E+00;2.29E-02
LRRN1	-2.21763	0.437916	4	GAGTTCAGGCAAGTTATCCA;GCACTTGTGTGTCACTAGAG;TAGACAGTAATCAGTCATCT;CTTCCCAAATCGTTTAAACG	-3.78;-2.93;-1.21;-0.95	10517;27821;56930;60704	4.55E-01;4.98E-01;3.76E-01;4.23E-01	16738;20512;49611;66905	3.80E-01;6.43E-01;4.23E-01;2.54E-01
WNT4	-3.32976	0.98395	4	CATCCTGACACACATGCGGG;GTCATGGACTCGGTGCGCCG;TGGCCAAGCTGTCGTCGGTG;ATCCACAAACGACTGTGAGA	-4.1;-3.53;-3.12;-2.56	5974;14740;23524;35260	6.15E-01;8.46E-01;1.11E+00;1.37E+00	42182;53909;62710;71473	6.87E-01;5.71E-01;3.94E-01;1.39E-01
RNF175	-3.42985	1.28347	4	GCCTCTACTATGGAGTAATG;GATGACTCACATTGTAGGAT;AGGATGTACAAGATGCACCG;TGGCGGTTTCTGTCTATGTG	-4.75;-3.99;-3.67;-1.31	949;7304;12312;55449	1.33E+00;1.36E+00;1.87E+00;5.80E-01	21993;65130;70138;76493	3.80E-01;9.70E-01;5.52E-01;2.14E-02
RNF170	-1.23395	0.773947	5	AGAAAACCAGGAGCTAGTAA;TTCCCGGTGGAGACCAACTG;TGGGTTGCCCTGAGAATCTC;CAAGGCAGGCAGATCACCTG;GCGATATGGTTCATGGCTTG	-3.61;-2.38;-1.49;-0.53;1.85	13293;38525;52670;65843;75666	3.94E-01;5.03E-01;4.92E-01;4.07E-01;5.04E-02	1776;11599;24772;38917;64149	9.81E-01;8.61E-01;8.20E-01;8.00E-01;4.09E-01
FTH1P4	-2.96438	0.456739	1	TCTTCAAAGCCACATCATCG	-2.96	27054	0.457	50389	0.187
PCNA	-1.92906	0.545069	4	TGCTTCAAATACTAGCGCCA;ATACGTGCAAATTCACCAGA;TGGCCAGGTTGCGGTCGCAG;GCTGGAGCTAATATCCCAGC	-3.02;-2.69;-1.81;-0.19	25772;32818;47658;69114	4.03E-01;4.46E-01;4.45E-01;1.98E-01	8328;29795;44632;51656	5.15E-01;4.73E-01;4.89E-01;7.03E-01
ZBTB7A	-1.7439	0.675045	4	ATCATCGGACGCCCCAAAGG;GCCGTAGTGGCCGTTCTGCG;ACCGTCAGCACAGCCAACGT;GAGTCGCGGGCCGACGACAA	-2.57;-2.56;-1.02;-0.82	35053;35439;59706;62408	5.27E-01;4.32E-01;3.77E-01;3.75E-01	15034;17736;42017;42389	3.91E-01;7.28E-01;5.34E-01;1.05E+00
ZBTB7C	-2.95525	1.09737	5	GAGGTGTGGAAAGAAGTCCG;AAAGTCGATCTCATAGACGT;CAAGAATCGGAAGATCAAGG;GTATGGGTCCTCATGTGCCG;CAAGGCAGGCAGATCACCTG	-4.41;-4.41;-3.9;-1.51;-0.53	2895;2933;8536;52293;65843	7.95E-01;1.89E+00;1.97E+00;4.72E-01;3.52E-01	11599;25149;68913;74509;74546	4.07E-01;4.88E-01;1.07E+00;7.90E-01;8.27E-02
ZBTB7B	-2.58069	0.674835	4	TGTATAGGCAAATTCAAGGA;TCCGGATGGTGAGGTCACAT;CAGAGCTACGAACCCTATGA;AGCAAACCACCTAGTCCCTG	-4.23;-3.95;-1.68;-0.46	4511;7818;49711;66640	7.11E-01;1.31E+00;4.22E-01;2.61E-01	10802;27731;69624;72931	4.49E-01;4.99E-01;5.32E-01;1.04E-01
PCNP	-2.30698	0.533827	5	TCAGCCATATCCATCAAACT;TGTAGGCTTTGTTGGGAGGT;ACCTATGGCAAATCCAAACT;GGGGTTGTGTTCACCTCCGG;CAAGGCAGGCAGATCACCTG	-3.11;-3.03;-2.51;-2.35;-0.53	23822;25645;36221;39068;65843	4.52E-01;4.84E-01;5.38E-01;7.95E-01;3.52E-01	11599;38363;41233;51782;53600	4.07E-01;5.01E-01;4.81E-01;4.80E-01;7.99E-01
PCNT	-0.344635	1.24421	5	ACAGCGTGGGATGTTCACAA;GCCGAGGCGGGCAGATCACG;GTGATGCCAATACAGCCACG;CAGACTTTGAGGAACAACTG;ATCTAGTGTAGACTGCAACG	-2.36;-1.91;-1.43;-0.01;4.0	38856;46089;53553;70429;76994	8.11E-01;6.29E-01;5.02E-01;5.09E-01;1.26E-02	448;7013;23889;31359;38586	1.55E+00;1.21E+00;8.53E-01;1.10E+00;1.51E+00
LOC105373506	-4.71831	1.84916	1	AACACATCCAGTTAAAACTG	-4.72	1096	1.85	76346	0.00618
UTY	-0.779005	1.15836	6	AGGATTCATAGAGAGTACCT;TGACTGTCAGCATCCCCCTG;TCAGAACTTCTGTTGAACTG;GGAATCTCACTCTGTCACCC;CAAGGCAGGCAGATCACCTG;AGTAGAAGTAGACCAAACCA	-2.25;-2.05;-1.6;-1.53;-0.53;3.3	40645;43991;50908;52067;65843;76674	1.12E+00;7.73E-01;6.41E-01;4.83E-01;3.99E-01;2.59E-02	768;11599;25378;26534;33451;36797	1.25E+00;7.55E-01;6.70E-01;1.05E+00;1.29E+00;1.94E+00
PACRG	-1.77879	0.588721	5	CACGACATGCTGGAACACGG;TTTCGAAAATTCTATGAGCG;GAGTGACACAGATGACCTGT;CAAGGCAGGCAGATCACCTG;CAAAGCCCATCAAAAAACAG	-3.78;-2.78;-2.08;-0.53;0.28	10398;31091;43484;65843;72422	4.24E-01;4.61E-01;4.68E-01;4.07E-01;1.46E-01	5020;11599;33958;46368;67034	6.06E-01;8.61E-01;5.75E-01;5.89E-01;3.13E-01
PCAT7	-1.52854	0.484514	1	GGAATCTCACTCTGTCACCC	-1.53	52067	0.172	25378	0.485
DNPH1	-3.38062	1.0786	4	TTCTGCGGGAGCATTCGCGG;AGGACAGGACGCTGTACGAG;TCATAGCCTACACCCAAGGA;GGGCCGTGGCCTTTAACAAG	-3.79;-3.74;-3.3;-2.69	10311;11042;19496;32916	4.60E-01;1.05E+00;1.32E+00;1.49E+00	44545;57933;66392;67141	7.54E-01;6.71E-01;4.44E-01;2.48E-01
ILF3	-3.50245	1.16344	4	TACGCCCATGAAACGCCCAA;AGCACATGACCAGAACCCTG;TGCTGGTTCCAACAAAAAGG;CGTCCCTCCGACACGCCAAG	-4.24;-3.58;-3.39;-2.8	4457;13895;17669;30529	7.15E-01;8.86E-01;1.44E+00;1.62E+00	46935;59756;63560;72985	8.29E-01;7.30E-01;4.02E-01;1.03E-01
ILF2	-3.10996	1.11624	5	ACTAGTAGGTCAAGGATCCA;TGATGAAACTTCCTTCAGTG;TTCCACGACTTTGTTCCCCA;AATTGAAGAAGTTCGACAGG;CAAGGCAGGCAGATCACCTG	-4.14;-3.69;-3.63;-3.55;-0.53	5490;11813;12998;14365;65843	5.78E-01;8.49E-01;1.48E+00;2.32E+00;3.52E-01	11599;63091;64420;65627;71957	4.07E-01;1.37E+00;7.89E-01;4.05E-01;1.59E-01
BOK	-1.9199	0.598148	4	GGTGGTGTCCCTGTATGCGG;GCCCAGCGTCTACCGCAACG;AGGAACGCATCGGTCACCAC;GCCGGGAGTACGTGCACGCG	-2.77;-2.63;-2.25;-0.03	31236;34074;40736;70250	4.65E-01;4.39E-01;5.59E-01;1.69E-01	7192;36706;43368;46200	5.57E-01;4.28E-01;5.10E-01;8.97E-01
LOC101928688	-2.24942	0.464136	2	AAACAATGTATAGGTCATAG;GAGTATATTAGCCAAGCTAC	-2.31;-2.19	39695;41730	3.01E-01;5.37E-01	35713;37728	3.04E-01;6.25E-01
BOC	-1.56186	0.71407	4	CAGACTCATATGAACTGGTG;CGTCAAACAAGAGTGGCTGG;AATCCAGGTCACGTACACTG;ACTGGTACCGTCCCACAGTG	-2.57;-2.09;-1.57;-0.02	35132;43355;51449;70344	5.29E-01;4.38E-01;4.05E-01;1.67E-01	7098;25993;34087;42290	5.61E-01;5.25E-01;7.19E-01;1.05E+00
FAM24B-CUZD1	-1.799	0.665579	8	TTGTGTGTGGCACATACAAG;AATGGGACATAATTCTACAG;AGCTGCACAGTCAGTCTAGG;GTGGTGGGCCAAGAACAGCC;TATAAGCAAATCCTACCTAG;CATCGCTGGTGGTATCCTGG;AGAGCACGACAACTATCAGC;CAACCCAGACAAGGTGTGGT	-3.53;-3.43;-2.56;-2.28;-2.16;-1.12;-1.06;1.75	14831;16787;35352;40181;42213;58355;59179;75579	4.61E-01;5.17E-01;5.97E-01;5.66E-01;5.96E-01;5.07E-01;5.42E-01;8.46E-02	1863;18263;19087;35224;37277;42108;60675;62621	7.90E-01;5.08E-01;6.91E-01;5.77E-01;6.95E-01;8.22E-01;5.03E-01;7.38E-01
DENND2C	-1.95415	0.545663	5	TCTATACCTCACAAATACTG;GGGAATTGTTGTATGACCTG;GGAATCTCACTCTGTCACCC;AAATATCTGAATGTCCTACG;CAAAGGAAAGCGACTCCCTG	-3.56;-3.22;-1.53;-0.92;-0.54	14192;21255;52067;61189;65786	3.90E-01;5.41E-01;4.86E-01;3.88E-01;3.54E-01	11656;16253;25378;56162;63239	4.07E-01;6.63E-01;7.98E-01;4.20E-01;4.40E-01
DENND2A	-1.60315	0.819264	7	GCATGTTTGAACGTTCTCCG;TAAAGGAGCAGTGAACGTCG;GCCGAGGCGGGCAGATCACG;GCTGACACGCACTTTATCGG;GGAATCTCACTCTGTCACCC;CAAGGCAGGCAGATCACCTG;GCCATTTATGAGGTCCGGAG	-3.9;-1.91;-1.91;-1.87;-1.53;-0.53;0.44	8517;46075;46089;46791;52067;65843;73036	4.17E-01;1.09E+00;7.03E-01;5.39E-01;5.09E-01;4.02E-01;1.78E-01	4406;11599;25378;30651;31359;31367;68923	5.52E-01;6.79E-01;5.99E-01;7.22E-01;1.09E+00;1.74E+00;3.54E-01
DENND2D	-3.29177	1.01574	4	ACCACCCCAGGACAATTCAG;ATCCACATTGGTCAGAACGA;TTTGTACTCCAACCATGAAG;AGCATGGATGCACTGAGACA	-4.43;-4.02;-3.01;-1.72	2805;7005;26093;49121	8.87E-01;1.39E+00;9.94E-01;7.91E-01	28321;51331;70441;74638	4.28E-01;5.23E-01;5.65E-01;6.40E-02
GAGE1	-1.41332	1.42674	20	GGAACCAGCAACTCAACGTC;GTACAGCCTCCTGAAATGAT;GAAGCTGATAGCCAGGAACA;AACAGGGTCACCCACAGACT;GGATCCTGCAGCTGCTCAGG;GGATCCTGACGTTGAGTTGC;TGAAGCTGATAGCCAGGAAC;ATAGGCCCAATCATTTCAGG;GGGTCCATCTCCTGCCCATC;CTGAAATGATTGGGCCTATG;GAGTGTGAAGATGGTCCTGA;ATGGATTGCCTACCTTCTTC;GTTTAAGCACTCACCCGCAT;ACCAGCAACACCTGAAGAAG;TTTCAGTGTGAAATATGAGT;CCTATTATTGGCCTAGACCA;TCACTGAACTGCTCGGGCTG;GGAGGCTGTACATAGCGCCT;GAAGCCTGAAGCTGATAGCC;…	-4.56;-3.98;-3.51;-3.1;-2.68;-2.25;-1.97;-1.66;-1.39;-1.39;-1.38;-0.83;-0.76;-0.62;-0.46;-0.43;-0.22;0.49;0.89;1.53	1887;7436;15241;24055;33118;40656;45157;50037;54269;54270;54297;62324;63229;64928;66666;66932;68864;73186;74351;75340	5.16E-01;5.46E-01;6.79E-01;9.30E-01;1.29E+00;1.62E+00;1.69E+00;1.83E+00;1.93E+00;1.52E+00;1.19E+00;1.71E+00;1.41E+00;1.23E+00;1.07E+00;7.98E-01;6.77E-01;6.83E-01;4.34E-01;2.39E-01	2102;3091;4256;8578;10510;10776;12514;14213;15118;23145;23172;23173;27405;32285;36787;44324;53404;62201;70006;75551	4.92E-01;8.37E-01;1.14E+00;9.53E-01;1.10E+00;1.46E+00;1.65E+00;1.85E+00;2.20E+00;1.52E+00;1.93E+00;2.42E+00;2.30E+00;2.14E+00;2.06E+00;1.67E+00;1.21E+00;8.46E-01;5.50E-01;2.15E-01
PPT1	-1.79738	0.579294	4	TGTTGCAATCCCTTAAGCAT;GAGATCAGATTGATCATGGG;AAGGATCCTAAATTGCAGCA;GCCAGTATTCGGCTTGCACG	-3.23;-2.04;-1.91;-0.0	21158;44076;46093;70451	3.77E-01;4.43E-01;4.67E-01;1.64E-01	6991;31349;33366;56302	5.66E-01;4.58E-01;7.40E-01;5.54E-01
RABAC1	-1.44409	0.8149	4	AGTACTCCACGTTGCGTACG;TCCAGGGCCGGATGGTCGCG;GGGAATCAGCTTCGGCAGCA;CTCACACACAGTACAGGATG	-2.6;-1.55;-0.82;-0.8	34484;51744;62386;62723	5.17E-01;5.30E-01;3.91E-01;3.66E-01	14719;15056;25704;42958	3.94E-01;8.32E-01;1.01E+00;1.02E+00
INPP4B	-1.54465	0.906869	7	TCATCATAGTCTGAATGATG;GCCGAGGCGGGCAGATCACG;GGCTGTACATTCACATACCA;GGAATCTCACTCTGTCACCC;TGACACCAGTCAAAAACAGT;TTTCGCAGATTGTCCCAATG;TCCTGCCTCAGCCTCCCGAG	-3.58;-1.91;-1.86;-1.53;-0.86;-0.67;-0.4	13921;46089;46910;52067;61914;64309;67218	4.17E-01;1.09E+00;7.26E-01;5.99E-01;5.59E-01;4.10E-01;4.30E-01	10224;13133;15528;25378;30532;31359;63521	4.03E-01;6.23E-01;9.38E-01;9.11E-01;1.13E+00;1.74E+00;6.02E-01
INPP4A	-2.54685	0.584439	6	TGTCGATGAGAGCTTGACGG;AAGTGAGTTACTACGCAGAG;GTTCGTGAAGCTCCTACTAG;AGAGTGCATCATTCAGCGTG;GCCGAGGCGGGCAGATCACG;CAAGGCAGGCAGATCACCTG	-3.95;-3.38;-3.07;-2.43;-1.91;-0.53	7835;17790;24758;37757;46089;65843	4.48E-01;5.55E-01;6.87E-01;6.53E-01;7.41E-01;4.23E-01	11599;31359;39685;52684;59634;69610	3.99E-01;5.11E-01;5.06E-01;4.84E-01;4.28E-01;2.78E-01
SAFB	-2.07977	0.561695	6	CCACGGAAAGATGATCTCCG;TGTGGCTCGAGATCGCTCTG;TAGCTCTCTACTATCCGACA;AAACGGAATGTGGACTCGAG;TCCTGCCTCAGCCTCCCGAG;GAGAATCGCTTGAATCCGGG	-3.64;-3.49;-3.34;-2.05;-0.4;0.44	12842;15597;18620;43963;67218;73043	3.96E-01;6.06E-01;9.14E-01;5.36E-01;4.09E-01;1.52E-01	4399;10224;33479;58805;61844;64600	5.94E-01;8.29E-01;5.29E-01;5.39E-01;4.06E-01;4.72E-01
TRNP1	-1.90431	0.563327	5	AGGGCGCTAGCGGGATCGCG;CCAGCTCCGACACCAGGCGC;TGGAGCTGGCCGAAGCACGG;GCTCGGCCGCCAAGAAAACG;GAGAATCGCTTGAATCCGGG	-4.16;-2.25;-1.78;-1.77;0.44	5246;40642;48125;48236;73043	5.92E-01;5.29E-01;4.64E-01;5.47E-01;1.27E-01	4399;29206;29317;36800;72196	6.48E-01;4.64E-01;6.79E-01;8.74E-01;1.52E-01
UBOX5-AS1	-1.69277	0.971237	9	ACTTAGGCCGCAAAGTACCT;GGGACAAGGCATGATCTCCA;AAGGCCAGTACATTGCAGCT;CGACAGTGTGCCACTCTAGG;GCTTCCATCGCGCCAAAAGG;AACCGCAGTGAAGCCACATG;GCGGTATCCCTTGTATCAAG;CAAGGCAGGCAGATCACCTG;ATCTCTCTGAATTTGTCATG	-5.01;-4.36;-1.88;-1.14;-1.12;-0.95;-0.77;-0.53;0.54	276;3314;46575;58044;58218;60754;63118;65843;73375	1.51E+00;1.31E+00;1.14E+00;1.41E+00;9.40E-01;7.08E-01;5.31E-01;4.34E-01;2.11E-01	4067;11599;14324;16688;19224;19398;30867;74128;77166	5.13E-01;5.86E-01;8.07E-01;1.09E+00;1.42E+00;2.06E+00;1.68E+00;5.66E-01;1.39E-02
OR7E157P	-1.55229	0.554858	2	CATCTTGGGAACCATGGCCG;GATCCTCTGAGAGTCCCAGG	-2.84;-0.27	29806;68449	3.25E-01;1.07E-01	8993;47636	6.88E-01;4.22E-01
PPP1R26	-2.8817	0.676351	4	ACGTTCATCTTCGCTAACCG;TTCAGACAGTGATGATTCCG;GGAACGGTCCTCGTGCCGGG;CCAGAGGGTCCAACTCCGAG	-4.06;-3.45;-2.57;-1.45	6429;16394;35182;53338	5.92E-01;7.77E-01;6.89E-01;6.48E-01	24104;42254;61033;71018	3.91E-01;4.33E-01;3.82E-01;1.50E-01
PPP1R27	-2.38696	0.486852	4	TTCTTGGACCACATCCGGCA;TGACATTCACCAGCGAGATG;AGAGAGCACGGCTTCATGCA;TGGGGCGCTTCATCCGGACT	-3.81;-2.79;-1.58;-1.37	9962;30907;51263;54481	4.68E-01;4.62E-01;4.06E-01;6.11E-01	22961;26179;46557;67480	3.84E-01;5.22E-01;4.60E-01;2.39E-01
PPP1R21	-1.04073	1.3422	7	GAAGCATTCCTTCCTCAAGA;GCCGAGGCGGGCAGATCACG;TGAAGATGCGAGATATTGCT;CAGAACTGTAGTTTGTCCGA;CAAGGCAGGCAGATCACCTG;TCCTGCCTCAGCCTCCCGAG;CTAGCTCTAAGTGAACCACG	-2.23;-1.91;-1.32;-1.17;-0.53;-0.4;0.28	41118;46089;55171;57569;65843;67218;72438	1.40E+00;1.09E+00;1.06E+00;7.43E-01;6.79E-01;4.03E-01;2.03E-01	5004;10224;11599;19873;22271;31359;36324	5.19E-01;7.44E-01;1.21E+00;1.21E+00;1.68E+00;1.74E+00;2.30E+00
NGLY1	-2.97195	0.818458	4	TCAGCAATCGATTCCCAAGG;CAGCACACAAGGAACCGTCA;CATCCTATTTCATAAAGGAG;TGCTCTTCAGGAGAAAGCGT	-3.26;-3.08;-2.93;-2.62	20518;24507;27887;34122	3.76E-01;5.52E-01;9.23E-01;1.42E+00	43308;49576;52910;56904	7.18E-01;4.97E-01;3.93E-01;5.35E-01
LMX1A	-0.578526	1.15413	5	AGATGGTTCTCGGACGTTTG;TGTTGTGGCTACAGGCAGAG;CTTGTCCCGGTAGAAGCAGG;GAGAATCGCTTGAATCCGGG;ATCCTCCAAGCCCTGCAGGA	-3.08;-2.42;-0.79;0.44;2.95	24468;37989;62850;73043;76508	4.61E-01;4.97E-01;7.22E-01;6.48E-01;2.63E-02	934;4399;14592;39453;52974	1.24E+00;1.57E+00;1.36E+00;7.82E-01;8.25E-01
ZCCHC24	-1.84301	0.538097	4	AGGCTCGCAAGCCCAGCAAG;CAACAAAGGACACTACATCA;TTGAGATAGCTGGAGTGCAG;ATGTTGTTGAGGGAGCCATA	-4.53;-2.0;-1.84;1.0	2067;44756;47238;74559	1.01E+00;4.47E-01;4.51E-01;6.59E-02	2883;30204;32686;75375	8.76E-01;4.69E-01;7.60E-01;4.70E-02
LMX1B	-1.88912	0.683431	5	CACCGGAGTCGGACTCGTCG;CGCCCGCATCACGAACTCGG;TGTGAACGGCAGCTACGCAA;CTCGTCGAAGCCTTGCCGAA;GAGAATCGCTTGAATCCGGG	-2.78;-2.6;-2.37;-2.14;0.44	31097;34510;38769;42484;73043	5.89E-01;4.71E-01;5.05E-01;6.89E-01;1.27E-01	4399;34945;38688;42952;46361	6.48E-01;4.73E-01;5.06E-01;6.76E-01;1.11E+00
OR6V1	-2.13104	0.51116	4	GGAGAGGACAGTGGGTACCA;ATCAGAGTGCCATAGCGCAG;GGTTACCAAGATCTCCAGCA;GTGAAGGTAATGACTTTGTG	-4.41;-3.32;-1.67;0.88	2902;19276;49794;74311	8.74E-01;6.78E-01;4.21E-01;7.17E-02	3131;27648;58166;74538	8.45E-01;5.00E-01;3.75E-01;6.64E-02
MRGPRF	-3.20958	0.978394	4	AGGCACATGGACATCTTCCT;CCAGGACCCGGCACACGCTG;GCTGAAGAGGTAGCCCACAT;ATGTAGTTCATGACGGCCGG	-4.3;-3.7;-3.45;-1.39	3848;11770;16361;54274	7.68E-01;1.00E+00;1.53E+00;6.18E-01	23168;61095;65673;73593	3.85E-01;7.79E-01;4.31E-01;8.85E-02
ABCE1	-2.99996	0.799321	4	CAATTGATAAGGCGCCAAAG;CCAAAACTTCACCTGGACGA;AGTTGTCCTGTAGTTCGAAT;TTTCAGATATATCATTGTGG	-3.68;-3.57;-3.2;-1.55	12136;14016;21821;51745	4.25E-01;8.80E-01;1.19E+00;7.00E-01	25700;55608;63414;65284	4.02E-01;6.09E-01;4.00E-01;2.97E-01
KCP	-2.90942	0.720864	4	AGGGGCAGCTTTATGAGGAG;TGGCACTTACCCCTGCAATG;GGCACCGGCAGATTCGGCAG;GAATAAGGACCTGCAGACGA	-3.48;-3.19;-2.9;-2.07	15745;22068;28535;43659	3.86E-01;6.04E-01;8.98E-01;9.96E-01	33792;48924;55393;61682	5.05E-01;4.88E-01;3.80E-01;3.95E-01
LOC107984160	-1.11705	0.887448	3	TGGAGTGATGAAAGACATCA;CACATATTCTAAAGCGTGAG;CAAGGCAGGCAGATCACCTG	-2.13;-0.69;-0.53	42688;64058;65843	4.77E-01;4.50E-01;2.11E-01	11599;13384;34754	4.88E-01;1.13E+00;1.04E+00
CNR1	-2.11345	0.530333	4	ACAGGTACATATCCATTCAC;GATGAACAGAAGCAGTACGC;GTTTGAACAGAAACACGTTG;ATGAGGAGAACATCCAGTGT	-2.95;-2.82;-2.39;-0.29	27304;30253;38318;68244	4.17E-01;4.69E-01;6.11E-01;2.20E-01	9198;39120;47217;50111	4.88E-01;4.26E-01;4.51E-01;7.56E-01
GBX2	-1.98617	0.510925	4	CGGCGGTAACTTCGACAAGG;GAGCGATGTGGACTACAGCT;AGGGAAAGACGAGTCAAAGG;CCCGGCCATTTCGTCTACAC	-4.58;-2.01;-1.41;0.05	1793;44618;53881;71191	1.06E+00;4.46E-01;3.87E-01;1.46E-01	6251;23561;32824;75651	6.01E-01;5.70E-01;7.56E-01;4.06E-02
GBX1	-2.22353	0.482272	4	GGCCCGTAGAAAGCGTCGGG;CGGCCCGATTAGGGAGTCGA;GCCCCGCTAGCCTCTTTCGC;GGAAAAGTCTCTGAGAAGTG	-4.09;-3.47;-1.55;0.21	6098;15940;51815;72116	6.09E-01;7.95E-01;4.02E-01;1.24E-01	5326;25627;61502;71333	6.53E-01;5.31E-01;3.85E-01;1.43E-01
CNR2	-1.91571	0.63851	6	AAGGATTACATGATCCTGAG;GCTGCATGCAAAGACCACAC;GACAGCAAGTCCATCCCATG;GGAATCTCACTCTGTCACCC;GCAGAGGTATCGGTCAATGG;CAAGGCAGGCAGATCACCTG	-3.15;-2.99;-2.72;-1.53;-0.57;-0.53	22828;26472;32329;52067;65444;65843	5.11E-01;4.83E-01;5.41E-01;4.83E-01;3.97E-01;4.23E-01	11599;11998;25378;45104;50988;54633	3.99E-01;7.36E-01;6.70E-01;5.21E-01;5.96E-01;9.09E-01
GNL3L	-2.02866	0.462073	4	TGCCGTCAGAAAGTGCTCAG;GTGCGCACCCACATTCGTGT;GCACGTGGACGCAGTTACGC;TTATTACAAGGAGTTCCGTA	-4.34;-2.76;-1.83;0.81	3539;31553;47424;74157	7.99E-01;4.56E-01;4.48E-01;7.53E-02	3285;30018;45915;73905	8.27E-01;4.71E-01;4.69E-01;8.12E-02
LOC107985786	0.878545	1.39259	1	GAAAAAGATCTCGATACTTG	0.88	74306	0.0179	3136	1.39
OTULIN	-0.35136	1.0951	4	ATTGCTTATACATGAAAGAG;TGAACTATTCACAAATGAGG;AAGAGTCCCTTACTCTGCTG;ACCACGGACTCGCCGTATGG	-3.2;-1.24;-0.37;3.41	21766;56451;67508;76731	3.79E-01;6.30E-01;4.69E-01;1.60E-02	711;9934;20991;55700	1.45E+00;1.12E+00;1.24E+00;5.72E-01
TGS1	-2.29295	0.560809	5	TTGGTTTATTAACCCATGTG;AAAGACAGACCACATGCCAG;ATCTGTATCACAGCTTTGCG;GCAGAATCACATGACAGCAA;CAAGGCAGGCAGATCACCTG	-3.01;-2.9;-2.66;-2.37;-0.53	26158;28504;33413;38808;65843	4.88E-01;4.66E-01;5.86E-01;8.03E-01;3.52E-01	11599;38617;44020;48920;51307	4.07E-01;5.04E-01;4.66E-01;5.33E-01;8.94E-01
ANKS1B	-2.02469	0.70681	12	CAGGAGTGGATCTCGGAATG;TATGTCCATTTAAGGCTGCG;GGTGTTAAACATGCCCATTG;ATAAAGTCGCTCTCAAACAT;CTGCAGCGGCAACTGTACAA;GCCGAGGCGGGCAGATCACG;GGAATCTCACTCTGTCACCC;ACAGAGTATTTAGAAGGCGT;ACTCTACGGACGGCTTAGAG;AAGATAAAAAGAGCGGCCCG;CAAGGCAGGCAGATCACCTG;TCCTGCCTCAGCCTCCCGAG	-4.05;-3.72;-3.24;-3.19;-2.05;-1.91;-1.53;-1.43;-1.27;-0.98;-0.53;-0.4	6615;11399;20950;22007;43994;46089;52067;53641;56049;60301;65843;67218	4.16E-01;5.36E-01;5.94E-01;6.53E-01;8.81E-01;7.43E-01;7.31E-01;6.31E-01;5.97E-01;5.77E-01;5.20E-01;7.38E-01	10224;11599;17141;21393;23801;25378;31359;33448;55435;56471;66030;70815	4.77E-01;5.34E-01;6.00E-01;6.63E-01;7.80E-01;9.76E-01;9.77E-01;1.20E+00;6.04E-01;6.87E-01;5.14E-01;4.66E-01
ANKS1A	-1.58905	0.745287	5	GTCCACTCCAAGACCACAGG;GTCAACATAAAAGATAACCA;GCTGCTGAAACTGTAACCAA;GAACGATGCGCTGACCAACG;CCACAGAGGACGCTACCATG	-2.76;-2.39;-2.08;-1.12;0.4	31510;38345;43485;58335;72906	5.99E-01;5.01E-01;4.68E-01;4.01E-01;1.31E-01	4536;19107;33944;39097;45932	6.38E-01;5.85E-01;5.76E-01;7.94E-01;1.13E+00
LOC107984788	-0.533336	0.82455	1	CAAGGCAGGCAGATCACCTG	-0.53	65843	0.0705	11599	0.825
BMT2	-1.68313	0.681235	5	TCTTGCAGCAAATCCATCGC;ACTATGCATACCTCTACAGC;GATCTGGCGAGAACACTGTG;CAAGGCAGGCAGATCACCTG;AGGGCGAAGGTCGTATTGAA	-3.55;-3.47;-1.04;-0.53;0.17	14435;16048;59532;65843;71870	3.89E-01;6.70E-01;6.14E-01;4.07E-01;1.62E-01	5572;11599;17910;61411;63007	5.74E-01;8.61E-01;1.14E+00;3.88E-01;4.48E-01
LOC107984782	-1.91411	0.392609	1	GCCGAGGCGGGCAGATCACG	-1.91	46089	0.225	31359	0.393
ADAM10	-2.30878	0.480298	5	TTCCATCAATAACAGACCCA;TTTCAACCTACGAATGAAGA;GGAAATGGAATGGTAGAACA;CCCATAAATACGGTCCTCAG;TCCTGCCTCAGCCTCCCGAG	-3.92;-3.48;-2.3;-1.44;-0.4	8268;15780;39825;53515;67218	4.69E-01;6.79E-01;4.94E-01;4.53E-01;3.07E-01	10224;23927;37617;61663;69178	4.26E-01;5.02E-01;5.18E-01;3.88E-01;2.45E-01
ADAM11	-2.24388	0.444409	4	GCTCCACGTATTGCGAGGAG;GCTCATGGTCTACCGACGGG;GTTCGAGCAGATGCGACAGT;TGGGAACTTGACTTACATCG	-3.53;-2.59;-1.64;-1.21	14703;34722;50365;56957	3.94E-01;4.35E-01;4.15E-01;5.34E-01	20485;27077;42720;62757	3.76E-01;5.08E-01;5.21E-01;3.65E-01
ADAM12	-2.18463	0.563229	4	AAGCAATGGTACTTGCCCGG;TGCTGAATATTCGACTACAA;GGTGATCCTTATGGCAACTG;ACTGAACATTCGGATCGTGT	-2.84;-2.37;-2.27;-1.26	29839;38757;40304;56190	4.46E-01;4.26E-01;5.68E-01;5.57E-01	21252;37138;38667;47619	3.77E-01;4.27E-01;6.03E-01;8.45E-01
ADAM15	-2.58341	0.551162	4	AGTGCCACTCGTACATTCAG;TGGATTCGCGAAATAATGGG;CTGTTGTCAAAATTGCCAGG;CTCCAGACAGCTAATACTCG	-4.25;-3.18;-2.35;-0.55	4371;22271;39001;65611	7.22E-01;5.99E-01;5.96E-01;2.88E-01	11831;38441;55171;73071	4.30E-01;4.26E-01;3.81E-01;1.01E-01
ADAM17	-0.588371	1.25185	5	TGGTGAAAAGCACTACAACA;AATCAGAATCAACACAGATG;TCCTGCCTCAGCCTCCCGAG;ACAAAATTTCAAGGTCGTGG;CATCGCTTCTACAGATACAT	-3.26;-2.21;-0.4;1.05;1.87	20542;41409;67218;74674;75693	4.13E-01;5.41E-01;9.43E-01;8.11E-01;4.96E-02	1749;2768;10224;36045;56920	9.87E-01;1.94E+00;1.76E+00;9.02E-01;6.69E-01
ADAM18	-2.3484	0.474552	4	AGTAAGTATGCTATGTCATG;AAAATCCCATTACCACACAC;TATAACAGTCAATTTGAACT;AGTGCCTGCTATTGACAACT	-3.21;-3.17;-2.04;-0.97	21493;22544;44146;60436	3.78E-01;5.93E-01;4.97E-01;4.31E-01	17006;33295;54897;55966	3.79E-01;4.43E-01;3.82E-01;5.64E-01
ADAM19	-1.82823	0.582158	5	TGCCCAGAGATGCGAAGTGT;CCTCTAAATAATCAGCCACG;ATGCCTCTAATTGTACCCTG;CAAGGCAGGCAGATCACCTG;GTCACGCTCAGCACTTGCCG	-3.68;-3.37;-1.67;-0.53;0.1	12184;18119;49904;65843;71506	4.02E-01;6.09E-01;4.71E-01;4.07E-01;1.73E-01	5936;11599;27538;59338;65259	5.55E-01;8.61E-01;7.29E-01;3.95E-01;3.72E-01
MEPE	-3.20605	0.973136	4	AATGTTGTGTTGAATACGAT;ATAACATGCAACATATAATG;GAGTACTCTCAGCTTCACTT;GAGGGCAGCAACGATATCAT	-3.44;-3.44;-3.24;-2.7	16566;16627;20973;32543	3.81E-01;7.68E-01;1.24E+00;1.51E+00	44880;56486;60817;60873	7.64E-01;6.31E-01;3.81E-01;4.18E-01
HAGH	-2.61562	0.627496	4	GGACGCGGCGAGAAAGCACG;TTTGCGGAAGAACCTGACCG;GAAGTTCTATGAAGGGACTG;TCGGGACTGAAGGTGTACGG	-3.76;-3.63;-2.95;-0.12	10735;12990;27343;69661	4.51E-01;9.32E-01;9.43E-01;1.84E-01	7781;50122;64452;66718	5.34E-01;5.05E-01;4.13E-01;2.59E-01
GLYAT	-0.0929209	1.18219	4	GTGAGCATGGGTAACATCCA;ACTGTCTTTCACATAAACCA;GGAAACTTACCTGCTCCTGA;TGATGAGTTCTGGTGATCCA	-3.01;-2.69;-1.38;6.71	26098;32856;54336;77420	4.06E-01;4.46E-01;3.85E-01;4.71E-04	22;23106;44589;51336	2.94E+00;5.80E-01;4.90E-01;7.14E-01
OPALIN	-0.997082	1.10337	4	GCCCGCCGCTAATCCAAGAG;TCAATTTCTGAAATTTCACA;TGACAATCCCAAGATATCTG;GGCGGGCATACCATTGCTGG	-2.7;-0.6;-0.4;-0.29	32717;65156;67203;68187	4.87E-01;9.71E-01;4.61E-01;2.21E-01	9255;10239;12286;44745	4.86E-01;1.10E+00;1.87E+00;9.53E-01
NEPRO	-2.99994	0.768226	4	ACTCCACCACTGGCTGACTG;TTTGTTTGGATTGCTTCAAG;GACAGTGCAGAACCCCGGCG;AGTCATCAGAATTTGATGTG	-3.62;-3.51;-2.92;-1.94	13115;15174;28074;45614	4.11E-01;8.27E-01;9.15E-01;9.20E-01	31828;49391;62272;64318	4.74E-01;4.95E-01;3.90E-01;3.23E-01
U2AF1L4	-2.43925	0.585715	4	CGTGGGCAACGTCTATGTCA;TGGCTGAACTCAGTAACCGC;GTAAAAAGAGCAGTTAACCC;TGTCGGCTTGTTGTGAAGCC	-2.95;-2.51;-2.42;-1.87	27264;36284;37851;46805	4.17E-01;4.29E-01;6.22E-01;8.75E-01	30638;39606;41176;50158	4.57E-01;4.26E-01;5.50E-01;7.55E-01
U2AF1L5	-2.12247	0.522619	4	CTCACCCCATCTCATACTGA;AAACAAACCTGGCTAAACGT;TGATTGACTTGAATAACCGT;GGTGGGGAACGTGTACGTCA	-2.99;-2.84;-1.52;-1.15	26618;29780;52220;57908	4.10E-01;4.74E-01;3.99E-01;5.05E-01	19534;25222;47647;50826	3.75E-01;5.39E-01;4.46E-01;7.32E-01
NDEL1	-2.65948	0.598996	4	ACAGGAAGTAACTAGAAAGT;CTTTGAACAAAGGCTAAACC;AGGTTAAAGGATGAAGCAAG;AAGATGATTTAAGTCAGACT	-3.7;-3.45;-1.89;-1.59	11663;16350;46511;51056	4.33E-01;7.79E-01;4.61E-01;7.24E-01	26386;30931;61084;65783	4.08E-01;4.62E-01;3.82E-01;2.83E-01
SHANK3	-2.06345	0.526564	5	AGAACGACCTCACCTCGATG;GCCCGCTGCCGTATCCCGAG;GGGATGGCAGATCCGCGCCG;CAAGGCAGGCAGATCACCTG;TGGCGTTCAAACAATGACTG	-3.76;-2.94;-2.9;-0.53;-0.18	10765;27522;28510;65843;69170	4.18E-01;4.71E-01;7.01E-01;4.07E-01;2.45E-01	8272;11599;48911;49928;66685	4.69E-01;8.61E-01;4.66E-01;5.13E-01;3.25E-01
SHANK2	-1.40179	1.11724	9	TATCACACAGCCATCGTCGG;ACTCTGAAGACCTCTACAGT;GCCGAGGCGGGCAGATCACG;ACAGCAGACAGGCACACAGT;GGAATCTCACTCTGTCACCC;CCGCCGGAAACCATCCGATG;CAAGGCAGGCAGATCACCTG;TCCTGCCTCAGCCTCCCGAG;GCAAGCCGGACTAAGGACCG	-3.41;-2.07;-1.91;-1.58;-1.53;-1.44;-0.53;-0.4;0.27	17128;43590;46089;51303;52067;53394;65843;67218;72376	5.70E-01;1.46E+00;1.11E+00;9.73E-01;7.00E-01;5.68E-01;5.86E-01;4.17E-01;2.64E-01	5066;10224;11599;24048;25378;26139;31359;33844;60302	4.65E-01;6.33E-01;9.72E-01;7.39E-01;1.01E+00;1.44E+00;1.64E+00;2.17E+00;9.78E-01
SHANK1	-1.57911	0.670807	4	TACCATGACTCGGATTCGGG;TGTCGGCACCTCGATACAGG;GTGAACATGATCCGCCAAGG;ACTCTTCCGGCATTATACCG	-3.75;-1.67;-0.53;-0.37	10978;49884;65872;67504	4.46E-01;5.01E-01;4.34E-01;2.39E-01	9938;11570;27558;66452	4.69E-01;1.01E+00;9.35E-01;2.66E-01
PLAC8L1	-1.82033	0.594499	4	ATCACAGCAATTGTCCAGAC;GTGGTGAAGCAGCCTGTTCG;ATGTCACACTCAAGACACAT;AAGGTGGACCCAGGTAACAA	-2.85;-2.64;-1.75;-0.03	29469;33753;48594;70257	4.41E-01;4.40E-01;4.34E-01;1.69E-01	7185;28848;43689;47973	5.57E-01;4.84E-01;5.04E-01;8.32E-01
PCSK9	-0.288594	1.50916	4	GAGGTTGCCTGGCACCTACG;GTGGTGACTTACCAGCCACG;CCCTGCCCTCGATTTCCCGG;TCCTCGATGTAGTCGACATG	-2.62;-0.3;0.64;1.12	34227;68128;73718;74793	5.13E-01;1.17E+00;7.80E-01;6.04E-02	2649;3724;9314;43209	9.09E-01;1.90E+00;2.21E+00;1.01E+00
LINC02210-CRHR1	-1.25305	1.36262	9	GCACTCGGAGTAATTCACGC;GTCGTAGTACAGCTTCCCAA;TAGCTGGACCACGAACCAGG;GTACTGAATGGTCTCAGACG;GAGCCGCAGAAAGAGGACAA;TACACCGACTACATCTACCA;TGCTCACCTACTCCACTGAC;CAAGGCAGGCAGATCACCTG;GGACACCATAGAAAAAGGCA	-2.71;-1.94;-1.84;-1.53;-1.06;-0.87;-0.69;-0.53;-0.11	32457;45756;47336;52001;59108;61768;64085;65843;69730	1.31E+00;1.62E+00;1.18E+00;1.01E+00;9.89E-01;7.46E-01;5.46E-01;4.34E-01;4.10E-01	7712;11599;13357;15674;18334;25441;30106;31686;44966	4.12E-01;5.86E-01;8.59E-01;1.17E+00;1.50E+00;1.50E+00;1.74E+00;2.38E+00;2.12E+00
PCSK2	-2.49089	0.56063	4	CTTGTGGAGTTGCATAAAGG;TGCTCACCACACCGGCCTCG;GGATTTGACCGAAAAAAGCG;AACCAGTCATCTGTGTACCG	-3.04;-2.97;-2.3;-1.65	25436;26852;39913;50159	4.00E-01;5.12E-01;5.76E-01;7.55E-01	27283;37540;50588;51988	4.17E-01;4.27E-01;4.13E-01;6.92E-01
PCSK1	-1.65628	0.753325	4	GGCCAGCGGGTCATACTCAG;GAGCACTTCTCAGCGTACCA;TCGTTTGTGGGATCATATCG;TACCATTGCTGATTCCACAT	-2.15;-2.08;-1.58;-0.82	42352;43521;51315;62441	6.91E-01;4.39E-01;4.06E-01;3.74E-01	15001;26127;33921;35090	3.91E-01;5.23E-01;7.24E-01;1.38E+00
PCSK6	-0.237048	1.34966	5	GCCATCGCAGCACATGTGTG;GGAATCTCACTCTGTCACCC;ACAGCGCTGACGCAGATCCG;CAAGAACAGTCGCTGCCGGT;GCGCACGGGTACCTCAACTT	-2.96;-1.53;-1.32;1.68;2.95	27148;52067;55175;75516;76505	5.06E-01;7.99E-01;5.24E-01;9.49E-01;2.64E-02	937;1926;22267;25378;50294	1.24E+00;2.24E+00;9.18E-01;1.41E+00;9.37E-01
PCSK7	-2.67391	0.681965	5	TGACGTAGGATGCTAAGTAA;GCGATGTGCAGGAGAGATCG;TGGGTGACTACCTATGGTGA;TCAGGCTGCCTTACAACATG;TCCTGCCTCAGCCTCCCGAG	-3.64;-3.46;-3.42;-2.45;-0.4	12740;16268;17006;37388;67218	3.97E-01;6.62E-01;1.19E+00;8.52E-01;3.07E-01	10224;40054;60423;61165;64697	4.26E-01;5.21E-01;6.39E-01;3.88E-01;3.90E-01
PCSK4	-2.78619	0.769862	4	TCACCTTGGTCACACCACGC;GTCTCACGTAGTTGGCCCAG;GCACCCGTGATGCAGGTCCG;GCTTTCAACGCCCGAATCGG	-4.08;-4.04;-1.6;-1.42	6142;6658;51015;53784	6.06E-01;1.43E+00;4.09E-01;6.33E-01	23658;26427;70786;71291	3.88E-01;5.18E-01;5.81E-01;1.44E-01
PCSK5	-3.2956	1.17178	4	ATATTCATGTCAGACTGGCA;TATTGTCAGGACTTCCCGTG;GGAAGAGTGTTCATCCACGC;GCAGTGCGAATTGTTTGCAG	-4.57;-3.91;-3.71;-0.99	1809;8434;11615;60165	1.06E+00;1.25E+00;1.94E+00;4.39E-01	17277;65816;69008;75633	3.78E-01;1.01E+00;5.11E-01;4.10E-02
FAM171A1	-2.02405	0.571275	6	CCGGGAGCTAAATTCCTGGG;GGCGACGCCATCAGTCCCCG;ACAATGCCTATGTCGCGGCG;GGAATCTCACTCTGTCACCC;GCTGGCGGCCGTGAGAAACG;CAAGGCAGGCAGATCACCTG	-3.96;-2.68;-2.0;-1.53;-1.45;-0.53	7793;33030;44734;52067;53366;65843	4.49E-01;5.30E-01;5.37E-01;4.83E-01;5.38E-01;4.23E-01	11599;24076;25378;32708;44412;69647	3.99E-01;4.86E-01;6.70E-01;7.98E-01;7.99E-01;2.76E-01
MAEA	-2.76703	2.12086	4	GCGTTGCGGCTACTACAACA;CGCACGCCCTACCTTGTACG;CCAGGAGTACCCGACCCTCA;ATAAGAGACTGGACGCTGTG	-4.92;-4.69;-4.5;3.03	452;1230;2306;76559	1.64E+00;2.83E+00;3.99E+00;1.99E-02	883;75135;76212;76990	1.36E+00;2.30E+00;1.22E+00;1.01E-02
TC2N	-1.6025	0.730294	5	GGGTTATACACATCATAGCT;GCCGAGGCGGGCAGATCACG;ACAGAAACAGAAGTCAATGG;AGTTATCTTACATTCAACCC;AGTGAAGAGACTGTATGGAT	-3.2;-1.91;-1.54;-1.08;-0.28	21698;46089;51924;58893;68350	4.25E-01;6.29E-01;4.85E-01;3.97E-01;2.71E-01	9092;18549;25518;31359;55725	4.48E-01;5.98E-01;7.94E-01;1.10E+00;7.15E-01
PLTP	-1.77681	0.584381	4	ATCACCATTCCGGACCTGCG;CTCTGTCTCCAGAATGCACG;AAATCACCAATGCCTCCTTG;AAGCCACAGGATCCTTCATG	-3.57;-2.87;-0.51;-0.16	14024;29202;66111;69374	4.00E-01;4.80E-01;4.39E-01;1.91E-01	8068;11331;48215;63424	5.23E-01;1.03E+00;4.39E-01;3.47E-01
DPYSL4	-2.84068	0.731129	4	CCTGGGATCTTACCTCCTCG;CAGACACTCACAGATCATGG;TGCACGTGGACATCACCCGA;GATGGTCTGGGAGAAATGTG	-4.26;-3.76;-2.85;-0.5	4251;10849;29579;66235	7.32E-01;1.06E+00;8.61E-01;2.72E-01	11207;47860;66604;73190	4.41E-01;4.76E-01;4.48E-01;9.81E-02
LOC105376107	-2.58377	0.723991	9	TCTTACACACCCGACAGACG;TCTTCAAAGCATTTAGAGTG;ATAGACCCCAGAACGAGGCA;AGGAGTCGGAAAGGAACTTG;TGAGGGGCGTTCTAGGAGAA;CTGATGGCCAGAATGTCGTG;AGAAATCTTCAAATCGAAAG;GCCGAGGCGGGCAGATCACG;CAAGGCAGGCAGATCACCTG	-3.98;-3.42;-3.41;-2.9;-2.79;-2.36;-1.95;-1.91;-0.53	7526;17045;17268;28402;30759;38883;45575;46089;65843	4.13E-01;5.14E-01;6.88E-01;6.34E-01;7.84E-01;7.80E-01;8.27E-01;1.24E+00;6.34E-01	11599;31359;31853;38576;46708;49046;60167;60402;69906	4.34E-01;8.07E-01;6.14E-01;6.07E-01;6.03E-01;5.73E-01;5.14E-01;5.67E-01;4.00E-01
LOC105376103	-0.533336	0.82455	1	CAAGGCAGGCAGATCACCTG	-0.53	65843	0.0705	11599	0.825
SETBP1	-2.80261	0.805846	6	TGTGAGCGAGTCCCACAGTG;TTCCGCAGATAGTGCCCAAG;ACCCGTTGCTCTATCTTCGT;CAGGAGGTGTGTCTAAGCCG;GGAATCTCACTCTGTCACCC;CAAGGCAGGCAGATCACCTG	-4.55;-3.59;-3.42;-3.2;-1.53;-0.53	1988;13795;16956;21820;52067;65843	8.69E-01;6.63E-01;1.00E+00;1.31E+00;5.68E-01;4.23E-01	11599;25378;55607;60502;63636;75454	3.99E-01;4.83E-01;7.80E-01;5.73E-01;3.97E-01;6.77E-02
SAMSN1	-2.33781	0.580348	5	ATTCTAAACTAGGCACATGA;TCCATGGATAGTCTCTACAG;GGAATCTCACTCTGTCACCC;AATCCGTATGCACTCTGGCA;GGAATGTTGAACAATAAAGT	-4.44;-3.24;-1.53;-1.38;-1.1	2704;20956;52067;54380;58530	8.20E-01;5.46E-01;4.86E-01;4.41E-01;6.08E-01	18912;23062;25378;56480;74738	4.00E-01;5.13E-01;7.98E-01;4.17E-01;7.71E-02
LOC105376108	-3.06926	1.24947	8	TAACAGTCGACGAAAGAGGG;ATCAGGAATAGAGGACTAGG;GTTAACAGGCTGTATGATGT;TGGGTACTAGGCAAGAACAG;TGTTACACACCCGACAGACA;GATCATTCCCAACACAACTT;CCATGTTGGACAAAAACAGT;TTCCGGTGGTAAAGCAGATG	-4.75;-4.54;-4.25;-3.38;-3.07;-2.73;-1.88;0.03	968;2036;4324;17800;24838;32055;46679;71065	1.04E+00;1.78E+00;2.14E+00;1.16E+00;1.23E+00;1.32E+00;1.04E+00;2.99E-01	6377;30763;45381;52612;59657;73117;75406;76474	4.42E-01;6.74E-01;8.63E-01;8.02E-01;7.35E-01;1.21E+00;7.58E-01;4.37E-02
LOC101060236	-0.897448	0.684851	1	GAGTAAAGCTTCCGATAGAG	-0.9	61442	0.101	16000	0.685
FAM151B	-1.66515	0.743285	6	AGGTACTGCTCACATGATAG;GGGGATGGGCCATAATTGGC;GCCGAGGCGGGCAGATCACG;ATATCGGCATTAATCCATAC;CAAGGCAGGCAGATCACCTG;GTGGTTAGCTGCATGATACC	-4.03;-2.4;-1.91;-0.72;-0.53;-0.39	6840;38275;46089;63631;65843;67276	4.77E-01;6.20E-01;5.53E-01;6.63E-01;3.99E-01;3.67E-01	10166;11599;13811;31359;39167;70600	4.09E-01;7.55E-01;1.20E+00;8.45E-01;1.01E+00;2.41E-01
FAM151A	-2.8269	0.664768	4	AAACCAATGTACTACACGGG;CAGGACGTACACCCAAGCCA;TATCTACAGTGACAACACAC;CAACATGCTCATCTCAACTG	-4.19;-2.76;-2.56;-1.81	4945;31527;35395;47733	6.79E-01;4.56E-01;6.83E-01;8.41E-01	29709;42066;45894;72497	4.45E-01;4.32E-01;4.70E-01;1.15E-01
LOC101927947	-1.72133	0.570573	2	GCCGAGGCGGGCAGATCACG;GGAATCTCACTCTGTCACCC	-1.91;-1.53	46089;52067	3.17E-01;3.45E-01	25378;31359	3.56E-01;7.85E-01
PAXIP1	-2.51462	0.572585	4	GCACACAAGTTAATCAACCC;GTGATTCTGTCCGTTCAGTG;GTGCGTGCATCGACTCGTGA;TCTTCATAAATAATCAGACG	-3.6;-2.39;-2.08;-2.0	13558;38475;43525;44777	4.05E-01;4.26E-01;5.07E-01;9.52E-01	32657;33917;38967;63898	4.86E-01;4.39E-01;5.97E-01;3.34E-01
LINC02424	-1.91411	0.392609	1	GCCGAGGCGGGCAGATCACG	-1.91	46089	0.225	31359	0.393
GPAT2P1	-1.80092	0.533138	3	TGCAGAACCTCCTCTCAGGG;AGCGGCTCCACAAGCTACGT;GGCAACAGCGACCCACAAAG	-4.18;-2.95;1.73	4988;27284;75564	7.72E-01;6.18E-01;3.20E-02	1878;50177;72452	1.16E+00;3.53E-01;8.68E-02
USE1	-2.34749	0.526981	5	GCGGAGTGAGCTACTAGGCA;GTGAAATCAGTGGAGTGGCA;GCGGCTGCTATCCCGCTGCG;CCAGTACGTGGGAGCCCTAG;CAAGGCAGGCAGATCACCTG	-3.67;-3.29;-3.18;-1.06;-0.53	12238;19767;22332;59145;65843	4.01E-01;5.70E-01;9.16E-01;3.96E-01;3.52E-01	11599;18297;55119;57672;65191	4.07E-01;6.04E-01;5.23E-01;4.06E-01;3.74E-01
CNRIP1	-1.73847	0.662707	4	CATCCAGCCTAATGACGGCC;TGGGACAAGCACACCACCAA;GAAGTCTAAAGAGCCTGATG;GGTGTGACCCCAACGAAGAG	-2.64;-2.22;-1.33;-0.76	33794;41180;55021;63250	5.05E-01;4.29E-01;3.82E-01;3.52E-01	14192;22421;36262;43648	3.99E-01;5.95E-01;6.61E-01;9.96E-01
ARMCX5-GPRASP2	-1.14751	1.81087	17	TTCAATCAAGGTCTCAACCA;CCAGTACGCGGATCCGCCAA;AAAGACCAGTATGAAAACTG;ACTGAGGTCCAAGTAATGGG;GCCGAGGCGGGCAGATCACG;CCAACCCCATGAAAAAGACC;AGGAAGCCCTCATTGGGACC;TCCAGACCAGGAATCAACAT;TGAGTTCTATAAGCAGTCCT;GACACATACAGTGACCTACA;CTAAACATCAGACTAATCCC;ACAGTACTGACCCTAGACAT;ATGAGTCTGTTAAGACACCC;AGTGGCCAGTGGCCAAGCAA;AAAGTATGGGCCTAATCCGA;ACAAGAACCCAGGTTTGAGG;ATCAGTACTGACAAGTGGAG	-3.56;-2.99;-2.22;-2.19;-1.91;-1.75;-1.69;-1.24;-1.08;-1.02;-0.9;-0.79;-0.34;-0.17;0.44;0.61;1.3	14241;26537;41189;41631;46089;48553;49577;56480;58939;59813;61408;62791;67754;69262;73016;73605;75074	9.17E-01;1.53E+00;2.61E+00;2.06E+00;2.05E+00;1.83E+00;1.51E+00;1.82E+00;1.66E+00;1.33E+00;1.12E+00;9.17E-01;9.89E-01;7.75E-01;7.36E-01;4.28E-01;2.29E-01	2368;3837;4426;8180;9688;14651;16034;17629;18503;20962;27865;28889;31359;35811;36250;50905;63202	5.00E-01;8.07E-01;1.25E+00;1.16E+00;1.42E+00;1.25E+00;1.51E+00;1.77E+00;2.16E+00;2.35E+00;1.95E+00;2.36E+00;2.63E+00;2.67E+00;3.36E+00;2.15E+00;1.50E+00
DTX3	-2.82828	0.687221	4	GACTGTGTCCAAGCCCGTGT;TAGGTAGAGCCCATTTGGAG;GTGCCGGCATTCATTCTGCG;GCAACCAGCCCCAGAATGGG	-3.64;-3.63;-2.89;-1.15	12781;12938;28701;57858	4.15E-01;9.35E-01;8.92E-01;5.06E-01	19584;48760;64491;64658	3.75E-01;4.86E-01;4.13E-01;3.13E-01
CDC34	-0.992691	1.10368	4	CCCAACACCTACTACGAGGG;CGAGGGCGATCTATACAACT;TCAGGAGGGAGATCACACTC;CATCTTGGTCAGGAACCGAA	-1.44;-1.36;-1.25;0.08	53460;54580;56403;71366	1.09E+00;5.85E-01;3.77E-01;1.42E-01	6076;21039;22862;23982	6.10E-01;6.29E-01;1.14E+00;2.04E+00
CDC37	-2.75675	0.60476	4	GACGCACCCCAACATCGACA;GCCCTCCATGTACTGGCGAT;TTGGTGCATTGACCTAGAGG;GCTGGCCAAGAGCCTAAAGG	-3.97;-3.12;-2.39;-1.54	7539;23616;38405;51833	5.43E-01;5.69E-01;6.09E-01;6.97E-01	25608;39023;53843;69896	4.02E-01;4.26E-01;3.88E-01;1.78E-01
OR2T34	-1.73777	0.774328	6	GGGGAAGCTCATGGTAATGG;TCTTGGGCACAGTCACGCAT;GTACGTGAGCATCTTATAGA;AAGCACTGATTTCACCCTCA;GAGTCTCACAGAAAAAACTC;TCTCAGCAAAGAGTCCCGTG	-2.66;-2.56;-2.15;-1.77;-1.28;0.0	33377;35309;42345;48287;55838;70608	8.12E-01;5.64E-01;5.17E-01;4.93E-01;4.87E-01;2.41E-01	6687;21604;29155;35097;42133;44081	4.82E-01;5.01E-01;5.87E-01;7.23E-01;8.85E-01;1.47E+00
OR2T35	-1.97475	0.558542	7	CCATGAATAAGCAAACCCTG;ATGAGGAGAGGGTACCGTAG;GAGCAGAATCATGACCAAGT;TGGTCTTGTCCTTGGACAGG;CACGCAGCAGGCATACATCA;CTACTGCAAAGAGAAGCCCG;TGTGCAAGACAACTTCAGCA	-4.11;-3.42;-3.28;-1.63;-1.36;-0.98;0.96	5801;17095;19977;50506;54666;60378;74486	4.83E-01;5.32E-01;7.40E-01;5.74E-01;4.97E-01;4.60E-01;1.18E-01	2956;17064;22776;26936;57466;60333;71641	6.75E-01;5.32E-01;6.55E-01;8.47E-01;5.03E-01;4.61E-01;2.37E-01
OR2T33	-3.50524	1.40212	5	CATGAGGGAATTGCCAAACA;TGAGGATGACCATGTCGTGT;AAACCAGCATCATGTCCATG;ACCACAATATGGGAAGCTCA;AGCCAAACGCACCAGCACGG	-4.77;-4.01;-3.59;-3.48;-1.67	877;7026;13726;15878;49815	1.27E+00;1.21E+00;1.42E+00;2.15E+00;9.58E-01	27627;61546;63714;70415;76565	5.15E-01;1.26E+00;7.57E-01;5.08E-01;2.47E-02
PROSER2-AS1	-3.04934	0.793184	4	TGGCGCAGAAGATTTCCGAG;CACCCCCGATCCCCCCAGGA;GATGACATCTTCAGGCTCGG;GACGATTGACTCCCTAGACG	-4.36;-2.93;-2.88;-2.03	3355;27920;28832;44307	8.19E-01;4.96E-01;8.87E-01;9.70E-01	33132;48630;49520;74082	4.94E-01;4.85E-01;4.24E-01;7.70E-02
SPIN2A	-1.15267	1.08556	7	AGCAGTGGAACACATGTTTG;GTCTCCCAAAAGAAGCAGAG;CAGCCCACGATGTTCCTGCG;TGTCATGTTTGCAGACCCAG;AGCCGAAGGGCAACAAACCA;GAGATGAGCCCATCACGCAG;ATATTTCACCAGATAAAGAG	-2.96;-2.46;-1.49;-1.14;-1.12;-0.16;1.26	27200;37152;52663;57935;58284;69356;75019	7.37E-01;7.35E-01;9.38E-01;7.56E-01;5.08E-01;4.23E-01;9.66E-02	2423;8086;19158;19507;24779;40309;50242	7.42E-01;8.80E-01;7.70E-01;1.23E+00;1.49E+00;1.18E+00;1.32E+00
SPIN2B	-0.897529	1.39764	7	GTCTCCCAAAAGAAGCAGAG;CAGCCCACGATGTTCCTGCG;AGCAGTGGAACATATGTTTG;TGTCATGTTTGCAGACCCAG;AGCCGAAGGGCAACAAACCA;GAGATGAGCCCATCACGCAG;ATATTTCACCAGATAAAGAG	-2.46;-1.49;-1.17;-1.14;-1.12;-0.16;1.26	37152;52663;57535;57935;58284;69356;75019	1.18E+00;1.49E+00;1.20E+00;7.56E-01;5.08E-01;4.23E-01;9.66E-02	2423;8086;19158;19507;19907;24779;40309	7.42E-01;8.80E-01;7.70E-01;1.23E+00;1.89E+00;2.29E+00;1.99E+00
PGLS	-0.670045	0.981229	4	CGGGGTTAATGGTGATCACC;TTCGCGCTCGGCCTGTCGGG;CAGCAGGTCGAAAACCGGGA;CGGCGTGATCGAAGGGCACG	-3.58;-1.01;-0.73;2.65	13830;59864;63506;76325	4.02E-01;7.34E-01;4.01E-01;2.52E-02	1117;13936;17577;63623	1.26E+00;8.84E-01;1.44E+00;3.41E-01
LOC105374610	-1.71806	0.695481	4	AGATATGTTTGATGGCCGCT;GCTGCCGTCAGTTGTCAGCG;GACCCGCATCGACCAAGATG;TCCTGGCTTCTCATCCACTG	-3.1;-1.36;-1.28;-1.14	24074;54698;55848;58043	3.90E-01;5.88E-01;3.78E-01;5.01E-01	19399;21594;22744;53368	3.75E-01;6.15E-01;1.15E+00;6.47E-01
LOC105379220	-1.91411	0.392609	1	GCCGAGGCGGGCAGATCACG	-1.91	46089	0.225	31359	0.393
LOC105370500	-2.35675	0.5891	6	CATCATGAGCATCATAAGTG;CTGGAGATTACTCTGGAAGG;GATAAAGCAAAAATCAACCA;GGAATCTCACTCTGTCACCC;CACCTCGTCCAGGTCCACGT;CAAGGCAGGCAGATCACCTG	-3.95;-3.76;-3.39;-1.53;-0.98;-0.53	7831;10818;17580;52067;60361;65843	4.48E-01;7.95E-01;9.66E-01;4.83E-01;4.19E-01;4.23E-01	11599;17082;25378;59834;66613;69603	3.99E-01;5.70E-01;6.70E-01;5.59E-01;4.03E-01;2.78E-01
LOC105370504	-1.03094	0.781511	2	GGAATCTCACTCTGTCACCC;CAAGGCAGGCAGATCACCTG	-1.53;-0.53	52067;65843	3.56E-01;1.41E-01	11599;25378	5.94E-01;9.69E-01
CCNA2	-1.55241	0.753942	4	ATTGACATGTCCATAGTATG;GTGGACTGGTTAGTTGAAGT;GCCTGCGTTCACCATTCATG;CTGAAGTCCGGGAACCCGCG	-2.82;-1.54;-0.97;-0.88	30160;51902;60503;61700	4.50E-01;5.33E-01;3.80E-01;3.95E-01	15741;16939;25540;47301	3.86E-01;7.56E-01;1.02E+00;8.56E-01
DIAPH2	-0.714537	1.96803	11	TATGACCGCGAAACCAATCG;TAGATTAAGTGATATTCCTG;GCCGAGGCGGGCAGATCACG;CAGATAGTGCTACACTGCAG;TTGCATCTCTCTCACACAGT;CAAGGCAGGCAGATCACCTG;CATCGTGGGGGTAATCAGAG;GACGGTGTGATAATTCAGTT;GAGAATCGCTTGAATCCGGG;TGCTGGTTAAAGAAACCCTG;ACATATACTCCGACTGACAA	-2.42;-2.1;-1.91;-1.82;-1.32;-0.53;-0.52;-0.26;0.44;1.23;1.36	37852;43137;46089;47517;55269;65843;65960;68505;73043;74976;75147	2.18E+00;1.95E+00;1.60E+00;1.22E+00;1.33E+00;1.88E+00;1.29E+00;1.02E+00;9.80E-01;5.96E-01;1.44E-01	2295;2466;4399;8937;11481;11599;22173;29925;31359;34311;39604	6.17E-01;1.38E+00;1.72E+00;1.61E+00;1.90E+00;2.64E+00;1.87E+00;1.72E+00;2.24E+00;2.75E+00;3.20E+00
CCNA1	-2.65617	0.602139	4	AGATGAATCTACCAGCATAG;AAGAAAGCACTCCCTGACTG;ACAAACTCGTCTACTTCAGG;AAGCAGCCAGACATCACGGA	-4.16;-3.48;-1.87;-1.12	5250;15761;46836;58348	6.58E-01;8.02E-01;4.56E-01;4.92E-01	19094;30606;61693;72190	3.75E-01;4.65E-01;3.86E-01;1.22E-01
DYNC1I1	-1.74384	0.624598	6	GATGACTGCGATTGTCCCAG;AGTGCTCACTGATTTCGAGG;TGCAGTCAGACTCAGAACTT;TCGCAAACGACGAGAGACAG;CAAGGCAGGCAGATCACCTG;GAGAATCGCTTGAATCCGGG	-3.86;-3.15;-1.87;-1.5;-0.53;0.44	9217;22960;46844;52489;65843;73043	4.21E-01;4.91E-01;5.64E-01;4.83E-01;3.99E-01;1.52E-01	4399;11599;24953;30598;54482;68232	5.94E-01;7.55E-01;6.81E-01;8.74E-01;5.13E-01;3.30E-01
VPS28	-3.52367	1.19342	4	AGGCACTCACGCGGAACTTG;TGTCCTCAGGTACGACAACA;AGACCACGTCTGCGATGCAG;ACGTGGGCTCTTACTCGCTG	-4.45;-3.61;-3.52;-2.52	2641;13426;15075;36017	9.10E-01;9.09E-01;1.62E+00;1.33E+00	41399;62383;64003;74801	6.66E-01;8.32E-01;4.07E-01;6.03E-02
DYNC1I2	-3.64149	1.4201	4	AAGCATTGCTTCAAAGCATG;CAACATTTACACAATATACA;ACGTTGGTCAAAGCATCGGG;GTATTTACTTAATTTAGACG	-3.89;-3.84;-3.6;-3.23	8730;9506;13459;21082	5.02E-01;1.16E+00;1.76E+00;2.26E+00	56383;63988;67927;68715	1.23E+00;9.08E-01;4.79E-01;2.08E-01
SKA1	-1.69277	0.652639	4	CTCTGGGTTACTGTTACTTG;AATTTGATTATAGGTTAAGC;CATTACCTTGAGTGAATTGT;ACCTTATCATTAAGAAACTG	-2.91;-1.83;-1.79;-0.24	28257;47344;47990;68715	4.27E-01;4.70E-01;4.41E-01;2.08E-01	8727;29452;30098;49185	5.02E-01;4.77E-01;8.43E-01;7.89E-01
SKA3	-2.34809	0.552459	5	AGTTCTACCAAACCCTCCAC;TCTGAAAGTTGTGGACTACG;TTTCACAATTAGACAACTCT;CAATGGGACTTAAAAATGCG;GAGAATCGCTTGAATCCGGG	-4.42;-3.61;-2.71;-1.44;0.44	2821;13416;32357;53464;73043	8.04E-01;7.71E-01;6.07E-01;4.54E-01;1.27E-01	4399;23978;45085;64036;74618	6.48E-01;5.01E-01;4.63E-01;3.93E-01;8.06E-02
SKA2	-3.28485	0.987477	4	GGTCGATAAGCTGGAACTGA;CAACAGCAACTGGTTTAAAG;GGATTACATTCAATACAGGC;TCATCCTGATTCAGCAAGTG	-3.76;-3.72;-3.22;-2.44	10827;11379;21405;37456	4.49E-01;1.03E+00;1.21E+00;1.26E+00	39986;56022;66052;66623	6.31E-01;6.19E-01;4.38E-01;2.61E-01
GRID2IP	-2.64532	0.661151	5	ACTCGATCCAGACAGGCCCG;CCAGACTGGGCGGCACACGT;AGCGGGTGGATGATCTGGTG;GCCGAGGCGGGCAGATCACG;CAGACCCCATAGCGCTCAGG	-4.34;-3.33;-2.0;-1.91;-1.64	3532;19029;44695;46089;50296	7.23E-01;5.87E-01;4.64E-01;5.95E-01;9.37E-01	27146;31359;32747;58396;73913	5.06E-01;4.62E-01;5.99E-01;4.01E-01;1.01E-01
PCDH20	-2.75102	0.615692	4	AAACGAGGGACTACCCGCGG;GTGTATGGGAATGCTACAGT;TAACGAGGGACAATTTCAGG;CGTCCAGGGTGAACATACCA	-3.69;-3.42;-2.6;-1.29	11878;16943;34550;55738	4.29E-01;7.56E-01;7.06E-01;5.71E-01	21704;42889;60482;65557	3.79E-01;4.36E-01;3.80E-01;2.89E-01
MT1P1	-2.89159	0.5532	2	CACACTTGGCACAGCCCACA;TGCTGCTCCTGCTGCCCTGT	-3.77;-2.01	10634;44511	6.25E-01;4.81E-01	32931;66816	3.11E-01;1.28E-01
MT1P3	-1.54297	0.650939	2	GCAGCAGCTCTTCTTGCAGG;GGTGGCTCCTGCACGTGCGC	-1.58;-1.51	51292;52391	3.49E-01;3.39E-01	25047;26150	3.59E-01;9.43E-01
C6orf89	-2.75962	0.990568	9	AGGGGCTGGAATTCTCGCAA;AAAGACTTCATGATCCAAGG;AGACAGACCGGCCATCAGTG;TCCAATCGGGCAGGTCGAGG;TTATACACAACTATAAGGAG;CAAGACGGGAAAGCCCCTGT;GCCGAGGCGGGCAGATCACG;AGGACATCAGCCTAATGTGA;GCTCGTCGAGGTTACTACAA	-5.11;-4.13;-3.96;-3.45;-3.01;-2.8;-1.91;-0.4;-0.06	151;5596;7751;16470;26030;30677;46089;67255;70030	1.76E+00;9.54E-01;1.35E+00;1.11E+00;9.79E-01;1.15E+00;8.07E-01;4.17E-01;3.93E-01	7412;10187;31359;46782;51429;60978;69678;71855;77291	4.14E-01;6.34E-01;6.06E-01;7.87E-01;6.84E-01;7.16E-01;7.63E-01;4.48E-01;7.58E-03
PPP1R13B	-2.07805	0.573262	5	GATTCGTAACCAACTTAACC;AGACTGGAAGGATCCGAGCG;CAGGCCTGCCAAGTCGACAG;GGAATCTCACTCTGTCACCC;GCCGGCTGGTAATTCTTAGG	-3.15;-3.04;-1.64;-1.53;-1.04	23016;25387;50399;52067;59487	4.41E-01;4.86E-01;4.73E-01;4.75E-01;5.73E-01	17955;25378;27043;52055;54406	3.94E-01;4.86E-01;7.44E-01;4.75E-01;7.67E-01
PPP1R13L	-0.419255	1.23679	5	ACTCTCTGATCGTCCGAACG;ACATGGCCCCCTGTGAACGA;GACCTTGTAATTGCGCGGCA;TCCTGCCTCAGCCTCCCGAG;GCGCGGCCCAGGAAGTCGAA	-2.97;-1.69;-0.48;-0.4;3.43	27022;49600;66456;67218;76742	5.04E-01;7.20E-01;8.96E-01;4.26E-01;1.97E-02	700;10224;10986;27842;50437	1.36E+00;9.43E-01;1.68E+00;1.27E+00;9.31E-01
TMC5	-2.45063	0.479976	4	GCTAGACTCAAGCATCAACA;CATAATCCCTCAGTTTACCG;CACTCCTGTAGAGACAACCC;TTAATGCAGGACACAACGAA	-3.74;-2.75;-2.37;-0.95	11126;31682;38725;60804	4.43E-01;4.55E-01;6.02E-01;4.20E-01	16638;38718;45739;66329	3.81E-01;4.26E-01;4.72E-01;2.69E-01
LOC107986788	-1.52854	0.484514	1	GGAATCTCACTCTGTCACCC	-1.53	52067	0.172	25378	0.485
LOC100128239	-1.91411	0.392609	1	GCCGAGGCGGGCAGATCACG	-1.91	46089	0.225	31359	0.393
LOC105373347	-0.399969	0.87935	1	TCCTGCCTCAGCCTCCCGAG	-0.4	67218	0.0615	10224	0.879
WNT10A	-2.47216	0.529897	4	CAATGTTAGGCACACTGTGT;TGGTAAGGGCCTGAGCCATG;TGTGAAGCCTCATTCTCGCG;TTGGTGTTGGCATTCGTGGA	-3.82;-2.63;-1.75;-1.68	9756;34088;48517;49623	4.73E-01;4.38E-01;4.35E-01;7.73E-01	27824;28924;43344;67686	4.23E-01;4.83E-01;5.10E-01;2.34E-01
WNT10B	-1.31083	0.740365	5	GGGTGGCTGTAACCATGACA;CACAGCGCCATCCTCAAGCG;GCGAATCCACAACAACAGGG;CAAGGCAGGCAGATCACCTG;GCGCGGACGCCGTCACGTCG	-3.71;-2.66;-1.38;-0.53;1.73	11585;33494;54323;65843;75554	4.08E-01;4.66E-01;5.12E-01;4.07E-01;5.36E-02	1888;11599;23119;43948;65844	9.57E-01;8.61E-01;8.83E-01;6.49E-01;3.52E-01
OR4A4P	-3.02037	0.476191	1	GGGCTTCACACAGAATCCAA	-3.02	25869	0.476	51585	0.176
OR4A47	-1.4599	0.632242	4	CATATCCTTCCAATCTTGCA;GGGCTTCACACAGAATCCAA;ACAAGCCTGAAATCAATCTG;CCACTAAGAGGCCAATAGCA	-3.51;-3.02;-2.19;2.89	15140;25869;41637;76471	3.90E-01;5.27E-01;5.41E-01;2.19E-02	971;35805;51585;62288	1.32E+00;4.31E-01;4.04E-01;3.78E-01
HOGA1	-2.04755	0.633806	8	GTGGATCTCTTGGATCACTG;GACAACAATGCCAGCGCTAG;GAAGGTCTCTATGTGAACCG;ACAGTGTCCCAGCCAACACA;CAGCCCCACTTACCTCGGAA;GCACACGGCTCACCACCTCG;GAAGGATTCCCGGTGCAGAG;GCGGCCACGATAGTAGCAAG	-3.94;-3.7;-3.43;-3.0;-2.51;-2.05;0.59;1.66	7994;11702;16880;26284;36231;44023;73542;75483	4.14E-01;6.21E-01;7.70E-01;7.52E-01;7.23E-01;7.55E-01;5.52E-01;8.90E-02	1959;3900;33419;41211;51181;60562;65725;69433	7.72E-01;1.28E+00;5.73E-01;5.70E-01;5.60E-01;5.17E-01;4.16E-01;3.79E-01
LOC105377994	-1.24188	0.684905	2	TGAAGGTCAATGGATCCACC;GAAATCACTAGGAACTCCAG	-2.62;0.14	34201;71719	3.07E-01;6.67E-02	5723;43241	8.64E-01;5.06E-01
LOC102724687	-1.50973	0.826302	6	CAGCTGCATCTTGTGCGCGC;GCGGTGCGCCGGACCCACGC;TGGAGGACCAGTTCGCCAAG;GGAATCTCACTCTGTCACCC;CAAGGCAGGCAGATCACCTG;TACCGGACACCAGAGTAAGG	-2.76;-2.68;-2.09;-1.53;-0.53;0.53	31533;33091;43266;52067;65843;73359	7.47E-01;5.31E-01;5.23E-01;4.83E-01;3.99E-01;1.41E-01	4083;11599;25378;34192;44339;45888	6.17E-01;7.55E-01;6.70E-01;7.50E-01;8.02E-01;1.36E+00
TM4SF18	-2.36344	0.464467	4	AGCATACTCCCAGCCATCAA;GCGGAATCAGCAAACAACTT;ATAAACTCACCAACTACGTG;AAACTGCAGCAAAAAATATG	-3.61;-2.91;-1.74;-1.19	13310;28277;48732;57226	4.08E-01;4.92E-01;4.32E-01;5.26E-01	20216;28710;49175;64146	3.75E-01;4.86E-01;4.27E-01;3.27E-01
TM4SF19	-1.01061	0.885834	4	AGGAAGGAGGAGTGCCACGT;GATGTCACCTACCTGTTGAG;TACGGCTGCTTCAGTAAGAG;AACCCCGGACACTTACCATG	-3.92;-0.96;-0.86;1.69	8331;60630;61976;75523	5.14E-01;7.61E-01;3.88E-01;4.36E-02	1919;15466;16812;69101	1.04E+00;8.15E-01;1.49E+00;1.98E-01
FRG2EP	-3.34075	0.774187	2	GAGAAGCACACACAAAGGCA;CTCCGACATAGCTCGCACAG	-4.13;-2.55	5626;35484	8.70E-01;6.78E-01	41971;71814	3.04E-01;6.55E-02
TMEM35B	-0.882604	0.954758	4	TTCTTGATTCTGCTCATGAT;CTCAGCAAACTGCACGAACA;TGGTAGCCAAATACCTTCAG;CCTGAACTACCAAATAGCTG	-2.29;-1.7;-1.49;1.95	40045;49430;52606;75766	6.33E-01;4.95E-01;3.96E-01;3.80E-02	1676;24836;28012;37397	1.09E+00;5.46E-01;9.18E-01;1.26E+00
TMEM35A	-0.812874	1.21403	4	GCCTGGGCGTCCCAAAGATG;TTCACTTACCATCTCACTGT;AAGGGTCATGACGATGCCAC;GAAAACAAAGAAGAGTCCCA	-1.59;-1.0;-0.57;-0.09	51152;60002;65439;69845	9.86E-01;7.38E-01;4.27E-01;1.79E-01	7597;12003;17440;26290	5.41E-01;9.88E-01;1.45E+00;1.88E+00
LAMB1	-2.7459	0.727263	5	ATGTGCAGGCATAACACCAA;TGACTGCGACCCAGTGACTG;ACGGAACTTAACGAACCCTG;GAAGTATCTATACACACCCC;CAAGGCAGGCAGATCACCTG	-3.6;-3.49;-3.11;-3.0;-0.53	13486;15697;23748;26394;65843	3.92E-01;6.81E-01;8.58E-01;1.35E+00;3.52E-01	11599;51062;53672;61729;63963	4.07E-01;7.65E-01;5.04E-01;3.88E-01;4.15E-01
LAMB3	-1.51492	0.722677	4	GTGTGCAAGGAGCATGTGCA;TGGGTGCGCAGCGATCAGCA;AGGCGTGCATTAGGCCTCTG;CTACTGCACCCAGTATGGCG	-2.77;-1.83;-1.65;0.19	31161;47382;50228;71997	4.64E-01;4.71E-01;4.16E-01;1.27E-01	5445;27214;30060;46281	6.46E-01;5.06E-01;8.44E-01;8.94E-01
LAMB2	-2.52977	0.612133	4	CACCGTCTTGAGAACCCATG;GCGCTGTTTACACCACACAG;ACAACCTACTCGACCCACGG;AGATAACAGGGTCTAACCTG	-3.03;-2.67;-2.31;-2.11	25690;33212;39730;42988	4.02E-01;4.44E-01;5.80E-01;1.02E+00	34454;37712;44230;51761	5.17E-01;4.27E-01;4.95E-01;7.00E-01
ATP7A	-1.75768	1.15372	11	AGATGTGGCTGCCAGTGGTG;AGGGTAGCTGATCTTCTGTG;TGATCAGATGTGGCTGCCAG;GATCACTCTCTTCTGCACTG;CGACGCCGATCTGAGCCCGG;CAAGGCAGGCAGATCACCTG;AATTACAATCCATACCAAGA;AAATTCATAACAGACAATCC;ACCCTCCTATGAGAGTCCGA;CAATAGAGGCTGTATCACCG;CTTTACTCTCCATACAGGGG	-5.6;-4.2;-4.17;-2.29;-2.28;-0.53;-0.53;-0.48;-0.19;0.3;0.64	3;4814;5142;40129;40136;65843;65875;66472;69102;72491;73720	3.37E+00;9.23E-01;1.55E+00;8.43E-01;6.66E-01;1.88E+00;1.28E+00;8.60E-01;6.41E-01;4.40E-01;2.35E-01	3722;4951;8340;10970;11567;11599;37306;37313;72304;72628;77439	4.91E-01;9.06E-01;1.08E+00;1.34E+00;1.89E+00;2.64E+00;8.44E-01;1.18E+00;8.84E-01;4.44E-01;1.23E-04
LAMB4	-0.717134	1.10294	4	TTTGAATTTCTATCTCTACG;CGGTGGCGCTTAGTCCGTAG;CGACCACAAGAGGTTTACAC;CTGTACGAGATGATTGTTCG	-1.91;-1.28;-1.27;1.59	46142;55895;55991;75410	8.03E-01;6.16E-01;3.78E-01;4.62E-02	2032;21451;21547;31310	1.01E+00;6.19E-01;1.21E+00;1.57E+00
CYSLTR1	-1.10875	1.09542	5	CATACAAAGCATAGGTGCTG;AATACCTACACACACAAACC;TGTGAACATAATAGACCACA;CAAGGCAGGCAGATCACCTG;AGGTGGAATACACTTGATTG	-3.71;-0.79;-0.78;-0.53;0.26	11571;62905;62982;65843;72355	4.08E-01;1.36E+00;7.27E-01;4.07E-01;1.48E-01	5087;11599;14460;14537;65864	6.02E-01;8.61E-01;1.37E+00;2.30E+00;3.52E-01
MPHOSPH9	-2.0909	0.705034	5	ATTGAATAGCTGTAACCACC;AGGCTCTAGAACAGAGTCCG;GGAGGTTCAAGATCTAAACA;GATGAAGCTACCGTCACTGA;GGAATCTCACTCTGTCACCC	-2.64;-2.49;-1.98;-1.81;-1.53	33770;36590;45022;47703;52067	6.57E-01;4.85E-01;4.63E-01;5.58E-01;8.62E-01	25378;29739;32411;40852;43673	4.75E-01;4.63E-01;6.06E-01;7.38E-01;1.24E+00
MPHOSPH8	-0.982385	0.754808	4	CATAGACGATCACAAAACCA;GTCCACGGACTCAGCCGAGG;ATACATCGGATGATGATACC;GAGAGAGCAGGGCAGGACAT	-4.02;-3.07;-0.88;4.04	6998;24668;61733;77007	5.65E-01;5.49E-01;3.86E-01;9.76E-03	435;15709;52774;70439	1.66E+00;8.04E-01;3.94E-01;1.65E-01
MPHOSPH6	-3.28642	0.974369	4	CAAGAATCTACTGCGCATGA;AGAGCTTAAAGAGAAAGAGT;AAATCATTAGTGAAGAGCAC;ATATTTAATACCTCAACCTC	-3.95;-3.86;-3.08;-2.26	7917;9150;24577;40564	5.29E-01;1.19E+00;1.06E+00;1.12E+00	36878;52867;68298;69515	5.63E-01;5.50E-01;4.89E-01;1.88E-01
ASTN2	-2.69848	0.861798	10	TGATACAGCTGGGCTCAGCG;CTTGTATACGATAGTTACCA;CCCTACACGACACTTGAGAG;TTTATCATACAGTTGCGTGG;GCTACCTGGACATCTCCGAC;GGCAGATGTAGCACTACTGG;GCCGAGGCGGGCAGATCACG;AACTCAGCTGACATTCTACA;GAAGCCCCGGACAGTTAACG;CAAGGCAGGCAGATCACCTG	-4.77;-4.14;-3.72;-3.72;-2.87;-2.73;-1.91;-1.47;-1.11;-0.53	900;5487;11335;11442;29060;31983;46089;52978;58443;65843	9.80E-01;9.01E-01;9.06E-01;1.42E+00;7.48E-01;9.08E-01;6.77E-01;6.67E-01;7.10E-01;7.05E-01	11599;18999;24464;31359;45459;48375;65995;66111;71953;76542	4.59E-01;5.45E-01;5.76E-01;6.01E-01;6.76E-01;6.06E-01;8.98E-01;5.66E-01;4.37E-01;5.07E-02
ASTN1	-2.36235	0.50308	5	TGATGATCCTGTATACTCGC;CCTTACACAATATTTCAGCG;TGACGTGAGAGGAGCACACG;AGGGCTGCAATGAAAAGTCG;CAAGGCAGGCAGATCACCTG	-3.85;-3.5;-2.12;-1.81;-0.53	9308;15451;42872;47694;65843	4.44E-01;6.90E-01;4.71E-01;5.59E-01;3.52E-01	11599;29748;34570;62002;68140	4.07E-01;4.63E-01;5.64E-01;3.88E-01;2.78E-01
MLF2	-1.83363	0.626157	4	ATGAGCCGTATGTTGTCAGG;ACCATCACCCGTATTGGAGT;GTCCCGGATGTGATGCCCAA;CATTCCCAGCATCCCAAAGG	-3.07;-1.67;-1.54;-1.04	24619;49798;51872;59407	3.94E-01;5.00E-01;4.01E-01;4.61E-01	18035;25570;27644;52836	3.76E-01;5.32E-01;9.32E-01;6.64E-01
LOC105372121	-0.734792	0.877603	2	GCCGAGGCGGGCAGATCACG;GAGAATCGCTTGAATCCGGG	-1.91;0.44	46089;73043	3.17E-01;5.08E-02	4399;31359	9.70E-01;7.85E-01
LOC105374976	-0.533336	0.82455	1	CAAGGCAGGCAGATCACCTG	-0.53	65843	0.0705	11599	0.825
LOC105374970	-0.533336	0.82455	1	CAAGGCAGGCAGATCACCTG	-0.53	65843	0.0705	11599	0.825
LOC105374971	-2.74535	0.681369	4	GGAAATCGAGAACAACCCCA;GGACGACGACAAGCCCACTG;CGCCCCCAAACGACCCAAGG;GACAAGCCGACCCACGCTGG	-4.23;-3.79;-2.48;-0.48	4543;10220;36794;66452	7.08E-01;1.10E+00;6.47E-01;2.66E-01	10990;40648;67213;72899	4.45E-01;4.28E-01;4.62E-01;1.05E-01
LOC729159	-2.12832	0.462685	4	CCTGAGGTGTCCAAACATCG;GAAATGGCCCCAGATTCCCC;TGTCTTAGCCCTCAGAACAC;TCACGGACAAGACGAGCAGG	-3.52;-3.23;-1.11;-0.65	14987;21106;58470;64488	3.91E-01;6.27E-01;3.75E-01;3.18E-01	12954;18972;56351;62475	4.13E-01;6.88E-01;3.77E-01;3.73E-01
LOC105374978	-1.52854	0.484514	1	GGAATCTCACTCTGTCACCC	-1.53	52067	0.172	25378	0.485
MGP	-2.90257	0.692025	4	GGAGAGCTAAAGTCCAAGAG;TCCCTATTGAGCTCGTGGAC;CAAAGTTACTACCGCTAAGG;GCGGTAGTAACTTTGTGTTA	-4.12;-3.16;-2.93;-1.4	5725;22795;27732;54087	6.29E-01;5.87E-01;9.28E-01;6.24E-01	23355;49710;54647;71712	3.86E-01;4.99E-01;3.83E-01;1.34E-01
HS3ST3B1	-2.88722	0.676341	4	ATCATCGGCGTGAAGAAGGG;TAGCTGCGATCGAAGAAATG;ATGTTCCTGTACTCGTGCGC;TCAGGCAAGGAGATGGCCGA	-4.0;-3.25;-2.85;-1.45	7232;20616;29539;53347	5.55E-01;6.40E-01;8.62E-01;6.47E-01	24100;47897;56849;70203	3.91E-01;4.76E-01;3.76E-01;1.70E-01
ADSS	-2.33383	0.454518	4	TGACAGAGCTCATATTGGTA;AATTTGAAGAGGTTACAAAA;TTTGGATTAATTATTCCACT;CAGCTTTGGACGAATAAACT	-3.79;-2.52;-2.45;-0.58	10338;36138;37335;65353	4.59E-01;4.30E-01;6.34E-01;2.95E-01	12089;40123;41311;67107	4.26E-01;4.27E-01;5.48E-01;2.49E-01
SAMD4A	-2.77471	0.725846	5	AGGCAGATGAGTTAACAGGA;ACCGTCCAGGACATCATCGA;CTGATGACAAGCTCAATGGG;CATCAGTGAGGGCTGACGCG;GCCGAGGCGGGCAGATCACG	-3.9;-3.77;-2.28;-2.01;-1.91	8625;10568;40227;44606;46089	4.59E-01;9.21E-01;4.90E-01;6.32E-01;1.13E+00	31359;32844;37212;66861;68826	5.95E-01;4.64E-01;5.24E-01;4.21E-01;2.56E-01
ADSL	-2.24783	0.513589	5	TATTGAAGTACTGTCTGTGC;CAGCAACGTTCTGAACGCAT;GGTATAAATTCCGGACATGG;GCCGAGGCGGGCAGATCACG;AAATGTGTGAAACCTAATGT	-3.28;-2.86;-2.3;-1.91;-0.88	19997;29315;39963;46089;61642	4.08E-01;4.64E-01;4.92E-01;5.95E-01;4.95E-01	15800;31359;37481;48142;57419	3.88E-01;4.62E-01;5.20E-01;5.49E-01;6.50E-01
SAMD4B	-2.69503	0.965087	9	AGCATTGCTCTCGATTGAGT;CCTTGACGTGAATGGTAGGA;CATCTCCAATGAGAAGCCTG;ACCATTGGGGTCGATGCGGT;TTATCACAGAACGTCACCAA;CCAATACTGTTGATGGCTGG;CAGCAAACCCCGAGTCACAC;CAAGGCAGGCAGATCACCTG;AGACGTTGAAGAAACGAAAG	-4.86;-4.37;-3.44;-3.29;-3.26;-3.14;-0.87;-0.53;-0.5	582;3297;16621;19944;20564;23212;61764;65843;66226	1.20E+00;1.32E+00;7.10E-01;9.03E-01;1.32E+00;1.68E+00;5.19E-01;4.34E-01;6.12E-01	11216;11599;15678;54230;56862;57506;60811;74144;76860	4.28E-01;5.86E-01;7.46E-01;1.13E+00;8.73E-01;6.19E-01;5.15E-01;5.68E-01;2.94E-02
PLA2G15	-3.06554	0.904589	4	TGTACATGTTGCCCATACTG;GGTTTACAACAAAACATCCA;GGGCGCACCCAGTGACACGA;GTTGGTTACCCAAATCACCA	-4.31;-4.13;-2.82;-1.01	3777;5663;30214;59950	7.75E-01;1.56E+00;8.39E-01;4.45E-01	17492;47228;71780;73665	3.78E-01;4.69E-01;6.33E-01;8.68E-02
GAS2L1	-1.296	0.769471	4	GGTGCTCATGTTTGAGACTG;TGATCATGGGAAACTGGTCA;GCTTACGAAGCACAAAGGAG;GGTACCCGCAGTGATGACAC	-3.2;-1.74;-0.76;0.52	21835;48713;63212;73305	3.79E-01;4.86E-01;3.98E-01;9.54E-02	4137;14230;28728;55615	7.42E-01;8.70E-01;8.91E-01;5.75E-01
ACVR1C	-2.56952	0.64003	5	CCAAGATCTTTCATCTCTGG;ATTGTCCTTTGAACCAACAG;CTGGCGCTCTCAATTGCTAG;GCCGAGGCGGGCAGATCACG;TGTAGGAGCACTGTCGACCC	-3.26;-3.13;-2.68;-1.91;-1.87	20431;23456;33080;46089;46804	4.12E-01;5.08E-01;5.92E-01;5.95E-01;1.09E+00	30643;31359;44362;54003;57012	5.79E-01;4.62E-01;4.65E-01;4.46E-01;6.65E-01
GAS2L3	-0.552299	0.920338	4	ATGTTTGTCAGTACGATGAG;CCAGCATCTTCACTGAAAGG;CAAACTGTAATATTCGACAG;TGAAGGACGGTACCGACTAG	-4.01;-2.33;-1.38;5.51	7085;39471;54343;77348	5.62E-01;4.26E-01;3.85E-01;2.09E-03	94;23099;37971;70362	2.32E+00;5.80E-01;6.19E-01;1.67E-01
GAS2L2	-2.99989	0.887807	4	CCCACTAAGGGCCGTCACTG;AGAGGTGCTGATGTTCGAGA;CCCCTACACGTACCATCACA;TCGGCTGGGCCAAAGGAACG	-4.37;-4.17;-2.56;-0.91	3299;5153;35315;61335	8.25E-01;1.64E+00;6.85E-01;4.05E-01	16107;42127;72285;74143	3.84E-01;4.33E-01;6.64E-01;7.56E-02
HPGDS	-2.77771	0.751918	4	TCCAAGTCTTGCATAAGATG;AGATATTTGACCAAAAACAC;ATCTTGCTATTGCTAGGCTC;ACAGAATAGAACAAGCTGAC	-4.19;-3.81;-3.04;-0.06	4884;9883;25437;70034	6.83E-01;1.13E+00;1.02E+00;1.75E-01	7408;51987;67551;72551	5.48E-01;5.34E-01;4.70E-01;1.13E-01
RPS15AP1	-1.6703	0.567519	2	ATCAACAATGCCGAAAAGAG;TGACGTGCAACTCAAAGACC	-1.99;-1.35	44842;54827	3.12E-01;3.00E-01	22615;32600	3.84E-01;7.52E-01
ZW10	-3.05466	0.892938	5	AAAGTGCCAGGATGTGATTG;GACTCACTGATACGGCATGT;TTGATACGTGAAGATCCCGG;CACTGAACAATCGCACAAAG;GCCGAGGCGGGCAGATCACG	-4.69;-3.57;-3.07;-2.03;-1.91	1225;13973;24696;44334;46089	1.13E+00;7.47E-01;8.23E-01;6.39E-01;1.13E+00	31359;33108;52763;63470;76218	5.95E-01;4.65E-01;4.93E-01;3.90E-01;3.46E-02
RSRC1	-1.42938	0.739577	5	CTATCATAAGAATGTGAACG;ACTATCTGAAGAACTGCTCG;GCCGAGGCGGGCAGATCACG;GGAAATCCTATAGAGTTCAG;GAATTACATAACATCAAACG	-3.52;-2.0;-1.91;-0.68;0.97	14950;44772;46089;64133;74508	3.88E-01;6.00E-01;4.62E-01;3.93E-01;8.38E-02	2934;13309;31359;32670;62487	7.90E-01;7.75E-01;6.29E-01;1.04E+00;4.66E-01
RSRC2	-1.91669	0.595193	4	CAAGATCTAGGTCTCGTGAA;GAAGCAGGGAAAGAAAACGG;CTCTAAGAAACATAAGTCTG;GACAAGGAGTAGGAGTCGGT	-2.89;-2.37;-2.34;-0.07	28715;38809;39271;69965	4.32E-01;4.26E-01;5.90E-01;1.76E-01	7477;38184;38618;48727	5.45E-01;4.26E-01;6.04E-01;8.05E-01
LOC107985077	-2.31329	0.311743	1	GAAAGGACTTCTCAGTACAC	-2.31	39665	0.291	37777	0.312
CPN2	-2.37752	0.565024	4	CAGTAACCCCAACTTGACCA;TCAGAAAGGTCAGATTACCC;TTGTGACTGCTTCGTCCAGG;ATGAGAGCATGAGGGAACGC	-4.53;-2.99;-1.2;-0.78	2077;26406;57041;62910	1.00E+00;5.19E-01;3.76E-01;3.61E-01	14532;20401;51036;75365	3.95E-01;6.46E-01;4.08E-01;4.72E-02
CPN1	-2.09848	0.562387	5	TACTATAACGAGAAGTACGG;GCTGTCGGAGTTTCTGTGCG;CGAATGCCCCGGCATCACGC;GGAATCTCACTCTGTCACCC;GCTCAAAGGACTTGTCATAC	-3.09;-3.0;-1.92;-1.53;-0.96	24298;26303;46042;52067;60606	4.59E-01;4.79E-01;4.62E-01;4.75E-01;5.32E-01	16836;25378;31400;51133;53153	3.90E-01;4.86E-01;6.28E-01;4.91E-01;8.17E-01
LOC107985070	-2.06299	0.614629	8	CCAGACCTTGACAGTCTACG;ACATGCAAAGCCTCGGCCGT;TTAATGACGGCATAGAAACC;TCCAGATCAACAGCCACTAC;GAGCCCAAAAGGCATGCGAC;CCAAGTCACAGCGACTGATG;ACTTGCTTTCCACAAAAGCC;GTGTTCCAAAAGGATCATCA	-3.97;-3.85;-3.08;-1.71;-1.54;-0.9;-0.75;-0.7	7640;9391;24463;49177;51848;61358;63361;63900	4.19E-01;7.22E-01;5.78E-01;6.95E-01;5.66E-01;5.25E-01;4.47E-01;6.68E-01	13542;14081;16084;25594;28265;52983;68066;69807	4.39E-01;5.56E-01;8.05E-01;7.75E-01;1.03E+00;5.43E-01;4.06E-01;3.61E-01
CDADC1	-1.63089	0.710132	4	AGATTGCTCTTATTAAACAT;TTGAAGTAAGACACACACAT;TAATCTGTTCTGGATTGCTA;GGTAAAGAGAACTGGTCTTG	-3.41;-3.4;-0.09;0.38	17249;17502;69815;72796	3.78E-01;7.36E-01;5.40E-01;1.07E-01	4646;7627;59931;60205	7.00E-01;1.33E+00;3.78E-01;4.37E-01
GABBR1	-1.11477	0.754855	4	CTGAGGTCTTCACTTCGGTG;ACGGCGCGCAGTGTACATCG;CATTACCGACCAAATCTACC;AGATTGAGTATGTGTGCCGG	-3.53;-2.99;-0.56;2.63	14717;26516;65517;76309	3.94E-01;5.17E-01;4.28E-01;2.56E-02	1133;11925;50949;62725	1.25E+00;9.92E-01;4.09E-01;3.66E-01
NLGN2	-2.02423	0.478897	4	CAAAGATGGTGATACGCTCG;GTCAGTAAAGAGCGCCAGCA;CCCAAGACGGTAGTTGAGCG;GCTCACAAAAAAACGTGACG	-3.83;-3.05;-2.12;0.9	9590;25198;42907;74366	4.77E-01;5.39E-01;5.18E-01;7.04E-02	3076;34544;52246;67861	8.52E-01;4.36E-01;3.98E-01;2.29E-01
OR2K2	-1.75214	0.635415	4	TGAACAGGTGCGTCTGTGCA;CCATGAAAGAGAGATTTCCA;GCGTTGTCAGATACATTACA;TCGATGAGATTCCCACAGAG	-4.19;-1.25;-0.92;-0.65	4934;56407;61140;64498	6.79E-01;6.29E-01;3.83E-01;3.18E-01	12944;16302;21035;72513	4.13E-01;7.81E-01;1.23E+00;1.14E-01
ARHGAP45	-1.29484	0.746385	5	GAGCGACCAAACCATCAAGT;GGGACTTTAAGAAGTTCGAG;CGACAAGGCTCGCTTCCTCG;TCCTGCCTCAGCCTCCCGAG;GTACCCGCTGCTGAACACCG	-3.47;-2.89;-1.61;-0.4;1.89	15990;28692;50871;67218;75714	3.88E-01;4.65E-01;4.77E-01;4.26E-01;4.90E-02	1728;10224;26571;48729;61465	9.92E-01;9.43E-01;7.59E-01;5.37E-01;5.02E-01
ARHGAP44	-2.26682	0.670797	7	TACAGCCTGCAATAGTGTCA;AACAATTTGCAGCGACACTG;TGGTCACACACGCCTCGATG;GCCGAGGCGGGCAGATCACG;GAGGGTCATGGACACAAACT;CAAGGCAGGCAGATCACCTG;TCCTGCCTCAGCCTCCCGAG	-4.83;-3.94;-3.21;-1.91;-1.05;-0.53;-0.4	666;8074;21694;46089;59398;65843;67218	1.24E+00;8.81E-01;6.85E-01;5.36E-01;5.19E-01;4.02E-01;4.30E-01	10224;11599;18045;31359;55748;69375;76775	4.03E-01;6.79E-01;8.15E-01;7.03E-01;4.97E-01;4.24E-01;2.63E-02
ZNF733P	-2.39396	0.518734	4	AATGCCTGGATTGTGCTCAG;CTTGTGGTTAGTAAGTGCTG;ATACTGGAGAGAAACCCTGC;CAAGGCAGGCAGATCACCTG	-3.19;-2.93;-2.92;-0.53	21977;27845;28062;65843	3.80E-01;4.97E-01;9.16E-01;2.82E-01	11599;49397;49615;55446	4.34E-01;4.95E-01;4.23E-01;5.80E-01
CASQ1	-1.61647	0.719465	4	AGACAAGCCCAATAGCGAAG;GAGAACCTTGCTGTCGAAGG;GCTAGGGACACCCAAGTCAG;CTCACAAAGACAATTTGAGA	-2.64;-2.29;-0.81;-0.73	33910;40050;62613;63510	5.07E-01;4.27E-01;3.93E-01;3.45E-01	13932;14829;37392;43512	4.01E-01;8.42E-01;6.33E-01;1.00E+00
ARHGAP40	-1.20307	0.795158	4	TGTCAAGGGGCACACCAAAG;TCAGCCGTGAGCAAAGGTGT;CCAAACCATTACCTTGACCC;TGGCGACTCCGGTATGAAGG	-3.83;-1.57;-0.46;1.05	9642;51473;66587;74666	4.76E-01;5.26E-01;4.48E-01;6.34E-02	2776;10855;25969;67800	8.91E-01;1.06E+00;9.99E-01;2.31E-01
ARHGAP42	-2.023	0.649735	9	TCACATCACTGCGTAGGACC;AATAGCAATGTGTACCCTAA;AAAGGAGTCTCATTTACAAG;TTAGGACTCTACCGAATAGG;GCCGAGGCGGGCAGATCACG;TGATGATCAAAACTACAGGG;GTTTCTGTTTACTTAAGACA;CAGGTCACGAAAAAGAACAC;TCTGCGAATCAACAGGAGAC	-3.66;-3.14;-2.95;-2.46;-1.91;-1.83;-1.13;-1.12;0.0	12439;23136;27400;37163;46089;47465;58086;58298;70582	4.48E-01;5.72E-01;5.67E-01;5.95E-01;5.97E-01;5.88E-01;5.22E-01;6.39E-01;3.63E-01	6635;19144;19356;29981;31359;40298;50062;54320;65003	4.24E-01;5.21E-01;6.32E-01;6.11E-01;7.64E-01;7.35E-01;6.73E-01;8.03E-01;6.84E-01
NLGN1	-0.690592	1.83647	8	GCCGAGGCGGGCAGATCACG;AATGTTAGGAGTGAACCAAG;GGAATCTCACTCTGTCACCC;CAAAGTTGGTAGCCACCAGT;CAAGGCAGGCAGATCACCTG;AAGTTATTAGTAAACCACAC;GAGAATCGCTTGAATCCGGG;TAAAAGGCATAGAAGTACGT	-1.91;-1.63;-1.53;-0.55;-0.53;-0.37;0.44;0.56	46089;50474;52067;65631;65843;67527;73043;73454	2.07E+00;1.67E+00;1.19E+00;1.71E+00;1.08E+00;6.95E-01;5.20E-01;1.84E-01	3988;4399;9915;11599;11811;25378;26968;31359	5.46E-01;1.20E+00;1.23E+00;1.74E+00;2.55E+00;1.80E+00;2.49E+00;3.14E+00
PCBP1-AS1	-1.32533	0.776851	3	GCCGAGGCGGGCAGATCACG;GGAATCTCACTCTGTCACCC;CAAGGCAGGCAGATCACCTG	-1.91;-1.53;-0.53	46089;52067;65843	5.34E-01;3.52E-01;2.11E-01	11599;25378;31359	4.88E-01;6.64E-01;1.18E+00
AGAP12P	-1.12971	1.05118	6	GGTGACTGTTGAAGTTGGTG;GCCGAGGCGGGCAGATCACG;GTGGGAGGAACACTGAACTG;GGTGTCAGCATGATTCTCCG;TTTCTTCATAATGTGCACGG;CGTGACCGGGAGATGCCTGA	-2.3;-1.91;-1.87;-1.56;-1.0;1.87	39965;46089;46721;51575;60008;75689	1.09E+00;8.45E-01;5.62E-01;4.83E-01;4.23E-01;5.96E-02	1753;17434;25860;30704;31359;37485	9.17E-01;5.62E-01;6.57E-01;8.70E-01;1.41E+00;1.89E+00
TNNT1	-1.16291	0.918064	4	AGCGTGGTAAGCGGCAGACG;AAGAGGAACGCCCCAAACCA;CGAACGTCAGGCTAAGCTGG;TCGATGTACATTTCGAGCAG	-4.18;-1.19;0.06;0.65	5051;57315;71256;73731	6.71E-01;6.54E-01;6.04E-01;8.53E-02	3711;6186;20127;72385	7.81E-01;1.49E+00;1.28E+00;1.17E-01
CDC42EP3	-1.47058	0.750651	4	GGATCCTCCAATGGTCGGGA;GTGGCGAAAGTCTCCAAGCG;GAGAATGGGACAGTCCACCA;GGAAGAACTCATTATGCCCA	-2.85;-1.52;-1.15;-0.36	29595;52143;57807;67606	4.43E-01;5.37E-01;3.75E-01;2.36E-01	9836;19635;25299;47847	4.71E-01;6.68E-01;1.03E+00;8.36E-01
CDC42EP2	-3.29995	1.0108	4	CTGAAGCGTGGCAGTCGCAA;CATGATCAGCCCACCGCTGG;GAGCTCCCGCCCACACACGG;GGGGTCCACCGATAACCGGG	-4.34;-4.03;-2.49;-2.34	3523;6848;36722;39168	8.01E-01;1.41E+00;6.49E-01;1.18E+00	38288;40722;70594;73919	5.92E-01;4.28E-01;5.72E-01;8.09E-02
CDC42EP1	-1.14629	0.94469	4	AAAGCCGCATGACCGAGACC;GCCAACCACGAGGCTGTCGT;CATGATCAGCCACCCACTCG;TCCTTCCTCAGCAACCACGG	-2.07;-1.66;-0.87;0.01	43712;49957;61850;70931	7.29E-01;5.02E-01;3.87E-01;1.53E-01	6511;15592;27485;33730	5.88E-01;8.09E-01;9.38E-01;1.44E+00
CDC42EP5	-2.64804	0.693764	5	TCCGGCACACGCTGCACGTG;GTGTGCCGGAAGTCGCCGAG;CAGGAACGAGGTGTCCCCGA;GCCGAGGCGGGCAGATCACG;TCGTTCCTGAGCCGCCACGG	-4.62;-2.86;-2.27;-1.91;-1.58	1574;29343;40404;46089;51326	1.03E+00;4.63E-01;4.88E-01;5.95E-01;8.93E-01	26116;31359;37038;48101;75868	4.88E-01;4.62E-01;5.26E-01;5.50E-01;4.46E-02
CDC42EP4	-3.24472	1.16717	5	TTCCGCCACACCATGCACGT;CTCCAAGCGCCGTTCCCGAG;CGCATGCTTCAGCCCGTACG;GCCGAGGCGGGCAGATCACG;CCCGCGGCCCCATTCCGACG	-4.44;-4.23;-3.83;-1.91;-1.82	2746;4518;9701;46089;47588	8.14E-01;1.55E+00;1.82E+00;5.95E-01;1.06E+00	29856;31359;67749;72929;74696	5.61E-01;4.62E-01;9.79E-01;6.40E-01;7.84E-02
GPRC6A	-3.3463	1.00595	4	TCTTACCTGGAGTCAAACTG;AATTCAATCTAAATGCTCCA;GCACATAGTGCTCCTAACAG;GATCCCGAATGGCATAACCA	-4.15;-3.5;-3.27;-2.47	5342;15455;20292;37032	6.52E-01;8.15E-01;1.27E+00;1.28E+00	40387;57154;62006;72111	6.41E-01;6.49E-01;3.88E-01;1.24E-01
TBKBP1	-1.96968	0.497109	4	CCAAACCACAGATCTGACGC;TGATCTCGTAGACTTTGAGG;GTCGGAGCGAGACATGGCGT;ACATGTCGCCCCCAAGCGAG	-3.73;-1.99;-1.88;-0.27	11210;44827;46630;68393	4.41E-01;4.48E-01;4.59E-01;2.16E-01	9049;30812;32615;66247	4.92E-01;4.63E-01;7.62E-01;2.71E-01
ABI2	-1.54394	0.616888	4	TGCCTATCTGATAAACACCT;CATACTCCCCCAACAATAGG;TTACCTGGAAAGACACTGGG;ACGAACTGGTCGTTCAAGGT	-3.32;-2.99;-1.53;1.66	19068;26503;52109;75491	3.75E-01;5.17E-01;3.99E-01;4.43E-02	1951;25333;50915;58357	1.03E+00;5.37E-01;4.10E-01;4.92E-01
ABI3	-1.35091	1.03368	5	CCTGTCTCGAAAGAGCATCA;CGGGCACACTCTGCGCATGT;TCAGGCCACAGACAAGCGGA;GCGATGACCTTCTGGCCGGG;CAAGGCAGGCAGATCACCTG	-1.77;-1.66;-1.49;-1.29;-0.53	48245;49974;52650;55639;65843	1.20E+00;7.31E-01;4.92E-01;4.26E-01;3.52E-01	11599;21803;24792;27468;29197	4.07E-01;5.32E-01;8.19E-01;1.29E+00;2.12E+00
LOC100420788	-2.46081	0.472012	3	GGCACCTCCTGTAGAGCCAC;AGAGAAGTCCCTCTCCAGTG;GAGGCCGGTGGCTCTACAGG	-3.09;-2.59;-1.69	24146;34700;49459	3.54E-01;4.78E-01;5.84E-01	27989;42763;53311	3.54E-01;3.88E-01;4.86E-01
ABI1	-3.69277	1.39979	4	TCGCCACCCACTATTGGACC;GTTGTGTCGAGATATCTGCC;GTTTCCGAATATACCTTACA;GAGTTACCAGAACCTGACTC	-4.47;-4.05;-3.63;-2.62	2498;6611;12965;34115	9.32E-01;1.44E+00;1.81E+00;1.42E+00	43327;64475;70837;74947	7.18E-01;9.33E-01;5.83E-01;5.69E-02
TESC	-2.29226	0.488803	4	TCAGCTGCTTAAATCTCCGA;TCCCGTAGGAACCTGCGCAA;TCTGTTCCACATGTACGACT;TGCCAATCTTACCGAATGGT	-3.99;-3.14;-1.03;-1.01	7289;23134;59640;59909	5.53E-01;5.80E-01;3.77E-01;4.46E-01	17533;17802;54322;70153	3.78E-01;7.26E-01;3.85E-01;1.72E-01
OTP	-1.14224	0.9163	4	GCCGGGCGCACGGAACACGT;CACCACAGTGGGCTCTACTC;AGGCCTGCCTCAGTTCCCGT;CCCCGACATCTTTATGCGTG	-3.31;-2.31;0.47;0.59	19314;39735;73124;73534	3.75E-01;4.27E-01;7.26E-01;8.99E-02	3908;4318;37707;58131	7.62E-01;1.78E+00;6.25E-01;4.98E-01
PITPNC1	-2.0096	0.592273	6	ACAACAGCTCTAGCCCAACT;AGCCATGAACAGAGTGACCG;CCCTTTGAGGACCCTCACCA;GCCGAGGCGGGCAGATCACG;CAAGGCAGGCAGATCACCTG;AGTGGAACAATTTGTACACA	-3.26;-3.26;-3.12;-1.91;-0.53;0.02	20505;20513;23640;46089;65843;71009	4.67E-01;5.12E-01;7.19E-01;5.11E-01;3.99E-01;2.26E-01	6433;11599;31359;53780;56929;56952	4.91E-01;7.55E-01;5.53E-01;4.87E-01;4.67E-01;8.01E-01
KRT39	-2.07878	0.542915	4	CTGGACTTGTGCCTCTAGGT;ATGTCAATATGAGCCCATCA;ATGGGCTTGCGACAAAAGCG;GGTAATCAGGACATAGAACA	-3.36;-1.95;-1.54;-1.46	18228;45456;51863;53217	3.76E-01;4.53E-01;4.01E-01;6.52E-01	24225;25579;31986;59200	3.91E-01;5.32E-01;7.81E-01;4.67E-01
PARG	-2.68507	0.730044	5	CAGCAAGTCTTGCGATCCTG;CACACAGTAACTATTCGGGT;GCCGAGGCGGGCAGATCACG;AAGTGAACCCGAGTCACCGA;CACTAAAGGAATCAAGACAG	-4.29;-3.94;-1.91;-1.78;-1.5	3914;8086;46089;48164;52439	6.87E-01;1.11E+00;4.62E-01;5.48E-01;8.47E-01	25003;29285;31359;69364;73525	4.69E-01;4.64E-01;6.29E-01;4.74E-01;1.13E-01
ZBED5	-1.51765	0.748657	4	TGTAGACTGAAAATTTGCGA;ATGTCTTCGAAGCTTACTAG;TCTTTGCAAAGTAATGCTAC;AGTTACCATATAGCGCTGAG	-3.76;-1.0;-0.81;-0.5	10783;60006;62622;66188	4.50E-01;7.38E-01;3.93E-01;2.73E-01	11254;14820;17436;66657	4.40E-01;8.43E-01;1.45E+00;2.61E-01
KRT31	-2.11273	0.462513	4	TAAAATAGGACTGGTAACTG;CACCCGATTCAGGTCCACAG;GGAGCAATGGTTCACCACGC;CTCCTTCAATGGTAGCGAGA	-3.64;-3.39;-1.16;-0.26	12738;17632;57731;68504	4.16E-01;7.32E-01;3.75E-01;2.13E-01	8938;19711;59788;64712	4.95E-01;6.66E-01;3.77E-01;3.12E-01
KRT32	-1.62503	0.671591	4	GGACCGCCTTAACATCGAGG;AGGAGTCATGGTGAGCACCT;CCTGGCCAGCTACCTGACGA;CCTACAGATTCTGTGTACCA	-2.98;-1.9;-1.04;-0.57	26652;46247;59462;65421	4.11E-01;4.59E-01;3.76E-01;2.93E-01	12021;17980;31195;50771	4.27E-01;7.20E-01;8.07E-01;7.33E-01
KRT35	-2.45433	0.505891	4	GTCCTACTTCCGGACCATCG;GTACATTGCGGACACACGAG;ACTCGGTTCAGGTCAACAGG;GACTGGTTGGACACCCAGGT	-4.09;-3.11;-1.64;-0.97	6021;23854;50297;60430	6.13E-01;5.64E-01;4.16E-01;4.31E-01	17011;27145;53588;71422	3.79E-01;5.07E-01;3.89E-01;1.41E-01
KRT34	-2.32673	0.522909	5	GGTGGACACTGCCCCCACTG;CGGACATCAACAGCATACGC;TCTGGTGGAAATTAACCGCA;CTTGCTTCTGAAGTCGTCAG;TGAAGTAGGACTGGTAGCTG	-3.34;-3.27;-3.05;-1.21;-0.76	18658;20160;25260;56935;63246	3.98E-01;5.62E-01;8.03E-01;4.12E-01;4.40E-01	14196;20507;52207;57277;58775	3.90E-01;5.55E-01;4.88E-01;4.09E-01;5.99E-01
KRT37	-1.44765	0.690217	4	TGTCACATTCCCGGCAACAT;GTCCTACTTCCGTACAATCG;ACGCCAACAGAGTCCGTGTG;GGCTGGCACCCAACATCGAT	-4.47;-1.88;-0.6;1.16	2472;46614;65047;74874	9.36E-01;4.63E-01;4.21E-01;5.86E-02	2568;12395;30828;74970	9.21E-01;9.65E-01;8.18E-01;5.63E-02
KRT36	-3.25694	1.38249	4	TGTACTCCGTTGCCAACTTG;GGAGCCCACAGAACGGATGG;CTTCTGCTGGAAATCTTCGA;GGATATGAGATGCCAGTACG	-4.6;-4.41;-3.81;-0.2	1678;2924;9901;68995	1.09E+00;2.10E+00;2.14E+00;2.01E-01	8447;67532;74518;75764	5.11E-01;1.13E+00;8.71E-01;3.80E-02
IL21	-1.11061	0.962702	4	GAAAAATTATGTGAATGACT;CAAATACAGGAAACAATGAA;TAGTTGGGCCTTCTGAAAGC;GTTGACGCATTCTAATCATG	-2.95;-2.8;0.52;0.79	27337;30640;73320;74110	4.17E-01;4.65E-01;7.43E-01;7.64E-02	3332;4122;46802;50133	8.21E-01;1.82E+00;4.57E-01;7.55E-01
IL20	-1.9413	0.552611	4	TGGTAAGAAAGGAATTGGCG;TTGACATCAGAATCTTAAGG;CCGGAGAGTATAATGGTCAG;TTCTGAGATACGGGGCAGTG	-3.74;-3.71;-1.12;0.8	11087;11566;58300;74138	4.43E-01;1.01E+00;3.75E-01;7.57E-02	3304;19142;65876;66337	8.25E-01;6.82E-01;4.34E-01;2.69E-01
IL22	-2.17432	0.548077	4	GTTCCAGCCTTATATGCAGG;ATTGGGGAGAAACTGTTCCA;GGACTTGTCAAGCCTGCAGT;GCGCTGCTATCTGATGAAGC	-2.81;-2.78;-2.55;-0.56	30464;31082;35509;65504	4.54E-01;4.60E-01;6.80E-01;2.91E-01	11938;41933;46339;46958	4.28E-01;4.32E-01;4.63E-01;8.69E-01
IL25	-2.82709	0.876057	4	TGGCCCTACAGGACTCTGGG;CCAAGAATGCAACCACCTGT;GTCTGTAGGCTGACGCAGTG;CAGACTCACTCATATCTCCA	-4.87;-3.86;-2.05;-0.53	564;9250;43969;65861	1.55E+00;1.18E+00;5.00E-01;2.81E-01	11581;33473;68191;76878	4.34E-01;4.42E-01;4.86E-01;1.27E-02
IL24	-2.2225	0.494181	4	GGAGGTTCTGCAGAACGTCT;TTTCAAGTAGAACTCCAGCA;AGAGAAGCAGGGTAAAACCC;GGTTGTTCCCCAGAAACTGT	-3.0;-2.92;-2.26;-0.7	26218;28049;40481;63885	4.07E-01;4.95E-01;5.64E-01;3.34E-01	13557;36959;49375;51213	4.05E-01;4.28E-01;4.25E-01;7.18E-01
IL27	-1.15147	1.03407	5	CCAGCTTGAACCAGGAGCAA;GGAGGTGCCGCTGCAGATCG;GGCATGGAAGGGCTGAAGCG;TCCTGCCTCAGCCTCCCGAG;CATTAGGGGGACTTACAAAG	-2.99;-1.34;-0.93;-0.4;-0.1	26592;54958;61054;67218;69742	4.96E-01;9.09E-01;6.59E-01;4.26E-01;2.27E-01	7700;10224;16388;22484;50850	4.85E-01;9.43E-01;1.23E+00;1.60E+00;9.13E-01
IL26	-2.34618	0.603764	4	CTCTCTATATCAAAGCAGCA;CAAGAAAATACGCTTTGTGG;TCACCAAAAGTTGTTACCCA;TTTGGTCAACTGCAATTGCA	-4.0;-3.96;-1.74;0.32	7193;7754;48692;72571	5.57E-01;1.31E+00;4.33E-01;1.13E-01	4871;28750;69681;70246	6.84E-01;4.86E-01;5.35E-01;1.69E-01
EPX	-1.34238	0.917789	4	TGGAGACAAACTGTACAATG;CTCCAATGTGGACCCACGGG;AGTACCGCACCATCACTGGA;GAGAGACTGACCTCCGACCG	-2.42;-1.09;-0.97;-0.88	37877;58653;60464;61657	5.84E-01;6.93E-01;3.79E-01;3.96E-01	15785;16978;18789;39565	3.86E-01;7.55E-01;1.36E+00;1.17E+00
LOC105371792	-0.219995	0.95518	1	AATCGTAGTAAAGCCAAGGA	-0.22	68856	0.051	8586	0.955
CLINT1	-0.985737	1.3163	6	GCAACGAACGATGATCCTTG;ACACCATCAGCAAGTTCCGG;ACTCGCCACTGGAAGCAACA;CAAGGCAGGCAGATCACCTG;TCCTGCCTCAGCCTCCCGAG;AAAGCATATTCATATCACAC	-3.55;-0.88;-0.87;-0.53;-0.4;0.32	14361;61727;61851;65843;67218;72564	3.99E-01;1.79E+00;1.08E+00;7.55E-01;4.09E-01;1.70E-01	4878;10224;11599;15591;15715;63095	5.64E-01;8.29E-01;1.38E+00;1.80E+00;2.78E+00;5.34E-01
LOC105372462	-1.91411	0.392609	1	GCCGAGGCGGGCAGATCACG	-1.91	46089	0.225	31359	0.393
C4B	-1.92991	0.600365	7	AGCTACGTCAGGGTTACAGG;CAGGCCATGGATCTCCCACG;GCTCAATAGACAGAAACCCG;TCCCACAAGCCCCTCAACAT;TGCCAAGCAGTACCGGAACG;AGAGTGTCCCCAACACGAGG;TCCTATGTATCACTGGAGAG	-4.04;-3.2;-2.85;-1.46;-1.09;-0.62;-0.25	6661;21791;29477;53150;58750;64930;68610	4.55E-01;4.97E-01;5.47E-01;6.20E-01;5.12E-01;4.06E-01;3.68E-01	8832;12512;18692;24292;47943;55646;70784	4.13E-01;6.44E-01;7.88E-01;9.60E-01;5.57E-01;5.67E-01;2.73E-01
SLC22A7	-1.3557	0.833484	4	TGGTAGAGGAGAATTCTGAG;CCTGTCGGACAGATATCCAA;AAACATTACATAGCTGACGG;TCTCCCCAACACCACGTTGG	-2.15;-1.93;-1.34;0.0	42343;45884;54862;70839	6.91E-01;4.56E-01;3.82E-01;1.55E-01	6834;22580;31558;35099	5.73E-01;5.92E-01;7.95E-01;1.37E+00
AHRR	-2.58198	0.68837	6	CTGTGCGAATCGGAACTGCA;GTGAGTTACCGAAACCTGAG;GCTGTCGCTGTTCTGCATTG;AGGAAGGCCGAGTACTCGGT;CATTTATGACTACATCCACG;CAAGGCAGGCAGATCACCTG	-4.61;-3.34;-3.32;-2.88;-0.82;-0.53	1630;18858;19281;28911;62482;65843	9.45E-01;5.36E-01;8.84E-01;9.41E-01;4.02E-01;4.23E-01	11599;14960;48515;58147;58584;75812	3.99E-01;6.25E-01;5.91E-01;5.29E-01;4.41E-01;5.54E-02
SNX31	-2.39849	0.535075	5	GAAAGAAGACAGTCAAACAA;TAGTCTTGGAAGTTCTGAGG;CACTGCTGAAAGAGTCCTAG;TCTGGCAATGACCACAGCTA;CAAGGCAGGCAGATCACCTG	-3.46;-2.87;-2.6;-2.53;-0.53	16177;29197;34547;35921;65843	3.88E-01;4.64E-01;5.65E-01;9.06E-01;3.52E-01	11599;41505;42873;48221;61280	4.07E-01;5.42E-01;4.71E-01;5.47E-01;5.08E-01
SPATA31B1P	-2.68659	0.599232	3	AGGAGTCGGAAAGGAACTTG;TGAGGGGCGTTCTAGGAGAA;CTGATGGCCAGAATGTCGTG	-2.9;-2.79;-2.36	28402;30759;38883	3.55E-01;5.45E-01;8.98E-01	38576;46708;49046	4.24E-01;3.63E-01;5.95E-01
LOC105371799	-1.91411	0.392609	1	GCCGAGGCGGGCAGATCACG	-1.91	46089	0.225	31359	0.393
LOC105374155	-1.51247	0.488813	1	GACCGGACACTCGAAGAGCG	-1.51	52314	0.17	25128	0.489
EIF4EP2	-2.32619	0.309199	1	GAAGATGAGAAAAACAAACG	-2.33	39454	0.293	37999	0.309
EIF4EP3	-3.78887	0.876134	1	AAACTTGGCAAGCAAACCTG	-3.79	10300	0.876	67132	0.062
ADCY6	-2.25415	0.459133	4	ATAGATCCCAAGCATCAGGG;TTGGCCTGGCAACTTAACCG;GATGACGCCTTCATCCGGAG;AACACTGCAGTACCTGAACG	-3.61;-3.12;-1.19;-1.1	13385;23617;57223;58599	4.08E-01;5.69E-01;3.75E-01;4.84E-01	18843;20219;53842;64060	3.75E-01;6.51E-01;3.88E-01;3.30E-01
ADCY7	-1.95042	0.627619	5	AGAGGCACCAGAATGTCAGG;TGTACGTCGAGTGTCTCCTG;CCGTAGCCGGGTGCACATCA;GCGTGGGTAGGCAGCGACAC;CAAGGCAGGCAGATCACCTG	-4.11;-3.69;-0.81;-0.61;-0.53	5820;11886;62637;65002;65843	5.61E-01;8.45E-01;7.14E-01;3.99E-01;3.52E-01	11599;12440;14805;65567;71621	4.07E-01;8.16E-01;1.34E+00;4.05E-01;1.70E-01
ADCY1	-3.25118	0.947031	4	CATGTTCAGATCCACCTCGG;CGGGGTGGTGTAGACAACGT;AACCGGGTTACGGACATGAG;CCCAGACGAAAGGACCACCA	-3.85;-3.78;-3.09;-2.28	9307;10454;24137;40247	4.85E-01;1.09E+00;1.08E+00;1.14E+00	37195;53321;66974;68147	5.69E-01;5.59E-01;4.56E-01;2.22E-01
ADCY2	-1.07248	1.25015	6	ACTCCAAGTACCGGGTCATG;CAGGCAGACGCTAAGCACGA;GGAATCTCACTCTGTCACCC;CAAGGCAGGCAGATCACCTG;CCTGTAATTGCATCAAGTCG;TGAAGCGGCATACAAACGTG	-2.06;-1.77;-1.53;-0.53;-0.37;-0.18	43873;48238;52067;65843;67520;69226	1.28E+00;9.29E-01;6.70E-01;7.55E-01;4.12E-01;2.92E-01	8216;9922;11599;25378;29204;33569	4.40E-01;8.47E-01;1.38E+00;1.11E+00;1.55E+00;2.18E+00
ADCY3	-2.02177	0.534876	6	CCACGGAGATGATCACGATG;GTCGATGAGTATCTCGACCA;AGCTGTCTCCAGTACTACAC;GCCGAGGCGGGCAGATCACG;CAAGGCAGGCAGATCACCTG;TCTCTTCTAGGTAATCACAG	-4.12;-2.82;-2.75;-1.91;-0.53;0.0	5758;30233;31708;46089;65843;70551	5.18E-01;5.01E-01;5.49E-01;5.11E-01;3.99E-01;2.43E-01	6750;11599;31359;45734;47186;71679	4.80E-01;7.55E-01;5.53E-01;5.14E-01;7.06E-01;2.01E-01
ADCY8	-2.11787	0.534267	6	CAAAACACGATGTTGACATG;GCTGCAGGTCATCCTCCAAG;CGATATTTAAGATGGCACCC;GCCGAGGCGGGCAGATCACG;ATTTCCAGGACAACAAACCG;CAAGGCAGGCAGATCACCTG	-3.57;-2.89;-2.84;-1.91;-0.96;-0.53	14097;28642;29702;46089;60659;65843	3.98E-01;4.90E-01;5.78E-01;5.11E-01;4.16E-01;4.23E-01	11599;16783;31359;47742;48781;63345	3.99E-01;5.76E-01;5.53E-01;4.97E-01;6.57E-01;5.24E-01
ADCY9	-1.40681	1.17007	9	GATATCGGGTCAGAGAGCCA;GCTACCACGTCACTGCATCG;GCCGAGGCGGGCAGATCACG;GGAATCTCACTCTGTCACCC;TCGCCCAAGCTAGAGTGCAG;GGGAGACTGTTACTACTGCG;CAAGGCAGGCAGATCACCTG;TGTACGCCCGGCATTACGCG;TCCTGCCTCAGCCTCCCGAG	-3.4;-2.07;-1.91;-1.53;-1.41;-0.93;-0.53;-0.47;-0.4	17442;43571;46089;52067;53961;60974;65843;66493;67218	5.80E-01;1.46E+00;1.11E+00;1.01E+00;7.57E-01;7.16E-01;5.86E-01;4.25E-01;5.53E-01	10224;10949;11599;16468;23475;25378;31359;33870;60021	4.17E-01;6.06E-01;9.72E-01;1.11E+00;1.12E+00;1.50E+00;1.64E+00;2.17E+00;9.96E-01
NUCKS1	-2.09705	0.587388	5	TAAACAGAGAGAGATGCTCA;ATAAAAATGTGCGCCAACAA;GCCGAGGCGGGCAGATCACG;CTTCACATACTCTCCTGGAA;AAGGATGATTCTCACTCAGC	-4.24;-3.94;-1.91;-0.2;-0.19	4395;7979;46089;69019;69128	6.49E-01;1.12E+00;4.62E-01;4.65E-01;2.47E-01	8314;8423;31359;69457;73047	4.67E-01;1.08E+00;6.29E-01;4.77E-01;1.27E-01
DDI2	-2.99245	1.04226	9	ATACTACTGAAATCTATTCG;CTTGTTGTAGATCGTCTATG;AGAATATCTTTGTAACATAG;GAGATGAAATTTGAGGCCCT;TGGATTGCGTTCCTTCAGCA;TCAATGCGATCTGAGTCACT;GCTGGATTGTCCAAGCCCTG;GGAATCTCACTCTGTCACCC;TCAATCAGAAACCATAGCTG	-4.54;-4.25;-3.62;-3.42;-2.91;-2.7;-2.49;-1.53;-1.47	2000;4311;13116;17088;28346;32632;36546;52067;52964	7.25E-01;1.13E+00;8.73E-01;1.07E+00;8.74E-01;1.04E+00;1.28E+00;9.10E-01;1.49E+00	24478;25378;40896;44786;49080;60326;64335;73133;75442	8.66E-01;6.20E-01;8.64E-01;7.26E-01;6.35E-01;6.93E-01;5.50E-01;4.99E-01;1.02E-01
DDI1	-2.16227	0.497955	4	TCACTTGTCCAAAACTCTCG;CCTCAAAGATGGCGATATCG;TGATCTGGATCTCTTCGACG;ATGCCACTGAAGTCTACACG	-3.22;-2.39;-1.91;-1.14	21394;38461;46157;58073	3.78E-01;4.26E-01;4.66E-01;5.00E-01	19369;31285;38993;56023	3.75E-01;4.59E-01;5.96E-01;5.62E-01
XRCC1	-2.6827	0.689314	5	CAGGCCCAAACATGCGAACG;ATGAGAGCGCCAACTCTCTG;TGATGGCTCAGCTTTCGTGG;CCCACTCCTTACGCACGATG;GGAATCTCACTCTGTCACCC	-4.42;-2.69;-2.39;-2.39;-1.53	2881;32798;38427;38436;52067	7.96E-01;4.64E-01;5.08E-01;8.16E-01;8.62E-01	25378;39006;39015;44624;74562	4.75E-01;5.08E-01;5.02E-01;6.32E-01;8.23E-02
HOXB-AS3	-2.49722	0.818599	8	GCTCTATTCGTCGGGCTATG;CAATTTCACCGAAATAGACG;TCTTACGGCTACAATTACAA;TGCGCGCAGTCCGACTTCCG;AATTTAGCAACTGATAGTCC;GAAGCCGCTTGCCTGAAGCG;AGAGCAGAAGTGCTCCACTC;CTTCTACCGCGAGAAAGAGT	-4.45;-4.33;-4.2;-2.5;-2.08;-1.41;-0.87;-0.12	2591;3608;4840;36485;43446;53847;61808;69618	6.76E-01;1.34E+00;2.00E+00;5.69E-01;5.80E-01;5.32E-01;4.77E-01;3.70E-01	7824;15634;23594;33996;40957;72608;73834;74851	4.16E-01;5.30E-01;5.89E-01;5.89E-01;6.16E-01;1.13E+00;5.74E-01;1.18E-01
XRCC3	-3.50309	1.171	4	AGGAGCCGTCTACATCTGCA;GAAGCAGCATCCTTACAGGT;CAAACTGAAATCGGTAAAGG;TCAGCAAGTGCCAGACCTCG	-4.13;-3.64;-3.32;-2.92	5680;12756;19151;28024	6.32E-01;9.45E-01;1.34E+00;1.77E+00	49435;58299;64673;71767	9.18E-01;6.82E-01;4.16E-01;1.32E-01
XRCC2	-3.84687	1.8067	4	TGTATACTTCCCAAATCAGA;AGGAACTTCTACCTTCAAGT;GCTCAAGAATTGTAACTAGC;TACTGGATAGACCGCGTCAA	-4.38;-4.35;-4.25;-2.4	3167;3429;4303;38179	8.41E-01;1.97E+00;3.19E+00;1.23E+00	39265;73139;74011;74275	6.14E-01;1.78E+00;8.11E-01;7.25E-02
XRCC5	-2.38684	0.527806	5	TACCTGTCGCTGTACAAACA;AGTAAGAAATATGCTCCCAC;ATCCAAAGCATGAATCAGGG;GAACTATATCACTTCCATAG;TCCTGCCTCAGCCTCCCGAG	-3.56;-2.78;-2.73;-2.47;-0.4	14242;31119;32155;36910;67218	3.89E-01;4.61E-01;6.11E-01;8.70E-01;3.07E-01	10224;40546;45304;46302;63203	4.26E-01;5.28E-01;4.62E-01;5.90E-01;4.41E-01
XRCC4	-2.01828	0.535827	5	ATTGGAATGATGTTCAAGGA;TGGAGACTGATCTTTATAAG;TTAAACGTGTATACATCAGC;ATGGTCATTCAGCATGGACT;CAAGGCAGGCAGATCACCTG	-3.38;-3.3;-2.12;-0.76;-0.53	17816;19740;42819;63181;65843	3.93E-01;5.71E-01;4.71E-01;3.89E-01;3.52E-01	11599;14261;34623;57713;59626	4.07E-01;7.35E-01;5.63E-01;4.06E-01;5.68E-01
XRCC6	-3.676	1.37697	4	CTCCTCTGGGTACACGAACA;TTCCAAGACATGATGGGCCA;TGAGACCTCTTGGTATCGCT;GGTGATCTCCGAGATACAGG	-4.63;-3.64;-3.23;-3.2	1509;12848;21175;21724	1.13E+00;9.40E-01;1.23E+00;2.21E+00	55735;56251;64585;75933	1.20E+00;6.25E-01;4.14E-01;3.42E-02
MEIS3	-1.49479	0.886479	5	CCTCCCAGGTTCGCTCTGAG;TATGTGGATTCGAGACCATG;GAGCAGACGTCACCTCCAGG;AGACAGTGCCCGCAGTACCA;CAAGGCAGGCAGATCACCTG	-4.4;-1.38;-0.62;-0.53;-0.53	2972;54308;64904;65838;65843	7.85E-01;8.82E-01;8.12E-01;4.07E-01;3.52E-01	11599;11604;12538;23134;74470	4.07E-01;8.60E-01;1.53E+00;1.55E+00;8.50E-02
MEIS2	-3.49122	1.21423	4	GGGTTGAGGTTGCATCATCG;CCTTCAAACAGCTAATGTAT;ACGGAGACCCTCACGCGCCG;GACAACAGTGTAGCTTCACC	-3.99;-3.48;-3.31;-3.19	7333;15854;19402;22072	5.51E-01;7.98E-01;1.33E+00;2.18E+00	55388;58025;61585;70110	1.18E+00;6.74E-01;3.85E-01;1.73E-01
MEIS1	-2.2419	0.474944	4	GGTGGCCACACGTCACACAG;ATGCGGGTCCCCATACATCG;GGGTACTGATGCGAGTGCAG;ATCATGATCTCTGTTCCAAG	-3.29;-3.03;-2.59;-0.06	19746;25761;34742;70087	3.75E-01;5.29E-01;7.01E-01;1.73E-01	7355;42719;51683;57696	5.50E-01;4.35E-01;4.03E-01;5.11E-01
PCDHAC2	-1.54753	0.713915	5	CATGTCCACCACATATACGT;CTTTCACATAGAGAGTGCGC;CTTTGGAAACTCCTATACAC;CAAGGCAGGCAGATCACCTG;TTATCGCGTCCAGCTACGGG	-3.33;-2.35;-1.79;-0.53;0.26	19063;39113;47956;65843;72349	4.01E-01;5.10E-01;4.63E-01;4.07E-01;1.48E-01	5093;11599;29478;38320;58380	6.01E-01;8.61E-01;6.75E-01;8.20E-01;6.14E-01
PCDHAC1	-1.11384	1.19516	9	CATGTCCACCACATATACGT;CTGGTGCTTACAGCTCGGGA;CTTTCACATAGAGAGTGCGC;CTTTGGAAACTCCTATACAC;TGACCCTACCATTAGAATCG;CAAGGCAGGCAGATCACCTG;AAGGAAGCGAAAGTTCCGCG;TTATCGCGTCCAGCTACGGG;GGCAGTGGAATCATCCAGTG	-3.33;-3.03;-2.35;-1.79;-1.1;-0.53;0.05;0.26;1.8	19063;25667;39113;47956;58533;65843;71137;72349;75626	6.36E-01;6.27E-01;7.98E-01;8.29E-01;9.57E-01;9.72E-01;8.81E-01;4.64E-01;9.27E-02	1816;5093;6305;11599;18909;29478;38320;51775;58380	7.58E-01;1.01E+00;1.56E+00;1.55E+00;1.45E+00;1.22E+00;1.18E+00;9.24E-01;1.10E+00
CTLA4	-2.74063	0.811533	4	TACCCACCGCCATACTACCT;TTCCATGCTAGCAATGCACG;GCAGATGGAATCATCTAGGA;CCTCACTATCCAAGGACTGA	-3.83;-3.62;-3.57;0.05	9706;13245;14087;71136	4.74E-01;9.19E-01;1.71E+00;1.48E-01	6306;63368;64201;67738	5.98E-01;8.77E-01;4.09E-01;2.33E-01
ESPNL	-0.375218	1.0855	4	GCAGACCGCAGCCCCCCTCG;CCGTGCCGTGAGTCCGATGT;GCACTGGTGATGATCCTCGG;TGGCGGAGTACCATGGACAC	-4.49;-1.02;-0.68;4.69	2337;59764;64204;77215	9.58E-01;7.30E-01;4.09E-01;5.08E-03	227;13238;17678;75105	1.93E+00;9.19E-01;1.44E+00;5.32E-02
HLA-DPA1	-1.3245	0.81794	4	TCTATGCGTCTGTACAAACG;CGTCACGTGGCTGTGCAACG;GCAAAGATAGGGCGTACCGT;GTGGGAAGAACTTGTCAATG	-2.5;-1.72;-1.3;0.22	36382;49117;55584;72147	5.53E-01;4.91E-01;3.79E-01;1.23E-01	5295;21858;28325;41072	6.55E-01;6.09E-01;9.06E-01;1.10E+00
RSL1D1	-3.8104	1.56655	4	AAATGTCTCCCAATGAGTGA;TGATCGAATACTATGAGGCA;ATCCCAATTGCTGACAAACG;GCTATACGTATTGGTCACGT	-4.54;-4.35;-3.27;-3.09	2037;3467;20275;24238	1.01E+00;1.96E+00;1.28E+00;2.02E+00	53231;57143;73975;75404	1.08E+00;6.49E-01;8.07E-01;4.63E-02
PCDHACT	-0.533336	0.82455	1	CAAGGCAGGCAGATCACCTG	-0.53	65843	0.0705	11599	0.825
DDX60	-2.1222	0.555305	5	CTGTTGTTAGTGCAGCACAT;TGTTGTTCGAACATCAATGG;GCTGAAGGAGAGCGACGACG;TCAACCACAAAAGATGACGT;CAAGGCAGGCAGATCACCTG	-3.35;-2.49;-2.13;-2.12;-0.53	18581;36672;42719;42878;65843	3.98E-01;4.85E-01;4.72E-01;6.78E-01;3.52E-01	11599;34564;34708;40784;58844	4.07E-01;4.71E-01;5.62E-01;7.40E-01;5.96E-01
LOC107985840	-1.91411	0.392609	1	GCCGAGGCGGGCAGATCACG	-1.91	46089	0.225	31359	0.393
H2AFY2	-2.5043	0.607308	5	AGCCCCGAGACACATCTTGC;TTACCGACAGTCCAAACCAA;GACTGCCGCCATGTAGACAG;GCCGAGGCGGGCAGATCACG;TATTGGCTCCATGAGAGTGG	-3.34;-2.94;-2.56;-1.91;-1.76	18714;27512;35362;46089;48390	3.98E-01;4.71E-01;5.51E-01;5.95E-01;1.02E+00	29052;31359;42080;49918;58749	5.44E-01;4.62E-01;4.76E-01;5.13E-01;6.00E-01
ADCY10	-2.92441	0.956454	4	AGAAAACAGCCTACGAGCTG;AATGCTTACCTATCTTGACT;TCACAAACACAATCGTCACT;GCACAGGGAATGTTAACGAA	-4.99;-3.83;-1.96;-0.92	321;9576;45352;61152	1.79E+00;1.15E+00;4.78E-01;4.10E-01	16290;32090;67855;77121	3.83E-01;4.52E-01;4.77E-01;7.19E-03
OPN1MW	-0.563853	1.99575	10	CACGGCCTGAAGACTTCATG;CAGAGCACGATGATGCTGAG;GCACGAAGTAGCCATAGACC;TACCTGCTCCAACCAAAGAT;GTTCACAACGCTGATAGTGC;TGCGGCCCAGACGTGTTCAG;GAGCACGATGATGCTGAGTG;ACCAACAGCAACTCCACCAG;GGTAATTCGGGCCTTCGAAG;CAGCGGCAGCTCGTACCCCG	-3.02;-2.42;-2.17;-0.71;-0.4;-0.38;0.07;0.09;0.15;3.16	25800;37912;41993;63834;67167;67389;71306;71427;71773;76604	1.06E+00;1.30E+00;1.09E+00;2.54E+00;2.29E+00;1.59E+00;1.48E+00;8.47E-01;4.33E-01;4.72E-02	838;5669;6015;6136;10053;10275;13608;35449;39530;51642	1.01E+00;8.82E-01;1.50E+00;2.30E+00;2.33E+00;3.19E+00;3.46E+00;1.59E+00;1.94E+00;1.76E+00
KCNA7	-1.19989	0.90137	4	GGATAGCCACAAAATCGATG;TGGAGCCATTCAGCGGAGCG;CATCCTGAGAGTCATCCGAT;TCTACTACTACCAGTCCGGT	-3.26;-1.06;-0.33;-0.15	20586;59135;67818;69450	3.76E-01;7.09E-01;4.76E-01;1.89E-01	7992;9624;18307;56856	5.26E-01;1.15E+00;1.39E+00;5.37E-01
KCNA4	-2.49424	0.514767	4	CCACCACCACCAGTCACGCG;GGCATCAGGTCAGAGCAATG;GGACGACAGGGATCTCGTCA;AGCTCTCTGGATATTCAAAG	-4.1;-2.65;-2.53;-0.7	5926;33577;35994;63964	6.18E-01;4.41E-01;6.68E-01;3.32E-01	13478;41448;43865;71520	4.06E-01;4.30E-01;5.01E-01;1.38E-01
KCNA5	-1.07699	1.0793	4	GGTGAACCAGATGACGCACG;AGATACGCTTCTACCAGCTG;GCAGCCCGGAGATGTTGATG;CGGAGAGCTCTGGGTCCGCG	-1.84;-1.03;-0.83;-0.62	47313;59664;62330;64916	8.42E-01;7.27E-01;3.90E-01;3.06E-01	12526;15112;17778;30129	4.19E-01;8.30E-01;1.43E+00;1.64E+00
KCNA2	-2.62353	0.57103	4	AGATGAAGGCTACATCAAGG;GATGAGAATGAAGACATGCA;TATAGCTATTGTGTCTGTCA;AAATGGCATCAAAGCTAGGG	-3.46;-3.41;-2.55;-1.07	16277;17195;35495;58960	3.83E-01;7.47E-01;6.81E-01;4.74E-01	18482;41947;60260;61174	3.75E-01;4.32E-01;3.79E-01;4.10E-01
KCNA3	-1.88184	0.509093	4	GAGAAGTTCCGCGAGGACGA;GCTGGTGAACCACGGCTACG;TGGGCACGTTGACCGGCCGG;CATGAACCTGATCGACATTG	-3.95;-2.55;-0.93;-0.1	7821;35599;60989;69799	5.32E-01;4.32E-01;3.82E-01;1.80E-01	7643;16453;41843;69615	5.39E-01;7.75E-01;5.38E-01;1.85E-01
MFSD4A	-3.33344	1.05734	4	AGGCCAGCACCTTCACGTCG;TGCCAAAGGAAGAACCTCAG;GCTGGTAAGGATGTACCAGA;CACAGCATAGCTGTACACGA	-3.66;-3.65;-3.37;-2.65	12392;12567;18080;33717	4.21E-01;9.55E-01;1.41E+00;1.44E+00	43726;59373;64886;65035	7.30E-01;7.17E-01;4.19E-01;3.03E-01
LOC101928525	-3.38177	0.807185	2	GGACCACGACATCATCGACC;CACACTCGCTACTTCAGGGG	-3.59;-3.17	13718;22359	5.35E-01;1.08E+00	55081;63710	3.86E-01;1.70E-01
OPTN	-3.01664	0.918065	6	CAAAAAGTTAGAGCTACAAG;AGATTGAAACCCAGACAGAG;TGTGTGGAGATGGCGACTAG;AAACCTGGACACGTTTACCC;GCCGAGGCGGGCAGATCACG;AAGAAATCAAGCATAGTCCT	-4.32;-4.04;-3.48;-2.6;-1.91;-1.74	3691;6739;15820;34519;46089;48708	6.50E-01;1.10E+00;1.07E+00;7.40E-01;7.41E-01;1.21E+00	28734;31359;42923;61600;70712;73753	6.59E-01;5.11E-01;5.21E-01;6.00E-01;4.80E-01;1.27E-01
BHMT	-2.81928	0.690299	4	TGACGTTTGAGCCAGCTCTG;TCAGGAGTGTGGTAAGCCAA;GATAGCATCCGGTAAACCTG;AAGAGGGGCTACGTAAAGGC	-4.22;-3.72;-2.3;-1.04	4644;11378;39893;59481	7.01E-01;1.03E+00;5.77E-01;4.58E-01	17961;37549;66051;72801	3.76E-01;4.27E-01;4.38E-01;1.07E-01
TESC-AS1	-1.52854	0.484514	1	GGAATCTCACTCTGTCACCC	-1.53	52067	0.172	25378	0.485
OPTC	-2.03649	0.466412	4	TAGTAGGTCTGGTCATCGTG;GAAGGCATCATTATCGATGG;TTCAGGACATCATTCCGCAG;TACAGGTAGGCAGTCCTCCG	-3.79;-2.19;-1.66;-0.5	10278;41747;49968;66179	4.61E-01;4.31E-01;4.19E-01;2.73E-01	11263;27474;35695;67149	4.40E-01;5.03E-01;6.75E-01;2.48E-01
MCCC2	-1.61882	0.601998	4	TTGACAATCTCATAGACCCA;TTAGGTCATTGCTAGAATCG;ACTTAACTAGGAAGGTTGTG;GTAGGCACCTCCTTTGACGG	-4.26;-2.78;-0.7;1.27	4179;31029;63923;75026	7.38E-01;4.61E-01;4.06E-01;5.50E-02	2416;13519;46413;73269	9.45E-01;9.05E-01;4.62E-01;9.62E-02
NO_CURRENT_156	-2.45041	0.669509	4	GCTAAGGTCATGTTTGCAAT;GCGGTTCCGGGAGCACATTT;GCGTGCGTCCCGGGTTACCC;GCGTTCCCCCACTGACGGGG	-4.66;-3.65;-1.64;0.15	1340;12696;50287;71779	1.18E+00;9.48E-01;4.16E-01;1.32E-01	5663;27155;64746;76102	6.33E-01;5.07E-01;4.17E-01;3.03E-02
NO_CURRENT_157	-2.26802	0.498561	4	GCTAGTTTCTGTTAGCTCCT;GCTCCCATCCATAGTAAAAA;GCTAGTGTCGTGGGGGATGA;GCTCGCAAGTATTTAAGGAC	-3.13;-2.57;-1.95;-1.42	23352;35164;45535;53743	3.86E-01;4.33E-01;4.75E-01;6.35E-01	23699;31907;42278;54090	3.88E-01;4.53E-01;5.29E-01;6.23E-01
NO_CURRENT_154	-2.15546	0.504116	4	GCGATCGGAGTGCCACGATA;GCGGAATGAACACGAGGTAG;GCGAACCCCGTAGCCAGGCT;GCGAATGCCTGAAAGTATAA	-3.42;-2.27;-1.47;-1.46	16974;40455;52940;53102	3.79E-01;4.28E-01;3.93E-01;6.55E-01	24340;24502;36987;60468	3.92E-01;5.52E-01;6.43E-01;4.30E-01
NO_CURRENT_155	-2.37461	0.763326	4	GCGGGGCGGTGACTTTCAAG;GCGGCGTCTGGGAATCGTTC;GCGGGCAGAACGACCCTGAC;GCGGCGTCATCCACGCGTGC	-4.33;-4.21;-2.07;1.11	3615;4783;43630;74769	7.91E-01;1.70E+00;5.05E-01;6.10E-02	2673;33812;72665;73830	9.06E-01;4.40E-01;6.91E-01;8.30E-02
NO_CURRENT_152	-1.77529	0.671615	4	GCCGCCGATTTCATAAGTAA;GCCCTTCAATGCGTTCCGTA;GCCGTGTTGCTGGATACGCC;GCCGTGGTATCAAGTCGGTA	-2.54;-2.06;-1.82;-0.68	35718;43763;47515;64217	5.40E-01;4.41E-01;4.47E-01;3.25E-01	13225;29927;33679;41724	4.09E-01;4.72E-01;7.31E-01;1.07E+00
MCCC1	-0.989038	1.20844	6	GTCATGATTAAAGCCGTCCG;GCCGAGGCGGGCAGATCACG;CGACCAGCTTCGCAATCATG;AGAAGTTTGTAGACACACCG;CAAGGCAGGCAGATCACCTG;AAGGTCCTCATTGCAAACAG	-1.94;-1.91;-1.39;-1.33;-0.53;1.17	45711;46089;54134;55114;65843;74889	1.39E+00;8.45E-01;7.30E-01;4.95E-01;3.99E-01;8.73E-02	2553;11599;22328;23308;31359;31725	7.77E-01;7.55E-01;7.62E-01;1.22E+00;1.41E+00;2.33E+00
NO_CURRENT_150	-2.10405	0.607836	4	GCCATTCTAGTCCCGGCATA;GCCAGGGTATGGGCATCTCG;GCCCAGACGCCCTAGAATAG;GCCAGGGTTCTTGGTCCCGA	-2.62;-2.38;-2.1;-1.32	34246;38573;43217;55231	5.13E-01;4.26E-01;5.13E-01;5.87E-01	22211;34225;38869;43196	3.81E-01;4.38E-01;5.99E-01;1.01E+00
NO_CURRENT_151	-1.72084	0.674579	4	GCCCCAAGCTAGAACTCAGC;GCCCCTTATGATTGTTATAG;GCCCCGTAAATCTCATTACA;GCCCCGCCGCCCTCCCCTCC	-2.57;-2.14;-1.54;-0.64	35213;42572;51826;64699	5.30E-01;4.35E-01;4.02E-01;3.12E-01	12743;25616;34870;42229	4.16E-01;5.32E-01;6.97E-01;1.05E+00
NO_CURRENT_158	-3.66535	1.59618	4	GCTGAACGCCGACAGGACGG;GCTGGAGAGACAATTCTACT;GCTGCGGCGAGATCACATAA;GCTGATATATACGACAAGCC	-4.83;-4.06;-4.06;-1.71	683;6419;6450;49242	1.46E+00;1.46E+00;2.67E+00;7.87E-01	28200;70992;71032;76757	4.27E-01;1.46E+00;5.93E-01;1.54E-02
NO_CURRENT_159	-3.84411	1.64064	4	GCTTAAGTCACGGCTTTCCA;GCTGTTCCGAAGTTGAGAAT;GCTTAACCTATCCGCCAGTA;GCTGTTGTAACGGTAGATAT	-4.36;-4.31;-3.8;-2.9	3337;3813;10067;28383	8.21E-01;1.88E+00;2.12E+00;1.74E+00	49059;67375;73629;74105	9.04E-01;1.12E+00;7.72E-01;7.65E-02
ACACA	-1.70164	0.713122	10	AATGCATGCGGTCTATCCGT;TATTTGCCTAGGTACCGAAG;CCAGAGTCCCACATTCCCTG;GGGGATTAGGTGACAGCTTG;TGATGGGTCCATGATAACCG;GTCGGCAACTGCTATCTCTG;CAAGGCAGGCAGATCACCTG;ACTGCAGGGTAGCTATAGTC;TCCTGCCTCAGCCTCCCGAG;ATTCCCAGGAGTTATAGAAG	-4.85;-3.75;-3.39;-2.74;-2.29;-2.22;-0.53;-0.41;-0.4;3.57	629;10910;17605;31895;40122;41149;65843;67067;67218;76808	1.12E+00;5.77E-01;6.35E-01;6.02E-01;6.12E-01;6.42E-01;8.88E-01;5.93E-01;4.33E-01;3.56E-02	634;10224;10375;11599;36298;37332;45547;59856;66530;76813	1.12E+00;5.97E-01;9.77E-01;1.40E+00;6.17E-01;7.22E-01;6.90E-01;5.29E-01;4.45E-01;3.54E-02
ACACB	-2.55686	0.563332	5	ACAACGACATCGACACCGGG;AAAGCGTGTGACAAACTCAG;GTCGGAGTCCATAATCCACA;GAACTCGAATATGGCCAGCG;CAAGGCAGGCAGATCACCTG	-4.22;-3.31;-2.54;-2.18;-0.53	4590;19427;35747;41855;65843	6.34E-01;5.77E-01;5.45E-01;7.08E-01;3.52E-01	11599;35587;41715;58000;72856	4.07E-01;4.77E-01;4.78E-01;4.03E-01;1.33E-01
TNK1	-2.6293	0.60916	4	CCCAAACATCCACACGTCCG;CCTCTGGGATCAGACACTTG;AATGGTCGCACCTTCAAAGT;TGGGCCTAAGTCTAAGAACT	-3.45;-3.23;-3.09;-0.74	16455;21040;24153;63403	3.82E-01;6.29E-01;1.08E+00;3.47E-01	14039;53287;56385;60973	4.00E-01;5.59E-01;3.77E-01;4.15E-01
PLA2G2A	-1.38794	0.797568	4	GTAGAAGCCATAACTGAGTG;AAGGATGCAACGGATCGGTG;TACAAACGTCTGGAGAAACG;GCTACAAGTTTAGCAACTCG	-3.83;-1.07;-0.48;-0.18	9722;59065;66450;69192	4.74E-01;7.07E-01;4.45E-01;1.96E-01	8250;10992;18377;67731	5.17E-01;1.05E+00;1.39E+00;2.33E-01
PLA2G2C	-0.7404	1.18383	4	ACGGATATGGCTGCTACTGT;TGGGGATAAAGGGATCCCCG;CCACTGCGCCATTGACGATG;AACTGGTAGCTGTTCAACAC	-1.96;-1.96;0.24;0.72	45272;45351;72253;73924	7.76E-01;4.52E-01;6.62E-01;8.07E-02	3518;5189;32091;32170	8.01E-01;1.63E+00;7.78E-01;1.53E+00
PLA2G2E	-1.94945	0.717432	4	TATGGCTGTTACTGCGGCAT;ATAGTCGTTGTACTGCAGGG;GTGGACCAGACTGACTGGTG;ACAAAGATCACTTACCCAGG	-2.26;-2.13;-1.82;-1.59	40567;42689;47552;51110	6.45E-01;4.35E-01;4.47E-01;7.22E-01	26332;29890;34753;36875	4.08E-01;4.72E-01;7.01E-01;1.29E+00
PLA2G2D	-1.46205	0.801964	4	GGTGTGATTCCAATCCAGGG;ACAGCAGTGGATGTTCCCCT;AGTCCGCAGTGACAGCCGTA;AGAAAGGAGTTACCAGTCCG	-2.58;-1.51;-1.03;-0.73	35034;52341;59623;63516	5.27E-01;5.41E-01;3.77E-01;3.44E-01	13927;17819;25101;42425	4.01E-01;7.25E-01;1.04E+00;1.05E+00
PLA2G2F	-1.68202	0.663899	4	TCATACCCAGGCTAGACCTG;GACAGGAGGCCCCGAAGCGT;GTAGCAACCGTAGCCCACGA;TCTCGATGGTGTGATCATAG	-3.63;-3.06;-0.04;0.0	13068;24969;70181;70785	4.11E-01;5.43E-01;5.54E-01;1.56E-01	6792;7261;52487;64367	5.74E-01;1.36E+00;3.97E-01;3.21E-01
OR8J3	-1.75124	0.534567	4	TAACCCTCTGCTCTACATGG;TGTATCGGAGGTAATGATGC;AGTGCTCTATGTGCTGACCA;TAAGACACAGAGAATATACA	-3.92;-2.76;-1.39;1.06	8276;31522;54283;74683	5.16E-01;4.57E-01;3.85E-01;6.30E-02	2759;23159;45899;69164	8.93E-01;5.79E-01;4.70E-01;1.96E-01
OR8J1	-3.26085	0.958885	4	TGTATCGGAGGTAATCATGC;TAACCCTCTGCTGTACATGG;TCTATGGGCTGACCATGGCA;TATATCTGCAGCAACAAATG	-3.83;-3.34;-3.15;-2.72	9681;18706;22810;32236	4.75E-01;6.96E-01;1.14E+00;1.52E+00	45187;54618;58757;67767	7.73E-01;5.86E-01;3.75E-01;2.32E-01
AATK-AS1	-0.533336	0.82455	1	CAAGGCAGGCAGATCACCTG	-0.53	65843	0.0705	11599	0.825
CYFIP1	-1.95686	0.656115	6	AGGGCATCGACATCTCAATG;CACCGACAAGTACTCCAACA;AATCTACGAGAAAACCGTGG;GGAATCTCACTCTGTCACCC;GCAGATGATCCAGATCCGCG;CAAGGCAGGCAGATCACCTG	-4.55;-1.99;-1.71;-1.53;-1.44;-0.53	1981;44893;49278;52067;53522;65843	8.70E-01;8.03E-01;6.06E-01;4.83E-01;5.34E-01;4.23E-01	11599;23920;25378;28164;32549;75461	3.99E-01;4.86E-01;6.70E-01;9.74E-01;1.34E+00;6.75E-02
CYFIP2	-2.07513	0.590507	9	ACCACGGAGCTGATCGTTCG;TCTTCTCATAGATCTCTACT;ACTGGTGTAATTGTAGCGTG;AGACAAACTGATCAAAACAC;TGAGCCGCGATGGTCTTACA;GATTTGATATCAAGGTGCCC;AGCACCCAAAGGGAGATCTG;CAAGGCAGGCAGATCACCTG;AGCCAGCGGACTCTTATCCA	-4.26;-3.65;-3.54;-2.99;-1.75;-1.49;-0.56;-0.53;0.08	4267;12672;14625;26440;48661;52695;65580;65843;71379	5.01E-01;5.59E-01;7.93E-01;6.73E-01;6.28E-01;5.65E-01;5.79E-01;4.34E-01;3.19E-01	6063;11599;11862;24747;28781;51002;62810;64766;73172	4.35E-01;5.86E-01;9.53E-01;7.17E-01;8.56E-01;5.64E-01;5.28E-01;4.53E-01;2.22E-01
GUSBP4	-1.52854	0.484514	1	GGAATCTCACTCTGTCACCC	-1.53	52067	0.172	25378	0.485
GUSBP1	-0.533336	0.82455	1	CAAGGCAGGCAGATCACCTG	-0.53	65843	0.0705	11599	0.825
LOC107984089	-1.91411	0.392609	1	GCCGAGGCGGGCAGATCACG	-1.91	46089	0.225	31359	0.393
KRTAP29-1	-1.73364	0.618769	4	ACAACAAGTAGATTCCGAGC;AGCAGGATCACAGCCACTTG;AGTTCATGTCAACCCGTCAG;ACCACATACCCAGTTAAAGG	-4.44;-1.31;-1.23;0.05	2696;55366;56686;71144	9.02E-01;6.03E-01;3.76E-01;1.47E-01	6298;20756;22076;74747	5.98E-01;6.37E-01;1.18E+00;6.15E-02
LHPP	-1.08076	1.07373	7	TACCTCAAGCGCCTTCATGT;GTCTCCTTGTAGTAACGCCT;TGTGTGGTAATTGCAGACGC;TCAGCACTTCTGGGCTCAGA;CAAGGCAGGCAGATCACCTG;TCCTGCCTCAGCCTCCCGAG;TCGGGCGTGCTGTACGACAG	-3.07;-2.68;-2.0;-0.89;-0.53;-0.4;2.01	24632;33005;44798;61548;65843;67218;75818	6.50E-01;6.25E-01;6.70E-01;9.18E-01;6.79E-01;4.03E-01;6.44E-02	1624;10224;11599;15894;32644;44430;52810	8.88E-01;7.44E-01;1.21E+00;1.51E+00;1.03E+00;9.73E-01;1.16E+00
NUP188	-2.01768	0.784595	5	TCATGGGAGATCACATCATG;TACCTGCAAGAGGACTACAG;GGTTCAGAAACAGTTCGATG;CAAGGCAGGCAGATCACCTG;TTCAGCACAAACATTACACA	-4.75;-3.77;-3.52;-0.53;2.49	951;10667;14902;65843;76222	1.23E+00;9.15E-01;1.33E+00;4.07E-01;3.45E-02	1220;11599;62555;66785;76492	1.13E+00;8.61E-01;7.11E-01;4.20E-01;2.68E-02
GLT8D2	-3.04833	1.41943	10	AGATGTGGCTGCCAGTGGTG;AGGGTAGCTGATCTTCTGTG;TGATCAGATGTGGCTGCCAG;GATCGCTCTCTTCTGCACTG;CATCTGAGAAAGCCGCCGCG;TCTTATACAGAATCACACAG;CACTACATAGAACAAGATGT;CGACGCCGACCTGAGCCCGG;TCAGGACATAAACAGACTCG;TCCTGCCTCAGCCTCCCGAG	-5.6;-4.2;-4.17;-4.12;-3.15;-2.81;-2.69;-1.84;-1.5;-0.4	3;4814;5142;5728;22989;30450;32804;47222;52562;67218	3.41E+00;9.83E-01;1.66E+00;2.40E+00;1.00E+00;9.78E-01;1.25E+00;8.83E-01;1.01E+00;6.15E-01	10224;24880;30220;44617;46992;54466;71715;72304;72628;77439	4.33E-01;6.79E-01;6.51E-01;8.72E-01;7.10E-01;7.06E-01;1.55E+00;9.42E-01;4.57E-01;1.12E-04
GLT8D1	-2.38086	0.491654	4	TGCAGTAGATGGGAGACAAG;TGGCAAGTAGAACCTTGCAA;AGGATTAAATGAGCAAGTGC;TCTACTAAAGTTGTCATCCG	-3.35;-2.58;-2.25;-1.34	18554;34881;40713;54915	3.75E-01;4.35E-01;5.60E-01;5.97E-01	22527;36738;42554;58870	3.82E-01;4.28E-01;5.24E-01;4.76E-01
OR2C3	-0.6988	1.13994	4	CAAGCCAGTTGCATAATGAG;GAAGAGGACAGTTTCTAGTG;GAGCTGTGGGACAATGCTCG;AGAAAACCATAAGCTATGGA	-1.7;-1.47;-0.9;1.28	49291;52943;61395;75047	9.13E-01;5.52E-01;3.84E-01;5.46E-02	2395;16047;24499;28151	9.49E-01;7.91E-01;1.06E+00;1.76E+00
OR2C1	-1.87135	0.557173	4	CAAATGCTGATCAATTTATG;TGGCGACACAAGTCTCAACC;GGTGGAGGGATTCCTCTGCG;AGCGAAAGCAAGGTCCAAGG	-3.62;-3.04;-0.52;-0.31	13232;25395;65966;68088	4.09E-01;5.35E-01;4.36E-01;2.24E-01	9354;11476;52027;64210	4.84E-01;1.02E+00;4.00E-01;3.25E-01
REG1A	-1.4659	0.709851	4	TAATGAAGACCGTGAGACCT;CTGAGACAGAAACATCAGGC;CTTAATCAGTGAGGCCACAA;GAACATGAATTCGGGCAACC	-2.9;-2.62;-2.35;2.01	28573;34136;39011;75816	4.31E-01;4.38E-01;5.96E-01;3.68E-02	1626;38414;43320;48884	1.10E+00;4.26E-01;5.11E-01;7.99E-01
REG1B	-2.61771	0.638958	4	GAACATGAATTCAGGCAACC;CTTAATCAGTGAGGCCACGA;CCTTCTGGGCAGCTGATTCG;CAGAGACAGGAACATCAGGG	-3.92;-3.89;-1.89;-0.77	8314;8712;46407;63117	5.15E-01;1.22E+00;4.62E-01;3.55E-01	14325;31035;68727;69128	3.97E-01;4.61E-01;5.02E-01;1.97E-01
LOC107984332	-3.6816	1.18381	2	CAGGTTGGTACGATTCAAGG;CCAGGACTGAGCCTTAGGCA	-4.79;-2.57	819;35059	1.68E+00;6.88E-01	42383;76623	3.05E-01;9.22E-03
MRGPRD	-2.50082	0.545253	4	GATGTACTTTGCCTACACAG;GGTGACACTTGAACCAGATA;TCAGCCCTAAACTATTCCAG;TGAAGATCGGTGCTTCAGGG	-3.87;-3.43;-2.73;0.02	9119;16758;32133;70999	4.90E-01;7.63E-01;7.77E-01;1.51E-01	6443;45290;60697;68319	5.91E-01;4.51E-01;3.80E-01;2.18E-01
MRGPRE	-2.84698	0.672437	4	GCCACTTGTGCCGGACGCTG;GGTGAGGGCGCACACACAGG;AAGGAAGATGAGATCCGCGC;CATTCCCCAGCAGCCCACCG	-4.34;-2.91;-2.55;-1.59	3571;28278;35460;51135	7.96E-01;4.92E-01;6.82E-01;7.21E-01	26307;41982;49174;73871	4.08E-01;4.32E-01;4.27E-01;8.20E-02
OSR2	-2.46845	0.498632	4	TGTCCGGAGTCAATTTACTG;CTTAGGCGGATCCTCTTGCG;GGGCCTGTACGGTCTCAGCG;AGGGGAAGCGCGCGTCCACG	-3.64;-3.2;-1.88;-1.16	12853;21717;46687;57746	4.14E-01;6.12E-01;4.58E-01;5.10E-01	19696;30755;55743;64590	3.75E-01;4.64E-01;3.79E-01;3.15E-01
MRGPRG	-2.44385	0.493376	4	CCCCACCGCGAACCACAGGA;GCCAGCCGTCCAGGCGACGC;AGAAGGGGCCCTTCTTGATG;CGTTACCTACCGGTCCCCCG	-3.87;-3.36;-1.98;-0.57	9089;18345;45065;65429	4.91E-01;7.08E-01;4.82E-01;2.93E-01	12013;32377;59074;68341	4.27E-01;4.50E-01;3.76E-01;2.17E-01
TTC39B	-1.32769	0.915724	4	TGCCACCCAAAAACCAAGCA;CTTGGGCTACAGTACCATTG;ACGTGAGTGCAGCTTTCTGT;TATCACATGATGCAAAGTGA	-2.22;-1.26;-1.01;-0.82	41177;56133;59891;62472	6.61E-01;6.22E-01;3.77E-01;3.73E-01	14970;17551;21309;36265	3.92E-01;7.34E-01;1.22E+00;1.32E+00
TTC39A	-1.868	0.662989	7	GCACTCCTCGAAACGCCGGA;TGTACACCTACCGAGCACGA;CTGCATAGCAGACCTCAGCG;GGAATCTCACTCTGTCACCC;AGTATTGTGAGGACTGAACA;CAAGGCAGGCAGATCACCTG;TCCTGCCTCAGCCTCCCGAG	-3.78;-2.71;-2.62;-1.53;-1.51;-0.53;-0.4	10366;32493;34266;52067;52419;65843;67218	4.03E-01;6.13E-01;5.33E-01;5.99E-01;5.06E-01;4.02E-01;4.30E-01	10224;11599;25023;25378;43160;44949;67078	4.03E-01;6.79E-01;6.06E-01;9.11E-01;6.55E-01;9.50E-01;4.37E-01
BPNT1	-3.2885	0.971478	4	GGAACCAAGGAATATACCGA;GTACCTTCTCCACAATACCC;TAATAGCACTGTACTGCGAT;AGTAACCAACTTGTTGCTAT	-4.29;-3.86;-2.56;-2.44	3962;9178;35354;37490	7.57E-01;1.18E+00;6.84E-01;1.26E+00	39952;42088;68264;73479	6.31E-01;4.33E-01;4.89E-01;9.12E-02
ABHD14A-ACY1	-1.68401	1.03673	9	GCTGGACAGTGCGGATACGC;TAGCTTAGTCAGGTTCACGG;CTGGCAGCCCCACATACAGT;GCCGAGGCGGGCAGATCACG;AGGCACAAAGGTCATGTGGA;GGAGGTACAGAATGCCGTGT;AGGCCTTTAACTCTCACACG;CCATGCCTCACGCTTCATGG;TCCCACTCAACCAGGCACAC	-3.2;-2.36;-2.02;-1.91;-1.51;-1.17;-1.08;-0.98;-0.92	21885;38906;44460;46089;52309;57465;58862;60310;61158	7.49E-01;1.16E+00;1.02E+00;7.65E-01;7.07E-01;6.18E-01;5.18E-01;5.70E-01;9.23E-01	16284;17132;18580;19977;25133;31359;32982;38536;55549	5.43E-01;5.14E-01;6.50E-01;9.01E-01;1.02E+00;1.11E+00;1.52E+00;1.77E+00;1.30E+00
LINC00457	-1.52854	0.484514	1	GGAATCTCACTCTGTCACCC	-1.53	52067	0.172	25378	0.485
BCL9	-1.19115	1.10992	5	CGGGAGTCATATGGTCAAGG;AGGTTTCGGATCATTCCGAA;CAAGGCAGGCAGATCACCTG;ATGCTGAAATTACGCCCAGG;TCTCTGATCAAAGGAGTCGG	-4.24;-0.72;-0.53;-0.46;0.0	4441;63616;65843;66630;70501	6.45E-01;1.42E+00;8.61E-01;4.17E-01;2.04E-01	6701;10812;11599;13826;73003	5.21E-01;9.06E-01;1.61E+00;2.38E+00;1.28E-01
BCL6	-3.43218	1.2117	4	CATCTGCAGGTACATAGCCG;AAGTGATATGCACTACAGTG;TCCCTCACCTGCAGGCCATG;CAAGACATCATGGCCTATCG	-4.55;-4.38;-2.6;-2.2	1956;3184;34669;41477	1.03E+00;2.03E+00;7.03E-01;1.08E+00	35965;42773;74259;75488	5.45E-01;4.36E-01;8.39E-01;4.44E-02
BCL3	-1.55461	0.850148	4	CAGGTTCACCAGAGGAAACG;GATCACCACATTACCGTCTG;CTGGAGGCCCGCAATTATGA;CGGTGCCGACATCGACGCAG	-1.89;-1.71;-1.57;-1.04	46445;49192;51421;59419	8.13E-01;4.92E-01;4.05E-01;4.60E-01	18023;26021;28250;30997	3.76E-01;5.25E-01;9.09E-01;1.59E+00
BCL2	-1.27537	0.751049	4	GGCCTTCTTTGAGTTCGGTG;TGGACATCTCGGCGAAGTCG;CTGACGCCCTTCACCGCGCG;TGTCGCAGAGGGGCTACGAG	-3.09;-1.83;-1.42;1.24	24273;47412;53760;74983	3.92E-01;4.71E-01;3.88E-01;5.60E-02	2459;23682;30030;53185	9.38E-01;5.68E-01;8.45E-01;6.53E-01
NPEPL1	-1.75685	0.576317	4	CGGCCGCCCACTTCATCACG;ACCCGCAGACTACCATGCCG;CCAGACACCCACCTGCAATG;GCTTTCCATAGGAATCTATG	-3.39;-3.25;-1.18;0.79	17675;20628;57414;74119	3.77E-01;6.40E-01;3.75E-01;7.62E-02	3323;20028;56795;59759	8.23E-01;6.56E-01;3.76E-01;4.50E-01
CLMN	-3.85191	1.67634	4	CTTCGTTCTGACTGAAAATG;ATTGACCAGGTCCTGCAAGG;CCGAAAAATACGATGCGACG;GTCACCAGCGACCTTGTCAG	-4.61;-4.45;-3.74;-2.6	1624;2597;11066;34575	1.10E+00;2.20E+00;2.00E+00;1.40E+00	42867;66376;74845;75818	7.05E-01;1.05E+00;9.17E-01;3.68E-02
CLMP	-2.22735	0.728843	4	GGCTGCTCACCGATAATGAA;TGTCTACAATAACTTGACTG;AGATGTACAAAGCATCGGCA;TCACACTGAGATCAAGAGAG	-4.59;-3.98;-0.83;0.5	1719;7413;62312;73236	1.08E+00;1.35E+00;3.90E-01;9.70E-02	4206;15130;70028;75723	7.36E-01;8.29E-01;5.48E-01;3.90E-02
OR7E105P	-0.265841	0.935066	1	GATCCTCTGAGAGTCCCAGG	-0.27	68449	0.0536	8993	0.935
MTM1	-1.62526	0.746706	6	TAAAAGTTGCAACTCTCCGG;GGGGAAACGCGTATCTCGTG;GGAATCTCACTCTGTCACCC;ATCCAGTGGAAGAATACAGG;CAAGGCAGGCAGATCACCTG;AGCCTCTTGTCGGTATGAGT	-3.44;-2.97;-1.53;-1.03;-0.53;-0.25	16666;26900;52067;59602;65843;68600	4.15E-01;4.84E-01;6.70E-01;5.54E-01;3.99E-01;3.16E-01	8842;11599;17840;25378;50545;60798	4.28E-01;7.55E-01;9.53E-01;1.11E+00;6.08E-01;6.31E-01
OR7E53P	-2.19477	0.334845	1	CATCGGTTTCACCTCCACCA	-2.19	41613	0.27	35820	0.335
CSNK1G2	-2.80817	0.701531	5	AGCCGATCTTCTTGCCGACG;GTACCGCTCCTTGAGCGTGT;CCAGCCCGAAGTCGATGATG;GCCGAGGCGGGCAGATCACG;ATGGCGTTGTACTTCCCGCA	-4.18;-3.21;-3.02;-1.91;-1.72	5034;21677;25909;46089;49010	6.05E-01;5.34E-01;7.80E-01;5.95E-01;9.93E-01	28432;31359;51546;55788;72408	5.31E-01;4.62E-01;4.82E-01;4.24E-01;1.46E-01
SERPINB8	-1.69972	0.650275	4	AAAGACGGAGATATTCACCG;ATTTGACAGAAAGTACACAA;GCCTGGAGCTTACCACGGCG;GAAGCATATAAATGACTGGG	-2.8;-2.45;-1.05;-0.49	30549;37288;59361;66296	4.56E-01;4.27E-01;3.76E-01;2.70E-01	11146;18081;40154;46893	4.42E-01;7.16E-01;5.71E-01;8.71E-01
LOC107985068	-2.52108	0.583754	5	TGAACACGGGATGCTTCGTG;TCGTTTCAAAGTAACTCTCC;CAAGGGCAGTAACAAGCATG;GGAATCTCACTCTGTCACCC;AGCAGTCAGCACTAGTAGCA	-3.66;-3.48;-3.19;-1.53;-0.74	12395;15763;21940;52067;63469	4.00E-01;6.79E-01;9.33E-01;4.75E-01;4.32E-01	13973;25378;55482;61696;65045	3.90E-01;4.86E-01;5.29E-01;3.88E-01;3.79E-01
CSNK1G1	-2.54249	0.627706	6	TCCCACCATAAGAACCCCAG;AAGTAAATGTTCGGTCACAG;ATGGCATTATATTTCCCACA;AACTTCCTGATTGGTCGACA;TCGCCCAAGCTAGAGTGCAG;CAAGGCAGGCAGATCACCTG	-4.16;-3.97;-3.11;-2.07;-1.41;-0.53	5239;7633;23719;43561;53961;65843	5.44E-01;1.02E+00;7.17E-01;5.41E-01;5.25E-01;4.23E-01	11599;23475;33881;53699;69806;72199	3.99E-01;4.88E-01;5.26E-01;4.87E-01;4.53E-01;1.83E-01
ALOX12-AS1	-0.657776	1.3387	4	CCCCCATATCCGCTACACCA;TGAAGCTCTTCCATCCCCGA;TCCATCTTCAGCATAACGAG;TCCAAATATGAGATTCCATG	-1.87;-0.49;-0.35;0.07	46840;66329;67705;71323	8.26E-01;1.04E+00;4.74E-01;1.43E-01	6119;9737;11113;30602	6.07E-01;1.14E+00;1.99E+00;1.61E+00
SERPINB1	-2.22735	0.559158	4	TCTGAATGGTGCATTCGTCG;CAAGGAAGACCATAAACCAG;AATGCTGATATCAACAAACG;GAGATGAAGATGTTTCCAGC	-2.88;-2.35;-2.26;-1.42	28915;39027;40546;53826	4.35E-01;4.26E-01;5.63E-01;6.32E-01	23616;36906;38431;48512	3.88E-01;4.28E-01;6.09E-01;8.13E-01
SERPINB3	-1.97074	0.512871	4	AAAATCAACAGATTCCACAC;GGCCTGTACATCCTCCAGCG;TGCGTTCACAAGAACCAATG;TGAAATCGATGGTCTCCAGA	-3.27;-3.12;-1.59;0.1	20365;23523;51118;71460	3.76E-01;5.71E-01;4.08E-01;1.40E-01	5982;26324;53908;57091	6.15E-01;5.20E-01;3.87E-01;5.30E-01
SERPINB2	-3.25834	0.986296	4	AAAGTTCTCTGGAGTCATGG;CATACCGAGTTTACACGGAA;ATTCTAGGAAGTCTACTGCC;TGGGTCAAGACTCAAACCAA	-4.63;-3.54;-3.22;-1.65	1540;14588;21403;50214	1.13E+00;8.53E-01;1.21E+00;7.53E-01	27228;56032;62838;75905	4.16E-01;6.20E-01;3.95E-01;3.48E-02
SERPINB5	-2.2735	0.437364	4	TACGAAGAGACCGTATGCAA;TCAATTAAGGATCTCACAGA;CTATGTGAAAAGGAGCCACT;AATGTTTCCCATACAGAACG	-3.93;-2.73;-2.37;-0.07	8186;32124;38666;70010	5.19E-01;4.52E-01;6.03E-01;1.75E-01	7432;38761;45318;69261	5.47E-01;4.26E-01;4.78E-01;1.94E-01
SERPINB4	-1.74558	0.577946	4	TATTGGCAATGATACGACAC;ACAAATCTGTACAGATGATG;CACTGCACAACAAATTAGCA;AAAATCAGTAGATTCCACAC	-3.22;-2.29;-1.47;-0.0	21384;40037;52971;70460	3.78E-01;4.27E-01;3.93E-01;1.64E-01	6982;24471;37405;56075	5.66E-01;5.52E-01;6.33E-01;5.61E-01
SERPINB7	-0.870707	1.02405	4	AGTCGTAACTTACTTCAGAG;AGTCATCTTGAGCGCCCAAG;AGAGAGATGGATGACAATCA;TAGACGTAATATTAATAAGT	-3.07;-1.44;0.03;0.99	24682;53532;71059;74547	3.95E-01;5.63E-01;5.94E-01;6.62E-02	2895;6383;23910;52741	8.75E-01;1.46E+00;1.09E+00;6.67E-01
BRSK2	-1.66801	0.671275	5	CATACCTATCTCGTTCCGGG;GCCTGTTGGAGACCAGCTGT;CAGTCGGGCGGGATAAAGTG;TCCTGCCTCAGCCTCCCGAG;GTGCTAGAACACGTGTCAGG	-3.37;-3.01;-1.39;-0.4;-0.16	18144;25977;54152;67218;69309	3.95E-01;4.81E-01;5.10E-01;4.26E-01;2.41E-01	8133;10224;23290;51471;59305	4.72E-01;9.43E-01;8.76E-01;4.85E-01;5.79E-01
FAM76B	-1.8338	0.545635	4	CCTTTCGAGGAGCTCTCCCA;AAAGAACAAAGGAAGAGCCT;AAATGTGAAGCAATTTGGGA;TTCATTCTGAATTGTTGCAG	-3.93;-3.33;-2.43;2.35	8150;19048;37807;76119	5.21E-01;6.85E-01;6.23E-01;2.99E-02	1323;39649;58411;69282	1.19E+00;4.26E-01;3.75E-01;1.93E-01
FAM76A	-2.42376	0.558152	6	ATTATGTTGCAATACTGACA;CAGCACGAGAAGAGCTACTC;GAGCAGTATAGTCGCCTGAG;GCCGAGGCGGGCAGATCACG;CCTGAGACAGCGCCTCGAAG;CAAGGCAGGCAGATCACCTG	-3.8;-3.73;-2.8;-1.91;-1.77;-0.53	10149;11295;30632;46089;48258;65843	4.09E-01;7.70E-01;5.63E-01;5.11E-01;6.73E-01;4.23E-01	11599;29183;31359;46828;66144;67280	3.99E-01;4.93E-01;5.53E-01;5.04E-01;4.00E-01;3.67E-01
EXD3	-2.68889	0.637609	5	GGCACGAACTCACCTGCACA;GAAGACCTGACCAGACACGA;TGGTGATAGAGGGGTCCGAG;GCCGAGGCGGGCAGATCACG;GGCCACATAGCGCTCCACGA	-4.04;-3.02;-2.91;-1.91;-1.55	6643;25943;28209;46089;51668	5.23E-01;4.81E-01;7.09E-01;5.95E-01;8.79E-01	25774;31359;49250;51517;70792	4.82E-01;4.62E-01;4.67E-01;4.84E-01;1.95E-01
EXD2	-2.51978	0.538167	4	GGATGCTGAGACTCTCACAG;ACCTCCGATACCTAGCCATG;GCAGGCGAACCAAGACACAC;ACGGATCCTTAAAGCAAAGG	-4.18;-2.52;-2.45;-0.93	5009;36127;37312;61030	6.74E-01;4.30E-01;6.35E-01;4.14E-01	16412;40110;41304;72432	3.82E-01;4.27E-01;5.48E-01;1.16E-01
EXD1	-1.95478	0.614229	7	CAAGCGAAGGGGTAACAGGT;GAATAATGTCTTTGACACAC;GAATATAGGGTGAATGCACA;GCCGAGGCGGGCAGATCACG;CAAGGCAGGCAGATCACCTG;TCCTGCCTCAGCCTCCCGAG;GGAAGTCGAGCTTTCCACAA	-4.35;-3.18;-3.02;-1.91;-0.53;-0.4;-0.29	3444;22339;25854;46089;65843;67218;68227	6.25E-01;4.97E-01;5.91E-01;5.36E-01;6.79E-01;4.03E-01;3.85E-01	9215;10224;11599;31359;51588;55126;73998	4.09E-01;7.44E-01;1.21E+00;7.03E-01;5.13E-01;5.81E-01;1.38E-01
ELP6	-2.01309	0.508174	4	TCTGTGATGCCAAGACAGAT;CTTTAGTTCCCAGCACACGG;ATTGTTTGAGTTTGTACGGG;CTTCAGCCACTACAGTATCG	-3.33;-2.59;-2.15;0.03	18877;34743;42306;71020	3.75E-01;4.35E-01;5.29E-01;1.50E-01	6422;35136;42718;58547	5.92E-01;4.33E-01;5.21E-01;4.86E-01
ELP5	-3.03462	0.833966	4	CACACTCACTTTCCCCACTG;ATGCAGGACCTGGCAGAGTG;AGGATCTGTCCTCTTGCACA;GGGCCTCCGACACAGGATGT	-4.7;-3.23;-2.31;-1.9	1176;21199;39671;46310	1.24E+00;6.25E-01;5.81E-01;8.93E-01	31132;37771;56243;76266	4.64E-01;4.26E-01;3.77E-01;2.66E-02
ELP4	-1.8014	0.629146	5	GCCAGCGTGACCAACGACAG;AATGCCACAAGAACTAATTG;CCAACGGCTAAACCTCCACC;CAAGGCAGGCAGATCACCTG;CCAGTTATTACCCAAGATGG	-3.16;-2.93;-2.15;-0.53;-0.23	22680;27907;42268;65843;68740	4.36E-01;4.69E-01;4.74E-01;4.07E-01;2.59E-01	8702;11599;35152;49517;54765	4.57E-01;8.61E-01;5.55E-01;5.21E-01;7.52E-01
ELP3	-2.89926	0.716586	4	AAAACAACTTGGTCATAGTG;TATTCCACCCAGTCTTACAC;TACTTCCAACAATATTTACG;TCCGAGCCACCAATTCAACC	-3.48;-3.14;-2.9;-2.08	15881;23102;28575;43443	3.85E-01;5.80E-01;8.97E-01;1.00E+00	34006;48889;54363;61556	5.09E-01;4.88E-01;3.85E-01;3.99E-01
ELP2	-3.07252	0.897915	4	AATTTCATGCCAAGTCACCT;GTTATTGTACAGGTTCGAGT;CCAGTACCAATATTAGCATG;TGATAATCAAGTGATTCACT	-3.92;-3.59;-3.51;-1.27	8326;13673;15138;56068	5.15E-01;8.97E-01;1.62E+00;5.61E-01	21374;62286;63779;69125	3.78E-01;8.28E-01;4.04E-01;1.97E-01
ELP1	-3.40314	1.12335	4	TGGACGACTGACCGGAGCGT;GATTTATGATCATAACCCTA;AATGGTGAATGACAGACCGG;CAGCAATCATGTGTCCCATG	-3.89;-3.36;-3.29;-3.06	8701;18225;19755;24866	5.03E-01;7.12E-01;1.31E+00;1.97E+00	52554;57670;59197;68741	1.05E+00;6.64E-01;3.76E-01;2.07E-01
SPRYD3	-2.42657	0.499944	4	GACAGTTACGAGGATGAATG;GCAAAAGCATCGTGGATGTG;AGAAATGCTACATCGCCCTG;TGGGTCAAAGTGCAACTCCG	-3.35;-2.97;-1.96;-1.42	18466;26841;45437;53696	3.75E-01;5.12E-01;4.76E-01;6.36E-01	23746;32005;50576;59000	3.88E-01;4.52E-01;4.13E-01;4.72E-01
SPRYD4	-2.35389	0.502008	4	CCGCTGGGGAGCCAAACGAT;TACGGGTGTCAAATATGGCT;CTGGGCATAGGTGAACACCC;CAGTTTGAAACTGACGCCTG	-3.03;-2.83;-2.63;-0.93	25649;30058;33949;61070	4.02E-01;4.71E-01;7.23E-01;4.13E-01	16372;43478;47399;51788	3.82E-01;4.39E-01;4.49E-01;6.99E-01
SPRYD7	-2.06677	0.540291	4	GACTGGCCACATCCCTCTGA;CTGTGCATATCTCGGCCAAG;AGTACCATTATACCAACCTG;GCAAACAGTCTTCCGCAGGA	-4.38;-1.52;-1.5;-0.87	3219;52207;52475;61806	8.34E-01;5.38E-01;3.97E-01;3.92E-01	15636;24967;25235;74225	3.87E-01;5.43E-01;1.03E+00;7.37E-02
RAC2	-2.57744	0.539183	4	TTATGAGAACGTCCGCGCCA;TCTGTGGATAGGAGAGCGGC;ACAGCAAGCCAGTGAACCTG;ATCCCCAGGAACTCACACGG	-3.75;-2.76;-2.74;-1.06	10959;31423;31880;59127	4.46E-01;4.57E-01;7.85E-01;4.69E-01	18315;45562;46016;66475	3.76E-01;4.54E-01;4.68E-01;2.65E-01
KLHDC4	-2.41472	0.541914	4	TCCAGACACTCGATGCCAAG;TAGACGACGATGCCGCCCTG;CTCAAACCAACGGTTCCTGG;CTTCCATGAAAGTACACGGT	-3.5;-2.21;-2.2;-1.75	15296;41319;41606;48674	3.89E-01;4.30E-01;5.42E-01;8.07E-01	28768;35836;36123;62132	4.33E-01;4.31E-01;6.64E-01;3.83E-01
KLHDC2	-2.73767	0.994713	4	CTATCTTAATCTGGATACAT;CTACAGACAGAGTGTTACAG;CTTCGAGAGCTATGAGTCCA;AGAACTATGGATCTACAACA	-4.79;-4.32;-1.23;-0.61	804;3718;56688;64958	1.40E+00;1.90E+00;3.76E-01;3.05E-01	12484;20754;73724;76638	4.20E-01;6.37E-01;7.81E-01;1.81E-02
KLHDC3	-0.577395	0.942321	4	ACCAGAGCAGTAACCCCCGA;GGCGGGCGGAATGACACCGA;TAGCGCATGTAGGGTACCAC;ACAGATAAGAGTCCATGTCA	-2.98;-2.51;-0.79;3.98	26654;36264;62796;76985	4.11E-01;4.29E-01;3.94E-01;1.03E-02	457;14646;41157;50773	1.63E+00;8.50E-01;5.51E-01;7.33E-01
KLHDC1	-2.30313	0.64008	5	AAGAACTGCACATGTATGCG;ACTATCTAAACCTAGACACC;CAGCAGGAAAGTTTATCACG;ACGGAAACTTCCTCTACGTG;CAAGGCAGGCAGATCACCTG	-4.17;-4.1;-1.45;-1.27;-0.53	5144;5976;53287;56062;65843	5.98E-01;1.33E+00;4.99E-01;4.21E-01;3.52E-01	11599;21380;24155;71458;72298	4.07E-01;5.39E-01;8.43E-01;5.53E-01;1.49E-01
ASXL1	-2.18842	0.470279	5	TTTCACGTATCAAACCACCC;ATCTGACGTACACTTTCCAG;GAATCAGTGCGTATACAGCG;GCCGAGGCGGGCAGATCACG;GGTCAAATGAAGCGCAACAG	-3.78;-3.06;-2.57;-1.91;0.38	10526;24884;35249;46089;72802	4.22E-01;4.91E-01;5.53E-01;5.95E-01;1.34E-01	4640;31359;42222;52577;66914	6.31E-01;4.62E-01;4.75E-01;4.67E-01;3.17E-01
TRIM51	-3.29549	1.2472	5	ACATACACTGTCCCATTGAG;TGAATCCAGAGCTCAGTGCA;CTGAATGCAAGAAGACAACG;AAATCTCAGAAATCTGAACA;ACTCACCTCTGAATCCACTG	-4.3;-4.22;-3.82;-3.22;-0.91	3882;4581;9771;21233;61294	6.90E-01;1.54E+00;1.81E+00;1.69E+00;5.08E-01	16148;56207;67671;72863;73565	3.88E-01;9.64E-01;9.74E-01;6.35E-01;1.12E-01
ASXL3	-3.03696	0.835547	4	AGGTAAGTCAGACATCGGTG;AATGGTGTCAAAACAACACG;CAAGTTCTGGAATTGAAGCA;TCCCATTTCAGCCACTACAG	-3.45;-3.08;-3.08;-2.54	16501;24380;24486;35740	3.82E-01;5.54E-01;1.06E+00;1.34E+00	41708;52958;53041;60941	6.74E-01;5.52E-01;3.93E-01;4.16E-01
RAC1	-2.39888	0.462605	4	CTGTTTGCGGATAGGATAGG;CTGGGCTTATGGGATACAGC;TCACATCTAGTGGTATCCTG;ATTTAAGATACTTACACAGT	-3.71;-2.77;-2.14;-0.97	11595;31169;42475;60424	4.34E-01;4.60E-01;5.26E-01;4.31E-01	17018;34967;46252;65837	3.79E-01;4.34E-01;4.64E-01;2.82E-01
HDDC2	-3.22689	1.00212	4	CCATAGCCATAACTGCCATC;TTCTGCCATATCATGAACCA;GATAACCCAGCTCCTACCAG;GGGTATACAGAAATGTCCAG	-3.44;-3.42;-3.16;-2.89	16623;17066;22696;28640	3.81E-01;7.52E-01;1.15E+00;1.73E+00	48783;54719;60367;60812	8.94E-01;5.89E-01;3.79E-01;4.20E-01
HDDC3	-1.74527	0.540402	4	TACACTTTGGGGCACAAGTG;GGCCCTGCTCCATGACACGG;ACATCAACCACCCCATCGGT;AGCGGCGGAAGGACCCCGAG	-3.92;-3.26;-1.43;1.63	8279;20384;53679;75459	5.16E-01;6.47E-01;3.89E-01;4.50E-02	1983;23763;57044;69167	1.02E+00;5.66E-01;3.76E-01;1.96E-01
DONSON	-2.21105	0.437692	4	CCCGCCTGGACAACCGACCG;TGAGGACGGAATATCAGGCT;GAAGGTACAACGGAGCTCAG;AGGTACAAACGTAGAAATAG	-3.46;-2.98;-2.15;-0.27	16295;26807;42383;68448	3.83E-01;5.12E-01;5.27E-01;2.14E-01	8994;35049;50616;61134	4.94E-01;4.34E-01;4.12E-01;4.11E-01
SPATA13	-1.17821	0.945512	8	ACTTACTCTGACGAAGCTCG;AGTGGATGACAACGGTAGTG;GCCGAGGCGGGCAGATCACG;GGAATCTCACTCTGTCACCC;CACACGGTCCAACCCAATGG;CAAGGCAGGCAGATCACCTG;GAGAATCGCTTGAATCCGGG;GGGAGATCATGGACACCGAG	-4.07;-3.8;-1.91;-1.53;-1.34;-0.53;0.44;3.31	6336;10111;46089;52067;55004;65843;73043;76681	4.44E-01;6.86E-01;8.91E-01;7.83E-01;6.09E-01;6.25E-01;5.20E-01;3.43E-02	761;4399;11599;22438;25378;31359;67335;71106	1.13E+00;1.20E+00;1.08E+00;9.01E-01;1.19E+00;1.36E+00;4.06E-01;2.97E-01
SPATA12	-0.668101	1.17235	4	TACAGCGATGTCAAGAGAGA;CATGATGCCAGTGCACAGTG;ATCTCTGACAGGTCTCACTT;CCAGCTCTCCTGATACAGCA	-3.02;-0.89;0.08;1.16	25906;61514;71370;74865	4.04E-01;7.96E-01;6.10E-01;5.88E-02	2577;6072;15928;51549	9.20E-01;1.50E+00;1.56E+00;7.07E-01
SPATA17	-2.07962	0.52346	5	TAGCCAATCAGTAAGGCTGG;CAGAAAAGAGCCTGATCCAT;AGAAGAAGGCTAACCTCGAA;CAAGGCAGGCAGATCACCTG;CATTGCTTTCTATTAATAGG	-3.53;-3.38;-2.56;-0.53;-0.4	14824;17967;35436;65843;67158	3.88E-01;6.13E-01;5.50E-01;4.07E-01;3.09E-01	10284;11599;42020;59493;62614	4.25E-01;8.61E-01;4.76E-01;3.94E-01;4.62E-01
SPATA16	-2.04774	0.503853	5	GATGACCAGTCAACTGTCTG;TTGCCCTGAATCATGCACAC;TCTTCAGCAGGTGCATCAAA;TTCCTCTTAGGCCATGATTG;CAAGGCAGGCAGATCACCTG	-3.99;-2.8;-2.26;-0.66;-0.53	7363;30725;40585;64368;65843	4.96E-01;4.61E-01;4.87E-01;3.95E-01;3.52E-01	11599;13074;36857;46717;70086	4.07E-01;7.86E-01;5.29E-01;5.81E-01;2.17E-01
SPATA19	-3.02397	0.834951	4	CATTGACGTTGTGGAAAGTG;TTACCGAACTGGTTATTGGT;CATCCACGTGACCAGAGATG;ACATCTTCTCCCTTACACCC	-4.58;-3.64;-2.12;-1.76	1781;12873;42828;48428	1.07E+00;9.38E-01;5.19E-01;8.16E-01	29014;34614;64566;75661	4.36E-01;4.36E-01;4.14E-01;4.04E-02
SPATA18	-0.864748	0.916727	5	TGTTGCATATCCCGATCCCG;GCTGAGAAAAGTGCACTCCA;GATGTAGATGATCCGCTGAA;CAAGGCAGGCAGATCACCTG;GCCACAGAAACACAGATCAG	-2.96;-2.94;-2.46;-0.53;4.56	27190;27672;37245;65843;77181	5.07E-01;4.70E-01;5.23E-01;4.07E-01;7.30E-03	261;11599;40174;49787;50280	1.78E+00;8.61E-01;4.90E-01;5.16E-01;9.38E-01
CPLX2	-1.28329	0.707458	4	CCCCGACGCGCAGAAAAAGG;TAGGGGCCACAAAGGACATG;GGCCAAGCACGCGCGCATGG;CCGGCAGCAGATCCGAGATA	-4.13;-3.64;-0.87;3.51	5642;12752;61778;76779	6.34E-01;9.45E-01;3.86E-01;1.49E-02	663;15664;64690;71807	1.48E+00;8.06E-01;4.16E-01;1.31E-01
TRIM53AP	-0.652014	0.937283	3	AAGCCAAAATGGCTCATAGG;CAGACACCGTCCCATTGAGT;CAGCAGCCCACTCAATGGGA	-3.33;-0.52;1.9	18888;65978;75724	3.78E-01;4.92E-01;2.92E-02	1718;11466;58568	1.20E+00;1.25E+00;3.64E-01
TUBB8P10	-0.236949	0.947161	1	GTGTACTACAACGAGGCCAG	-0.24	68696	0.052	8746	0.947
RINL	-1.57573	0.777407	4	TGTGCGGAGTCGTGTCCACA;GACCAGAGACTGGACGTGAA;GGCAAAGGACTCCTACATCA;AGATCCTGTGCAGATCGGCA	-2.9;-1.24;-1.09;-1.08	28498;56556;58716;58898	4.30E-01;6.33E-01;3.75E-01;4.75E-01	18544;18726;20886;48943	3.75E-01;6.95E-01;1.24E+00;7.97E-01
HFE	-1.38739	0.847605	4	GCAAGAAGACAACAGTACCG;TGATGTGTCACCTTCACCAA;GTAGCCCAAAGCTTCAAACA;TGATCATGAGAGTCGCCGTG	-2.65;-1.18;-1.12;-0.61	33739;57461;58359;64965	5.04E-01;6.58E-01;3.75E-01;3.05E-01	12477;19083;19981;43703	4.20E-01;6.84E-01;1.29E+00;9.94E-01
GPR146	-1.97616	0.650214	4	GACAAAGTACACGTCCGGCA;TGGCCAGCGTGTACAACACG;GGCGCACTCTAGCGCGCGGG;GGAGTACATGGCCACCAGTG	-2.73;-1.9;-1.84;-1.44	32146;46389;47211;53450	4.79E-01;4.61E-01;4.51E-01;6.44E-01	23992;30234;31053;45311	3.90E-01;4.69E-01;8.11E-01;9.31E-01
GPR141	-1.57699	0.797522	4	ACATCCAAGTCTTCTTGATG;CAAGTTAATGACCGCCATGG;CCATACCGGGAGACAACCAG;CCACATAGAATAGGAACGTG	-2.05;-1.89;-1.55;-0.81	43930;46449;51716;62543	7.36E-01;4.61E-01;4.03E-01;3.71E-01	14899;25726;30993;33512	3.92E-01;5.30E-01;8.13E-01;1.46E+00
GPR142	-1.16916	0.970518	4	GTGTCTGCGTAAGGATCCTG;CACCTGGATGATGATATCCG;ACTGGCCAGAGATCGCAGAG;GAAGGGGATGCCGGTCAACA	-2.7;-0.83;-0.81;-0.33	32653;62255;62547;67847	4.86E-01;8.26E-01;3.92E-01;2.30E-01	9595;14895;15187;44812	4.77E-01;8.39E-01;1.62E+00;9.50E-01
GPR143	-1.14071	1.05946	5	TTTACACGGAGAACGAGAGG;CAGCAGGCCAAATTTCCGTG;AGGTACATGGTGACATAGTG;TCCTGCCTCAGCCTCCCGAG;CTGTATCACATCATGGCGTG	-2.76;-2.07;-0.42;-0.4;-0.05	31456;43615;66992;67218;70132	5.98E-01;5.78E-01;9.29E-01;4.26E-01;2.15E-01	7310;10224;10450;33827;46001	4.98E-01;9.43E-01;1.74E+00;9.89E-01;1.13E+00
ZNF212	-1.98732	0.516172	4	CCAGAGCAGACCGAACTCTG;CGTCCAGAGTGAAATCTCGG;CACACTCAGAACATTCGTAG;ACAGGAGCTACAGTATACAC	-3.2;-2.46;-1.66;-0.63	21829;37247;49988;64740	3.79E-01;4.27E-01;4.19E-01;3.11E-01	12702;27454;40171;55628	4.16E-01;5.03E-01;5.71E-01;5.75E-01
GPR148	-3.31614	1.1374	4	TGAGAATGCCACAGGCCATG;TGAGCCAAATAAGGAATGTG;GAACAGAACGCACAGAATGG;TACATCCTACCACCAAGCAT	-4.27;-4.11;-3.55;-1.34	4156;5880;14340;54962	7.40E-01;1.53E+00;1.68E+00;5.96E-01	22480;63102;71562;73286	3.82E-01;8.65E-01;6.20E-01;9.58E-02
GPR149	-0.814229	0.8728	4	ATACGATGCACAGAGGTGTG;TCACCGATTGCTGTGTTCGG;ACAGAAATTGGAAGTAACCG;TGGTGGTCCAGAACGTCGTG	-3.72;-3.43;-0.5;4.4	11395;16798;66192;77132	4.38E-01;7.62E-01;4.40E-01;6.95E-03	310;11250;60623;66047	1.80E+00;1.03E+00;3.80E-01;2.76E-01
LOC105376806	-1.6424	0.455617	1	ACCCACTATAGCGACCAGAT	-1.64	50318	0.187	27124	0.456
SLC7A6	-1.43952	0.732737	4	CAACTAGCAGTGAGACCCAC;TGGGCAACATGATCGGCTCA;TACCCTGGCACAGTTTAACA;GTCTGGTCAGCAAATGTCTG	-3.76;-2.3;-0.07;0.37	10813;39796;69986;72792	4.49E-01;4.27E-01;5.46E-01;1.08E-01	4650;7456;37628;66645	7.00E-01;1.34E+00;6.27E-01;2.61E-01
KNL1	-2.42503	0.688685	8	ACAGAAACCTAAATTTCCAA;TGAAGAAAATAAGCCAGGCA;AGCCATAATATAGTCTACTG;TACCAGAAGTCATATTATGG;AGTGATATGTACTCCTACTG;GCCGAGGCGGGCAGATCACG;CAAGGCAGGCAGATCACCTG;GAGAATCGCTTGAATCCGGG	-4.17;-3.99;-3.82;-3.29;-2.13;-1.91;-0.53;0.44	5124;7383;9770;19937;42603;46089;65843;73043	4.84E-01;8.55E-01;1.24E+00;1.03E+00;5.90E-01;6.90E-01;4.15E-01;2.03E-01	4399;11599;31359;34839;57499;67679;70048;72319	5.20E-01;6.25E-01;5.57E-01;5.81E-01;6.66E-01;7.03E-01;4.22E-01;2.38E-01
SLC7A7	-1.89506	0.637626	6	CAGGATAATGCAACTGACAG;GAAAGCAAGGAATCCTCCAA;GCCGAGGCGGGCAGATCACG;TGTATATGAGCACACCCTTG;GGCATTGTTAGACTTGGCCA;TCCTGCCTCAGCCTCCCGAG	-3.21;-3.01;-1.91;-1.79;-1.05;-0.4	21657;26003;46089;48017;59328;67218	4.88E-01;4.83E-01;5.53E-01;4.95E-01;4.31E-01;3.69E-01	10224;18114;29425;31359;51419;55758	4.09E-01;5.49E-01;5.82E-01;8.45E-01;5.85E-01;8.56E-01
CITED2	-1.4173	0.813505	4	ATGGGCGAGCACATACACTA;GCGGCATCAGGCATGCGATG;GCAGCCCATTGGTGCCGTCG;GTTGTTAAACCTGGCCGCGG	-2.27;-1.72;-1.31;-0.36	40354;48995;55329;67601	6.40E-01;4.89E-01;3.80E-01;2.36E-01	9841;22114;28447;37088	4.71E-01;6.03E-01;9.02E-01;1.28E+00
CITED1	1.08507	2.20672	4	CGTGGCCTACTCCAACCTTG;TTCCATTTGAGGCTACCCCA;AACTTAATAGCCAGTATCAG;AGAGCCTATTGGAGATCCCG	-1.2;-0.11;1.52;4.13	57086;69694;75334;77037	1.27E+00;1.31E+00;9.99E-01;9.09E-03	405;2108;7748;20356	1.69E+00;2.38E+00;2.44E+00;2.32E+00
HLA-A	-3.44407	1.10709	4	GGATGTGAAGAAATACCTCA;CCAGTCACAGACTGACCGAG;TACCGGCAGGACGCCTACGA;CACGCACGTGCCATCCAGGT	-4.2;-3.44;-3.26;-2.88	4846;16701;20533;28839	6.86E-01;7.65E-01;1.26E+00;1.72E+00	48626;56917;60739;72596	8.88E-01;6.43E-01;3.81E-01;1.12E-01
CITED4	-3.23501	0.941516	4	CCCGAAGGCCCCGTACGCCA;CCTGTGGCGACGCCGTACCC;GCAGAGTCCGGAGCGCATGA;GCGCCCCCCAACGCTCCGGG	-3.81;-3.34;-2.94;-2.85	9907;18775;27708;29552	4.69E-01;6.94E-01;9.29E-01;1.67E+00	47907;49741;58681;67540	8.62E-01;4.99E-01;3.75E-01;2.38E-01
DAGLA	-2.41304	0.520348	5	GGGCTATAGTTAGGTCGCTG;TGGCTTGACCCTCCTCTAAG;AAGTGGTGATCAGTATCCGG;AGAGATGCTCCGCTACAAAG;CAAGGCAGGCAGATCACCTG	-3.62;-3.19;-3.07;-1.65;-0.53	13084;21915;24839;50226;65843	3.95E-01;5.30E-01;8.17E-01;5.07E-01;3.52E-01	11599;27216;52621;55515;64351	4.07E-01;4.72E-01;4.92E-01;4.27E-01;4.02E-01
DAGLB	-2.06531	0.465307	4	AGCTTAGACATAGACTTCCG;ACCACAGACTATGACTTGGT;ACGTTGTATCTCATGCACAG;CGGCATCATCGCAACCGTCG	-3.76;-2.3;-1.37;-0.83	10768;39831;54487;62335	4.50E-01;4.27E-01;3.84E-01;3.77E-01	15107;22955;37611;66688	3.90E-01;5.83E-01;6.28E-01;2.60E-01
SLC7A2	-1.17824	0.911156	4	GCCATAGCATAGATTACACG;ATTCAAACGCTACAGGAAGG;GGTCCATGGTGGATAAGCAG;AAACGGAACAAGTATCTATG	-2.57;-1.28;-0.89;0.03	35173;55836;61519;71044	5.30E-01;6.15E-01;3.85E-01;1.50E-01	6398;15923;21606;42252	5.93E-01;7.96E-01;1.20E+00;1.05E+00
SLC7A3	0.224493	2.36986	4	ACCTGGTAGAAAGAGCACAG;GTACTTGCTCGGATCCACAC;CCCATCGGGATGGAACGCTG;AGATATGCCGAACCAGAACG	0.06;0.06;0.24;0.54	71208;71225;72263;73400	2.72E+00;1.49E+00;6.63E-01;9.31E-02	4042;5179;6217;6234	7.50E-01;1.63E+00;2.72E+00;4.38E+00
SLC7A1	-2.30825	0.483183	5	TAAAAACTGGCAGCTCACGG;GCTGATAGGCAGACCCATCG;AGTAGGGCATCATGAGCGTG;GTGGCTGGCGGACATACCTG;CAAGGCAGGCAGATCACCTG	-4.09;-3.36;-2.3;-1.27;-0.53	6122;18338;39951;56016;65843	5.46E-01;6.03E-01;4.92E-01;4.22E-01;3.52E-01	11599;21426;37491;59085;71320	4.07E-01;5.38E-01;5.20E-01;3.96E-01;1.79E-01
CSNK1A1L	-0.837248	0.86545	4	ATACATGAAAACGTAGCCTA;CTGACCATACCAGTGCATGT;GAGGGAAATACAAACTGGTG;TGCTCTCATACAGCAACTGG	-3.38;-1.37;-1.34;2.74	17926;54475;54888;76379	3.76E-01;5.83E-01;3.82E-01;2.40E-02	1063;22554;22967;59537	1.28E+00;5.92E-01;1.13E+00;4.57E-01
HIRA	-2.47868	0.771126	6	GGGTTGACATGGGACCCTGT;TGTGTGCGGTGGTCAAACAG;ATGTCTGAAACGGCCGCTGG;GGAATCTCACTCTGTCACCC;GAGCCTAGCCATCATGACCG;CAAGGCAGGCAGATCACCTG	-4.68;-4.12;-3.47;-1.53;-0.54;-0.53	1253;5700;16059;52067;65801;65843	1.05E+00;1.22E+00;1.05E+00;4.83E-01;3.99E-01;4.23E-01	11599;11641;25378;61383;71735;76189	3.99E-01;7.53E-01;6.70E-01;5.94E-01;5.21E-01;4.25E-02
RIN1	-1.9752	0.479209	4	GCTCCCTACTGGCACCGGAG;GGGTGTTAGATTTCCGCACG;TATGACGTGCCCAATGCCAG;CTCAACATCAAGGCTCAGCG	-3.69;-2.87;-1.7;0.36	11856;29174;49326;72745	4.29E-01;4.80E-01;4.26E-01;1.09E-01	4697;28116;48292;65573	6.97E-01;4.94E-01;4.38E-01;2.89E-01
RIN3	-1.88564	0.538958	5	GGCCTGAGGCTGGAGACTAG;CCTTAGAAGACCAAAGTCCG;TCATCAAAACATGCCCGGTG;GGAATCTCACTCTGTCACCC;AATGGTGTATTCGAGCACCT	-3.71;-2.87;-2.08;-1.53;0.75	11620;29221;43514;52067;74007	4.07E-01;4.64E-01;4.68E-01;4.75E-01;9.85E-02	3435;25378;33928;48244;65826	7.33E-01;4.86E-01;5.76E-01;5.47E-01;3.53E-01
RIN2	-1.92422	0.622587	7	AGTGGGGCCCCAAATTCACA;CACCTGAACCTGGGAGACAG;GGCCCTTGTGCAATCCCCCG;TGGAGACTATTAATAGCGGG;AGCAGCCTGGAGGACTACGA;CAAGGCAGGCAGATCACCTG;TCCTGCCTCAGCCTCCCGAG	-3.52;-3.23;-2.45;-2.02;-1.31;-0.53;-0.4	14896;21108;37417;44439;55345;65843;67218	4.27E-01;4.98E-01;5.50E-01;5.32E-01;4.97E-01;4.02E-01;4.30E-01	10224;11599;22097;33008;40014;56348;62540	4.03E-01;6.79E-01;6.73E-01;6.61E-01;7.43E-01;5.48E-01;6.50E-01
WWOX	-1.13419	0.96256	7	CCAAGATCACATGTGCACCA;CAAGGTAGAAGCAATGACCC;GCCGAGGCGGGCAGATCACG;GGAATCTCACTCTGTCACCC;CAAGGCAGGCAGATCACCTG;ACACCGAGGAGAAGACTCAG;GCCGTCGTATCTTTGCCGGG	-3.94;-2.46;-1.91;-1.53;-0.53;0.05;2.39	8035;37085;46089;52067;65843;71150;76145	4.24E-01;7.33E-01;7.03E-01;5.99E-01;6.79E-01;4.66E-01;5.13E-02	1297;6292;11599;25378;31359;40352;69407	9.75E-01;1.04E+00;1.21E+00;9.11E-01;1.09E+00;1.17E+00;3.33E-01
LNX1-AS1	-1.52854	0.484514	1	GGAATCTCACTCTGTCACCC	-1.53	52067	0.172	25378	0.485
RIPK1	-3.58238	1.45562	4	TGGAAAAGGCGTGATACACA;GGCACCGCTAAGAAGAATGG;GGGAAGCGAATCCGGAAGCT;CCATGCGGCTGCCATAAAGA	-4.72;-4.58;-3.17;-1.86	1085;1761;22548;46956	1.27E+00;2.53E+00;1.16E+00;8.69E-01	30486;54894;75681;76357	4.55E-01;5.92E-01;1.07E+00;2.45E-02
RIPK3	-1.69744	0.670463	4	CGGGCGCAACATAGGAAGTG;GTTTGTTAACGTAAACCGGA;TCCCGGCTTAGAAGGACTGA;ACTGCTTCGTACACGAGTGA	-2.94;-1.64;-1.43;-0.78	27670;50352;53631;62936	4.21E-01;5.08E-01;3.89E-01;3.60E-01	14506;23811;27090;49785	3.96E-01;5.65E-01;9.53E-01;7.68E-01
RIPK2	-2.57673	0.590294	4	TGTAAATCATGGTCCACAAG;ACTGCCTACCTGTCGAGCAG;ACAGCTATGCAGTTATCACA;GAGATCATACGTGCTCGGTG	-3.99;-2.28;-2.27;-1.76	7388;40134;40355;48355	5.49E-01;4.27E-01;5.67E-01;8.18E-01	29087;37087;37308;70057	4.37E-01;4.28E-01;6.35E-01;1.74E-01
PDCL	-3.49479	1.166	4	GGAGTTTGCCATAATGAATG;GACCACGAGGACAAGGACCG;GAAGGCATCTCAGTTAACAC;GCAGTACCGGAAGCAGCGAA	-4.33;-3.68;-3.51;-2.45	3609;12029;15126;37361	7.92E-01;9.86E-01;1.62E+00;1.27E+00	40081;62330;65397;73833	6.34E-01;8.30E-01;4.26E-01;8.29E-02
IGFBP7-AS1	-2.15731	0.422718	3	GACGGCACCACCTACCCGAG;GGAATCTCACTCTGTCACCC;GAGGCGGAAGGGTAAAGCCG	-3.61;-1.53;-1.33	13307;52067;55057	4.52E-01;3.52E-01;4.44E-01	22385;25378;64137	3.58E-01;6.64E-01;2.46E-01
COX6B1P5	-2.65047	0.632697	4	TCTTCACAGCCTAACCAGCA;CCAGTTATTGAATATGCCAG;CAGGCAAGCCTATTCTAGAA;AATTGCGATAAAAATACCAG	-3.5;-2.48;-2.38;-2.24	15391;36764;38625;40875	3.88E-01;4.28E-01;6.04E-01;1.11E+00	36560;38838;40660;62058	5.56E-01;4.26E-01;5.61E-01;3.85E-01
SRCIN1	-1.36103	0.867579	4	GCCGGCGGCCTCTACAAGCG;CATCTGCAGCCGGCTAACGG;GCGCGTGCACATCACGCACG;GCTGCGCTATCTCAACGACG	-2.1;-1.63;-1.15;-0.56	43117;50567;57767;65519	7.12E-01;5.11E-01;3.75E-01;2.90E-01	11923;19675;26875;34325	4.28E-01;6.67E-01;9.62E-01;1.41E+00
TUBG1	-2.38041	0.669336	5	TGACTGGTCCGTAGTGAGAG;AGATGGTAGTGACAGTCTAG;GACATGATGGTAGACACCTG;CGTGGAGGAGTTCGCCACCG;CAAGGCAGGCAGATCACCTG	-4.21;-4.2;-1.73;-1.23;-0.53	4707;4870;48878;56697;65843	6.26E-01;1.49E+00;4.66E-01;4.15E-01;3.52E-01	11599;20745;28564;72572;72727	4.07E-01;5.50E-01;6.99E-01;6.15E-01;1.36E-01
C2orf27A	-2.25109	0.529337	7	GGAGCCCAGATTGCAAACCC;GGCACCTCCTGTAGAGCCAC;TGCCCAGGACCAGCCCAGTG;AGAGAAGTCCCTCTCCAGTG;GAGGCCGGTGGCTCTACAGG;CAGGGGCAGATTCCCCTCCA;CCTGGGCAGTCCCAGGGCAG	-3.76;-3.09;-2.8;-2.59;-1.69;-1.05;-0.77	10776;24146;30617;34700;49459;59319;63105	4.02E-01;5.01E-01;5.39E-01;6.25E-01;5.36E-01;4.80E-01;6.22E-01	14337;18123;27989;42763;46819;53311;66666	4.21E-01;5.18E-01;5.61E-01;5.34E-01;5.76E-01;6.34E-01;4.55E-01
CRABP1	-2.15514	0.549458	4	CTACATCAAGACATCCACCA;CAGGTGTGAACGCCATGCTG;CCTGCAGAGTTTAGCCACTT;TCCTGGCGGATCTCCACGTG	-4.58;-2.28;-1.08;-0.68	1778;40296;58869;64120	1.07E+00;4.27E-01;3.75E-01;3.28E-01	13322;18573;37146;75664	4.08E-01;7.00E-01;6.39E-01;4.03E-02
CRABP2	-2.30328	0.458755	4	CAACTGGAAAATCATCCGAT;AGCAGTGGAGATCAAACAGG;GATGCTGAGGAAGATTGCTG;AACCTTGAAGTTAATCTCTG	-3.5;-3.02;-2.69;-0.0	15454;25824;32861;70448	3.88E-01;5.28E-01;7.55E-01;1.64E-01	6994;44603;51634;62005	5.65E-01;4.46E-01;4.03E-01;3.86E-01
C2orf27B	-2.45722	0.614027	8	GAGCAGGGGCCAGAGACACT;GGAGCCCAGATTGCAAACCC;GGCACCTCCTGTAGAGCCAC;TGCCCAGGACCAGCCCAGTG;AGAGAAGTCCCTCTCCAGTG;GAGGCCGGTGGCTCTACAGG;CAGGGGCAGATTCCCCTCCA;CCTGGGCAGTCCCAGGGCAG	-3.9;-3.76;-3.09;-2.8;-2.59;-1.69;-1.05;-0.77	8598;10776;24146;30617;34700;49459;59319;63105	4.09E-01;6.56E-01;5.82E-01;6.41E-01;7.69E-01;6.05E-01;5.38E-01;7.11E-01	14337;18123;27989;42763;46819;53311;66666;68833	4.52E-01;5.09E-01;5.52E-01;5.82E-01;5.53E-01;5.39E-01;4.09E-01;4.09E-01
C7orf73	-1.46714	0.840384	5	CAGCTCCACTCACCAGGAAC;TGGATTTACACTGGGCAACG;GGAATCTCACTCTGTCACCC;CTCTTCAAAGATACCAAACC;TTTCAGCTTGGATTTACACT	-2.92;-1.63;-1.53;-0.91;-0.35	28129;50507;52067;61318;67651	5.25E-01;7.47E-01;4.86E-01;3.88E-01;2.93E-01	9791;16124;25378;26935;49291	4.34E-01;6.67E-01;7.98E-01;1.32E+00;9.81E-01
C7orf72	-1.41035	0.86256	4	GAGTAAAACACTGTGAGATG;AAGGTCACATCATCCCGAAG;AAAATCCACTAGGGTTGGTA;AAACAAGAAATGTAATGCAA	-2.32;-1.51;-0.91;-0.91	39534;52413;61292;61313	6.21E-01;5.42E-01;3.83E-01;4.06E-01	16129;16150;25029;37908	3.84E-01;7.87E-01;1.04E+00;1.24E+00
C7orf71	-1.88645	0.500973	4	ACTCTCGGCCTCATTATGAG;ACTCAGAGACAAGACACATG;ACAGAGCTTTCTCCGCATGT;CCAAGATCAAGGCGTAGGCA	-4.37;-2.52;-1.69;1.03	3237;36123;49571;74623	8.32E-01;4.30E-01;4.23E-01;6.44E-02	2819;27871;41319;74203	8.85E-01;4.97E-01;5.48E-01;7.42E-02
C7orf77	-2.84583	0.686435	4	CAGGGCAATATTGGAATCAA;AATCTACTCTTTGACAAACA;CAAGGCTCCTGAAATCACGC;AGCAGAAAGGGTTTGTACCA	-3.67;-3.49;-2.98;-1.25	12235;15637;26817;56401	4.23E-01;8.07E-01;9.64E-01;5.51E-01	21041;50627;61805;65207	3.77E-01;5.12E-01;3.87E-01;2.99E-01
TUBG2	-3.58883	1.27014	4	TGACTGGTCTGTAGTGAGCG;GGTCATTGTTCATGTAGCCG;CGTGGAGGAATTCGCCACCG;GGACGAGATGAGCGACGTAG	-4.19;-3.91;-3.49;-2.76	4899;8485;15574;31366	6.82E-01;1.24E+00;1.59E+00;1.57E+00	46090;61868;68961;72543	8.01E-01;8.10E-01;5.10E-01;1.14E-01
ZNF419	-2.79652	0.683006	5	CAGCATCACAAAATCCACAC;GAAGTCCTTGCAAAGCAGGG;CAGCATCAGAGAATTCACAC;ACACAGGAGAGAAGTCACAT;CCTTACGGGTGTAGTAACTG	-3.79;-3.37;-2.92;-2.43;-1.47	10271;18022;28089;37723;52966	4.26E-01;6.11E-01;7.13E-01;8.40E-01;8.25E-01	24476;39719;49335;59430;67183	4.61E-01;5.17E-01;4.68E-01;3.94E-01;3.09E-01
ZNF418	-3.15855	0.922175	4	CACCTTAGGAACCATCAGCG;TGTGAGTCTCCCTTTCAGTG;TCATCTATCTTCATTCAGAG;TTGGTGTGGATCAGAAGATG	-4.61;-3.31;-3.26;-1.46	1652;19489;20459;53139	1.10E+00;6.72E-01;1.27E+00;6.54E-01	24303;57002;57978;75790	3.92E-01;6.45E-01;3.75E-01;3.74E-02
ZNF417	-1.38858	1.15716	9	CGTGAGCAACTTACCCAGCG;GATAAGCTGTCTTTCCAGTG;ATGAGGCCACACATTTCACA;GGAGAGAGAGCTTATCACTG;ACAGACAGCTTATCCCTGTG;TGAGGCCACACATTTCACAG;GAACGTCCTTCCCAAACTCG;TCCTGCCTCAGCCTCCCGAG;CTTATGAGTGTAGAGAATAT	-2.74;-2.24;-2.02;-2.0;-1.62;-1.19;-0.62;-0.4;0.32	31910;40828;44465;44762;50709;57252;64913;67218;72603	1.28E+00;1.28E+00;1.02E+00;7.25E-01;6.67E-01;6.14E-01;5.62E-01;4.17E-01;2.52E-01	4839;10224;12529;20190;26733;32680;32977;36622;45508	4.74E-01;6.33E-01;9.09E-01;8.91E-01;9.45E-01;1.04E+00;1.52E+00;1.93E+00;2.08E+00
ZNF416	-1.70491	0.575377	4	CAGCTGCAAAGAGTCCACCC;ACCTCAGGTCAGGACTCCAG;GCAGGAACTATACTTGACTG;TCATAGTTAGCAATAGCTTG	-3.47;-3.03;-1.18;0.85	16074;25657;57452;74252	3.84E-01;5.31E-01;3.75E-01;7.31E-02	3190;19990;51798;61366	8.38E-01;6.58E-01;4.02E-01;4.04E-01
ZNF415	-2.4082	0.586771	5	AGAGACCAACGCGATAGAAG;GAACTCTCCGATGTAGTGCA;CAGCATCAGAGAATTCACAC;GTGGTGAAACTGAGGAACCA;GAACTCTCCAATGACGCGCA	-4.02;-3.67;-2.92;-2.35;0.92	6955;12219;28089;39029;74414	5.11E-01;8.28E-01;7.13E-01;7.96E-01;8.66E-02	3028;38429;49335;65209;70483	7.78E-01;5.02E-01;4.68E-01;4.01E-01;2.04E-01
ZNF414	-3.33977	1.20407	4	AGGCAGCCACACCGCCAGTG;CAGCTCCAGTGAGACCGACA;CATAGTCTCCGGGACCAGCG;TGATGCGGGGTCAACCTCCG	-4.61;-4.44;-2.23;-2.08	1646;2722;41067;43448	1.10E+00;2.16E+00;5.53E-01;1.00E+00	33994;36375;74720;75794	5.09E-01;4.29E-01;8.99E-01;3.73E-02
ZNF410	-2.60682	0.642147	4	TAGCCTCCGAAAACATCTGG;GGGAAGACCTTCTCTCAGAG;GCTGGGAATTCATAGACACC;GTACAGTTGAAGGTTGTGAC	-4.45;-2.48;-1.78;-1.72	2652;36755;48163;49073	9.09E-01;4.28E-01;4.39E-01;7.93E-01	28369;29279;40687;74790	4.28E-01;4.79E-01;5.60E-01;6.05E-02
GLIPR2	-2.10151	0.568481	4	TGAAGGCCCACAATGAGTAC;GATCATAGGATGCCCATGCA;GCTCTGCAAGAACCTCAACC;GTTTCATAATGAGGTCCTGA	-2.74;-2.61;-1.86;-1.19	31835;34326;46869;57307	4.74E-01;4.37E-01;4.56E-01;5.23E-01	20135;30573;43128;45620	3.75E-01;4.65E-01;5.14E-01;9.19E-01
GLIPR1	-2.64434	0.793891	5	AGCCCAAATTGCAAAAGCAT;CCATAACAAGTTCCGATCAG;TTCGTCATACCAGTTTGTGA;AGTCTGTGGCCACTACACTC;CAAGGCAGGCAGATCACCTG	-4.62;-4.06;-3.19;-0.82;-0.53	1602;6434;21918;62500;65843	1.02E+00;1.27E+00;9.34E-01;3.88E-01;3.52E-01	11599;14942;55518;71000;75840	4.07E-01;7.08E-01;5.30E-01;5.32E-01;4.54E-02
SSSCA1	-3.24912	1.06504	4	ACAGCGGAAAATCTACTGCG;ACCTCGTCCGGAGCACTGTG;GACGTGGATAAAGATAATCC;ATGGGCGACTATCTGCTGCG	-4.31;-4.17;-3.3;-1.22	3803;5159;19612;56783	7.72E-01;1.63E+00;1.31E+00;5.39E-01	20659;57852;72283;73636	3.76E-01;6.69E-01;6.64E-01;8.75E-02
POU4F1	-2.73892	0.628467	4	CACCCGCATATGCACAGCCT;GATGTGGTCCAGCAGATCGC;ACGGCACGCTGTTCATCGTG;GTCCATCTGCGACTCGGACA	-3.85;-3.52;-2.04;-1.55	9379;15054;44141;51703	4.83E-01;8.32E-01;4.97E-01;7.02E-01	25739;33301;62369;68055	4.03E-01;4.43E-01;3.91E-01;2.24E-01
POU4F2	-2.16986	0.447521	4	AGCAGCTCGAGCAACGCTGG;TTGGTGCATGGGGTTCATGG;TTGCAGAGCAATATATTCGG;GAATACCATCCCGTGCACGT	-3.67;-2.91;-1.11;-0.99	12206;28298;58416;60240	4.24E-01;4.91E-01;3.75E-01;4.36E-01	17202;19026;49144;65240	3.79E-01;6.86E-01;4.28E-01;2.98E-01
POU4F3	-1.77929	0.67325	4	GGTCTGACTCCACGTCGCTG;CAGATCCATCCACACCACCT;TGCTCCACTACGTACCTGCG;CACGCTGCTCATGGTATGGT	-2.69;-1.87;-1.55;-1.01	32882;46795;51790;59871	4.90E-01;4.65E-01;4.02E-01;4.47E-01	17571;25652;30647;44560	3.77E-01;5.31E-01;8.24E-01;9.60E-01
FBF1	-1.87002	0.595462	5	AGCTCATCGAGAGTGCACAC;AGACATGCGCAGAGACCACG;AGACGGAAGTGACTTCTTGG;AGTAGGTTCTTCGCAGACAG;TCCTGCCTCAGCCTCCCGAG	-4.15;-1.84;-1.78;-1.18;-0.4	5367;47250;48165;57352;67218	5.85E-01;6.56E-01;4.64E-01;4.09E-01;3.07E-01	10224;20090;29286;30192;72067	4.26E-01;5.63E-01;6.80E-01;1.15E+00;1.56E-01
RASA4	-1.975	0.703858	8	GACGGAGGTCGACCCCGATG;TGTAGCGCACTCGGACGAAG;GATTGATGTCCAGAGACTGC;TGACATAGAAAGCCACAGCG;GGACACGGGAGACCTCGGTG;CCGACCAGTCCAAGAGCCGG;GGAGCTGAGTCGCACCAGTG;CAAGGCAGGCAGATCACCTG	-4.32;-4.22;-2.23;-1.48;-1.25;-1.21;-0.55;-0.53	3716;4641;40977;52742;56369;56988;65606;65843	5.65E-01;1.16E+00;7.17E-01;8.07E-01;6.37E-01;5.08E-01;4.17E-01;5.64E-01	11599;11836;20456;21073;24700;36465;72797;73729	4.15E-01;6.17E-01;6.52E-01;9.68E-01;1.23E+00;1.07E+00;5.07E-01;1.71E-01
RASA1	-2.86023	0.718599	4	ATCGCCAGGAGTATTATCTG;AATTTAAGAACAGATGAACA;ATTTACGGAAAAGTAGTCCA;GGATGGACCAGAATACGAGG	-3.32;-3.05;-2.77;-2.31	19273;25287;31325;39719	3.75E-01;5.37E-01;8.02E-01;1.16E+00	37754;46131;52152;58195	5.81E-01;4.58E-01;3.99E-01;4.96E-01
RASA2	-1.91919	0.676592	6	AGGATCGACTTGTGGAACAA;AGATATCACACATTACAGTG;TTAGCATCAAGGCATGCCAT;GTGCAGCAGCAGTCGTACAA;CAAGGCAGGCAGATCACCTG;GAGAATCGCTTGAATCCGGG	-4.46;-4.29;-1.43;-1.25;-0.53;0.44	2554;3985;53666;56251;65843;73043	7.76E-01;1.49E+00;7.15E-01;5.05E-01;3.99E-01;1.52E-01	4399;11599;21191;23776;73456;74888	5.94E-01;7.55E-01;8.04E-01;1.19E+00;6.25E-01;8.74E-02
RASA3	-2.04717	0.586772	4	ATCATCTTACCACGCCTCGT;TAAAACACTTCATCGAACTG;GCTCTTCCTACACTATGGCA;CTGACTATTACAGCCCTCTG	-4.4;-1.36;-1.23;-1.2	3058;54630;56669;57070	8.54E-01;5.87E-01;3.76E-01;5.30E-01	20372;20773;22812;74384	3.76E-01;6.36E-01;1.14E+00;7.00E-02
ACTN3	-2.77232	0.705788	4	GTCCAGGGCCTTGTTAACGT;CCATGGCTGGAGAACCGTGT;CAGTGAGCTGGACTACCACG;TGCAACTGGAGTTTGCCCGG	-3.16;-3.0;-2.47;-2.46	22791;26267;36919;37180	3.83E-01;5.21E-01;6.44E-01;1.27E+00	40245;40523;51164;54664	6.38E-01;4.28E-01;4.07E-01;6.05E-01
ACTN2	-2.61595	0.568744	4	AGGACTTCCGGGATTACCGC;CCAGGTTAATATTTCCTATG;CGAGTCGGCGTCGCTGACAG;TGATGGTCCAGATCATACCC	-3.44;-3.0;-2.29;-1.73	16594;26346;40011;48856	3.81E-01;5.20E-01;5.74E-01;8.00E-01	28586;37412;51103;60839	4.31E-01;4.27E-01;4.08E-01;4.19E-01
ACTN1	-1.71557	0.640804	6	GGCCCTAACTCAGAAGCGAA;GCAGGGCCTTGATCTCCGAG;GCCGAGGCGGGCAGATCACG;AAAGGGAAAACAGGCCGAAG;CAGGACATCAACAATGCCTG;GGATCCGCCGCACAATCCCG	-4.54;-3.68;-1.91;-1.46;-0.11;1.41	2006;12082;46089;53083;69727;75217	8.65E-01;7.32E-01;5.53E-01;4.85E-01;4.51E-01;7.59E-02	2225;7715;24359;31359;65365;75436	8.27E-01;1.01E+00;6.98E-01;8.45E-01;3.97E-01;6.84E-02
ACTN4	-1.72662	0.628587	4	ACAGATCGAGAACATTGATG;GTTCATCGTCCATACCATCG;ACTCCCACAATGTCAACACC;TGGGCGGCTTGTGCACACGC	-3.43;-1.44;-1.31;-0.72	16757;53402;55421;63657	3.80E-01;5.61E-01;3.80E-01;3.41E-01	13785;22021;24040;60696	4.03E-01;6.05E-01;1.08E+00;4.23E-01
EZR	-3.03677	0.793709	4	CTTTATTATCCACATAGTGG;CAAACTTACCAGGGACCAGT;TGCGGCGCATATACAACTCA;GGCAGTAGATCTCATCGCTA	-3.81;-3.69;-2.92;-1.73	9979;11892;28128;48870	4.68E-01;9.94E-01;9.13E-01;8.00E-01	28572;49292;65540;67477	4.31E-01;4.93E-01;4.29E-01;2.39E-01
PRR29-AS1	-1.50474	0.490823	1	GAGTCTCACCTTCCTTCACG	-1.5	52430	0.169	25012	0.491
LOC107985365	-1.88236	0.435085	2	CACCTGAACCTGGGAGACAG;CAAGGCAGGCAGATCACCTG	-3.23;-0.53	21108;65843	4.02E-01;1.41E-01	11599;56348	5.94E-01;2.76E-01
N6AMT1	-1.76835	0.637961	5	ACGCCGTTCCACGGGCACGT;CAGCGACGTGTACGAGCCCG;ACTTACATGTACAAAGCCTG;GGTGGAGTCACTACATAGGG;CAAGGCAGGCAGATCACCTG	-3.44;-2.87;-1.25;-0.75;-0.53	16598;29098;56404;63317;65843	3.89E-01;4.64E-01;5.45E-01;3.90E-01;3.52E-01	11599;14125;21038;48326;60845	4.07E-01;7.40E-01;9.73E-01;5.45E-01;5.24E-01
OR5J2	-2.95131	0.823084	4	TTTACGCCATTACCTTGTTG;AGGCTTCTTACTGTCAGTGA;CATGTCTGATAGAAAGTGTG;TTGTTGCCTTCACAACCAGG	-4.06;-3.49;-3.45;-0.81	6503;15644;16349;62594	5.88E-01;8.07E-01;1.53E+00;3.70E-01	14848;61083;61782;70928	3.93E-01;7.78E-01;3.86E-01;1.53E-01
LOC105375773	-1.52854	0.484514	1	GGAATCTCACTCTGTCACCC	-1.53	52067	0.172	25378	0.485
LOC105375779	-1.91411	0.392609	1	GCCGAGGCGGGCAGATCACG	-1.91	46089	0.225	31359	0.393
LOC107985367	-3.19661	0.548626	1	GGAACTTTGATTGTGATACG	-3.2	21895	0.549	55559	0.144
RPS10P26	-1.74314	0.538364	2	TGGACGGCTACGGCGTAGGG;GTGGCAGGCACAATCTCCGG	-2.13;-1.35	42627;54739	3.05E-01;3.01E-01	22705;34823	3.83E-01;6.94E-01
ABLIM1	-2.00637	0.808523	12	TCTTTCGGACTGGACGACAT;GGTGACTTCACACGCCATAA;TGTTACATACACGCCCACGT;TAAGCAATCTACGAAGACCG;CCAGGGTTTATGTGTCAGGG;GCCGAGGCGGGCAGATCACG;GAATTGTCCACAGTCAGCAA;TCTAACTCCAACTTACGCTC;CCACCCTGACACATAAACCC;TTCACACGCCATAATGGCAC;CAAGGCAGGCAGATCACCTG;AATGCTGGACCCAACACAAA	-3.43;-3.32;-2.82;-2.68;-2.44;-1.91;-1.91;-1.9;-1.64;-1.46;-0.53;-0.03	16825;19277;30080;33140;37483;46089;46134;46316;50346;53089;65843;70309	7.54E-01;6.31E-01;8.12E-01;7.20E-01;6.89E-01;7.43E-01;6.43E-01;6.75E-01;7.09E-01;8.25E-01;5.20E-01;5.04E-01	7133;11599;24358;27095;31126;31297;31359;39969;44304;47362;58151;60599	4.18E-01;5.34E-01;6.41E-01;6.26E-01;6.43E-01;7.44E-01;9.77E-01;8.64E-01;9.46E-01;1.14E+00;8.93E-01;1.28E+00
LOC105371064	-1.91411	0.392609	1	GCCGAGGCGGGCAGATCACG	-1.91	46089	0.225	31359	0.393
ABLIM3	-1.19257	0.985312	4	GGAAGTGGTTGTTGTGCACG;AGGTCACCTTGTCTCCAATG;CAAGGTTAAGTCTATCTACG;TGGGGGAGTCTATGTACCCC	-1.64;-1.52;-1.32;-0.29	50328;52177;55270;68250	9.52E-01;5.38E-01;3.81E-01;2.19E-01	9192;22172;25265;27114	4.88E-01;6.01E-01;1.03E+00;1.82E+00
ABLIM2	-2.54064	0.682376	6	AGGTCGGAGTGTAGCGCCCG;CTTACATAAATCACACGGCT;GCTGTGAGAAATACATCACG;GTGAGTAGGAGATCATGTCG;CAAGGCAGGCAGATCACCTG;TCCTGCCTCAGCCTCCCGAG	-4.31;-3.71;-3.42;-2.86;-0.53;-0.4	3760;11502;16993;29295;65843;67218	6.44E-01;7.60E-01;9.98E-01;9.25E-01;3.99E-01;3.69E-01	10224;11599;48128;60458;65941;73677	4.09E-01;7.55E-01;5.84E-01;5.72E-01;3.99E-01;1.30E-01
LOC105371069	-1.91411	0.392609	1	GCCGAGGCGGGCAGATCACG	-1.91	46089	0.225	31359	0.393
FAM172A	-0.924485	1.65538	10	TAAGTATGTACCTTTCAGTG;CGGGGCCCTACATTGCCCTG;AGCTAAGCGTCGCCAACATG;AAGATACGAGGCTCTAGGAG;AGAGTTGCAGCAATTGGCCA;TTCAACCTTAAGACCACTGG;TCATGGTAGTGGTGTTGTCA;AGTTAAGACACATAAAAACT;GAGAATCGCTTGAATCCGGG;TCCCACAGCGATCCCCACAT	-3.74;-2.73;-1.86;-1.53;-0.49;-0.43;-0.06;0.27;0.44;0.87	11028;31992;46981;52025;66345;66957;70092;72385;73043;74291	4.47E-01;9.66E-01;1.41E+00;1.27E+00;2.15E+00;1.53E+00;1.29E+00;9.52E-01;4.74E-01;1.80E-01	3151;4399;5057;7350;10485;11097;25417;30461;45450;66409	5.53E-01;1.04E+00;1.68E+00;2.03E+00;2.26E+00;3.01E+00;1.83E+00;2.02E+00;1.47E+00;6.67E-01
LINC00630	-1.52854	0.484514	1	GGAATCTCACTCTGTCACCC	-1.53	52067	0.172	25378	0.485
NO_CURRENT_178	-2.46633	0.619903	4	GGTTAACATCGCCACTCTGA;GGTGTCACCACCGCTTACCA;GGTGCTTAGCTCTGCGCACA;GGTGCGGTCTGCTTGTAGAT	-4.62;-2.45;-1.61;-1.19	1564;37446;50806;57314	1.12E+00;4.27E-01;4.11E-01;5.23E-01	20128;26636;39996;75878	3.75E-01;5.15E-01;5.74E-01;3.54E-02
RPS10P22	-1.35321	0.532849	1	GTGGCAGGCACAATCTCCGG	-1.35	54739	0.151	22705	0.533
LINC00639	-0.533336	0.82455	1	CAAGGCAGGCAGATCACCTG	-0.53	65843	0.0705	11599	0.825
BIVM-ERCC5	-1.95889	0.806065	12	GACTCAATATCTATCGCTTG;AACATTCAGGACACATCCGA;AAATGTCACTTGTTCACGTG;TTAATGGCTGAAAGAGTCCG;TTAGGTTTGGTCCTTTCACG;TTATCAATTTCCCATGCGAG;AAAATCGAAGGCAGGCCCGT;ATAATTTCCGATGTACTAGT;AAGTATTAGACCTCAGACGA;ACGTAGCCAGCACTAATGAG;GGGCAAGCTACCTCTCGCAT;GGAACCAATGGAAATTGACT	-3.76;-3.61;-3.44;-3.42;-3.3;-2.97;-2.82;-2.56;-2.27;-0.43;1.47;3.59	10821;13411;16622;17044;19574;26856;30241;35428;40325;66905;75278;76824	4.95E-01;5.29E-01;6.07E-01;7.99E-01;9.74E-01;9.04E-01;1.04E+00;1.08E+00;1.17E+00;5.48E-01;6.10E-01;4.17E-02	618;2164;10537;37103;42021;47187;50601;57878;60401;60814;64042;66617	1.06E+00;1.41E+00;8.28E-01;8.50E-01;8.07E-01;7.74E-01;6.96E-01;7.07E-01;6.01E-01;5.66E-01;5.90E-01;7.85E-01
TSPOAP1-AS1	-1.73056	0.629528	4	AGGACAGCTGGGTCTCCAAG;GATGCATATCTACAAATGAA;TGAAGCGGCTTACCCATCAA;AGACGGTGCCGAAGGACCTG	-2.92;-2.29;-1.13;-0.59	28114;40018;58190;65281	4.26E-01;4.27E-01;3.75E-01;2.97E-01	12160;19252;37443;49348	4.25E-01;6.79E-01;6.32E-01;7.83E-01
RAB6A	-3.14139	0.978771	4	GATCTTGCTGACAAGAGGTA;ATAAACAACAACTGCCACAG;GTGTTCCTGGGGGAGCAAAG;GGGACACAGCAGGTCAAGAG	-4.25;-3.79;-3.53;-0.99	4326;10302;14741;60100	7.26E-01;1.10E+00;1.65E+00;4.40E-01	17342;62719;67134;73115	3.78E-01;8.47E-01;4.60E-01;9.99E-02
RAB6B	-0.888712	1.36118	5	TCGACAACACATACCAGGTG;GATATTAGGTGCTCACCGTG;TCGACGACGTCAGGACAGAG;CAAGGCAGGCAGATCACCTG;TCCACTGAGAAAATTCAAGT	-2.05;-0.89;-0.61;-0.53;-0.36	43971;61635;64956;65843;67579	1.00E+00;1.27E+00;8.14E-01;4.07E-01;2.96E-01	9863;11599;12486;15807;33471	4.33E-01;8.61E-01;1.53E+00;2.16E+00;1.82E+00
RAB6C	-3.03662	0.989517	6	ACTTGGAGGATGGAACAATC;GCAGAATCACGGATGTACCT;GATGTTATCATCACGCTAGT;ATTGAAACTAGGGCAAAAGC;TGTACCTGGGAATGAGGCTA;CAAGAGGCAAGTGTCAGTTG	-4.69;-4.13;-3.21;-2.88;-2.84;-0.46	1197;5635;21483;28929;29693;66623	1.07E+00;1.23E+00;7.93E-01;9.41E-01;1.51E+00;3.92E-01	10819;47727;48524;55975;71799;76245	4.03E-01;9.08E-01;5.91E-01;5.02E-01;5.24E-01;4.06E-02
LOC102724181	-1.03094	0.781511	2	GGAATCTCACTCTGTCACCC;CAAGGCAGGCAGATCACCTG	-1.53;-0.53	52067;65843	3.56E-01;1.41E-01	11599;25378	5.94E-01;9.69E-01
DLGAP4-AS1	-1.86436	0.609482	5	CCTTGTCAATGAAGCCATCA;CCCCACAGACGAATACCTGG;ACATTGGATGTGGCCCGCTG;CGTTGCGAATCACATCCTCG;CAAGGCAGGCAGATCACCTG	-3.37;-2.52;-2.29;-0.61;-0.53	18173;36136;39979;64983;65843	3.95E-01;4.81E-01;4.92E-01;3.99E-01;3.52E-01	11599;12459;37463;41308;59283	4.07E-01;8.16E-01;5.20E-01;7.24E-01;5.80E-01
UBE2Q2P11	-0.66483	0.879696	2	GAAAACGGACTCGTTGATGG;TGGAAAGGCGCATTGTACCC	-2.37;1.04	38713;74647	3.01E-01;3.19E-02	2795;38729	1.16E+00;6.02E-01
DAOA	-3.51489	1.42998	4	AGGTTACCTTTCACAAGACC;TAACCAATGGAACATGGGAA;TGAGGAAGGTAAGAGACCCA;AAGGTGATGACACTTGACTC	-4.93;-4.52;-2.82;-1.78	419;2100;30171;48073	1.67E+00;2.38E+00;8.40E-01;8.28E-01	29369;47271;75345;77023	4.40E-01;4.69E-01;1.00E+00;9.40E-03
UBE2Q2P12	-0.66483	0.879696	2	GAAAACGGACTCGTTGATGG;TGGAAAGGCGCATTGTACCC	-2.37;1.04	38713;74647	3.01E-01;3.19E-02	2795;38729	1.16E+00;6.02E-01
ERVV-1	-1.88922	0.662285	8	ATAGGAATGATCGCCCCATG;CATAAAAATACATAGCCAGG;AATAGTTTGATTGCATGCAG;AACTTATTCAACCCCCCCTG;AAGGAAAAGAGCTAATCACA;GACACCAGTGAGTCAAGTTA;CAAGGCAGGCAGATCACCTG;GAAAAGAGCTAATCACATGG	-3.68;-2.92;-2.58;-2.34;-2.12;-1.36;-0.53;0.42	12093;27991;34954;39179;42868;54692;65843;72974	4.20E-01;6.06E-01;5.92E-01;5.63E-01;5.87E-01;5.23E-01;4.15E-01;2.06E-01	4468;11599;22750;34574;38263;42488;49451;65349	5.16E-01;6.25E-01;6.03E-01;5.83E-01;6.71E-01;8.08E-01;9.02E-01;5.90E-01
ERVV-2	-1.48209	0.799206	8	ATAGGAATGATCGCCCCATG;CATAAAAATACATAGCCAGG;AATAGTTTGATTGCATGCAG;AAGGAAAAGAGCTAATCACA;GCCGAGGCGGGCAGATCACG;GACACCAGTGAGTCAAGTTA;GAAAAGAGCTAATCACATGG;AACCTATTCAACCCCCCCTG	-3.68;-2.92;-2.58;-2.12;-1.91;-1.36;0.42;2.29	12093;27991;34954;42868;46089;54692;72974;76075	4.20E-01;6.06E-01;5.92E-01;5.83E-01;5.57E-01;5.23E-01;5.16E-01;6.18E-02	1367;4468;22750;31359;34574;42488;49451;65349	9.04E-01;1.19E+00;6.03E-01;6.27E-01;7.73E-01;8.08E-01;9.02E-01;5.90E-01
LOC105374425	-1.09449	0.914942	4	CCTACGAGTCCTGTATGGCT;GGAATCTCACTCTGTCACCC;CAAGGCAGGCAGATCACCTG;GAGAATCGCTTGAATCCGGG	-2.76;-1.53;-0.53;0.44	31426;52067;65843;73043	4.68E-01;5.36E-01;4.34E-01;1.02E-01	4399;11599;25378;46018	7.20E-01;1.01E+00;1.02E+00;9.04E-01
GDI2	-3.09742	1.05491	5	GATCACCACCCGAGTCAATG;TCTTACCTTGCAAATCCTTG;TAAGATGCTGCTTTATACAG;GATCGAAACCCTTACTACGG;CAAGGCAGGCAGATCACCTG	-4.24;-3.79;-3.52;-3.41;-0.53	4443;10246;15046;17315;65843	6.45E-01;9.42E-01;1.32E+00;2.01E+00;3.52E-01	11599;60140;62410;67198;72998	4.07E-01;1.17E+00;7.05E-01;4.26E-01;1.28E-01
GDI1	-2.36988	0.501801	4	CAACGCCCTCAAAGGTCTTG;CTTCCCCTCACTCATCAGTG;ATATATGCTGAACAAACCTG;GCCTCGGCCCATCGACTCAG	-3.37;-3.34;-1.57;-1.2	18125;18641;51405;57147	3.76E-01;6.98E-01;4.05E-01;5.28E-01	20295;26037;58824;59301	3.75E-01;5.25E-01;3.75E-01;4.64E-01
TTC30A	-1.85014	0.576422	4	GCGAACATCAAAGCCCTCGG;GGAGGCGACAATGAGACCGA;AGCTGTCTGGCAAGTGATCA;CAAGGCCTGCCTTTATCCGG	-2.99;-2.93;-1.12;-0.36	26641;27781;58225;67602	4.11E-01;4.98E-01;3.75E-01;2.36E-01	9840;19217;49649;50801	4.71E-01;6.80E-01;4.22E-01;7.32E-01
SPG21	-2.65178	0.56289	4	AGAGGACACCTGATACTTCG;AGGATTAGGGAATGGACTCT;TAATACTTACAGCGATAACC;TGGCCCGGTGGACCCTATGA	-4.11;-3.06;-2.61;-0.83	5867;25011;34429;62274	6.21E-01;5.42E-01;7.09E-01;3.79E-01	15168;43028;52448;71577	3.90E-01;4.37E-01;3.97E-01;1.37E-01
TFAP4	-2.91779	0.802638	4	CACTAACCCCCGAGACTCAG;CGCATGCAGAGCATCAACGC;AGGCTCCCCGGACATCTGGG;ACAGCTCAAGCGCTTCATCC	-4.64;-3.74;-2.29;-1.0	1452;11050;40086;60056	1.15E+00;1.05E+00;5.72E-01;4.42E-01	17386;37356;66396;75990	3.78E-01;4.27E-01;4.44E-01;3.29E-02
SPDL1	-2.51391	0.585015	4	TTCTTACTATAATGCCCTAG;AGAGTACCAGAGTCGACTGA;TTTGTAGGTGGAAGATCGAA;GTTCCTCTGATTTACAAGAG	-3.08;-2.97;-2.02;-1.99	24403;27010;44480;44902	3.93E-01;5.09E-01;4.91E-01;9.47E-01	32542;32956;50420;53057	4.85E-01;4.45E-01;4.14E-01;6.57E-01
LOC728825	-0.693909	0.760798	1	ATATTAATTTGAAGGTGGCG	-0.69	64008	0.0827	13433	0.761
LOC107984548	-1.40634	0.518365	1	TCGCCCAAGCTAGAGTGCAG	-1.41	53961	0.157	23475	0.518
NAPEPLD	-2.63617	0.761295	5	ATGGGAGATTTGTGAATCCG;TAAGGACCGCATCTATTGGA;GAAGCACGAGAGCTAAAGAT;AAGTGACCTTATCATGTCCG;TCCTGCCTCAGCCTCCCGAG	-4.68;-4.14;-2.58;-1.39;-0.4	1279;5555;34907;54264;67218	1.11E+00;1.39E+00;5.59E-01;4.43E-01;3.07E-01	10224;23178;42535;71880;76163	4.26E-01;5.11E-01;4.73E-01;5.74E-01;3.61E-02
SPTA1	-2.63009	0.59395	4	CCCTTGGACATACCCCGTCA;TCGGCTAAGGGATATCAACA;CTGACCTGTCTAGTACACGT;AGTGTGCTGACATCTTAGAG	-3.28;-3.13;-2.26;-1.85	19993;23268;40614;47138	3.75E-01;5.77E-01;5.62E-01;8.62E-01	30304;36828;54152;57449	4.52E-01;4.28E-01;3.86E-01;5.19E-01
HGSNAT	-1.85726	0.572357	4	ATGACTTCTATACTGCAACG;ACCAGGATGAGCAGCCACTG;TTTCCAGTAGACGGTCAAGT;AGCAGGACAGACCCTCTCGA	-2.95;-2.66;-1.76;-0.06	27364;33391;48484;70079	4.18E-01;4.43E-01;4.35E-01;1.74E-01	7363;28958;44051;50056	5.50E-01;4.83E-01;4.98E-01;7.58E-01
CRYZL1	-1.38705	0.987023	5	TCTGAGCCAGATAAATACAA;AGAGTACATGAGCATTACTT;TAATATTACCCACCTATGGG;AGCTGTTTGGAAGAAACAGG;CAAGGCAGGCAGATCACCTG	-1.85;-1.83;-1.67;-1.05;-0.53	47070;47373;49856;59357;65843	1.14E+00;6.59E-01;4.70E-01;3.95E-01;3.52E-01	11599;18085;27586;30069;30372	4.07E-01;6.10E-01;7.27E-01;1.16E+00;2.03E+00
SERF2	-2.48426	0.537789	4	CAGCAGAAAGCCCGTCATCT;GGGCTACCTCTGCTTGCGGG;TCTGGCGGGCGAGCTCACGC;TATGAAAAAGCAGAGCGACT	-3.3;-2.96;-1.97;-1.71	19732;27211;45150;49168	3.75E-01;5.06E-01;4.81E-01;7.89E-01	28282;32292;50210;57722	4.27E-01;4.50E-01;4.16E-01;5.11E-01
OR4L1	-2.17414	0.473947	4	TTGCATTGAAACATACACCC;CCCACACAGAGATGGTCTTG;ATATGTTGTTTATGACATTG;TGAGCCACAAGCTGCTAAAG	-4.26;-2.12;-1.76;-0.55	4178;42746;48494;65646	7.38E-01;4.35E-01;4.35E-01;2.87E-01	11796;28948;34696;73268	4.30E-01;4.83E-01;7.02E-01;9.62E-02
NAT8	-2.76202	0.643235	4	AAATCCTACCTGAGTGAGCG;CCTTGCCAAAAAACCCTGGA;CCAGGAGAGCGACCGCCAGT;CAGCTTCAGCAATTGCCGGA	-3.78;-3.49;-2.93;-0.85	10422;15609;27881;62071	4.57E-01;8.09E-01;9.23E-01;3.84E-01	15371;49582;61824;67017	3.88E-01;4.97E-01;3.87E-01;2.51E-01
IGFL2	-1.96457	0.630999	9	CAGTGTTCAAAAGGAACTAC;CTGACACATAAGCAGGAGCT;CTCCTGTTGGCTCAGGACTG;TGTAACAGCACTGCTCCAAG;GCCGAGGCGGGCAGATCACG;TTGTGTCCAAGGGAAGTCAT;TTAAAGGAGACCCGCCGCTG;TTGTTCCCACACCTGGGTGT;CTGAGCGAGACCCGCCAATG	-3.94;-3.57;-3.5;-1.91;-1.91;-1.55;-1.26;-0.85;0.82	7977;14001;15430;46081;46089;51756;56179;62033;74189	4.11E-01;5.36E-01;7.57E-01;7.64E-01;5.97E-01;5.64E-01;5.42E-01;5.18E-01;1.68E-01	3253;15409;21263;25686;31359;31361;62012;63454;69455	5.72E-01;5.21E-01;5.96E-01;6.92E-01;7.64E-01;1.11E+00;5.20E-01;4.81E-01;4.25E-01
NAT2	-3.16624	1.0342	4	TAGAGGCTGCCACATCTGGG;TGTGGTCTGAAAACCGATTG;ATTGTAAGAAGAAACCGGGG;TAACAAATACAGCACTGGCA	-4.47;-4.22;-3.11;-0.87	2482;4649;23850;61831	9.35E-01;1.72E+00;1.09E+00;3.91E-01	15611;53593;72789;74960	3.87E-01;5.65E-01;7.00E-01;5.66E-02
NAT1	-1.92319	0.512698	4	CGGAAGACACAAGGCACCTG;TTGGACGCTCATACCAGATG;GAACCTTAACATCCATTGTG;GTTGTGAGAAGAAATCGGGG	-3.45;-2.7;-1.87;0.32	16381;32691;46786;72608	3.82E-01;4.47E-01;4.57E-01;1.12E-01	4834;30656;44751;61064	6.87E-01;4.64E-01;4.87E-01;4.13E-01
NAT6	-2.34651	0.461198	4	AGGGTAAGCTCAGTTGGACC;GCGGGCATGGCCCACCACAA;CTACACTAGACCCTACACAC;TGAGGTCAGCACAAGCATCC	-3.77;-3.01;-2.62;0.01	10639;26016;34224;70946	4.53E-01;5.25E-01;7.15E-01;1.52E-01	6496;43205;51423;66803	5.88E-01;4.38E-01;4.05E-01;2.57E-01
LOC107986597	-2.54731	0.337814	1	GCTCCCGGTCAGCCTGTCCG	-2.55	35576	0.338	41856	0.267
LOC100996316	-2.41352	0.383208	2	CATTCAGCCTAGCACTGAAG;GGAATCTCACTCTGTCACCC	-3.3;-1.53	19656;52067	4.22E-01;3.45E-01	25378;57781	3.56E-01;2.54E-01
ADGRL4	-2.89165	0.815338	5	TGAATTTGTATCAAACTCTG;AATGTGTCAGGTGATTACAG;ATTTACATTAAGTCATCGAA;TGAAGCCTGCTATTGCAACA;TCGCCCAAGCTAGAGTGCAG	-3.91;-3.63;-3.6;-1.91;-1.41	8406;12983;13469;46224;53961	4.65E-01;7.90E-01;1.44E+00;5.92E-01;7.84E-01	23475;31218;63972;64459;69033	4.47E-01;4.61E-01;7.68E-01;3.95E-01;2.50E-01
LOC107986594	-0.399969	0.87935	1	TCCTGCCTCAGCCTCCCGAG	-0.4	67218	0.0615	10224	0.879
ADGRL2	-1.49024	1.00096	9	CTCTTCGATTTGAAGCAACG;GTGGCCCAAGTGTTTGAACG;GAGCGCTAACTATGGTCGGA;GCCGAGGCGGGCAGATCACG;GGAATCTCACTCTGTCACCC;TCGCCCAAGCTAGAGTGCAG;CAAGGCAGGCAGATCACCTG;AGCTGGACGGAGTTATAACA;TCTTTAACAAAGAAAGAACG	-3.42;-2.45;-2.09;-1.91;-1.53;-1.41;-0.53;-0.44;0.37	16932;37389;43361;46089;52067;53961;65843;66840;72768	5.63E-01;1.08E+00;9.70E-01;7.65E-01;7.00E-01;5.72E-01;5.86E-01;4.21E-01;2.43E-01	4674;10602;11599;23475;25378;31359;34074;40053;60521	4.81E-01;6.18E-01;9.72E-01;7.57E-01;1.01E+00;1.11E+00;1.44E+00;1.65E+00;9.64E-01
ADGRL3	-2.2739	0.786008	7	AGGCAAATCTGACATAGACC;ACAGGTTATTGGTCAACACA;CAAAGTTGTGGTCCGAAGGG;AGGCATCTGGCAGATAACAT;CAAGGCAGGCAGATCACCTG;TCCTGCCTCAGCCTCCCGAG;GAGAATCGCTTGAATCCGGG	-4.2;-4.04;-3.81;-3.38;-0.53;-0.4;0.44	4876;6711;9928;17846;65843;67218;73043	5.25E-01;9.99E-01;1.37E+00;1.35E+00;6.79E-01;4.03E-01;1.78E-01	4399;10224;11599;59584;67525;70731;72567	5.53E-01;7.44E-01;1.21E+00;8.23E-01;7.61E-01;4.53E-01;1.98E-01
ADGRL1	-1.19914	1.01242	5	TGTTGAAGGCATAGTCCACG;TCGCCCAAGCTAGAGTGCAG;AGCCGGCAAGAACTACAACA;ACGGACGCGCATCAAGAGCG;CCTTCAAGATCATGTCACAG	-2.89;-1.41;-0.91;-0.63;-0.16	28683;53961;61296;64809;69306	5.36E-01;8.69E-01;6.66E-01;3.98E-01;2.41E-01	8136;12633;16146;23475;48739	4.72E-01;8.07E-01;1.25E+00;1.53E+00;1.01E+00
LOC100996318	-3.08261	0.837479	4	ATGGGCAGCAAGACCCTGCG;TGTGACATCCCCACTCCTGG;TCCAGCAGAGTCTTCATGGA;GCTTTCCCATGCCTGAGCAA	-3.62;-3.17;-3.09;-2.46	13224;22575;24207;37222	4.09E-01;5.92E-01;1.08E+00;1.27E+00	40220;53213;54884;64214	6.37E-01;5.57E-01;3.82E-01;3.25E-01
FAIM2	-2.77409	0.718821	4	CCCAGGATCACTTACAAAGA;TATGACAACGGTTTCCCCAC;CCTGGACATAGTCCTTGACA;GGTGACTGAGAGGCAGACAA	-3.79;-3.69;-3.17;-0.44	10290;11889;22358;66821	4.60E-01;9.94E-01;1.16E+00;2.56E-01	10621;55082;65569;67163	4.53E-01;5.97E-01;4.29E-01;2.47E-01
LOC105377818	-0.533336	0.82455	1	CAAGGCAGGCAGATCACCTG	-0.53	65843	0.0705	11599	0.825
LOC105372860	-2.09511	0.466854	2	GCGCGCCGGTCGCCCAGACA;TCTTCTGTCAGTCGATCACG	-2.35;-1.84	39135;47191	3.01E-01;4.30E-01	30251;38307	3.22E-01;6.11E-01
COX5A	-2.37068	0.510886	4	ACCACCCGGGCCGACCCTCG;GATGCCTGGGAATTGCGTAA;CAGGGGCCTTACCCACGGCG;TGAGGAGTTTGATGCTCGCT	-4.33;-3.16;-1.49;-0.5	3664;22715;52612;66174	7.86E-01;5.89E-01;3.96E-01;2.73E-01	11268;24830;54742;73778	4.40E-01;5.46E-01;3.83E-01;8.42E-02
COX5B	-2.77665	0.667922	4	ATGCGCTCCATGGCATCTGG;TCAGGACCCATACAATGTAC;GACTAAATTAGGGTCTTCCC;GCATCGCGGCCGCGCCACTG	-3.26;-3.19;-2.75;-1.91	20515;21985;31634;46186	3.76E-01;6.06E-01;7.92E-01;8.98E-01	31256;45825;55455;56891	4.65E-01;4.56E-01;3.80E-01;5.36E-01
TMEM258	-2.12254	0.523036	5	TGGGCTGGTATATCTGCTCA;AACTGCTGTGCCCAGTTACG;AAAGCACCACGGTCAGATGG;AGGATACACGAAGAACCAGG;CAAGGCAGGCAGATCACCTG	-3.3;-2.97;-1.96;-1.85;-0.53	19498;26935;45386;47145;65843	4.04E-01;4.74E-01;4.62E-01;5.71E-01;3.52E-01	11599;30297;32051;50494;57935	4.07E-01;4.62E-01;6.13E-01;5.02E-01;6.30E-01
TMEM257	-2.35144	0.454938	4	ATGATTGCATTAGAAAATAA;GAAATAGCAATATCCAGCTG;CAAAACAGAATATAGTCAGT;AAAAATCCTAAAATAAAATA	-3.5;-3.15;-2.38;-0.37	15403;22833;38485;67524	3.88E-01;5.86E-01;6.07E-01;2.38E-01	9918;38957;54626;62039	4.69E-01;4.26E-01;3.83E-01;3.85E-01
TMEM256	-2.2629	0.554145	4	CTTAGGCTTCGCTTCCTACG;GGTGCAGAATAAGGTCGTTC;ATTCCCAGATGCCTACGGGA;CAGGGAAAGATTACCCAGAG	-4.23;-1.85;-1.55;-1.42	4483;47090;51797;53758	7.13E-01;4.68E-01;4.02E-01;6.34E-01	23684;25645;30352;72963	3.88E-01;5.31E-01;8.34E-01;1.03E-01
TMEM254	-1.8878	0.543868	5	TCCACCAAGTACTGAGTGAA;TTCTGATAAGGGATACTCTG;AGTATCCCTTATCAGAACCT;GGCGCGACCTACTTTCAGCG;GAGAATCGCTTGAATCCGGG	-3.98;-3.42;-1.88;-0.6;0.44	7522;16969;46615;65044;73043	4.91E-01;6.41E-01;4.61E-01;4.00E-01;1.27E-01	4399;12398;30827;60490;69928	6.48E-01;8.19E-01;6.41E-01;3.90E-01;2.22E-01
TMEM253	-2.06834	0.479345	4	CCTGAACTCTGATTGTCACA;TTCATTGACCAGTACCTGGG;GCAGGCGACTGAGACAGCAA;TCTGGAAAAGCTACAACACT	-3.82;-2.71;-2.37;0.63	9741;32526;38768;73655	4.73E-01;4.48E-01;6.01E-01;8.71E-02	3787;38689;44929;67709	7.74E-01;4.26E-01;4.84E-01;2.33E-01
TMEM252	-3.07753	0.800583	4	CAGCACGTACCTGTCTACTG;GCTCCATATTCGACTGTCAG;CTGAAAGCAAAGGAGTGTTG;TCCAGAAAATTCCACTCAGA	-4.11;-3.19;-3.08;-1.92	5816;21999;24427;45937	6.24E-01;6.05E-01;1.07E+00;9.07E-01	31505;52993;55459;71626	4.69E-01;5.53E-01;3.80E-01;1.36E-01
TMEM251	-1.97766	0.521814	4	TTTCAAGGAGTGTGTCCATG;ATAGTAAAATGCTGCTGCAC;ATGAACTTCCGTCAGCGGAT;TGTCCACACCCAAAAAGGCA	-4.17;-1.68;-1.19;-0.87	5080;49737;57311;61782	6.69E-01;4.99E-01;3.75E-01;3.92E-01	15660;20131;27705;72365	3.86E-01;6.54E-01;9.29E-01;1.18E-01
TMEM250	-2.64269	0.606011	4	GGCTGCAGCTAAAGTAGAGT;CGCGAACGCCCAGGTACTGT;ACGTGTACATCAAGACGCGC;CTGTTCACTGCGGCGCTCTG	-3.92;-3.57;-1.74;-1.34	8254;14018;48799;54966	5.17E-01;8.80E-01;4.32E-01;5.96E-01	22476;28643;63416;69190	3.82E-01;4.87E-01;4.00E-01;1.96E-01
SIPA1L1	-1.77149	0.814274	7	CTTGCCAGAAGGGTCGATAG;ATGATGACTGCACCCCGCGG;GCCGAGGCGGGCAGATCACG;GTAGGAGGAAGAGGAAGAGG;AAAGATGACAAATCTGATCG;ACTAAGGGTAGACTCAAAGG;CAAGGCAGGCAGATCACCTG	-3.38;-2.11;-1.91;-1.76;-1.5;-1.21;-0.53	17909;43050;46089;48378;52576;56974;65843	4.76E-01;9.50E-01;7.03E-01;5.50E-01;5.05E-01;5.33E-01;4.93E-01	11599;20468;24866;29064;31359;34392;59511	4.02E-01;5.00E-01;6.09E-01;7.71E-01;1.09E+00;1.53E+00;8.01E-01
SIPA1L3	-1.23619	1.22365	8	GGTGTTCAACTGCTACTGCG;GCCGAGGCGGGCAGATCACG;GGAATCTCACTCTGTCACCC;ACCTCGTCCATCGACGTGCA;TTGAGGACGGCACTCCCCGG;CAAGGCAGGCAGATCACCTG;TCCTGCCTCAGCCTCCCGAG;CCAAGATGGCCCATTCCATG	-3.31;-1.91;-1.53;-1.29;-0.91;-0.53;-0.4;0.0	19362;46089;52067;55641;61288;65843;67218;70870	5.74E-01;1.36E+00;1.19E+00;9.31E-01;8.02E-01;6.25E-01;4.07E-01;3.08E-01	6572;10224;11599;16154;21801;25378;31359;58103	4.38E-01;6.80E-01;1.08E+00;1.28E+00;1.44E+00;1.80E+00;2.07E+00;9.98E-01
SIPA1L2	-1.96354	0.584093	6	GCTAGGCATGGTACCGCACG;GGAGATCTGCAAAGTAGCCG;CATGTGGCACGTGATAGCCC;GCCGAGGCGGGCAGATCACG;TGGCTACGAGGGCTAATGTG;CAAGGCAGGCAGATCACCTG	-3.56;-3.13;-1.94;-1.91;-0.7;-0.53	14203;23287;45738;46089;63893;65843	3.98E-01;4.89E-01;5.49E-01;5.11E-01;3.97E-01;4.23E-01	11599;13549;31359;31704;54153;63251	3.99E-01;6.72E-01;5.53E-01;8.33E-01;5.20E-01;5.27E-01
LOC105371887	-0.533336	0.82455	1	CAAGGCAGGCAGATCACCTG	-0.53	65843	0.0705	11599	0.825
LOC105371881	-1.52854	0.484514	1	GGAATCTCACTCTGTCACCC	-1.53	52067	0.172	25378	0.485
QKI	-1.4432	0.65568	4	GGGAGAATCCTTGGACCTAG;ATTCTTACGTGATTTAATGT;GGATGTAAAATCATGGTCCG;AAATAGAGGCAAGCCCAATT	-4.26;-3.71;-1.2;3.41	4188;11526;57047;76727	7.37E-01;1.02E+00;3.76E-01;1.61E-02	715;20395;65926;73259	1.44E+00;6.46E-01;4.35E-01;9.64E-02
SLC35F5	-2.32103	0.708992	4	CCCCCAAAAAGTCTCGTGTG;AATTTCACAGGCACATACAG;TCAGAAGGGCTCTTAAGACA;GCAGTATTTCCAAGTAACAG	-4.21;-4.08;-0.62;-0.37	4704;6239;64880;67492	6.96E-01;1.48E+00;4.18E-01;2.39E-01	9950;12562;71207;72744	4.68E-01;9.55E-01;6.01E-01;1.09E-01
SLC35F4	-1.71345	0.600974	5	ATTCTTGAACTTCAAAACCA;GATGACCAGAATAATAGACT;GCCGAGGCGGGCAGATCACG;TGCACGTCCATGGTTCTGAA;TCAGTCACTAGATGTAAACC	-3.73;-2.49;-1.91;-1.16;0.73	11218;36658;46089;57635;73944	4.12E-01;4.85E-01;4.62E-01;4.06E-01;1.00E-01	3498;19807;31359;40766;66211	7.26E-01;5.69E-01;6.29E-01;7.40E-01;3.40E-01
SLC35F6	-1.17683	1.03163	5	CCCATGTACTACATCCCCGC;CGGCTCCATCAACACGCTCT;GATGATCAACAGGTCCCCTG;CAAGGCAGGCAGATCACCTG;GGGACCAGCCTCATGTATGT	-2.64;-1.5;-1.02;-0.53;-0.19	33820;52520;59690;65843;69127	6.58E-01;8.15E-01;6.19E-01;4.07E-01;2.47E-01	8315;11599;17752;24922;43638	4.67E-01;8.61E-01;1.15E+00;1.44E+00;1.25E+00
SLC35F1	-2.10314	0.609458	8	AAATAAGGAGGGATAACACC;TTCGTCGTAAAATTGCCAGG;CATCCGAACTCTGAGCCGAG;GCCGAGGCGGGCAGATCACG;GCCAAGAAGCACAACAAAAA;CCTGGAAGCAAATTATCTGG;AAGATACGAATCTCTTAAGG;TCCTGCCTCAGCCTCCCGAG	-4.79;-3.14;-2.75;-1.91;-1.59;-1.54;-0.7;-0.4	800;23216;31569;46089;51097;51930;63919;67218	1.11E+00;5.28E-01;5.58E-01;6.27E-01;5.60E-01;5.59E-01;4.38E-01;4.92E-01	10224;13523;25512;26345;31359;45873;54226;76643	4.07E-01;5.69E-01;5.66E-01;7.50E-01;8.91E-01;6.97E-01;7.03E-01;3.60E-02
SLC35F3	-1.67488	0.764169	8	TCTTCCCGTTGTACTACGTG;GTGATGATGACCTACGCTGA;GCCGAGGCGGGCAGATCACG;GAGTGTCCAAAGAACACCAA;GGAATCTCACTCTGTCACCC;GGCTCACGTCCATCGAGGAG;CAAGGCAGGCAGATCACCTG;GAGAATCGCTTGAATCCGGG	-4.0;-3.48;-1.91;-1.85;-1.53;-0.54;-0.53;0.44	7201;15837;46089;47159;52067;65724;65843;73043	4.25E-01;5.28E-01;8.91E-01;6.48E-01;5.68E-01;6.21E-01;4.15E-01;2.03E-01	4399;11599;11718;25378;30283;31359;61617;70235	5.20E-01;6.25E-01;1.07E+00;7.83E-01;9.37E-01;1.36E+00;4.81E-01;3.39E-01
SLC35F2	-2.16329	0.516434	5	TGATAAAGCTCTGAAGCATG;TTGGTGCAGACATACTAGCA;ACAAGGACAACATCTGACCC;GCCGAGGCGGGCAGATCACG;CATGACAGAGCCATCAACAC	-3.24;-3.05;-2.42;-1.91;-0.2	20945;25263;38015;46089;69003	4.17E-01;4.87E-01;5.13E-01;5.95E-01;2.51E-01	8439;31359;39427;52179;56477	4.64E-01;4.62E-01;4.98E-01;4.73E-01;6.86E-01
SUPV3L1	-2.80411	0.822532	4	GCTTATGTACACAACGGGGG;GGAGAAACTAACCAGTTAGG;GCTACAGATGCAATTGGCAT;AGTCGGCAGATTGAAATTCG	-2.84;-2.84;-2.78;-2.75	29736;29764;30970;31590	4.45E-01;4.74E-01;8.14E-01;1.56E+00	45862;46472;47656;47701	7.94E-01;4.61E-01;4.45E-01;8.42E-01
LMAN1L	-2.96565	0.736729	4	AGACCCCAAAGAAACCTCCA;TTGTACTCAAACCTGCGTAG;GAGCACGGATCACCTACTGG;CAGGCCGTGTGGTACACCCG	-4.06;-3.63;-2.73;-1.45	6472;12967;32131;53355	5.90E-01;9.33E-01;7.77E-01;6.47E-01	24087;45292;64477;70972	3.91E-01;4.51E-01;4.13E-01;1.52E-01
TSPAN18	-2.27232	0.46725	4	GCAGCAGACACTTGTTCTCA;GGAGGATGTAGGCGCCCGTG;CATCGGCATCTGGGTCATGG;GAGCTCACCAAGCACTACCA	-3.36;-3.09;-2.64;-0.0	18389;24265;33788;70458	3.76E-01;5.56E-01;7.28E-01;1.64E-01	6984;43654;53178;59043	5.66E-01;4.40E-01;3.92E-01;4.71E-01
TSPAN19	-1.83923	0.607433	5	TATTCATGGGATTTGGTGCA;GGCATTCAGAATAGTCCACT;GCCAACATAATTACACAGAC;AATCAGATGGCTCCTAATTG;GAGAATCGCTTGAATCCGGG	-4.11;-3.44;-2.09;0.0;0.44	5821;16580;43358;70860;73043	5.61E-01;6.53E-01;4.69E-01;5.26E-01;1.27E-01	4399;6582;34066;60887;71620	6.48E-01;1.26E+00;5.73E-01;3.89E-01;1.70E-01
MPC2	-2.17774	0.474214	4	GCATCAGCTCCACTTTATCG;CCGTTGTACAACCATCCAGC;CTGGGCTCCAATTATGAAAT;TGATGCTGCCCGAGAAATTG	-3.89;-3.12;-2.64;0.93	8828;23684;33875;74423	4.99E-01;5.68E-01;7.25E-01;6.91E-02	3019;43582;53737;68620	8.59E-01;4.40E-01;3.88E-01;2.10E-01
MPC1	-1.55069	0.700467	4	AGCAATGGGAAGACCCCAGT;TGTCAAAGAATAGCAACAGA;GCGGCGCTCGTCACCTCATG;AGTCTCCAGAGATTATCAGT	-3.04;-1.97;-0.73;-0.47	25463;45265;63572;66525	4.00E-01;4.51E-01;4.02E-01;2.64E-01	10917;13870;32177;51979	4.47E-01;8.87E-01;7.75E-01;6.93E-01
TSPAN10	-1.79367	0.672619	4	TGTTCCAGCGTCAAGGATGG;CCTGGAGCACACCCTGCGTG;ACCAAGCACCAGGCCTTGAG;GAGAACACCTGCCTGTTACG	-2.59;-2.19;-1.3;-1.09	34710;41644;55632;58683	5.21E-01;4.31E-01;3.79E-01;4.82E-01	18759;21810;35798;42732	3.75E-01;6.10E-01;6.73E-01;1.03E+00
TSPAN11	-1.52265	0.710253	5	CACGCAGATCACCGCCTCAG;GTAGCCACTCTTCTCCACCA;GCCCGCAAAGATGAGGATGT;CAAGGCAGGCAGATCACCTG;TACCCTCTGGTAATACACAT	-3.91;-2.77;-1.02;-0.53;0.61	8500;31316;59745;65843;73608	4.63E-01;4.61E-01;6.20E-01;4.07E-01;1.10E-01	3834;11599;17697;46108;68929	6.95E-01;8.61E-01;1.15E+00;5.95E-01;2.53E-01
TSPAN12	-2.58363	0.571127	4	AGAAACTGCCAACACACTGA;CAGCAAACAGCAATCATGAC;GTGGGGATGTTAGGATATTG;ATGGATTACCTAGATATCGG	-3.73;-3.59;-2.58;-0.43	11184;13768;34883;66911	4.42E-01;8.92E-01;6.97E-01;2.54E-01	10531;42557;63661;66268	4.55E-01;4.35E-01;4.03E-01;2.71E-01
LOC107984530	-0.533336	0.82455	1	CAAGGCAGGCAGATCACCTG	-0.53	65843	0.0705	11599	0.825
TSPAN14	-1.69054	0.650468	5	GCGTGGTGATGTTCACCCTG;GATGCATGGAATCGACCCTG;AACGTCTACTTCAATTGCAG;GCCGAGGCGGGCAGATCACG;CAGATCGATATCGTCCCGGT	-3.14;-3.01;-2.0;-1.91;1.61	23163;26073;44803;46089;75428	4.43E-01;4.80E-01;4.63E-01;5.95E-01;5.72E-02	2014;31359;32639;51389;54284	9.32E-01;4.62E-01;6.01E-01;4.87E-01;7.72E-01
LOC107984536	-0.466652	1.14447	2	CAAGGCAGGCAGATCACCTG;TCCTGCCTCAGCCTCCCGAG	-0.53;-0.4	65843;67218	5.94E-01;1.23E-01	10224;11599	6.40E-01;1.65E+00
TSPAN16	-2.5696	0.813468	6	CAGACGACTATTCTACACAG;AAAGAAAAGAAGGACCACTG;GGTATGCGGAGGACAGCCCG;GCCGAGGCGGGCAGATCACG;TTTAGTCGCTCCATACCACC;GAGAATCGCTTGAATCCGGG	-4.42;-4.32;-3.7;-1.91;-1.51;0.44	2871;3725;11684;46089;52361;73043	7.35E-01;1.55E+00;1.38E+00;5.11E-01;5.61E-01;1.52E-01	4399;25081;31359;65754;73718;74571	5.94E-01;4.83E-01;5.53E-01;7.51E-01;6.47E-01;9.84E-02
TSPAN17	-2.11072	0.46055	4	GGTAGTTGGAGGCGTCATGT;TATTGAGGTTCCAGTCATTG;TCAGCGCTGACAGATCTGGG;CCGAGGAACACGGAGAACTG	-3.55;-3.1;-1.99;0.19	14424;23991;44960;71991	3.96E-01;5.62E-01;4.84E-01;1.27E-01	5451;32480;53464;63018	6.46E-01;4.49E-01;3.90E-01;3.58E-01
SPRY4-AS1	-1.15607	0.886131	3	GGAATCTCACTCTGTCACCC;TCGCCCAAGCTAGAGTGCAG;CAAGGCAGGCAGATCACCTG	-1.53;-1.41;-0.53	52067;53961;65843	6.64E-01;3.55E-01;2.11E-01	11599;23475;25378	4.88E-01;7.16E-01;1.45E+00
LOC101929106	-2.01752	0.530424	4	GTCTCGTCAGTAGTGAGGGA;AGAACACGGAGAGTGAGGGT;CACCTGGCAGTCGCCCTACG;AAAGCGTGACCACAGATGAG	-3.18;-2.66;-2.3;0.06	22320;33503;39919;71243	3.81E-01;4.42E-01;5.76E-01;1.45E-01	6199;37537;43920;55105	6.03E-01;4.27E-01;5.01E-01;5.91E-01
EAF1	-1.44612	0.718539	4	ACCGCGAGGAACATTGCCTG;CTGACTTACAACGAATAGTG;CTTATTATTAATCATGACAC;GGAGCTCTGAATGGCATAGG	-3.15;-1.55;-1.45;0.37	22815;51733;53341;72760	3.83E-01;5.30E-01;3.91E-01;1.08E-01	4682;24093;25709;54607	6.98E-01;5.60E-01;1.01E+00;6.07E-01
EAF2	-3.10095	0.895041	4	CCTTTGAAAACAGTTACTGG;ACCATGATACTGGAGAATGT;CTCACTCACAGCGCACAGTG;CGAGCGGGTTCTCAAGTTAG	-4.56;-3.37;-3.29;-1.18	1868;18077;19950;57343	1.05E+00;7.16E-01;1.29E+00;5.22E-01	20099;57513;59370;75574	3.75E-01;6.59E-01;3.76E-01;4.24E-02
FOXF1	-3.03761	0.816475	4	AGTGGCCGTTCATCATGCCC;AAGGCCAAGAAGACCAACGC;CATTTCCTTCGGAAGCCGCG;GGCGGCCACTCGTACATGGG	-4.56;-2.87;-2.57;-2.16	1895;29242;35232;42141	1.04E+00;4.80E-01;6.88E-01;1.06E+00	35294;42204;48200;75544	5.32E-01;4.33E-01;4.39E-01;4.31E-02
FOXF2	-1.96561	0.631455	4	TGCTTCATCAAGCTGCCTAA;AGCCCGCGGGCATCATGTCG;CCGCACATGTCGCCCAACCC;CCAAGCCGCTCACCACGCGG	-3.0;-1.73;-1.63;-1.5	26397;48840;50452;52521	4.08E-01;4.87E-01;4.14E-01;6.75E-01	24921;26990;28602;51045	3.96E-01;5.10E-01;8.96E-01;7.24E-01
RBPJL	-2.15078	0.491705	4	CGAACGTAGCCCTCTCGCGG;CTCCACACGCTACCTCTCTG;GCGGATCCTGCATGCCAAGG;GAATGCACACTTGTGCAGCT	-3.07;-2.84;-1.86;-0.83	24648;29691;46996;62279	3.94E-01;4.75E-01;4.54E-01;3.79E-01	15163;30447;47725;52791	3.90E-01;4.67E-01;4.45E-01;6.66E-01
TMUB1	-3.24672	0.97338	4	GAATTTCAGCCGTAGCACGA;AGGTGCGACTCATCTACCAA;GGTCTCAACGCACACCGCTG;AAGGAGCCAATGGTGTCGTG	-4.14;-4.04;-2.44;-2.37	5551;6744;37459;38776	6.39E-01;1.42E+00;6.31E-01;1.20E+00	38681;39983;70698;71895	6.01E-01;4.27E-01;5.77E-01;1.29E-01
TMUB2	-3.22954	1.01596	4	ATTTGAGCCGCACAGTGATG;CAGATGAAACTGATCTACCA;GCTAGGCCAGAGGATACCGT;TGAACTCCCCCATCCATCAG	-4.33;-4.06;-3.26;-1.28	3637;6527;20506;55931	7.89E-01;1.45E+00;1.26E+00;5.65E-01	21511;56951;70918;73806	3.78E-01;6.44E-01;5.87E-01;8.35E-02
SCGB1C1	-1.88541	0.615728	7	CAATGTCAACGAAGATGCCA;TTCCTGCAAACACTACTGGT;TGATGCAGGGATGGCCACAG;CCCCAGAGGAGCTCTATGAG;GGCAGATGCAGAACAGGGTG;GAGCTCTATGAGGGGACCTT;CTCACGGCAGATGCAGAACA	-4.54;-4.03;-2.04;-1.8;-1.58;-0.49;1.28	2028;6885;44072;47857;51329;66302;75038	8.06E-01;9.82E-01;6.53E-01;5.46E-01;5.15E-01;4.02E-01;9.58E-02	2404;11140;26113;29585;33370;70548;75415	7.45E-01;6.99E-01;5.87E-01;7.55E-01;9.96E-01;4.48E-01;8.06E-02
SCGB1C2	-2.16737	0.728972	7	CAATGTCAACGAAGATGCCA;TTCCTGCAAACACTACTGGT;CTCATCGTTGTCCTCCCCCG;CCCCAGAGGAGCTCTATGAG;GGCAGATGCAGAACAGGGTG;GAGCTCTATGAGGGGACCTT;CTCACGGCAGATGCAGAACA	-4.54;-4.03;-4.02;-1.8;-1.58;-0.49;1.28	2028;6885;6974;47857;51329;66302;75038	8.06E-01;9.82E-01;1.76E+00;5.46E-01;5.15E-01;4.02E-01;9.58E-02	2404;11140;26113;29585;70467;70548;75415	7.45E-01;6.99E-01;5.87E-01;7.55E-01;9.74E-01;4.48E-01;8.06E-02
KIAA1644	-1.59605	0.681739	4	TCATTGCCGAGTAATACAAA;GAACCATACACAGACCACAA;GATCCACACTCCCAACAAGG;CTGTTGTCACCATAACAACA	-3.29;-2.89;-0.32;0.12	19829;28597;67930;71632	3.75E-01;4.87E-01;4.79E-01;1.35E-01	5810;9512;48837;57594	6.24E-01;1.16E+00;4.31E-01;5.14E-01
SYNCRIP	-1.61743	0.685208	4	GATGACAAGAAAAAAAACAG;TATTCCTAAGAGTAAAACCA;TGAGAAAGCTGGACCTATAT;TGAGCGAGATGGTGCTGTCA	-2.58;-2.5;-1.36;-0.03	34937;36457;54691;70253	5.25E-01;4.29E-01;3.83E-01;1.69E-01	7189;22751;40985;42519	5.57E-01;5.88E-01;5.54E-01;1.04E+00
TBC1D7-LOC100130357	-1.71356	0.794578	9	CAGACAAAGTTGTGCATGAG;CTTACGATACATCATCACCT;AGTTCTGGAATTCTGGCTCA;GCCGAGGCGGGCAGATCACG;GCACCTTCCATACCAATGCA;CAAAAGTGACCACTAACCAG;AAAAAAGCCCTCACCAACTG;GAGAGTTACTTGCACCCAAG;TCTCCCGCTTCTCCACTCCG	-3.92;-3.55;-2.22;-1.91;-1.42;-1.23;-0.98;-0.18;0.0	8247;14412;41164;46089;53715;56712;60328;69163;70758	4.10E-01;5.30E-01;8.75E-01;7.65E-01;7.49E-01;6.05E-01;5.14E-01;4.10E-01;3.53E-01	6814;8279;17114;20730;23727;31359;36278;63032;69185	4.21E-01;7.29E-01;6.93E-01;8.66E-01;1.10E+00;1.11E+00;1.30E+00;4.91E-01;4.41E-01
MMAA	-2.91681	0.70778	4	AAACCACTAGCATTTCGAGT;GCAGCATCCACTTTGTACAA;GAAGCTATTCTGTTGTGTGA;GAAAGATGAAGTGGTAACAT	-3.78;-2.94;-2.86;-2.08	10389;27573;29399;43429	4.58E-01;5.01E-01;8.67E-01;1.00E+00	33999;48068;49889;67064	5.09E-01;4.78E-01;4.20E-01;2.50E-01
PRR23D1	-1.77583	0.762162	8	TTGGAGTTCCATGCTCAAGA;GACTGGTATGAATTCAGGTG;CAGCTGCAGCACTGTCTCTG;TTTGGGTGGATTCATTTGTG;CATGCTCAGGGACAATCACA;GAACCGCAGAATGACAATGA;AAGCTGAAGTCATCAACGGA;CTGACCTCAGGACATGCTCA	-3.88;-2.97;-2.19;-1.59;-1.36;-1.15;-0.58;-0.48	8859;26954;41608;51153;54694;57884;65301;66397	4.08E-01;5.84E-01;7.35E-01;7.52E-01;6.03E-01;5.07E-01;4.20E-01;5.35E-01	11045;12141;19558;22748;26289;35834;50505;68575	4.10E-01;6.07E-01;6.77E-01;8.87E-01;1.14E+00;1.10E+00;8.55E-01;4.22E-01
TYR	-2.78787	0.768523	4	ATATTGATGTCGTTAAACAT;TGCACAGATGAGTACATGGG;ATGACAAATCCAGAACCCCA;TGGTATGCTTTGCTAAAGTG	-4.82;-2.93;-2.8;-0.6	709;27939;30555;65074	1.45E+00;4.96E-01;8.28E-01;3.02E-01	12368;46887;49503;76733	4.21E-01;4.65E-01;4.24E-01;1.60E-02
LOC102723840	-1.52854	0.484514	1	GGAATCTCACTCTGTCACCC	-1.53	52067	0.172	25378	0.485
ALG8	-2.34184	0.523745	4	TCGGTGTACTTCAAAATCTG;TACCTGAAATAATCGTGCAA;AAGAGTCGGGAAAAGACTTG;TGTTTCACTGCAAATAAACC	-3.54;-3.28;-2.95;0.4	14642;20134;27382;72890	3.94E-01;6.53E-01;9.42E-01;1.05E-01	4552;50080;57322;62795	7.08E-01;5.04E-01;3.75E-01;3.64E-01
PDXK	-2.88976	0.792807	5	CTGTCTTCCAGGTTACTGAG;TCCCCCTAAAGGTTATACGA;TTTCTTTGTAGACGGGAAGG;GAGCTCCAGGAGTTGTACGA;CAAGGCAGGCAGATCACCTG	-4.17;-3.96;-3.07;-2.72;-0.53	5091;7715;24823;32349;65843	6.01E-01;1.14E+00;8.18E-01;1.05E+00;3.52E-01	11599;45116;52597;69716;72357	4.07E-01;6.08E-01;4.92E-01;4.85E-01;1.47E-01
ALG2	-2.15302	0.424819	4	CAGGAAAACCATGCGCACGT;GGAGAGGGTTCATCTGATCG;CACAGCGCACCGGTAGCTCG;TCTCCATCAACAGATACGAA	-3.78;-2.93;-1.89;-0.02	10505;27756;46519;70378	4.55E-01;4.99E-01;4.61E-01;1.66E-01	7058;30923;49698;66946	5.63E-01;4.62E-01;4.22E-01;2.53E-01
ALG3	-2.67647	0.597224	4	TATGACTATACCCAACTGCA;CACCCTGTGAATGACCCAGA;GCGGCTCTTCAATGACCCAG;CACACAGTTTGGCTTCCGTG	-3.46;-3.04;-2.87;-1.34	16280;25333;29203;54968	3.83E-01;5.37E-01;8.74E-01;5.95E-01	22474;48214;52114;61177	3.82E-01;4.80E-01;3.99E-01;4.10E-01
ALG1	-3.31166	1.17691	4	AGAACCTGAGGACCCAGTCA;AGCAATGCTAGGCAGACCTG;GCATAGCATTGGTAACACAC;ACTCCGTACTGGAAAACTCG	-4.7;-3.83;-3.66;-1.06	1171;9652;12425;59246	1.24E+00;1.15E+00;1.86E+00;4.65E-01	18196;65012;67793;76271	3.76E-01;9.63E-01;4.76E-01;2.64E-02
ALG6	-2.51403	0.533182	4	TCATAATCACCAAACATAGG;CAAATAATCCACGATCAACC;ATTATTAATTGGATGTGACG;AAAATGCCAGTGACCCTAGG	-3.41;-2.69;-2.62;-1.33	17171;32777;34167;55123	3.79E-01;4.47E-01;7.17E-01;5.91E-01	22319;43256;44680;60287	3.81E-01;4.38E-01;4.88E-01;4.35E-01
ALG5	-2.45011	0.653302	6	CAAAGTACGTGTGATAACCC;GTAGGTGAGTCCCATATGCT;ATCACTTCATAAGTGAACGC;AGCAGTTGTAAATGCAACGA;GGAATCTCACTCTGTCACCC;GAGAATCGCTTGAATCCGGG	-4.35;-4.16;-3.11;-2.0;-1.53;0.44	3424;5221;23887;44810;52067;73043	6.74E-01;1.29E+00;7.12E-01;5.25E-01;5.68E-01;1.52E-01	4399;25378;32632;53573;72227;74018	5.94E-01;4.83E-01;5.38E-01;4.86E-01;5.45E-01;1.18E-01
LOC107985664	-1.22897	0.8557	4	TACAATTTAGTCAGCAAACG;GTTGGCTATTAGTGTCACTG;GGCATCAACGACTAGCATGG;ACGAGCAGTCCAGACGTTTG	-3.08;-1.36;-0.51;0.04	24444;54590;66098;71115	3.93E-01;5.86E-01;4.39E-01;1.48E-01	6327;11344;22852;53017	5.97E-01;1.03E+00;1.14E+00;6.58E-01
WIF1	-0.26482	1.50968	4	CCAGGCGGGTGCCGAAATGG;TGCCTCACAAGGCATCAGGT;GAGCATCGATCCATAGGTAC;AGTCCACCATTCATACATCG	-1.07;-1.02;-0.33;1.37	58982;59688;67817;75170	1.38E+00;7.27E-01;4.76E-01;5.17E-02	2272;9625;17754;18460	9.69E-01;1.15E+00;1.43E+00;2.49E+00
LOC107985663	-0.399969	0.87935	1	TCCTGCCTCAGCCTCCCGAG	-0.4	67218	0.0615	10224	0.879
PDXP	-1.65179	0.753447	4	GGTCCTGTTCGACTGTGACG;CTCGTCGTAGCCCACAAGCA;CACGGTCGGTGGCCACGAGT;GCAACAACAGCCGGCGCGCG	-2.67;-1.49;-1.29;-1.16	33304;52700;55660;57672	4.97E-01;5.47E-01;3.79E-01;5.12E-01	19770;21782;24742;44138	3.75E-01;6.10E-01;1.05E+00;9.77E-01
RNGTT	-1.62739	0.835193	6	AGACCACCAGGAATCTACAA;CAGAAGTGTCATCAATTCTG;TTATCAAATACTCTCTTGGA;GGAATCTCACTCTGTCACCC;TCGCCCAAGCTAGAGTGCAG;GAAAGAAGGAATCAGAACCC	-2.68;-2.32;-1.97;-1.53;-1.41;0.14	33123;39536;45177;52067;53961;71714	8.03E-01;6.49E-01;5.42E-01;4.83E-01;5.25E-01;2.00E-01	5728;23475;25378;32265;37906;44300	5.20E-01;4.88E-01;6.70E-01;8.13E-01;1.07E+00;1.46E+00
RPL32P31	-2.29222	0.351885	2	CATATCGGTCTGACTGGTGC;GGAATCTCACTCTGTCACCC	-3.06;-1.53	25038;52067	3.59E-01;3.45E-01	25378;52379	3.56E-01;3.40E-01
KIAA1683	-2.17235	0.437241	4	ATTGTCCAGAAGGTATGACC;CATCCATGAGAACCCACCCA;ACAGGCACATACACGTGAGG;CTGACCAAGACGCAGTCCCG	-3.6;-3.25;-1.32;-0.52	13607;20665;55291;65953	4.05E-01;6.39E-01;3.80E-01;2.79E-01	11489;22151;56758;63846	4.36E-01;6.02E-01;3.76E-01;3.35E-01
KIAA1324L	-2.20276	0.578816	4	GCTGGAGATCATATCCAGAG;TATCAGTTTATGTGGGCATG;GGCACATTCAGCAACAAACC;TAGACGGTTCATCAATGACA	-2.88;-2.36;-1.86;-1.72	28988;38900;46984;49101	4.36E-01;4.26E-01;4.54E-01;7.92E-01	28341;30458;38542;48454	4.28E-01;4.66E-01;6.06E-01;8.15E-01
INSL5	-0.93176	0.87411	4	GGGATCCCTCAAGCTCAGCA;TCCAGCGCAAAACCTTCCGA;CAGAAAACTCACGTTTATGT;AGGAGTCTGTGAGACTCTGT	-2.57;-2.47;-1.16;2.48	35217;36908;57609;76212	5.30E-01;4.28E-01;3.75E-01;2.78E-02	1230;19833;40548;42225	1.22E+00;6.62E-01;5.63E-01;1.05E+00
INSL4	-2.87893	0.737872	4	TGAATGTCTTCTCAGGCATG;AACAAAGATGGACAAGCCTT;CTGGAATCTGGACGTCCCAA;AGATTGCTGGCAGATAGGAC	-3.89;-3.86;-2.84;-0.92	8734;9151;29842;61089	5.02E-01;1.19E+00;8.52E-01;4.12E-01	16353;47615;68293;68713	3.82E-01;4.73E-01;4.89E-01;2.08E-01
INSL6	-2.3752	0.62053	8	CTGCCACTGCAATACCAACG;AATTCTCTTGTCTTACCAAG;AGAAAACGATCAAACCCCAC;GAGCCAGTTCCGTTTCGAGG;GTAGGCTTCGACCTTCTCCG;CACGAGAAAACCGAACCAGC;TCTTCAGGAGAGAATACCAT;AATGAAGAGTACAACCTCAG	-3.69;-3.16;-3.16;-3.1;-2.83;-2.23;-1.01;0.18	11871;22622;22656;24057;30023;41091;59901;71939	4.17E-01;5.22E-01;6.05E-01;8.32E-01;9.48E-01;8.61E-01;5.23E-01;2.56E-01	5503;17541;36354;47438;53401;54786;54820;65571	4.69E-01;5.12E-01;6.13E-01;6.53E-01;5.83E-01;5.22E-01;6.82E-01;5.78E-01
GALR1	-2.33866	0.53833	4	GACGAAGGTGCACACCACGT;CGTGGAGAACTTCGTCACGC;GGTGGGCAGCGCGTACACGG;GGAGCGCCGCGAGTGCACGA	-2.93;-2.49;-2.46;-1.48	27886;36618;37265;52814	4.23E-01;4.29E-01;6.36E-01;6.65E-01	24628;40199;40836;49577	3.94E-01;4.27E-01;5.57E-01;7.75E-01
INSL3	-1.90491	0.561975	4	CTAGCGCGCGTACGAAGTGG;GGCCGACAGTAATCTCACGC;GCCAGGAGGCCTGCGACCGG;CAACTTCTCACGCATCTCTG	-3.18;-2.75;-0.9;-0.79	22296;31621;61461;62790	3.81E-01;4.56E-01;3.84E-01;3.64E-01	14652;15981;45801;55162	3.94E-01;7.93E-01;4.71E-01;5.89E-01
RPS15AP39	-1.53385	0.483113	1	CTCACTGTGATGATGAAGCA	-1.53	51978	0.173	25460	0.483
RPS15AP33	-1.53385	0.483113	1	CTCACTGTGATGATGAAGCA	-1.53	51978	0.173	25460	0.483
RTN1	0.195225	1.44082	4	ACAGCACACTTAAGGAACTG;GTAAAACAGACTTGTAGATG;GTTCAGCGTGGTGAGCGTCG;GCAGTGCAGAAAACCGACGA	-3.37;-0.4;-0.25;4.81	18067;67221;68549;77245	3.76E-01;1.10E+00;4.97E-01;4.40E-03	197;8893;10221;59360	2.00E+00;1.21E+00;2.10E+00;4.62E-01
RDM1	-2.29342	0.442628	4	ACATGCAAAGCCTCGGCCGT;TTAATGACGGCATAGAAACC;GAGCCCAAAAGGCATGCGAC;GTGTTCCAAAAGGATCATCA	-3.85;-3.08;-1.54;-0.7	9391;24463;51848;63900	4.83E-01;5.53E-01;4.01E-01;3.34E-01	13542;25594;52983;68066	4.06E-01;5.32E-01;3.93E-01;2.24E-01
CLUL1	-1.23854	0.885547	5	TGCACAATTGACCCAAATGG;TCTTTGAAATCAGGCCTCCG;GGAATCTCACTCTGTCACCC;GAGGTGAAGAAGGCTTTGAC;TCACTGCGCACCCACTTGGA	-2.76;-2.17;-1.53;-0.64;0.91	31484;42000;52067;64604;74376	5.98E-01;5.50E-01;4.86E-01;3.96E-01;8.77E-02	3066;12838;25378;35442;45938	7.74E-01;7.97E-01;7.98E-01;9.25E-01;1.13E+00
LOC105373909	-0.533336	0.82455	1	CAAGGCAGGCAGATCACCTG	-0.53	65843	0.0705	11599	0.825
LOC101930090	-1.87243	0.511616	3	TCACAATCTGAGTGACTGGG;GTGCCGCACCACCGTCCACG;GAGAATCGCTTGAATCCGGG	-3.39;-2.68;0.44	17731;33153;73043	3.89E-01;5.02E-01;7.62E-02	4399;44306;59700	8.19E-01;3.77E-01;3.39E-01
LOC105373900	-2.8549	0.573338	2	CCAAGAGAAAATGCAATGTG;TCAAGAGATAGCAACTGTGG	-2.9;-2.81	28555;30315	3.32E-01;8.15E-01	47127;48868	3.22E-01;4.00E-01
LOC105373902	-2.03224	0.36782	1	ACCTTGGACATAAAAGCTCT	-2.03	44241	0.243	33201	0.368
LOC105373903	-1.22372	0.689604	2	GCCGAGGCGGGCAGATCACG;CAAGGCAGGCAGATCACCTG	-1.91;-0.53	46089;65843	3.17E-01;1.41E-01	11599;31359	5.94E-01;7.85E-01
LOC101927414	-1.91411	0.392609	1	GCCGAGGCGGGCAGATCACG	-1.91	46089	0.225	31359	0.393
INMT	-3.54634	1.19981	4	ACAGGCGAATTTCACCGCTG;TAAGTAGCCAAGTAGTCCCT;CCGGTTGCGGTCGGTAAAGT;GGGGACACGCTGATTGACAT	-4.45;-3.9;-3.3;-2.54	2603;8578;19724;35794	9.16E-01;1.24E+00;1.31E+00;1.34E+00	41648;57704;68862;74839	6.73E-01;6.65E-01;5.06E-01;5.94E-02
LOC101927418	-2.44886	0.513306	4	ACATGGAAACTTGATAAGAC;AATGAAGAGAGAGTTCCCTA;ATAGTAAAAACACCCCCCCA;TCGAGTTGGGCATCGCCAGT	-3.28;-2.74;-2.43;-1.35	20068;31876;37740;54828	3.75E-01;4.54E-01;6.25E-01;6.00E-01	22614;39717;45580;57389	3.82E-01;4.27E-01;4.74E-01;5.21E-01
TMEM246-AS1	-1.83916	0.706332	4	CCACGTTGCACAGGAAGAGT;AAGCTCCTCAAAATAGTGGA;TCTCAAACGAGTTGGTCGAA;TCAAGCTGTATCACCCCGAG	-4.93;-2.54;0.0;0.11	411;35769;70710;71567	1.68E+00;4.31E-01;5.77E-01;1.37E-01	5875;6960;41673;77031	6.21E-01;1.40E+00;5.41E-01;9.22E-03
LOC105375431	-2.48467	0.516561	4	AAACCGTGAATGTTGATGTG;GGGGAGTGTAGTCACCAACG;GAGTGATTGAAGAACTGACG;TCCTGGTACAAACTCCACGA	-3.96;-3.09;-2.74;-0.15	7704;24267;31925;69419	5.37E-01;5.56E-01;7.83E-01;1.90E-01	8023;45539;53179;69742	5.25E-01;4.53E-01;3.92E-01;1.82E-01
FECH	-1.66965	0.678273	4	TACAGATACTATAATCAAGT;AAGATATGGACTTCCAAGCA;TCTGAATAGGAAGTGTCATG;TCCACTTGAGAAGAGAAGCG	-3.53;-1.23;-1.06;-0.86	14862;56603;59180;61968	3.92E-01;6.34E-01;3.76E-01;3.87E-01	15474;18262;20839;62561	3.88E-01;7.10E-01;1.24E+00;3.71E-01
ADAP1	-1.56848	0.793186	5	CAGGTGCTCGATCTTCATCA;GTTTGTGCTGACAGAACGAG;GTGGGCCGGTAGTAGAAGGA;GCTTCCAGAGAAAACCCTCA;TCCTGCCTCAGCCTCCCGAG	-2.6;-2.5;-1.43;-0.92;-0.4	34598;36504;53626;61166;67218	6.79E-01;4.84E-01;5.03E-01;3.88E-01;3.07E-01	10224;16276;23816;40921;42828	4.26E-01;6.62E-01;8.56E-01;7.36E-01;1.29E+00
ADAP2	-3.10517	1.05807	5	CTGGGACGACAGTATTGTGG;CCTCCTGAAGTACTTCACAA;TGATGTCAGGGAAGTTACGG;TGTTTGTGTATCATGAAAGT;TCCTGCCTCAGCCTCCCGAG	-4.32;-4.08;-3.64;-3.09;-0.4	3693;6211;12838;24334;67218	7.07E-01;1.30E+00;1.50E+00;1.48E+00;3.07E-01	10224;53086;64612;71240;73754	4.26E-01;8.35E-01;7.98E-01;5.43E-01;1.06E-01
KLHL10	-0.981251	1.11869	6	TCATTGAGTATGCATACACC;TTGGTGAAATCAGAATTAGA;GCAACGTCTGGAGTGCATCG;GTGGGCGCCCTCCGCAAGGG;CAAGGCAGGCAGATCACCTG;TTCAACGAGCTTAGACTAGA	-2.8;-2.15;-1.33;-0.6;-0.53;1.53	30524;42332;55108;65151;65843;75339	7.14E-01;7.23E-01;7.62E-01;7.23E-01;3.99E-01;7.17E-02	2103;11599;12291;22334;35108;46921	8.48E-01;7.55E-01;1.32E+00;1.28E+00;1.20E+00;1.31E+00
KLHL11	-0.458331	1.45812	4	TGATCCAGCAACATACACGT;TGGCGGCAGCCAGTACCGAG;GGGGCCCGAACCCGACACAG;CTCGACATGTCAAACCAGAG	-1.62;-0.76;0.22;0.33	50611;63171;72137;72641	9.64E-01;8.68E-01;6.55E-01;1.11E-01	4801;5305;14271;26831	6.89E-01;1.61E+00;1.69E+00;1.84E+00
KLHL12	-1.41509	0.853639	5	CCCTGCATTGTAAACTACAG;AGAAACAGTACATGTGACAG;AGTGCGACGAAATTCAGGTA;GACATTCCACTGAACTAAGG;TCCTGCCTCAGCCTCCCGAG	-2.97;-2.03;-1.25;-0.43;-0.4	26911;44344;56323;66942;67218	5.02E-01;5.92E-01;5.43E-01;4.22E-01;3.07E-01	10224;10500;21119;33098;50531	4.26E-01;9.25E-01;9.69E-01;1.02E+00;9.27E-01
KLHL13	-1.83457	0.628222	5	ACCACTCACTTGGTTACACT;CATTAATTACGTGCAAACGG;CCATCATGACTCTATGCACA;TAAAGTGTTTCTCATATCTG;TCCTGCCTCAGCCTCCCGAG	-4.7;-2.13;-1.45;-0.48;-0.4	1148;42650;53240;66386;67218	1.16E+00;5.61E-01;4.98E-01;4.14E-01;3.07E-01	10224;11056;24202;34792;76294	4.26E-01;8.91E-01;8.41E-01;9.50E-01;3.24E-02
KLHL14	-0.127432	1.17412	4	CCAGCAGTTCCATTGCCACA;GCACCGAGATCTGGTCGTTG;GGTGCTCGAGTACCTCTACA;AATACTGAACCAAATTGCTG	-2.68;-1.67;-0.59;4.44	33069;49812;65168;77149	4.93E-01;5.00E-01;4.23E-01;6.56E-03	293;12274;27630;44373	1.82E+00;9.72E-01;9.32E-01;9.67E-01
KLHL15	-2.46953	0.5333	5	CCCAGAGATAGAGCTGTACG;AGCCTGAAGAATCTCATGAA;GATTTCGGCGTAAACATCGA;CCTACAGCAAATTCAGAGCG;CAAGGCAGGCAGATCACCTG	-3.76;-3.56;-2.74;-1.75;-0.53	10801;14189;31780;48582;65843	4.17E-01;7.38E-01;6.19E-01;5.40E-01;3.52E-01	11599;28860;45664;63236;66632	4.07E-01;4.65E-01;4.62E-01;3.90E-01;3.26E-01
KLHL17	-1.7274	0.58199	4	ACGACCCCGTGACTAACACG;GGAGATCCGTGCGCACAAAG;CACCACAATCTCAGCCGTGT;GAGCTGGGTGAAACACGACG	-3.23;-2.7;-1.36;0.38	21113;32562;54701;72824	3.77E-01;4.48E-01;3.83E-01;1.07E-01	4618;22741;44894;56343	7.03E-01;5.88E-01;4.85E-01;5.53E-01
KLHL18	-2.60229	0.664197	4	TAATGCAAGGAATGGACCCA;TCACCACAGCCACGCCAACG;GCTGTGCGACGTGACCCTCA;TGGACTTATCTACGCTGTAG	-4.58;-3.43;-2.6;0.2	1796;16749;34608;72039	1.06E+00;7.63E-01;7.05E-01;1.26E-01	5403;42854;60688;75646	6.48E-01;4.36E-01;3.80E-01;4.07E-02
DMRTB1	-1.89106	0.579929	4	GCGGCCTCCGCCCCAAAAGG;GTGCCCGTCAAGGGACACGC;TTACCAAAGTCGGTGAACAG;GTCTCCGGAGGGAGTCCCCG	-3.03;-2.16;-1.46;-0.91	25538;42154;53126;61297	4.01E-01;4.33E-01;3.92E-01;4.06E-01	16145;24316;35300;51904	3.83E-01;5.55E-01;6.86E-01;6.95E-01
C7orf61	-2.30747	0.59041	4	TCAGGGTGTCCTGAGATGGT;CGTGTTGGCCAAGACTACAG;GTTCTTCCGATGGGTTAGAC;TCGGGGGACTCACCCAACTT	-3.93;-3.8;-0.8;-0.69	8157;10047;62692;63991	5.20E-01;1.12E+00;3.93E-01;3.31E-01	13451;14750;67383;69283	4.07E-01;8.46E-01;4.66E-01;1.93E-01
LOC107986927	-0.576801	0.807192	1	CGTCGCTGGTGGAAGCACGG	-0.58	65370	0.0736	12072	0.807
LOC107986925	1.78445	1.62676	1	GGAAGCCACTGTGTGCCGGT	1.78	75613	0.0104	1829	1.63
PAQR9	0.0350489	1.95883	4	CCCGACGCGTAGCACCACAA;GAACGGGTAGGTACACCAGT;TACGCGTCCATCAGCTACTA;CGAGGTGCCCGACGACTTCG	-0.55;-0.31;0.07;0.92	65695;68054;71336;74400	1.93E+00;1.17E+00;6.08E-01;6.96E-02	3042;6106;9388;11747	8.56E-01;1.50E+00;2.20E+00;3.28E+00
IGIP	-2.00722	0.541223	4	CATGAAGAAACGCAGTGTGT;AGTGCTGGGAAATCACCATG;GGAGAACATGACAGCAAATA;TGTTCTCCCATCTCAGTGCT	-3.22;-3.21;-0.83;-0.77	21453;21556;62258;63098	3.78E-01;6.16E-01;3.90E-01;3.56E-01	14344;15184;55905;56008	3.97E-01;8.27E-01;3.78E-01;5.63E-01
SLU7	-1.75314	0.734084	4	AATTTGGCTCCAACTCGCCT;TTTGAAGGATCAATATACCA;GAAAGCCCAGAAACTCCAAG;TCTGGAGAATGGTACAAGAG	-2.27;-1.96;-1.67;-1.12	40391;45365;49948;58317	6.41E-01;4.52E-01;4.19E-01;4.93E-01	19125;27494;32077;37051	3.75E-01;5.02E-01;7.79E-01;1.28E+00
IER2	-1.82972	0.596835	4	ACAGCGCATCATGACCCTGT;TATCACTCCCGCATGCAGCG;GCACCCGTTTCCGGAGCCAA;GCCCCGAGAAGCCGAGTCCA	-3.0;-2.38;-1.14;-0.8	26327;38596;57987;62687	4.08E-01;4.26E-01;3.75E-01;3.67E-01	14755;19455;38846;51115	3.93E-01;6.73E-01;5.99E-01;7.22E-01
THAP12P7	-3.34317	0.766391	2	TGAATCTCATAACCTAAGAG;CAGAACCCCAGCGAAGAAGA	-3.63;-3.05	12924;25148	5.56E-01;9.77E-01	52272;64533	3.58E-01;1.58E-01
THAP12P1	-1.55492	0.477604	1	TCAGCCTCATGTCCATCCAG	-1.55	51655	0.176	25785	0.478
LOC100130987	-2.74724	0.85221	8	TGGCAGTACGGGCCCTGCAC;ACACCTCAGAGACCTAGCTC;CCTCCTCTTCACAACCGGGT;CCACACCTCCAAGTCAACAG;GCCAGCTCTCAATCGCACAG;GAAGCCTCAATGACAAACTG;GGCCACGCAAGTAACACAGA;TCCGCTTCCTCCTCGTCGCG	-3.69;-3.41;-3.05;-2.97;-2.61;-2.42;-2.28;-1.54	11970;17155;25294;26844;34310;37828;40173;51941	4.18E-01;5.15E-01;5.68E-01;7.35E-01;7.82E-01;1.00E+00;1.41E+00;1.39E+00	25501;37284;39614;43132;50579;52153;60273;65483	7.94E-01;8.99E-01;6.81E-01;5.86E-01;5.56E-01;5.55E-01;5.13E-01;5.83E-01
LOC105369340	-0.965843	0.787056	3	AACACACCTGGCAGTCGTAG;CACCGTCAAGTATGACCGCA;CTACTTTCAGAGCCCCCCCG	-2.89;-2.71;2.7	28720;32513;76347	3.56E-01;5.13E-01;1.85E-02	1095;44939;48722	1.38E+00;3.73E-01;6.04E-01
RTEL1-TNFRSF6B	-2.67754	0.815854	9	CTTTGACGAAGCTCACAACG;GCAATCACGCCGGCACCAGG;AGGGCCGTGCAGTTGCGGTG;GTTGTCATACACCCTGACGT;GGTGCCGGCTGTACGCGGAG;CCTGCTCATACTCCACACAC;AACTGCGTGTAGTGGCGCGG;GGAATCTCACTCTGTCACCC;GTCACCGGAGGACGGCTCAG	-4.83;-3.5;-3.03;-2.99;-2.91;-2.44;-1.72;-1.53;-1.15	691;15298;25760;26423;28271;37642;49065;52067;57776	1.13E+00;5.21E-01;5.64E-01;6.74E-01;8.77E-01;8.23E-01;7.03E-01;9.10E-01;1.15E+00	19668;25378;28377;39813;49157;51020;51682;62130;76751	6.59E-01;6.20E-01;5.73E-01;6.23E-01;6.36E-01;5.64E-01;6.29E-01;5.15E-01;3.50E-02
SLN	-2.63081	0.591193	4	CTTCACTATTGTCTTGATTA;GAAAATGGGGATAAACACCC;TGATTACGGTTATTCTTATG;GAAGTTGAGAAACAGCTCCC	-4.04;-3.62;-2.26;-0.6	6724;13215;40470;65068	5.78E-01;9.20E-01;5.65E-01;3.02E-01	12374;36972;64238;70707	4.21E-01;4.28E-01;4.10E-01;1.58E-01
SLK	-1.60694	0.83106	5	CACCTGCACAAAATTCAATG;TCAGAGTTGATATTAATACT;GAGTATCAGCTAAAAACACG;GCCGAGGCGGGCAGATCACG;AGGATACGCAGAGTAATGAT	-4.11;-3.9;-3.68;-1.91;5.56	5875;8593;12188;46089;77351	5.58E-01;1.06E+00;1.56E+00;5.95E-01;2.53E-03	91;31359;65262;68836;71567	2.23E+00;4.62E-01;8.30E-01;4.60E-01;1.71E-01
SLA	-1.90329	0.549832	5	ACTGGTACTACATTTCCCCG;TGTGTGGCCAGAGTTTACCA;GCCGAGGCGGGCAGATCACG;AGACGGGTAGTCACTTAGCA;CCCCCCGATATTCCGCCGAG	-3.38;-3.03;-1.91;-1.17;-0.02	17762;25733;46089;57578;70322	3.93E-01;4.83E-01;4.62E-01;4.07E-01;2.09E-01	7120;19866;31359;51687;59673	5.05E-01;5.68E-01;6.29E-01;4.82E-01;5.66E-01
PHYH	-2.12654	0.513434	4	GGATAATAACGTTCTAACCC;TTACAATTACCAGAATCTGG;CAGATACTGCACTCTCCCCG;TCTCATCGTTTGCGCCTGGA	-4.4;-3.27;-0.84;0.0	3059;20293;62150;70553	8.54E-01;6.49E-01;3.89E-01;1.62E-01	6752;15292;57170;74383	5.76E-01;8.22E-01;3.75E-01;7.00E-02
GFY	-1.69508	0.621469	4	TTCAGAAGCACCCTTCAGAG;GGTTAGTGTTTGAGGTCTCG;GGGGCTCAGTGAAGTCAAGT;AAAATGCAACAGATGTACCC	-3.69;-2.54;-0.33;-0.22	11923;35725;67823;68874	4.28E-01;4.31E-01;4.77E-01;2.04E-01	8568;9619;41717;65519	5.07E-01;1.15E+00;5.40E-01;2.90E-01
NOTCH4	-3.08974	0.807448	4	ACACCCCTCCATTAACACAT;TGTGTCAGCCTGGCTATTCG;GGAGGCCTCTGTGTCGACAG;GCTGCCATTGTATAGGCATG	-4.09;-3.05;-3.0;-2.21	6025;25141;26219;41378	6.12E-01;5.40E-01;9.89E-01;1.09E+00	36064;51214;52281;71417	5.46E-01;5.21E-01;3.98E-01;1.41E-01
PHGR1	-1.17804	0.855733	4	CCACAGTGGCAGTGCCCCTG;CACCCCCCCACCATGGTCCA;GATGGCCATGCCCCCCACAG;GGCCATCCTCCAGGTCACTG	-3.54;-3.53;0.07;2.29	14669;14810;71289;76067	3.94E-01;8.43E-01;6.06E-01;3.11E-02	1375;6153;62646;62787	1.17E+00;1.49E+00;3.93E-01;3.64E-01
MEAF6	-1.08813	0.780453	5	ATGTATGGCAATATTATTCG;GCGGCTCTTCAGTAAATCCT;GGAATCTCACTCTGTCACCC;CGCAGATCCCGGACACCCGG;CCAATAGCAAAAATGATCGA	-4.14;-2.07;-1.53;-1.42;3.72	5503;43648;52067;53694;76875	5.77E-01;5.78E-01;4.86E-01;4.51E-01;1.59E-02	567;23748;25378;33794;71932	1.45E+00;5.04E-01;7.98E-01;9.91E-01;1.60E-01
AZIN1	-2.11868	0.461967	5	GGAAAGTAGATATCCAACAG;TGCTCGATGTGTGTTTGACA;ACTTGATGTCCAAATAATTG;AATGGCTTTAGTGCAAGAGT;GAGAATCGCTTGAATCCGGG	-4.15;-2.93;-2.59;-1.37;0.44	5352;27891;34856;54460;73043	5.86E-01;4.69E-01;5.60E-01;4.40E-01;1.27E-01	4399;22982;42586;49573;72091	6.48E-01;5.14E-01;4.73E-01;5.20E-01;1.55E-01
NOTCH1	-2.1821	0.510701	5	TCGCACGCCTCCTCGATCAG;TTGACGTCGATCTCGCATCG;GCCGAGGCGGGCAGATCACG;TCCTGCCAGAACACCCACGG;TGCAGGTCAGTACTGTACCG	-4.56;-3.06;-1.91;-1.28;-0.1	1909;25079;46089;55824;69771	9.53E-01;4.89E-01;4.62E-01;4.24E-01;2.26E-01	7671;21618;31359;52385;75533	4.86E-01;5.35E-01;6.29E-01;4.70E-01;5.42E-02
NOTCH2	-2.61956	0.730376	6	CTGGGGACACACATCGACGA;TTGATGTCCATCTCACAACG;TGGAAGTACCTGTACCACTG;CTGTAAACCCTGAGGCACAT;CATTGGTGGATACAGATGCG;TTGTTGATATAATCCCAGCA	-3.85;-3.29;-3.23;-2.98;-2.79;0.42	9414;19854;21061;26747;30864;72968	4.18E-01;5.21E-01;8.09E-01;1.04E+00;1.44E+00;1.55E-01	4474;46600;50706;56364;57588;68032	5.89E-01;8.64E-01;6.36E-01;5.06E-01;4.56E-01;3.38E-01
AZIN2	-2.30598	0.646509	6	AAATGCGAAGAAGCACCATG;ACTTGACAGCATAAAAGGGC;CTGCTGCTGCTGAGGCTGAG;GTCCAAGGCTGAGTTGATCA;GGGGCGCTACTACGTGACCT;TCGGGAAGTCTTCATATGTG	-4.75;-2.76;-2.0;-1.86;-1.71;-0.75	958;31468;44748;46853;49180;63327	1.16E+00;5.12E-01;5.37E-01;5.04E-01;6.46E-01;5.24E-01	14115;28262;30589;32694;45974;76484	3.98E-01;4.88E-01;5.64E-01;7.98E-01;7.45E-01;3.24E-02
ZNF658	-2.79573	0.728044	5	ATATTGCATTACTAAACCTA;CAGCATCAGAGGCCCCACTC;CAGCATCAGAGAATTCACAC;CACATGAGAACTGACACAAG;GCAGAGATGGAACTCTGTGG	-3.68;-2.96;-2.92;-2.3;-2.12	12038;27170;28089;39822;42913	4.03E-01;4.73E-01;7.13E-01;7.70E-01;1.28E+00	34529;37620;49335;50259;65407	6.77E-01;4.94E-01;4.68E-01;5.07E-01;3.67E-01
ZNF655	-1.81346	0.580745	4	TGAACACTTAAATCTAACAG;GGATTTATCAGACGCTTCAC;CCCAGAGCCTCAGTTTGTGC;TAGGCAAATAACAATCAGCA	-3.22;-2.18;-2.03;0.18	21287;41832;44271;71946	3.78E-01;4.32E-01;4.95E-01;1.28E-01	5496;33171;35623;56135	6.43E-01;4.44E-01;6.77E-01;5.59E-01
TCTEX1D2	-2.2237	0.576522	4	ATTTGACCGATACAAAATGG;CCGAGAACACCTATATTCTG;GATACAGTCTTTAACCACAG;CATCGGAGTGTCCTTCTCGG	-4.48;-3.35;-0.67;-0.4	2396;18542;64343;67238	9.48E-01;7.01E-01;4.11E-01;2.45E-01	10204;13099;58900;75046	4.62E-01;9.26E-01;3.75E-01;5.46E-02
TCTEX1D1	-2.2436	0.458447	4	GATGACTAAAACCATTTCTG;CTCTCGCCTTACAGTTCAGA;TTTGGCGAAAGGAAATTCAT;GAGATATCATCACGCTGACT	-3.21;-2.94;-1.83;-0.99	21473;27537;47434;60201	3.78E-01;5.02E-01;4.48E-01;4.37E-01	17241;30008;49905;55948	3.78E-01;4.71E-01;4.19E-01;5.65E-01
ZNF653	-1.13401	1.05327	4	TACACCCAGACAGAGCCCGA;CCGGCCGCGACTCACGGAGT;CCGTGAGAGCGTCGTAACCA;TCAGGGTCTGAGTCGCTGAG	-1.64;-1.25;-0.98;-0.66	50391;56256;60283;64409	9.55E-01;6.25E-01;3.79E-01;3.20E-01	13033;17159;21186;27051	4.12E-01;7.48E-01;1.23E+00;1.83E+00
ZNF652	-1.53014	0.641491	6	GGCTCATGTGCGGAAACACA;AGAAAGTCAGCGTTACACAA;GCCGAGGCGGGCAGATCACG;GGAATCTCACTCTGTCACCC;CCAGGGTATTTAACACTCGC;TGTTCTTAAGACAAGCAGTG	-4.17;-3.13;-1.91;-1.53;-1.06;2.62	5147;23350;46089;52067;59192;76304	5.49E-01;4.89E-01;5.53E-01;4.83E-01;4.33E-01;3.85E-02	1138;18250;25378;31359;54092;72295	1.09E+00;5.46E-01;6.70E-01;8.45E-01;5.22E-01;1.79E-01
RAPGEF4	-1.98459	0.626006	6	GGAACGTGAGGTTCAATGAG;GGATTTCAACCGGATCCTAA;ACTGCTCTCCCTGGTAACGA;GCCGAGGCGGGCAGATCACG;GGAATCTCACTCTGTCACCC;GAAGATGGTGTTCTCAACCA	-3.3;-2.72;-2.05;-1.91;-1.53;-0.4	19708;32345;43972;46089;52067;67196	4.54E-01;5.22E-01;5.29E-01;5.11E-01;5.68E-01;3.70E-01	10246;25378;31359;33470;45113;57752	4.08E-01;4.83E-01;5.53E-01;7.73E-01;7.75E-01;7.64E-01
RAPGEF5	-2.29584	0.498485	4	TCTTGTGCGTCTAACATCTG;AAGACTTTACGTTTCCTACG;ATATTCGACCAGATGCCTCG;AGTGCTCTGTTATATACACG	-3.01;-2.85;-2.61;-0.71	25988;29537;34395;63820	4.05E-01;4.76E-01;7.10E-01;3.36E-01	13622;43047;47883;51468	4.05E-01;4.37E-01;4.43E-01;7.10E-01
RAPGEF6	-2.18191	0.52991	6	CTAGAAATCGAGTCATAGCA;CAAATGTAAACGTACCTGCA;GCTGATTCAGGACTGAAACG;CATCGGGAACTAGACCGGAG;CAAGGCAGGCAGATCACCTG;GAGAATCGCTTGAATCCGGG	-3.71;-3.69;-2.97;-2.63;-0.53;0.44	11642;11845;26898;34003;65843;73043	3.99E-01;7.43E-01;6.33E-01;7.56E-01;3.99E-01;1.52E-01	4399;11599;43423;50562;65608;65805	5.94E-01;7.55E-01;5.24E-01;4.84E-01;3.98E-01;4.24E-01
N4BP2L2	-1.69624	0.780536	6	GTGAAAAACATACGACTCTG;GCTATATATCTCATCGTCTG;CCAGGCATCTCATCATGCAA;GGAATCTCACTCTGTCACCC;CAAGGCAGGCAGATCACCTG;TGCTGATAATCACAATGTGA	-2.78;-2.55;-2.42;-1.53;-0.53;-0.37	31073;35573;37965;52067;65843;67484	7.32E-01;5.68E-01;5.06E-01;4.83E-01;3.99E-01;3.59E-01	9958;11599;25378;39477;41853;46349	4.12E-01;7.55E-01;6.70E-01;6.14E-01;8.96E-01;1.34E+00
RAPGEF1	-1.87446	0.765603	5	ATGTTGACTGTTACGCACAG;GCTCCCCCTGACAGACCGCG;GCCGAGGCGGGCAGATCACG;AATGGTCTTAAAGTAGCGCA;TAGCAGCAAAGGGCGCGTAG	-4.79;-4.19;-1.91;0.03;1.49	817;4951;46089;71063;75295	1.30E+00;1.47E+00;4.62E-01;5.35E-01;6.10E-02	2147;6379;31359;72486;76629	9.07E-01;1.28E+00;6.29E-01;6.10E-01;2.29E-02
RAPGEF2	-2.06732	0.582555	7	ACTGAAGCAGGCTTGAAACG;CTCACCGAGTCCTGAACATG;TAGTGAATATTGATCCGGGG;GCCGAGGCGGGCAGATCACG;GCTGGTGATATGGACCTGAG;CAAGGCAGGCAGATCACCTG;TCCTGCCTCAGCCTCCCGAG	-4.05;-3.89;-1.97;-1.91;-1.72;-0.53;-0.4	6624;8770;45252;46089;49036;65843;67218	4.56E-01;8.31E-01;6.81E-01;5.36E-01;5.41E-01;4.02E-01;4.30E-01	10224;11599;28406;31359;32195;68673;70818	4.03E-01;6.79E-01;5.56E-01;7.03E-01;1.05E+00;4.14E-01;2.72E-01
RAPGEF3	-2.85936	0.737583	4	GCAGCAGCTCCTCAAAGATG;CTGGAAGGGATCTGTCAACG;CTCACCGATAGAGCCTAAGG;GCTGGAAGAACATGGCAAAG	-3.55;-3.45;-3.25;-1.19	14414;16410;20682;57262	3.96E-01;7.76E-01;1.25E+00;5.24E-01	20180;56777;61044;63041	3.75E-01;6.39E-01;3.82E-01;3.57E-01
ZNF384	-1.22984	0.834358	5	CGTTACCCAGAATATCACGG;GGTAGCATCGACCCTAACCG;TGGCCCCCGAGTGGATACGG;CAAGGCAGGCAGATCACCTG;GCACATCCGTATACACTCAG	-3.97;-1.69;-1.29;-0.53;1.34	7577;49599;55652;65843;75121	4.89E-01;7.20E-01;5.32E-01;4.07E-01;6.60E-02	2321;11599;21790;27843;69871	8.77E-01;8.61E-01;9.39E-01;1.27E+00;2.23E-01
ZNF383	-2.51802	0.703336	6	AGCCACCTTGCAAAACAACT;GTTGGCAGAGAGCTTACAAG;CAGCATCAGAGAATTCACAC;TGTATAAGTCCCTCTGAACA;AAGTTGTGAGCTCTTAGTAA;GCCGAGGCGGGCAGATCACG	-3.24;-2.99;-2.92;-2.12;-1.93;-1.91	20914;26637;28089;42902;45769;46089	4.74E-01;4.83E-01;6.07E-01;5.51E-01;7.52E-01;1.35E+00	31359;31673;34536;49335;50830;56528	7.42E-01;5.14E-01;5.20E-01;4.87E-01;6.00E-01;8.20E-01
ZNF382	-2.67831	0.574267	4	GGAGCTTATTCAGCATCAGA;GATTACTTGGATGGACACTG;TCTTACCCACAGATACGAAG;ATGAGAAAACACATATAGAG	-3.7;-3.16;-2.74;-1.1	11673;22604;31819;58520	4.33E-01;5.91E-01;7.87E-01;4.87E-01	18922;45608;54823;65769	3.75E-01;4.54E-01;3.82E-01;2.84E-01
POC1B	-2.16357	0.671687	14	TACCTTGGAACGTATGACAC;GCAATGATAACAGAGGTGGT;CCATGGTAGGTGATCTGATG;GATCCACCCGTGTTCCCACG;TATCTGTAAGCTCTAGCATG;CTTGTATCGACATACACACT;ATAGAAAGCAATGATAACAG;ATTAGGACCAATAAGCGAGA;GCCGAGGCGGGCAGATCACG;GATTAGGACCAATAAGCGAG;TTCTACAAATCAGTTCACAG;CTGCCCGAGCAGTATTCTGT;CAAGGCAGGCAGATCACCTG;TCTCACGGTTCTGTCTCGTG	-3.7;-3.6;-3.59;-3.43;-3.13;-2.62;-2.46;-2.41;-1.91;-1.19;-1.14;-0.59;-0.53;0.0	11746;13553;13793;16847;23335;34245;37228;38128;46089;57302;58027;65212;65843;70531	6.02E-01;5.57E-01;6.24E-01;7.15E-01;7.05E-01;6.77E-01;6.83E-01;7.51E-01;6.90E-01;6.47E-01;6.20E-01;5.40E-01;5.94E-01;5.68E-01	6779;11599;12230;19415;20140;31359;39327;40214;43197;54119;60595;63649;63893;65703	4.29E-01;5.36E-01;6.65E-01;6.56E-01;8.00E-01;6.82E-01;6.80E-01;7.08E-01;7.52E-01;6.41E-01;5.98E-01;5.62E-01;6.97E-01;9.99E-01
RPL21P39	-3.02981	0.479697	1	GCACCCGATATATGTTCTCT	-3.03	25661	0.48	51794	0.175
RPL31P49	-2.96241	0.456114	1	CCGTTCTGCCATCAACGAAG	-2.96	27093	0.456	50365	0.187
KRTAP3-2	-1.5752	0.786289	5	CCAGTAACCAAACTGTGTGT;TGGTGGTGGCAGGCCCAGTG;GGACAGTTGTCACAGCAGAT;ACAGCGGCAGGATTTGTCGG;GGGGACACTGCAGCTGCGAG	-2.77;-2.49;-1.32;-0.75;-0.55	31294;36703;55199;63343;65645	5.94E-01;4.85E-01;5.25E-01;3.90E-01;3.59E-01	11797;14099;22243;40739;46148	4.05E-01;7.41E-01;9.19E-01;7.41E-01;1.12E+00
KRTAP3-3	-3.21683	0.927916	4	GAGGCTGCAGTGTCCCCACC;GGGGACACTGCAGCCTCGAG;CCAGTAACCAAACTGTGTGT;ACAGCGGCAGGATTTGTCAG	-4.55;-2.99;-2.77;-2.56	1945;26457;31294;35409	1.03E+00;5.18E-01;8.03E-01;1.36E+00	42033;46148;50962;75495	6.83E-01;4.59E-01;4.09E-01;4.42E-02
KRTAP3-1	-1.87216	0.712507	4	TTTATCAAATGAGCAGAAGG;TAGGTATCAGGCTTGCAGCA;TTTGATAAAAGCTGCCGCTG;TTGTTGAGCAGCCAGCAAGT	-2.52;-1.76;-1.75;-1.46	36126;48479;48555;53136	5.48E-01;4.83E-01;4.34E-01;6.54E-01	24306;28887;28963;41316	3.92E-01;4.84E-01;8.83E-01;1.09E+00
SCHLAP1	-2.96438	0.456739	1	TCTTCAAAGCCACATCATCG	-2.96	27054	0.457	50389	0.187
SNRPD3	-1.23769	1.09997	5	GCCGAGGCGGGCAGATCACG;CACATACAGAGATGGCCGAG;AAAGTACTGCATGAGGCCGA;CTGGAGCAGGTATACATCCG;ACACCGGTGAGGTATATCGG	-1.91;-1.43;-1.31;-0.81;-0.72	46089;53615;55392;62536;63641	1.10E+00;8.55E-01;5.28E-01;3.88E-01;4.26E-01	13801;14906;22055;23827;31359	3.91E-01;7.10E-01;9.28E-01;1.51E+00;1.96E+00
SNRPD2	-1.83556	0.57423	4	TGGAGAACGTGAAGGAGATG;GCGGCAGTTGATGAGCACTT;ACCCAGCACTCACCTATCGA;TGTGAGCACAGAGAGTGGAC	-3.01;-2.49;-1.77;-0.07	26062;36653;48308;69954	4.05E-01;4.28E-01;4.37E-01;1.77E-01	7488;29134;40777;51382	5.45E-01;4.81E-01;5.58E-01;7.13E-01
SNRPD1	-2.31056	0.487269	5	CTGGAAACGCTGAGTATTCG;TCCACAAGTAGTGTATCCAG;CAGGTCCATGGAACAATCAC;GTAACCATTGAATTGAAGAA;CAAGGCAGGCAGATCACCTG	-3.95;-2.64;-2.48;-1.95;-0.53	7911;33805;36833;45527;65843	4.79E-01;4.67E-01;5.29E-01;6.09E-01;3.52E-01	11599;31916;40623;43619;69537	4.07E-01;4.62E-01;4.86E-01;6.58E-01;2.34E-01
NMBR	-2.02829	0.487162	4	TCATCCAGCTCACTTCCGTG;GGAGACCACCCAGATACCCA;AGAGGGACGGGATCACACAG;TAAATGCTAATAATAGCAAG	-3.78;-2.86;-0.8;-0.67	10374;29365;62759;64247	4.58E-01;4.78E-01;3.94E-01;3.24E-01	13195;14683;48077;67068	4.10E-01;8.49E-01;4.40E-01;2.50E-01
RBMY1HP	-2.06702	0.874568	15	GAGTATGCTCCACCATCTAG;TGATTATGGTCATTCTCGTC;TATCCATGGCCTCTAGATGG;CGGGATGAAAGTTATTCTAG;TCTGCAAGAGGAAGCAGTGG;CGCATGTCAACAAGACATGA;TGACATGCGATCATTTCTCC;GATATTGTCGCTCTGCGTGG;GACGAGAATGACCATAATCA;ATCCAAGTTGCCAAGAAACG;GAAGCAGTGGAGGAACAAGA;TATGCATAGCCTCTAGATGG;GAAGATATTGTCGCTCTGCG;GATGGTTATGCAACTAACGA;ATGGTTATGCAACTAACGAT	-3.45;-3.13;-2.99;-2.91;-2.86;-2.82;-2.81;-2.7;-2.09;-2.03;-2.02;-1.39;-1.09;-0.87;2.16	16456;23413;26474;28321;29329;30235;30338;32561;43373;44240;44376;54164;58773;61793;75968	9.49E-01;1.05E+00;9.21E-01;7.87E-01;6.98E-01;6.86E-01;7.68E-01;8.60E-01;7.06E-01;7.93E-01;1.00E+00;7.71E-01;7.72E-01;8.91E-01;1.25E-01	1474;15649;18669;23278;33079;33202;34080;44895;47110;47184;48095;49141;50989;54027;60962	6.61E-01;6.42E-01;6.33E-01;6.61E-01;7.89E-01;6.96E-01;7.02E-01;7.21E-01;6.86E-01;7.15E-01;8.26E-01;1.02E+00;1.27E+00;1.53E+00;1.56E+00
IFT43	-1.95574	0.769265	5	CTGGGCAGGTGATTCCGTGA;TCTGATTTAACCTACCTGGG;AAACGCATCACAGAGATTTG;CAGGCCGAGAATCACCTCAA;GGAATCTCACTCTGTCACCC	-2.49;-2.22;-1.97;-1.57;-1.53	36564;41198;45195;51492;52067	7.37E-01;5.37E-01;4.63E-01;4.85E-01;8.62E-01	25378;25950;32247;36254;40892	4.75E-01;4.81E-01;6.09E-01;8.94E-01;1.39E+00
IFT46	-2.92447	0.810735	5	CCGTTGAGGTGTCAACTGTG;ATCCCAAAGCCATTGACACG;ACCAGAGTGAGAGCACCGTA;GCCGAGGCGGGCAGATCACG;TGGTCCAGGTCAATCAACTG	-4.08;-3.79;-3.41;-1.91;-1.42	6174;10226;17220;46089;53716	5.44E-01;9.43E-01;1.18E+00;5.95E-01;7.94E-01	23726;31359;60226;67212;71260	4.50E-01;4.62E-01;6.34E-01;4.26E-01;1.81E-01
GLDN	-1.79747	0.593716	5	CGGCAGCCAAGCATGTTCAA;GCATGTCATGGCTCTCGGCG;GCCGAGGCGGGCAGATCACG;GGCAACCCGCCGGCTCCCGG;AGGGAAATGAGGGCCCACCA	-4.44;-3.45;-1.91;-0.21;1.02	2730;16396;46089;68957;74602	8.16E-01;6.58E-01;4.62E-01;4.63E-01;8.11E-02	2840;8485;31359;61031;74712	8.02E-01;1.07E+00;6.29E-01;3.89E-01;7.79E-02
GLDC	-2.00783	0.600947	8	AGGGTAACTTCAGCTCAGTG;AAACCTGTTGAACACTTGAT;TCATTCCGAAATCAGCACAT;GGAGACAGCCCAAATATCCT;GCCGAGGCGGGCAGATCACG;GGAATCTCACTCTGTCACCC;CAAGGCAGGCAGATCACCTG;TGGCAGCCATATTCGCCAAG	-4.39;-2.93;-2.55;-2.39;-1.91;-1.53;-0.53;0.17	3078;27866;35493;38466;46089;52067;65843;71885	6.21E-01;6.03E-01;6.00E-01;5.63E-01;5.57E-01;5.56E-01;4.15E-01;2.59E-01	5557;11599;25378;31359;38989;41949;49552;74364	4.67E-01;6.25E-01;5.68E-01;6.27E-01;6.54E-01;8.28E-01;8.98E-01;1.41E-01
QPCT	-2.99616	0.833021	4	GACCCATAGAGAGAATCTTG;CGTGCCATGTGCAATGATGT;GCACCAGTATCTCTGAAATG;TCTTGAGTCAGACACCCTAT	-3.23;-3.2;-2.94;-2.61	21190;21719;27582;34422	3.77E-01;6.12E-01;9.34E-01;1.41E+00	43035;49860;55740;56273	7.10E-01;5.01E-01;3.79E-01;5.55E-01
PC	-2.69131	0.770624	8	GCTGTTTGTGCCGCCCAACG;CAGAGTAGATGGCTACGGTG;CAATGCCATCACCCGCATTG;CAATCTCTAAGGTCCCGTTG;GGTCCATGCTCAGATCCACG;TCGGACGCGGAACTCCGCAA;CCACAGCCCGAGTAGAACTG;CATCTCATACACGGGCGACG	-4.17;-3.3;-3.19;-3.17;-3.01;-2.47;-1.36;-0.88	5129;19735;22127;22562;26161;36993;54597;61753	4.84E-01;5.07E-01;6.15E-01;8.96E-01;1.15E+00;1.04E+00;6.90E-01;7.87E-01	15689;22845;40464;51281;54864;55315;57718;72306	4.79E-01;5.24E-01;7.03E-01;7.56E-01;6.06E-01;5.18E-01;5.85E-01;2.38E-01
LINC01837	-0.533336	0.82455	1	CAAGGCAGGCAGATCACCTG	-0.53	65843	0.0705	11599	0.825
LINC01835	-1.28548	0.909498	4	CCAATGCTGATAATTCTTTG;AACCAGGCGACATCCTGGAT;CAAAGGAGATACTCACATGT;CTTCCTGACATCAACTAACC	-2.31;-1.41;-0.77;-0.66	39769;53942;63123;64407	6.26E-01;5.72E-01;3.97E-01;3.20E-01	13035;14319;23500;37673	4.12E-01;8.66E-01;1.11E+00;1.25E+00
LINC01830	-0.466652	1.14447	2	CAAGGCAGGCAGATCACCTG;TCCTGCCTCAGCCTCCCGAG	-0.53;-0.4	65843;67218	5.94E-01;1.23E-01	10224;11599	6.40E-01;1.65E+00
DHRS11	-2.23777	0.530686	4	AGGAGCGGAATGTGGACGAT;TCACAGACAGGGGTAACACT;TTGATAGGTCACATCTGTAG;CCGCACTGTGGGCAACATCG	-2.96;-2.48;-2.2;-1.31	27232;36779;41478;55432	4.16E-01;4.28E-01;5.45E-01;5.81E-01	22010;35964;40677;50229	3.80E-01;4.30E-01;5.60E-01;7.52E-01
DHRS12	-1.89717	0.598738	4	CTGAACCAACATTCCTCCTG;GCCCTTGAAATCGCCAAGCG;TCTGGACCTCCAAGTCATGA;GGTGTGTACATTCTCACGAC	-4.65;-1.31;-1.19;-0.45	1426;55436;57320;66768	1.16E+00;6.05E-01;3.75E-01;2.58E-01	10674;20122;22006;76016	4.52E-01;6.54E-01;1.18E+00;3.23E-02
DHRS13	-1.89163	0.550342	4	TGCATAGCAGGTGACGCCAG;CACCCGTGACCACGGCCGTG;GGCATGTGCCCCTAGCCGCG;TGGATGAGGATGTCCAACCG	-3.47;-2.86;-0.65;-0.58	16056;29349;64483;65299	3.84E-01;4.78E-01;4.13E-01;2.96E-01	12143;12959;48112;61404	4.25E-01;9.34E-01;4.40E-01;4.03E-01
GPR89B	-2.86972	1.03573	10	CGGAGAACAATGTTCCAGAA;AAAGATGATGAGCTCAAACA;GGATCAGCAGAATTACACAC;AGCTGATCTATATGCTACCA;GAGAACAATGTTCCAGAAGG;TGTGATTGGAGTGACTCTCA;TCACTCCAATCACACCAACC;GCCGAGGCGGGCAGATCACG;AATACTCCAAAACCTTCAAG;TCCTGCCTCAGCCTCCCGAG	-4.64;-4.08;-4.04;-3.81;-3.23;-3.15;-2.16;-1.91;-1.27;-0.4	1467;6236;6641;9930;21211;22896;42243;46089;55940;67218	7.97E-01;8.27E-01;1.39E+00;1.60E+00;1.11E+00;1.46E+00;7.91E-01;9.35E-01;8.28E-01;6.15E-01	10224;21502;31359;35199;54525;56229;67524;70790;71208;75975	4.33E-01;5.90E-01;6.77E-01;6.27E-01;1.00E+00;7.61E-01;1.02E+00;7.91E-01;4.22E-01;8.30E-02
GPR89A	-2.86972	1.03573	10	CGGAGAACAATGTTCCAGAA;AAAGATGATGAGCTCAAACA;GGATCAGCAGAATTACACAC;AGCTGATCTATATGCTACCA;GAGAACAATGTTCCAGAAGG;TGTGATTGGAGTGACTCTCA;TCACTCCAATCACACCAACC;GCCGAGGCGGGCAGATCACG;AATACTCCAAAACCTTCAAG;TCCTGCCTCAGCCTCCCGAG	-4.64;-4.08;-4.04;-3.81;-3.23;-3.15;-2.16;-1.91;-1.27;-0.4	1467;6236;6641;9930;21211;22896;42243;46089;55940;67218	7.97E-01;8.27E-01;1.39E+00;1.60E+00;1.11E+00;1.46E+00;7.91E-01;9.35E-01;8.28E-01;6.15E-01	10224;21502;31359;35199;54525;56229;67524;70790;71208;75975	4.33E-01;5.90E-01;6.77E-01;6.27E-01;1.00E+00;7.61E-01;1.02E+00;7.91E-01;4.22E-01;8.30E-02
LOC107984271	-2.20573	0.459335	4	GTCTTCACAAAATCAGCTCA;TGTTGAGAATGACAAACTAG;GCCGAGGCGGGCAGATCACG;ACGACATGGTCCCTTACTGA	-3.71;-2.08;-1.91;-1.12	11541;43531;46089;58259	4.35E-01;4.39E-01;4.67E-01;4.94E-01	19183;31359;33911;65892	3.75E-01;4.58E-01;7.24E-01;2.81E-01
MAP1LC3B2	-2.08247	0.547912	5	GGTGATAATAGAACGATACA;GATGCTGCTCTCGAATAAGT;TGAGCTCACTCATGTTGACA;GTGATAATAGAACGATACAA;CGGAGAAGACCTTCAAGCAG	-3.52;-2.5;-1.83;-1.53;-1.03	14962;36486;47381;52060;59588	3.88E-01;4.84E-01;4.62E-01;4.75E-01;5.69E-01	17854;25375;30061;40956;62499	3.94E-01;4.86E-01;6.60E-01;7.35E-01;4.66E-01
LGMN	-0.988786	0.824694	5	TGCCGGATAACATCAATGGT;GGAGTCCCGAAGGACTACAC;GTTCGTCAGGAATCCCATTG;CAAGGCAGGCAGATCACCTG;TGTTTCCATACTGCATGACG	-4.79;-2.47;-1.49;-0.53;4.35	808;36905;52613;65843;77109	1.30E+00;4.87E-01;4.92E-01;4.07E-01;9.33E-03	333;11599;24829;40538;76634	1.68E+00;8.61E-01;8.18E-01;7.47E-01;2.27E-02
NBDY	-1.44479	0.606104	2	GCTGCAGGATTCAATAAACT;CAGTTTCAGCATCAGGCAAG	-2.99;0.1	26631;71467	3.46E-01;6.97E-02	5975;50828	8.46E-01;3.66E-01
CAPS2	-2.3001	0.684545	9	TGAGTATATGGAGTTTGACA;CAAGACATGCCATTACGGCT;GGAGAAAATATCTGGTTAGG;GAAGCCCACAACGAATGGCG;TTGATGGTAGGATCGTATCA;AGTCTGTGGCCATTATACAC;AGGCTTCCCAAATCAAGTCG;CAACATAAAAATCACCAAGT;CAAGGCAGGCAGATCACCTG	-4.41;-3.71;-2.53;-2.09;-2.01;-2.01;-1.77;-1.64;-0.53	2918;11547;35980;43394;44513;44569;48222;50427;65843	6.03E-01;5.88E-01;7.02E-01;6.90E-01;5.88E-01;6.32E-01;7.30E-01;9.94E-01;6.34E-01	11599;27015;29220;32873;32929;34048;41469;65901;74524	4.34E-01;6.63E-01;5.80E-01;5.88E-01;7.19E-01;9.72E-01;1.01E+00;4.33E-01;1.50E-01
EHMT1	-2.7196	1.06356	7	TTCGGCTGCTTCCATCAACG;ACTTATACGACTCAGAACCT;CAACACACTAACTCGGATAG;GCCGAGGCGGGCAGATCACG;GGGCCGGTGCACAAACAGCG;GGAATCTCACTCTGTCACCC;CAAGGCAGGCAGATCACCTG	-5.2;-4.49;-3.8;-1.91;-1.57;-1.53;-0.53	89;2359;10098;46089;51418;52067;65843	2.10E+00;1.78E+00;1.35E+00;5.36E-01;5.14E-01;6.74E-01;4.93E-01	11599;25378;26024;31359;67344;75085;77353	4.02E-01;5.09E-01;5.88E-01;7.03E-01;7.51E-01;7.52E-01;3.46E-03
EHMT2	-4.2087	2.34695	4	CGGACAGGTACAACTGCCGA;CAAGAGGTGACCATCCCCCG;CTCTCCGTCCACACTCTCAG;CTCCAGGTGGTTGTTCACCA	-4.55;-4.4;-4.04;-3.85	1975;3060;6651;9398	1.02E+00;2.06E+00;2.64E+00;3.66E+00	68041;70805;74382;75467	2.20E+00;1.43E+00;8.54E-01;4.49E-02
ADIPOR2	-2.20376	0.648857	5	CTCATGATGTACTACCAGAC;AGTCTACTGCCACTCAGAGG;ATGATGGGCTTGTAAGAGAG;GCCGAGGCGGGCAGATCACG;ACAGGAAGAATACACAACCT	-2.69;-2.68;-2.38;-1.91;-1.36	32936;33115;38530;46089;54652	6.35E-01;4.65E-01;5.07E-01;5.95E-01;7.57E-01	22790;31359;38912;44327;44506	4.38E-01;4.62E-01;5.03E-01;6.39E-01;1.20E+00
ADIPOR1	-0.0550226	1.85798	4	TTTCTCTGAATGACAATAGA;GACAACGACTATCTGCTACA;GTATATGTTCTAGGTCTGGG;CCAGGACACAGACGATGGAG	-1.23;0.06;0.23;0.72	56614;71274;72179;73926	1.25E+00;1.49E+00;6.57E-01;8.07E-02	3516;5263;6168;20828	8.01E-01;1.62E+00;2.73E+00;2.28E+00
NBPF26	-1.76332	0.93601	8	GCTGCTGTAAGACTTGTACG;CAAGAAGAGGAAGAAGACCA;TTAAAGGAGAAGTTACGGGA;AACTAAAAAGGACCAAGAAG;GAGGCTGGTTGGAGTCACAA;GTGGGATCAAGTGAAAAAGG;TCTAGAAAATGACGAAGATG;AGAGCAGCTCAAGCAAGCTG	-2.85;-2.32;-2.13;-2.07;-2.0;-1.08;-0.89;-0.78	29575;39509;42736;43653;44793;58928;61570;62974	9.78E-01;9.97E-01;7.69E-01;5.92E-01;5.66E-01;5.08E-01;4.82E-01;7.19E-01	14469;15872;18514;32663;33776;34718;37946;47849	4.54E-01;5.27E-01;7.09E-01;6.06E-01;8.00E-01;1.16E+00;1.56E+00;1.67E+00
NBPF20	-1.65644	1.06918	11	TACGAGGCCAACATTTCAGG;GCTGCTGTAAGACTGGTACG;CAAGAAGAGGAAGAAGACCA;AGTGAAAAAGGAGGACCAAG;AAGTCACCTGGGGCATGGTG;AACTAAAAAGGACCAAGAAG;ATGGCTATTTGAATAAGTGA;GTGGGATCAAGTGAAAAAGG;AGAGCAGCTCAAGCAAGCTG;CCTACTTTCCAGGCTCAGCA;TGTTTGTTCTCTGCCAACTG	-2.87;-2.71;-2.32;-2.27;-2.26;-2.07;-1.32;-1.08;-0.78;-0.45;-0.09	29108;32423;39509;40374;40610;43653;55208;58928;62974;66718;69818	1.43E+00;1.14E+00;1.14E+00;8.53E-01;6.74E-01;6.30E-01;6.78E-01;5.96E-01;5.25E-01;4.65E-01;4.95E-01	7624;10724;14469;18514;22231;33776;36832;37053;37946;45021;48322	4.15E-01;5.59E-01;6.87E-01;7.98E-01;9.27E-01;7.42E-01;8.62E-01;1.19E+00;1.63E+00;1.69E+00;2.25E+00
MARK4	-1.88159	0.69008	7	CCCTCGACTCCCACTCCCCG;AAAGACAAATGGATCAACAT;TACTCACCTCCCGACCAGTG;TCATGCGGCCATGCGACACG;GCCGAGGCGGGCAGATCACG;CAAGGCAGGCAGATCACCTG;TCCTGCCTCAGCCTCCCGAG	-3.48;-2.83;-2.04;-1.97;-1.91;-0.53;-0.4	15842;29924;44108;45170;46089;65843;67218	4.40E-01;5.64E-01;6.54E-01;5.33E-01;5.90E-01;4.02E-01;4.30E-01	10224;11599;31359;32272;33334;47497;61611	4.03E-01;6.79E-01;5.35E-01;6.79E-01;9.97E-01;8.41E-01;6.95E-01
STOX1	-2.43071	0.624086	5	AGCTCAGATTGTAGTAACGC;GTTTGGTGCTCTCACAAATG;CCGCATAGTCTGCCATCACG;GCCGAGGCGGGCAGATCACG;TTCCTCGGTGAGACAAACCC	-4.49;-2.32;-2.24;-1.91;-1.18	2340;39475;40909;46089;57327	8.74E-01;5.14E-01;4.84E-01;5.95E-01;6.53E-01	20115;31359;36533;37967;75099	4.09E-01;4.62E-01;5.33E-01;8.32E-01;6.67E-02
[truncated: 22,603 more rows]
