# Supplementary material for: A GPX4-dependent cancer cell state underlies the clear-cell morphology and confers sensitivity to ferroptosis
Source: Nat Commun. 2019 Apr 8;10:1617. doi: 10.1038/s41467-019-09277-9 (PMC6453886; doi:10.1038/s41467-019-09277-9)
Supplement: Supplementary file 5 — Supplementary Data 2 [file 41467_2019_9277_MOESM5_ESM.xlsx]

## Sheet: Table S2.CRISPR.screen.day6
Supplementary Data 2	CRISPR screen analysis of day 6 ML210 vs DMSO-treated conditions
Gene Symbol	Average LFC	Average -log(p-values)	Number of perturbations	Perturbations	Individual LFCs	Ascending ranks	Individual ascending -log(p-values)	Descending ranks	Individual descending -log(p-values)
ACSL4	6.56441	8.8805	5	CAAGGCAGGCAGATCACCTG;AAGCCCACTTCAGACAAACC;ACCTGGTCAGAGAGTGTAAG;GTGTGTCTGAGGAGATAGCG;GCATCATCACTCCCTTAGGT	-0.53;8.25;8.3;8.38;8.42	36237;77438;77439;77440;77441	7.27E-01;1.29E+01;8.48E+00;4.19E+00;-0.00E+00	1;2;3;4;41205	4.19E+00;8.48E+00;1.29E+01;1.75E+01;1.37E+00
TMEM164	4.69279	8.55643	4	ACGACGATAGCTCCCCGACA;CCTGTGCCTGACCTTCGGGG;CATCCTGAGGCAGACGAAGG;AGTAAATCTCCAATTCAAAG	4.52;4.65;4.79;4.82	77421;77422;77424;77426	1.02E+01;6.47E+00;3.06E+00;3.37E-04	16;18;20;21	3.08E+00;6.51E+00;1.02E+01;1.44E+01
AGPAT3	4.68516	8.61659	5	GCCGAGGCGGGCAGATCACG;CAAGCACCGCGTTAGCATGG;CTTCCCAAAGCGCTCTACCG;CACTCACCCACATGTACTCG;TACCACGTCCAGCCGATGAG	1.75;5.2;5.23;5.56;5.69	75411;77428;77429;77433;77435	5.64E+00;1.04E+01;6.66E+00;3.29E+00;1.68E-04	7;9;13;14;2031	3.35E+00;6.92E+00;1.04E+01;1.45E+01;7.91E+00
KEAP1	4.13046	7.20815	5	CAAGGCAGGCAGATCACCTG;CCTGGAGGATCATACCAAGC;CAGCACCGTTCATGACGTGG;AGTACGACTGCGAACAGCGA;ACAACCCCATGACCAATCAG	-0.53;4.68;5.41;5.48;5.61	36237;77423;77431;77432;77434	7.27E-01;9.98E+00;6.82E+00;3.24E+00;1.96E-04	8;10;11;19;41205	3.29E+00;6.82E+00;1.07E+01;1.39E+01;1.37E+00
PSMD4	3.93488	7.62988	4	CTCTTCCATAGATACACGAA;CTCCACTGGGCTTCCCACAA;ACTGGCTAAACGCCTCAAGA;TAGGACTCACATGGGCCACG	3.39;3.45;3.59;5.31	77385;77391;77400;77430	8.84E+00;5.61E+00;2.67E+00;2.47E-04	12;42;51;57	3.21E+00;5.76E+00;8.97E+00;1.26E+01
POR	3.69891	7.42084	4	ACATGCCTCGCATCCCGTAG;GTGGTCCCCAGATTCATACC;TCGTACAGCACGTTGGTACG;ACGGATTCTTGGCATCAAAG	3.01;3.6;4.07;4.12	77333;77401;77414;77416	7.98E+00;5.81E+00;2.86E+00;5.61E-04	26;28;41;109	2.87E+00;6.12E+00;9.26E+00;1.14E+01
LOC107984298	3.3894	3.14078	1	GTGCTAGAACACGTGTCAGG	3.39	77386	0.000309	56	3.14
TXNDC17	2.8381	5.71479	4	CTGAACCAGTCGTACGAGAG;CGGGTTCTAAGGACGCCGGG;GGGCTGAAGCACATTAGTGA;CCTCACCCTGCACGCAGTCG	2.27;2.7;2.92;3.47	76851;77224;77305;77393	5.76E+00;4.33E+00;2.16E+00;1.08E-03	49;137;218;591	2.60E+00;4.73E+00;7.06E+00;8.47E+00
RBMY2HP	2.61516	2.456	1	TGCCAAAGATATGAATGGAA	2.62	77171	0.00152	271	2.46
PPIAP7	2.59653	2.43872	1	GCCAAGACTGAGTGGTTGGA	2.6	77160	0.00158	282	2.44
LOC101928610	2.59653	2.43872	1	GCCAAGACTGAGTGGTTGGA	2.6	77160	0.00158	282	2.44
LOC105370314	2.59653	2.43872	1	GCCAAGACTGAGTGGTTGGA	2.6	77160	0.00158	282	2.44
PPIAP16	2.59653	2.43872	1	GCCAAGACTGAGTGGTTGGA	2.6	77160	0.00158	282	2.44
PPIAP23	2.59653	2.43872	1	GCCAAGACTGAGTGGTTGGA	2.6	77160	0.00158	282	2.44
LOC100129144	2.59302	2.43565	1	AAGGTGTGAGGACTGCCTAA	2.59	77158	0.00159	284	2.44
LOC105373759	2.55843	2.40042	1	CTAATACCTCCTCCCCCCGG	2.56	77134	0.00173	308	2.4
EP300	2.52456	5.50564	6	CAAGGCAGGCAGATCACCTG;GCCGAGGCGGGCAGATCACG;ATGGTGAACCATAAGGATTG;GGTACGACTAGGTACAGGCG;CTGTAATAAGTGGCATCACG;GTGGCACGAAGATATTACTC	-0.53;1.75;2.48;3.23;3.79;4.44	36237;75411;77073;77368;77409;77420	9.22E-01;5.17E+00;5.68E+00;4.88E+00;2.61E+00;7.07E-04	22;33;74;369;2031;41205	2.77E+00;5.58E+00;7.78E+00;8.12E+00;7.14E+00;1.64E+00
AGPS	2.50603	4.65077	4	TGCCACTAAGAGGGTACCTA;GAATATCTATGGCAATATCG;GTACCAATGAGTGCAAAGCG;CAATTTGACAGCTCATGTAG	1.84;1.95;2.82;3.42	75832;76164;77276;77388	4.46E+00;2.80E+00;2.07E+00;1.19E-03	54;166;1278;1610	2.56E+00;4.56E+00;4.75E+00;6.73E+00
FAR1	2.46546	4.72485	4	CAACTGGCACCAACAATCGA;AATATGCTTGCGATTACAGT;ACAGACACCACAAGAGCGAG;AGCACTAATCCTTTCCACTG	1.94;1.96;2.89;3.07	76155;76197;77297;77347	4.75E+00;2.82E+00;2.13E+00;2.11E-03	95;145;1245;1287	2.31E+00;4.68E+00;4.79E+00;7.12E+00
LOC107987115	2.45778	2.29679	1	TCAGTTCATTCCAGGCCGTG	2.46	77051	0.00219	391	2.3
ARL2BPP9	2.45593	2.29568	1	TTTCATGGACAAGTACTACC	2.46	77050	0.0022	392	2.3
ARL2BPP7	2.45593	2.29568	1	TTTCATGGACAAGTACTACC	2.46	77050	0.0022	392	2.3
RETSAT	2.20991	4.36269	5	CAAGGCAGGCAGATCACCTG;TACCATGATGTCAAAAGGAG;GTCAACCACTACATGAAAGG;GCTGAACCACGGGCAATGGG;CCTATGAACACCTACTGCCG	-0.53;1.64;2.94;3.31;3.69	36237;74909;77316;77378;77406	7.27E-01;3.49E+00;4.59E+00;2.39E+00;9.82E-04	36;64;126;2533;41205	2.63E+00;5.17E+00;7.38E+00;5.26E+00;1.37E+00
GNPAT	2.20558	3.85526	4	GTAATTCCCTTATAGACAAG;GAGTCGGAGCTCATATAACT;TCAATGTAACTTCGATGACT;ATGGCTAAAAGGCTTAACCC	1.61;1.69;2.06;3.46	74675;75147;76483;77392	3.76E+00;2.30E+00;1.32E+00;1.10E-03	50;959;2295;2767	2.59E+00;3.05E+00;4.00E+00;5.79E+00
LOC105372707	2.20452	2.05012	1	CACGAACTCTCTGCGCTAGG	2.2	76752	0.00388	690	2.05
PIPSL	2.19953	2.04761	1	GTTAGGCATTACCCACACTG	2.2	76748	0.0039	694	2.05
PEX19	2.19388	4.24495	4	TAATACTCTGCATGATGGGG;AGCCACTGCGGAGTTCGAGA;AGAAGTGAATTCTTGTTGGG;CTGGGGCCCCGAAGCATCAG	1.84;1.97;2.3;2.66	75828;76237;76893;77194	4.45E+00;2.85E+00;1.56E+00;5.55E-03	248;549;1205;1614	1.90E+00;3.53E+00;4.83E+00;6.73E+00
SMG7	2.19005	4.11071	4	GGGGGGATAACATATGTTGG;GGATTGCTGATAATCAGCCA;TACTCAGGTACACATGACCG;CCTTACCACTAATACTTGAG	1.62;1.94;2.51;2.69	74729;76150;77105;77213	3.78E+00;2.79E+00;1.77E+00;5.12E-03	229;337;1292;2713	1.93E+00;3.95E+00;4.74E+00;5.82E+00
PEX7	2.12318	4.70423	5	GCCGAGGCGGGCAGATCACG;ATCTGGATCCAATATTAGTA;TTGTAGTGGGATCCAACTGT;AGGCTGAAGCAAAACAACCA;CTATAAAGAACACGCTCAGG	1.75;1.89;1.97;2.09;2.92	75411;76011;76225;76540;77306	5.64E+00;4.22E+00;2.63E+00;1.26E+00;3.79E-03	136;902;1217;1431;2031	2.06E+00;2.88E+00;4.43E+00;6.24E+00;7.91E+00
TMEM30A	2.11871	3.45321	4	GTAGCACCGTGCCAGCCGTA;GAGATTTCACGTAACGACGA;TTGTACCATTAACTTCACAC;CATTTATTACAGGGACTGGA	1.06;1.22;2.88;3.32	69277;71344;77294;77380	2.38E+00;1.50E+00;2.12E+00;1.37E-03	62;148;6098;8165	2.50E+00;4.66E+00;2.75E+00;3.91E+00
PEX2	2.07296	3.82832	4	TGGCTGATATCTCAGGTTAG;ACTTGAACTAAACAAGGCCC;AAAATACAGAATGAATACCT;CTACTCCAAAAATGCCACAG	1.44;2.04;2.09;2.72	73530;76435;76533;77233	3.31E+00;3.01E+00;1.34E+00;4.67E-03	209;909;1007;3912	1.97E+00;3.09E+00;5.06E+00;5.19E+00
TFRC	2.0637	4.134	5	AAATTCATATGTCCCTCGTG;GCCGAGGCGGGCAGATCACG;AATTGGTGTGTTGATATACA;CAGGAACCGAGTCTCCAGTG;CTATACGCCACATAACCCCC	1.06;1.75;1.99;2.33;3.19	69291;75411;76296;76925;77360	3.26E+00;3.77E+00;2.68E+00;1.49E+00;2.27E-03	82;517;1146;2031;8151	2.28E+00;3.36E+00;4.50E+00;5.64E+00;4.89E+00
TADA2B	2.05167	3.68614	4	ATCTCGTAATCATCCCGCAG;CATGACATGAACTGGTACAG;ACAGACCACACCTGTCCCAG;TCCGCACGTACATGTCCACG	0.96;2.14;2.47;2.63	67890;76650;77068;77181	2.18E+00;3.21E+00;1.72E+00;5.84E-03	261;374;792;9552	1.87E+00;3.86E+00;5.37E+00;3.64E+00
FOSL1	2.03589	3.41664	4	CCAAGCATCAACACCATGAG;TATTCCTTAGAAGTTCCACC;TGGTACAGCCTCATTTCCTG;AGTACAGCCCCCCACAACCC	1.1;1.39;2.66;3.0	69852;73010;77199;77332	2.47E+00;1.76E+00;1.91E+00;2.45E-03	110;243;4432;7590	2.25E+00;4.23E+00;3.15E+00;4.04E+00
SELENOI	2.00149	3.49514	4	AGATTGGGCGCCAGCCAAGT;TGACTGGGTTTGGATTGTAG;CAATTCTAGCACTCCCTTAG;TGGCTAATGTCATATCCCCA	0.24;2.32;2.47;2.98	53207;76905;77072;77323	1.07E+00;3.55E+00;1.73E+00;2.65E-03	119;370;537;24235	2.21E+00;3.87E+00;5.88E+00;2.02E+00
MED12	1.94569	3.29355	4	GTGGCGTACTGCACGTGTCG;CAGTGAGTAGTGCCAAACCA;ACATCGACTGCTGGACAATG;TTCACATTATGACCAACACC	0.0;2.15;2.38;3.25	47649;76667;76980;77372	8.53E-01;3.23E+00;1.63E+00;1.55E-03	70;462;775;29928	2.44E+00;3.68E+00;5.40E+00;1.65E+00
CCDC58P1	1.8528	1.69668	1	CAGTGGCGGTGTGAACTGTG	1.85	75885	0.00882	1557	1.7
EIF1P7	1.82496	1.66965	1	GAATTCAACAGAGAAACGGC	1.82	75785	0.00939	1657	1.67
C7orf26	1.82343	2.68691	4	ACATGGCCATTGGATAAGGG;TAACCTCACACAGTAAACCA;GTCATAGAGCGCGGTAACGG;AAAGTGATGAGAATCAACCT	0.79;1.26;1.51;3.73	65054;71820;74026;77407	1.86E+00;1.57E+00;8.12E-01;7.63E-04	35;3416;5622;12388	2.74E+00;1.97E+00;2.85E+00;3.18E+00
SMG9	1.79896	2.93773	4	AGAGGGACTACATTGCACCA;GCTGAAATGAAGGAACGAGG;CCTGGACAACAATCACCACA;TGACAACAATGACATGACCA	0.95;1.18;2.25;2.81	67707;70873;76831;77273	2.16E+00;1.44E+00;1.51E+00;3.77E-03	169;611;6569;9735	2.06E+00;3.44E+00;2.65E+00;3.60E+00
C16orf92	1.76446	2.53925	4	CCTGAGTTAATGAACACGAT;TCAGGTCTGTCTAAGAAGCG;GGGTTTCTCTCCAATAAACT;TCCGGATAATCGAAGAAGTC	0.8;0.94;1.56;3.76	65138;67597;74372;77408	1.87E+00;1.13E+00;8.53E-01;7.40E-04	34;3070;9845;12304	2.76E+00;2.06E+00;2.14E+00;3.20E+00
LOC107987079	1.74715	1.58126	1	GCCGAGGCGGGCAGATCACG	1.75	75411	0.0115	2031	1.58
MRPS31P4	1.74715	1.58126	1	GCCGAGGCGGGCAGATCACG	1.75	75411	0.0115	2031	1.58
LINC01099	1.74715	1.58126	1	GCCGAGGCGGGCAGATCACG	1.75	75411	0.0115	2031	1.58
LOC105371393	1.74715	1.58126	1	GCCGAGGCGGGCAGATCACG	1.75	75411	0.0115	2031	1.58
LINC00327	1.74715	1.58126	1	GCCGAGGCGGGCAGATCACG	1.75	75411	0.0115	2031	1.58
LOC101929727	1.74715	1.58126	1	GCCGAGGCGGGCAGATCACG	1.75	75411	0.0115	2031	1.58
LOC100288798	1.74715	1.58126	1	GCCGAGGCGGGCAGATCACG	1.75	75411	0.0115	2031	1.58
LOC105373606	1.74715	1.58126	1	GCCGAGGCGGGCAGATCACG	1.75	75411	0.0115	2031	1.58
WASIR1	1.74715	1.58126	1	GCCGAGGCGGGCAGATCACG	1.75	75411	0.0115	2031	1.58
LOC105374839	1.74715	1.58126	1	GCCGAGGCGGGCAGATCACG	1.75	75411	0.0115	2031	1.58
LOC105372741	1.74715	1.58126	1	GCCGAGGCGGGCAGATCACG	1.75	75411	0.0115	2031	1.58
LOC105372745	1.74715	1.58126	1	GCCGAGGCGGGCAGATCACG	1.75	75411	0.0115	2031	1.58
LOC107984782	1.74715	1.58126	1	GCCGAGGCGGGCAGATCACG	1.75	75411	0.0115	2031	1.58
LINC02424	1.74715	1.58126	1	GCCGAGGCGGGCAGATCACG	1.75	75411	0.0115	2031	1.58
LOC105379220	1.74715	1.58126	1	GCCGAGGCGGGCAGATCACG	1.75	75411	0.0115	2031	1.58
LOC100128239	1.74715	1.58126	1	GCCGAGGCGGGCAGATCACG	1.75	75411	0.0115	2031	1.58
LOC105372462	1.74715	1.58126	1	GCCGAGGCGGGCAGATCACG	1.75	75411	0.0115	2031	1.58
LOC105371799	1.74715	1.58126	1	GCCGAGGCGGGCAGATCACG	1.75	75411	0.0115	2031	1.58
LOC107985840	1.74715	1.58126	1	GCCGAGGCGGGCAGATCACG	1.75	75411	0.0115	2031	1.58
LOC107984089	1.74715	1.58126	1	GCCGAGGCGGGCAGATCACG	1.75	75411	0.0115	2031	1.58
LOC105375779	1.74715	1.58126	1	GCCGAGGCGGGCAGATCACG	1.75	75411	0.0115	2031	1.58
LOC105371064	1.74715	1.58126	1	GCCGAGGCGGGCAGATCACG	1.75	75411	0.0115	2031	1.58
LOC105371069	1.74715	1.58126	1	GCCGAGGCGGGCAGATCACG	1.75	75411	0.0115	2031	1.58
LOC101927414	1.74715	1.58126	1	GCCGAGGCGGGCAGATCACG	1.75	75411	0.0115	2031	1.58
LINC00871	1.74715	1.58126	1	GCCGAGGCGGGCAGATCACG	1.75	75411	0.0115	2031	1.58
LOC105372211	1.74715	1.58126	1	GCCGAGGCGGGCAGATCACG	1.75	75411	0.0115	2031	1.58
LOC105370163	1.74715	1.58126	1	GCCGAGGCGGGCAGATCACG	1.75	75411	0.0115	2031	1.58
LOC107984704	1.74715	1.58126	1	GCCGAGGCGGGCAGATCACG	1.75	75411	0.0115	2031	1.58
CCDC18-AS1	1.74715	1.58126	1	GCCGAGGCGGGCAGATCACG	1.75	75411	0.0115	2031	1.58
LOC105378824	1.74715	1.58126	1	GCCGAGGCGGGCAGATCACG	1.75	75411	0.0115	2031	1.58
SLC12A9-AS1	1.74715	1.58126	1	GCCGAGGCGGGCAGATCACG	1.75	75411	0.0115	2031	1.58
LOC105375282	1.74715	1.58126	1	GCCGAGGCGGGCAGATCACG	1.75	75411	0.0115	2031	1.58
LOC101927025	1.74715	1.58126	1	GCCGAGGCGGGCAGATCACG	1.75	75411	0.0115	2031	1.58
ISX-AS1	1.74715	1.58126	1	GCCGAGGCGGGCAGATCACG	1.75	75411	0.0115	2031	1.58
MIR3945HG	1.74715	1.58126	1	GCCGAGGCGGGCAGATCACG	1.75	75411	0.0115	2031	1.58
LOC107984919	1.74715	1.58126	1	GCCGAGGCGGGCAGATCACG	1.75	75411	0.0115	2031	1.58
LOC100507002	1.74715	1.58126	1	GCCGAGGCGGGCAGATCACG	1.75	75411	0.0115	2031	1.58
ANAPC1P1	1.74715	1.58126	1	GCCGAGGCGGGCAGATCACG	1.75	75411	0.0115	2031	1.58
LOC105379144	1.74715	1.58126	1	GCCGAGGCGGGCAGATCACG	1.75	75411	0.0115	2031	1.58
LINC01320	1.74715	1.58126	1	GCCGAGGCGGGCAGATCACG	1.75	75411	0.0115	2031	1.58
LOC107986665	1.74715	1.58126	1	GCCGAGGCGGGCAGATCACG	1.75	75411	0.0115	2031	1.58
LOC102723596	1.74715	1.58126	1	GCCGAGGCGGGCAGATCACG	1.75	75411	0.0115	2031	1.58
LOC100132077	1.74715	1.58126	1	GCCGAGGCGGGCAGATCACG	1.75	75411	0.0115	2031	1.58
MFSD14C	1.74715	1.58126	1	GCCGAGGCGGGCAGATCACG	1.75	75411	0.0115	2031	1.58
LOC101060324	1.74715	1.58126	1	GCCGAGGCGGGCAGATCACG	1.75	75411	0.0115	2031	1.58
LOC105374294	1.74715	1.58126	1	GCCGAGGCGGGCAGATCACG	1.75	75411	0.0115	2031	1.58
LOC101927490	1.74715	1.58126	1	GCCGAGGCGGGCAGATCACG	1.75	75411	0.0115	2031	1.58
LOC101928446	1.74715	1.58126	1	GCCGAGGCGGGCAGATCACG	1.75	75411	0.0115	2031	1.58
LOC101928445	1.74715	1.58126	1	GCCGAGGCGGGCAGATCACG	1.75	75411	0.0115	2031	1.58
LOC101929427	1.74715	1.58126	1	GCCGAGGCGGGCAGATCACG	1.75	75411	0.0115	2031	1.58
LOC107985141	1.74715	1.58126	1	GCCGAGGCGGGCAGATCACG	1.75	75411	0.0115	2031	1.58
HCG18	1.74715	1.58126	1	GCCGAGGCGGGCAGATCACG	1.75	75411	0.0115	2031	1.58
AACSP1	1.74715	1.58126	1	GCCGAGGCGGGCAGATCACG	1.75	75411	0.0115	2031	1.58
LOC102606465	1.74715	1.58126	1	GCCGAGGCGGGCAGATCACG	1.75	75411	0.0115	2031	1.58
LINC01426	1.74715	1.58126	1	GCCGAGGCGGGCAGATCACG	1.75	75411	0.0115	2031	1.58
LOC107986493	1.74715	1.58126	1	GCCGAGGCGGGCAGATCACG	1.75	75411	0.0115	2031	1.58
LOC101927511	1.74715	1.58126	1	GCCGAGGCGGGCAGATCACG	1.75	75411	0.0115	2031	1.58
LOC101927518	1.74715	1.58126	1	GCCGAGGCGGGCAGATCACG	1.75	75411	0.0115	2031	1.58
LOC107986807	1.74715	1.58126	1	GCCGAGGCGGGCAGATCACG	1.75	75411	0.0115	2031	1.58
LOC286059	1.74715	1.58126	1	GCCGAGGCGGGCAGATCACG	1.75	75411	0.0115	2031	1.58
LOC105375574	1.74715	1.58126	1	GCCGAGGCGGGCAGATCACG	1.75	75411	0.0115	2031	1.58
LOC105378789	1.74715	1.58126	1	GCCGAGGCGGGCAGATCACG	1.75	75411	0.0115	2031	1.58
WASIR2	1.74715	1.58126	1	GCCGAGGCGGGCAGATCACG	1.75	75411	0.0115	2031	1.58
LOC105370204	1.74715	1.58126	1	GCCGAGGCGGGCAGATCACG	1.75	75411	0.0115	2031	1.58
LOC107984621	1.74715	1.58126	1	GCCGAGGCGGGCAGATCACG	1.75	75411	0.0115	2031	1.58
LINC01901	1.74715	1.58126	1	GCCGAGGCGGGCAGATCACG	1.75	75411	0.0115	2031	1.58
LOC105378909	1.74715	1.58126	1	GCCGAGGCGGGCAGATCACG	1.75	75411	0.0115	2031	1.58
LOC105378573	1.74715	1.58126	1	GCCGAGGCGGGCAGATCACG	1.75	75411	0.0115	2031	1.58
LOC105369928	1.74715	1.58126	1	GCCGAGGCGGGCAGATCACG	1.75	75411	0.0115	2031	1.58
LOC100422352	1.74715	1.58126	1	GCCGAGGCGGGCAGATCACG	1.75	75411	0.0115	2031	1.58
LOC105376747	1.74715	1.58126	1	GCCGAGGCGGGCAGATCACG	1.75	75411	0.0115	2031	1.58
LOC105378005	1.74715	1.58126	1	GCCGAGGCGGGCAGATCACG	1.75	75411	0.0115	2031	1.58
LOC105378008	1.74715	1.58126	1	GCCGAGGCGGGCAGATCACG	1.75	75411	0.0115	2031	1.58
LOC101927845	1.74715	1.58126	1	GCCGAGGCGGGCAGATCACG	1.75	75411	0.0115	2031	1.58
GCC2-AS1	1.74715	1.58126	1	GCCGAGGCGGGCAGATCACG	1.75	75411	0.0115	2031	1.58
LOC105374026	1.74715	1.58126	1	GCCGAGGCGGGCAGATCACG	1.75	75411	0.0115	2031	1.58
ZNF793-AS1	1.74715	1.58126	1	GCCGAGGCGGGCAGATCACG	1.75	75411	0.0115	2031	1.58
LOC105371753	1.74715	1.58126	1	GCCGAGGCGGGCAGATCACG	1.75	75411	0.0115	2031	1.58
LOC105370538	1.74715	1.58126	1	GCCGAGGCGGGCAGATCACG	1.75	75411	0.0115	2031	1.58
PLBD1-AS1	1.74715	1.58126	1	GCCGAGGCGGGCAGATCACG	1.75	75411	0.0115	2031	1.58
LOC102724657	1.74715	1.58126	1	GCCGAGGCGGGCAGATCACG	1.75	75411	0.0115	2031	1.58
LOC107987006	1.74715	1.58126	1	GCCGAGGCGGGCAGATCACG	1.75	75411	0.0115	2031	1.58
LINC02220	1.74715	1.58126	1	GCCGAGGCGGGCAGATCACG	1.75	75411	0.0115	2031	1.58
SMG1P5	1.74715	1.58126	1	GCCGAGGCGGGCAGATCACG	1.75	75411	0.0115	2031	1.58
LOC107985892	1.74715	1.58126	1	GCCGAGGCGGGCAGATCACG	1.75	75411	0.0115	2031	1.58
FAM212B-AS1	1.74715	1.58126	1	GCCGAGGCGGGCAGATCACG	1.75	75411	0.0115	2031	1.58
LOC105377182	1.74715	1.58126	1	GCCGAGGCGGGCAGATCACG	1.75	75411	0.0115	2031	1.58
LOC105376583	1.74715	1.58126	1	GCCGAGGCGGGCAGATCACG	1.75	75411	0.0115	2031	1.58
LOC105372836	1.74715	1.58126	1	GCCGAGGCGGGCAGATCACG	1.75	75411	0.0115	2031	1.58
LOC105377848	1.74715	1.58126	1	GCCGAGGCGGGCAGATCACG	1.75	75411	0.0115	2031	1.58
LOC101927429	1.74715	1.58126	1	GCCGAGGCGGGCAGATCACG	1.75	75411	0.0115	2031	1.58
LOC101927421	1.74715	1.58126	1	GCCGAGGCGGGCAGATCACG	1.75	75411	0.0115	2031	1.58
LINC02143	1.74715	1.58126	1	GCCGAGGCGGGCAGATCACG	1.75	75411	0.0115	2031	1.58
LINC02147	1.74715	1.58126	1	GCCGAGGCGGGCAGATCACG	1.75	75411	0.0115	2031	1.58
LOC105372266	1.74715	1.58126	1	GCCGAGGCGGGCAGATCACG	1.75	75411	0.0115	2031	1.58
LOC105379252	1.74715	1.58126	1	GCCGAGGCGGGCAGATCACG	1.75	75411	0.0115	2031	1.58
LOC107987084	1.74715	1.58126	1	GCCGAGGCGGGCAGATCACG	1.75	75411	0.0115	2031	1.58
LOC105375147	1.74715	1.58126	1	GCCGAGGCGGGCAGATCACG	1.75	75411	0.0115	2031	1.58
LOC101927914	1.74715	1.58126	1	GCCGAGGCGGGCAGATCACG	1.75	75411	0.0115	2031	1.58
USP12-AS1	1.74715	1.58126	1	GCCGAGGCGGGCAGATCACG	1.75	75411	0.0115	2031	1.58
LOC107986195	1.74715	1.58126	1	GCCGAGGCGGGCAGATCACG	1.75	75411	0.0115	2031	1.58
LOC107986781	1.74715	1.58126	1	GCCGAGGCGGGCAGATCACG	1.75	75411	0.0115	2031	1.58
LOC440434	1.74715	1.58126	1	GCCGAGGCGGGCAGATCACG	1.75	75411	0.0115	2031	1.58
LOC107984756	1.74715	1.58126	1	GCCGAGGCGGGCAGATCACG	1.75	75411	0.0115	2031	1.58
RPS20P2	1.74715	1.58126	1	GCCGAGGCGGGCAGATCACG	1.75	75411	0.0115	2031	1.58
LOC107986837	1.74715	1.58126	1	GCCGAGGCGGGCAGATCACG	1.75	75411	0.0115	2031	1.58
LOC105375345	1.74715	1.58126	1	GCCGAGGCGGGCAGATCACG	1.75	75411	0.0115	2031	1.58
LINC00501	1.74715	1.58126	1	GCCGAGGCGGGCAGATCACG	1.75	75411	0.0115	2031	1.58
LINC01609	1.74715	1.58126	1	GCCGAGGCGGGCAGATCACG	1.75	75411	0.0115	2031	1.58
LOC644249	1.74715	1.58126	1	GCCGAGGCGGGCAGATCACG	1.75	75411	0.0115	2031	1.58
LOC107986760	1.74715	1.58126	1	GCCGAGGCGGGCAGATCACG	1.75	75411	0.0115	2031	1.58
LOC105369898	1.74715	1.58126	1	GCCGAGGCGGGCAGATCACG	1.75	75411	0.0115	2031	1.58
LOC105369896	1.74715	1.58126	1	GCCGAGGCGGGCAGATCACG	1.75	75411	0.0115	2031	1.58
LOC105376632	1.74715	1.58126	1	GCCGAGGCGGGCAGATCACG	1.75	75411	0.0115	2031	1.58
LOC105376634	1.74715	1.58126	1	GCCGAGGCGGGCAGATCACG	1.75	75411	0.0115	2031	1.58
LOC107987068	1.74715	1.58126	1	GCCGAGGCGGGCAGATCACG	1.75	75411	0.0115	2031	1.58
ENPP7P10	1.74715	1.58126	1	GCCGAGGCGGGCAGATCACG	1.75	75411	0.0115	2031	1.58
LOC105375170	1.74715	1.58126	1	GCCGAGGCGGGCAGATCACG	1.75	75411	0.0115	2031	1.58
LINC01036	1.74715	1.58126	1	GCCGAGGCGGGCAGATCACG	1.75	75411	0.0115	2031	1.58
LOC107984844	1.74715	1.58126	1	GCCGAGGCGGGCAGATCACG	1.75	75411	0.0115	2031	1.58
LOC100130256	1.74715	1.58126	1	GCCGAGGCGGGCAGATCACG	1.75	75411	0.0115	2031	1.58
LOC727896	1.74715	1.58126	1	GCCGAGGCGGGCAGATCACG	1.75	75411	0.0115	2031	1.58
LOC107987395	1.74715	1.58126	1	GCCGAGGCGGGCAGATCACG	1.75	75411	0.0115	2031	1.58
MIR217HG	1.74715	1.58126	1	GCCGAGGCGGGCAGATCACG	1.75	75411	0.0115	2031	1.58
LINC02248	1.74715	1.58126	1	GCCGAGGCGGGCAGATCACG	1.75	75411	0.0115	2031	1.58
LOC105377614	1.74715	1.58126	1	GCCGAGGCGGGCAGATCACG	1.75	75411	0.0115	2031	1.58
LOC105377612	1.74715	1.58126	1	GCCGAGGCGGGCAGATCACG	1.75	75411	0.0115	2031	1.58
LOC105377613	1.74715	1.58126	1	GCCGAGGCGGGCAGATCACG	1.75	75411	0.0115	2031	1.58
LOC105370449	1.74715	1.58126	1	GCCGAGGCGGGCAGATCACG	1.75	75411	0.0115	2031	1.58
LINC01687	1.74715	1.58126	1	GCCGAGGCGGGCAGATCACG	1.75	75411	0.0115	2031	1.58
LINC01681	1.74715	1.58126	1	GCCGAGGCGGGCAGATCACG	1.75	75411	0.0115	2031	1.58
LINC02484	1.74715	1.58126	1	GCCGAGGCGGGCAGATCACG	1.75	75411	0.0115	2031	1.58
LOC101928933	1.74715	1.58126	1	GCCGAGGCGGGCAGATCACG	1.75	75411	0.0115	2031	1.58
LOC105370834	1.74715	1.58126	1	GCCGAGGCGGGCAGATCACG	1.75	75411	0.0115	2031	1.58
LOC101929278	1.74715	1.58126	1	GCCGAGGCGGGCAGATCACG	1.75	75411	0.0115	2031	1.58
LINC00345	1.74715	1.58126	1	GCCGAGGCGGGCAGATCACG	1.75	75411	0.0115	2031	1.58
LOC102723364	1.74715	1.58126	1	GCCGAGGCGGGCAGATCACG	1.75	75411	0.0115	2031	1.58
LOC107986537	1.74715	1.58126	1	GCCGAGGCGGGCAGATCACG	1.75	75411	0.0115	2031	1.58
LOC105369998	1.74715	1.58126	1	GCCGAGGCGGGCAGATCACG	1.75	75411	0.0115	2031	1.58
LOC105374002	1.74715	1.58126	1	GCCGAGGCGGGCAGATCACG	1.75	75411	0.0115	2031	1.58
EIF2S2P1	1.74715	1.58126	1	GCCGAGGCGGGCAGATCACG	1.75	75411	0.0115	2031	1.58
LOC101929594	1.74715	1.58126	1	GCCGAGGCGGGCAGATCACG	1.75	75411	0.0115	2031	1.58
LOC100510710	1.74715	1.58126	1	GCCGAGGCGGGCAGATCACG	1.75	75411	0.0115	2031	1.58
LOC105378054	1.74715	1.58126	1	GCCGAGGCGGGCAGATCACG	1.75	75411	0.0115	2031	1.58
LINC01778	1.74715	1.58126	1	GCCGAGGCGGGCAGATCACG	1.75	75411	0.0115	2031	1.58
RBMY2TP	1.74715	1.58126	1	GCCGAGGCGGGCAGATCACG	1.75	75411	0.0115	2031	1.58
LOC105373690	1.74715	1.58126	1	GCCGAGGCGGGCAGATCACG	1.75	75411	0.0115	2031	1.58
LOC100288637	1.74715	1.58126	1	GCCGAGGCGGGCAGATCACG	1.75	75411	0.0115	2031	1.58
LOC101060212	1.74715	1.58126	1	GCCGAGGCGGGCAGATCACG	1.75	75411	0.0115	2031	1.58
LOC105370335	1.74715	1.58126	1	GCCGAGGCGGGCAGATCACG	1.75	75411	0.0115	2031	1.58
LOC105374959	1.74715	1.58126	1	GCCGAGGCGGGCAGATCACG	1.75	75411	0.0115	2031	1.58
LOC102723989	1.74715	1.58126	1	GCCGAGGCGGGCAGATCACG	1.75	75411	0.0115	2031	1.58
LOC100420818	1.74715	1.58126	1	GCCGAGGCGGGCAGATCACG	1.75	75411	0.0115	2031	1.58
PWRN1	1.74715	1.58126	1	GCCGAGGCGGGCAGATCACG	1.75	75411	0.0115	2031	1.58
LOC100996643	1.74715	1.58126	1	GCCGAGGCGGGCAGATCACG	1.75	75411	0.0115	2031	1.58
LOC105377481	1.74715	1.58126	1	GCCGAGGCGGGCAGATCACG	1.75	75411	0.0115	2031	1.58
LOC107984535	1.74715	1.58126	1	GCCGAGGCGGGCAGATCACG	1.75	75411	0.0115	2031	1.58
LOC105374441	1.74715	1.58126	1	GCCGAGGCGGGCAGATCACG	1.75	75411	0.0115	2031	1.58
LOC101930071	1.74715	1.58126	1	GCCGAGGCGGGCAGATCACG	1.75	75411	0.0115	2031	1.58
LOC105369325	1.74715	1.58126	1	GCCGAGGCGGGCAGATCACG	1.75	75411	0.0115	2031	1.58
LOC101929440	1.74715	1.58126	1	GCCGAGGCGGGCAGATCACG	1.75	75411	0.0115	2031	1.58
LINC02130	1.74715	1.58126	1	GCCGAGGCGGGCAGATCACG	1.75	75411	0.0115	2031	1.58
LOC107986929	1.74715	1.58126	1	GCCGAGGCGGGCAGATCACG	1.75	75411	0.0115	2031	1.58
LOC101926886	1.74715	1.58126	1	GCCGAGGCGGGCAGATCACG	1.75	75411	0.0115	2031	1.58
LOC105378492	1.74715	1.58126	1	GCCGAGGCGGGCAGATCACG	1.75	75411	0.0115	2031	1.58
ITFG2-AS1	1.74715	1.58126	1	GCCGAGGCGGGCAGATCACG	1.75	75411	0.0115	2031	1.58
ANKRD36C	1.74715	1.58126	1	GCCGAGGCGGGCAGATCACG	1.75	75411	0.0115	2031	1.58
LOC105370729	1.74715	1.58126	1	GCCGAGGCGGGCAGATCACG	1.75	75411	0.0115	2031	1.58
LOC107984023	1.74715	1.58126	1	GCCGAGGCGGGCAGATCACG	1.75	75411	0.0115	2031	1.58
LOC107984973	1.74715	1.58126	1	GCCGAGGCGGGCAGATCACG	1.75	75411	0.0115	2031	1.58
LOC107985080	1.74715	1.58126	1	GCCGAGGCGGGCAGATCACG	1.75	75411	0.0115	2031	1.58
LINC01349	1.74715	1.58126	1	GCCGAGGCGGGCAGATCACG	1.75	75411	0.0115	2031	1.58
LINC02086	1.74715	1.58126	1	GCCGAGGCGGGCAGATCACG	1.75	75411	0.0115	2031	1.58
LOC105371307	1.74715	1.58126	1	GCCGAGGCGGGCAGATCACG	1.75	75411	0.0115	2031	1.58
LOC105375254	1.74715	1.58126	1	GCCGAGGCGGGCAGATCACG	1.75	75411	0.0115	2031	1.58
AK6P2	1.74715	1.58126	1	GCCGAGGCGGGCAGATCACG	1.75	75411	0.0115	2031	1.58
LOC107985342	1.74715	1.58126	1	GCCGAGGCGGGCAGATCACG	1.75	75411	0.0115	2031	1.58
LOC105378641	1.74715	1.58126	1	GCCGAGGCGGGCAGATCACG	1.75	75411	0.0115	2031	1.58
CASC9	1.74715	1.58126	1	GCCGAGGCGGGCAGATCACG	1.75	75411	0.0115	2031	1.58
LOC107987347	1.74715	1.58126	1	GCCGAGGCGGGCAGATCACG	1.75	75411	0.0115	2031	1.58
LOC105374040	1.74715	1.58126	1	GCCGAGGCGGGCAGATCACG	1.75	75411	0.0115	2031	1.58
LOC101928617	1.74715	1.58126	1	GCCGAGGCGGGCAGATCACG	1.75	75411	0.0115	2031	1.58
SGO1-AS1	1.74715	1.58126	1	GCCGAGGCGGGCAGATCACG	1.75	75411	0.0115	2031	1.58
LOC101928046	1.74715	1.58126	1	GCCGAGGCGGGCAGATCACG	1.75	75411	0.0115	2031	1.58
LOC107987061	1.74715	1.58126	1	GCCGAGGCGGGCAGATCACG	1.75	75411	0.0115	2031	1.58
LOC653786	1.74715	1.58126	1	GCCGAGGCGGGCAGATCACG	1.75	75411	0.0115	2031	1.58
LOC107984608	1.74715	1.58126	1	GCCGAGGCGGGCAGATCACG	1.75	75411	0.0115	2031	1.58
LOC101928942	1.74715	1.58126	1	GCCGAGGCGGGCAGATCACG	1.75	75411	0.0115	2031	1.58
LOC729732	1.74715	1.58126	1	GCCGAGGCGGGCAGATCACG	1.75	75411	0.0115	2031	1.58
ALOX15P1	1.74715	1.58126	1	GCCGAGGCGGGCAGATCACG	1.75	75411	0.0115	2031	1.58
LINC01060	1.74715	1.58126	1	GCCGAGGCGGGCAGATCACG	1.75	75411	0.0115	2031	1.58
LOC105374493	1.74715	1.58126	1	GCCGAGGCGGGCAGATCACG	1.75	75411	0.0115	2031	1.58
LOC107987452	1.74715	1.58126	1	GCCGAGGCGGGCAGATCACG	1.75	75411	0.0115	2031	1.58
LINC01221	1.74715	1.58126	1	GCCGAGGCGGGCAGATCACG	1.75	75411	0.0115	2031	1.58
ENPP7P1	1.74715	1.58126	1	GCCGAGGCGGGCAGATCACG	1.75	75411	0.0115	2031	1.58
ENPP7P6	1.74715	1.58126	1	GCCGAGGCGGGCAGATCACG	1.75	75411	0.0115	2031	1.58
LOC101928696	1.74715	1.58126	1	GCCGAGGCGGGCAGATCACG	1.75	75411	0.0115	2031	1.58
LINC01886	1.74715	1.58126	1	GCCGAGGCGGGCAGATCACG	1.75	75411	0.0115	2031	1.58
LINC01885	1.74715	1.58126	1	GCCGAGGCGGGCAGATCACG	1.75	75411	0.0115	2031	1.58
LOC105378021	1.74715	1.58126	1	GCCGAGGCGGGCAGATCACG	1.75	75411	0.0115	2031	1.58
LOC105370846	1.74715	1.58126	1	GCCGAGGCGGGCAGATCACG	1.75	75411	0.0115	2031	1.58
LOC105372750	1.74715	1.58126	1	GCCGAGGCGGGCAGATCACG	1.75	75411	0.0115	2031	1.58
LOC101927314	1.74715	1.58126	1	GCCGAGGCGGGCAGATCACG	1.75	75411	0.0115	2031	1.58
LINC00582	1.74715	1.58126	1	GCCGAGGCGGGCAGATCACG	1.75	75411	0.0115	2031	1.58
LINC-PINT	1.74715	1.58126	1	GCCGAGGCGGGCAGATCACG	1.75	75411	0.0115	2031	1.58
LOC105371448	1.74715	1.58126	1	GCCGAGGCGGGCAGATCACG	1.75	75411	0.0115	2031	1.58
LOC105376830	1.74715	1.58126	1	GCCGAGGCGGGCAGATCACG	1.75	75411	0.0115	2031	1.58
LOC105375762	1.74715	1.58126	1	GCCGAGGCGGGCAGATCACG	1.75	75411	0.0115	2031	1.58
LOC101927164	1.74715	1.58126	1	GCCGAGGCGGGCAGATCACG	1.75	75411	0.0115	2031	1.58
LOC100506990	1.74715	1.58126	1	GCCGAGGCGGGCAGATCACG	1.75	75411	0.0115	2031	1.58
LOC107984526	1.74715	1.58126	1	GCCGAGGCGGGCAGATCACG	1.75	75411	0.0115	2031	1.58
LOC101928762	1.74715	1.58126	1	GCCGAGGCGGGCAGATCACG	1.75	75411	0.0115	2031	1.58
LOC105374337	1.74715	1.58126	1	GCCGAGGCGGGCAGATCACG	1.75	75411	0.0115	2031	1.58
LOC107986284	1.74715	1.58126	1	GCCGAGGCGGGCAGATCACG	1.75	75411	0.0115	2031	1.58
LOC107986422	1.74715	1.58126	1	GCCGAGGCGGGCAGATCACG	1.75	75411	0.0115	2031	1.58
LINC01102	1.74715	1.58126	1	GCCGAGGCGGGCAGATCACG	1.75	75411	0.0115	2031	1.58
LOC102725082	1.74715	1.58126	1	GCCGAGGCGGGCAGATCACG	1.75	75411	0.0115	2031	1.58
LOC105375878	1.74715	1.58126	1	GCCGAGGCGGGCAGATCACG	1.75	75411	0.0115	2031	1.58
LOC105375879	1.74715	1.58126	1	GCCGAGGCGGGCAGATCACG	1.75	75411	0.0115	2031	1.58
LOC105369876	1.74715	1.58126	1	GCCGAGGCGGGCAGATCACG	1.75	75411	0.0115	2031	1.58
RDH10-AS1	1.74715	1.58126	1	GCCGAGGCGGGCAGATCACG	1.75	75411	0.0115	2031	1.58
MACROD2-IT1	1.74715	1.58126	1	GCCGAGGCGGGCAGATCACG	1.75	75411	0.0115	2031	1.58
LOC107987109	1.74715	1.58126	1	GCCGAGGCGGGCAGATCACG	1.75	75411	0.0115	2031	1.58
LOC107986993	1.74715	1.58126	1	GCCGAGGCGGGCAGATCACG	1.75	75411	0.0115	2031	1.58
LOC105374758	1.74715	1.58126	1	GCCGAGGCGGGCAGATCACG	1.75	75411	0.0115	2031	1.58
LOC107985976	1.74715	1.58126	1	GCCGAGGCGGGCAGATCACG	1.75	75411	0.0115	2031	1.58
LOC105374513	1.74715	1.58126	1	GCCGAGGCGGGCAGATCACG	1.75	75411	0.0115	2031	1.58
LOC646797	1.74715	1.58126	1	GCCGAGGCGGGCAGATCACG	1.75	75411	0.0115	2031	1.58
LOC101929256	1.74715	1.58126	1	GCCGAGGCGGGCAGATCACG	1.75	75411	0.0115	2031	1.58
LOC102723795	1.74715	1.58126	1	GCCGAGGCGGGCAGATCACG	1.75	75411	0.0115	2031	1.58
LOC105370658	1.74715	1.58126	1	GCCGAGGCGGGCAGATCACG	1.75	75411	0.0115	2031	1.58
LOC105370651	1.74715	1.58126	1	GCCGAGGCGGGCAGATCACG	1.75	75411	0.0115	2031	1.58
LOC105379442	1.74715	1.58126	1	GCCGAGGCGGGCAGATCACG	1.75	75411	0.0115	2031	1.58
PSPHP1	1.74715	1.58126	1	GCCGAGGCGGGCAGATCACG	1.75	75411	0.0115	2031	1.58
LOC105378228	1.74715	1.58126	1	GCCGAGGCGGGCAGATCACG	1.75	75411	0.0115	2031	1.58
LOC728755	1.74715	1.58126	1	GCCGAGGCGGGCAGATCACG	1.75	75411	0.0115	2031	1.58
UNQ6494	1.74715	1.58126	1	GCCGAGGCGGGCAGATCACG	1.75	75411	0.0115	2031	1.58
LOC105371356	1.74715	1.58126	1	GCCGAGGCGGGCAGATCACG	1.75	75411	0.0115	2031	1.58
LOC105378209	1.74715	1.58126	1	GCCGAGGCGGGCAGATCACG	1.75	75411	0.0115	2031	1.58
LOC101929497	1.74715	1.58126	1	GCCGAGGCGGGCAGATCACG	1.75	75411	0.0115	2031	1.58
RPL32P17	1.74715	1.58126	1	GCCGAGGCGGGCAGATCACG	1.75	75411	0.0115	2031	1.58
LOC105376751	1.74715	1.58126	1	GCCGAGGCGGGCAGATCACG	1.75	75411	0.0115	2031	1.58
ESPNP	1.74715	1.58126	1	GCCGAGGCGGGCAGATCACG	1.75	75411	0.0115	2031	1.58
LOC105373069	1.74715	1.58126	1	GCCGAGGCGGGCAGATCACG	1.75	75411	0.0115	2031	1.58
LOC105373068	1.74715	1.58126	1	GCCGAGGCGGGCAGATCACG	1.75	75411	0.0115	2031	1.58
LOC105372160	1.74715	1.58126	1	GCCGAGGCGGGCAGATCACG	1.75	75411	0.0115	2031	1.58
LOC105372169	1.74715	1.58126	1	GCCGAGGCGGGCAGATCACG	1.75	75411	0.0115	2031	1.58
LOC102723963	1.74715	1.58126	1	GCCGAGGCGGGCAGATCACG	1.75	75411	0.0115	2031	1.58
LOC283038	1.74715	1.58126	1	GCCGAGGCGGGCAGATCACG	1.75	75411	0.0115	2031	1.58
LOC107986053	1.74715	1.58126	1	GCCGAGGCGGGCAGATCACG	1.75	75411	0.0115	2031	1.58
DSCR9	1.74715	1.58126	1	GCCGAGGCGGGCAGATCACG	1.75	75411	0.0115	2031	1.58
LOC105371370	1.74715	1.58126	1	GCCGAGGCGGGCAGATCACG	1.75	75411	0.0115	2031	1.58
LINC01505	1.74715	1.58126	1	GCCGAGGCGGGCAGATCACG	1.75	75411	0.0115	2031	1.58
LOC105376335	1.74715	1.58126	1	GCCGAGGCGGGCAGATCACG	1.75	75411	0.0115	2031	1.58
LINC01508	1.74715	1.58126	1	GCCGAGGCGGGCAGATCACG	1.75	75411	0.0115	2031	1.58
MIATNB	1.74715	1.58126	1	GCCGAGGCGGGCAGATCACG	1.75	75411	0.0115	2031	1.58
LOC107987440	1.74715	1.58126	1	GCCGAGGCGGGCAGATCACG	1.75	75411	0.0115	2031	1.58
LOC105377858	1.74715	1.58126	1	GCCGAGGCGGGCAGATCACG	1.75	75411	0.0115	2031	1.58
LOC105373195	1.74715	1.58126	1	GCCGAGGCGGGCAGATCACG	1.75	75411	0.0115	2031	1.58
LOC107984575	1.74715	1.58126	1	GCCGAGGCGGGCAGATCACG	1.75	75411	0.0115	2031	1.58
LOC101928443	1.74715	1.58126	1	GCCGAGGCGGGCAGATCACG	1.75	75411	0.0115	2031	1.58
LOC105371612	1.74715	1.58126	1	GCCGAGGCGGGCAGATCACG	1.75	75411	0.0115	2031	1.58
LOC105371786	1.74715	1.58126	1	GCCGAGGCGGGCAGATCACG	1.75	75411	0.0115	2031	1.58
LOC105376076	1.74715	1.58126	1	GCCGAGGCGGGCAGATCACG	1.75	75411	0.0115	2031	1.58
ANKRD44-IT1	1.74715	1.58126	1	GCCGAGGCGGGCAGATCACG	1.75	75411	0.0115	2031	1.58
LOC105379880	1.74715	1.58126	1	GCCGAGGCGGGCAGATCACG	1.75	75411	0.0115	2031	1.58
LOC105370740	1.74715	1.58126	1	GCCGAGGCGGGCAGATCACG	1.75	75411	0.0115	2031	1.58
LOC105372424	1.74715	1.58126	1	GCCGAGGCGGGCAGATCACG	1.75	75411	0.0115	2031	1.58
LOC105374114	1.74715	1.58126	1	GCCGAGGCGGGCAGATCACG	1.75	75411	0.0115	2031	1.58
LOC101928381	1.74715	1.58126	1	GCCGAGGCGGGCAGATCACG	1.75	75411	0.0115	2031	1.58
DPH6-AS1	1.74715	1.58126	1	GCCGAGGCGGGCAGATCACG	1.75	75411	0.0115	2031	1.58
LINC00670	1.74715	1.58126	1	GCCGAGGCGGGCAGATCACG	1.75	75411	0.0115	2031	1.58
COL1A2-AS1	1.74715	1.58126	1	GCCGAGGCGGGCAGATCACG	1.75	75411	0.0115	2031	1.58
LOC105379185	1.74715	1.58126	1	GCCGAGGCGGGCAGATCACG	1.75	75411	0.0115	2031	1.58
LINC01877	1.74715	1.58126	1	GCCGAGGCGGGCAGATCACG	1.75	75411	0.0115	2031	1.58
LOC105377706	1.74715	1.58126	1	GCCGAGGCGGGCAGATCACG	1.75	75411	0.0115	2031	1.58
LOC105377700	1.74715	1.58126	1	GCCGAGGCGGGCAGATCACG	1.75	75411	0.0115	2031	1.58
LINC01461	1.74715	1.58126	1	GCCGAGGCGGGCAGATCACG	1.75	75411	0.0115	2031	1.58
LOC105375674	1.74715	1.58126	1	GCCGAGGCGGGCAGATCACG	1.75	75411	0.0115	2031	1.58
LINC02161	1.74715	1.58126	1	GCCGAGGCGGGCAGATCACG	1.75	75411	0.0115	2031	1.58
LOC100506047	1.74715	1.58126	1	GCCGAGGCGGGCAGATCACG	1.75	75411	0.0115	2031	1.58
LOC105372942	1.74715	1.58126	1	GCCGAGGCGGGCAGATCACG	1.75	75411	0.0115	2031	1.58
LINC02294	1.74715	1.58126	1	GCCGAGGCGGGCAGATCACG	1.75	75411	0.0115	2031	1.58
LOC105369536	1.74715	1.58126	1	GCCGAGGCGGGCAGATCACG	1.75	75411	0.0115	2031	1.58
FGF7P3	1.74715	1.58126	1	GCCGAGGCGGGCAGATCACG	1.75	75411	0.0115	2031	1.58
FGF7P6	1.74715	1.58126	1	GCCGAGGCGGGCAGATCACG	1.75	75411	0.0115	2031	1.58
ELOA-AS1	1.74715	1.58126	1	GCCGAGGCGGGCAGATCACG	1.75	75411	0.0115	2031	1.58
LOC107986494	1.74715	1.58126	1	GCCGAGGCGGGCAGATCACG	1.75	75411	0.0115	2031	1.58
LOC105372358	1.74715	1.58126	1	GCCGAGGCGGGCAGATCACG	1.75	75411	0.0115	2031	1.58
LINC01612	1.74715	1.58126	1	GCCGAGGCGGGCAGATCACG	1.75	75411	0.0115	2031	1.58
LOC105374333	1.74715	1.58126	1	GCCGAGGCGGGCAGATCACG	1.75	75411	0.0115	2031	1.58
LOC105373643	1.74715	1.58126	1	GCCGAGGCGGGCAGATCACG	1.75	75411	0.0115	2031	1.58
LOC105378476	1.74715	1.58126	1	GCCGAGGCGGGCAGATCACG	1.75	75411	0.0115	2031	1.58
LOC100422106	1.74715	1.58126	1	GCCGAGGCGGGCAGATCACG	1.75	75411	0.0115	2031	1.58
LOC643201	1.74715	1.58126	1	GCCGAGGCGGGCAGATCACG	1.75	75411	0.0115	2031	1.58
LINC01945	1.74715	1.58126	1	GCCGAGGCGGGCAGATCACG	1.75	75411	0.0115	2031	1.58
LOC107987178	1.74715	1.58126	1	GCCGAGGCGGGCAGATCACG	1.75	75411	0.0115	2031	1.58
GBAP1	1.74715	1.58126	1	GCCGAGGCGGGCAGATCACG	1.75	75411	0.0115	2031	1.58
LOC105375164	1.74715	1.58126	1	GCCGAGGCGGGCAGATCACG	1.75	75411	0.0115	2031	1.58
LOC105372677	1.74715	1.58126	1	GCCGAGGCGGGCAGATCACG	1.75	75411	0.0115	2031	1.58
LOC100288379	1.74715	1.58126	1	GCCGAGGCGGGCAGATCACG	1.75	75411	0.0115	2031	1.58
LOC101927189	1.74715	1.58126	1	GCCGAGGCGGGCAGATCACG	1.75	75411	0.0115	2031	1.58
LOC105371095	1.74715	1.58126	1	GCCGAGGCGGGCAGATCACG	1.75	75411	0.0115	2031	1.58
LOC105371097	1.74715	1.58126	1	GCCGAGGCGGGCAGATCACG	1.75	75411	0.0115	2031	1.58
LOC101929750	1.74715	1.58126	1	GCCGAGGCGGGCAGATCACG	1.75	75411	0.0115	2031	1.58
LOC105371509	1.74715	1.58126	1	GCCGAGGCGGGCAGATCACG	1.75	75411	0.0115	2031	1.58
LOC101929950	1.74715	1.58126	1	GCCGAGGCGGGCAGATCACG	1.75	75411	0.0115	2031	1.58
LOC107986314	1.74715	1.58126	1	GCCGAGGCGGGCAGATCACG	1.75	75411	0.0115	2031	1.58
LOC107984465	1.74715	1.58126	1	GCCGAGGCGGGCAGATCACG	1.75	75411	0.0115	2031	1.58
LOC107985738	1.74715	1.58126	1	GCCGAGGCGGGCAGATCACG	1.75	75411	0.0115	2031	1.58
LOC105376246	1.74715	1.58126	1	GCCGAGGCGGGCAGATCACG	1.75	75411	0.0115	2031	1.58
LOC105371623	1.74715	1.58126	1	GCCGAGGCGGGCAGATCACG	1.75	75411	0.0115	2031	1.58
LOC105374660	1.74715	1.58126	1	GCCGAGGCGGGCAGATCACG	1.75	75411	0.0115	2031	1.58
LOC105379297	1.74715	1.58126	1	GCCGAGGCGGGCAGATCACG	1.75	75411	0.0115	2031	1.58
LOC102724618	1.74715	1.58126	1	GCCGAGGCGGGCAGATCACG	1.75	75411	0.0115	2031	1.58
LOC105377923	1.74715	1.58126	1	GCCGAGGCGGGCAGATCACG	1.75	75411	0.0115	2031	1.58
EMC3-AS1	1.74715	1.58126	1	GCCGAGGCGGGCAGATCACG	1.75	75411	0.0115	2031	1.58
LOC107985538	1.74715	1.58126	1	GCCGAGGCGGGCAGATCACG	1.75	75411	0.0115	2031	1.58
LOC100507487	1.74715	1.58126	1	GCCGAGGCGGGCAGATCACG	1.75	75411	0.0115	2031	1.58
ELMO2P1	1.74715	1.58126	1	GCCGAGGCGGGCAGATCACG	1.75	75411	0.0115	2031	1.58
LOC101060091	1.74715	1.58126	1	GCCGAGGCGGGCAGATCACG	1.75	75411	0.0115	2031	1.58
BRCAT54	1.74715	1.58126	1	GCCGAGGCGGGCAGATCACG	1.75	75411	0.0115	2031	1.58
LOC105374252	1.74715	1.58126	1	GCCGAGGCGGGCAGATCACG	1.75	75411	0.0115	2031	1.58
LOC105378531	1.74715	1.58126	1	GCCGAGGCGGGCAGATCACG	1.75	75411	0.0115	2031	1.58
LOC102724548	1.74715	1.58126	1	GCCGAGGCGGGCAGATCACG	1.75	75411	0.0115	2031	1.58
FAM85B	1.74715	1.58126	1	GCCGAGGCGGGCAGATCACG	1.75	75411	0.0115	2031	1.58
SMA4	1.74715	1.58126	1	GCCGAGGCGGGCAGATCACG	1.75	75411	0.0115	2031	1.58
LINC00598	1.74715	1.58126	1	GCCGAGGCGGGCAGATCACG	1.75	75411	0.0115	2031	1.58
LOC102723763	1.74715	1.58126	1	GCCGAGGCGGGCAGATCACG	1.75	75411	0.0115	2031	1.58
LOC105374359	1.74715	1.58126	1	GCCGAGGCGGGCAGATCACG	1.75	75411	0.0115	2031	1.58
LOC105371209	1.74715	1.58126	1	GCCGAGGCGGGCAGATCACG	1.75	75411	0.0115	2031	1.58
LOC107986021	1.74715	1.58126	1	GCCGAGGCGGGCAGATCACG	1.75	75411	0.0115	2031	1.58
RMST	1.74715	1.58126	1	GCCGAGGCGGGCAGATCACG	1.75	75411	0.0115	2031	1.58
LOC100420821	1.74715	1.58126	1	GCCGAGGCGGGCAGATCACG	1.75	75411	0.0115	2031	1.58
CROCCP3	1.74715	1.58126	1	GCCGAGGCGGGCAGATCACG	1.75	75411	0.0115	2031	1.58
LINC01558	1.74715	1.58126	1	GCCGAGGCGGGCAGATCACG	1.75	75411	0.0115	2031	1.58
LINC00609	1.74715	1.58126	1	GCCGAGGCGGGCAGATCACG	1.75	75411	0.0115	2031	1.58
LOC102723878	1.74715	1.58126	1	GCCGAGGCGGGCAGATCACG	1.75	75411	0.0115	2031	1.58
PRSS43	1.74715	1.58126	1	GCCGAGGCGGGCAGATCACG	1.75	75411	0.0115	2031	1.58
TPTE2P3	1.74715	1.58126	1	GCCGAGGCGGGCAGATCACG	1.75	75411	0.0115	2031	1.58
GPR1-AS	1.74715	1.58126	1	GCCGAGGCGGGCAGATCACG	1.75	75411	0.0115	2031	1.58
LINC00882	1.74715	1.58126	1	GCCGAGGCGGGCAGATCACG	1.75	75411	0.0115	2031	1.58
LOC105371757	1.74715	1.58126	1	GCCGAGGCGGGCAGATCACG	1.75	75411	0.0115	2031	1.58
LOC105371754	1.74715	1.58126	1	GCCGAGGCGGGCAGATCACG	1.75	75411	0.0115	2031	1.58
LINC01473	1.74715	1.58126	1	GCCGAGGCGGGCAGATCACG	1.75	75411	0.0115	2031	1.58
LOC107984277	1.74715	1.58126	1	GCCGAGGCGGGCAGATCACG	1.75	75411	0.0115	2031	1.58
LOC101926892	1.74715	1.58126	1	GCCGAGGCGGGCAGATCACG	1.75	75411	0.0115	2031	1.58
LINC00922	1.74715	1.58126	1	GCCGAGGCGGGCAGATCACG	1.75	75411	0.0115	2031	1.58
LINC01646	1.74715	1.58126	1	GCCGAGGCGGGCAGATCACG	1.75	75411	0.0115	2031	1.58
LOC105369850	1.74715	1.58126	1	GCCGAGGCGGGCAGATCACG	1.75	75411	0.0115	2031	1.58
LOC402096	1.74715	1.58126	1	GCCGAGGCGGGCAGATCACG	1.75	75411	0.0115	2031	1.58
LOC105378286	1.74715	1.58126	1	GCCGAGGCGGGCAGATCACG	1.75	75411	0.0115	2031	1.58
LOC107987127	1.74715	1.58126	1	GCCGAGGCGGGCAGATCACG	1.75	75411	0.0115	2031	1.58
LINC01902	1.74715	1.58126	1	GCCGAGGCGGGCAGATCACG	1.75	75411	0.0115	2031	1.58
LOC102723566	1.74715	1.58126	1	GCCGAGGCGGGCAGATCACG	1.75	75411	0.0115	2031	1.58
LOC101928849	1.74715	1.58126	1	GCCGAGGCGGGCAGATCACG	1.75	75411	0.0115	2031	1.58
LOC105374777	1.74715	1.58126	1	GCCGAGGCGGGCAGATCACG	1.75	75411	0.0115	2031	1.58
LOC105369958	1.74715	1.58126	1	GCCGAGGCGGGCAGATCACG	1.75	75411	0.0115	2031	1.58
LOC105378671	1.74715	1.58126	1	GCCGAGGCGGGCAGATCACG	1.75	75411	0.0115	2031	1.58
LOC107986157	1.74715	1.58126	1	GCCGAGGCGGGCAGATCACG	1.75	75411	0.0115	2031	1.58
LOC107986489	1.74715	1.58126	1	GCCGAGGCGGGCAGATCACG	1.75	75411	0.0115	2031	1.58
ACTG1P17	1.74715	1.58126	1	GCCGAGGCGGGCAGATCACG	1.75	75411	0.0115	2031	1.58
LOC105372066	1.74715	1.58126	1	GCCGAGGCGGGCAGATCACG	1.75	75411	0.0115	2031	1.58
LOC105374898	1.74715	1.58126	1	GCCGAGGCGGGCAGATCACG	1.75	75411	0.0115	2031	1.58
LOC105373819	1.74715	1.58126	1	GCCGAGGCGGGCAGATCACG	1.75	75411	0.0115	2031	1.58
LOC101927502	1.74715	1.58126	1	GCCGAGGCGGGCAGATCACG	1.75	75411	0.0115	2031	1.58
LOC105369566	1.74715	1.58126	1	GCCGAGGCGGGCAGATCACG	1.75	75411	0.0115	2031	1.58
LOC390877	1.74715	1.58126	1	GCCGAGGCGGGCAGATCACG	1.75	75411	0.0115	2031	1.58
HECW1-IT1	1.74715	1.58126	1	GCCGAGGCGGGCAGATCACG	1.75	75411	0.0115	2031	1.58
LOC105377564	1.74715	1.58126	1	GCCGAGGCGGGCAGATCACG	1.75	75411	0.0115	2031	1.58
LOC105376219	1.74715	1.58126	1	GCCGAGGCGGGCAGATCACG	1.75	75411	0.0115	2031	1.58
BCAR4	1.74715	1.58126	1	GCCGAGGCGGGCAGATCACG	1.75	75411	0.0115	2031	1.58
LOC102724081	1.74715	1.58126	1	GCCGAGGCGGGCAGATCACG	1.75	75411	0.0115	2031	1.58
LOC105369762	1.74715	1.58126	1	GCCGAGGCGGGCAGATCACG	1.75	75411	0.0115	2031	1.58
LOC105369760	1.74715	1.58126	1	GCCGAGGCGGGCAGATCACG	1.75	75411	0.0115	2031	1.58
LOC105379618	1.74715	1.58126	1	GCCGAGGCGGGCAGATCACG	1.75	75411	0.0115	2031	1.58
LINC00301	1.74715	1.58126	1	GCCGAGGCGGGCAGATCACG	1.75	75411	0.0115	2031	1.58
LOC105373283	1.74715	1.58126	1	GCCGAGGCGGGCAGATCACG	1.75	75411	0.0115	2031	1.58
LOC107987443	1.74715	1.58126	1	GCCGAGGCGGGCAGATCACG	1.75	75411	0.0115	2031	1.58
CTC-338M12.4	1.74715	1.58126	1	GCCGAGGCGGGCAGATCACG	1.75	75411	0.0115	2031	1.58
LINC01890	1.74715	1.58126	1	GCCGAGGCGGGCAGATCACG	1.75	75411	0.0115	2031	1.58
LOC105374813	1.74715	1.58126	1	GCCGAGGCGGGCAGATCACG	1.75	75411	0.0115	2031	1.58
LOC102724832	1.74715	1.58126	1	GCCGAGGCGGGCAGATCACG	1.75	75411	0.0115	2031	1.58
LOC105374033	1.74715	1.58126	1	GCCGAGGCGGGCAGATCACG	1.75	75411	0.0115	2031	1.58
PTPRVP	1.74715	1.58126	1	GCCGAGGCGGGCAGATCACG	1.75	75411	0.0115	2031	1.58
LOC107985767	1.74715	1.58126	1	GCCGAGGCGGGCAGATCACG	1.75	75411	0.0115	2031	1.58
LOC105371459	1.74715	1.58126	1	GCCGAGGCGGGCAGATCACG	1.75	75411	0.0115	2031	1.58
LOC107985568	1.74715	1.58126	1	GCCGAGGCGGGCAGATCACG	1.75	75411	0.0115	2031	1.58
LOC105375228	1.74715	1.58126	1	GCCGAGGCGGGCAGATCACG	1.75	75411	0.0115	2031	1.58
LOC101927018	1.74715	1.58126	1	GCCGAGGCGGGCAGATCACG	1.75	75411	0.0115	2031	1.58
MACROD2-AS1	1.74715	1.58126	1	GCCGAGGCGGGCAGATCACG	1.75	75411	0.0115	2031	1.58
LOC105375759	1.74715	1.58126	1	GCCGAGGCGGGCAGATCACG	1.75	75411	0.0115	2031	1.58
LOC101927179	1.74715	1.58126	1	GCCGAGGCGGGCAGATCACG	1.75	75411	0.0115	2031	1.58
LOC105372804	1.74715	1.58126	1	GCCGAGGCGGGCAGATCACG	1.75	75411	0.0115	2031	1.58
LOC105372809	1.74715	1.58126	1	GCCGAGGCGGGCAGATCACG	1.75	75411	0.0115	2031	1.58
LOC107986579	1.74715	1.58126	1	GCCGAGGCGGGCAGATCACG	1.75	75411	0.0115	2031	1.58
LOC107983974	1.74715	1.58126	1	GCCGAGGCGGGCAGATCACG	1.75	75411	0.0115	2031	1.58
LINC00467	1.74715	1.58126	1	GCCGAGGCGGGCAGATCACG	1.75	75411	0.0115	2031	1.58
LINC00461	1.74715	1.58126	1	GCCGAGGCGGGCAGATCACG	1.75	75411	0.0115	2031	1.58
PPP4R1L	1.74715	1.58126	1	GCCGAGGCGGGCAGATCACG	1.75	75411	0.0115	2031	1.58
LINC01133	1.74715	1.58126	1	GCCGAGGCGGGCAGATCACG	1.75	75411	0.0115	2031	1.58
HCG17	1.74715	1.58126	1	GCCGAGGCGGGCAGATCACG	1.75	75411	0.0115	2031	1.58
LOC107985000	1.74715	1.58126	1	GCCGAGGCGGGCAGATCACG	1.75	75411	0.0115	2031	1.58
IGF2BP2-AS1	1.74715	1.58126	1	GCCGAGGCGGGCAGATCACG	1.75	75411	0.0115	2031	1.58
LINC02327	1.74715	1.58126	1	GCCGAGGCGGGCAGATCACG	1.75	75411	0.0115	2031	1.58
LINC02323	1.74715	1.58126	1	GCCGAGGCGGGCAGATCACG	1.75	75411	0.0115	2031	1.58
LINC02328	1.74715	1.58126	1	GCCGAGGCGGGCAGATCACG	1.75	75411	0.0115	2031	1.58
LOC105372407	1.74715	1.58126	1	GCCGAGGCGGGCAGATCACG	1.75	75411	0.0115	2031	1.58
LOC101927042	1.74715	1.58126	1	GCCGAGGCGGGCAGATCACG	1.75	75411	0.0115	2031	1.58
LOC107985824	1.74715	1.58126	1	GCCGAGGCGGGCAGATCACG	1.75	75411	0.0115	2031	1.58
BEAN1-AS1	1.74715	1.58126	1	GCCGAGGCGGGCAGATCACG	1.75	75411	0.0115	2031	1.58
LOC107984390	1.74715	1.58126	1	GCCGAGGCGGGCAGATCACG	1.75	75411	0.0115	2031	1.58
LOC105370991	1.74715	1.58126	1	GCCGAGGCGGGCAGATCACG	1.75	75411	0.0115	2031	1.58
LOC105376640	1.74715	1.58126	1	GCCGAGGCGGGCAGATCACG	1.75	75411	0.0115	2031	1.58
LOC105379167	1.74715	1.58126	1	GCCGAGGCGGGCAGATCACG	1.75	75411	0.0115	2031	1.58
LOC102724745	1.74715	1.58126	1	GCCGAGGCGGGCAGATCACG	1.75	75411	0.0115	2031	1.58
LINC02515	1.74715	1.58126	1	GCCGAGGCGGGCAGATCACG	1.75	75411	0.0115	2031	1.58
LOC105375492	1.74715	1.58126	1	GCCGAGGCGGGCAGATCACG	1.75	75411	0.0115	2031	1.58
LOC107986984	1.74715	1.58126	1	GCCGAGGCGGGCAGATCACG	1.75	75411	0.0115	2031	1.58
LOC101929400	1.74715	1.58126	1	GCCGAGGCGGGCAGATCACG	1.75	75411	0.0115	2031	1.58
LOC105371729	1.74715	1.58126	1	GCCGAGGCGGGCAGATCACG	1.75	75411	0.0115	2031	1.58
CNTN4-AS2	1.74715	1.58126	1	GCCGAGGCGGGCAGATCACG	1.75	75411	0.0115	2031	1.58
PAXBP1-AS1	1.74715	1.58126	1	GCCGAGGCGGGCAGATCACG	1.75	75411	0.0115	2031	1.58
LOC105372962	1.74715	1.58126	1	GCCGAGGCGGGCAGATCACG	1.75	75411	0.0115	2031	1.58
LOC107984132	1.74715	1.58126	1	GCCGAGGCGGGCAGATCACG	1.75	75411	0.0115	2031	1.58
LRRC53	1.74715	1.58126	1	GCCGAGGCGGGCAGATCACG	1.75	75411	0.0115	2031	1.58
LOC107986821	1.74715	1.58126	1	GCCGAGGCGGGCAGATCACG	1.75	75411	0.0115	2031	1.58
SMIM31	1.74715	1.58126	1	GCCGAGGCGGGCAGATCACG	1.75	75411	0.0115	2031	1.58
LOC105379829	1.74715	1.58126	1	GCCGAGGCGGGCAGATCACG	1.75	75411	0.0115	2031	1.58
LINC01088	1.74715	1.58126	1	GCCGAGGCGGGCAGATCACG	1.75	75411	0.0115	2031	1.58
LOC105372483	1.74715	1.58126	1	GCCGAGGCGGGCAGATCACG	1.75	75411	0.0115	2031	1.58
LOC105371684	1.74715	1.58126	1	GCCGAGGCGGGCAGATCACG	1.75	75411	0.0115	2031	1.58
LOC102724058	1.74715	1.58126	1	GCCGAGGCGGGCAGATCACG	1.75	75411	0.0115	2031	1.58
LOC102724057	1.74715	1.58126	1	GCCGAGGCGGGCAGATCACG	1.75	75411	0.0115	2031	1.58
LOC105370222	1.74715	1.58126	1	GCCGAGGCGGGCAGATCACG	1.75	75411	0.0115	2031	1.58
LOC105377941	1.74715	1.58126	1	GCCGAGGCGGGCAGATCACG	1.75	75411	0.0115	2031	1.58
LOC107986771	1.74715	1.58126	1	GCCGAGGCGGGCAGATCACG	1.75	75411	0.0115	2031	1.58
LOC107986770	1.74715	1.58126	1	GCCGAGGCGGGCAGATCACG	1.75	75411	0.0115	2031	1.58
DDX11-AS1	1.74715	1.58126	1	GCCGAGGCGGGCAGATCACG	1.75	75411	0.0115	2031	1.58
FAM92A1P2	1.74715	1.58126	1	GCCGAGGCGGGCAGATCACG	1.75	75411	0.0115	2031	1.58
LOC107985641	1.74715	1.58126	1	GCCGAGGCGGGCAGATCACG	1.75	75411	0.0115	2031	1.58
LOC105375149	1.74715	1.58126	1	GCCGAGGCGGGCAGATCACG	1.75	75411	0.0115	2031	1.58
LOC101929485	1.74715	1.58126	1	GCCGAGGCGGGCAGATCACG	1.75	75411	0.0115	2031	1.58
LOC101927476	1.74715	1.58126	1	GCCGAGGCGGGCAGATCACG	1.75	75411	0.0115	2031	1.58
PI4KAP1	1.74715	1.58126	1	GCCGAGGCGGGCAGATCACG	1.75	75411	0.0115	2031	1.58
PI4KAP2	1.74715	1.58126	1	GCCGAGGCGGGCAGATCACG	1.75	75411	0.0115	2031	1.58
LOC100420928	1.74715	1.58126	1	GCCGAGGCGGGCAGATCACG	1.75	75411	0.0115	2031	1.58
ADAMTS9-AS2	1.74715	1.58126	1	GCCGAGGCGGGCAGATCACG	1.75	75411	0.0115	2031	1.58
PDCD6IPP2	1.74715	1.58126	1	GCCGAGGCGGGCAGATCACG	1.75	75411	0.0115	2031	1.58
LINC02498	1.74715	1.58126	1	GCCGAGGCGGGCAGATCACG	1.75	75411	0.0115	2031	1.58
LOC105378760	1.74715	1.58126	1	GCCGAGGCGGGCAGATCACG	1.75	75411	0.0115	2031	1.58
LOC105370763	1.74715	1.58126	1	GCCGAGGCGGGCAGATCACG	1.75	75411	0.0115	2031	1.58
GS1-594A7.3	1.74715	1.58126	1	GCCGAGGCGGGCAGATCACG	1.75	75411	0.0115	2031	1.58
LOC102723427	1.74715	1.58126	1	GCCGAGGCGGGCAGATCACG	1.75	75411	0.0115	2031	1.58
SLC2A1-AS1	1.74715	1.58126	1	GCCGAGGCGGGCAGATCACG	1.75	75411	0.0115	2031	1.58
FAM95B1	1.74715	1.58126	1	GCCGAGGCGGGCAGATCACG	1.75	75411	0.0115	2031	1.58
LINC02047	1.74715	1.58126	1	GCCGAGGCGGGCAGATCACG	1.75	75411	0.0115	2031	1.58
LOC105372564	1.74715	1.58126	1	GCCGAGGCGGGCAGATCACG	1.75	75411	0.0115	2031	1.58
LOC105375723	1.74715	1.58126	1	GCCGAGGCGGGCAGATCACG	1.75	75411	0.0115	2031	1.58
LOC105377867	1.74715	1.58126	1	GCCGAGGCGGGCAGATCACG	1.75	75411	0.0115	2031	1.58
LOC105369454	1.74715	1.58126	1	GCCGAGGCGGGCAGATCACG	1.75	75411	0.0115	2031	1.58
LOC105378065	1.74715	1.58126	1	GCCGAGGCGGGCAGATCACG	1.75	75411	0.0115	2031	1.58
LOC105378658	1.74715	1.58126	1	GCCGAGGCGGGCAGATCACG	1.75	75411	0.0115	2031	1.58
LOC105375686	1.74715	1.58126	1	GCCGAGGCGGGCAGATCACG	1.75	75411	0.0115	2031	1.58
LOC105375683	1.74715	1.58126	1	GCCGAGGCGGGCAGATCACG	1.75	75411	0.0115	2031	1.58
LOC401478	1.74715	1.58126	1	GCCGAGGCGGGCAGATCACG	1.75	75411	0.0115	2031	1.58
ZBTB46-AS1	1.74715	1.58126	1	GCCGAGGCGGGCAGATCACG	1.75	75411	0.0115	2031	1.58
LOC107986002	1.74715	1.58126	1	GCCGAGGCGGGCAGATCACG	1.75	75411	0.0115	2031	1.58
LOC105370492	1.74715	1.58126	1	GCCGAGGCGGGCAGATCACG	1.75	75411	0.0115	2031	1.58
RBFADN	1.74715	1.58126	1	GCCGAGGCGGGCAGATCACG	1.75	75411	0.0115	2031	1.58
LOC107984097	1.74715	1.58126	1	GCCGAGGCGGGCAGATCACG	1.75	75411	0.0115	2031	1.58
LOC105369165	1.74715	1.58126	1	GCCGAGGCGGGCAGATCACG	1.75	75411	0.0115	2031	1.58
TTC28-AS1	1.74715	1.58126	1	GCCGAGGCGGGCAGATCACG	1.75	75411	0.0115	2031	1.58
LOC105374455	1.74715	1.58126	1	GCCGAGGCGGGCAGATCACG	1.75	75411	0.0115	2031	1.58
LOC107987278	1.74715	1.58126	1	GCCGAGGCGGGCAGATCACG	1.75	75411	0.0115	2031	1.58
LOC105375441	1.74715	1.58126	1	GCCGAGGCGGGCAGATCACG	1.75	75411	0.0115	2031	1.58
LINC01476	1.74715	1.58126	1	GCCGAGGCGGGCAGATCACG	1.75	75411	0.0115	2031	1.58
LINC01471	1.74715	1.58126	1	GCCGAGGCGGGCAGATCACG	1.75	75411	0.0115	2031	1.58
LINC01470	1.74715	1.58126	1	GCCGAGGCGGGCAGATCACG	1.75	75411	0.0115	2031	1.58
LINC01788	1.74715	1.58126	1	GCCGAGGCGGGCAGATCACG	1.75	75411	0.0115	2031	1.58
SGO1	1.74715	1.58126	1	GCCGAGGCGGGCAGATCACG	1.75	75411	0.0115	2031	1.58
LOC105373605	1.74715	1.58126	1	GCCGAGGCGGGCAGATCACG	1.75	75411	0.0115	2031	1.58
LOC107984736	1.74715	1.58126	1	GCCGAGGCGGGCAGATCACG	1.75	75411	0.0115	2031	1.58
LOC105376513	1.74715	1.58126	1	GCCGAGGCGGGCAGATCACG	1.75	75411	0.0115	2031	1.58
C5orf17	1.74715	1.58126	1	GCCGAGGCGGGCAGATCACG	1.75	75411	0.0115	2031	1.58
LOC105376454	1.74715	1.58126	1	GCCGAGGCGGGCAGATCACG	1.75	75411	0.0115	2031	1.58
LOC100507516	1.74715	1.58126	1	GCCGAGGCGGGCAGATCACG	1.75	75411	0.0115	2031	1.58
LOC105371105	1.74715	1.58126	1	GCCGAGGCGGGCAGATCACG	1.75	75411	0.0115	2031	1.58
LOC105370273	1.74715	1.58126	1	GCCGAGGCGGGCAGATCACG	1.75	75411	0.0115	2031	1.58
CKBP1	1.74715	1.58126	1	GCCGAGGCGGGCAGATCACG	1.75	75411	0.0115	2031	1.58
TPTE2P2	1.74715	1.58126	1	GCCGAGGCGGGCAGATCACG	1.75	75411	0.0115	2031	1.58
LOC102723824	1.74715	1.58126	1	GCCGAGGCGGGCAGATCACG	1.75	75411	0.0115	2031	1.58
TRIM52-AS1	1.74715	1.58126	1	GCCGAGGCGGGCAGATCACG	1.75	75411	0.0115	2031	1.58
PIRC43	1.74715	1.58126	1	GCCGAGGCGGGCAGATCACG	1.75	75411	0.0115	2031	1.58
LOC105378260	1.74715	1.58126	1	GCCGAGGCGGGCAGATCACG	1.75	75411	0.0115	2031	1.58
LOC105378262	1.74715	1.58126	1	GCCGAGGCGGGCAGATCACG	1.75	75411	0.0115	2031	1.58
LOC105371874	1.74715	1.58126	1	GCCGAGGCGGGCAGATCACG	1.75	75411	0.0115	2031	1.58
SPATA3-AS1	1.74715	1.58126	1	GCCGAGGCGGGCAGATCACG	1.75	75411	0.0115	2031	1.58
LOC105372666	1.74715	1.58126	1	GCCGAGGCGGGCAGATCACG	1.75	75411	0.0115	2031	1.58
LOC107985939	1.74715	1.58126	1	GCCGAGGCGGGCAGATCACG	1.75	75411	0.0115	2031	1.58
LOC105378159	1.74715	1.58126	1	GCCGAGGCGGGCAGATCACG	1.75	75411	0.0115	2031	1.58
DLEU1	1.74715	1.58126	1	GCCGAGGCGGGCAGATCACG	1.75	75411	0.0115	2031	1.58
LOC105374552	1.74715	1.58126	1	GCCGAGGCGGGCAGATCACG	1.75	75411	0.0115	2031	1.58
RNF216-IT1	1.74715	1.58126	1	GCCGAGGCGGGCAGATCACG	1.75	75411	0.0115	2031	1.58
LOC105372041	1.74715	1.58126	1	GCCGAGGCGGGCAGATCACG	1.75	75411	0.0115	2031	1.58
LOC100130520	1.74715	1.58126	1	GCCGAGGCGGGCAGATCACG	1.75	75411	0.0115	2031	1.58
LOC101929550	1.74715	1.58126	1	GCCGAGGCGGGCAGATCACG	1.75	75411	0.0115	2031	1.58
LOC102725048	1.74715	1.58126	1	GCCGAGGCGGGCAGATCACG	1.75	75411	0.0115	2031	1.58
LOC105376230	1.74715	1.58126	1	GCCGAGGCGGGCAGATCACG	1.75	75411	0.0115	2031	1.58
LOC100420267	1.74715	1.58126	1	GCCGAGGCGGGCAGATCACG	1.75	75411	0.0115	2031	1.58
LOC105374690	1.74715	1.58126	1	GCCGAGGCGGGCAGATCACG	1.75	75411	0.0115	2031	1.58
CRYBB1	1.72102	2.79799	4	CCGTCGAGCAGAATTCTCGG;AGGACATGAGCCGATCACTG;CCAGGATGAACATCTCCCCG;GAAGTTGGCCCCTTCAAACA	1.17;1.22;1.49;3.0	70793;71348;73880;77331	2.64E+00;1.50E+00;7.97E-01;2.47E-03	111;3562;6094;6649	2.24E+00;1.94E+00;2.75E+00;4.27E+00
LOC494141	1.70655	2.04078	2	TGCAATACTTCAGTTGAGAA;AATCACATTTCCCATTCAGA	1.42;2.0	73286;76311	9.93E-01;1.28E-02	1131;4156	1.54E+00;2.54E+00
SLC25A51P2	1.70655	2.04078	2	TGCAATACTTCAGTTGAGAA;AATCACATTTCCCATTCAGA	1.42;2.0	73286;76311	9.93E-01;1.28E-02	1131;4156	1.54E+00;2.54E+00
SLC25A51P3	1.70655	2.04078	2	TGCAATACTTCAGTTGAGAA;AATCACATTTCCCATTCAGA	1.42;2.0	73286;76311	9.93E-01;1.28E-02	1131;4156	1.54E+00;2.54E+00
RPS7P4	1.70424	1.53717	1	AAATTGAAGTTGGTGGTGGT	1.7	75194	0.0128	2248	1.54
LOC107986925	1.67671	1.51587	1	GGAAGCCACTGTGTGCCGGT	1.68	75081	0.0134	2361	1.52
LOC101927751	1.65403	1.99196	2	CAGAGAGCCGAGATAAAGGG;CGTCCGCACACACGATGCAG	1.42;1.89	73308;76005	9.95E-01;1.63E-02	1437;4134	1.44E+00;2.55E+00
EIF2S2P4	1.65177	1.89327	2	TCAAGAACCAACTGAACCAG;CCTCCACAAGTCGTCCGAGT	1.13;2.18	70201;76711	7.71E-01;8.23E-03	731;7241	1.73E+00;2.06E+00
FADS2	1.63536	3.29586	6	CAAGGCAGGCAGATCACCTG;GGGCGAATGGCAGCCCATCG;GCCGAGGCGGGCAGATCACG;CCACGAATTCCAGGTCAGGG;TCTGGTACTGGAAATACATG;ATAACCTGCGCACCGACAGG	-0.53;0.67;1.75;2.07;2.3;3.56	36237;62617;75411;76497;76888;77398	9.22E-01;1.88E+00;3.48E+00;2.67E+00;1.38E+00;1.45E-03	44;554;945;2031;14825;41205	2.47E+00;3.13E+00;4.46E+00;5.17E+00;2.90E+00;1.64E+00
ADRM1	1.615	2.68166	4	GCTTGAACTCACAGTCGTCA;ACGTGCTGAAGTTCAAGGCA;CACGAACTCTCTGCGCTAGG;GTGACTCCGGATAAGCGGAA	0.86;1.11;2.2;2.28	66245;70021;76752;76870	1.99E+00;1.35E+00;1.46E+00;1.29E-02	572;690;7421;11197	1.54E+00;3.33E+00;2.50E+00;3.36E+00
PEX16	1.60744	2.67074	4	AATGTACAAAAACTCTGCGA;GGGGAAGCGGTCAAACCGGG;CGAGGGCGATGACAAGCCAG;GCTTCGGAAAAAGTTGCCTG	0.16;1.74;1.98;2.55	51415;75355;76267;77129	9.97E-01;2.39E+00;1.24E+00;7.01E-03	313;1175;2087;26027	1.80E+00;2.87E+00;4.12E+00;1.89E+00
HMGN3P1	1.60344	1.44274	1	CTAGTCTCCAGAGAATACAG	1.6	74648	0.016	2794	1.44
LOC105373975	1.5836	1.42389	1	GGTGGTGTCCCTGTATGCGG	1.58	74524	0.0167	2918	1.42
ANTXR1	1.58166	2.52526	4	CTTCCGACATGCCCGCAACG;ATAAAGGACATTCTCAACTG;GGAGACACTTACATGCATGA;GTTATGACTTACACAGTGTG	0.69;1.37;1.62;2.65	63028;72912;74740;77190	1.68E+00;1.74E+00;9.02E-01;5.64E-03	252;2702;4530;14414	1.89E+00;2.17E+00;3.12E+00;2.92E+00
MBOAT7	1.56196	2.73769	4	TGACCAGAGAATGCAAAGTG;CTGAGTGTCTCCATCAGGGA;CTTCCGCATGCGCTTCTACG;AGCTGGACGGCATTGGTGAA	1.22;1.36;1.61;2.06	71291;72789;74665;76473	2.73E+00;1.72E+00;8.91E-01;2.19E-02	969;2777;4653;6151	1.32E+00;2.14E+00;3.09E+00;4.40E+00
PEX10	1.55211	2.52057	4	AGGCAACATGTAGCCGCTGG;TCATCCAGGTGGACCCATCG;AGGACGAGTACTACCGCGGT;GGAGCTTCTACCTGCAAGTG	0.9;1.0;1.87;2.44	66953;68553;75922;77035	2.07E+00;1.21E+00;1.13E+00;9.13E-03	407;1520;8889;10489	1.68E+00;2.65E+00;2.27E+00;3.47E+00
TAF6L	1.54528	2.77796	4	GCAGACGAACTCCAAGATTG;CACCCCTTACCCGATCCTTG;AGATCCTGGCAGATCCTGTG;TCATGAAGCACACCAAACGC	1.26;1.31;1.8;1.81	71748;72315;75685;75726	2.83E+00;1.64E+00;1.07E+00;3.89E-02	1716;1757;5127;5694	1.08E+00;2.53E+00;2.97E+00;4.53E+00
VNN1	1.52776	2.64439	4	AACACCAGTGTCTCGTGAGG;TTATGGCTGGAACTTCAACA;GGTGGGAATCCAGTTGCGAG;AATTCAACAGCTGACAAATG	1.15;1.21;1.75;2.0	70513;71205;75406;76336	2.58E+00;1.48E+00;1.01E+00;2.50E-02	1106;2036;6237;6929	1.26E+00;2.41E+00;2.72E+00;4.19E+00
VCAN-AS1	1.51346	1.35864	1	AGACAGAGGCAGGACTACGT	1.51	74051	0.0194	3391	1.36
ATXN7L3	1.50762	2.35145	4	GCTTCGCAGCCTGCTAACCA;GCAGCCGAATCGCCAACCGC;CATCGCTCAGGAGATATACG;CACGGACCCTGATAGCATGA	0.51;1.06;1.87;2.6	59268;69329;75932;77161	1.40E+00;1.28E+00;1.13E+00;6.29E-03	281;1510;8113;18174	1.84E+00;2.66E+00;2.39E+00;2.52E+00
PAICS	1.50744	2.79033	5	CAAGGCAGGCAGATCACCTG;TACGAATTGTTAGACAGTCC;TGCAGCTAGAAAAAACCACC;GTGGGTTGCAGAGAGAGTAG;ATTGGAATCATTTCACACTG	-0.53;1.35;1.44;2.36;2.92	36237;72676;73486;76959;77309	7.27E-01;2.69E+00;1.65E+00;1.52E+00;3.70E-03	133;483;3956;4766;41205	2.07E+00;3.42E+00;2.92E+00;4.17E+00;1.37E+00
NXF3	1.5072	2.55939	4	GATCTTGAACCAGCTCCCTA;GGTGAACCGTGATACTAAGA;TGTACCCTTCGTCCCAGTTG;ATTTCACCCTATAATCGGAA	-0.13;1.76;2.0;2.4	44412;75476;76322;76998	7.50E-01;2.44E+00;1.26E+00;9.97E-03	444;1120;1966;33030	1.65E+00;2.91E+00;4.20E+00;1.48E+00
TRAPPC6A	1.50388	3.15839	5	CTGCGCACCAATCACCAGGT;TGGGCCAGGCTCTAGGCGAG;GGGACAGAAGATGAGCCTGT;GCCGAGGCGGGCAGATCACG;TGAGTTTCTTCACACGGAGA	1.29;1.31;1.37;1.75;1.8	72127;72338;72887;75411;75648	3.99E+00;2.60E+00;1.54E+00;9.29E-01;5.09E-02	1794;2031;4555;5104;5315	9.77E-01;2.20E+00;2.74E+00;4.06E+00;5.82E+00
IFNB1	1.48781	2.49287	4	CATCTCATAGATGGTCAATG;AGACAAGATTCATCTAGCAC;GATGAACTTTGACATCCCTG;GCCTCCCATTCAATTGCCAC	1.03;1.12;1.62;2.18	68992;70094;74782;76706	2.33E+00;1.35E+00;9.08E-01;1.66E-02	736;2660;7348;8450	1.43E+00;2.18E+00;2.51E+00;3.85E+00
TCEA1P2	1.4836	1.33195	1	TCGCAAGCAGAGTACAGATG	1.48	73836	0.0207	3606	1.33
MMD	1.4819	2.56501	4	CCACGATGGCCGGAACAATG;AGCAGTCATCAGACAGCCGA;GCAGCATGTTCATAGCAAGT;CAACGCATATGAGATGCCAG	0.56;1.68;1.79;1.9	60353;75111;75610;76040	1.48E+00;2.29E+00;1.06E+00;3.17E-02	1402;1832;2331;17089	1.16E+00;2.49E+00;3.98E+00;2.63E+00
TADA1	1.48151	2.8004	5	AGCTCATAGACTTCTCACAC;AAAGCTTATCGGTTACGAGA;AGTGGGAAGCATCATTGTGT;GCCGAGGCGGGCAGATCACG;AGAACTTAAGCGAGGCCCTG	0.93;0.95;1.43;1.75;2.35	67405;67724;73409;75411;76946	2.91E+00;1.82E+00;1.64E+00;9.29E-01;1.39E-02	496;2031;4033;9718;10037	1.51E+00;2.20E+00;2.90E+00;2.97E+00;4.44E+00
HMBS	1.48006	2.47597	4	AAGATGAGAGTGATTCGCGT;CAGCATACATGCATTCCTCA;AGCGGGGAAACCTCAACACC;ATCAAGAATCTTGTCCCCTG	0.85;1.18;1.85;2.04	66050;70843;75881;76428	1.96E+00;1.44E+00;1.12E+00;2.29E-02	1014;1561;6599;11392	1.30E+00;2.63E+00;2.65E+00;3.33E+00
SPDYE19P	1.4605	1.31091	1	CTCGGGGTACCCCCTCCAGG	1.46	73657	0.0218	3785	1.31
PPIAP2	1.45848	1.61029	2	AATGCTGGACCCAACACAAA;GCCAAGACTGAGTGGTTGGA	0.32;2.6	55141;77160	3.87E-01;3.16E-03	282;22301	2.14E+00;1.08E+00
PPIAP3	1.45848	1.61029	2	AATGCTGGACCCAACACAAA;GCCAAGACTGAGTGGTTGGA	0.32;2.6	55141;77160	3.87E-01;3.16E-03	282;22301	2.14E+00;1.08E+00
LOC402213	1.45848	1.61029	2	AATGCTGGACCCAACACAAA;GCCAAGACTGAGTGGTTGGA	0.32;2.6	55141;77160	3.87E-01;3.16E-03	282;22301	2.14E+00;1.08E+00
PPIAP25	1.45848	1.61029	2	AATGCTGGACCCAACACAAA;GCCAAGACTGAGTGGTTGGA	0.32;2.6	55141;77160	3.87E-01;3.16E-03	282;22301	2.14E+00;1.08E+00
MGAM2	1.45312	2.25211	4	TACGGATGACAGGACAACAT;ATGGTGTCATAGTAACAGGT;GACACCAATGACATTGTCTG;TAGTGGGGATAGACCATCGG	0.04;1.06;2.03;2.69	48592;69293;76414;77210	8.87E-01;1.27E+00;1.29E+00;5.19E-03	232;1028;8149;28850	1.93E+00;2.99E+00;2.38E+00;1.72E+00
PARD6G-AS1	1.45212	1.30396	1	ATCTCGCGCATGGTACCCGG	1.45	73596	0.0221	3846	1.3
ZNF165	1.43345	2.44578	4	TGGGTAATGTTCATGTACCC;TGTAACTTGACATTAAGTGC;GGTGAAATAATAAGCCACGA;AGGCAGGGTAAAGAGACAAT	-0.06;1.62;2.07;2.1	46004;74755;76504;76563	7.99E-01;2.17E+00;1.33E+00;1.98E-02	879;938;2687;31438	1.36E+00;3.07E+00;3.79E+00;1.57E+00
MEMO1P1	1.43022	1.28302	1	GAAAGTGCACATCGAGAGAG	1.43	73406	0.0232	4036	1.28
LOC100420311	1.42957	1.28237	1	CCCTGCCCTACAGGTCATGA	1.43	73400	0.0233	4042	1.28
CD5L	1.42939	2.48431	4	CCCAGAAGGGCAATCCTGAA;CTCATACAAAATACCACTAG;ATCCAATCAGTCAGTTGCAC;ACACCACCTTTGCGGCCCGG	0.82;1.51;1.62;1.77	65573;74001;74721;75551	1.91E+00;1.97E+00;8.99E-01;4.29E-02	1891;2721;3441;11869	1.04E+00;2.16E+00;3.47E+00;3.26E+00
PXMP4	1.42878	2.44013	4	GTTCCAGGAGTGGATATATG;CAAACACCAGGATACCCCCG;GTTCCGGAAGCCCTTAAGCA;AAGGTCATGACCAGCGCGTG	1.01;1.32;1.37;2.03	68606;72370;72823;76399	2.28E+00;1.65E+00;7.03E-01;2.35E-02	1043;4619;5072;8836	1.29E+00;1.72E+00;2.98E+00;3.77E+00
LOC107985393	1.42143	1.27566	1	CAAGCTCTACGACAACCACG	1.42	73337	0.0236	4105	1.28
TBC1D8B	1.41834	2.39115	4	GTTTACTTGTCAATTGCATG;AAAGACTGCCTGATCCACCA;TGCACCTCAAAATTATCAGA;TCAGCCACTTCAATACTCAT	0.79;1.2;1.82;1.87	64996;71094;75749;75928	1.86E+00;1.47E+00;1.09E+00;3.43E-02	1514;1693;6348;12446	1.13E+00;2.56E+00;2.69E+00;3.18E+00
ARNT	1.41422	2.84002	5	TCCTGCCTCAGCCTCCCGAG;TGGATTGTGTTGGAGAGTGT;TGGGGAACCTCACTTCGTGG;CAAGCTAACCATCTTACGCA;AGATGTCTAACGATAAGGAG	-0.4;1.56;1.73;2.01;2.17	38719;74357;75317;76369;76692	8.06E-01;3.24E+00;2.16E+00;1.18E+00;2.11E-02	750;1073;2125;3085;38723	1.33E+00;2.74E+00;3.71E+00;4.92E+00;1.51E+00
DBNDD2	1.41079	2.34888	4	GGAAGTGAATGTGGACACAC;AGTAGAACTTATTGACCTTG;GGGCATACCAGACGACTGGG;CTGCGACTCGAGATGCAGAT	1.02;1.13;1.25;2.25	68824;70209;71684;76822	2.31E+00;1.37E+00;6.27E-01;1.39E-02	620;5758;7233;8618	1.50E+00;1.55E+00;2.53E+00;3.81E+00
TADA3	1.40871	2.32621	4	ATGACCCTATCGACGTGCCA;GGATGATGGCATCGGCATCG;TCAGTAACTCCTCAAGTGTG;TCTTATCCTGCCAGTCGGTG	0.85;1.28;1.29;2.21	66080;71987;72124;76775	1.97E+00;1.59E+00;6.54E-01;1.50E-02	667;5318;5455;11362	1.47E+00;1.61E+00;2.89E+00;3.33E+00
NR2F2	1.40387	2.55773	4	TATATCCGGACAGGTACGAG;ACATTTGCGAACTGGCCGCG;TGGGACAGTTCCGGTTGGCG;GTGTGCGGAGACAAGTCGAG	-1.49;1.44;2.5;3.17	23949;73498;77097;77357	3.90E-01;1.85E+00;1.76E+00;1.89E-03	85;345;3944;53493	2.36E+00;3.93E+00;3.30E+00;6.43E-01
FKBP1AP3	1.39967	1.2553	1	GAAACCATCTCCCCAGGAGA	1.4	73140	0.0248	4302	1.26
MIR6869	1.39967	1.2553	1	GAAACCATCTCCCCAGGAGA	1.4	73140	0.0248	4302	1.26
RBMS2P1	1.39654	1.25248	1	CGTATCCTTCGAGATACCAG	1.4	73112	0.025	4330	1.25
ATXN7	1.39571	2.32259	4	CATACTCACATTCTACCATG;TGTCCGGTGAGGAATACGTG;TAATGTGATTGAAATGCCTG;CGAGCACAAAAACAAAACCA	0.91;1.1;1.55;2.03	67003;69935;74289;76402	2.07E+00;1.34E+00;8.42E-01;2.35E-02	1040;3153;7507;10439	1.29E+00;2.04E+00;2.48E+00;3.48E+00
AGER	1.39174	2.26039	4	GTGCTCAAAACATCACAGCC;TGGAATTCTTACGGTAGACA;GTCAGGGTTACGGTTCCACC;CATCATAGGAGTATCTGTGA	0.74;1.01;1.73;2.09	64025;68595;75308;76553	1.76E+00;1.21E+00;9.94E-01;2.00E-02	889;2134;8847;13417	1.35E+00;2.37E+00;2.28E+00;3.05E+00
ZNF174	1.38891	2.36218	4	GTGAACCTCGGTTGTCACGG;CCCAGGCAGGAGCTTATGAC;TGTCAGCTGGCAGATCCAAA;TCTGTGAAAATCTTCCACGA	0.81;1.34;1.59;1.83	65244;72560;74561;75788	1.88E+00;1.68E+00;8.77E-01;3.75E-02	1654;2881;4882;12198	1.10E+00;2.11E+00;3.03E+00;3.21E+00
LOC102724584	1.38736	1.24443	1	CACTTCGACCGACAAACCTG	1.39	73031	0.0255	4411	1.24
ZNF415	1.38424	2.71936	5	GAACTCTCCAATGACGCGCA;CAGCATCAGAGAATTCACAC;GTGGTGAAACTGAGGAACCA;AGAGACCAACGCGATAGAAG;GAACTCTCCGATGTAGTGCA	0.7;1.17;1.56;1.66;1.83	63352;70779;74385;74980;75795	2.35E+00;2.27E+00;1.86E+00;8.55E-01;4.67E-02	1647;2462;3057;6663;14090	1.01E+00;2.04E+00;3.25E+00;3.60E+00;3.70E+00
UBE2V1P3	1.38326	1.23983	1	GGAGATGGCACAGTTAGCTG	1.38	72984	0.0257	4458	1.24
LOC107986871	1.38326	1.23983	1	GGAGATGGCACAGTTAGCTG	1.38	72984	0.0257	4458	1.24
UBE2V1P14	1.38326	1.23983	1	GGAGATGGCACAGTTAGCTG	1.38	72984	0.0257	4458	1.24
LOC105375666	1.38326	1.23983	1	GGAGATGGCACAGTTAGCTG	1.38	72984	0.0257	4458	1.24
LOC105378585	1.38014	1.23731	1	CTGGCACGGACACTCGCGGG	1.38	72958	0.0259	4484	1.24
PIGFP2	1.37449	1.23297	1	AAGAAGTTCATTATCACACA	1.37	72913	0.0262	4529	1.23
LOC107987215	1.37381	1.23182	1	CTTCCAACTCTCTGAAATGG	1.37	72901	0.0262	4541	1.23
LOC107984723	1.37381	1.23182	1	CTTCCAACTCTCTGAAATGG	1.37	72901	0.0262	4541	1.23
LOC100652840	1.37381	1.23182	1	CTTCCAACTCTCTGAAATGG	1.37	72901	0.0262	4541	1.23
CITED1	1.37311	2.16687	4	TTCCATTTGAGGCTACCCCA;AACTTAATAGCCAGTATCAG;AGAGCCTATTGGAGATCCCG;CGTGGCCTACTCCAACCTTG	0.05;1.21;1.81;2.42	48864;71170;75734;77023	8.97E-01;1.48E+00;1.08E+00;9.40E-03	419;1708;6272;28578	1.67E+00;2.55E+00;2.71E+00;1.73E+00
GBP2	1.36742	2.1197	4	AACTTTCGGATGCACAACCG;TCCCATGCTATTGTACACGA;GATAGAGAACTCAGCCGCAG;TCACCTAGAGCAGCTAAAGG	-0.19;0.75;2.2;2.7	43137;64312;76751;77220	7.13E-01;9.25E-01;1.46E+00;4.96E-03	222;691;13130;34305	1.94E+00;3.33E+00;1.79E+00;1.41E+00
KAT2A	1.36544	2.27265	4	TGGGGATGTCACCCATCACA;CAAGGTCAATTACACCAGGT;ATATACTCCTTAGGCATGCG;ATGAGATAAACCGACTGCTG	0.9;1.07;1.52;1.97	66971;69416;74108;76228	2.07E+00;1.29E+00;8.21E-01;2.74E-02	1214;3334;8026;10471	1.22E+00;1.99E+00;2.40E+00;3.48E+00
FCRL6	1.36113	2.3681	4	GTCACCAGGCTACCCTCTCG;GAAAACCAGACTCTGTCCAT;TGACTCTGCGATGTCAGGGA;GAAGGAATACAGGATCGGAG	0.91;1.27;1.63;1.64	67142;71880;74808;74847	2.09E+00;1.57E+00;9.12E-01;5.92E-02	2595;2634;5562;10300	9.17E-01;2.19E+00;2.86E+00;3.50E+00
PRAMEF30P	1.3532	1.54203	2	CCTGGATGAGCTGCCCAGGG;AGGGGTTCTTGAGGTACCTG	-0.02;2.73	46924;77236	3.21E-01;2.30E-03	206;30518	2.28E+00;8.09E-01
SLC15A5	1.34895	1.39852	4	AAAAGGAATAAGTAAAACAA;CAAGATGGCAGTATTGCGGG;GTTTGCAGATAATATCCTGA;GAGCCAGAATTAGTAATGGT	-2.5;-0.03;0.64;7.29	15011;46590;61972;77437	3.91E-01;4.63E-01;3.88E-01;8.97E-05	5;15470;30852;62442	3.59E+00;8.14E-01;8.18E-01;3.74E-01
PSMD3	1.34725	2.35023	4	GGGGAGCAAAAAGTCTCGAG;GTGTTACTATTATCACGCCC;GAACAGCAAGCGCTACAAAG;GGTCGTACAAGCTGTAGTGT	0.84;1.42;1.47;1.65	65920;73339;73754;74949	1.95E+00;1.82E+00;7.84E-01;5.68E-02	2493;3688;4103;11522	9.33E-01;1.91E+00;3.25E+00;3.31E+00
LPCAT3	1.34143	3.0471	6	CAAGGCAGGCAGATCACCTG;GCGCGTCAGAACAGGCGCTG;TGGTGCGGCCCATTAGTCGA;CTGTTGACTACTTTGACGGA;GCCGAGGCGGGCAGATCACG;TAGTGATTCATTGAGAACTG	-0.53;1.28;1.67;1.73;1.75;2.15	36237;72061;75059;75324;75411;76655	9.22E-01;3.52E+00;3.28E+00;2.00E+00;8.61E-01;2.66E-02	787;2031;2118;2383;5381;41205	1.24E+00;2.03E+00;3.42E+00;4.90E+00;5.04E+00;1.64E+00
EPAS1	1.33859	2.18951	4	TAGCCACACAGACTATTGTG;CCTATTCACCAAGCTAAAGG;TGTTCTCGGAGTCTAGCGCA;ACTGGCACCCTATATCCCCA	0.37;1.34;1.63;2.01	56307;72616;74819;76351	1.23E+00;1.69E+00;9.13E-01;2.46E-02	1091;2623;4826;21135	1.27E+00;2.19E+00;3.04E+00;2.26E+00
SEC14L1	1.33406	2.3433	4	TCACACCAGGTCTCCACAAG;CTCCCGCGTAGTAATCCTGA;ATGGAAGGCGGACTCCAACG;TATTAAAATCCCGTGCACGG	1.06;1.15;1.51;1.62	69360;70472;74012;74745	2.39E+00;1.40E+00;8.11E-01;6.16E-02	2697;3430;6970;8082	9.02E-01;1.97E+00;2.58E+00;3.93E+00
LEP	1.32347	1.94744	4	TTCTGGAAGGCATACTGGTG;GATCAATGACATTTCACACA;GAACCCTGTGCGGATTCTTG;GATCCAAATATCCAACGACC	0.52;0.57;1.26;2.94	59554;60635;71810;77315	1.42E+00;7.61E-01;6.35E-01;2.83E-03	127;5632;16807;17888	2.19E+00;1.56E+00;1.49E+00;2.55E+00
LOC339975	1.31402	1.49904	2	CACCTTCAACTAATTGGATG;GCCGAGGCGGGCAGATCACG	0.88;1.75	66582;75411	6.18E-01;2.31E-02	2031;10860	1.29E+00;1.71E+00
FAM92A1P1	1.31255	1.18081	1	TCAGGATTATCGACAAGCAG	1.31	72335	0.0296	5107	1.18
LOC102723706	1.31116	1.49498	2	GGTACATACGAGTGTCCTGT;GCCGAGGCGGGCAGATCACG	0.88;1.75	66480;75411	6.14E-01;2.31E-02	2031;10962	1.29E+00;1.70E+00
VMP1	1.30855	2.69407	6	CAAGGCAGGCAGATCACCTG;ATGGCATCGTCAAAGCATTG;GATTGCTGTACCGATACCCT;AATTCCTAAGCCTATCCAGT;GCCGAGGCGGGCAGATCACG;AATGTAACTGAGGCTATATG	-0.53;1.02;1.26;1.67;1.75;2.7	36237;68759;71784;75025;75411;77219	9.22E-01;2.73E+00;2.21E+00;1.89E+00;8.61E-01;7.48E-03	223;2031;2417;5658;8683;41205	1.77E+00;2.03E+00;3.26E+00;3.44E+00;4.03E+00;1.64E+00
LIPT2	1.30829	2.21668	4	GCCCGCCTCAGTCCCCGACG;GCCACCCGGTACTCGACCTG;GTCTAGCCAGACGCCAGTGT;CATGCACGTAGCGTCGCTGG	0.13;1.52;1.74;1.84	50785;74083;75398;75826	9.71E-01;1.99E+00;1.01E+00;3.66E-02	1616;2044;3359;26657	1.11E+00;2.40E+00;3.51E+00;1.85E+00
CYP2A13	1.29629	1.95553	4	CACGCCAAAACCCCTTAGGG;TGGGATGTACCTCCTGCATG;CAGGAAACCGTAGCGCAGGG;AGTTCACGGCAACCTCCACG	-0.33;0.65;1.91;2.95	40144;62186;76075;77319	6.35E-01;8.24E-01;1.17E+00;2.74E-03	123;1367;15256;37298	2.20E+00;2.74E+00;1.61E+00;1.27E+00
NGRN	1.29138	1.46804	4	TTCCCGTAGGTATTTACATG;CCGGCTCCCAGTCGGAATCG;AGGTATTTCCAGAGCCCCGG;TCCGATTCCAGAAAATTCGG	-1.16;0.03;0.53;5.77	27267;48436;59711;77436	4.17E-01;4.82E-01;3.77E-01;1.12E-04	6;17731;29006;50175	3.51E+00;7.28E-01;8.81E-01;7.54E-01
BEX1	1.28779	2.14047	4	AGCAGTAAACAGTCTCAGCA;ATTCACCAGCATCCAAAGGG;GTGTGCCTAGAGGAAATCGT;ATAGATGGGATATGATGCAT	0.81;0.88;1.64;1.81	65393;66638;74903;75722	1.90E+00;1.06E+00;9.26E-01;3.90E-02	1720;2539;10804;12049	1.08E+00;2.22E+00;2.03E+00;3.23E+00
CSAD	1.28493	2.25656	5	GGCCCTATTCACATCGAAGG;GTCAAAGGCCCCTAGCACAG;CAGAGGGAAAATGGTCCCCG;GCTACAGTGTCAAGACTGGT;ATGGCTATTTGAATAAGTGA	0.52;0.74;0.74;1.95;2.48	59504;64034;64094;76162;77077	1.96E+00;1.45E+00;7.74E-01;1.11E+00;1.02E-02	365;1280;13348;13408;17938	1.64E+00;2.59E+00;1.46E+00;2.43E+00;3.18E+00
ACKR1	1.28422	2.0995	4	CTGCACCCTGATATACAGCA;AGCTAGGATACCCAGGACAC;CAATGGCAACAAGACAAAGA;GAAGGAATCATTCACACCAT	0.55;1.11;1.61;1.87	60283;70032;74681;75924	1.47E+00;1.35E+00;8.93E-01;3.44E-02	1518;2761;7410;17159	1.13E+00;2.15E+00;2.50E+00;2.62E+00
GDF3	1.28351	1.93075	4	AGAAAGGGAACAGTTGACAT;GGAGCATCTTAGTCTGGCAC;TGGTTCAGGAGCCTCATGTG;GAAAGCGAAGTACATTCCCG	0.15;0.49;1.79;2.7	51246;58837;75635;77227	9.90E-01;6.99E-01;1.06E+00;4.81E-03	215;1807;18605;26196	1.96E+00;2.51E+00;1.38E+00;1.88E+00
DUSP7	1.2809	2.01471	4	AGCAGTGCCACCGAGTCAGA;CACCGTGCTGCTCTACGACG;GACGACTCGAAGAGCTCGTG;CTACAGAAGCTGCGCGACGA	0.59;0.86;1.5;2.18	60940;66247;73952;76707	1.52E+00;1.04E+00;8.04E-01;1.65E-02	735;3490;11195;16502	1.43E+00;1.95E+00;1.99E+00;2.69E+00
LOC100421419	1.27814	1.15194	1	ACTTCAGCTCCTGAGCCAAG	1.28	71984	0.0317	5458	1.15
LINC02533	1.27814	1.15194	1	ACTTCAGCTCCTGAGCCAAG	1.28	71984	0.0317	5458	1.15
LOC105374894	1.27814	1.15194	1	ACTTCAGCTCCTGAGCCAAG	1.28	71984	0.0317	5458	1.15
EFCAB3	1.27804	1.96349	4	CCATCCACATTAGGGAACAA;ATGTGCACTGTAGCTAAGCT;AGATAAGAATCTCTTCCTCA;CTGGTAAGTCTCTATCCCTG	0.41;1.08;1.1;2.53	57071;69550;69870;77119	1.27E+00;1.30E+00;5.42E-01;7.24E-03	323;7572;7892;20371	1.78E+00;1.33E+00;2.42E+00;2.32E+00
NAGS	1.26619	1.99096	4	ATCTTCCTCAATAACACAGG;CCAGACCTGCCATCACTCCG;ATGACGGCCGAGGAGTGGTG;ACCAGCGAGCGGCCCGAAGG	0.1;1.07;1.66;2.23	49989;69475;75018;76808	9.39E-01;1.29E+00;9.44E-01;1.43E-02	634;2424;7967;27453	1.50E+00;2.26E+00;2.41E+00;1.80E+00
SLC22A13	1.25829	2.02114	4	GCCATGTAGAGCTCAAAGCT;CCTACGGTTTCCGCAACTGG;GAGTTTCCGCCTATTGACCG;TCACAAACCAGGTTGAACTG	0.59;1.01;1.45;1.98	60930;68686;73608;76256	1.52E+00;1.22E+00;7.69E-01;2.68E-02	1186;3834;8756;16512	1.23E+00;1.88E+00;2.29E+00;2.68E+00
KRTAP24-1	1.25386	2.05354	4	GTTTGACGGGTCACAACCAG;ACAGTGAGTTCTGTATGATG;ACTGGGTAAGCAGTGTCCAA;GCTTTGGATGCATTTCGAGT	0.85;0.86;1.33;1.97	66074;66215;72516;76238	1.97E+00;1.04E+00;6.80E-01;2.72E-02	1204;4926;11227;11368	1.23E+00;1.67E+00;1.98E+00;3.33E+00
LOC101060236	1.2508	1.12923	1	GAGTAAAGCTTCCGATAGAG	1.25	71691	0.0335	5751	1.13
DPPA3P1	1.2508	1.12923	1	GAGTAAAGCTTCCGATAGAG	1.25	71691	0.0335	5751	1.13
MYOC	1.25	2.08374	4	TAAGTTATGGATGACTGACA;TGAGGTCATACTCAAAAACC;CCAGAACTGACTTGTCTCGG;CCATCTGGCTATCTCAGGAG	0.54;1.21;1.57;1.69	59984;71148;74442;75127	1.45E+00;1.48E+00;8.61E-01;5.27E-02	2315;3000;6294;17458	9.62E-01;2.08E+00;2.71E+00;2.59E+00
LOC107984271	1.24511	2.09981	4	TGTTGAGAATGACAAACTAG;GTCTTCACAAAATCAGCTCA;ACGACATGGTCCCTTACTGA;GCCGAGGCGGGCAGATCACG	0.84;1.09;1.3;1.75	65851;69792;72232;75411	1.94E+00;1.32E+00;6.61E-01;4.61E-02	2031;5210;7650;11591	1.01E+00;1.63E+00;2.46E+00;3.30E+00
LOC105447645	1.24448	2.17259	4	AGGGGTCCATGTTCGCCGAG;TAGCGAAGATTCAAGCCATG;GGAATACCGCCACATCCCGG;CTGCTGTAGGTATCGCCGGT	0.98;1.07;1.4;1.54	68153;69396;73111;74215	2.22E+00;1.28E+00;7.25E-01;7.39E-02	3227;4331;8046;9289	8.34E-01;1.78E+00;2.40E+00;3.68E+00
FUT2	1.24448	2.17259	4	AGGGGTCCATGTTCGCCGAG;TAGCGAAGATTCAAGCCATG;GGAATACCGCCACATCCCGG;CTGCTGTAGGTATCGCCGGT	0.98;1.07;1.4;1.54	68153;69396;73111;74215	2.22E+00;1.28E+00;7.25E-01;7.39E-02	3227;4331;8046;9289	8.34E-01;1.78E+00;2.40E+00;3.68E+00
PEX12	1.24229	1.9261	4	GGCCATGTTCACAAATGGGT;GCTTAAAGAGAATTGTAATG;TCTGGAGCACAAACCAGCTA;GAGACCCGCTCTTCAGCATG	0.3;0.87;1.58;2.22	54619;66369;74510;76790	1.14E+00;1.05E+00;8.70E-01;1.47E-02	652;2932;11073;22823	1.48E+00;2.10E+00;2.00E+00;2.12E+00
PITPNM1	1.23666	1.92895	4	TTGACCGAGTGATAAAGCCG;TACTGACCATGCTCCCACGG;TCAACACCCACCTCTACTAG;CACACACAAGGTGTACCACG	0.32;0.73;1.74;2.16	55049;63856;75377;76679	1.16E+00;9.01E-01;1.01E+00;1.72E-02	763;2065;13586;22393	1.42E+00;2.39E+00;1.75E+00;2.16E+00
ZFY-AS1	1.23492	1.66883	3	GCATGAGCAGCAAATTGATG;CAGTCAAAGGATGACCATCA;GATAAGTTTACATAACCACC	0.08;1.42;2.21	49621;73280;76761	6.05E-01;8.41E-01;1.15E-02	681;4162;27821	1.59E+00;2.09E+00;1.33E+00
ARMCX6	1.23468	2.08302	4	TGGGGATTGGACTGAACCTG;GAGCACACCCAATAAAACAG;TGCGTTTACAAACTGACCAT;AGAGGAGTGGGACGATGACC	0.83;0.98;1.45;1.67	65773;68214;73574;75056	1.93E+00;1.18E+00;7.66E-01;5.43E-02	2386;3868;9228;11669	9.50E-01;1.87E+00;2.22E+00;3.29E+00
HDAC1	1.23263	2.20704	5	CATCCGTCCAGATAACATGT;TGAGTCATGCGGATTCGGTG;GCACCGGGCAACGTTACGAA;GCCGAGGCGGGCAGATCACG;GGAGATGTTCCAGCCTAGTG	-0.24;1.02;1.24;1.75;2.4	41920;68733;71607;75411;77005	9.22E-01;1.95E+00;1.35E+00;9.29E-01;1.23E-02	437;2031;5835;8709;35522	1.56E+00;2.20E+00;2.44E+00;3.15E+00;1.69E+00
BEX5	1.23261	2.20241	4	ATTCACCACCTCCTAAAGCG;TGATATGGAACGGTTCATGG;GCCTGGAGGAAATGTTAAAG;CACATCCTCTCCAAAACCCG	-0.43;1.73;1.73;1.9	38130;75314;75335;76032	5.89E-01;2.37E+00;9.99E-01;3.19E-02	1410;2107;2128;39312	1.16E+00;2.38E+00;4.09E+00;1.18E+00
ZNF813	1.22972	1.86802	4	GTTACTCACACAAAAACAGG;CCATCGTAGATGTCACACTG;AGACATGAAAGTCATCACAC;TCCACATGTTTCAGACCCAA	0.26;0.94;1.28;2.44	53760;67585;71960;77036	1.10E+00;1.13E+00;6.44E-01;9.11E-03	406;5482;9857;23682	1.69E+00;1.59E+00;2.14E+00;2.06E+00
CAPRIN1	1.22828	2.07441	5	CAATAAAGAAGACAGCACGT;AGTGCCAATATTGTCCGAAG;TTTGGTATCATCCACAAGTG;GCCGAGGCGGGCAGATCACG;GGGTGATCGACAAGAAACTT	0.14;0.54;1.07;1.75;2.65	50865;59905;69516;75411;77191	1.34E+00;1.16E+00;1.12E+00;9.29E-01;7.02E-03	251;2031;7926;17537;26577	1.80E+00;2.20E+00;2.06E+00;1.99E+00;2.32E+00
CYSLTR1	1.22467	2.2489	5	CAAGGCAGGCAGATCACCTG;CATACAAAGCATAGGTGCTG;AATACCTACACACACAAACC;TGTGAACATAATAGACCACA;AGGTGGAATACACTTGATTG	-0.53;0.97;1.43;1.84;2.42	36237;68031;73380;75839;77018	7.27E-01;1.86E+00;1.63E+00;1.02E+00;1.19E-02	424;1603;4062;9411;41205	1.57E+00;2.40E+00;2.89E+00;3.02E+00;1.37E+00
COX7CP1	1.22419	1.10578	1	TGTTGGGCCAGAGCATCCGG	1.22	71372	0.0354	6070	1.11
FKBP3	1.22112	2.32409	5	TTATATACAGACCTCATCCA;GCAGGAACACGGTTCAGATT;GGTTATAGGCTGTAACCAAG;GCCGAGGCGGGCAGATCACG;ATACAGGAACACTACAAGAT	0.11;0.75;1.74;1.75;1.75	50293;64214;75399;75411;75443	1.31E+00;1.47E+00;2.19E+00;9.29E-01;5.68E-02	1999;2031;2043;13228;27149	9.35E-01;2.20E+00;3.76E+00;2.45E+00;2.28E+00
PSMD10P2	1.21844	1.10045	1	CAGCAGAACTGCATTGCACT	1.22	71297	0.0359	6145	1.1
CDK5RAP3	1.21473	1.9907	4	GGAGGTGATGGGATAGACTG;TGCTTGAATACACTGAGACC;GTGGGGTCGTTCCACCACAG;CAAAGAGAAGATGGTTACCA	0.51;0.94;1.69;1.71	59472;67605;75136;75226	1.42E+00;1.13E+00;9.64E-01;5.04E-02	2216;2306;9837;17970	9.79E-01;2.30E+00;2.15E+00;2.54E+00
CCDC88C	1.21402	1.92489	4	ACCACCTCAACCGAGCCATG;GCAACTTACAGCGGCCTACG;GACAGCGGCAGTGACACGTG;ACGCAGACTTGTCAGACGGT	0.27;0.38;2.01;2.2	53885;56516;76352;76744	1.11E+00;6.32E-01;1.27E+00;1.57E-02	698;1090;20926;23557	1.45E+00;2.94E+00;1.24E+00;2.07E+00
EIF1P3	1.21147	1.09413	1	CGATAAAAAGAAACTAGTGA	1.21	71207	0.0364	6235	1.09
EIF1P6	1.21147	1.09413	1	CGATAAAAAGAAACTAGTGA	1.21	71207	0.0364	6235	1.09
LOC100129085	1.21112	1.09393	1	TTGATAACAGATTTCTTCTG	1.21	71204	0.0365	6238	1.09
MAGEA9B	1.20927	2.9646	8	GCTCCACAAATATCGAGTCA;GATCACCTGCATGAACTCGG;TTTATGGAGCCAATTCGATG;CCAGCATGCTATCGCACGAG;AGAAGCACTGAAATTGAAGG;GCTCCATAAAGTGTAGTAGA;GAGGAGGAAGCGCCTCCCTG;CTTTGGTTAGGATCACACCC	-0.58;0.54;0.9;0.98;1.61;1.77;2.11;2.35	35387;60070;66893;68174;74673;75526;76593;76942	1.29E+00;2.67E+00;2.77E+00;2.06E+00;2.67E+00;1.83E+00;1.09E+00;2.25E-02	500;849;1916;2769;9268;10549;17372;42055	1.31E+00;2.50E+00;3.13E+00;4.01E+00;3.03E+00;3.88E+00;3.75E+00;2.12E+00
MAGEA9	1.20927	2.9646	8	GCTCCACAAATATCGAGTCA;GATCACCTGCATGAACTCGG;TTTATGGAGCCAATTCGATG;CCAGCATGCTATCGCACGAG;AGAAGCACTGAAATTGAAGG;GCTCCATAAAGTGTAGTAGA;GAGGAGGAAGCGCCTCCCTG;CTTTGGTTAGGATCACACCC	-0.58;0.54;0.9;0.98;1.61;1.77;2.11;2.35	35387;60070;66893;68174;74673;75526;76593;76942	1.29E+00;2.67E+00;2.77E+00;2.06E+00;2.67E+00;1.83E+00;1.09E+00;2.25E-02	500;849;1916;2769;9268;10549;17372;42055	1.31E+00;2.50E+00;3.13E+00;4.01E+00;3.03E+00;3.88E+00;3.75E+00;2.12E+00
RAD21L1	1.20701	1.93073	4	CTACCTGCTAAACTATTGGG;AACCATGAGTGTGTCCGCAA;TAGATTACATTCAAATACAT;ATGTTCAATTAAAGGACCAC	0.44;0.94;1.54;1.9	57851;67610;74229;76048	1.32E+00;1.13E+00;8.35E-01;3.15E-02	1394;3213;9832;19591	1.17E+00;2.02E+00;2.15E+00;2.39E+00
CCAR2	1.20675	1.97129	4	AACGGACACTGATCTCCCAG;GCACGGACAGAAAATCTGAG;ACTCCAAGAAACGCAAACAG;TTACCTTCGAACTATAAGCG	0.67;0.97;1.34;1.84	62742;68055;72602;75837	1.65E+00;1.17E+00;6.86E-01;3.64E-02	1605;4840;9387;14700	1.11E+00;1.69E+00;2.20E+00;2.89E+00
GRHL3	1.20627	2.03295	4	CTTCAAAGATGACCCACAGG;TGTGTGGAACGTGAATGAAG;AGTGACTTTGAATACACCCT;TTATCATACATATCAGTGGT	0.65;1.13;1.46;1.58	62326;70282;73614;74534	1.62E+00;1.37E+00;7.70E-01;6.65E-02	2908;3828;7160;15116	8.73E-01;1.88E+00;2.54E+00;2.84E+00
HTR1A	1.20498	1.99888	4	AGGTGCAGCACAGCACGTCG;TGCTAATGGTGCATGCGTCG;TTGGTAGCTGACGGTCACGT;GTTGAGCACCTGATACAGCG	0.26;1.36;1.39;1.8	53808;72805;73062;75689	1.10E+00;1.72E+00;7.21E-01;3.98E-02	1753;4380;4637;23633	1.07E+00;1.77E+00;3.09E+00;2.06E+00
LOC105378683	1.20446	1.08942	1	ATGCAAGACAGCCTCCCAGC	1.2	71139	0.0369	6303	1.09
RFK	1.20154	1.96574	4	TATCATGCATACCTTCAAAG;CCAACCATAGTAAATACCAG;TGGTCTCAGGTAGCCAACAA;AGCCCCGCACCACTTGACCC	0.8;0.81;1.31;1.9	65070;65236;72310;76020	1.86E+00;9.76E-01;6.66E-01;3.22E-02	1422;5132;12206;12372	1.16E+00;1.64E+00;1.88E+00;3.19E+00
PAICSP1	1.19984	1.90181	4	CTTGAAAGCCTGGTAAGTGT;GCTCCAGAGTTTGCAACCAG;TGCAATACTTCAGTTGAGAA;AATCACATTTCCCATTCAGA	0.39;0.99;1.42;2.0	56812;68372;73286;76311	1.26E+00;1.19E+00;7.40E-01;2.55E-02	1131;4156;9070;20630	1.25E+00;1.81E+00;2.25E+00;2.30E+00
SLC25A51	1.19984	1.90181	4	CTTGAAAGCCTGGTAAGTGT;GCTCCAGAGTTTGCAACCAG;TGCAATACTTCAGTTGAGAA;AATCACATTTCCCATTCAGA	0.39;0.99;1.42;2.0	56812;68372;73286;76311	1.26E+00;1.19E+00;7.40E-01;2.55E-02	1131;4156;9070;20630	1.25E+00;1.81E+00;2.25E+00;2.30E+00
KMT2A	1.19682	2.0027	4	AGGGGTCTTAATGATCCGCG;AAGATCAGTAGCGGTCCCGG;TTGACCATAATTATGCTCAG;AGAAAGGACGTCGATCGAGG	0.37;1.29;1.47;1.65	56231;72137;73734;74963	1.22E+00;1.61E+00;7.82E-01;5.65E-02	2479;3708;5305;21211	9.35E-01;1.90E+00;2.92E+00;2.25E+00
KIR2DL2	1.19617	1.54097	3	TCTCTCCTGCCAGAACCGTG;CCTGTGATGACGATGTCCAG;TCCGTGACTCTCCATACGAG	0.0;0.92;2.66	47512;67320;77198	5.61E-01;5.28E-01;4.09E-03	244;10123;29792	2.03E+00;1.35E+00;1.24E+00
LOC105376032	1.19536	1.08266	1	GGCCGAATCCGTGCTCACCG	1.2	71040	0.0375	6402	1.08
COX7A2L	1.19529	1.90745	4	AGGCCTCGTTTCAGGTAGAC;GGAGGTCAGTTTAGTTGGTG;CCCAGCATAATCATACACTG;CCAGGCGCCACTCGTACCTG	0.07;0.48;2.09;2.14	49339;58710;76541;76648	9.14E-01;6.95E-01;1.35E+00;1.79E-02	794;901;18732;28103	1.40E+00;3.10E+00;1.37E+00;1.76E+00
ARHGEF16	1.19141	1.80946	4	AGACGCTGGGGAGGAAACGT;CATGTTCGAGATCCTCACGT;GAAGGTGGACGCCACCATTG;GCGGAACCAATCCTACCGGG	0.0;0.88;1.48;2.41	47534;66560;73792;77007	8.50E-01;1.06E+00;7.88E-01;9.76E-03	435;3650;10882;30055	1.66E+00;1.92E+00;2.02E+00;1.64E+00
PSMD12	1.18975	1.93881	4	ACTCTACGAATGGTTACCGA;GATTCAGCTGGATCAACATG;GATTTGGTTCACCGAATAAG;GGGTAGGCGCTGATCCACCG	0.78;0.92;0.92;2.14	64874;67175;67259;76642	1.84E+00;1.10E+00;4.63E-01;1.80E-02	800;10183;10267;12568	1.40E+00;1.11E+00;2.09E+00;3.16E+00
EID2	1.1876	1.91763	4	CAGTGTCCCGCAGACAGGCG;GTGGACGAAGAGGGTCCCGA;TGATGCCTAAAACGCTAAGT;GACGTCCCGCAGGCGGAGGT	0.43;0.87;1.66;1.8	57535;66370;74976;75664	1.30E+00;1.05E+00;9.37E-01;4.03E-02	1778;2466;11072;19907	1.07E+00;2.24E+00;2.00E+00;2.36E+00
KRT75	1.18701	1.79986	4	CAAGGTCAAATCTCTGCCCG;CTGGTATAGGAATCAAAGAG;AACAGGTTTGGAGTCAACAG;CGAGGTCAAAGCACAATACG	0.21;0.58;1.56;2.39	52653;60798;74403;76996	1.05E+00;7.67E-01;8.56E-01;1.00E-02	446;3039;16644;24789	1.65E+00;2.07E+00;1.51E+00;1.98E+00
FITM2	1.18546	2.17115	4	CATCTCTTCTACAATCATGA;GCCCGTGTAGTGTTCGATGT;CGGGGTGCACTCACACGTTG;GAGGTAGCTCTCGGGCAACG	1.08;1.1;1.25;1.31	69666;69912;71702;72273	2.44E+00;1.34E+00;6.28E-01;1.20E-01	5169;5740;7530;7776	6.63E-01;1.55E+00;2.48E+00;3.99E+00
XYLT2	1.1758	1.9663	5	TCCTGCCTCAGCCTCCCGAG;CATGTAGGCGATTCGCACCG;AGGACACAGACAGTTCAGCA;ACACCTGGTTGGATAGTCAG;CCAGGGCTATGATAACGTGC	-0.4;-0.1;1.22;1.94;3.21	38719;45145;71366;76144;77366	8.06E-01;6.08E-01;1.32E+00;1.11E+00;2.10E-03	76;1298;6076;32297;38723	2.31E+00;2.57E+00;2.39E+00;1.05E+00;1.51E+00
TEX30	1.17324	1.78957	4	TCTAGTAATTTATTTCCAAA;GATGCCAGTGACATCAAATG;CCTAACAAGAGCTTAACATA;GGCCTTTACAGGTAAATCTC	0.16;0.94;1.23;2.36	51420;67572;71412;76961	9.97E-01;1.13E+00;6.12E-01;1.08E-02	481;6030;9870;26022	1.61E+00;1.51E+00;2.14E+00;1.89E+00
ZNF271P	1.1732	1.0653	1	CAGCATCAGAGAATTCACAC	1.17	70779	0.0391	6663	1.07
ZNF519P1	1.1732	1.0653	1	CAGCATCAGAGAATTCACAC	1.17	70779	0.0391	6663	1.07
ZNF519P3	1.1732	1.0653	1	CAGCATCAGAGAATTCACAC	1.17	70779	0.0391	6663	1.07
ZNF519P2	1.1732	1.0653	1	CAGCATCAGAGAATTCACAC	1.17	70779	0.0391	6663	1.07
ZNF252P	1.1732	1.0653	1	CAGCATCAGAGAATTCACAC	1.17	70779	0.0391	6663	1.07
LOC100287610	1.1732	1.0653	1	CAGCATCAGAGAATTCACAC	1.17	70779	0.0391	6663	1.07
LOC643381	1.1732	1.0653	1	CAGCATCAGAGAATTCACAC	1.17	70779	0.0391	6663	1.07
LOC100419896	1.1732	1.0653	1	CAGCATCAGAGAATTCACAC	1.17	70779	0.0391	6663	1.07
LOC100419845	1.1732	1.0653	1	CAGCATCAGAGAATTCACAC	1.17	70779	0.0391	6663	1.07
LOC344065	1.1732	1.0653	1	CAGCATCAGAGAATTCACAC	1.17	70779	0.0391	6663	1.07
LOC105379522	1.1732	1.0653	1	CAGCATCAGAGAATTCACAC	1.17	70779	0.0391	6663	1.07
ZNF37BP	1.1732	1.0653	1	CAGCATCAGAGAATTCACAC	1.17	70779	0.0391	6663	1.07
ZNF720P1	1.1732	1.0653	1	CAGCATCAGAGAATTCACAC	1.17	70779	0.0391	6663	1.07
LOC101928592	1.1732	1.0653	1	CAGCATCAGAGAATTCACAC	1.17	70779	0.0391	6663	1.07
ZNF300P1	1.1732	1.0653	1	CAGCATCAGAGAATTCACAC	1.17	70779	0.0391	6663	1.07
NTN5	1.17173	1.94223	4	CCGCCAGGGCCAGTCTCGAT;GCAGTGCACCTGCAAGTTAG;CCTGGCCCCCAAACTCCACA;GAGCTGTTCAGACTGTCGGG	0.25;1.26;1.48;1.7	53455;71783;73824;75166	1.09E+00;1.56E+00;7.91E-01;5.18E-02	2276;3618;5659;23987	9.69E-01;1.92E+00;2.84E+00;2.04E+00
KCNMB4	1.16919	1.83469	4	GATGAAGAGCGACACGACGC;ACAACTCTGAGTCCAACTCT;CTGGACGCAGGGGTACTGCG;TTACGAGTACACGGAAGCCG	-0.15;1.0;1.59;2.23	43895;68515;74607;76803	7.34E-01;1.20E+00;8.83E-01;1.44E-02	639;2835;8927;33547	1.49E+00;2.13E+00;2.27E+00;1.45E+00
DYNLL1P3	1.1685	1.06199	1	AGAGATGCAACAGGACTCGG	1.17	70728	0.0394	6714	1.06
APOL4	1.16701	1.85695	4	ACATAACGCCAATGACAGAC;GAAGAATCTTACACCATATG;CTGGAAGAGATTTGTGCGTG;TGCAGCAAAACCATCCAGGC	0.19;1.07;1.44;1.96	52192;69517;73476;76210	1.03E+00;1.30E+00;7.57E-01;2.78E-02	1232;3966;7925;25250	1.22E+00;1.85E+00;2.41E+00;1.95E+00
UBE2Q1	1.16695	1.89744	4	CGATCACAGAGTTTCAAAGG;CTCGAGTCCATCTTCCACCG;GGCTGGTGGACATAAAGAAA;GACCGCATCTCCCCCCACGG	0.68;0.76;1.42;1.82	62838;64333;73271;75767	1.66E+00;9.26E-01;7.39E-01;3.80E-02	1675;4171;13109;14604	1.09E+00;1.81E+00;1.79E+00;2.90E+00
LOC729224	1.16605	1.44045	2	GGAGCCAAGAGTGATCGATG;TCAGCCAAGAGATACCTCCG	-0.4;2.73	38788;77237	3.01E-01;2.29E-03	205;38654	2.28E+00;6.04E-01
UROD	1.16415	2.02459	4	ACTGCCTTACATCCGTGATG;ATATCTGGTAGGACAAGTGG;CTGGGGTACAACAAGGATGT;GTGGACCCTGATGACATACA	0.76;1.18;1.3;1.43	64391;70819;72157;73388	1.80E+00;1.44E+00;6.56E-01;9.34E-02	4054;5285;6623;13051	7.49E-01;1.62E+00;2.64E+00;3.09E+00
DLST	1.15902	1.9514	4	TTCACACTCAGGAAAACTGG;AAGGTCTGCGTTCAGAACAT;GACAGATTCTGCAAACGCTG;TTGTGAGATTGAAACTGACA	0.53;1.24;1.24;1.63	59704;71593;71622;74795	1.43E+00;1.53E+00;6.24E-01;6.04E-02	2647;5820;5849;17738	9.09E-01;1.54E+00;2.80E+00;2.56E+00
PEX5	1.15468	2.49003	4	TCTTGTGAACTGGTCAACCC;TATCTGAACTCACCAGCGAT;GCTGAGGGTGATCACGCAAG;TAGCCATCAGTGCATTGCGG	-2.68;1.03;2.98;3.29	13075;68965;77322;77375	4.11E-01;1.24E+00;2.21E+00;1.48E-03	67;120;8477;64368	2.46E+00;4.85E+00;2.33E+00;3.21E-01
VEZF1	1.15433	1.82879	4	CCTTATCTCTACCATCGCTG;AACAAGGCATCAGTAAAAGT;TTGCCACCAAAGACAGACTG;ACCGGATGACTTACCATGTG	0.6;0.65;1.38;1.99	61142;62251;72956;76290	1.53E+00;8.26E-01;7.13E-01;2.60E-02	1152;4486;15191;16300	1.24E+00;1.75E+00;1.61E+00;2.71E+00
LOC107987221	1.15415	1.05069	1	CCCTCAGGAGCACCTGGAAG	1.15	70551	0.0405	6891	1.05
LOC105376070	1.15299	1.3032	2	CGCATTGACGCAATGCACGG;GGTTAAGATAGATATCCACT	0.55;1.76	60148;75470	4.60E-01;2.24E-02	1972;17294	1.30E+00;1.30E+00
LRRC37A16P	1.15217	1.30248	2	ACCTCCCTAGAAGACTCAGA;GCCGAGGCGGGCAGATCACG	0.56;1.75	60366;75411	4.64E-01;2.31E-02	2031;17076	1.29E+00;1.31E+00
TTC22	1.1514	2.00333	4	CTGGCAGGCGTACTGCACAA;GCGCTCTACGACAAGGCGCT;GGCCCGCGAGTGCTTCCTCG;CCTTGCCGAAGCAGTCTAGA	0.88;1.04;1.18;1.5	66646;69066;70831;73987	2.03E+00;1.25E+00;5.83E-01;7.93E-02	3455;6611;8376;10796	8.08E-01;1.44E+00;2.35E+00;3.42E+00
PLA2G4F	1.14977	1.9284	4	CTGAGGGCCACAAACATCCG;CTCACCGTACTCTTCCCGTG;CGTCCGCACCAACTTGAGTG;GTAGTACTGTAGCCGCTCCG	0.76;1.02;1.09;1.74	64394;68751;69720;75364	1.80E+00;1.23E+00;5.36E-01;4.72E-02	2078;7722;8691;13048	1.00E+00;1.32E+00;2.30E+00;3.09E+00
FKBP1C	1.14705	1.04505	1	GGCAAGCAGGAGGTGATCCG	1.15	70461	0.041	6981	1.05
SDCBP2-AS1	1.14705	1.04505	1	GGCAAGCAGGAGGTGATCCG	1.15	70461	0.041	6981	1.05
ZC3HC1	1.14432	1.75721	4	GGGTGATCCATTAACTGACT;ATGTTCGCAATGTATGAGGA;AGAGAATACAGGCAGTGACG;CCAGAAACAGAACTTCTCAT	0.29;0.93;0.96;2.4	54450;67371;67903;76999	1.13E+00;1.11E+00;4.79E-01;9.94E-03	443;9539;10071;22992	1.65E+00;1.15E+00;2.12E+00;2.11E+00
OR51E2	1.14105	1.88988	4	AATGTTTGGAAACTGCATCG;TGGTGGATTCAATGGCTGAG;GGAAAAAAAAGAGGGATCCG;GGACACAATAGGAGTGCGAG	0.64;0.92;1.37;1.63	62099;67261;72857;74827	1.60E+00;1.11E+00;7.05E-01;5.97E-02	2615;4585;10181;15343	9.14E-01;1.73E+00;2.10E+00;2.81E+00
DCLRE1A	1.13721	2.17011	5	AGGTGTCTGCCCTATCAATG;TGTTGAGAATGACAAACTAG;GTCTTCACAAAATCAGCTCA;ACGACATGGTCCCTTACTGA;GCCGAGGCGGGCAGATCACG	0.71;0.84;1.09;1.3;1.75	63411;65851;69792;72232;75411	2.36E+00;1.62E+00;1.15E+00;5.94E-01;5.77E-02	2031;5210;7650;11591;14031	9.28E-01;1.44E+00;2.11E+00;2.67E+00;3.71E+00
SLC6A8	1.13667	1.90877	4	GGCTGCTCACCTTTGAACAG;TGGCGCGTCCAGGTCTCGCG;TCTAGGTGTGGATAGATGCG;GGGCGTGCACATCTCCAAGG	-0.23;1.27;1.71;1.79	42302;71939;75221;75609	6.90E-01;1.58E+00;9.78E-01;4.16E-02	1833;2221;5503;35140	1.05E+00;2.33E+00;2.88E+00;1.37E+00
CSPG4	1.1359	1.99515	4	GCTCTGGCGATCCATCTCGG;AAACCCATCGACTGACAACG;TGGCCGTAGATGAGCCCACG;CCGCTGGTGGAACGCCTGTG	0.65;1.26;1.31;1.33	62272;71771;72275;72488	1.62E+00;1.56E+00;6.64E-01;1.15E-01	4954;5167;5671;15170	6.78E-01;1.63E+00;2.84E+00;2.83E+00
EFNB1	1.1358	1.85944	4	TGATCTTCATGGTGCGTGTG;GGTGACTCTGATGGCAAGCA;ATTGCAGGTGACCAACACGT;GAGTTCAGCCCCAACTACAT	-0.31;1.04;1.81;2.01	40507;69088;75698;76347	6.44E-01;1.26E+00;1.08E+00;2.47E-02	1095;1744;8354;36935	1.27E+00;2.54E+00;2.35E+00;1.29E+00
TCEAL8	1.13243	1.91119	4	TTAAAGAGGACACACCCGTT;CCTGTGGTACATCCTCCAAA;AAAACCACAGAACATGCCAA;AGAGGAGGGCCGAATCAGCC	0.64;1.07;1.28;1.54	61983;69533;72018;74217	1.59E+00;1.30E+00;6.47E-01;7.39E-02	3225;5424;7909;15459	8.34E-01;1.59E+00;2.42E+00;2.80E+00
PGP	1.13221	2.0115	4	GCGTGCGGCTGAGCGCCGAG;GCTTCTCGGCGTAGGCAGCG;ACGCTGCTGTTCGACTGCGA;ATGAAGCGGCCGTTCTCAAG	0.89;1.02;1.31;1.32	66778;68730;72288;72367	2.05E+00;1.22E+00;6.65E-01;1.18E-01	5075;5154;8712;10664	6.70E-01;1.64E+00;2.30E+00;3.44E+00
ADGRG7	1.1283	2.15882	5	TTTGGGTAATCAATCAGTGG;AGACAGTGCACATCCAACGT;CATCACTAGTGCTACGCGAG;ATTCCAATAGACACAGGCAT;GCCGAGGCGGGCAGATCACG	-0.06;1.12;1.41;1.43;1.75	45894;70083;73240;73412;75411	1.09E+00;2.15E+00;1.60E+00;6.78E-01;5.77E-02	2031;4030;4202;7359;31548	9.28E-01;1.64E+00;2.85E+00;3.43E+00;1.95E+00
ATG4A	1.12818	1.91145	4	TTCTATCTAAGAAGCACTGT;TGGTTTATGCCCAGGCGAAG;GAAGCAGTTAAAGAATCGGG;TGGGGATGTATGCTACGCTG	0.42;1.23;1.36;1.5	57395;71525;72741;73959	1.29E+00;1.52E+00;6.96E-01;7.99E-02	3483;4701;5917;20047	8.05E-01;1.71E+00;2.78E+00;2.35E+00
ATP5G1	1.12795	1.75045	4	ATTCACTGGGCTATTCAAGA;AATGTCCCGGGAGACAACAC;CAGCAACTTCCCACTCCAGG;CAGATCCGCTGTTGTACCAG	-0.1;0.84;1.57;2.2	44945;65960;74458;76743	7.66E-01;1.02E+00;8.63E-01;1.57E-02	699;2984;11482;32497	1.45E+00;2.08E+00;1.95E+00;1.51E+00
TCEAL5	1.12602	1.88311	4	GAAAGAAACCTAGAAAGTGA;CAAAAAGAAAAACCGACAGG;GAGGGAAACCAGGAAAAGCA;AGAATGCGAGGGAAAGCGAG	0.7;1.02;1.05;1.73	63375;68818;69161;75330	1.71E+00;1.23E+00;5.16E-01;4.80E-02	2112;8281;8624;14067	9.98E-01;1.26E+00;2.31E+00;2.96E+00
UBE2M	1.12478	1.85538	4	TCTCTGTCCACAGAGAGGAC;TCCCAGGGCTTCTACAAGAG;GCGCAGCTGCGGATCCAGAA;TCACCCCAACATTGACCTCG	0.0;1.2;1.57;1.73	47364;71035;74463;75319	8.44E-01;1.46E+00;8.64E-01;4.83E-02	2123;2979;6407;29836	9.96E-01;2.09E+00;2.68E+00;1.66E+00
OGFR	1.12473	1.63737	4	TGTGGGCCAGAGCATAGCAA;CCCCAGACGAACTTGCAGCG;CAGAAACTGGCGAGCCACGA;AGGAGTGATTGTCCTCAAGG	-0.02;0.5;1.21;2.81	46935;59083;71191;77272	8.29E-01;7.07E-01;6.01E-01;3.80E-03	170;6251;18359;30508	2.06E+00;1.48E+00;1.39E+00;1.62E+00
FMO4	1.12461	1.80036	4	TGCTGTGGAACTCAGTCGAA;TCATAGTGATTGCCCCACAG;CTTCGTTATGCTGCACACAG;TTCCAAAGATGGGATGACCA	0.55;0.68;1.4;1.86	60307;62889;73177;75901	1.47E+00;8.55E-01;7.31E-01;3.49E-02	1541;4265;14553;17135	1.13E+00;1.79E+00;1.67E+00;2.62E+00
SHOC2	1.11834	2.10367	5	CAAGGCAGGCAGATCACCTG;TAACATTTCTACTTTACCAG;TCATACCTATAGTATCTGGG;GAGCTACATCCAGCGTAATG;TAGTTATACGATTAAAGCGA	-0.53;1.13;1.3;1.48;2.21	36237;70272;72197;73811;76776	7.27E-01;2.19E+00;1.43E+00;7.13E-01;1.87E-02	666;3631;5245;7170;41205	1.38E+00;1.72E+00;2.57E+00;3.48E+00;1.37E+00
ACTL10	1.11417	1.79906	4	AGATGTGTGATGGCCTTGCG;AGAAGATGCCCAAAACGCTG;GGCCACCTTCCGACTGAACG;CACGCCACGCCCATCTACGC	0.4;1.04;1.16;1.85	56980;69091;70654;75876	1.27E+00;1.26E+00;5.75E-01;3.55E-02	1566;6788;8351;20462	1.12E+00;1.42E+00;2.35E+00;2.31E+00
HYAL2	1.11067	1.84585	4	GTCGTGTGAAGACGTAGACT;GGAGCACTACATTCGGACAC;CTTCCGGCAGAATCGAAGCG;GACGTGCCCACACAGGACTG	0.5;1.12;1.18;1.65	59122;70101;70841;74932	1.39E+00;1.35E+00;5.83E-01;5.72E-02	2510;6601;7341;18320	9.30E-01;1.44E+00;2.51E+00;2.50E+00
ZNF703	1.10285	1.94047	4	GGTCGCGGCATAATCCCTGC;AGGGAGACACCGGCGCCACG;AAGATGCTGAGCGCTCACAC;CACTCTGACTGCAAGAACGG	-1.44;1.19;1.61;3.05	24397;70960;74719;77339	3.93E-01;1.45E+00;8.99E-01;2.29E-03	103;2723;6482;53045	2.28E+00;2.16E+00;2.67E+00;6.57E-01
TMEM251	1.10231	1.96749	4	TTTCAAGGAGTGTGTCCATG;TGTCCACACCCAAAAAGGCA;ATAGTAAAATGCTGCTGCAC;ATGAACTTCCGTCAGCGGAT	0.96;0.98;1.06;1.41	67908;68188;69335;73186	2.18E+00;1.18E+00;5.22E-01;9.82E-02	4256;8107;9254;9534	7.32E-01;1.28E+00;2.22E+00;3.64E+00
HNRNPF	1.09838	1.87383	4	TGAAGCCGTAGCCATCACTG;GATAGGGCACAGGTACATTG;CCATTTCATCTACACTAGAG;ACTCCCATTTGGATGCACAA	-0.9;1.25;1.58;2.47	30397;71646;74528;77064	4.53E-01;1.54E+00;8.73E-01;8.48E-03	378;2914;5796;47045	1.72E+00;2.10E+00;2.81E+00;8.66E-01
B4GALT4-AS1	1.09832	1.25389	2	GAAAATCCCAAAGTGTCCAG;ACCCACGAAGTAGTTACTGG	0.27;1.92	54012;76105	3.75E-01;1.51E-02	1337;23430	1.47E+00;1.04E+00
SPOP	1.09791	1.7379	4	GTTTGTGCAAGGCAAAGACT;CAGATGAGTTAGGAGGACTG;TGTTTGCGAGTAAACCCCAA;ACAAGGCTATCTTAGCAGGT	0.15;1.02;1.23;1.98	51250;68846;71454;76276	9.90E-01;1.23E+00;6.15E-01;2.63E-02	1166;5988;8596;26192	1.24E+00;1.52E+00;2.31E+00;1.88E+00
STAT3	1.09764	1.84395	4	TCGGCCGGTGCTGTACAATG;AACATGGAAGAATCCAACAA;GAGACCGAGGTGTATCACCA;ACGCCGGTCTTGATGACGAG	0.13;1.3;1.34;1.62	50821;72184;72585;74759	9.72E-01;1.62E+00;6.85E-01;6.12E-02	2683;4857;5258;26621	9.04E-01;1.68E+00;2.93E+00;1.86E+00
STEAP3-AS1	1.09726	1.62157	4	GGCCTTGACCACTGTGCAAG;GTAGGCCACGCACGGCAGTG;AGCCACAAAGATGACCTCCG;GCCAGTGGTCCAGCCAGTCG	0.21;0.43;1.06;2.69	52656;57561;69271;77216	1.05E+00;6.61E-01;5.20E-01;5.05E-03	226;8171;19881;24786	1.94E+00;1.27E+00;1.30E+00;1.98E+00
STEAP3	1.09726	1.62157	4	GGCCTTGACCACTGTGCAAG;GTAGGCCACGCACGGCAGTG;AGCCACAAAGATGACCTCCG;GCCAGTGGTCCAGCCAGTCG	0.21;0.43;1.06;2.69	52656;57561;69271;77216	1.05E+00;6.61E-01;5.20E-01;5.05E-03	226;8171;19881;24786	1.94E+00;1.27E+00;1.30E+00;1.98E+00
LOC107986496	1.09492	1.00753	1	TCCTCCTCAGAGGACCTTCG	1.09	69831	0.0449	7611	1.01
TSPY12P	1.09307	1.00588	1	GTTGGATGACATAATGGCGG	1.09	69802	0.0451	7640	1.01
KISS1	1.09272	1.71632	4	AGAGCCTGCCGTGCACCGAG;CCCCAGAGGATACATACCTG;GGGACAGCGAGGTCCCCCGA;TTTCTAATGGCTCCCCAAAG	0.32;0.71;1.4;1.93	55226;63474;73175;76130	1.17E+00;8.82E-01;7.31E-01;2.97E-02	1312;4267;13968;22216	1.19E+00;1.79E+00;1.72E+00;2.17E+00
ANP32D	1.09214	1.74815	4	TCAAATGAAGGCAAATTGGA;CAGGAAAAGTTCTTTCACAT;TTATTAAATACAATCAACAT;AGCAGTAACAGAGCCTCAGT	-0.23;0.92;1.66;2.03	42146;67191;74974;76408	6.86E-01;1.10E+00;9.37E-01;2.33E-02	1034;2468;10251;35296	1.29E+00;2.24E+00;2.09E+00;1.37E+00
NUP54	1.09133	1.7672	4	CAACAATAATATTCCGCCAG;TTTGGTGGTACTCAGAACAA;TGGGCATATAGCGTTGTAGC;AGTTCCTTAAAACCCACCAT	0.35;0.78;1.56;1.68	55904;64764;74364;75078	1.21E+00;9.49E-01;8.52E-01;5.38E-02	2364;3078;12678;21538	9.54E-01;2.06E+00;1.83E+00;2.22E+00
PIGFP1	1.0897	1.00367	1	TATTGGAAACACACTTGACA	1.09	69763	0.0453	7679	1
B3GALT5	1.08836	1.85895	4	TTCATCACAAACGCCGCCTG;CAAGAAGCCAGTGAAAAACC;GACCTCATCCCACAAACAGT;CCAGGAGAGCCAGCGACACG	-0.52;1.38;1.48;2.01	36548;72955;73826;76348	5.56E-01;1.75E+00;7.91E-01;2.47E-02	1094;3616;4487;40894	1.27E+00;1.92E+00;3.14E+00;1.11E+00
ODAM	1.08624	1.74722	4	AGTTTACATGGTCCTACCCT;AGGCCTGACTTACGTGACTG;GTCTGCCAGCAATAGCAATG;GAAGCTGTAAGGGATCAACT	0.58;0.64;1.3;1.83	60729;62068;72242;75787	1.50E+00;8.18E-01;6.62E-01;3.75E-02	1655;5200;15374;16713	1.10E+00;1.63E+00;1.60E+00;2.66E+00
CDY3P	1.08525	0.999389	1	ATGACAAACAGGATGACACT	1.09	69687	0.0458	7755	0.999
LCMT2	1.08363	1.6575	4	TAGTAGCCTCGGTGAATGAG;AAGGGCATTAGGAAAACGCT;TTAACCGGGCCTTTCGAGAG;GGCGAAGCAGGATTTACGCG	0.22;0.62;1.29;2.21	52744;61696;72093;76764	1.05E+00;8.03E-01;6.52E-01;1.53E-02	678;5349;15746;24698	1.47E+00;1.61E+00;1.57E+00;1.99E+00
RPL17P34	1.08215	1.24069	2	TGGAGTTGGCAGGTGTGCGC;CATGAGCTCTGTAGGTCCGG	0.23;1.93	53073;76129	3.65E-01;1.48E-02	1313;24369	1.48E+00;1.00E+00
DSG1	1.08017	1.78395	4	GTAGCCATTGAAAACACTGG;GGATATTATCATTGACATCG;GAACAGTACAATATGCTCGG;ATGACAAAGATCCCATATGG	0.2;1.05;1.5;1.58	52367;69165;73936;74478	1.04E+00;1.26E+00;8.03E-01;6.78E-02	2964;3506;8277;25075	8.66E-01;1.95E+00;2.36E+00;1.96E+00
RBMY2MP	1.07964	1.36714	2	AATGCTGCCAAAGATATGAA;TGCCAAAGATATGAATGGAA	-0.46;2.62	37624;77171	3.01E-01;3.03E-03	271;39818	2.16E+00;5.78E-01
U2AF1L4	1.07763	2.33631	4	CGTGGGCAACGTCTATGTCA;TGTCGGCTTGTTGTGAAGCC;GTAAAAAGAGCAGTTAACCC;TGGCTGAACTCAGTAACCGC	-1.96;1.77;1.94;2.57	19927;75512;76146;77145	3.75E-01;2.45E+00;1.20E+00;6.65E-03	297;1296;1930;57515	1.82E+00;2.79E+00;4.22E+00;5.17E-01
HSPA12B	1.07754	1.66309	4	CTTGCGGCAGTATACCGAGG;GCAGAGCGGTCTCCACGTTG;GAAAGCATAGCCACTAGACG;GTCATGGTAGTAATCGCGGG	0.33;0.7;1.09;2.18	55451;63337;69788;76717	1.18E+00;8.76E-01;5.39E-01;1.63E-02	725;7654;14105;21991	1.44E+00;1.32E+00;1.70E+00;2.19E+00
PTMAP7	1.07387	0.990355	1	CAGCTCCGAAATCACCACCA	1.07	69524	0.0468	7918	0.99
PTMAP2	1.07387	0.990355	1	CAGCTCCGAAATCACCACCA	1.07	69524	0.0468	7918	0.99
PTMAP3	1.07387	0.990355	1	CAGCTCCGAAATCACCACCA	1.07	69524	0.0468	7918	0.99
LOC442727	1.07387	0.990355	1	CAGCTCCGAAATCACCACCA	1.07	69524	0.0468	7918	0.99
TSPY18P	1.07352	1.22153	2	CAGGATGGAGGCTGTACAGG;GACCCCAGAGTCTGCACTGG	0.44;1.71	57725;75225	4.21E-01;2.52E-02	2217;19717	1.25E+00;1.19E+00
TSPY19P	1.07352	1.22153	2	CAGGATGGAGGCTGTACAGG;GACCCCAGAGTCTGCACTGG	0.44;1.71	57725;75225	4.21E-01;2.52E-02	2217;19717	1.25E+00;1.19E+00
KIAA1191	1.0732	1.71348	4	CAGCTATGATGATACCCTCG;CAGGGTCAGATACCTTGGCG;GCTGGCTACACACCCCACAA;ACTAAAGTTACAGAGTGGAG	0.52;0.83;0.88;2.07	59649;65629;66533;76487	1.43E+00;9.99E-01;4.47E-01;2.15E-02	955;10909;11813;17793	1.32E+00;1.06E+00;1.92E+00;2.55E+00
IRF9	1.0729	1.71856	4	AACTGAGGCCCCCTTTCAAG;AATTTAAGGAGGTTCCTGAG;ACAATTCCACAGGCCAGCCA;CTTCATCTACAACGGGCGCG	0.34;0.69;1.51;1.75	55618;63101;74041;75413	1.19E+00;8.65E-01;8.14E-01;4.61E-02	2029;3401;14341;21824	1.01E+00;1.98E+00;1.68E+00;2.20E+00
OR4N3P	1.0701	0.987949	1	GCCCAGAAATAAATAGAGGG	1.07	69480	0.0471	7962	0.988
LOC107987216	1.0701	0.987949	1	GCCCAGAAATAAATAGAGGG	1.07	69480	0.0471	7962	0.988
NXT2	1.06916	1.86742	4	GGCAATCTAACATATTGACC;CAATATTTACTATGAGACAA;ATTTCCATTCCATATTAAGG;CACAACAAGAACTGTAGTTT	0.76;0.99;1.17;1.35	64492;68309;70789;72700	1.81E+00;1.19E+00;5.81E-01;1.10E-01	4742;6653;9133;12950	6.93E-01;1.43E+00;2.24E+00;3.11E+00
LINC01621	1.06881	1.21758	2	AAGGAACTATTCTTCATGCT;AGGACATACAGGTACTTGAA	0.44;1.7	57721;75184	4.21E-01;2.57E-02	2258;19721	1.25E+00;1.19E+00
LOC107986769	1.06749	0.985338	1	ACATGTGAAGGGTCGTAGAG	1.07	69432	0.0474	8010	0.985
MUSTN1	1.06719	1.54803	4	CCTCCTCCCACAGAGCAAGC;GGTCCTCGTCCTTCACAGGG;ACACTCTCGCATGACCTGGT;GGGGCGCTTCTTCTTGATAG	-0.14;0.49;0.94;2.97	44194;59002;67596;77321	7.43E-01;7.05E-01;4.71E-01;2.69E-03	121;9846;18440;33248	2.21E+00;1.13E+00;1.39E+00;1.47E+00
MGME1	1.06331	2.02642	5	GGAAAGCATACTTTCACCCC;CGTCGCCCAGACCCCGGGAT;CAGCGGATGATTCTGGAACT;GCCGAGGCGGGCAGATCACG;AGGAAGTAGAGAAAGCCACA	-1.56;-0.38;1.71;1.75;3.8	23355;39103;75217;75411;77410	4.45E-01;5.10E-01;2.12E+00;9.29E-01;8.69E-04	32;2031;2225;38339;54089	2.69E+00;2.20E+00;3.65E+00;8.19E-01;7.79E-01
LOC105375215	1.06122	1.21116	2	CATAGTCACAAACATAACAA;GCCGAGGCGGGCAGATCACG	0.38;1.75	56370;75411	4.02E-01;2.31E-02	2031;21072	1.29E+00;1.13E+00
LOC105370035	1.05867	1.23464	2	CTTGCTGCAGTAGAATGACG;TCAGCCATGTAATCAAACAA	0.7;1.42	63216;73329	5.23E-01;4.74E-02	4113;14226	9.97E-01;1.47E+00
HOXB-AS1	1.05756	0.978187	1	GAAATGTCTCCAAGACAGCG	1.06	69299	0.0482	8143	0.978
SMAD5	1.05739	1.52009	4	GATATACTGGGCATAATCTG;TCATCAGGTGGCATATAGGC;GGATTGAATTCATTATGACG;GTGGAAAGAATCTGGAAACG	-0.29;0.51;0.71;3.3	40869;59475;63548;77377	6.53E-01;7.20E-01;4.02E-01;1.44E-03	65;13894;17967;36573	2.48E+00;8.86E-01;1.42E+00;1.30E+00
C9orf64	1.05729	1.66361	4	TGACAGCGGAGGCGTACGGA;GGTCACTGTCGCGTAGTACG;TACAGAGGGAAAACATACAG;AAATCCTTGTAGCAGATACG	-0.44;0.12;1.81;2.74	37944;50503;75697;77242	5.85E-01;5.10E-01;1.08E+00;4.47E-03	200;1745;26939;39498	1.99E+00;2.54E+00;9.59E-01;1.17E+00
ACVR2B	1.05672	1.53898	4	ATGACTTCAACTGCTACGAT;ACAAGCCGTCTATTGCCCAC;ATGTCCACATGACCGTAGGG;CTGGAGCGCACCAACCAGAG	-0.39;0.57;0.92;3.12	38914;60658;67277;77353	6.06E-01;7.62E-01;4.63E-01;1.98E-03	89;10165;16784;38528	2.34E+00;1.11E+00;1.50E+00;1.21E+00
LOC107986346	1.05631	0.977387	1	TGACCCAGGTAAATCACAAG	1.06	69284	0.0483	8158	0.977
MCTS1	1.053	1.69538	4	CAATTGATAGAGCAATTTCC;TTGTGAAGTAATCTTAGGGT;ATCCTGTCAAAATAGTCCGA;GGAGCAAATATCATGTGTCC	0.44;0.62;1.44;1.72	57768;61586;73487;75265	1.31E+00;7.98E-01;7.58E-01;4.95E-02	2177;3955;15856;19674	9.86E-01;1.85E+00;1.56E+00;2.38E+00
LRRN1	1.05219	1.74754	4	GCACTTGTGTGTCACTAGAG;GAGTTCAGGCAAGTTATCCA;CTTCCCAAATCGTTTAAACG;TAGACAGTAATCAGTCATCT	-0.21;1.21;1.44;1.77	42704;71185;73488;75509	7.01E-01;1.48E+00;7.58E-01;4.39E-02	1933;3954;6257;34738	1.03E+00;1.85E+00;2.71E+00;1.39E+00
LOC107986007	1.05219	1.74754	4	GCACTTGTGTGTCACTAGAG;GAGTTCAGGCAAGTTATCCA;CTTCCCAAATCGTTTAAACG;TAGACAGTAATCAGTCATCT	-0.21;1.21;1.44;1.77	42704;71185;73488;75509	7.01E-01;1.48E+00;7.58E-01;4.39E-02	1933;3954;6257;34738	1.03E+00;1.85E+00;2.71E+00;1.39E+00
RLIM	1.05023	1.76149	4	TCTTCAGACACAGCTGCCAG;TCCCACCTACCAGAGGTCAG;CCCGGCACCATGTGACATTG;GTCACCTATGAAAGTGAACG	0.54;0.86;1.36;1.44	59992;66251;72744;73515	1.45E+00;1.04E+00;6.97E-01;9.04E-02	3927;4698;11191;17450	7.61E-01;1.71E+00;1.99E+00;2.59E+00
C1orf137	1.04861	1.72799	4	GCTCATGGAGTATCCAAATG;TTTCCTGAGGCAGTGAGCCA;ACTGCCTCAGGAAACCAACC;TTTGTTGGCCACATCTACGG	0.56;0.87;1.11;1.66	60351;66402;69999;74995	1.47E+00;1.05E+00;5.47E-01;5.58E-02	2447;7443;11040;17091	9.40E-01;1.34E+00;2.00E+00;2.62E+00
ZNF658B	1.04801	1.28441	2	GCAGAGATGGAACTCTGTGG;CAGCATCAGAGAATTCACAC	0.92;1.17	67297;70779	6.43E-01;7.81E-02	6663;10145	8.03E-01;1.77E+00
PABPC4L	1.04722	1.47406	4	CAGCTGCAAGAAGTTCACGT;CTCAGCGCGATGCCTACTTG;GCTTTGGCCCGGTTCAAGTG;TCCAGGGGACAAACTCACAG	-0.42;0.36;0.62;3.63	38365;55991;61628;77403	5.94E-01;6.19E-01;3.85E-01;8.53E-04	39;15814;21451;39077	2.70E+00;8.00E-01;1.21E+00;1.19E+00
FOXL1	1.04661	1.74597	4	GGACCGTACAGATACAGCAT;TTCTACCACGACAACCGGCA;GCGTCCCCGAACGAGGACGC;GCTGTAGGGAGGCTTCTGCG	-0.16;1.14;1.55;1.66	43700;70369;74318;74973	7.29E-01;1.38E+00;8.46E-01;5.63E-02	2469;3124;7073;33742	9.37E-01;2.05E+00;2.56E+00;1.44E+00
RDH14	1.0456	1.7135	4	ATGTCTTGATCAATAACGCA;GAAACTACCACAATCCTGCT;GCACAGTCTTCCCGTGCATG;AGTTCGGAGTGAACCATCTG	0.26;0.83;1.54;1.55	53689;65767;74223;74315	1.10E+00;1.01E+00;8.35E-01;7.16E-02	3127;3219;11675;23753	8.45E-01;2.02E+00;1.93E+00;2.05E+00
TNNC1	1.04109	1.55124	4	GTGCTCACTTGTCAAACATG;GCTGCAGGAGATGATCGATG;TGCACCGAACCATCATGACC;TGCATGAAGGACGACAGCAA	-0.19;0.7;0.97;2.68	43117;63349;68026;77208	7.12E-01;8.76E-01;4.82E-01;5.23E-03	234;9416;14093;34324	1.92E+00;1.16E+00;1.71E+00;1.41E+00
EXOC3L4	1.03719	1.73316	4	AGGACCCTACGGCCTTCGCG;GACTCACCTGCCGTAGACGT;TTGCCGTTCAGTAATGAGGT;ATATGGACGTCCATGGACAG	0.71;0.77;0.96;1.7	63546;64611;67919;75192	1.72E+00;9.41E-01;4.79E-01;5.12E-02	2250;9523;12831;13896	9.73E-01;1.16E+00;1.82E+00;2.98E+00
TIMM8A	1.03654	1.79161	4	CTCAACGCAGTTCACAAAAC;TGACTGAACTTTGTTGGGTG;GCAGTTGCAGCATTTCATCG;CACTGCACCCAAACCCGCCG	-0.6;1.1;1.81;1.85	35028;69865;75694;75860	5.27E-01;1.33E+00;1.07E+00;3.58E-02	1582;1748;7577;42414	1.11E+00;2.53E+00;2.47E+00;1.05E+00
NLRP13	1.03554	1.90815	5	AAGTTTGCCCAGGGGATACG;ATATATCCGTAATACATCAA;ATGGCTCGCCATGTACAGAC;GCCGAGGCGGGCAGATCACG;AGAGCTGCAAGATCCAACCC	-0.18;0.28;1.46;1.75;1.87	43263;54312;73615;75411;75951	9.75E-01;8.83E-01;1.68E+00;9.29E-01;4.22E-02	1491;2031;3827;23130;34179	1.05E+00;2.20E+00;2.96E+00;1.55E+00;1.78E+00
COL11A2	1.03234	1.99072	5	CAAGGCAGGCAGATCACCTG;CTGGACCCATTGGTCCTGTG;AGGATACCCAGGACCTCGAG;TCACTGCTAGACTTACCGCA;GGAAACCCGTTGGGACCCTG	-0.53;-0.36;1.74;1.82;2.5	36237;39471;75371;75758;77093	7.27E-01;5.14E-01;2.18E+00;1.00E+00;9.78E-03	349;1684;2071;37971;41205	1.65E+00;2.35E+00;3.74E+00;8.32E-01;1.37E+00
DEFB127	1.03115	1.77155	4	ATACTGTTGCCTCAATATCA;CAGAGTAAATGAAGTGCCTG;CCAGCACTTCTTAAGTTGTT;TGCTGGAATAACTATGTACA	0.7;0.89;1.11;1.43	63275;66717;70049;73370	1.70E+00;1.07E+00;5.49E-01;9.38E-02	4072;7393;10725;14167	7.47E-01;1.35E+00;2.04E+00;2.95E+00
CACNG7	1.03009	1.71438	4	CATCTCCAGCATCAACGACG;AGCAGCGTGTTTGGTGCGTG;CAATTTGGTGACGGAAAACA;CAAAGAAGCAGACTCGCCAG	0.37;0.98;1.28;1.49	56305;68145;71964;73912	1.23E+00;1.17E+00;6.44E-01;8.10E-02	3530;5478;9297;21137	8.00E-01;1.59E+00;2.22E+00;2.26E+00
OGDH	1.02964	1.7076	4	GATCATGCAGTTCACAAATG;TTCCTGTCCCCCGATGAAAG;GTTGGCCACTCATAGATACG;GACTAGTTCGAACTATGTGG	0.57;0.8;1.19;1.56	60629;65189;70950;74359	1.49E+00;9.73E-01;5.89E-01;7.06E-02	3083;6492;12253;16813	8.51E-01;1.45E+00;1.88E+00;2.65E+00
ZNF561	1.02952	2.08882	4	AAAGTCTTTACTCTAACTCC;TGACTGTAAGAATTGTGGAG;CACACAAGTGTACTTACTGT;GTGGAGGACTACCTGGCAAG	-1.92;0.25;2.8;2.99	20255;53614;77264;77328	3.75E-01;5.65E-01;2.04E+00;2.54E-03	114;178;23828;57187	2.23E+00;4.50E+00;1.09E+00;5.27E-01
PLPP4	1.02812	1.87018	5	CTATTAAATTAATAGTGGGA;ACCACACAAATAACAGCCAG;GGCCCTCGGACACCAGATCG;AGTAGAACGTCGTGAAGCCA;GCCGAGGCGGGCAGATCACG	0.31;0.54;0.89;1.65;1.75	54898;60081;66818;74919;75411	1.59E+00;1.17E+00;9.18E-01;8.46E-01;5.77E-02	2031;2523;10624;17361;22544	9.28E-01;2.02E+00;1.72E+00;2.01E+00;2.68E+00
FAM240A	1.0262	1.8074	5	GACTTACTACCGAGAATCAG;GAAATGCTTGAGATCATGGC;CAATCAATACACCCGTCGGG;GCCGAGGCGGGCAGATCACG;TGTCTTCACATCCCTTCATG	0.14;0.16;0.97;1.75;2.12	51052;51340;67973;75411;76596	1.35E+00;7.74E-01;9.95E-01;9.29E-01;2.38E-02	846;2031;9469;26101;26390	1.28E+00;2.20E+00;1.85E+00;1.37E+00;2.34E+00
METTL15	1.02329	1.89549	5	GCTGCTGGGTTCTGGTGATG;TTGGACATGAGAATGGATGG;TATCCTAAGAACATACGGGG;GCCGAGGCGGGCAGATCACG;TTGAGATCTGTGTAACTCCT	-0.87;0.79;1.1;1.75;2.35	30931;64984;69868;75411;76943	5.85E-01;1.53E+00;1.15E+00;9.29E-01;1.40E-02	499;2031;7574;12458;46511	1.50E+00;2.20E+00;2.12E+00;2.55E+00;1.11E+00
EXTL3	1.02142	1.90196	5	GGTCATCGTAGTCGGCGGGA;AACCAAGCGAGGGTCCCCGG;CAGTCAGAGTGAAATTGCGG;AAATGAACCTCGGTAACACG;GCCGAGGCGGGCAGATCACG	-0.18;0.76;1.34;1.44;1.75	43268;64493;72614;73455;75411	9.75E-01;1.49E+00;1.49E+00;6.81E-01;5.77E-02	2031;3987;4828;12949;34174	9.28E-01;1.65E+00;2.67E+00;2.49E+00;1.78E+00
HPN-AS1	1.02128	1.8135	5	TGGTCTTTGACAAGACGGAA;GAAAGGGAAGATAGCCCCCG;AGAGCAGGGATCCCCCACAG;GCCGAGGCGGGCAGATCACG;GGCGGGCGCCAATGGCACGT	0.28;0.44;0.57;1.75;2.06	54287;57904;60631;75411;76474	1.55E+00;1.05E+00;6.46E-01;9.29E-01;2.73E-02	968;2031;16811;19538;23155	1.23E+00;2.20E+00;1.20E+00;1.82E+00;2.62E+00
NLGN3	1.01955	1.7533	4	GACCCGCCGTAAAACACTGG;TCTTCGGCAAAAGAGTGCCA;GGACTTAGCGGATAATGACG;AGTGATGTGACAACGTGAGG	0.7;0.84;1.14;1.39	63254;65967;70387;73092	1.70E+00;1.02E+00;5.63E-01;1.00E-01	4350;7055;11475;14188	7.24E-01;1.39E+00;1.96E+00;2.95E+00
MMP13	1.01848	1.62005	4	AGTGGTCAAGACCTAAGGAG;CTACCATCCTACAAATCTCG;GATGCCATTACCAGTCTCCG;AAAATTCAGAGGAGTTACAT	-0.06;0.93;1.31;1.89	45997;67335;72357;76014	7.98E-01;1.11E+00;6.69E-01;3.23E-02	1428;5085;10107;31445	1.16E+00;1.65E+00;2.11E+00;1.57E+00
GAS1	1.01815	1.64371	4	CTCAACGACTGCGTGTGCGA;AGCCGCTACCTGACCTACTG;CAGCTCAACCACACGCGCCG;CGCCTACAACCAGTACGCCG	0.3;0.92;1.08;1.77	54752;67245;69584;75536	1.15E+00;1.11E+00;5.31E-01;4.33E-02	1906;7858;10197;22690	1.04E+00;1.30E+00;2.10E+00;2.13E+00
C1orf158	1.01737	1.60676	4	ACTTCTGTCCATTCCAAGTG;GTGCTGATCAGGTAGCGATG;GACGACCATTACAACCGGCA;TGCCAGCTCGGAGTAGAGAG	0.01;0.44;1.63;1.98	48055;57840;74820;76266	8.68E-01;6.69E-01;9.13E-01;2.66E-02	1176;2622;19602;29387	1.24E+00;2.19E+00;1.31E+00;1.68E+00
SNX12	1.01736	1.65122	4	GCGGCTTCGAGTTAAGGCGC;TAAAGGAGTCCTGCGTACGG;ACTTGGCGGCCCGTAAGCGT;CCACCTATGAGGTTCGCATG	0.48;0.69;1.21;1.68	58788;63169;71234;75090	1.37E+00;8.68E-01;6.03E-01;5.36E-02	2352;6208;14273;18654	9.56E-01;1.49E+00;1.69E+00;2.47E+00
ISOC2	1.01612	1.61939	4	CTGACGGAGCAGTACCCACA;CCCTGGACCTCCTAGACCGG;CCAACCCCGGATAAGAACGG;GAGGTCATACCTTGAGCATG	0.2;0.77;1.32;1.77	52303;64623;72448;75550	1.03E+00;9.41E-01;6.75E-01;4.29E-02	1892;4994;12819;25139	1.04E+00;1.66E+00;1.82E+00;1.95E+00
SPERT	1.01244	1.74356	4	CCTAGAAATTCCAATCAGTG;CATGGGGTCTAAAGGCACGG;CTATACCTGGCAACTCACAT;AGGAGGAGAACAAGTCTCTG	0.66;0.88;1.13;1.37	62524;66665;70290;72861	1.64E+00;1.07E+00;5.59E-01;1.06E-01	4581;7152;10777;14918	7.05E-01;1.38E+00;2.03E+00;2.86E+00
PHGR1	1.00879	1.58128	4	CACCCCCCCACCATGGTCCA;CCACAGTGGCAGTGCCCCTG;GATGGCCATGCCCCCCACAG;GGCCATCCTCCAGGTCACTG	-0.14;0.53;1.58;2.07	44074;59757;74513;76498	7.40E-01;7.30E-01;8.71E-01;2.13E-02	944;2929;17685;33368	1.33E+00;2.10E+00;1.43E+00;1.46E+00
SCO2	1.00783	1.66598	4	CGCTGCAAGGCTGACTTCCG;AAGCCAGGACCTCAGATGCA;GGGTCCACAGTGATGAAGAC;GCTGATCACAGGCCTGTTCG	0.35;0.85;1.33;1.5	55890;66106;72510;73919	1.21E+00;1.03E+00;6.80E-01;8.09E-02	3523;4932;11336;21552	8.01E-01;1.67E+00;1.97E+00;2.22E+00
FAM46D	1.00767	1.69543	4	TTACGTACAGAAATTGGTCA;AAAGGGGAATTTCCCCACAA;TCACTGTAGAAGTCTAACAT;AACACAAGCTCATATGTACC	0.7;0.75;0.95;1.64	63220;64215;67666;74859	1.69E+00;9.20E-01;4.73E-01;5.89E-02	2583;9776;13227;14222	9.19E-01;1.14E+00;1.78E+00;2.94E+00
NXF5	1.00723	1.70194	4	ATGCCCGATTTCGGATGTAG;TTATGGGATAAAGTATGACA;CTGACCTTACATAGGCAGAC;CAACAACAAACTGTACCAGC	0.62;0.75;1.22;1.44	61773;64201;71293;73478	1.58E+00;9.19E-01;6.06E-01;9.13E-02	3964;6149;13241;15669	7.57E-01;1.49E+00;1.78E+00;2.78E+00
ALG1L7P	1.00517	0.941194	1	GTCCTCGGCCCTCCAGCCAG	1.01	68575	0.0528	8867	0.941
DEFB4A	1.00427	1.98656	6	ATATTCCTGATGCCTCTTCC;GAGGCATCAGGAATATGAAG;CCTGTTACCTGCCTTAAGAG;GCTCCCAGCCATCAGCCATG;GCAAAAGACTGGATGACATA;TCTCACCTGGAAGAGGCATC	-0.16;0.35;0.66;1.43;1.76;1.99	43752;55685;62517;73435;75455;76286	1.28E+00;1.32E+00;1.12E+00;1.49E+00;8.69E-01;3.92E-02	1156;1987;4007;14925;21757;33690	1.08E+00;2.05E+00;2.63E+00;1.87E+00;2.12E+00;2.17E+00
CCDC113	1.00407	1.85294	5	AGGATGACTTACGACACACA;TCCCGGACAGGTATGGACCG;TCTGCCAACTTACCCTCCGG;TTAATTTCTGATAATCGTGG;GCCGAGGCGGGCAGATCACG	0.36;0.63;1.08;1.21;1.75	55972;61896;69555;71167;75411	1.67E+00;1.29E+00;1.12E+00;5.39E-01;5.77E-02	2031;6275;7887;15546;21469	9.28E-01;1.29E+00;2.07E+00;2.19E+00;2.79E+00
PEX3	1.00321	1.5105	4	TCACAGCTCTGCTAAAAAAC;AATTGGTGGATATATTTACC;TTGTAGGAGTATATATTCTG;ATTAAGGCCTCTCTCAGTGT	-0.63;0.28;1.26;3.1	34664;54111;71815;77351	5.20E-01;5.75E-01;6.35E-01;2.02E-03	91;5627;23331;42778	2.33E+00;1.56E+00;1.12E+00;1.03E+00
MUM1L1	1.00115	1.61397	4	AAAGTATCAGACGAAAAGAG;TCATAATGTAAAATGAAGCG;CTCATTAGGACTACAGTCAG;TTGTGATTTATCATCATACA	0.53;0.66;0.87;1.94	59890;62486;66428;76140	1.44E+00;8.37E-01;4.45E-01;2.94E-02	1302;11014;14956;17552	1.19E+00;1.05E+00;1.63E+00;2.58E+00
CACNG6	1.00047	1.68474	4	CGTGGGCACCGAGTTCTGGG;GATGCGTGCATTCTCCCCCG;TGTGGAAGGCGTGCACCAAG;GATGATACAGAGGCACCCCA	0.64;0.68;1.2;1.48	62140;62862;71126;73766	1.61E+00;8.54E-01;5.97E-01;8.45E-02	3676;6316;14580;15302	7.85E-01;1.47E+00;1.66E+00;2.82E+00
ISOC1	0.998957	1.61004	4	GCCCCGTGTGGCACCGACGA;AGCACCGGGACTGTGCCCGA;GTAACAGAACAATACCCTAA;TTTGGGGATATTATTAGCGT	0.42;0.81;0.83;1.93	57484;65392;65728;76108	1.29E+00;9.85E-01;4.32E-01;3.02E-02	1334;11714;12050;19958	1.18E+00;1.00E+00;1.90E+00;2.36E+00
LOC107984305	0.996286	1.1516	2	GATCAATGTAATGAACCGTG;TCAATGCAGTGAATGAACAC	0.36;1.63	56106;74815	3.99E-01;3.00E-02	2627;21336	1.18E+00;1.12E+00
ZHX3	0.995301	1.74013	5	GTGATCGTAGATACCACTGC;GCTGTCGACTGGAGAAATGG;TCCATGGCTGCATTGTACGT;GCCGAGGCGGGCAGATCACG;CAATGCCACATGTCACTCCG	-0.41;0.38;0.97;1.75;2.3	38480;56363;67993;75411;76887	7.98E-01;9.71E-01;9.97E-01;9.29E-01;1.56E-02	555;2031;9449;21079;38962	1.46E+00;2.20E+00;1.85E+00;1.70E+00;1.49E+00
HASPIN	0.995234	1.61153	4	GCAGCCTCAGCCGTCCCGAG;GTCTGTCAAGCACAGGCAAG;GCTTAGCAAATACATAGAGG;TGGAGAGAACTAGATCAAGC	-0.42;0.92;1.45;2.04	38215;67220;73588;76419	5.91E-01;1.10E+00;7.68E-01;2.31E-02	1023;3854;10222;39227	1.29E+00;1.87E+00;2.10E+00;1.18E+00
ING5	0.995172	2.01875	6	CAAGGCAGGCAGATCACCTG;CTGGACCAGAGGACGGAAGG;GGCTGCAGAGTACATCTCCA;AAGTTCCTCTGAAGTTCGCA;GCCGAGGCGGGCAGATCACG;AAAGAAAAAAGAGGGTCCCG	-0.53;0.33;0.88;1.52;1.75;2.03	36237;55315;66518;74134;75411;76405	9.22E-01;1.29E+00;1.45E+00;1.64E+00;8.61E-01;3.51E-02	1037;2031;3308;10924;22127;41205	1.12E+00;2.03E+00;2.86E+00;2.36E+00;2.09E+00;1.64E+00
EIF1AXP1	0.993614	1.15857	2	GTAGGTTTGGATAAATACCT;AAGAGGTTATGTCACATCAG	0.55;1.44	60172;73489	4.60E-01;4.55E-02	3953;17270	1.01E+00;1.30E+00
CROT	0.993408	1.49087	4	GGAGATCCAACAGTACGCTG;CTCGACACAGCACTACAATG;TGGTATACGAACATCCAGAT;GATTGCAGCATTAACTAGTG	-0.1;0.15;1.25;2.67	45064;51271;71716;77200	7.69E-01;5.22E-01;6.29E-01;5.41E-03	242;5726;26171;32378	1.91E+00;1.55E+00;9.91E-01;1.51E+00
C14orf2	0.98916	1.62099	4	TGGTGTAGTAGGGCTTCATG;CCAAATCTCCTGGTAAACTT;CCATTCCTATCCAAATCTCC;CTTCATCGTTTATAAAATCC	-0.26;-0.01;1.92;2.31	41631;47032;76089;76896	6.72E-01;4.67E-01;1.18E+00;1.23E-02	546;1353;30410;35811	1.56E+00;2.75E+00;8.32E-01;1.34E+00
LOC105377982	0.987135	1.14651	2	AAAACTGGTACGTGATGCTA;GCCGAGGCGGGCAGATCACG	0.23;1.75	52988;75411	3.64E-01;2.31E-02	2031;24454	1.29E+00;1.00E+00
ARF1	0.984288	1.55821	4	AGGCTTCAACGTGGAAACCG;CACCCAGCTTAAGCTTGTAG;TGGAAGTAGTGGCGCCACAG;TGACAGAGAGCGTGTGAACG	-0.31;0.59;1.56;2.09	40487;61048;74404;76555	6.44E-01;7.77E-01;8.57E-01;2.00E-02	887;3038;16394;36955	1.35E+00;2.07E+00;1.52E+00;1.29E+00
ZNF280C	0.983025	1.76319	4	TTTACTGTTTGACTCGACCC;TACAAGATGAAATCTAGGCG;GAAGTGGAGGGATTTATCTG;GAGTGTGTGTACTCTCAATG	0.61;1.06;1.13;1.13	61356;69388;70227;70311	1.55E+00;1.28E+00;5.56E-01;1.68E-01	7131;7215;8054;16086	5.60E-01;1.37E+00;2.39E+00;2.73E+00
LOC105370041	0.982918	0.924664	1	TCATAAGCAGGAGAAACACC	0.98	68231	0.055	9211	0.925
PRRC2C	0.981978	1.60814	4	CATCATTCGAGGATCCATGT;TCTAAATCAGAAACTCGTTG;GGAAAAACAACCATCTCCAG;CTTAGCCGTCTAAATCGAGG	0.18;0.75;1.47;1.53	51788;64171;73738;74187	1.01E+00;9.17E-01;7.82E-01;7.46E-02	3255;3704;13271;25654	8.30E-01;1.91E+00;1.78E+00;1.92E+00
OR2M1P	0.980015	0.922407	1	GAAGGCCATCTTGGGTACGG	0.98	68183	0.0553	9259	0.922
PNMA8A	0.977955	1.6077	4	TGCCATCTCCTCGAATTCAG;CTGCGAACCAAAGGTTTGGT;CACGCGGTACGGGCCCAGTG;GGTCTGTAGAGACCCTACCC	0.05;0.96;1.31;1.59	48839;67882;72321;74579	8.96E-01;1.15E+00;6.67E-01;6.54E-02	2863;5121;9560;28603	8.79E-01;1.64E+00;2.18E+00;1.73E+00
ZCCHC12	0.976575	1.49406	4	GAAAATCCTTAAGTCTGAGT;GACCAACCCTAACCTAAGTG;ACTGCCGATCACTATCGGTG;ACATGAAGTTGTTCTCGGGG	-0.25;0.62;1.21;2.33	41729;61754;71166;76919	6.75E-01;8.05E-01;5.99E-01;1.17E-02	523;6276;15688;35713	1.58E+00;1.48E+00;1.58E+00;1.34E+00
LPAR3	0.976567	1.53684	4	AGAGGCACATGTCAATCATG;GGTACACCACAACCATGATG;CTGATGGACCCACTTGTATG;TTCTAATTCTCTGGTCATCG	-0.39;0.63;1.46;2.2	38892;61916;73661;76750	6.06E-01;8.12E-01;7.75E-01;1.56E-02	692;3781;15526;38550	1.46E+00;1.89E+00;1.59E+00;1.21E+00
TOR1AIP1	0.976269	1.68196	4	GACGGAGGAGTTCTGTACGC;AAACTGCAAGAATAAGGACC;AACTGTCAGGAGCATACAAG;GGCCAAAGAAAGGTCCCCGG	-1.35;1.03;1.17;3.06	25288;68904;70707;77344	3.99E-01;1.24E+00;5.77E-01;2.18E-03	98;6735;8538;52155	2.30E+00;1.42E+00;2.32E+00;6.87E-01
TRPM4	0.972763	1.77753	5	GCCGAGTAGTTGTAGTCCAG;CCAGAGTGAACTCTTTCGGG;AAGAAGCAGGTCGCTCCAGG;CGAGTGCTATCGCAGCAGTG;GCCGAGGCGGGCAGATCACG	0.29;0.64;0.83;1.36;1.75	54554;62056;65641;72726;75411	1.57E+00;1.30E+00;8.50E-01;6.26E-01;5.77E-02	2031;4716;11801;15386;22888	9.28E-01;1.51E+00;1.59E+00;2.20E+00;2.65E+00
OXCT2P1	0.971832	1.15173	2	CGTAGGAACAGACGATGCGA;GCTCATGAGCCAGCCCCGAG	0.63;1.31	61850;72359	4.93E-01;5.90E-02	5083;15592	9.11E-01;1.39E+00
CSK	0.971506	2.12583	4	TGATGCTGGGCGATTACCGA;CATTAAACCAAAGGTCATGG;TCTTGCCGTGGAACCAACTG;CGCACAGCGTGTAGTCTCCG	-1.75;1.59;2.0;2.04	21783;74582;76327;76430	3.79E-01;2.12E+00;1.26E+00;2.28E-02	1012;1115;2860;55659	1.30E+00;2.92E+00;3.71E+00;5.74E-01
KCNA2	0.97147	1.55718	4	TATAGCTATTGTGTCTGTCA;GATGAGAATGAAGACATGCA;AGATGAAGGCTACATCAAGG;AAATGGCATCAAAGCTAGGG	0.39;0.63;1.06;1.8	56744;61926;69321;75676	1.25E+00;8.12E-01;5.22E-01;4.01E-02	1766;8121;15516;20698	1.07E+00;1.28E+00;1.59E+00;2.29E+00
PEX13	0.971072	1.48412	4	TGGCCTTGGAAGAATAGGTG;TGCTGAACAAATCTACTGGG;AAATGAGGTAAGGACCACCA;ATCTTTACAGACGGCTACAG	-0.29;0.35;1.37;2.45	40940;55843;72864;77045	6.55E-01;6.15E-01;7.06E-01;8.91E-03	397;4578;21599;36502	1.69E+00;1.73E+00;1.20E+00;1.31E+00
IL20	0.971032	1.49834	4	TTCTGAGATACGGGGCAGTG;CCGGAGAGTATAATGGTCAG;TGGTAAGAAAGGAATTGGCG;TTGACATCAGAATCTTAAGG	-0.07;0.55;1.28;2.12	45885;60257;71969;76605	7.95E-01;7.47E-01;6.44E-01;1.89E-02	837;5473;17185;31557	1.38E+00;1.59E+00;1.47E+00;1.56E+00
F13A1	0.970935	1.77591	5	TATTGTCCCAGGATCCAACG;TAAGAAAGATGGCACTCATG;GGAGAGATGGGACACTAACA;TGAGAGAGGACAGGTCTGTG;GCCGAGGCGGGCAGATCACG	-0.17;0.75;0.86;1.67;1.75	43575;64162;66174;75049;75411	9.88E-01;1.46E+00;8.79E-01;8.66E-01;5.77E-02	2031;2393;11268;13280;33867	9.28E-01;2.06E+00;1.65E+00;2.45E+00;1.80E+00
TAF5L	0.969768	2.07839	4	GCGGACCAGTGTACAGCACG;GCAGAACGAGGCTGCCCTAG;CGGGACACGTCTACTTGGTG;TAAGGTGAGGACTTTGCACA	-1.76;1.63;1.75;2.26	21715;74794;75408;76849	3.79E-01;2.18E+00;1.01E+00;1.33E-02	593;2034;2648;55727	1.52E+00;2.41E+00;3.81E+00;5.72E-01
RPS27AP1	0.969211	0.914183	1	GGATACGATAGAAAATGTAA	0.97	68006	0.0564	9436	0.914
CPS1	0.964666	1.56933	4	TGAAACCTTCTATAGATGGG;ATGCAGTATTCCATTGAGGT;TGCATCAGTCCAGACCAATG;TAACCCACCCAGTGCATAGG	0.14;0.73;1.4;1.59	50984;63901;73148;74544	9.79E-01;9.03E-01;7.28E-01;6.62E-02	2898;4294;13541;26458	8.74E-01;1.78E+00;1.75E+00;1.87E+00
FABP1	0.963017	1.64119	4	CAGAAGGGGAAGGATATCAA;GTGTCGGAAATCGTGCAGAA;TCCAAAACGAATTCACGGTG;TCAAGTTCACCATCACCGCT	0.34;1.02;1.12;1.38	55484;68831;70075;72947	1.18E+00;1.23E+00;5.50E-01;1.04E-01	4495;7367;8611;21958	7.12E-01;1.35E+00;2.31E+00;2.19E+00
RAB3D	0.962604	1.50424	4	GCCCACAGTACTGACGAAGG;GCTTGATCCTCTTGTCATGG;GGAGTAGGTCTTGATTTGCG;GTCCGCGTATCGGAACAGGA	0.26;0.6;0.88;2.12	53769;61134;66513;76594	1.10E+00;7.80E-01;4.47E-01;1.91E-02	848;10929;16308;23673	1.37E+00;1.05E+00;1.53E+00;2.06E+00
LL0XNC01-250H12.3	0.962493	2.46102	8	TGAAGCTCTGGGATACGTCG;TCCCCGTACAGCCATCTCGG;CCTCAAAGAAGGTCACACCC;CTGGTGGGCGACAGGGACGT;CCATACCCTCGAAAGACCAG;ATATTCCGCTCCTACTCTCG;TCTACGACATTGCAAACCGC;GCCGAGGCGGGCAGATCACG	0.2;0.66;0.73;0.77;1.08;1.25;1.25;1.75	52434;62479;63943;64665;69618;71670;71730;75411	2.70E+00;3.02E+00;2.30E+00;1.60E+00;1.47E+00;1.01E+00;4.62E-01;9.23E-02	2031;5712;5772;7824;12777;13499;14963;25008	7.59E-01;1.02E+00;1.80E+00;2.32E+00;2.40E+00;3.27E+00;4.19E+00;3.93E+00
CLUH	0.962355	1.63499	4	ATTCAGGTAAAAGCCCCGTG;CCCATCCGATGCCTTCAACG;ATTGAAGCGAATGTCGAAGG;TGGCGTCCGCACGTACAACG	0.56;0.78;1.11;1.4	60325;64879;69989;73169	1.47E+00;9.55E-01;5.46E-01;9.86E-02	4273;7453;12563;17117	7.30E-01;1.34E+00;1.84E+00;2.62E+00
CENPB	0.962001	1.53202	4	TCTCCCTACGACAAGCTCGA;GGGATCCTGGCCCTCTAGCG;CATAGCCGCCTGCTTTCGTG;GTACCATAGACTGGTCTCGG	0.0;0.44;1.54;1.87	47413;57795;74249;75933	8.45E-01;6.67E-01;8.38E-01;3.42E-02	1509;3193;19647;29886	1.13E+00;2.03E+00;1.31E+00;1.65E+00
OLIG2	0.961812	1.42069	4	CATCCTGGGGACAAGCTAGG;GAGGTCATGCCGTACGCACA;CTGGTGAGCGAGATCTACGG;CTCGTCGTCTACGTCGTCGG	-0.29;0.26;0.77;3.1	41012;53853;64664;77350	6.57E-01;5.70E-01;4.15E-01;2.04E-03	92;12778;23589;36430	2.32E+00;9.44E-01;1.10E+00;1.31E+00
GCSHP5	0.960237	1.20875	2	CGCGCGCAGGGTGCAGAGCA;AATTCACAGAGAAACACGAA	0.88;1.04	66501;69132	6.15E-01;9.86E-02	8310;10941	7.18E-01;1.70E+00
HOXC9	0.960232	1.55426	4	AGCTACCCGGACTACATGTA;CCGGAAACCTGGACGCTAGG;GCCGTACGGGTGATATACCA;GACGGAAAATCGCTACAGTC	0.33;0.61;1.25;1.64	55410;61543;71717;74877	1.18E+00;7.97E-01;6.29E-01;5.85E-02	2565;5725;15899;22032	9.22E-01;1.55E+00;1.56E+00;2.18E+00
CD274	0.959333	1.62343	4	CACCACCAATTCCAAGAGAG;GGTTCCCAAGGACCTATATG;ACTGCTTGTCCAGATGACTT;ACATGTCAGTTCATGTTCAG	0.23;1.06;1.1;1.44	52983;69354;69959;73532	1.06E+00;1.28E+00;5.45E-01;9.00E-02	3910;7483;8088;24459	7.62E-01;1.34E+00;2.39E+00;2.00E+00
TRIM64EP	0.958618	1.1728	2	GCCCAACTTCAACACCAATG;GATCCGGTCACCATTGACTG	0.77;1.15	64552;70516	5.57E-01;8.14E-02	6926;12890	7.88E-01;1.56E+00
KLF5	0.958491	1.61978	4	GTCTTGATGTGTGTTACGCA;GCTGTCTGATTTGTAGAACT;ACTGCAGTGAAACAATTCCA;GAAGAACTGGTCTACGACTG	-0.54;1.1;1.39;1.89	36175;69909;73005;75992	5.49E-01;1.33E+00;7.17E-01;3.28E-02	1450;4437;7533;41267	1.15E+00;1.76E+00;2.48E+00;1.09E+00
TMEM219	0.957803	1.5123	4	GGAAGTCAGATGGGATTGAA;TGGCGAGGGTCTCACGTCGT;AAGGAGCAGCAGGATCAAAG;ACTGGTCCTTATCACAGCCA	-0.59;0.39;1.5;2.52	35344;56788;73989;77111	5.33E-01;6.39E-01;8.08E-01;7.42E-03	331;3453;20654;42098	1.77E+00;1.96E+00;1.25E+00;1.06E+00
OR5L2	0.95718	1.53628	4	GAGCAAGCAAGACTTAGGAG;TTGCACATGTGGAGTCACTG;TGGTCACCATGTACAGCAGG;AGAAATCTACAAAGGACAAG	0.24;0.81;0.95;1.83	53182;65323;67701;75806	1.07E+00;9.81E-01;4.73E-01;3.71E-02	1636;9741;12119;24260	1.10E+00;1.14E+00;1.89E+00;2.02E+00
ZNF555	0.956238	1.55394	4	TGGGACTCTTGAGGGATGTG;AAGATCAAACCACAAACCAG;CGATTGAGGGAGGAAGTACG;TGTGTGTCTTCGAAACGTTG	-0.41;1.04;1.05;2.14	38419;69129;69227;76651	5.95E-01;1.26E+00;5.18E-01;1.78E-02	791;8215;8313;39023	1.40E+00;1.27E+00;2.36E+00;1.19E+00
KLF2	0.955783	1.53808	4	AAACCAGGGCCACCGAAAGG;CCCTCGCGCTTGAGGCCGCG;CTTCGGTCTCTTCGACGACG;TCGGGGTAATAGAACGCAGG	0.07;0.91;0.99;1.85	49381;67032;68374;75883	9.16E-01;1.09E+00;4.92E-01;3.53E-02	1559;9068;10410;28061	1.12E+00;1.19E+00;2.08E+00;1.76E+00
FAM86FP	0.954323	1.13801	2	TGGCAACTTAGACAGCCCCA;GACCCCGACCAGCGACACGA	0.63;1.28	61800;72038	4.92E-01;6.28E-02	5404;15642	8.87E-01;1.39E+00
SQLE	0.954307	1.58857	4	CGCTGTCGCCACCGAAACGG;GAAAACAATCAAGTGCAGAG;TGTGATGGGAGTTCAGTACA;GACCCAGAAGTTATCATCGT	0.09;0.97;1.26;1.49	49819;67990;71837;73918	9.33E-01;1.16E+00;6.36E-01;8.09E-02	3524;5605;9452;27623	8.01E-01;1.57E+00;2.19E+00;1.79E+00
FAM71F2	0.952241	1.65763	5	GTCTGCCACCGTGATCCTCG;ACCCTGGGGCCAGGTAACAT;GTGACCTGGAAATCAGCCTC;GCCGAGGCGGGCAGATCACG;TGGAGCTACGAATCTACGAC	-0.49;-0.22;0.95;1.75;2.77	36981;42462;67705;75411;77254	7.50E-01;5.57E-01;9.76E-01;9.29E-01;5.25E-03	188;2031;9737;34980;40461	1.92E+00;2.20E+00;1.82E+00;9.43E-01;1.41E+00
PCNT	0.95196	1.7698	5	ATCTAGTGTAGACTGCAACG;ACAGCGTGGGATGTTCACAA;GTGATGCCAATACAGCCACG;CAGACTTTGAGGAACAACTG;GCCGAGGCGGGCAGATCACG	0.5;0.53;0.57;1.41;1.75	59104;59866;60599;73233;75411	1.92E+00;1.16E+00;6.45E-01;6.63E-01;5.77E-02	2031;4209;16843;17576;18338	9.28E-01;1.60E+00;1.20E+00;1.99E+00;3.13E+00
CHST15	0.951784	1.51144	4	TGCCCTATGATGTAGAAGTG;GGCATTATTATCCCACATCG;CAAACAGTAAGAGCCCCTGT;GCTGCGAGACCGCTATCCCG	0.09;0.62;1.3;1.8	49822;61600;72182;75680	9.33E-01;7.99E-01;6.58E-01;4.00E-02	1762;5260;15842;27620	1.07E+00;1.62E+00;1.56E+00;1.79E+00
DMRTC1	0.948273	2.35158	8	CCTCACGCTACTCACATGCT;CAGTAGAAGAGGGTCAAGGG;TGATGGTCAAATTCCTGACA;AGAGGGTCAAGGGTGGCACA;AGGAATTTGACCATCAGAGC;GACTCTCCTTACCTCCTCGG;CCTGCAGGGGAGCTCCCAAG;TGGTTTCTGCCCACTCAGAG	-0.7;0.7;0.72;0.73;1.0;1.47;1.58;2.09	33449;63360;63629;63855;68438;73728;74493;76539	1.18E+00;3.17E+00;2.25E+00;1.51E+00;1.32E+00;1.32E+00;6.34E-01;4.07E-02	903;2949;3714;9004;13587;13813;14082;43993	1.07E+00;1.49E+00;2.32E+00;2.11E+00;2.28E+00;3.22E+00;4.37E+00;1.96E+00
DMRTC1B	0.948273	2.35158	8	CCTCACGCTACTCACATGCT;CAGTAGAAGAGGGTCAAGGG;TGATGGTCAAATTCCTGACA;AGAGGGTCAAGGGTGGCACA;AGGAATTTGACCATCAGAGC;GACTCTCCTTACCTCCTCGG;CCTGCAGGGGAGCTCCCAAG;TGGTTTCTGCCCACTCAGAG	-0.7;0.7;0.72;0.73;1.0;1.47;1.58;2.09	33449;63360;63629;63855;68438;73728;74493;76539	1.18E+00;3.17E+00;2.25E+00;1.51E+00;1.32E+00;1.32E+00;6.34E-01;4.07E-02	903;2949;3714;9004;13587;13813;14082;43993	1.07E+00;1.49E+00;2.32E+00;2.11E+00;2.28E+00;3.22E+00;4.37E+00;1.96E+00
TSPY13P	0.948203	2.30887	8	AAGCCCCACCTAGACCGCAG;CAGGATGGAGGCTGTACAGG;AGGCTGCGGCAGGGTTCCTG;GGCGCCTCTGCGGTCTAGGT;CGGCGCCTCTGCGGTCTAGG;GCGCCTCTGCGGTCTAGGTG;TCTGGATGACGGCGCCTCTG;CTGTACAGCCTCCATCCTGA	0.0;0.44;0.52;0.88;0.91;1.37;1.7;1.77	47720;57725;59512;66586;67159;72825;75195;75510	2.22E+00;2.37E+00;1.77E+00;1.83E+00;1.19E+00;1.16E+00;7.24E-01;8.77E-02	1932;2247;4617;10283;10856;17930;19717;29722	7.77E-01;1.70E+00;2.06E+00;1.91E+00;2.72E+00;2.59E+00;3.38E+00;3.33E+00
NCOA4	0.94795	1.638	4	GGTGTGGAGATTGAAAACCT;AGATTGGCTAGTGACTCCCC;ACAGACCTGACTGTTCTCCA;GAGGTGTAGTGATGCACGGA	0.7;0.77;0.79;1.54	63212;64544;65011;74214	1.69E+00;9.37E-01;4.20E-01;7.39E-02	3228;12431;12898;14229	8.33E-01;9.63E-01;1.81E+00;2.94E+00
DNAJB13	0.940926	1.56713	4	CACACGCATCACCTTTGAGA;GCCAAAGAATAAGTCCTCCA;GACGTAACCAGTTGTCCATG;TGTTTCCACCAAAGAACTCG	-0.24;0.88;1.53;1.59	42017;66567;74174;74583	6.83E-01;1.06E+00;8.29E-01;6.53E-02	2859;3268;10875;35425	8.80E-01;2.01E+00;2.02E+00;1.36E+00
LOC107985139	0.939518	1.66397	4	GAGAGTGAACTTGATGACCC;CCTGGGAGCTCCATTCCCTA;TTGGATACCAGGATTCACCT;GGAGAAACCTGTTTCCCCAA	-0.29;1.3;1.33;1.41	41047;72195;72508;73258	6.57E-01;1.62E+00;6.80E-01;9.65E-02	4184;4934;5247;36395	7.38E-01;1.67E+00;2.94E+00;1.31E+00
ZNF24	0.939518	1.66397	4	GAGAGTGAACTTGATGACCC;CCTGGGAGCTCCATTCCCTA;TTGGATACCAGGATTCACCT;GGAGAAACCTGTTTCCCCAA	-0.29;1.3;1.33;1.41	41047;72195;72508;73258	6.57E-01;1.62E+00;6.80E-01;9.65E-02	4184;4934;5247;36395	7.38E-01;1.67E+00;2.94E+00;1.31E+00
HSPE1P3	0.939505	0.893029	1	CAACCAGTTAGCGTGAAAGT	0.94	67535	0.0594	9907	0.893
RAB9B	0.938825	1.58632	4	CTTAGGACACCCTTCTACAG;GAAAGAATTTATTTACTATG;TGTTACCCAGAACTACAAAG;GTTCTTAAATCGAGATCTGG	0.09;1.05;1.16;1.45	49935;69211;70643;73561	9.37E-01;1.27E+00;5.74E-01;8.93E-02	3881;6799;8231;27507	7.65E-01;1.41E+00;2.37E+00;1.80E+00
C1orf87	0.937375	1.7732	5	CATGCACATAGGATAAGGAC;TAAACACTTTCAATACCTCG;CTGAGAAAAACTGAGAGTCA;TGTAGGTCAGGGCTATATGT;GCCGAGGCGGGCAGATCACG	-0.28;0.95;1.06;1.21;1.75	41116;67690;69322;71226;75411	8.91E-01;1.82E+00;1.10E+00;5.42E-01;5.77E-02	2031;6216;8120;9752;36326	9.28E-01;1.30E+00;2.03E+00;2.96E+00;1.64E+00
OR3A1	0.936327	1.58033	4	GCCCCTGACCGTGACCAGGT;TGGGTAAGGCAGGCCCCACA;CCAGCACTGATAGGTTCCCC;GTTGGTGAAAGCACAAGCCC	-0.3;0.97;1.51;1.57	40718;67983;74020;74437	6.49E-01;1.16E+00;8.12E-01;6.87E-02	3005;3422;9459;36724	8.61E-01;1.97E+00;2.19E+00;1.30E+00
HMGB1P6	0.935286	1.09593	2	GGTGATGTTGCGAAGAAACT;GGCGATACTCAGAGCAGAAG	0.3;1.57	54642;74455	3.81E-01;3.42E-02	2987;22800	1.13E+00;1.06E+00
DNAJB7	0.93342	1.62545	4	GAGGACCTGTTAAATCGTCC;AGAAGTAGCTGAGGCATACG;ACAGAAGGATTAAACGGAGG;TGATACAGGATATACATCAC	0.37;1.03;1.06;1.27	56268;68970;69317;71921	1.23E+00;1.24E+00;5.22E-01;1.28E-01	5521;8125;8472;21174	6.41E-01;1.28E+00;2.33E+00;2.25E+00
SRPX2	0.933379	1.53917	4	CAGAATCTTTCACCAACGGT;TTTAATGTATAACACCATCG;TAGTGATGAATGGTAGTGCG;ATGGCGGTTATGATCGCCAG	0.31;0.76;1.15;1.52	54847;64396;70521;74073	1.15E+00;9.29E-01;5.69E-01;7.72E-02	3369;6921;13046;22595	8.17E-01;1.40E+00;1.80E+00;2.14E+00
GTF2H5	0.932804	1.47179	4	TGAAAGGAGTGCTTATAGAA;TTGGATGAGTCCAATGCCCT;AACATGGTCAACGTCTTGAA;AGCAGAAACTGCTTCATGGC	0.29;0.54;0.78;2.13	54332;59928;64806;76626	1.13E+00;7.36E-01;4.17E-01;1.84E-02	816;12636;17514;23110	1.39E+00;9.51E-01;1.45E+00;2.10E+00
LOC107986117	0.93186	1.31537	2	CCAGTCCTGCTTTCAAAGGG;CAGCCAATCAGAGCACACAG	-0.75;2.61	32666;77170	3.12E-01;3.04E-03	272;44776	2.15E+00;4.76E-01
KCTD9P2	0.930193	0.88754	1	AATCCTAACAATCCCTCAGG	0.93	67409	0.0603	10033	0.888
TMEM186	0.929066	1.70141	4	GGTTTCGGGGAAAAGCTGTG;AACACCGTGTGCCTCATGAG;CAGTCGTGACAGGAACCCGA;GAGTACAAGTAATAGCCTGG	0.78;0.87;0.89;1.17	64777;66426;66788;70795	1.83E+00;1.05E+00;4.52E-01;1.56E-01	6648;10654;11016;12665	5.81E-01;1.07E+00;2.01E+00;3.15E+00
PEBP4	0.92801	1.52204	4	GTTACTGGGTCTCATGATGG;GCCGATAGTCAAGTTCCCGG;AGAGGGTGTCCTCGTCCAAG;GGAAGCCACTGTGTGCCGGT	0.09;0.93;1.02;1.68	49883;67351;68754;75081	9.35E-01;1.11E+00;5.03E-01;5.38E-02	2361;8688;10091;27559	9.54E-01;1.23E+00;2.11E+00;1.79E+00
BIRC7	0.927698	1.53353	4	GCTGCCGGCTTCTTCCACAC;CAGCGGCCAGTCATAGAAGG;AGCCGGTGATGGTCCCACGC;CCTGGACGGAGCATGCCAAG	0.37;0.44;1.38;1.52	56173;57891;72974;74098	1.22E+00;6.70E-01;7.14E-01;7.67E-02	3344;4468;19551;21269	8.20E-01;1.75E+00;1.32E+00;2.24E+00
ZNF671	0.927644	1.61552	4	GCAGTCATGAAACTAGAGCG;CGGAGCTAACGGACTCCGCG;AAGAGCACTAAGCTTGTGAG;CACCTGGCTAAATACCATGG	0.47;0.88;1.15;1.21	58517;66504;70480;71253	1.36E+00;1.05E+00;5.67E-01;1.45E-01	6189;6962;10938;18925	6.04E-01;1.40E+00;2.01E+00;2.45E+00
ARF4	0.927605	1.68338	5	ACTTCCAGAATACCCAGGTA;TCTGCTTCTTGCCAAATAGT;TAAACTTTCTTACCAATGGT;TCAATTCATCTACCAGAAGC;GCCGAGGCGGGCAGATCACG	0.23;0.38;0.85;1.43;1.75	53089;56452;66031;73410;75411	1.47E+00;9.76E-01;8.71E-01;6.77E-01;5.77E-02	2031;4032;11412;20990;24353	9.28E-01;1.64E+00;1.63E+00;1.71E+00;2.51E+00
PDK3	0.926916	1.82261	6	CAAGGCAGGCAGATCACCTG;TAAGCATGCGGAAAGAGATG;ACATCCGCCACGTTACAGGT;TAGCATATGAAACAGATGTG;GCCGAGGCGGGCAGATCACG;TTACTTAACCGCCCTTCAGT	-0.53;0.26;0.69;1.21;1.75;2.18	36237;53771;63133;71254;75411;76715	9.22E-01;1.20E+00;1.17E+00;1.16E+00;8.61E-01;2.45E-02	727;2031;6188;14309;23671;41205	1.27E+00;2.03E+00;2.10E+00;1.93E+00;1.95E+00;1.64E+00
PADI3	0.925642	1.58089	4	CATCACAGCTCGGATCATCA;ATGGGAAAGAGTACCCCCTG;GCCGCACAAGACCCTCCCGG;ACGTGTTGTTCCTCACACTA	-0.19;1.08;1.36;1.45	43139;69599;72784;73548	7.13E-01;1.30E+00;7.00E-01;8.96E-02	3894;4658;7843;34303	7.64E-01;1.72E+00;2.43E+00;1.41E+00
F2R	0.925244	1.56753	4	AAATGACCGGGGATCTAAGG;TGGCCATGATGTTTAGTGGG;CACAAACAGCACATCTGCCG;GGAGCTGGTCAAATATCCGG	0.3;0.92;1.1;1.38	54592;67194;69949;72998	1.14E+00;1.10E+00;5.45E-01;1.03E-01	4444;7493;10248;22850	7.16E-01;1.34E+00;2.09E+00;2.12E+00
RNF138	0.924829	1.46411	4	TCACACGTGCTGACAGGCCG;AGATCTCTCAAGATTCAGTA;CACAGGGGACACTTAAAAGT;GTCACATTTCCACGACATAG	-0.39;0.77;1.13;2.19	38828;64704;70317;76722	6.04E-01;9.46E-01;5.60E-01;1.62E-02	720;7125;12738;38614	1.44E+00;1.38E+00;1.83E+00;1.21E+00
B4GALT4	0.923718	1.46959	4	GGAGCATCCCAAGCATCTGG;GAAAATCCCAAAGTGTCCAG;GGGCTATCTAGAAGCCCTCA;ACCCACGAAGTAGTTACTGG	0.11;0.27;1.39;1.92	50264;54012;73042;76105	9.50E-01;5.73E-01;7.20E-01;3.02E-02	1337;4400;23430;27178	1.18E+00;1.76E+00;1.11E+00;1.82E+00
CALD1	0.921701	1.52924	4	CGCTGGCCCTCCCTCCAGGG;CTACCAGAAGAATGATTGGA;TTCAGAAGAGCCTAAACAAG;TTCCACTTGAGTGTTTGTGG	-0.35;0.67;1.66;1.72	39657;62594;74972;75260	6.24E-01;8.41E-01;9.37E-01;4.96E-02	2182;2470;14848;37785	9.85E-01;2.24E+00;1.64E+00;1.25E+00
BCAT2	0.921599	1.7548	5	GGTCGGGCCCATACAGCCAG;ACGAACAGGAGCGCGCGCGT;TCGGCAACTACAAGTTAGGT;AAATGTCTTCCCAAACACCA;GCCGAGGCGGGCAGATCACG	0.34;0.81;0.84;0.88;1.75	55510;65255;65883;66521;75411	1.64E+00;1.56E+00;8.63E-01;4.16E-01;5.77E-02	2031;10921;11559;12187;21932	9.28E-01;8.99E-01;1.62E+00;2.59E+00;2.74E+00
NXF2B	0.921552	2.38113	8	CCAGGAGAATGATGGAAGCG;AGGAGCTGTCATTATGAACA;ATGCCCGATTTCGGACGTAG;ACGAAATCCGTATTACCACG;CAACAACAAGCTGTACCAGC;ATAACTGACATCCTTCAATG;ACACACAGGATGGATACACA;TTACGGGATAAAGTATGACA	-2.53;-0.05;0.45;1.31;1.33;1.45;1.78;3.64	14624;46180;57999;72322;72547;73562;75565;77405	4.57E-01;1.37E+00;1.63E+00;2.99E+00;1.99E+00;1.29E+00;7.87E-01;1.62E-03	37;1877;3880;4895;5120;19443;31262;62811	2.42E+00;1.85E+00;2.26E+00;3.07E+00;4.24E+00;2.41E+00;2.08E+00;7.28E-01
NXF2	0.921552	2.38113	8	CCAGGAGAATGATGGAAGCG;AGGAGCTGTCATTATGAACA;ATGCCCGATTTCGGACGTAG;ACGAAATCCGTATTACCACG;CAACAACAAGCTGTACCAGC;ATAACTGACATCCTTCAATG;ACACACAGGATGGATACACA;TTACGGGATAAAGTATGACA	-2.53;-0.05;0.45;1.31;1.33;1.45;1.78;3.64	14624;46180;57999;72322;72547;73562;75565;77405	4.57E-01;1.37E+00;1.63E+00;2.99E+00;1.99E+00;1.29E+00;7.87E-01;1.62E-03	37;1877;3880;4895;5120;19443;31262;62811	2.42E+00;1.85E+00;2.26E+00;3.07E+00;4.24E+00;2.41E+00;2.08E+00;7.28E-01
ALAS1	0.920211	1.65034	5	TGGTGCAGTAATGACTACCT;ACAGATCAAAGAAACCCCTC;TCGAATCCCTTGGATCATGG;GCCGAGGCGGGCAGATCACG;CCACAATCTTGGGGACTGAG	-0.79;0.28;0.91;1.75;2.45	32103;54215;67047;75411;77047	6.13E-01;8.79E-01;9.32E-01;9.29E-01;1.11E-02	395;2031;10395;23227;45339	1.60E+00;2.20E+00;1.74E+00;1.55E+00;1.16E+00
ARGFX	0.919632	1.57472	4	CCTTTACTGTTGACTCCGGT;ACTGGTAGAACTCTCAGTGA;GCCCTGAAGCAATACGGAGA;GAGAAAAAGCATAAGGACTG	-0.91;0.35;1.82;2.42	30357;55839;75762;77015	4.53E-01;6.15E-01;1.09E+00;9.58E-03	428;1680;21603;47085	1.66E+00;2.57E+00;1.20E+00;8.64E-01
CNOT4	0.919506	2.08898	5	GAGAATCGCTTGAATCCGGG;GATTCTCTCAGTATAGGGAA;GTTCATCCAATCACAGTGCA;CATGTATCTTCATGAATTGG;ATAAACCTACAACAAAGACG	-1.64;1.01;1.61;1.7;1.93	22685;68585;74666;75179;76109	4.36E-01;1.93E+00;1.94E+00;8.87E-01;3.77E-02	1333;2263;2776;8857;54757	1.10E+00;2.11E+00;3.37E+00;3.12E+00;7.53E-01
RBCK1	0.918249	1.42561	4	CGCCTCATACCAGCCCGACG;AGTGCGCCCTGATATGACAG;GGAGACCCTGCACTCCCATG;CCAGCACCGAGTAGCACACG	-0.21;0.22;1.33;2.33	42637;52946;72533;76917	6.99E-01;5.52E-01;6.81E-01;1.18E-02	525;4909;24496;34805	1.58E+00;1.67E+00;1.06E+00;1.39E+00
EVC2	0.917777	1.63385	4	ATGAGCCCATGGCCCACTAG;AAAAGCCTGGAATCCTTCCG;TTGTCGAACACAAATCAGCA;GAAACATGCTCACCAGACAT	0.65;0.85;0.91;1.26	62354;66144;67001;71755	1.62E+00;1.03E+00;4.57E-01;1.32E-01	5687;10441;11298;15088	6.31E-01;1.09E+00;1.97E+00;2.84E+00
UCN3	0.917546	1.49992	4	GTGTCCCAAGCACAGCCCAG;TTGGGACACGTATCTGTACC;TGAGGCTGAGAAGGGCCAGT;TTGGCTTTGTAGAACTTGTG	0.47;0.54;0.84;1.82	58466;59913;65959;75771	1.35E+00;7.35E-01;4.36E-01;3.79E-02	1671;11483;17529;18976	1.09E+00;1.02E+00;1.45E+00;2.44E+00
ZFP36	0.91594	1.38497	4	CCCGTGCCATCCGACCATGG;AGAGTTCCGTCTTGTATTTG;GGGCCGCCAGGTCTTCGCTA;TAGCTCAGTCTTGTAGCGCG	-0.31;0.35;0.63;2.99	40575;55859;61876;77329	6.46E-01;6.15E-01;3.87E-01;2.51E-03	113;15566;21583;36867	2.24E+00;8.10E-01;1.20E+00;1.29E+00
RPS17P6	0.914706	0.876978	1	GAAAAGTACTACACGCGCCT	0.91	67162	0.0618	10280	0.877
SOCS2	0.914686	1.59491	4	GCTTAAACAATTTGACAGTG;CTTCGAATCGAATACCAAGA;AAATTAAAAGAGGCACCAGA;AAAACCCCAGGATGGTACTG	-0.5;1.06;1.54;1.56	36826;69307;74224;74391	5.62E-01;1.28E+00;8.35E-01;6.98E-02	3051;3218;8135;40616	8.55E-01;2.02E+00;2.38E+00;1.12E+00
ITGA6	0.914045	1.71685	5	GGAGCTCCGTATGATGACTT;CGGATCGAGTTTGATAACGA;TTTCCAGTTATAAGTACCCG;AGATGGCGATGACGCCCATG;GCCGAGGCGGGCAGATCACG	0.22;0.77;0.86;0.97;1.75	52936;64607;66303;67951;75411	1.47E+00;1.50E+00;8.87E-01;4.40E-01;5.77E-02	2031;9491;11139;12835;24506	9.28E-01;9.94E-01;1.66E+00;2.50E+00;2.50E+00
TMEM214	0.913303	1.4516	4	AGCTACGTGGGATCATCCGA;AATGCCAGCACTTTCAGTCG;ACAAGCACCCTTTATGAGCG;GGATGGCCTGGATACAGATG	0.28;0.46;1.01;1.91	54096;58231;68608;76069	1.12E+00;6.80E-01;4.99E-01;3.11E-02	1373;8834;19211;23346	1.17E+00;1.21E+00;1.34E+00;2.08E+00
AAGAB	0.909882	1.66564	5	CAAGAATGGTGCATCAAACA;AGCAGACATCAATCTATGTG;CACTACATTGGACCACACAT;GCCGAGGCGGGCAGATCACG;GCCATGAGGAGACACTATCA	-0.16;0.16;1.05;1.75;1.75	43722;51338;69244;75411;75438	9.94E-01;7.74E-01;1.10E+00;9.29E-01;5.69E-02	2004;2031;8198;26104;33720	9.34E-01;2.20E+00;2.02E+00;1.37E+00;1.81E+00
CHM	0.908415	1.52773	4	GGACAAAACTATTCAACATG;AATGCATGACAATATATTGG;TACAGAAGAAGCTACTATGG;TGCATTTCGAGAAGGACGAG	-0.34;1.03;1.27;1.67	40026;68900;71892;75058	6.32E-01;1.24E+00;6.40E-01;5.43E-02	2384;5550;8542;37416	9.50E-01;1.58E+00;2.32E+00;1.26E+00
EED	0.908067	1.50471	4	ATGGCTCGTATTGCTATCAT;ACAAACACGCCAAATGCACC;AAGAGAATGATCCATACCAC;TTGTGAATGACATTCATACA	-0.89;0.93;0.95;2.64	30642;67428;67679;77186	4.57E-01;1.12E+00;4.73E-01;5.73E-03	256;9763;10014;46800	1.88E+00;1.14E+00;2.12E+00;8.75E-01
TAF1L	0.906546	1.47742	4	TCCTGGGCCTAACTCCAGAA;GAAGGGCAAGTGTCTCCTAG;CAAAACAGGTGTCATCAGGG;CCTTGGTAAATGATGAAGGG	0.03;0.59;1.41;1.59	48500;61036;73207;74597	8.84E-01;7.77E-01;7.33E-01;6.50E-02	2845;4235;16406;28942	8.82E-01;1.80E+00;1.52E+00;1.71E+00
SAT1	0.906368	1.45487	4	ACAATAACTTGCCAATCCAC;CCGACTGCAGTGACATACTG;GCTGGCTAAATATGAATACA;AAAGAGCACTGGACTCCGGA	-0.01;0.14;1.51;1.98	47177;51013;74046;76249	8.37E-01;5.18E-01;8.14E-01;2.69E-02	1193;3396;26429;30265	1.23E+00;1.98E+00;9.80E-01;1.63E+00
THAP12P1	0.906291	0.871187	1	TCAGCCTCATGTCCATCCAG	0.91	67024	0.0627	10418	0.871
KLHL32	0.90586	1.43245	4	TGCAACAGCCCTTGTCAACG;ACATACCTGGATGAGATAGT;TCTGCAAGGTCAAGGAACTT;TCTGCCCAGGAATTACTGCG	-0.1;0.77;0.91;2.04	45034;64653;67119;76426	7.68E-01;9.43E-01;4.60E-01;2.29E-02	1016;10323;12789;32408	1.30E+00;1.10E+00;1.82E+00;1.51E+00
USP26	0.902088	1.42984	4	GGACAGAGTTCATCAAAACG;GAAGCCTAAAAGTGAATTTG;ACTGAATGAGTGCACTCCAA;ATAGTGACGGTTACACAAAG	0.21;0.5;0.97;1.93	52499;59190;67976;76135	1.04E+00;7.11E-01;4.81E-01;2.95E-02	1307;9466;18252;24943	1.19E+00;1.16E+00;1.40E+00;1.97E+00
ARID1A	0.901613	1.61595	5	TCCTGCCTCAGCCTCCCGAG;CCTGTTGACCATACCCGCTG;CAGCAGAACTCTCACGACCA;CACATCCCTGACCCAACCTG;TTTGAATGCAAGATTGAACG	-0.4;0.14;0.76;1.86;2.15	38719;51048;64332;75905;76664	8.06E-01;7.64E-01;7.84E-01;1.04E+00;2.19E-02	778;1537;13110;26394;38723	1.32E+00;2.43E+00;1.48E+00;1.35E+00;1.51E+00
CCK	0.899829	1.53499	4	AGGGTATCGCAGAGAACGGA;GCTGGCAAGATACATCCAGC;GATACCCTCAGCTGCCTACG;ACGATGGACATTCGTCCAGA	0.3;0.82;1.18;1.3	54697;65596;70847;72166	1.15E+00;9.97E-01;5.84E-01;1.23E-01	5276;6595;11846;22745	6.57E-01;1.44E+00;1.92E+00;2.13E+00
CEP41	0.899243	1.52587	4	TTCCCTCTCTGATCAAACAC;GAGCAGTTCATAAACAACGC;AAATCCACGCTCGCACATGG;GGGGAACTGGATCTAGACAA	0.06;0.98;1.15;1.4	49127;68234;70501;73163	9.07E-01;1.18E+00;5.68E-01;9.87E-02	4279;6941;9208;28315	7.30E-01;1.40E+00;2.23E+00;1.75E+00
EIF1	0.898937	1.44937	4	TTGCAGAAGTTTGCCTGCAA;ATAGCTTACCGAAAGAGTGG;CGATAAAAAGAAACTAGTGA;GAATTCAACAGAGAAACGGC	-0.23;0.79;1.21;1.82	42286;64902;71207;75785	6.90E-01;9.57E-01;6.01E-01;3.76E-02	1657;6235;12540;35156	1.10E+00;1.48E+00;1.85E+00;1.37E+00
ITGB1BP2	0.898137	1.48164	4	GAAGTGAACTGCTTGTAGCA;CATGGAAGATTGGGACCCCA;GAGTCGGTAGACATGACTGG;AGGAGCACCCCGATTCCATG	-0.37;0.88;1.29;1.78	39414;66625;72151;75581	6.18E-01;1.06E+00;6.56E-01;4.22E-02	1861;5291;10817;38028	1.05E+00;1.61E+00;2.03E+00;1.24E+00
DGAT2	0.896477	1.43844	4	TGGCAATGCTATCATCATCG;ATCAGGTACTCCCTCAACAC;CTGGCTCAATAGGTCCAAGG;CCCAGGCCCATGATACCATG	-0.26;0.56;1.41;1.87	41639;60419;73198;75958	6.73E-01;7.53E-01;7.33E-01;3.36E-02	1484;4244;17023;35803	1.14E+00;1.79E+00;1.48E+00;1.34E+00
BEX2	0.896167	1.45647	4	AGCGTTAAACAATCTCATCG;CAGTATTCACTAACATTCAA;TGCCTAGAGGAAACCGTAGG;ATAGATGGGACATAATGCAT	0.09;0.61;1.28;1.61	49746;61513;71999;74657	9.30E-01;7.95E-01;6.46E-01;6.36E-02	2785;5443;15929;27696	8.90E-01;1.59E+00;1.56E+00;1.79E+00
ECHDC3	0.895936	1.45898	4	CTCTTGCCAAGGCAACCCCA;CCATGGCAATGACGGGAACG;GGGCCCATGTGTCTCCGGCG;TGCCAGCTGCGACATTGCCG	0.39;0.51;0.95;1.74	56725;59304;67681;75352	1.25E+00;7.14E-01;4.73E-01;4.75E-02	2090;9761;18138;20717	1.00E+00;1.14E+00;1.41E+00;2.29E+00
OXCT2	0.89314	1.57374	4	CGTAGGAACAGACGATGCGA;TAGAACTTGGCACGGAGCCG;GGAGGTGGAAGAGATCGTGG;GCTCATGAGCCAGCCCCGAG	0.63;0.75;0.88;1.31	61850;64285;66486;72359	1.58E+00;9.23E-01;4.46E-01;1.18E-01	5083;10956;13157;15592	6.69E-01;1.05E+00;1.79E+00;2.78E+00
WDR4	0.892379	1.43037	4	TGAACAGAAGCAGCTACCTG;TCTCGTCCCGGTCGGCAGTG;GTTTGTGAGCCGTATCTCCG;GGTGTGGCCGTCTAGAGCTG	-0.41;0.0;1.49;2.49	38471;47642;73886;77086	5.96E-01;4.73E-01;7.97E-01;7.98E-03	356;3556;29942;38971	1.74E+00;1.94E+00;8.48E-01;1.19E+00
VN1R1	0.889195	1.46264	4	AAGGACCATGGAGTTAGCCA;GCCCAAACTCATAAAATCAG;GATGCATTCATCAAGACATG;CCATCCACCTGCATATACTG	-0.09;0.23;1.64;1.77	45323;53058;74881;75547	7.77E-01;5.54E-01;9.22E-01;4.30E-02	1895;2561;24384;32119	1.04E+00;2.21E+00;1.07E+00;1.53E+00
MPC1L	0.887154	1.49719	4	GAGAGATAACTTCCAGAGCA;GCGTCGCCGGAGATCATCAG;GCAGGTTTCGAGGCTGTACG;AACAGCGCTCATCTTGTACT	0.44;0.73;0.87;1.51	57816;63786;66363;74061	1.31E+00;8.98E-01;4.44E-01;7.75E-02	3381;11079;13656;19626	8.16E-01;1.04E+00;1.74E+00;2.38E+00
CDCP1	0.885954	1.50398	4	CGGCCGAATCGATGCCACCG;GACGTGTCAGATCATCACAA;GGTTTCAGATAAAATCTACG;CTGAGGATGAGCTCATGACG	0.25;0.78;1.19;1.31	53534;64885;71032;72339	1.09E+00;9.56E-01;5.93E-01;1.18E-01	5103;6410;12557;23908	6.68E-01;1.46E+00;1.85E+00;2.04E+00
ELOVL5	0.88576	1.35925	4	CAAGAACAACCACCAGATCA;TGGAGAAGTAGTACCACCAG;GTGGATGAAGCTATTAAGTG;GGCTGGGACCAAAATACATG	-0.07;0.36;0.79;2.47	45633;56086;64925;77065	7.87E-01;6.21E-01;4.19E-01;8.46E-03	377;12517;21356;31809	1.72E+00;9.58E-01;1.22E+00;1.55E+00
RNF5P1	0.883995	0.855507	1	AGTGTCCAGTATGTAAAGCT	0.88	66641	0.0652	10801	0.856
TAF9B	0.883578	1.40411	4	GAATCACAGAGTATGAACCA;TGGGACAGACACCGTTTGTG;GCACTTACCAAGGCATCTCT;ATCCCCTAGGGACCTAACCA	-0.0;0.58;1.13;1.82	47318;60807;70289;75779	8.42E-01;7.68E-01;5.59E-01;3.77E-02	1663;7153;16635;30124	1.09E+00;1.38E+00;1.51E+00;1.64E+00
TMEM132C	0.883149	1.62867	5	GCTGCGTTTGGATGGTAACG;CAGCGGCGGAAAGCACGTGA;ACCTCTTATTGGTCACAATG;GAAGCTGGAGGAACCTCACG;GCCGAGGCGGGCAGATCACG	-0.37;0.6;0.77;1.67;1.75	39275;61171;64688;75041;75411	8.25E-01;1.24E+00;8.01E-01;8.64E-01;5.77E-02	2031;2401;12754;16271;38167	9.28E-01;2.06E+00;1.51E+00;2.11E+00;1.54E+00
MIR205HG	0.882161	1.50541	4	TCTCAAGTACCCATCTTGGA;CGGAACAGAAATGACTCCTG;AGGGTACGGACCCCACATGA;GAGTCATTTCTGTTCCGCAC	0.0;0.96;1.23;1.34	47675;67857;71416;72611	8.54E-01;1.15E+00;6.12E-01;1.12E-01	4832;6026;9585;30004	6.87E-01;1.51E+00;2.18E+00;1.65E+00
LOC646934	0.881912	1.07523	2	AAAACAAGTCCAGCTAGAGC;GGGAAAGCTCCAATCCCAGG	0.59;1.17	61038;70763	4.76E-01;7.83E-02	6679;16404	8.02E-01;1.35E+00
LINC00314	0.880893	0.853141	1	CACCTTCAACTAATTGGATG	0.88	66582	0.0656	10860	0.853
LINC01515	0.880893	0.853141	1	CACCTTCAACTAATTGGATG	0.88	66582	0.0656	10860	0.853
SPIN3	0.878889	1.622	5	CAAGGCAGGCAGATCACCTG;TGGTAACAGACACACTGCCG;GAGATGAACCTCTAACACAG;CAGCCCACGATGTTCCCCCG;ATATTTGATAAGATACAGAG	-0.53;0.13;1.08;1.75;1.97	36237;50781;69569;75418;76222	7.27E-01;7.56E-01;1.13E+00;9.30E-01;3.45E-02	1220;2024;7873;26661;41205	1.13E+00;2.20E+00;2.07E+00;1.34E+00;1.37E+00
TRAK1	0.877371	1.88558	6	CAAGGCAGGCAGATCACCTG;GAATGTTGTACTTCGATCCG;CCATGCCCAATACCACGTCT;AGAACAAGACCCTAACCGAG;GTGTATGGAGCCAGTCGTCG;GCCGAGGCGGGCAGATCACG	-0.53;0.32;1.23;1.24;1.26;1.75	36237;55048;71475;71574;71828;75411	9.22E-01;1.28E+00;2.14E+00;1.20E+00;5.25E-01;6.92E-02	2031;5614;5868;5967;22394;41205	8.61E-01;1.23E+00;2.16E+00;3.35E+00;2.06E+00;1.64E+00
MOXD1	0.87642	1.45596	4	GCGTCCGCCGACATCGTCGT;CCAAGGGATAATCCAACATG;TGTTGGGGTGATAGCACTCG;GCAAACACATGAATTCCACT	0.29;0.42;1.3;1.49	54454;57504;72198;73888	1.13E+00;6.59E-01;6.59E-01;8.16E-02	3554;5244;19939;22988	7.97E-01;1.62E+00;1.30E+00;2.11E+00
POU5F1P3	0.875819	0.849359	1	GAAGCTGGAGCAAAACCCGG	0.88	66487	0.0662	10955	0.849
KIF20A	0.875543	1.42673	4	CTTGGGTGCTTGTAGAACAA;GCAGACTTTGCGGCTATGCG;GGAGTGTCTACATCGAAAGT;CATGCCCCACCTATGCAACT	-0.17;0.68;1.32;1.67	43446;62960;72422;75042	7.22E-01;8.58E-01;6.74E-01;5.47E-02	2400;5020;14482;33996	9.48E-01;1.66E+00;1.67E+00;1.43E+00
DHCR7	0.875365	1.35966	4	CAAACCAGAGCAGGTGCGTG;TGGGCATCGAGTTTAACCCT;TCTGCCATGACCACTTCGGG;CCAAGACTCCACCTATAACG	-0.11;0.53;0.71;2.37	44859;59762;63530;76963	7.63E-01;7.30E-01;4.02E-01;1.08E-02	479;13912;17680;32583	1.61E+00;8.85E-01;1.43E+00;1.50E+00
ETS2	0.875217	1.50448	4	GCTGTTAATCCAATGAGGAA;TTGCTGCACGGGGTTAACAA;GCTGTCCGCACCGTTCTCAG;CAGACACAGAATTACCCCAA	-0.57;0.74;1.64;1.69	35555;64014;74904;75156	5.37E-01;9.09E-01;9.26E-01;5.20E-02	2286;2538;13428;41887	9.67E-01;2.22E+00;1.76E+00;1.07E+00
TBX22	0.874985	1.87451	6	CAAGGCAGGCAGATCACCTG;ACTCCAAGACCCAATACAGG;ACGTCTATCACAGCTCACAG;CGAGTGCACGTGATAGAGCA;GCCGAGGCGGGCAGATCACG;AGCTTCAAGGATCTGAACTG	-0.53;-0.29;1.03;1.48;1.75;1.82	36237;40892;68941;73800;75411;75759	9.22E-01;6.83E-01;1.73E+00;1.56E+00;8.61E-01;5.72E-02	1683;2031;3642;8501;36550;41205	9.32E-01;2.03E+00;2.74E+00;2.76E+00;1.13E+00;1.64E+00
ATPAF1	0.874616	1.45482	4	CAGGTGGCCGGTCTCTACCG;GGGAAACAGTCTGTGAACAG;GTAGCGGTCGTAGAAAGGGT;TGAATTTCGGAAGCAGCCAG	0.22;0.77;0.99;1.52	52846;64625;68270;74117	1.06E+00;9.41E-01;4.89E-01;7.62E-02	3325;9172;12817;24596	8.22E-01;1.18E+00;1.82E+00;1.99E+00
KDM4D	0.874351	1.44901	4	AACCTGAACGCTATGACCTG;CTTCAATCGCATAACTCAGG;ATAATCAATCCATCGCGGAG;AAATCGGTGAATTATAGATG	0.21;0.69;1.1;1.5	52543;63103;69937;73940	1.04E+00;8.65E-01;5.44E-01;8.04E-02	3502;7505;14339;24899	8.03E-01;1.34E+00;1.68E+00;1.97E+00
AKAP17A	0.874247	1.46873	4	ACATGAACGAGACCCTGCCG;GTGATGCCTCAATTAAGAAG;GTACTCGCGGTACTGCACAT;GCTCTTGGAAATACGCAGCG	0.41;0.6;1.02;1.46	57256;61150;68820;73681	1.28E+00;7.81E-01;5.05E-01;8.65E-02	3761;8622;16292;20186	7.76E-01;1.23E+00;1.53E+00;2.34E+00
OPN1LW	0.870596	2.14562	8	TACCTGCTCCAACCAAAGAT;TGCGGCCCAGACGTGTTCAG;CAGAGCATGATGATAGCGAG;GGTAATTCGGGCCTTCGAAG;CACGGCCTGAAGACTTCATG;GCACGAAGTAGCCAGAGACC;ACCAACAGCAACTCCACCAG;CAGCGGCAGCTCGTACCCCG	-0.51;-0.24;0.69;0.96;1.01;1.48;1.77;1.81	36619;41985;63026;67833;68646;73823;75501;75738	1.37E+00;1.12E+00;2.17E+00;2.01E+00;1.35E+00;1.34E+00;7.75E-01;7.73E-02	1704;1941;3619;8796;9609;14416;35457;40823	8.22E-01;1.82E+00;2.35E+00;2.14E+00;2.96E+00;3.11E+00;1.74E+00;2.22E+00
FAM92A	0.869556	1.47275	4	TCAAAGCAACACTCACAGCA;CAGGCCCAGCTTTAAATGCG;TGAAAAATTTCAGTCACAGG;TCAGGATTATCGACAAGCAG	0.22;0.64;1.31;1.31	52751;62130;72266;72335	1.05E+00;8.21E-01;6.63E-01;1.18E-01	5107;5175;15312;24691	6.68E-01;1.63E+00;1.61E+00;1.99E+00
ABHD6	0.869024	1.34165	4	CAAGGATATGTGGCTCAGTG;CTGACAATCAATTTGTACAA;AGTCTTCATGGTGAACATAG;GCAAGTTAAGAGGATACACC	-0.29;-0.26;0.81;3.2	41043;41649;65415;77364	6.57E-01;4.31E-01;4.27E-01;1.73E-03	78;12027;35793;36399	2.40E+00;9.86E-01;6.73E-01;1.31E+00
ROBO4	0.868672	1.53128	4	CGAAGGGACCTACATGTGTG;CCTGGGTGTCTACACATGTG;TCTGTACAGATATACCAGTG;CACTGCCCTCACCTAAAAGG	-0.53;-0.17;1.97;2.21	36226;43532;76217;76765	5.50E-01;4.39E-01;1.22E+00;1.52E-02	677;1225;33910;41216	1.47E+00;2.84E+00;7.24E-01;1.10E+00
NFRKB	0.866222	1.57567	5	TCTCAGATAAAGTAGAACTG;AACCAGCTAAGTCTAGCTCG;CCCTGTGTGAAATACGACAT;CGGACACTTTAACCCCGAGG;GCCGAGGCGGGCAGATCACG	0.0;0.48;0.88;1.22;1.75	47595;58686;66621;71354;75411	1.17E+00;1.09E+00;9.06E-01;5.48E-01;5.77E-02	2031;6088;10821;18756;30068	9.28E-01;1.32E+00;1.69E+00;1.88E+00;2.05E+00
PSMD10	0.864582	1.51264	4	AGCTTCGAAAAACAGGCATG;AGATGCTAAGGACCATTATG;TTGGTCTCCTCTTCATATTG;CAGCAGAACTGCATTGCACT	0.48;0.71;1.06;1.22	58632;63402;69316;71297	1.36E+00;8.79E-01;5.21E-01;1.44E-01	6145;8126;14040;18810	6.06E-01;1.28E+00;1.71E+00;2.46E+00
C2CD3	0.862535	1.39516	4	AGAGGCATTGACCCCGACTG;CCAAACGATGACACTAAGTG;ATTTAATAGGCAGAGGACCG;AGAGACCAGAAGGTCGCCAA	-0.21;0.62;1.28;1.75	42683;61674;72051;75439	7.00E-01;8.02E-01;6.49E-01;4.55E-02	2003;5391;15768;34759	1.02E+00;1.60E+00;1.57E+00;1.39E+00
ABHD15	0.859614	1.42409	4	TGTATGTGACCGCCTCCTTG;CTGGTGATCCCCAATGCGTG;CAAACAAGGCTGCACCCTCC;GGCCGGCCTCGAACCACTCT	-0.1;0.18;1.61;1.75	44994;51823;74697;75429	7.67E-01;5.32E-01;8.96E-01;4.57E-02	2013;2745;25619;32448	1.02E+00;2.15E+00;1.01E+00;1.51E+00
TMEM35B	0.859469	1.40526	4	TTCTTGATTCTGCTCATGAT;CTCAGCAAACTGCACGAACA;TGGTAGCCAAATACCTTCAG;CCTGAACTACCAAATAGCTG	-0.26;0.31;1.52;1.86	41599;54986;74137;75895	6.72E-01;5.95E-01;8.25E-01;3.50E-02	1547;3305;22456;35843	1.12E+00;2.00E+00;1.16E+00;1.34E+00
OR7D2	0.858833	1.5418	4	TGAGCCAGGTGACAAAAACC;GCTGAAACAGATGTCAACCC;TGGAGAAATAGACCTGTGTG;TGATCATATAGTGCAGAGGG	0.1;1.09;1.11;1.14	49984;69800;69991;70371	9.39E-01;1.32E+00;5.47E-01;1.66E-01	7071;7451;7642;27458	5.62E-01;1.34E+00;2.46E+00;1.80E+00
TMEM138	0.858331	1.42485	4	GACATGAAGGGAGATGCTGA;ATCTCCTTCAGAACTTACGC;CTTTGAACTTATGGAATAGG;CAGGCCAGCCTGGAAGACGA	-0.28;0.88;1.16;1.67	41084;66569;70629;75063	6.58E-01;1.06E+00;5.74E-01;5.42E-02	2379;6813;10873;36358	9.51E-01;1.41E+00;2.02E+00;1.31E+00
NUCKS1	0.85831	1.57765	5	ATAAAAATGTGCGCCAACAA;AAGGATGATTCTCACTCAGC;CTTCACATACTCTCCTGGAA;TAAACAGAGAGAGATGCTCA;GCCGAGGCGGGCAGATCACG	-0.12;0.07;1.02;1.57;1.75	44650;49403;68830;74417;75411	1.03E+00;7.14E-01;1.06E+00;7.79E-01;5.77E-02	2031;3025;8612;28039;32792	9.28E-01;1.87E+00;1.96E+00;1.26E+00;1.87E+00
NEFH	0.856875	1.40822	4	GGCCAAGTCTCCAACGAAGG;TGTCGATGTACCCGGCGAAG;TTTATGTGAGTGGACACAGA;CAGTCGGTCCAGCCTCACTG	-0.25;0.38;1.54;1.76	41668;56500;74246;75468	6.73E-01;6.32E-01;8.37E-01;4.48E-02	1974;3196;20942;35774	1.03E+00;2.03E+00;1.24E+00;1.34E+00
NRK	0.856652	1.61062	4	AGAACCACAAGATTTGGACC;TTGGACACTAGAACCCCCAC;TGTTCCAAAAGAGACCGCTG;AGAAGCTCGTGAGTGCAAGA	0.65;0.89;0.9;0.99	62279;66697;66931;68323	1.62E+00;1.07E+00;4.55E-01;2.18E-01	9119;10511;10745;15163	4.90E-01;1.08E+00;2.04E+00;2.83E+00
ARID4A	0.856407	2.27159	5	CATACGGCATGTTTGATGAG;GATGCTAGTTGGTATACCGT;AAGAAAATGAGCTACTACTG;GCCGAGGCGGGCAGATCACG;TGAAAGTAAAATATGGACGA	-2.46;1.41;1.48;1.75;2.11	15348;73239;73773;75411;76588	3.88E-01;2.85E+00;1.71E+00;9.29E-01;2.41E-02	854;2031;3669;4203;62094	1.28E+00;2.20E+00;3.02E+00;4.39E+00;4.80E-01
JAKMIP2	0.856097	1.44991	4	AGGACGGTGAAGGTACGTGA;CGACGCTGAACGAGAAGCCA;AGTCGGAGCGGGATATTCGG;AAAACTAAAAGCCGTTACCA	0.25;0.76;1.04;1.38	53387;64501;68997;72961	1.08E+00;9.35E-01;5.11E-01;1.04E-01	4481;8445;12941;24055	7.13E-01;1.25E+00;1.81E+00;2.03E+00
JAKMIP2-AS1	0.856097	1.44991	4	AGGACGGTGAAGGTACGTGA;CGACGCTGAACGAGAAGCCA;AGTCGGAGCGGGATATTCGG;AAAACTAAAAGCCGTTACCA	0.25;0.76;1.04;1.38	53387;64501;68997;72961	1.08E+00;9.35E-01;5.11E-01;1.04E-01	4481;8445;12941;24055	7.13E-01;1.25E+00;1.81E+00;2.03E+00
HTR2C	0.853884	1.36434	4	CAAGCTTTGATGTTACTGCA;TCTGCGCTATATCGCTGGAT;GGGCACAAATATCTAGGTAG;CGTCCCTCAGTCCAATCACA	0.01;0.4;1.14;1.87	47877;56981;70336;75952	8.61E-01;6.44E-01;5.61E-01;3.37E-02	1490;7106;20461;29565	1.14E+00;1.38E+00;1.27E+00;1.67E+00
NO_CURRENT_204	0.853507	1.37001	4	TAGTACATGTGTGGTATTTA;TAGTCCTTAGGGTGGGCTGA;TAGTCAACATTCGCAAGAGG;TAGGGGATTAGCTGACAGTC	0.11;0.58;0.8;1.92	50313;60766;65199;76095	9.52E-01;7.66E-01;4.23E-01;3.05E-02	1347;12243;16676;27129	1.18E+00;9.73E-01;1.50E+00;1.82E+00
ATP7B	0.853261	1.3319	4	CTCATTAAAGCTACCCACGT;AGGGACCATGTAAATGACAT;CTCACCAAGGGTCACAACGG;ATGAACTGAGCTATCTCGAG	-0.13;0.34;0.98;2.23	44286;55486;68168;76804	7.46E-01;6.06E-01;4.86E-01;1.43E-02	638;9274;21956;33156	1.49E+00;1.18E+00;1.19E+00;1.47E+00
NXPH3	0.852229	1.34534	4	CACTTCCAACACAATGCCAC;AACTCTACAGCTTTACTGGG;CTCCCTCCATAGGTCATCTG;CTCACCTAAGTCCCGCCCCA	-0.03;0.47;1.0;1.97	46725;58454;68479;76223	8.22E-01;6.87E-01;4.95E-01;2.75E-02	1219;8963;18988;30717	1.22E+00;1.20E+00;1.35E+00;1.61E+00
TMEM135	0.851949	2.05656	6	GGAATCTCACTCTGTCACCC;ACAGAAACACTATTCAGAAT;AGAATGGCCACATAAGATGC;AAGCGGATTGTAGGATCTCA;GCCGAGGCGGGCAGATCACG;TTTCATCAGAATGTTTAGCG	-1.53;0.27;1.27;1.58;1.75;1.76	23634;54040;71953;74525;75411;75478	5.28E-01;1.22E+00;2.24E+00;1.74E+00;8.61E-01;6.69E-02	1964;2031;2917;5489;23402;53808	8.73E-01;2.03E+00;3.02E+00;3.49E+00;1.98E+00;9.49E-01
C1QTNF3	0.850999	1.63914	5	CAAGGCAGGCAGATCACCTG;AAGGAGAGAAGGGCTACCCG;TACAGCTTTCGAGGCTACCA;ACAACACTTACTGCAGTCTG;CCATGTATTCATCTTGACAC	-0.53;0.79;1.03;1.3;1.67	36237;64975;68948;72222;75021	7.27E-01;1.53E+00;1.07E+00;5.94E-01;6.89E-02	2421;5220;8494;12467;41205	8.61E-01;1.43E+00;1.98E+00;2.55E+00;1.37E+00
RAB40A	0.8504	2.09188	7	TGAAGCTCTGGGATACGTCG;TCCCCGTACAGCCATCTCGG;CCTCAAAGAAGGTCACACCC;CTGGTGGGCGACAGGGACGT;CCATACCCTCGAAAGACCAG;ATATTCCGCTCCTACTCTCG;TCTACGACATTGCAAACCGC	0.2;0.66;0.73;0.77;1.08;1.25;1.25	52434;62479;63943;64665;69618;71670;71730	2.27E+00;2.43E+00;1.74E+00;1.12E+00;9.00E-01;4.84E-01;2.33E-01	5712;5772;7824;12777;13499;14963;25008	4.87E-01;1.10E+00;1.63E+00;1.82E+00;2.64E+00;3.53E+00;3.44E+00
LALBA	0.846466	1.49637	4	TCACAGATGTTCCTTGACTG;AGTTGAAAACAATGAAAGCA;ATAACCACTGGTGTGAAACA;AAAGACATAGATGGTTATGG	0.6;0.63;0.83;1.32	61283;61864;65721;72426	1.54E+00;8.10E-01;4.32E-01;1.16E-01	5016;11721;15578;16159	6.74E-01;1.00E+00;1.58E+00;2.72E+00
MYDGF	0.846276	1.3962	4	CATTCCTTCTCCCATAACGT;CGACGGTGGCGTTTGACGTG;TCACTTACGCCTCTCAAGGA;TACAGATAGGACTTCCCCTG	0.25;0.62;0.89;1.63	53416;61613;66837;74792	1.08E+00;8.00E-01;4.53E-01;6.05E-02	2650;10605;15829;24026	9.09E-01;1.08E+00;1.57E+00;2.03E+00
PIGF	0.845454	1.4672	4	GGTCCTAACAAACATAAGCA;TTTCAAACTTACTCTATCAG;TATTGGAAACACACTTGACA;AAGAAGTTCATTATCACACA	-0.13;1.05;1.09;1.37	44379;69168;69763;72913	7.49E-01;1.26E+00;5.38E-01;1.05E-01	4529;7679;8274;33063	7.09E-01;1.32E+00;2.36E+00;1.48E+00
ATP5G1P2	0.844539	0.828953	1	AATGTCCCGGGAGACAACAC	0.84	65960	0.0697	11482	0.829
MMP15	0.844002	1.54018	5	GATCTGGGCGGAACGCATGG;TCCCCACTGTGACGCCACGG;CGACGGGGACTTTGACACAG;CCTACCTAAAGGTCAGATGG;GCCGAGGCGGGCAGATCACG	-0.0;0.48;0.83;1.17;1.75	47258;58756;65682;70679;75411	1.15E+00;1.09E+00;8.52E-01;5.19E-01;5.77E-02	2031;6763;11760;18686;30184	9.28E-01;1.24E+00;1.60E+00;1.89E+00;2.05E+00
GP2	0.841874	1.41273	4	CAGTTCCCTGAACGTCAGTG;CAGTATCTCAGATTACACCA;GCCAGACAGACGCTCCCATG;GGGTGCGATAAAAACATGAG	0.0;0.84;1.01;1.51	47765;65948;68695;74017	8.58E-01;1.02E+00;5.01E-01;7.86E-02	3425;8747;11494;29677	8.11E-01;1.22E+00;1.95E+00;1.67E+00
TUSC2	0.841815	1.41785	4	CCGCGGCGCGTGAATACGAA;GGAACCCATGCCCTTACCCG;TCTGGCTCACGAGTTCTATG;GCCAGCGGGTCCAAAGCTCG	0.23;0.71;1.0;1.43	53008;63434;68477;73436	1.07E+00;8.80E-01;4.95E-01;9.22E-02	4006;8965;14008;24434	7.53E-01;1.20E+00;1.71E+00;2.00E+00
RUSC1-AS1	0.8408	1.30566	4	GTCTGGTGAATGCAGGAAAG;AAATGAATAGAGAAAGGGTG;ATGGACATACCGCTGTTCCG;GGGTGTAGACCGATGGACCT	-0.58;-0.03;0.73;3.24	35486;46635;63871;77371	5.35E-01;4.63E-01;4.05E-01;1.57E-03	71;13571;30808;41956	2.44E+00;9.02E-01;8.19E-01;1.06E+00
ATG14	0.840649	1.3787	4	AGGAAGTAAAGACGGGTGTG;TGCGCCAAATGCGTTCAGAG;TTGTTAGGGAGGCTAATCCA;CAGCACTGATGGTGTAGGCA	-0.22;0.25;1.49;1.85	42352;53411;73885;75870	6.91E-01;5.61E-01;7.97E-01;3.56E-02	1572;3557;24031;35090	1.12E+00;1.94E+00;1.08E+00;1.38E+00
LOC105375503	0.840478	0.826351	1	AAGGAACTCTCATATCCACA	0.84	65891	0.0701	11551	0.826
LEPROT	0.840205	1.50925	5	TTGGCAATGAAATGGGGGAT;CGTGGCATTATCCTTCAGTG;CAGTTCCCGACAGGCACTAC;GCCGAGGCGGGCAGATCACG;AAGAATAACAGGAAATCCAA	-0.27;0.14;0.31;1.75;2.27	41407;50932;54872;75411;76858	9.02E-01;7.61E-01;5.20E-01;9.29E-01;1.64E-02	584;2031;22570;26510;36035	1.44E+00;2.20E+00;9.06E-01;1.35E+00;1.66E+00
LOC107984204	0.839769	0.825863	1	AGGTACCCTCCGACCCACCA	0.84	65878	0.0702	11564	0.826
ZNF326	0.839489	1.71615	6	CAAGGCAGGCAGATCACCTG;AAAAGCGGCGAATTGAGGCT;TATGGCATGGACAATCACAG;CATATGAAGCCTGCACCTGT;GCCGAGGCGGGCAGATCACG;AGAGTCAAGGCTATTCCGGT	-0.53;-0.27;0.96;1.01;1.75;2.13	36237;41410;67790;68637;75411;76619	9.22E-01;6.97E-01;1.59E+00;9.22E-01;8.61E-01;2.78E-02	823;2031;8805;9652;36032;41205	1.22E+00;2.03E+00;1.69E+00;2.56E+00;1.16E+00;1.64E+00
GANAB	0.838242	1.39464	4	AAGATGCCCAAGTCGCGATG;ACATCTGGTACACGGTATCG;ATTCCGCCTTGACCTACTAG;TGGCAAGCGGTATTTCACCT	0.26;0.64;0.86;1.59	53820;62116;66236;74547	1.10E+00;8.21E-01;4.41E-01;6.62E-02	2895;11206;15327;23622	8.75E-01;1.04E+00;1.60E+00;2.06E+00
PSENEN	0.837522	1.70391	4	CTGTGCCGGAAGTACTACCT;CCTGGAGCGAGTGTCCAATG;ACAGAACAGAGCCAAATCAA;TGAGCACTATCACCCAGAAG	-1.59;1.32;1.33;2.29	23119;72400;72469;76883	3.85E-01;1.65E+00;6.77E-01;1.26E-02	559;4973;5042;54323	1.55E+00;1.66E+00;2.99E+00;6.16E-01
PHLDA2	0.836383	1.52138	4	GCTCCACGCAGTCCACCTTG;CCCGACGAGGTGCTACGCGA;CATCGTCACCACCGACCACA;CAGCTATGGAAGAAGAAGCG	-1.28;1.0;1.11;2.52	26045;68456;70000;77110	4.05E-01;1.20E+00;5.47E-01;7.44E-03	332;7442;8986;51397	1.77E+00;1.34E+00;2.26E+00;7.12E-01
ID4	0.835646	1.40227	4	CAGGCACAGCGCCGGCTCGT;CGCAGCCCGACGGCGCCTTG;ACGACTGCTATAGCCGCCTG;GCACGTTATCGACTACATCC	0.25;0.42;1.24;1.44	53513;57277;71556;73485	1.09E+00;6.53E-01;6.20E-01;9.11E-02	3957;5886;20165;23929	7.58E-01;1.53E+00;1.28E+00;2.04E+00
PCLO	0.835003	1.79645	6	TCCCAATCCTCATTTAACGG;CAAGGCAGGCAGATCACCTG;AGCCATTGGCTCAACAACCA;GCCGAGGCGGGCAGATCACG;CAGGACCCCAGTATTGTGTG;TAGAAGTTACCATAGTACCC	-0.65;-0.53;0.36;1.75;1.8;2.28	34189;36237;56117;75411;75678;76868	8.42E-01;5.80E-01;7.99E-01;2.03E+00;9.15E-01;1.94E-02	574;1764;2031;21325;41205;43253	1.37E+00;2.15E+00;3.48E+00;1.34E+00;9.22E-01;1.52E+00
TNFRSF13C	0.834696	1.60247	4	ACCGTCCTTGTCTCCGTCGG;TGAGCTGGAGGCGGCGACAG;GCGGGCTCCTGCGCACGCCG;GCCCGCAGGCCACGCAGTGG	0.7;0.82;0.9;0.92	63365;65461;66955;67171	1.71E+00;9.89E-01;4.56E-01;2.47E-01	10271;10487;11981;14078	4.61E-01;1.08E+00;1.90E+00;2.96E+00
ASPHD1	0.834001	1.54641	5	GGCCTGGGCGCTGAATACCT;CGGAAGGCCTAGTGAGCCGG;GGGACTACCCCTCCGCCTCG;CCGGCCTCCGAGCATCCCAC;GCCGAGGCGGGCAGATCACG	-0.15;-0.06;0.9;1.72;1.75	44029;46009;66982;75293;75411	1.01E+00;6.27E-01;9.28E-01;9.07E-01;5.77E-02	2031;2149;10460;31433;33413	9.28E-01;2.15E+00;1.73E+00;1.09E+00;1.83E+00
CAV2	0.832982	1.31396	4	TCAAAGGAGTGCGTAGTCAC;GAGATGCGAGTTGAGCCGGT;ATTCCCGCAATGAAGGCCAG;TCTCGGGGTCGGCGTACTCG	-0.65;-0.08;0.92;3.14	34264;45501;67299;77355	5.13E-01;4.53E-01;4.64E-01;1.93E-03	87;10143;31941;43179	2.35E+00;1.11E+00;7.83E-01;1.01E+00
MESP2	0.831974	1.34613	4	CGCTCGTCTGGGCGTCGTCG;ACGGGGGCGACTGTATCTTG;TGAGACCCAGCACGGCCGAT;GCACGAACCCGACGAATCGG	-0.05;0.69;0.8;1.89	46174;63168;65082;76000	8.04E-01;8.68E-01;4.21E-01;3.26E-02	1442;12360;14274;31268	1.15E+00;9.67E-01;1.69E+00;1.58E+00
PNMA5	0.831183	1.39257	4	AAAGGTGGGGATCTAACTTG;CAACAATGACTCCATAACTG;TTTCTCTCCAATCTTCGGAG;CCACCTCACTACACTCCATG	-0.19;0.63;1.4;1.48	43100;61791;73164;73832	7.12E-01;8.07E-01;7.30E-01;8.29E-02	3610;4278;15651;34342	7.92E-01;1.79E+00;1.58E+00;1.41E+00
DUOXA1	0.830648	1.37976	4	AGGCATGGAGAGCATCACAT;GGTGACCAGCTTATTCATCG;TGAGACCATCAATTACAACG;ACTGGCGGTATAGGCCACAT	-0.3;0.84;1.07;1.71	40761;65924;69501;75209	6.50E-01;1.02E+00;5.28E-01;5.08E-02	2233;7941;11518;36681	9.76E-01;1.29E+00;1.95E+00;1.30E+00
RIC3	0.829238	1.52066	5	CCTTTGCAAATGCCTCGGCA;GTAGTGGAAGAGGTCTGATG;TGGTGATGATGCATCATAGG;TTTCAGACTGTATCAAGCGT;GCCGAGGCGGGCAGATCACG	-0.15;0.55;0.8;1.19;1.75	44004;60314;65169;70977;75411	1.01E+00;1.18E+00;8.25E-01;5.31E-01;5.77E-02	2031;6465;12273;17128;33438	9.28E-01;1.27E+00;1.55E+00;2.03E+00;1.82E+00
ZMYM3	0.827535	1.39867	4	TGGAGAACAGCAACACAGTG;TGACCCCTGTTACTACAACA;TCCACGAGGGCCAACAAAAG;CTTGAGCGTAGGGACATGCG	-0.43;0.75;1.37;1.62	38145;64178;72878;74756	5.89E-01;9.18E-01;7.07E-01;6.13E-02	2686;4564;13264;39297	9.04E-01;1.73E+00;1.78E+00;1.18E+00
CD82	0.826632	1.52944	4	AGCAGGAAAGCAAAGTACTG;AGACTACAACAGCAGTCGCG;TGAGCTCATGAATCGCCCTG;CCAGCCGCAGCACTTCACCT	0.54;0.8;0.97;1.0	60064;65083;68000;68478	1.46E+00;9.67E-01;4.81E-01;2.14E-01	8964;9442;12359;17378	4.95E-01;1.16E+00;1.86E+00;2.60E+00
UBALD2	0.826587	1.44897	4	TTGGAAGAACGTGCTCAGCG;CATGATCAACCAGTTCGTGC;AGAACATGGCCAGCGCATCG;AAGGGGCTGAAGTTTGCAGG	-0.19;0.98;1.23;1.29	43078;68206;71418;72070	7.11E-01;1.18E+00;6.13E-01;1.25E-01	5372;6024;9237;34364	6.50E-01;1.51E+00;2.22E+00;1.41E+00
TCEAL7	0.826403	1.35269	4	AGGGAGGAAAAACGCCCGTA;TTTGAACGCCAGCAAACAGA;GTGCAGCGTGCCAAAGAGGG;AAACCCTGCAAAGAAAACGA	-0.44;0.76;0.99;1.99	37964;64444;68343;76295	5.85E-01;9.32E-01;4.91E-01;2.59E-02	1147;9099;12998;39478	1.25E+00;1.19E+00;1.80E+00;1.17E+00
FBXO11	0.826212	1.64117	6	CAAGGCAGGCAGATCACCTG;CCAGCATGGTGGGATTTATG;AACCACTGTAGGGTTAGCAT;ATATATAACAGATCATGCAC;GCCGAGGCGGGCAGATCACG;AGAGCCTTCCATAAAAACGA	-0.53;-0.34;0.56;1.15;1.75;2.37	36237;39900;60453;70492;75411;76971	9.22E-01;6.58E-01;9.98E-01;1.08E+00;8.61E-01;1.59E-02	471;2031;6950;16989;37542;41205	1.45E+00;2.03E+00;1.96E+00;1.67E+00;1.08E+00;1.64E+00
WNT5B	0.825591	1.38371	4	AGACCCGAGATGTTTATCAT;TGCCATCTTATACACAGCCT;GCACATGGCCTACATAGGGG;GCGGTGGAATTGCAGCACAG	-1.11;0.57;0.94;2.9	27876;60636;67509;77301	4.23E-01;7.61E-01;4.69E-01;3.14E-03	141;9933;16806;49566	2.14E+00;1.12E+00;1.49E+00;7.75E-01
DSTNP4	0.8254	0.815986	1	AAGTGCATCATTGTAGAAGA	0.83	65612	0.072	11830	0.816
LOC100287896	0.825375	1.00366	2	GCCCGCCTCAGTCCCCGACG;GCCACCCGGTACTCGACCTG	0.13;1.52	50785;74083	3.45E-01;3.85E-02	3359;26657	1.08E+00;9.26E-01
SIAE	0.824447	1.80155	5	ACTGCAAGTCAACCGCAACA;ACCCACTACCGAATTCCACA;CCTGTGGGGTCCCTAAACAA;AAAGGGGTAGTATGGTACCA;TGGCGTGAAACCTTCCACCG	-1.22;0.11;1.72;1.72;1.79	26684;50275;75241;75286;75615	4.98E-01;7.40E-01;2.13E+00;9.06E-01;5.18E-02	1827;2156;2201;27167;50758	9.70E-01;2.15E+00;3.66E+00;1.31E+00;9.17E-01
OR52N5	0.823849	1.3592	4	AGTGTGGTAGCATAACGCAA;CAGCAATACACCCCTCAGGA;CATGTGGTCGCAGTACGTAT;CAAGACCAAGATTCCCCACA	-0.05;0.64;1.17;1.53	46130;62106;70760;74199	8.03E-01;8.20E-01;5.80E-01;7.43E-02	3243;6682;15336;31312	8.32E-01;1.43E+00;1.60E+00;1.57E+00
NEXMIF	0.823801	1.71994	6	CAAGGCAGGCAGATCACCTG;TAGAAATGTGTGGCCCAACA;GATGATGATGAATCAACACT;GAAGCAGAGAAACACCAACA;CCTTAAATAAACCATGCAGT;GCCGAGGCGGGCAGATCACG	-0.53;0.56;0.75;1.0;1.42;1.75	36237;60481;64211;68452;73316;75411	9.22E-01;1.68E+00;1.25E+00;9.09E-01;6.14E-01;6.92E-02	2031;4126;8990;13231;16961;41205	8.61E-01;1.47E+00;1.67E+00;2.06E+00;2.63E+00;1.64E+00
RBM4B	0.822591	1.35454	4	GCTCTTGGTTGGTACAAGTG;AGTTCGAACACCTTACACCA;CGACTACTATAAGCGATACC;ACTCTGGTCTCCCATACCAG	-0.13;0.54;1.29;1.59	44313;60067;72133;74556	7.47E-01;7.41E-01;6.54E-01;6.60E-02	2886;5309;17375;33129	8.76E-01;1.61E+00;1.46E+00;1.48E+00
ZSCAN29	0.821908	1.42776	5	CAAGGCAGGCAGATCACCTG;AGGATACTGAGATACCCCCA;GCCATTTCCTAAATCCGGTG;CAGTCTGGCTGAGAATTGCG;AGCTATCGGAAAGTCAAGAG	-0.53;0.12;0.78;1.01;2.73	36237;50451;64805;68648;77239	7.27E-01;7.46E-01;8.07E-01;4.55E-01;5.67E-03	203;8794;12637;26991;41205	1.89E+00;1.05E+00;1.52E+00;1.32E+00;1.37E+00
NFE4	0.821632	1.30215	4	ATGCACAGAGAAGCAACTGG;GCTCCGGTCTTCGTCCCCCG;CACACTCTCAAGAGTTTGAA;CAAACCCAGGTAAACCCACG	-0.24;0.47;0.57;2.49	41996;58499;60565;77083	6.82E-01;6.89E-01;3.80E-01;8.05E-03	359;16877;18943;35446	1.74E+00;7.59E-01;1.35E+00;1.36E+00
LOR	0.821116	1.4364	4	GGGAGCGTCAAGTACTCCGG;GTCTGCGGCTACTCTGGCGG;TCTGGCTGCGGCTACTCCGG;GACTGCGTGAAGACCTCTGG	-0.22;-0.17;1.79;1.88	42484;43501;75606;75983	6.95E-01;4.39E-01;1.05E+00;3.30E-02	1459;1836;33941;34958	1.15E+00;2.49E+00;7.23E-01;1.38E+00
KDM1A	0.820617	1.53229	4	TGAGAAGTCATCCGGTCATG;CTAAATAACTGTGAACTCGG;TTTCTGAAACAGGATCGTGT;TGGAATAGCAGAGACTCCGG	0.57;0.84;0.86;1.02	60563;65863;66216;68749	1.49E+00;1.01E+00;4.41E-01;2.07E-01	8693;11225;11579;16879	5.03E-01;1.04E+00;1.94E+00;2.65E+00
COL26A1	0.819428	1.50384	5	CCGTCCGTGTCACTGTGTGA;GGTCGGCGGAGTGCTCTCGG;TCGGTCACCTTTAGACCCGG;CGTGCGGTAGGACACTCTGT;GCCGAGGCGGGCAGATCACG	-0.15;0.47;0.54;1.48;1.75	44042;58574;60014;73829;75411	1.01E+00;1.08E+00;6.28E-01;7.15E-01;5.77E-02	2031;3613;17428;18868;33400	9.28E-01;1.72E+00;1.16E+00;1.88E+00;1.83E+00
MYOZ2	0.817566	1.56844	5	TAAGTACTATCAATCTCCCT;AATCCAGACAACATTGCTCC;GCCATCATGAAGGAAGTCCA;GTGGATGGAAGTAACTTGGA;GCCGAGGCGGGCAGATCACG	0.43;0.47;0.5;0.93;1.75	57663;58560;59245;67411;75411	1.80E+00;1.08E+00;6.07E-01;4.30E-01;5.77E-02	2031;10031;18197;18882;19779	9.28E-01;9.56E-01;1.12E+00;1.87E+00;2.96E+00
HSPA14	0.817525	1.79669	5	ACAAGCTCAGAAATACATCG;CAAGGCAGGCAGATCACCTG;CAACAACAGCTGGAGTAACT;AGAAGCTAGATACTGTGCTA;AAGTGTATAGAAGCAATCAG	-1.0;-0.53;1.67;1.84;2.11	29228;36237;75069;75816;76583	5.47E-01;4.82E-01;2.07E+00;1.02E+00;2.42E-02	859;1626;2373;41205;48214	1.28E+00;2.38E+00;3.57E+00;7.27E-01;1.03E+00
OR6C75	0.817234	1.40327	4	TGCAGCAGAAGCATTACTGG;AAAAGTACAACCTGCCACTG;CCAGGAATGAGAAGTTCCGA;TTCCTGTCACAACAGTGACA	0.05;0.86;1.01;1.36	48786;66160;68589;72774	8.94E-01;1.03E+00;4.98E-01;1.08E-01	4668;8853;11282;28656	6.99E-01;1.21E+00;1.98E+00;1.73E+00
ARMCX2	0.817048	1.46889	4	GGGTGTCCGCGATCTCAGGA;CGGGGTGGCATCGCCTACCG;AAGTTGAAGTAGACGAACTG;TGCAATAGCACCACCTCCCG	-0.1;1.07;1.14;1.16	45040;69460;70362;70614	7.69E-01;1.29E+00;5.62E-01;1.60E-01	6828;7079;7982;32402	5.73E-01;1.38E+00;2.41E+00;1.51E+00
MT2P1	0.816759	0.810007	1	GGTGACTCCTGCACCTGCGC	0.82	65448	0.0731	11994	0.81
WSCD1	0.816269	1.33949	4	CCGGCTCTCCGTGTACCGTG;ATTGGATGCTTCAGTGACGA;ACACTCGTTGTACAGACAGG;CCCGCAGTAACACTCCGCCC	-0.18;0.57;1.23;1.64	43345;60557;71487;74893	7.19E-01;7.58E-01;6.16E-01;5.81E-02	2549;5955;16885;34097	9.24E-01;1.52E+00;1.49E+00;1.43E+00
ST3GAL6	0.815175	1.80785	5	CAGGACCATTATTCATTCTG;TTAAGCCACATGATTTAAGG;CATACCCTGTAAAAAGTGTG;GCCGAGGCGGGCAGATCACG;ATAAGTTTGATTTGCCCTAT	-1.57;0.39;1.55;1.75;1.96	23240;56781;74305;75411;76195	4.44E-01;9.91E-01;1.84E+00;9.29E-01;3.52E-02	1247;2031;3137;20661;54202	1.12E+00;2.20E+00;3.21E+00;1.73E+00;7.75E-01
KIAA2012	0.81401	1.48178	5	CAAGGCAGGCAGATCACCTG;GGAGCCAAGAGTGATCGATG;GAAACTCACCACAACGACCA;ACTGCCCCAGAGGTCCCTGG;TCAGCCAAGAGATACCTCCG	-0.53;-0.4;1.08;1.19;2.73	36237;38788;69578;71011;77237	7.27E-01;5.06E-01;1.13E+00;5.32E-01;5.73E-03	205;6431;7864;38654;41205	1.88E+00;1.27E+00;2.07E+00;8.08E-01;1.37E+00
LOC101928816	0.812338	1.28871	3	TTTATTACAATTAGGCCCAG;AGTCAAGCATCTGACATGAT;GCATGAGATGGGGAACCCGA	0.59;0.89;0.96	60932;66724;67920	9.70E-01;5.11E-01;1.71E-01	9522;10718;16510	5.47E-01;1.31E+00;2.01E+00
TOM1L2	0.811166	1.50332	5	AGAGCGTCCAAGTCTGCCAT;ACGTCTTCCTTCGATACGAG;CGGGAACCGGAACTACAGAG;GTGCTTGCTCTGATCCAGGT;GCCGAGGCGGGCAGATCACG	-0.31;0.12;0.95;1.56;1.75	40471;50450;67662;74352;75411	8.67E-01;7.45E-01;9.73E-01;7.71E-01;5.77E-02	2031;3090;9780;26992;36971	9.28E-01;1.85E+00;1.81E+00;1.32E+00;1.61E+00
LRRC36	0.810549	1.61313	5	CAAGGCAGGCAGATCACCTG;CAACTGACTAAAATGCAGCT;TCACTAAGCCCATCGAAGAG;CTAAGTACTTCTGCAACTCA;TCCACAGGAATGTGAAGCGG	-0.53;0.58;1.25;1.35;1.41	36237;60855;71666;72660;73220	7.27E-01;1.22E+00;1.36E+00;6.21E-01;1.22E-01	4222;4782;5777;16588;41205	6.62E-01;1.50E+00;2.45E+00;2.08E+00;1.37E+00
LOC105372485	0.809815	1.01095	2	CCATACCTCCCCTACACCAG;GCAGTACCCGCTCATGCGTG	0.5;1.12	59238;70079	4.44E-01;8.68E-02	7363;18204	7.64E-01;1.26E+00
LOC101927418	0.809744	1.27585	4	ACATGGAAACTTGATAAGAC;AATGAAGAGAGAGTTCCCTA;ATAGTAAAAACACCCCCCCA;TCGAGTTGGGCATCGCCAGT	-0.2;0.25;0.65;2.53	42912;53432;62327;77121	7.07E-01;5.61E-01;3.90E-01;7.19E-03	321;15115;24010;34530	1.79E+00;8.30E-01;1.08E+00;1.40E+00
C14orf28	0.809744	1.27585	4	ACATGGAAACTTGATAAGAC;AATGAAGAGAGAGTTCCCTA;ATAGTAAAAACACCCCCCCA;TCGAGTTGGGCATCGCCAGT	-0.2;0.25;0.65;2.53	42912;53432;62327;77121	7.07E-01;5.61E-01;3.90E-01;7.19E-03	321;15115;24010;34530	1.79E+00;8.30E-01;1.08E+00;1.40E+00
CYP26C1	0.809488	1.32831	4	GAGGCGTCGTAGACTGAGAC;CTCGCACACACTGCTAGGTG;CCACTGAAGGGAACGTCCAG;AGCGCTCTCGGCGAGAACTG	0.0;0.56;1.09;1.59	47575;60408;69684;74589	8.51E-01;7.53E-01;5.35E-01;6.52E-02	2853;7758;17034;30096	8.80E-01;1.31E+00;1.48E+00;1.64E+00
RBFOX2	0.809144	1.89698	6	GGAGGAAGAAGCGAATGCGC;GTGTGGCACCCCATACTCTG;AGAGACATGCAGCCGTTTCG;TATGGTCCGGAGTTATATGC;GCCGAGGCGGGCAGATCACG;CGGAAGTACGCAAGCCCACG	-2.61;0.53;0.61;1.25;1.75;3.33	13751;59880;61345;71690;75411;77383	3.97E-01;1.63E+00;1.05E+00;1.22E+00;8.61E-01;1.95E-03	59;2031;5752;16097;17562;63690	2.34E+00;2.03E+00;2.19E+00;1.76E+00;2.56E+00;5.09E-01
SLC24A4	0.80883	1.50998	5	TATATGATGAACAAATTGTG;AACGTGTCCTGCCAGACACG;GTAAGCCGCTTCAAAACGGG;TCACCAATAAGTTTGGACCC;GCCGAGGCGGGCAGATCACG	-0.49;0.28;0.8;1.7;1.75	36988;54141;65221;75196;75411	7.50E-01;8.76E-01;8.28E-01;8.90E-01;5.77E-02	2031;2246;12221;23301;40454	9.28E-01;2.11E+00;1.55E+00;1.54E+00;1.41E+00
USP22	0.80857	1.4028	4	GCCATTGATCTGATGTACGG;TGGGGCTCTGCATCTCACAG;ACCTGGTGTGGACCCACGCG;CCTCGAACTGCACCATAGGT	0.03;0.84;1.09;1.28	48375;65817;69817;71968	8.79E-01;1.01E+00;5.40E-01;1.27E-01	5474;7625;11625;29067	6.44E-01;1.33E+00;1.94E+00;1.70E+00
RPS6KL1	0.807824	1.48822	4	GGAGCAGATTCGCAACAGGG;AAATTACCAAATACCTGCGG;AACCCAAGTGAGCCCCCGAG;CGGCTGACCATCATCCCACA	-1.16;0.94;1.36;2.1	27354;67486;72742;76558	4.18E-01;1.12E+00;6.96E-01;1.99E-02	884;4700;9956;50088	1.36E+00;1.71E+00;2.13E+00;7.57E-01
IQCA1L	0.807561	1.30461	4	GGCACTCGATAAACCACTGT;TCGAATCTCTCGCATGAAGG;TGTCGTATGTCAAACAGGGA;TGGGGTGTATGCTCTCACAC	-0.04;0.32;1.12;1.82	46444;55188;70176;75783	8.13E-01;5.99E-01;5.54E-01;3.76E-02	1659;7266;22254;30998	1.10E+00;1.36E+00;1.17E+00;1.59E+00
CCDC15	0.807348	1.37112	4	CTATGAAACAGGCACGTCAC;GAGTGTTAAGCCAGATACCC;AACTGACACTCACATATGCT;GGTCTCTAGATAAAAAGTCC	0.13;0.56;1.19;1.34	50840;60467;71034;72570	9.73E-01;7.55E-01;5.93E-01;1.13E-01	4872;6408;16975;26602	6.84E-01;1.46E+00;1.48E+00;1.86E+00
FAM133DP	0.806663	0.803359	1	AAAGAAAAAGAAAGGCTCCA	0.81	65263	0.0743	12179	0.803
KRTAP26-1	0.80636	1.38627	4	GGCTGGTAACTATTGAGCAG;CCGCTGGACACATACCTCTG;GACAACTGCCAAGAGACCTG;GTATGGTCTTGAGAGCTAGT	0.31;0.54;1.08;1.31	54803;59925;69539;72295	1.15E+00;7.36E-01;5.29E-01;1.19E-01	5147;7903;17517;22639	6.65E-01;1.30E+00;1.45E+00;2.14E+00
ARL13A	0.806011	1.61438	5	CAAGGCAGGCAGATCACCTG;GGACAACAGAAGAGACACGA;ATGGCCAAACTACTATGCAC;TGACACTTACTACTCGGCAT;TCTGCTGTCCGATAAAAGAG	-0.53;0.47;1.34;1.35;1.4	36237;58491;72590;72724;73137	7.27E-01;1.08E+00;1.49E+00;6.25E-01;1.24E-01	4305;4718;4852;18950;41205	6.55E-01;1.51E+00;2.67E+00;1.87E+00;1.37E+00
PEX6	0.805479	1.55171	4	AGGGACTGGAGATTCACTAG;AGCATTTCCTCATGAGCTCG;TGGGACCTCTCTGATAGACT;ACTAGCAGTGTCCTTCTACG	-1.11;1.15;1.43;1.75	27902;70443;73434;75440	4.23E-01;1.39E+00;7.53E-01;4.55E-02	2002;4008;6999;49540	1.02E+00;1.84E+00;2.57E+00;7.76E-01
SELENOK	0.805211	1.40098	4	CTTATCTGTAGGACAAGTGT;TCTGATTCCAGATATGATGA;ATCTCCATGGAGACTGACTC;TTGATAACAGATTTCTTCTG	0.3;0.53;1.19;1.21	54595;59697;70951;71204	1.14E+00;7.28E-01;5.89E-01;1.46E-01	6238;6491;17744;22847	6.01E-01;1.45E+00;1.43E+00;2.12E+00
LOC100506142	0.805023	1.059	2	AGACGGTCATAGTCTTCCTG;GAAGCATATAAGGAAGACAT	-0.33;1.94	40164;76147	3.02E-01;1.46E-02	1295;37279	1.48E+00;6.35E-01
DMWD	0.803819	1.4922	5	TGACGTTGTACAGGTACAGG;GGCCCAAGTTGAAGCAGACG;CGCCACCCGTCACCACGTAG;GCCGAGGCGGGCAGATCACG;GAGAAGGCGAACTCGTTGAG	-0.73;0.3;0.48;1.75;2.23	32999;54658;58625;75411;76797	6.36E-01;8.97E-01;5.92E-01;9.29E-01;1.81E-02	645;2031;18817;22784;44443	1.39E+00;2.20E+00;1.09E+00;1.58E+00;1.21E+00
RAB39B	0.803199	1.33688	4	CCTGATCCGCCGCTTCACCG;AGTGTGACCTGGATACACAG;GCCTACTACAGGAACTCAGT;GTTCCGGCTCATTGTCATCG	-0.05;0.21;1.41;1.64	46271;52652;73214;74870	8.07E-01;5.46E-01;7.34E-01;5.87E-02	2572;4228;24790;31171	9.21E-01;1.80E+00;1.05E+00;1.58E+00
ZBTB46	0.803184	1.82803	5	GGCCGAGCTCTATGCACAGG;CCTGCATCAGGCCACCGCGG;CCTTCCTGCCGACGTCGGGG;CAGCACGGAAGCTCTCATCT;GCCGAGGCGGGCAGATCACG	-1.38;1.17;1.24;1.24;1.75	25023;70747;71553;71585;75411	4.70E-01;2.27E+00;1.34E+00;5.59E-01;5.77E-02	2031;5857;5889;6695;52419	9.28E-01;1.35E+00;2.43E+00;3.59E+00;8.47E-01
FAM53A	0.802726	1.50669	5	CTCACACCATGGGTCTTCAG;GACTCCGCGGAACACCAGAG;GCAATGCCGCTTGGTCGGTG;GTCGACCACACAGCACTCCT;GCCGAGGCGGGCAGATCACG	-0.48;0.62;0.69;1.44;1.75	37102;61583;63111;73514;75411	7.54E-01;1.27E+00;7.32E-01;6.86E-01;5.77E-02	2031;3928;14331;15859;40340	9.28E-01;1.66E+00;1.38E+00;2.16E+00;1.42E+00
HIST1H3F	0.802517	1.42162	4	CGACAGTACCAGGCCTGTAG;GATAGCGGCGGATTTCACGG;CGATCTCACGTACCAGACGC;ACAGCTCGTAAGTCCACTGG	0.46;0.61;0.91;1.23	58220;61539;67055;71436	1.34E+00;7.97E-01;4.58E-01;1.40E-01	6006;10387;15903;19222	6.13E-01;1.09E+00;1.56E+00;2.42E+00
FBXL2	0.802369	1.94778	8	CAAGGCAGGCAGATCACCTG;CCTTCATCCGTGATACGCTG;TTTACTCCACGGAAGCACGG;GGATTTGACTTACTTCAAGG;GGTGATTCTCTGGCAAAGCG;CTGTGGGAATAATTGACACA;GTTTGTAATAGACACACAGG;CAGTGTACTCACTGCAGTCG	-0.53;-0.11;0.43;0.76;1.06;1.35;1.63;1.83	36237;44771;57508;64482;69297;72695;74830;75807	1.35E+00;1.28E+00;1.59E+00;1.58E+00;1.43E+00;1.14E+00;6.73E-01;7.41E-02	1635;2612;4747;8145;12960;19934;32671;41205	8.37E-01;1.59E+00;2.03E+00;2.26E+00;2.37E+00;2.35E+00;1.96E+00;2.19E+00
ARHGEF39	0.80142	1.69837	5	TACGACGAGATTCTCATACC;AGAAAAATAAAGGTTTCCGG;ATTGGTTATAGAGCTCCAAG;AACTGCGGTTCTCCACGAGG;ACCATCAACAGCTCACACGT	0.53;0.64;0.86;0.93;1.05	59794;62057;66221;67358;69226	1.98E+00;1.30E+00;8.82E-01;4.29E-01;2.44E-01	8216;10084;11221;15385;17648	4.70E-01;9.52E-01;1.65E+00;2.20E+00;3.21E+00
GPAT4	0.801112	1.88688	4	GTAGAGTTTGCGGATACCAA;CTTTACAAGCCCTACACCAA;GATGATCACATCGATCGGTG;AGCGCTCAAACCAGACGTGT	-2.43;1.25;1.79;2.6	15678;71656;75611;77164	3.86E-01;1.54E+00;1.06E+00;6.23E-03	278;1831;5786;61764	1.85E+00;2.50E+00;2.81E+00;3.93E-01
INHBE	0.800053	1.32734	4	CCCTCCGGAGACTACAGCCA;CTCACCCCTCAAGCCACTAG;GGGCACTGGTGCGAGCACAG;GCACAGTTACTGGACAACCG	0.15;0.58;0.81;1.65	51288;60762;65376;74970	9.91E-01;7.66E-01;4.26E-01;5.63E-02	2472;12066;16680;26154	9.36E-01;9.84E-01;1.50E+00;1.89E+00
GSG1	0.79971	1.35474	4	GACTTGTGAATACATCATGT;ACAATACAACTGGGAGACTG;GCGTTCCCAGGGATAACCAT;GCAAGTCTGTTAGTAGCAGG	-0.59;0.33;1.52;1.94	35309;55360;74091;76142	5.32E-01;6.03E-01;8.19E-01;2.94E-02	1300;3351;22082;42133	1.20E+00;1.99E+00;1.18E+00;1.06E+00
OR2V1	0.799141	1.30228	4	TCTCTCTTGTGGGATCTGAG;TTACTGTGGCTCAAGGAGCG;CAATGTTACAGACCAACATG;AGTTATGGTGGTCTTCACAG	0.0;0.22;1.14;1.84	47461;52741;70337;75853	8.47E-01;5.48E-01;5.61E-01;3.60E-02	1589;7105;24701;29741	1.11E+00;1.38E+00;1.05E+00;1.66E+00
ZNF793	0.798314	1.37841	4	TATCACACTTACCCCAACAG;TCACAGTGACTGCAACCCCG;CCTAGTAACTGGAACCCTTG;TCCCACACTCACTACAGACG	0.42;0.53;0.79;1.46	57406;59801;64906;73619	1.29E+00;7.31E-01;4.19E-01;8.79E-02	3823;12536;17641;20036	7.70E-01;9.57E-01;1.44E+00;2.35E+00
NYNRIN	0.797859	1.30266	4	TTAGAACCTCCGGATCGGAG;TGTAGCCAGACTTCTGAGTG;CCTGACTATGAAGCCCTAGT;ACCGGCACACCTATAATCGT	0.19;0.22;0.71;2.08	52090;52798;63399;76516	1.03E+00;5.49E-01;4.00E-01;2.09E-02	926;14043;24644;25352	1.34E+00;8.79E-01;1.06E+00;1.94E+00
CHCHD4P4	0.795606	0.796671	1	TGACCCCAACGATCCATACG	0.8	65074	0.0756	12368	0.797
ZBTB40	0.79516	1.49393	5	ATATTGGTACAGCCTCAACA;TGTAGTAGGAGTCTCCGCTG;AAACGTGACTCTGGTTCAGG;GGTGATTCTGAATTGCTGTG;GCCGAGGCGGGCAGATCACG	-0.33;-0.04;0.94;1.67;1.75	40103;46349;67524;75020;75411	8.54E-01;6.35E-01;9.64E-01;8.61E-01;5.77E-02	2031;2422;9918;31093;37339	9.28E-01;2.05E+00;1.80E+00;1.11E+00;1.58E+00
JAK3	0.794914	1.28678	4	GTGTACAAATTCCTGCACCA;AGCTCTCGAAGACTGCTGTG;TGACGCGGAGGCGTATTCGG;ACTCTCCAGGCTTAACACAG	-0.24;0.09;1.21;2.12	41932;49906;71189;76600	6.80E-01;5.02E-01;6.01E-01;1.90E-02	842;6253;27536;35510	1.38E+00;1.48E+00;9.36E-01;1.35E+00
ALS2CL	0.794281	1.34895	4	GTGAGCGCTACATTGGCATG;ACACGCAGCGAGTACTGGCG;GGAGGGCTCGTTCGGCAGTG;AGCACCGACGAGGTGTACAA	0.36;0.43;0.48;1.9	55940;57665;58811;76050	1.21E+00;6.64E-01;3.75E-01;3.15E-02	1392;18630;19777;21502	1.17E+00;6.98E-01;1.30E+00;2.23E+00
FAM212B	0.793067	1.4828	5	GCACCAAGTTTCCATCCCAT;TCGACAGCCTCTGGTGTTAG;GACTTGCCAGAACTGGAGAA;CTCTGCCACCCTCCCAACAA;GCCGAGGCGGGCAGATCACG	0.24;0.32;0.61;1.05;1.75	53331;55096;61423;69163;75411	1.49E+00;9.15E-01;6.71E-01;4.68E-01;5.77E-02	2031;8279;16019;22346;24111	9.28E-01;1.09E+00;1.25E+00;1.61E+00;2.53E+00
LOC100507586	0.792328	0.79457	1	TCGAAGCATTCAGCAAACAA	0.79	65014	0.076	12428	0.795
COX7BP2	0.792328	0.79457	1	TCGAAGCATTCAGCAAACAA	0.79	65014	0.076	12428	0.795
ARPP21	0.791916	1.331	4	AGTTCCATCGGGATTCACAA;GGTGCGGGACAGCGATCCTG;AGATTGCAGCCAAGAATACA;GAGGATGCTTGTCCATCGAG	0.15;0.33;1.21;1.48	51270;55240;71147;73831	9.91E-01;6.00E-01;5.98E-01;8.29E-02	3611;6295;22202;26172	7.91E-01;1.48E+00;1.17E+00;1.88E+00
LAMC2	0.791798	1.53285	5	TGTTACTGGCTGACTCAACG;CCTGTCCTTTGACTACCGTG;AGTGCTCGATGTGACAACTC;GCCGAGGCGGGCAGATCACG;GTTACTATAATCTGGATGGG	-0.86;0.06;1.02;1.75;1.99	31094;49118;68734;75411;76292	5.89E-01;7.06E-01;1.05E+00;9.29E-01;3.25E-02	1150;2031;8708;28324;46348	1.16E+00;2.20E+00;1.95E+00;1.25E+00;1.11E+00
SGSM3	0.791321	1.47097	5	GTTCACCCATAACCACGATG;CACACTGCACTGGTTCCTCA;GGCTGCCTGACAGATCGAGA;AGACCCCAAAAACTGCAGCG;GCCGAGGCGGGCAGATCACG	0.0;0.2;0.95;1.06;1.75	47752;52335;67639;69355;75411	1.18E+00;8.08E-01;9.72E-01;4.74E-01;5.77E-02	2031;8087;9803;25107;29690	9.28E-01;1.11E+00;1.81E+00;1.43E+00;2.08E+00
FAM120C	0.791045	1.77717	6	ATTACCTTAAGTGATGCAAG;CAAGGCAGGCAGATCACCTG;GAAGAGTCTGGTCCCAAAGG;GCCGAGGCGGGCAGATCACG;CAACTGATCGTGGGACACGT;TATTGAGGATGAGTGTAACA	-0.65;-0.53;-0.15;1.75;2.02;2.31	34243;36237;43853;75411;76390;76899	8.44E-01;5.80E-01;5.28E-01;2.03E+00;1.12E+00;1.83E-02	543;1052;2031;33589;41205;43199	1.39E+00;2.58E+00;3.48E+00;7.69E-01;9.22E-01;1.52E+00
LOC105379246	0.789655	0.998459	2	ATCATTAGAAATGAAGCTTC;CTGCAATGATAATATTCTGA	0.51;1.07	59379;69449	4.47E-01;9.46E-02	7993;18063	7.33E-01;1.26E+00
PDZRN3	0.789032	1.93991	5	TACGGCCTGTACTACCCTAG;CTTCACTGGATGATCCATCG;CATTGGGATTTATATCAGTG;GCCGAGGCGGGCAGATCACG;GATAGGGATCCAGCACGGGT	-2.17;0.96;1.37;1.75;2.04	18186;67834;72821;75411;76437	3.95E-01;1.83E+00;1.53E+00;9.29E-01;2.83E-02	1005;2031;4621;9608;59256	1.21E+00;2.20E+00;2.73E+00;2.98E+00;5.81E-01
GOT1L1	0.788634	1.36161	4	CAAGTACTCATAATTCAGGG;ACTGCAAGTTGACACCAAGT;CTGGTGTATAAACCTTGACA;GGACCCCAAGAAGCTATGCA	0.22;0.71;0.86;1.36	52733;63558;66260;72797	1.05E+00;8.86E-01;4.42E-01;1.07E-01	4645;11182;13884;24709	7.00E-01;1.04E+00;1.72E+00;1.98E+00
OR2H1	0.787895	1.30189	4	CACAACCACGAAGATGACAC;TTGAACCAGACTCATAACCC;CACAACTTGTGGTAAAGCAG;GATGGCCTTTGACCGATACG	0.1;0.48;0.9;1.67	50133;58721;66907;75039	9.45E-01;6.96E-01;4.55E-01;5.47E-02	2403;10535;18721;27309	9.47E-01;1.08E+00;1.37E+00;1.81E+00
ROCK2	0.78779	1.51585	5	TGTTTAGGGAGGTACGACTT;CAAGGCAGGCAGATCACCTG;ACCGGATTATATATCACCTG;TAGTAGGTAAATCCGATGAA;AGCTGAACATAAGGCCACAA	-0.62;-0.53;0.83;1.83;2.43	34739;36237;65741;75789;77031	6.83E-01;4.82E-01;8.55E-01;1.01E+00;1.15E-02	411;1653;11701;41205;42703	1.59E+00;2.37E+00;1.60E+00;7.27E-01;1.29E+00
PRAME	0.787654	1.48745	4	AGTAGATGGTTTGAGCACAG;GGAGAAAATTTCGCCAAGGT;ATCATCTTGATATCCTGCAT;CCTTCATCAGCACTCCCAGA	0.6;0.76;0.78;1.02	61110;64331;64734;68851	1.53E+00;9.26E-01;4.16E-01;2.04E-01	8591;12708;13111;16332	5.06E-01;9.47E-01;1.79E+00;2.70E+00
LOC105371768	0.787057	1.00461	2	TTACAACCGGTAGAGAATGG;ATGAGCATCTTCGGGAACCA	0.55;1.03	60140;68907	4.60E-01;1.01E-01	8535;17302	7.07E-01;1.30E+00
GNRH2	0.787048	1.35314	4	CAGGGCATGCTGTCGTCCAG;ACACCCACCTGGGGGCCTAA;GAGCCTCTGAGGGTCCAAGG;GGCATCACTTGGGAGGCCAT	0.42;0.44;0.54;1.75	57342;57830;59972;75432	1.29E+00;6.68E-01;3.78E-01;4.57E-02	2010;17470;19612;20100	1.02E+00;7.37E-01;1.31E+00;2.34E+00
MAGEE1	0.786905	1.34985	4	CTATCCGGGAGTCTGAAATG;GGAGGTGTCCGATCCATCAG;GGCCTAGAATCATCATCAGG;CTCAGAATCTGAGTCCACGG	-0.64;0.52;1.45;1.83	34389;59513;73547;75791	5.15E-01;7.21E-01;7.64E-01;3.74E-02	1651;3895;17929;43053	1.10E+00;1.86E+00;1.42E+00;1.02E+00
ABRA	0.785152	1.32808	4	GAATGCATTCACTTACTGGG;CCTGGTGTCTGAGCTAACCA;GAAAGAGGTGTCCAAAACGG;CCTCAGCCACAGGTACGAGA	-1.0;0.35;1.16;2.63	29149;55741;70666;77182	4.38E-01;6.12E-01;5.75E-01;5.82E-03	260;6776;21701;48293	1.88E+00;1.42E+00;1.20E+00;8.20E-01
PTPN21	0.784843	1.39715	5	CAAGGCAGGCAGATCACCTG;GCACAAACGGAACAGCATCG;ACCACTCCAAAATAGACGGT;CATTACGGATCCGACCGTTG;TCGCTGCGAAACCTCAACAT	-0.53;0.22;0.24;1.38;2.61	36237;52834;53343;72957;77169	7.27E-01;8.26E-01;5.00E-01;6.42E-01;7.64E-03	273;4485;24099;24608;41205	1.76E+00;1.55E+00;8.45E-01;1.46E+00;1.37E+00
NRIP3	0.784835	1.34888	4	TAGGCAGCCTGTGTCAACCA;GCCGCAAGGAGACCGACATG;TGTTCGTCTTAGAGGCCCAA;TCAATCAGGCTAAGTCTGAG	-0.78;0.52;1.4;2.0	32238;59625;73134;76313	4.80E-01;7.25E-01;7.27E-01;2.55E-02	1129;4308;17817;45204	1.25E+00;1.78E+00;1.43E+00;9.35E-01
TMEM42	0.784639	1.27667	4	CGTCTTAGGCATTATTGTGA;AGTTGAATACGCCCCAAAAG;ATGTGGACCTTCTTTAGCCG;GAGGTGCGGAGGGAATTCCG	-0.06;0.18;0.34;2.69	45904;51806;55475;77211	7.96E-01;5.31E-01;3.80E-01;5.17E-03	231;21967;25636;31538	1.93E+00;6.06E-01;1.01E+00;1.56E+00
KLK9	0.784037	1.39719	4	GGGGGAAGAAGTCCGTAACC;CACAGAAGAGCCGAGTAAGG;AGGTATCTGTGGGTCCGCCT;TTCCTCGGCCCCGATGGCAC	0.52;0.54;0.71;1.36	59670;59919;63551;72793	1.43E+00;7.35E-01;4.02E-01;1.08E-01	4649;13891;17523;17772	7.00E-01;8.86E-01;1.45E+00;2.56E+00
GJA8	0.781741	1.28966	4	CCGGTGGCCCTGCCCCAATG;GGTGCACTACGTCCGCATGG;ATCCCCCCACACGAACTCTG;CGAGAACGTCTGCTACGACG	-0.49;0.62;1.03;1.96	37034;61662;68978;76200	5.66E-01;8.02E-01;5.10E-01;2.81E-02	1242;8464;15780;40408	1.21E+00;1.25E+00;1.57E+00;1.13E+00
PRSS8	0.780781	1.3663	4	GGAGCCGCACTTTGTCCAAG;CCAGCTAGACTCCTACTCCG;TATGAAGGCGTCCATGTGTG;CTTTCACCATTTGGTACCTG	-0.69;0.95;0.96;1.9	33672;67746;67835;76030	5.03E-01;1.14E+00;4.77E-01;3.19E-02	1412;9607;9696;43770	1.16E+00;1.15E+00;2.16E+00;9.91E-01
UBE4A	0.780327	1.41041	4	GAAGTAATAAGCGAGCGAAG;TTGGTCAACATAGATCTCTG;GATTGGCCCAAATCTTGGTG;GAGCTGTAGCCATCTGGCAA	0.42;0.74;0.77;1.2	57377;64018;64555;71058	1.29E+00;9.09E-01;4.14E-01;1.49E-01	6384;12887;13424;20065	5.94E-01;9.38E-01;1.76E+00;2.35E+00
CDX2	0.780262	1.35607	4	CTGCTGCAAACGCTCAACCC;CTACGGCGGTTACCACGTGG;TGGAATGGCTACGCGCCCGG;CAAATATCGAGTGGTGTACA	-1.07;0.08;1.35;2.77	28338;49559;72663;77253	4.28E-01;4.97E-01;6.91E-01;4.22E-03	189;4779;27883;49104	2.01E+00;1.70E+00;9.23E-01;7.91E-01
RAX	0.779139	1.37265	4	GTCCTTGGTAAACCCCAGGA;CGGCAAGGTCAACCTACCAG;GGTACGTGGTGAAAGTCGTG;GCACTCACCTTCGTACTCGG	0.11;0.84;0.9;1.26	50363;65939;66850;71821	9.54E-01;1.02E+00;4.54E-01;1.31E-01	5621;10592;11503;27079	6.35E-01;1.08E+00;1.95E+00;1.83E+00
ISPD	0.779018	1.30062	4	CCAAGTCATAGTCACTACAC;CTACAAACGAGATCTCTATG;TGTAGGGTGTAGCTGATGAG;CACAGCTGCTAAGGAACACG	-0.39;0.56;1.25;1.71	38855;60355;71658;75199	6.05E-01;7.51E-01;6.26E-01;5.10E-02	2243;5784;17087;38587	9.74E-01;1.54E+00;1.48E+00;1.21E+00
SLC25A23	0.778974	1.33437	4	GAACTTGATAGCTGACTCGG;GCAACTCGTGCACGTCCACG;CAACCGGCTGAACATCCTTG;GATAGCGGGAAAATTCCTCC	0.28;0.32;1.12;1.4	54130;55034;70162;73150	1.12E+00;5.96E-01;5.53E-01;9.90E-02	4292;7280;22408;23312	7.29E-01;1.36E+00;1.16E+00;2.09E+00
ZNF32	0.778244	1.31964	4	GGGAAAAGCTTCAGTCAACG;TACACATCAACGGATACACA;CCACAAATATGACCACTCTG;CTGACAAATAGCACACTCGT	0.05;0.63;1.01;1.42	48961;61807;68634;73346	9.00E-01;8.08E-01;4.99E-01;9.44E-02	4096;8808;15635;28481	7.45E-01;1.21E+00;1.58E+00;1.74E+00
ZNF32-AS3	0.778244	1.31964	4	GGGAAAAGCTTCAGTCAACG;TACACATCAACGGATACACA;CCACAAATATGACCACTCTG;CTGACAAATAGCACACTCGT	0.05;0.63;1.01;1.42	48961;61807;68634;73346	9.00E-01;8.08E-01;4.99E-01;9.44E-02	4096;8808;15635;28481	7.45E-01;1.21E+00;1.58E+00;1.74E+00
ZNF32-AS1	0.778244	1.31964	4	GGGAAAAGCTTCAGTCAACG;TACACATCAACGGATACACA;CCACAAATATGACCACTCTG;CTGACAAATAGCACACTCGT	0.05;0.63;1.01;1.42	48961;61807;68634;73346	9.00E-01;8.08E-01;4.99E-01;9.44E-02	4096;8808;15635;28481	7.45E-01;1.21E+00;1.58E+00;1.74E+00
SMG8	0.77797	1.52427	4	ATACGCCATGCAGTTACATG;AGGACCTGGAATCAGAACTG;ATATCAAAGGGATCATCTCG;GCTGGGTCTTGGTTCCGAGG	-1.29;1.05;1.43;1.92	25908;69250;73429;76084	4.04E-01;1.27E+00;7.53E-01;3.07E-02	1358;4013;8192;51534	1.18E+00;1.84E+00;2.37E+00;7.08E-01
MORN4	0.777143	1.50886	4	ATTCTCAAAATGACCCAGGT;TGACAACATGACCTTTGAGG;GACGCCATTAAACTTGCCCT;GGGAGGAATATCGTGGCGAG	-0.92;1.22;1.31;1.5	30214;71303;72268;73983	4.51E-01;1.50E+00;6.63E-01;7.94E-02	3459;5174;6139;47228	8.07E-01;1.63E+00;2.74E+00;8.59E-01
CEBPB	0.775299	1.41145	4	TGCTGCGTACGGCGGCAAGG;TCGAGCCCGCGGACTGCAAG;CCTCTTCTCCGACGACTACG;TGAAGTCGATGGCGCGCTCG	0.4;0.71;0.89;1.1	56970;63531;66748;69903	1.26E+00;8.85E-01;4.51E-01;1.78E-01	7539;10694;13911;20472	5.43E-01;1.07E+00;1.72E+00;2.31E+00
CEBPB-AS1	0.775299	1.41145	4	TGCTGCGTACGGCGGCAAGG;TCGAGCCCGCGGACTGCAAG;CCTCTTCTCCGACGACTACG;TGAAGTCGATGGCGCGCTCG	0.4;0.71;0.89;1.1	56970;63531;66748;69903	1.26E+00;8.85E-01;4.51E-01;1.78E-01	7539;10694;13911;20472	5.43E-01;1.07E+00;1.72E+00;2.31E+00
HAPLN1	0.775227	1.32852	4	GTCGTACAGCTGGTCGAAGG;TCCCTTACTTTCCACGACTG;TCTTTCAGACAACTATACTC;CCTTCAGAAACACTCTACCC	0.13;0.49;1.16;1.32	50744;58899;70594;72454	9.69E-01;7.01E-01;5.72E-01;1.16E-01	4988;6848;18543;26698	6.76E-01;1.41E+00;1.38E+00;1.85E+00
SOX6	0.774594	1.4644	5	TCACCACATAAGCCTGACGA;ATGACTCGGACTGAACAAGA;CCTGGAATAACATACAAACC;TGAATGGTACTGACAAGTGT;GCCGAGGCGGGCAGATCACG	0.06;0.07;0.36;1.63;1.75	49191;49331;56023;74837;75411	1.25E+00;7.12E-01;5.38E-01;8.34E-01;5.77E-02	2031;2606;21419;28111;28251	9.28E-01;1.99E+00;9.56E-01;1.26E+00;2.19E+00
PCDHB12	0.773988	1.3458	4	TGAGTGAGCTGTCTTCGCGG;GATCATTTATATCCCTGACC;CCTTGTCCAGAACTAACTCA;AAAAGCCTGCTCAAACTCAG	0.33;0.5;0.96;1.31	55250;59148;67842;72323	1.17E+00;7.09E-01;4.77E-01;1.19E-01	5119;9600;18294;22192	6.67E-01;1.15E+00;1.40E+00;2.17E+00
LOC101928362	0.773451	1.14746	5	AAAAGGAATAAGTAAAACAA;GGAATCTCACTCTGTCACCC;CAAGATGGCAGTATTGCGGG;GTTTGCAGATAATATCCTGA;GAGCCAGAATTAGTAATGGT	-2.5;-1.53;-0.03;0.64;7.29	15011;23634;46590;61972;77437	3.88E-01;5.05E-01;4.61E-01;3.88E-01;1.12E-04	5;15470;30852;53808;62442	3.49E+00;6.89E-01;6.40E-01;4.49E-01;4.67E-01
TDP1	0.773198	1.51079	5	AAGCCAATCCTGCTTGTGCA;ACTGGCACCAGAAAACTCAA;AAACTGACCTACGACAGGCC;GCCGAGGCGGGCAGATCACG;GCAGAAAAGCGGTTCCCAGG	-0.73;-0.35;1.03;1.75;2.17	32959;39646;68949;75411;76696	6.35E-01;5.16E-01;1.07E+00;9.29E-01;2.10E-02	746;2031;8493;37796;44483	1.33E+00;2.20E+00;1.98E+00;8.38E-01;1.20E+00
C4orf3	0.773095	1.29403	4	TAGGGTTGTTACGAAGCTGC;GAGACCATTACAGAATGTAG;AGAGTGCATTCCGGAACCCG;TCGCCGCACCGGAAACTGAG	0.12;0.56;0.76;1.65	50383;60472;64514;74936	9.55E-01;7.55E-01;4.13E-01;5.71E-02	2506;12928;16970;27059	9.31E-01;9.35E-01;1.48E+00;1.83E+00
RAB3B	0.770451	1.35805	4	GATGCCCACGGTGCTAACGA;GTAGTCAAAATTCTGGTCAG;CACAACAGCCTATTACCGTG;ATGCACAAGTTATTCTGGTG	-0.63;0.84;1.26;1.61	34585;65954;71744;74699	5.19E-01;1.02E+00;6.31E-01;6.26E-02	2743;5698;11488;42857	8.96E-01;1.55E+00;1.95E+00;1.03E+00
MOK	0.769833	1.44412	5	GATCTCGTAGAACACACAGC;TACGAGAGATCCAAGCACTG;CGGAATACATCTCCACCCGC;AATATTTATGAGCTAATACG;GCCGAGGCGGGCAGATCACG	0.09;0.1;0.43;1.48;1.75	49937;50090;57529;73801;75411	1.29E+00;7.34E-01;5.67E-01;7.13E-01;5.77E-02	2031;3641;19913;27352;27505	9.28E-01;1.72E+00;1.03E+00;1.30E+00;2.25E+00
PCGF5	0.769806	1.62542	6	CAAGGCAGGCAGATCACCTG;ACGAAATAATGGGCAATCAG;TCTAGACAGATAGCAATTTG;ACTTACGTTCTCGTAGTCCA;AAGATAGCAATGATTGCCCA;GCCGAGGCGGGCAGATCACG	-0.53;0.26;0.33;1.41;1.41;1.75	36237;53806;55404;73180;73182;75411	9.22E-01;1.20E+00;7.73E-01;1.44E+00;6.04E-01;6.92E-02	2031;4260;4262;22038;23636;41205	8.61E-01;1.44E+00;2.55E+00;1.30E+00;1.96E+00;1.64E+00
PNPLA1	0.76868	1.42454	4	ACAGCTGGGAATGATACAGG;CCACAGAGGTACATCGATGG;TTCAGAGTTCACGTCCAAGG;TGCACGATTACTACTACCGA	0.52;0.61;0.91;1.04	59520;61336;67146;69040	1.42E+00;7.88E-01;4.60E-01;1.99E-01	8402;10296;16106;17922	5.12E-01;1.10E+00;1.55E+00;2.54E+00
MAGEA12	0.768625	1.46249	5	TCTCTGGAGTCAATCCGATG;GCTTCCAAGTAGCACTCAGT;GGTGACTTCCACTAGAGTAG;AGCCAGGGAGCCATTCACAA;GACCAGCTGCAAGTACTCGG	0.0;0.4;0.86;1.04;1.55	47436;56902;66208;69085;74270	1.16E+00;9.97E-01;8.81E-01;4.66E-01;9.08E-02	3172;8357;11234;20540;29763	7.61E-01;1.08E+00;1.65E+00;1.74E+00;2.08E+00
CSAG4	0.768388	1.83919	7	TCTCTGGAGTCAATCCGATG;GCTTCCAAGTAGCACTCAGT;GGTGTTAAGAGAAAAGACCA;GGTGACTTCCACTAGAGTAG;CACCTTCAACTAATTGGATG;AGCCAGGGAGCCATTCACAA;GACCAGCTGCAAGTACTCGG	0.0;0.4;0.65;0.86;0.88;1.04;1.55	47436;56902;62347;66208;66582;69085;74270	1.84E+00;1.83E+00;1.58E+00;1.24E+00;7.12E-01;4.19E-01;1.27E-01	3172;8357;10860;11234;15095;20540;29763	6.51E-01;8.60E-01;1.28E+00;2.01E+00;2.42E+00;2.75E+00;2.91E+00
GDI1	0.768333	1.27849	4	ATATATGCTGAACAAACCTG;CTTCCCCTCACTCATCAGTG;GCCTCGGCCCATCGACTCAG;CAACGCCCTCAAAGGTCTTG	0.07;0.4;0.99;1.61	49377;57000;68306;74708	9.16E-01;6.45E-01;4.90E-01;6.24E-02	2734;9136;20442;28065	8.97E-01;1.19E+00;1.27E+00;1.76E+00
LOC105375545	0.768268	1.37359	5	GCTCCAAGTTCACGGCGGTG;TGCGGCCCAGCCTCATAACA;GCCATGTATAGTCCTTTGCG;AGATATTCTGATACCGGCAC;GAGAAAGAAATAAGCAACGG	-0.7;0.21;0.26;1.24;2.82	33503;52724;53659;71621;77278	6.49E-01;8.22E-01;5.03E-01;5.61E-01;4.58E-03	164;5821;23783;24718;43939	1.98E+00;1.35E+00;8.57E-01;1.45E+00;1.23E+00
ZNF197	0.768242	1.32414	4	AATGCCACTAGGTCAGTAGG;TCTTCAAAATCAAGGACCTG;GCATTTACGGAACCATTCAG;GGACTCTCTGATGTAAGAGG	0.08;0.61;1.08;1.3	49631;61475;69589;72210	9.25E-01;7.94E-01;5.31E-01;1.21E-01	5232;7853;15967;27811	6.59E-01;1.30E+00;1.56E+00;1.78E+00
ATP5LP5	0.768072	0.780135	1	AGCTCTAGGGATCTCAGCAG	0.77	64594	0.0788	12848	0.78
C7orf72	0.767677	1.36483	4	AAACAAGAAATGTAATGCAA;GAGTAAAACACTGTGAGATG;AAAATCCACTAGGGTTGGTA;AAGGTCACATCATCCCGAAG	-0.11;0.91;1.06;1.21	44869;67034;69339;71194	7.63E-01;1.09E+00;5.22E-01;1.46E-01	6248;8103;10408;32573	6.01E-01;1.28E+00;2.08E+00;1.50E+00
OR52K3P	0.765916	0.778617	1	CAATATCTATGGCATTGCTG	0.77	64549	0.0791	12893	0.779
DDIT3	0.765555	1.2607	4	CTGGTATGAGGACCTGCAAG;TCAGCCAAGCCAGAGAAGCA;ATTTCCAGGAGGTGAAACAT;GACTGGAATCTGGAGAGTGA	0.04;0.38;0.85;1.79	48685;56538;66108;75598	8.90E-01;6.33E-01;4.39E-01;4.18E-02	1844;11334;20904;28757	1.05E+00;1.03E+00;1.24E+00;1.72E+00
FOXK2	0.764356	1.39988	5	TCATCAGATACTCGAACTCG;AGCTGCGCGTAGGAGTAAGG;GGGGCGTGAAGATCTCGAGG;TCTGGAATGTTGATGGTCAG;TTTCATGGACAAGTACTACC	-0.54;0.53;0.6;0.77;2.46	36176;59813;61305;64586;77050	7.25E-01;1.15E+00;6.67E-01;3.96E-01;1.10E-02	392;12856;16137;17629;41266	1.61E+00;7.96E-01;1.25E+00;1.98E+00;1.37E+00
C10orf128	0.763378	1.27426	4	GTGGGTGTCGCCATATCTGC;GGCAACAGGCAAGACCCCTG;ACCCACAGCAGTCCCGATGA;TGAAGATCTGCATGATCAGG	-0.14;0.47;1.18;1.55	44198;58432;70823;74285	7.43E-01;6.87E-01;5.83E-01;7.23E-02	3157;6619;19010;33244	8.42E-01;1.44E+00;1.35E+00;1.47E+00
LOC100287402	0.762536	0.776265	1	AAACCCAGAACATAGCCACA	0.76	64479	0.0796	12963	0.776
P4HTM	0.761474	1.35168	4	GCGCGCGAGCAGATGCCGCG;CTCTTCGTGCACTACAGCAA;CCATATCGAACAACCTGCAG;TGTACTTGTGGAAGTCCCGA	0.02;0.77;1.1;1.16	48126;64553;69867;70670	8.70E-01;9.38E-01;5.42E-01;1.59E-01	6772;7575;12889;29316	5.75E-01;1.33E+00;1.81E+00;1.69E+00
ZNF646	0.760634	1.22731	4	CTTCTGCGATAGCCTCACTG;TCAGTAGTGAACTTCACAGG;GGCAAGACCTATCGCCATGG;GTCGTGCTTACCGCCACCGG	-0.26;0.03;0.83;2.44	41493;48407;65754;77040	6.69E-01;4.82E-01;4.32E-01;9.02E-03	402;11688;29035;35949	1.69E+00;1.01E+00;8.80E-01;1.33E+00
SLC1A6	0.759861	1.4573	4	TCACACAGGTATGCACCTGT;GCCACCAATGACCAGCCCAA;GGTGAGCTGATATGGGCGCA;GAGGGTGGTAACCAGGACCA	0.62;0.64;0.83;0.95	61558;62034;65710;67775	1.56E+00;8.17E-01;4.32E-01;2.32E-01	9667;11733;15408;15884	4.75E-01;1.00E+00;1.60E+00;2.75E+00
ABCD3	0.758874	1.64192	6	CAAGGCAGGCAGATCACCTG;ACTCGACTTCGAAGACCCAT;TGGCAAATATGAGCGCACAA;TGTGTACTCTTGAGATGTCG;AATTAAACTTACAAGAGGCA;GCCGAGGCGGGCAGATCACG	-0.53;0.66;0.75;0.86;1.07;1.75	36237;62397;64257;66263;69467;75411	9.22E-01;1.86E+00;1.25E+00;7.76E-01;4.45E-01;6.92E-02	2031;7975;11179;13185;15045;41205	8.61E-01;9.87E-01;1.42E+00;2.06E+00;2.87E+00;1.64E+00
OR2G2	0.75816	1.30234	4	AAGCTCAGCCTCGTTAAACG;ATGAAAACTATCGCCTATGG;AATGCATATCCATCTCTGCA;ACGAGAAACCAGAATGATGG	0.34;0.38;0.55;1.77	55572;56365;60150;75529	1.19E+00;6.28E-01;3.78E-01;4.34E-02	1913;17292;21077;21870	1.04E+00;7.44E-01;1.23E+00;2.20E+00
CDX4	0.757719	1.47871	4	GTAGTCGGTCGAGCAGAAAG;CCCATTGTACTAGACGGCCC;GCCAGCCTCCAATTTCGCTG;TCTTGCGCATCCATGCATAG	-0.95;1.16;1.34;1.49	29849;70573;72572;73848	4.46E-01;1.41E+00;6.84E-01;8.25E-02	3594;4870;6869;47593	7.93E-01;1.68E+00;2.59E+00;8.46E-01
FAIM	0.757259	1.27826	4	ACAAGATCGAATTTGAACAT;AAGTCTCAAGAAGTATATGG;ACTTGGGTATTACACATGGA;ATAAATATAGACGCTATCAG	-0.36;-0.01;1.4;2.0	39501;47147;73120;76328	6.20E-01;4.68E-01;7.26E-01;2.51E-02	1114;4322;30295;37941	1.26E+00;1.78E+00;8.36E-01;1.24E+00
SWSAP1	0.757212	1.26679	4	CGGCCTAGAAGAGTACCTAG;AGAGTCGTTCCGGTCCCGCG;CCGGGATTGTGGGCTCATGG;TGTCTAGAAGTAAGGCAATG	0.14;0.34;0.91;1.64	50878;55551;67083;74906	9.74E-01;6.08E-01;4.59E-01;5.78E-02	2536;10359;21891;26564	9.26E-01;1.09E+00;1.19E+00;1.86E+00
PIGP	0.757047	1.24503	4	ATTGTATGGATGGAGTCGAG;ATAGCAATAAGGAGGTAGAC;CAGGAATAAAGGCCCACACG;GTACTTACTGAAGCCAAATT	-0.02;0.33;0.99;1.73	46899;55363;68382;75294	8.28E-01;6.03E-01;4.92E-01;4.88E-02	2148;9060;22079;30543	9.92E-01;1.19E+00;1.18E+00;1.62E+00
GZMH	0.756429	1.2349	4	CTTTCAGAGGAGATCATCGG;ACTGAACAAAGGCCATGTAG;ACAATATCAAGGAACAGGAG;GCACAAAGTCCTTTCTCACT	-0.52;0.4;0.68;2.47	36521;56895;62849;77066	5.55E-01;6.42E-01;3.95E-01;8.43E-03	376;14593;20547;40921	1.72E+00;8.53E-01;1.26E+00;1.11E+00
GUCY2F	0.755589	1.2503	4	TGGAGCTCTCAACAGTTCAG;TGCAGTGTTGACCATTACAG;TGGAGCTGCTACGTTTCGGA;TTTATTGGACCTACCAACCC	-0.05;0.21;1.15;1.72	46141;52590;70458;75269	8.03E-01;5.45E-01;5.66E-01;4.94E-02	2173;6984;24852;31301	9.87E-01;1.39E+00;1.05E+00;1.57E+00
C22orf24	0.755104	1.28633	4	TTGGGAGGGGCTGTCGTGCA;GTTGTCATGACATTGTCTGC;TGGGAGGCTGCAATGATGAA;GATAAGAAATCCAAGGCTCG	-1.26;0.09;0.75;3.44	26206;49782;64314;77390	4.07E-01;5.00E-01;4.11E-01;1.14E-03	52;13128;27660;51236	2.57E+00;9.25E-01;9.31E-01;7.18E-01
TRIB3	0.753492	1.22491	4	GTCCAGAAACGAGCTCGAAG;TGGGCCAGATGATTCCCTGT;GGAGGACATAGGGCCCAAGA;CTGGTGACAGTGCGCCAGGG	-0.1;0.04;0.78;2.29	45028;48765;64754;76878	7.68E-01;4.86E-01;4.17E-01;1.27E-02	564;12688;28677;32415	1.55E+00;9.48E-01;8.93E-01;1.51E+00
EME2	0.752902	1.23514	4	CTCGCCAGCACGTTTCCCGG;CTGTGTCCACGCACACCGCG;GATCTCAGACTCCGACGCTG;CCGCGACCACTCACGCTGCG	-0.59;0.14;0.98;2.47	35337;51085;68173;77070	5.33E-01;5.19E-01;4.86E-01;8.34E-03	372;9269;26357;42105	1.72E+00;1.18E+00;9.83E-01;1.06E+00
NO_CURRENT_97	0.751932	1.34878	4	CGATGGATCCCTAGTTCCTG;CGCAAGGTGTCGGTAACCCT;CGAGTGTTATACGCACCGTT;CGATGCCCGTCTATGGCCCG	0.39;0.59;0.82;1.21	56639;60987;65450;71252	1.25E+00;7.75E-01;4.27E-01;1.45E-01	6190;11992;16455;20803	6.04E-01;9.88E-01;1.52E+00;2.28E+00
P2RY4	0.751911	1.30022	4	GGGCTGCATAATAGTAGATG;AAGACAACTGCATAGCTCAC;CCACTTCGGGCACTACGCTG;GTCAAACTCTTCAGGCCGAG	0.34;0.39;0.77;1.51	55671;56662;64570;74010	1.19E+00;6.36E-01;4.14E-01;7.87E-02	3432;12872;20780;21771	8.10E-01;9.38E-01;1.25E+00;2.20E+00
TPPP3	0.750766	1.3715	4	TGGCGACCAAGAGATTCAAG;GTCCGTGACAGGGACCGATG;ACTTACAGTGACGCCCACAT;AGAGATGAATGGCAAGAACT	-0.86;0.85;1.33;1.68	31009;66079;72497;75123	4.62E-01;1.03E+00;6.79E-01;5.28E-02	2319;4945;11363;46433	9.61E-01;1.67E+00;1.97E+00;8.89E-01
CEACAM1	0.750707	1.44427	5	ACCCCAGGGCCCGCAAACAG;CAGTGACTGAGTTATTGGCG;TGCCATTCAATGTTGCAGAG;GCCGAGGCGGGCAGATCACG;GAATGTTCCATTGATAAGCC	-0.02;0.04;0.17;1.75;1.82	46824;48736;51656;75411;75743	1.13E+00;6.95E-01;4.83E-01;9.29E-01;4.81E-02	1699;2031;25786;28706;30618	9.98E-01;2.20E+00;7.84E-01;1.23E+00;2.02E+00
FAM3D	0.750009	1.40404	5	GGTCCCTGGATCGTCGTAGG;AGTCCTGTGAAAAACAATGT;CATAGTAGGGCCCACGACGT;TCTTTGCCATAGTCACGACA;GCCGAGGCGGGCAGATCACG	-0.28;0.06;0.91;1.32;1.75	41174;49000;67087;72386;75411	8.93E-01;7.03E-01;9.35E-01;6.04E-01;5.77E-02	2031;5056;10355;28442;36268	9.28E-01;1.46E+00;1.75E+00;1.24E+00;1.65E+00
ROGDI	0.749727	1.28281	4	TGCCGGGCTCCGGCACTGAG;CCTCGTCGTGCAGCAGCCAG;TGGTAAGCAGGTAAATGGCT;CCAGTTCAAGACGGGCGCTG	-0.25;0.77;0.93;1.54	41856;64696;67424;74227	6.78E-01;9.45E-01;4.67E-01;7.36E-02	3215;10018;12746;35586	8.35E-01;1.12E+00;1.83E+00;1.35E+00
NSUN2	0.748985	1.32152	4	GAGCTCAAGATCGTGCCCGA;TGCTCGTCCATCAAGCCAAG;ATGTGTCTAATGAACTGCCA;CAGCTGCGGATTGCAACACG	0.16;0.67;0.96;1.21	51336;62599;67868;71220	9.93E-01;8.42E-01;4.78E-01;1.45E-01	6222;9574;14843;26106	6.02E-01;1.15E+00;1.64E+00;1.89E+00
MBIP	0.748642	1.27905	4	AATCAATGAAAACAACGTCA;AGATAGGAAGAACAGAAATG;CAGACCCAACCTCTCCCGAG;AGTGCACTAAAGAGCAATGC	-0.01;0.68;0.88;1.44	47218;62874;66527;73516	8.39E-01;8.54E-01;4.47E-01;9.04E-02	3926;10915;14568;30224	7.61E-01;1.06E+00;1.67E+00;1.63E+00
TTC39C	0.748039	1.55448	6	CAAGGCAGGCAGATCACCTG;GAAGCCGATCAACCATAGAG;GGGACGGATACAACGACTAG;CATCCAAGGCAAAAAACGGG;TCAGTGAAGAAAGCCCCTGT;GCCGAGGCGGGCAGATCACG	-0.53;0.26;0.41;1.06;1.54;1.75	36237;53851;57240;69343;74204;75411	9.22E-01;1.20E+00;8.44E-01;9.77E-01;6.93E-01;6.92E-02	2031;3238;8099;20202;23591;41205	8.61E-01;1.66E+00;1.78E+00;1.42E+00;1.96E+00;1.64E+00
MPG	0.747826	1.26632	4	GAACATGCCTCGGTTGCGGG;AGGGCCACCTTACCCGACTG;GCTGCGTCGGACGAGCTGTG;AGAACTCCGAGGCCGCATCG	0.14;0.28;0.38;2.19	50999;54124;56529;76734	9.79E-01;5.76E-01;3.77E-01;1.59E-02	708;20913;23318;26443	1.45E+00;6.32E-01;1.12E+00;1.87E+00
USP12	0.74593	1.50707	5	TTTAGACCTTTCTGTTGACG;CAGCACACCAGACCCAACGT;CTTGTGATGAACTTCTTAGG;TTGCGTATAAGAGTCAACCT;GCCGAGGCGGGCAGATCACG	-0.88;0.8;0.85;1.22;1.75	30761;65088;66053;71282;75411	5.81E-01;1.54E+00;8.72E-01;5.44E-01;5.77E-02	2031;6160;11390;12354;46681	9.28E-01;1.31E+00;1.64E+00;2.57E+00;1.10E+00
NO_CURRENT_217	0.745927	1.25878	4	TCGGCTACAATCTTTGGCAT;TCGGCATACGGGACACACGC;TCGGAAGCAAACTTCTGGAG;TCGGCTACGGCGTGGAGAAG	-0.35;0.44;1.25;1.65	39634;57900;71649;74929	6.23E-01;6.70E-01;6.25E-01;5.73E-02	2513;5793;19542;37808	9.30E-01;1.54E+00;1.32E+00;1.25E+00
BAIAP3	0.745664	1.27427	4	TGTTCAGCTCCGACTCGAAG;TCACCCGGACAGGTATGTTG;CGAGATTGAGGATGTGAGCA;GTACACGGTGCTTTACCGCG	0.19;0.52;0.64;1.64	52091;59516;61978;74890	1.03E+00;7.22E-01;3.88E-01;5.82E-02	2552;15464;17926;25351	9.24E-01;8.15E-01;1.42E+00;1.94E+00
FAM133A	0.744993	1.31382	4	GAGAGGCCCAACTCAATCTG;AAATCGACCAAGACCCACCT;TGAATCAGAATCAGAGAGCA;GAGGATGAGGAAAAGAAACA	-0.54;0.87;1.07;1.58	36109;66415;69494;74486	5.47E-01;1.05E+00;5.28E-01;6.76E-02	2956;7948;11027;41333	8.67E-01;1.29E+00;2.00E+00;1.09E+00
CEP290	0.744855	1.2568	4	ACAACAACAATCTAGGGACA;AAAGGATAAAGAATTAGTTG;ATATATAGGATTAACCACTG;AGCACTTTAAAGGATACCAA	-0.95;0.22;0.86;2.85	29847;52842;66172;77284	4.46E-01;5.50E-01;4.40E-01;3.53E-03	158;11270;24600;47595	2.09E+00;1.03E+00;1.06E+00;8.46E-01
TAS2R63P	0.743649	0.764728	1	TACCCAGAGTAAACCAACTC	0.74	64130	0.0819	13312	0.765
BAK1	0.74359	1.44997	4	ACGGCAGCTCGCCATCATCG;AAGACCCTTACCAGAAGCAG;GCTCACCTGCTAGGTTGCAG;GGTAGACGTGTAGGGCCAGA	-1.16;0.35;1.87;1.92	27278;55878;75941;76080	4.17E-01;6.16E-01;1.14E+00;3.08E-02	1362;1501;21564;50164	1.18E+00;2.66E+00;1.21E+00;7.54E-01
THAP4	0.742348	1.43682	5	GTCCTCGAGTGGAAACCCGA;AGGAGATGGACTGGCCACCA;GGGGGCGTGACAGATAAGAG;ACTCAAAACGTCTAATCCAA;GCCGAGGCGGGCAGATCACG	-0.58;0.21;1.15;1.19;1.75	35512;52507;70448;70972;75411	7.05E-01;8.14E-01;1.21E+00;5.31E-01;5.77E-02	2031;6470;6994;24935;41930	9.28E-01;1.27E+00;2.22E+00;1.44E+00;1.33E+00
ETV5	0.741463	1.4587	5	GTGTCGTCAAAGTATAATCG;ACCAGTATCCATCAGAACAG;GAATCGACGCAGTAATCCCG;TAGGTTCTGACATTTGCCGA;GCCGAGGCGGGCAGATCACG	0.33;0.38;0.59;0.66;1.75	55355;56460;60995;62485;75411	1.63E+00;9.76E-01;6.57E-01;3.88E-01;5.77E-02	2031;14957;16447;20982;22087	9.28E-01;7.08E-01;1.23E+00;1.71E+00;2.72E+00
SPCS1	0.741262	1.2768	4	GCTTCACCCCAGGATTACAA;ACCGAGACTTAAGGACCGTG;TGGATTTATCTACGGGTACG;CTAGCTGAACAGATGTTTCA	-0.01;0.61;1.03;1.34	47062;61517;68912;72568	8.33E-01;7.96E-01;5.08E-01;1.13E-01	4874;8530;15925;30380	6.84E-01;1.24E+00;1.56E+00;1.63E+00
NO_CURRENT_186	0.740995	1.18627	4	GTCCTCATCCGGTCAGGCTG;GTCTTCACAGGGTGCAACGA;GTCGCTGCGCCAGTGAGAAC;GTCGTCCGGGATTACAAAAT	-1.54;-0.52;-0.1;5.12	23534;36547;44955;77427	3.87E-01;4.29E-01;4.84E-01;3.14E-04	15;32487;40895;53908	3.11E+00;4.49E-01;5.56E-01;6.29E-01
TRMT11	0.740337	1.27913	4	GTTTAGATGCATCTGAAACC;TCATTCATTATGGCTAACCA;GGGTCATGGACAATCTCCTG;CTACCAAAATAAATATTATG	0.32;0.35;0.7;1.59	55133;55875;63297;74551	1.17E+00;6.16E-01;3.99E-01;6.61E-02	2891;14145;21567;22309	8.75E-01;8.74E-01;1.21E+00;2.16E+00
LOC105379403	0.740181	0.762645	1	AATTTGATGACAGTACCCCA	0.74	64066	0.0823	13376	0.763
LOC101927124	0.739849	0.76245	1	GTCTCTATATTGGATCTACC	0.74	64060	0.0824	13382	0.762
SUPT7L	0.73983	1.33953	4	GCCACAATCCTGGCCCACGC;CCACCAGACGGAACTCCCGT;AATCAACTGAATCGTATGGA;TCTTACAATCTAAAGGCAGG	0.12;0.75;1.0;1.09	50604;64152;68500;69760	9.63E-01;9.16E-01;4.95E-01;1.81E-01	7682;8942;13290;26838	5.38E-01;1.20E+00;1.78E+00;1.84E+00
FAM78B	0.739256	1.30553	4	CTTCTACCCCAGTGTGACAT;GATGGGGGGCATGACCACGC;CAGATGGGGTGAGCTACCCT;GAGACCAAAGTTTCACGACC	-0.04;0.78;0.98;1.24	46454;64809;68113;71583	8.13E-01;9.52E-01;4.84E-01;1.37E-01	5859;9329;12633;30988	6.22E-01;1.17E+00;1.84E+00;1.59E+00
LOC100133091	0.73835	1.62701	6	AGATACACTCCAGTTCACAG;CAAGGCAGGCAGATCACCTG;GAAGAAGAAGAAAAGGACAG;GTACAGTCTCCTTTGCACAT;GCCGAGGCGGGCAGATCACG;TGCTAATGACTCCAGAAACA	-0.59;-0.53;0.72;1.32;1.75;1.77	35221;36237;63607;72453;75411;75517	8.81E-01;5.80E-01;1.20E+00;1.32E+00;8.61E-01;6.56E-02	1925;2031;4989;13835;41205;42221	8.81E-01;2.03E+00;2.36E+00;1.99E+00;9.22E-01;1.58E+00
POMZP3	0.73835	1.62701	6	AGATACACTCCAGTTCACAG;CAAGGCAGGCAGATCACCTG;GAAGAAGAAGAAAAGGACAG;GTACAGTCTCCTTTGCACAT;GCCGAGGCGGGCAGATCACG;TGCTAATGACTCCAGAAACA	-0.59;-0.53;0.72;1.32;1.75;1.77	35221;36237;63607;72453;75411;75517	8.81E-01;5.80E-01;1.20E+00;1.32E+00;8.61E-01;6.56E-02	1925;2031;4989;13835;41205;42221	8.81E-01;2.03E+00;2.36E+00;1.99E+00;9.22E-01;1.58E+00
RSPH6A	0.738272	1.43892	5	GTTTCATGGCCAGGAAAATG;GCTCGTTGCACACAAAGTAC;GAGTACCCATCTGTGAACAC;TCTTGGTCAGCAGATTCACC;GCCGAGGCGGGCAGATCACG	0.11;0.55;0.61;0.68;1.75	50206;60248;61364;62857;75411	1.30E+00;1.18E+00;6.69E-01;3.89E-01;5.77E-02	2031;14585;16078;17194;27236	9.28E-01;7.22E-01;1.25E+00;2.02E+00;2.27E+00
HS6ST1P1	0.738069	0.978211	2	AGAAGAGCCAAGTCTCGCGG;CTCATCTTGTACCAGTACGC	0.57;0.91	60535;67072	4.67E-01;1.25E-01	10370;16907	6.35E-01;1.32E+00
RDH11	0.737457	1.35954	4	AGCTAATACAGGTATCGGGA;GATGGCTTTGAGATGCACAT;GGGGCGCAGCCATATACAGA;CTGCATTGTTGATCAAAACG	-0.34;1.03;1.03;1.23	39956;68897;68929;71488	6.31E-01;1.24E+00;5.09E-01;1.39E-01	5954;8513;8545;37486	6.16E-01;1.24E+00;2.32E+00;1.26E+00
MYOG	0.737448	1.3384	4	CCCTGCTCAACCCCAACCAG;GGAACCCCGCTTCTATGATG;TTACACACCTTACACGCCCA;TCCGTCCGCTCGTAGCCTGG	0.48;0.49;0.66;1.32	58635;58995;62499;72407	1.36E+00;7.04E-01;3.92E-01;1.17E-01	5035;14943;18447;18807	6.72E-01;8.37E-01;1.39E+00;2.46E+00
OR8U8	0.737299	1.11123	3	CAAGGATTCTGATATCATGA;TTTGATCCTACTCATTAGAG;TTACAACCATATACAATAGA	-0.53;0.74;2.0	36271;64089;76331	4.01E-01;4.51E-01;1.88E-02	1111;13353;41171	1.38E+00;1.13E+00;8.23E-01
ORC1	0.737217	1.24995	4	CTGTGACAGCAACATTAATG;ATCTGAGGAGCGGCACAACG;AACTCCTTGACCATACCGGA;ACACTTACCCCTATCAGTGG	0.2;0.32;0.66;1.77	52444;55182;62363;75515	1.04E+00;5.99E-01;3.91E-01;4.38E-02	1927;15079;22260;24998	1.03E+00;8.31E-01;1.17E+00;1.96E+00
LIPE	0.737126	1.46223	5	ACATGATGCTGAATCCCAGA;TTGGGACGTAGATTCAGTCG;AAAGTGATGTCAGGATACAG;GCTGGTTACCAATCGGCCGG;GCCGAGGCGGGCAGATCACG	-0.85;0.36;1.09;1.35;1.75	31161;55981;69712;72647;75411	5.91E-01;9.54E-01;1.14E+00;6.20E-01;5.77E-02	2031;4795;7730;21461;46281	9.28E-01;1.50E+00;2.09E+00;1.67E+00;1.12E+00
B3GNT4	0.736957	1.21604	4	CCTCCAGTGGGACTTCACTG;CCAGGAACTCTAACACGTTG;TGGTCACGTGGAGCGACGTG;GAAATTTCGGCAGTGACGAT	-0.16;0.36;0.94;1.81	43754;55998;67530;75719	7.30E-01;6.19E-01;4.69E-01;3.91E-02	1723;9912;21444;33688	1.08E+00;1.13E+00;1.21E+00;1.45E+00
TDRD12	0.736464	1.51013	6	CAAGGCAGGCAGATCACCTG;AGACGTAATTGATTTGACAA;TAAACGATTCTACTACAACT;ACACAATGTCAGTACTGTCT;GCCGAGGCGGGCAGATCACG;ATGCTATTTAGCAACTACCC	-0.53;0.0;0.32;0.95;1.75;1.93	36237;47555;55077;67772;75411;76132	9.22E-01;9.01E-01;7.61E-01;8.63E-01;8.61E-01;4.44E-02	1310;2031;9670;22365;30028;41205	1.03E+00;2.03E+00;1.58E+00;1.28E+00;1.49E+00;1.64E+00
OR5T1	0.735286	1.32356	4	GCTGGTTGTACCGATCATTG;ACATGCTACTATACATACAG;GAACAAGAAATAGCAAGCAG;GAAGCTTATTAATATAAACA	-0.7;0.85;1.2;1.59	33389;66010;71124;74598	4.98E-01;1.02E+00;5.97E-01;6.50E-02	2844;6318;11432;44053	8.82E-01;1.47E+00;1.96E+00;9.80E-01
HTR3D	0.734647	1.28798	4	AGCATGTGATGAAGTGCTAG;CAGAACAGTCATCTTGAATG;TCAAACACAATAAGCCAATG;CCAGAAAGTTTACCACGTAG	0.29;0.35;0.97;1.33	54451;55802;67968;72525	1.13E+00;6.14E-01;4.80E-01;1.14E-01	4917;9474;21640;22991	6.81E-01;1.16E+00;1.20E+00;2.11E+00
OR5B2	0.733802	1.27494	4	GGTTCCCACACAGAGTGAGG;CTCTGATAAACACACTAGTG;ACCACCATGACGGCCAGTGT;GACTGAATATGCCCCCAATG	-0.81;0.39;1.3;2.05	31755;56820;72177;76453	4.73E-01;6.40E-01;6.57E-01;2.23E-02	989;5265;20622;45687	1.31E+00;1.62E+00;1.26E+00;9.17E-01
HCFC2	0.73324	1.27678	4	GAATAGTCAAGTTTGCTGCA;TTCTAATCATAATAGTCATG;CATCTCCATTCACAATCATG;GGCAACTAGCTACGAATCAG	0.04;0.42;1.18;1.29	48599;57460;70916;72091	8.87E-01;6.58E-01;5.87E-01;1.24E-01	5351;6526;19982;28843	6.52E-01;1.45E+00;1.29E+00;1.72E+00
HAUS8	0.733226	1.27861	4	GCTGACGCTACTATCCGTAA;GCAATACAGGACATTCGCCA;GCTCCCGCTTCCTCTGAGAG;CTTAACAGCAGATAGCAGTG	-0.05;0.61;1.12;1.26	46102;61494;70088;71776	8.02E-01;7.95E-01;5.50E-01;1.32E-01	5666;7354;15949;31340	6.33E-01;1.35E+00;1.56E+00;1.57E+00
ZCCHC2	0.733206	1.2255	4	GCCACGGTAAGTCCGTCCTG;GGCTCTGGACATGACACATG;AGCAGGAGCGGGTATACGAG;TGCATGACACAGTGTAACGT	-0.43;0.37;1.13;1.87	38201;56158;70234;75925	5.91E-01;6.23E-01;5.56E-01;3.43E-02	1517;7208;21284;39241	1.13E+00;1.37E+00;1.22E+00;1.18E+00
ZNF202	0.73289	1.2741	4	CACCTGTGTAGGTAAAACTC;AGGGTTTGCAGAAACAACCC;CCCACCTTGTTAGACACCTG;GGCCAGAGTCTGTCTTACAG	0.24;0.52;0.57;1.6	53355;59574;60604;74621	1.08E+00;7.24E-01;3.80E-01;6.44E-02	2821;16838;17868;24087	8.85E-01;7.60E-01;1.42E+00;2.03E+00
VSTM5	0.732578	1.39244	4	GCAGAGGGCGAAGAGTCCTA;AGAGTCTGCACCTTTGACAA;AGATCGTGGAGTGGAAACCA;TGGACATATTCATCCAATTG	-0.94;0.93;1.37;1.56	29986;67470;72895;74381	4.48E-01;1.12E+00;7.08E-01;7.00E-02	3061;4547;9972;47456	8.54E-01;1.74E+00;2.13E+00;8.51E-01
LOC107984612	0.731529	0.757384	1	CATGAGCCATCCACCATCGC	0.73	63903	0.0834	13539	0.757
SDK2	0.730931	1.44366	5	CAAGGCAGGCAGATCACCTG;TTTCAAGACAGCATCCACGT;AGTTCAGCAAAGACACCGAG;AGTACCTGATGGTTACTCGG;CACCGTTGACAGGATGACAA	-0.53;0.66;0.75;1.28;1.49	36237;62456;64265;72054;73898	7.27E-01;1.33E+00;7.81E-01;5.84E-01;1.02E-01	3544;5388;13177;14986;41205	7.22E-01;1.41E+00;1.47E+00;2.25E+00;1.37E+00
GNB1	0.730718	2.02396	5	GAATCCAAATGCGCACGAGG;ACAATCTGAAAACTCGTGAG;ACCACGTTTACCGGACACAC;GCCGAGGCGGGCAGATCACG;GATAAGTTTACCATCCTGCG	-2.69;1.13;1.41;1.75;2.05	12976;70244;73209;75411;76454	3.95E-01;2.18E+00;1.60E+00;9.29E-01;2.79E-02	988;2031;4233;7198;64467	1.22E+00;2.20E+00;2.84E+00;3.47E+00;3.98E-01
KLF16	0.730668	1.81157	4	GGCCATCTCTTCGGGCGCCG;CGCAGTCCGGGAAGGGACAG;CGCGCGCACATCCAGGCCGG;CAGGTGCGACTTTAGGTGCG	-2.62;1.01;1.95;2.59	13720;68593;76160;77153	4.04E-01;1.21E+00;1.20E+00;6.47E-03	289;1281;8849;63715	1.83E+00;2.80E+00;2.28E+00;3.39E-01
NO_CURRENT_189	0.730542	1.28773	4	GTGTAAATCTGTCCAAGTAG;GTGTAGTCCTAGCCATGGGG;GTGTATGAATGTTAATTCCG;GTGGGGTAGTCTGTTGCTCG	0.24;0.58;0.77;1.34	53336;60722;64597;72555	1.08E+00;7.65E-01;4.14E-01;1.13E-01	4887;12845;16720;24106	6.83E-01;9.40E-01;1.50E+00;2.03E+00
UBP1	0.729088	1.26094	4	ACGCTTACTTATTTGAACCA;TTTACTCCACGGAAGCACGG;GGTGATTCTCTGGCAAAGCG;CTGTGGGAATAATTGACACA	0.08;0.43;1.06;1.35	49661;57508;69297;72695	9.27E-01;6.59E-01;5.21E-01;1.10E-01	4747;8145;19934;27781	6.93E-01;1.27E+00;1.30E+00;1.78E+00
TNMD	0.727868	1.27342	4	AAATGGCACTGATGAAACAT;GGACAATTAGAGTTAGGGCC;TGACTGTTCAAAGAAAGTTG;AGTGGGATTGATCCAATACA	-0.01;0.09;1.4;1.43	47100;49864;73113;73448	8.35E-01;5.01E-01;7.26E-01;9.20E-02	3994;4329;27578;30342	7.54E-01;1.78E+00;9.34E-01;1.63E+00
HIST2H3DP1	0.727593	1.65628	4	CCTTGCCGCCGGTCGACTTG;CTCGCGTACCAGCCGCTGGA;GGTAGCCAGCTGCTTCCTCG;GATCGCGCAGGACTTTAAGA	-2.44;0.91;1.51;2.93	15601;67097;74042;77312	3.87E-01;1.09E+00;8.14E-01;2.90E-03	130;3400;10345;61832	2.18E+00;1.98E+00;2.08E+00;3.91E-01
WNT7A	0.726679	1.32514	4	GGCTGCGACAAAGAGAAGCA;TGGCGAAGCCGATGCCGTAG;TGCGCCCAGAGCTACCACTG;TAGCCCAGCTCCCGAAACTG	-0.89;0.3;1.59;1.91	30686;54686;74541;76065	4.57E-01;5.88E-01;8.74E-01;3.11E-02	1377;2901;22756;46756	1.17E+00;2.11E+00;1.14E+00;8.77E-01
PIH1D3	0.726519	1.26534	4	ATTATATTCAGACAGCAGGT;GTAGATAAACCATTTGTCTG;CAGGATTAAGTAGCTTAGAG;TTCACTGCAACAACCTGTTG	0.05;0.48;1.08;1.3	48893;58677;69621;72168	8.98E-01;6.94E-01;5.32E-01;1.23E-01	5274;7821;18765;28549	6.57E-01;1.31E+00;1.37E+00;1.73E+00
ZNF691	0.726483	1.27968	4	CATTGCTCATCCAAGGCATG;ACGCACCAGCAAGATCACCT;CGGACAGTGACTTTCTGCCA;CCAACCTGAGAACACACCAG	0.09;0.15;1.32;1.35	49802;51261;72365;72673	9.32E-01;5.22E-01;6.70E-01;1.10E-01	4769;5077;26181;27640	6.91E-01;1.65E+00;9.90E-01;1.79E+00
LOC107984861	0.726266	0.753743	1	CGCTACCCCTAGGTGTACAT	0.73	63789	0.0842	13653	0.754
ZP4	0.726126	1.38147	4	CAGTGCGTGTAACCCTGTGA;GACCTTGCATTGTACCCGAG;GTTTGCTGTAAACCTCAACC;TCGGGATCCCATTTACGTGG	0.52;0.54;0.87;0.98	59526;60000;66388;68152	1.42E+00;7.38E-01;4.44E-01;2.22E-01	9290;11054;17442;17916	4.85E-01;1.05E+00;1.45E+00;2.54E+00
LOC100130331	0.726126	1.38147	4	CAGTGCGTGTAACCCTGTGA;GACCTTGCATTGTACCCGAG;GTTTGCTGTAAACCTCAACC;TCGGGATCCCATTTACGTGG	0.52;0.54;0.87;0.98	59526;60000;66388;68152	1.42E+00;7.38E-01;4.44E-01;2.22E-01	9290;11054;17442;17916	4.85E-01;1.05E+00;1.45E+00;2.54E+00
PIGV	0.725688	1.35129	4	GGAGTACACTAGTCCAGACT;GCTGCATAAAAGGACTGGTG;TCTACAGCTAACTGTACCAA;AACTGTTGAGACCCTTACGG	-0.61;0.98;1.19;1.35	34836;68222;70944;72668	5.23E-01;1.18E+00;5.88E-01;1.11E-01	4774;6498;9220;42606	6.91E-01;1.45E+00;2.23E+00;1.04E+00
STX10	0.725536	1.21835	4	ATTCCTCTCCAAAAATGCTA;GGCCACATCTCGCTACATCG;ACAAAGCCCCAGGATATCGA;ACTGGACGACCAATGAGCTG	-0.23;0.35;1.13;1.66	42211;55766;70225;74979	6.88E-01;6.13E-01;5.56E-01;5.61E-02	2463;7217;21676;35231	9.38E-01;1.37E+00;1.20E+00;1.37E+00
LOC105371586	0.725381	1.10754	3	CTTCTACCCCAGTGTGACAT;CAGATGGGGTGAGCTACCCT;GAGACCAAAGTTTCACGACC	-0.04;0.98;1.24	46454;68113;71583	5.40E-01;5.54E-01;1.02E-01	5859;9329;30988	7.12E-01;1.42E+00;1.19E+00
SLC22A25	0.725201	1.20446	4	AGCGCAGGGAGCAGTATACG;TGAAGACATCCTAACCATGG;GCATGAAACTTACCTCACAA;AGATGAATGAGCTTCCACTG	-0.35;0.17;1.08;2.0	39795;51563;69611;76324	6.27E-01;5.27E-01;5.32E-01;2.52E-02	1118;7831;25879;37647	1.26E+00;1.30E+00;1.00E+00;1.25E+00
LINC02301	0.725054	0.753012	1	AAGGCCAAATACCCAAGCCT	0.73	63766	0.0844	13676	0.753
ENSAP2	0.725054	0.753012	1	AAGGCCAAATACCCAAGCCT	0.73	63766	0.0844	13676	0.753
CD3G	0.724859	1.41228	5	AAAGAGAAAGCCAGATATGG;TACACTGATACATCCCTCGA;CAGAAGCCAAAAATATCACA;ACTTTGGCCCAGTCAATCAA;GCCGAGGCGGGCAGATCACG	-0.41;-0.25;0.95;1.59;1.75	38446;41803;67730;74548;75411	7.97E-01;5.47E-01;9.78E-01;7.95E-01;5.77E-02	2031;2894;9712;35639;38996	9.28E-01;1.90E+00;1.82E+00;9.17E-01;1.49E+00
LY6G5B	0.72476	1.38932	4	GAAGCGAACCTTGACATCTG;CCTGAAATGCATCCTACAGA;GATGTCGGGAACAGGAACTG;ATAATCGTACTGACAGCACT	-1.16;0.85;1.37;1.85	27293;66056;72822;75856	4.17E-01;1.03E+00;7.02E-01;3.59E-02	1586;4620;11386;50149	1.11E+00;1.72E+00;1.96E+00;7.55E-01
ZNF45	0.724481	1.23753	4	TCTCCCGTATGAACTATCAG;AATCTGCTGGACCATCAAAG;ACTGGTGAAAAACCCTACAA;AAGACTTGAAAACCGACGGA	0.0;0.48;0.97;1.45	47415;58627;68073;73567	8.45E-01;6.93E-01;4.83E-01;8.92E-02	3875;9369;18815;29888	7.66E-01;1.17E+00;1.36E+00;1.65E+00
VASN	0.72377	1.19629	4	ATCACCAATGAGACCTTCCG;ACGTGCCACCCGACACGGTG;ACCGTCCACCTGCCTCAATG;GCGCGAGAGCCACGTCACAC	-0.36;0.35;0.92;1.98	39536;55871;67306;76245	6.21E-01;6.16E-01;4.64E-01;2.70E-02	1197;10136;21571;37906	1.23E+00;1.11E+00;1.21E+00;1.24E+00
MORF4L2	0.722847	1.21563	4	GCAGAGAAGTAAAATGAGAG;CGCCTCCTCACTTTCAACAG;ACCATGGCTTGTTGAGGACT;ACCCCCCTTCAGGATCCGTG	-0.0;0.38;0.48;2.04	47257;56405;58690;76427	8.40E-01;6.29E-01;3.75E-01;2.29E-02	1015;18752;21037;30185	1.30E+00;6.95E-01;1.23E+00;1.64E+00
HMGN3	0.722652	1.21362	4	ATCCAAAGTAACTAAACAGG;ACGGTCTGCCAGATTGTCAG;CCTCTGCTAATCTTTGCTCC;CTAGTCTCCAGAGAATACAG	-0.07;0.41;0.95;1.6	45857;57103;67653;74648	7.94E-01;6.48E-01;4.72E-01;6.38E-02	2794;9789;20339;31585	8.89E-01;1.14E+00;1.27E+00;1.56E+00
PSMD13	0.722331	1.50792	6	CAAGGCAGGCAGATCACCTG;TCCTGCCTCAGCCTCCCGAG;GAACCGATGTCACACCAGGA;CATCTTTGTAGTAGGACGCG;AGCTCTAAAATTAAACATCG;ATGAAGAATGATTTCCACGA	-0.53;-0.4;0.89;0.92;1.06;2.39	36237;38719;66830;67251;69368;76988	9.22E-01;6.30E-01;1.48E+00;8.31E-01;4.43E-01;1.53E-02	454;8074;10191;10612;38723;41205	1.47E+00;9.79E-01;1.53E+00;2.40E+00;1.03E+00;1.64E+00
CD19	0.721846	1.28299	4	ATGAAAAGCCAGATGGCCAG;GGAAAGTATTATTGTCACCG;CTAGGTCCGAAACATTCCAC;AAGATGAAGAATGCCCACAA	0.01;0.65;1.04;1.19	47872;62292;69053;70963	8.61E-01;8.28E-01;5.13E-01;1.52E-01	6479;8389;15150;29570	5.89E-01;1.25E+00;1.62E+00;1.67E+00
ID2	0.721196	1.1932	4	AATAGTGGGATGCGAGTCCA;CAGCATCCCCCAGAACAAGA;TCAGTCCCGTGAGGTCCGTT;GCTCATCGGGTCGTCCACAG	-0.23;0.27;0.55;2.29	42280;53960;60210;76879	6.90E-01;5.72E-01;3.78E-01;1.27E-02	563;17232;23482;35163	1.55E+00;7.46E-01;1.11E+00;1.37E+00
APIP	0.720934	1.39809	4	AAAAGGAACGAATTCAGGTA;GGAGGAATTAGCTTGAAGCA;AAAATACCTATAATACCCTC;TCATGAAAAGAGGAGTACAC	-0.8;1.09;1.23;1.37	31847;69722;71492;72845	4.74E-01;1.32E+00;6.17E-01;1.06E-01	4597;5950;7720;45595	7.04E-01;1.52E+00;2.45E+00;9.20E-01
ABCF3	0.720584	1.28019	4	TGCGAGAGGATTTGCTACGG;GCAGAGTGTTGTACATGCGC;ACTTCCAGGACTGCTAAAGA;CAGCGGCTAGATGGTTACCG	-0.55;0.35;1.51;1.58	35928;55798;74022;74474	5.44E-01;6.14E-01;8.12E-01;6.79E-02	2968;3420;21644;41514	8.65E-01;1.97E+00;1.20E+00;1.08E+00
LOC100506851	0.719158	0.96809	2	ACTCCATGTCGTAAAACAGG;GCCGAGGCGGGCAGATCACG	-0.31;1.75	40564;75411	3.02E-01;2.31E-02	2031;36878	1.29E+00;6.44E-01
YWHAB	0.719104	1.32053	5	CAAGGCAGGCAGATCACCTG;CTCTGTTGCCTACAAGAATG;AGAGTACCGTGAGAAGATAG;TGAAGGCAGTCACAGAACAG;CTGCTGGGAGTTCGACACAG	-0.53;0.3;0.43;1.13;2.28	36237;54698;57536;70196;76860	7.27E-01;8.98E-01;5.67E-01;5.01E-01;1.64E-02	582;7246;19906;22744;41205	1.44E+00;1.19E+00;1.03E+00;1.58E+00;1.37E+00
LRPPRC	0.718688	1.53511	6	CAAGGCAGGCAGATCACCTG;CATATGCATTCAATAATGCG;TATTGGCGAGTAAAGCACAA;GAATCCGACATGGTTACTGG;GAAATTGAAACGCTACCCGT;GCCGAGGCGGGCAGATCACG	-0.53;0.47;0.68;0.71;1.24;1.75	36237;58546;62945;63426;71545;75411	9.22E-01;1.52E+00;1.15E+00;6.55E-01;5.12E-01;6.92E-02	2031;5897;14016;14497;18896;41205	8.61E-01;1.20E+00;1.19E+00;1.91E+00;2.41E+00;1.64E+00
CELA3A	0.718163	1.32632	4	GTTGGGAAGGATGTCACCAG;GGCAGTCACAACCCAATCGG;GAGGGATCTGACCTACCAGG;CATCCTCACCATGGACAACG	0.16;0.74;0.95;1.02	51316;64120;67683;68863	9.92E-01;9.15E-01;4.73E-01;2.04E-01	8579;9759;13322;26126	5.06E-01;1.14E+00;1.77E+00;1.89E+00
FTH1P19	0.717905	0.748809	1	ACAGGTACACATAGGATGCG	0.72	63633	0.0853	13809	0.749
ACAA2	0.717484	1.66516	5	GGAATCTCACTCTGTCACCC;TGTTACTGCAGGGAATGCAT;TTTCTGTAACTGTTCCAGGG;TAGCAGTGAAGTCTTTCAGA;TACCTGACATCCATTCACAA	-1.53;0.91;1.17;1.38;1.66	23634;67091;70778;72928;74978	4.49E-01;1.75E+00;1.25E+00;6.40E-01;7.02E-02	2464;4514;6664;10351;53808	8.55E-01;1.55E+00;2.27E+00;2.86E+00;7.91E-01
CCL3	0.717095	1.23969	4	ACTCACGTGATGCAGAGAAC;ATTCTGTGGAATCTGCCGGG;GGTGCAGAGGAGGACAGCAA;GAACTGGTTGCAGAGAGCCA	-0.16;0.69;0.87;1.46	43835;63149;66357;73675	7.33E-01;8.67E-01;4.43E-01;8.66E-02	3767;11085;14293;33607	7.76E-01;1.04E+00;1.69E+00;1.45E+00
AP3S2	0.716553	1.87705	6	CCACACAAAATACAAAGTAG;AACATCTGTAACTTCTTGGA;GGGCCGCACTCACGAAACGC;TTTCCATCTAGTCCTCAAGC;GCCGAGGCGGGCAGATCACG;GGTGCACTACATCCTCCAGG	-2.28;0.34;1.14;1.26;1.75;2.09	17178;55592;70404;71774;75411;76548	4.20E-01;1.31E+00;1.95E+00;1.23E+00;8.61E-01;3.02E-02	894;2031;5668;7038;21850;60264	1.18E+00;2.03E+00;2.20E+00;3.07E+00;2.11E+00;6.54E-01
FAM26D	0.716061	1.60575	6	GGGGTTACGGCATTGGAACG;ACTATGGCATCTTCCCACGC;TCTTTATGCGATGCATCATG;GCAGCACTTTGCCACACAGC;AGTCCTGACAAGAAGGAATG;CCAGTAGCAATGTTGCAGAG	-1.2;0.41;0.82;1.07;1.21;1.98	26890;57170;65572;69532;71177;76243	6.07E-01;1.42E+00;1.36E+00;9.93E-01;4.97E-01;4.06E-02	1199;6265;7910;11870;20272;50552	1.07E+00;1.15E+00;1.81E+00;2.23E+00;2.26E+00;1.11E+00
BARHL2	0.715965	1.22842	4	GTTCGGAGATTGATACCGTA;AGGCTGCAAACTTTGCGTCG;GTGGTGGGGAGAGGATACGC;TTCTATGGTAGGGACAAAGG	-0.07;0.59;0.88;1.46	45853;61099;66525;73640	7.94E-01;7.79E-01;4.47E-01;8.74E-02	3802;10917;16343;31589	7.72E-01;1.06E+00;1.53E+00;1.56E+00
CPT1B	0.714848	1.826	4	GGCGATACATGATCATGGCG;TATTCCTCATCATCCAACAA;GCATCTCAAACATCCACCCA;GCAAGGCTATTACCTCCCAG	-2.56;1.34;1.65;2.42	14423;72603;74944;77025	3.96E-01;1.69E+00;9.32E-01;9.36E-03	417;2498;4839;63014	1.67E+00;2.23E+00;3.04E+00;3.58E-01
MAGEB2	0.713563	1.20468	4	AAGGCCCGAGATGAGACCCG;CAAGCGAAGATCCTCTAACC;CAAGGCCAAAGACAACACTG;GCAGGGATTCCTCATCAGTG	-0.76;-0.06;0.63;3.05	32535;45989;61781;77337	4.85E-01;4.57E-01;3.86E-01;2.33E-03	105;15661;31453;44907	2.27E+00;8.06E-01;7.98E-01;9.47E-01
MSMP	0.712966	1.27379	4	GCGGAGCCAAGACTCACCCA;TTTCCCCTCATAGTGACAGG;CAGGCCAAGGGGATCCTAGG;CACGCCAACAGGATGCAGAC	0.37;0.37;0.45;1.66	56253;56329;58008;74998	1.23E+00;6.27E-01;3.75E-01;5.57E-02	2444;19434;21113;21190	9.41E-01;6.74E-01;1.23E+00;2.25E+00
ZNF184	0.712785	1.21301	4	CCGAAAAGACAATACCCAGT;AAGGGATGAGCAGTAACTGA;ATGGAGCCAAGCATTCCAGT;AATGTGATAAAACCTTCACC	-0.19;0.4;1.12;1.52	43120;56921;70120;74093	7.12E-01;6.43E-01;5.52E-01;7.68E-02	3349;7322;20521;34322	8.20E-01;1.36E+00;1.26E+00;1.41E+00
RBMY2KP	0.712676	1.13227	3	AATGCTGCCAAAGATATGAA;TCTGCAAGAGGAAGCAGTGG;TGCCAAAGATATGAATGGAA	-0.46;-0.02;2.62	37624;46867;77171	4.14E-01;3.63E-01;4.55E-03	271;30575;39818	1.98E+00;5.48E-01;8.67E-01
NUPR2	0.711137	1.56815	4	CTGCGCGACTTCCCGGCCTG;GGAGGAGCTTTACGACTGCC;ACGTGGAAGCGCCCGCTCTG;GCCACCCATAAGCTACGAGG	-1.83;0.65;1.9;2.12	21081;62208;76051;76608	3.77E-01;8.24E-01;1.17E+00;1.88E-02	834;1391;15234;56360	1.38E+00;2.73E+00;1.61E+00;5.52E-01
TMSB4XP6	0.710795	0.744615	1	TTTCTCGATCTCAGCCATAT	0.71	63499	0.0862	13943	0.745
MLLT10	0.710519	1.47439	6	CAAGGCAGGCAGATCACCTG;GCCCGCTTATATCCTGCTGT;GCCGATAATGTCCAATACTG;ACCTTATTATAACGATCATG;GCCGAGGCGGGCAGATCACG;TTCAAGTACCCACTGGACCG	-0.53;-0.11;0.49;0.78;1.75;1.89	36237;44802;58955;64811;75411;75993	9.22E-01;8.00E-01;9.21E-01;7.08E-01;8.61E-01;4.92E-02	1449;2031;12631;18487;32639;41205	9.91E-01;2.03E+00;1.29E+00;1.55E+00;1.34E+00;1.64E+00
CTBS	0.709657	1.23875	4	CATACCTTTAAGTACTACTC;GTGATCCCTCAATTTCACGA;ATGATGAACAAAGTCAGATC;TTGGTCACAGATTACAACTG	0.19;0.36;0.91;1.39	51997;55999;67031;73039	1.02E+00;6.19E-01;4.58E-01;1.02E-01	4403;10411;21443;25445	7.19E-01;1.09E+00;1.21E+00;1.93E+00
LIPA	0.708785	1.21772	4	GCTGGCAGATTCTAGTAACT;CAAGAACAAGTGTATTATGT;TTAACCGAATTCCTCATGGG;GTATGACATGAGTGCAAACG	0.13;0.39;0.62;1.69	50835;56625;61761;75138	9.73E-01;6.35E-01;3.86E-01;5.24E-02	2304;15681;20817;26607	9.64E-01;8.06E-01;1.25E+00;1.86E+00
KRTAP20-2	0.707564	1.24655	4	AGCCCAGGCCTCCATAGCCA;TACTACAGCAACTACTATGG;TATGGCTATGGAGTCCTGGG;ATCCATAGCCACCATAGCCA	-0.14;0.58;1.14;1.25	44111;60850;70354;71724	7.41E-01;7.69E-01;5.61E-01;1.33E-01	5718;7088;16592;33331	6.30E-01;1.38E+00;1.51E+00;1.46E+00
CDR2	0.707347	1.23723	4	ACAATTAGACGTCACAGCAA;GAGCCCGGGAAAGTGTGACC;GCAGAAGCGGGTGACTATGG;ACTGGATCGGAACACAGAGT	-1.02;-0.03;0.99;2.88	28997;46627;68375;77295	4.36E-01;4.63E-01;4.92E-01;3.28E-03	147;9067;30815;48445	2.12E+00;1.19E+00;8.19E-01;8.15E-01
PPP6C	0.707283	1.48089	5	GAGAATCGCTTGAATCCGGG;TATCAGGAGATAAACCACCA;TGAGAGTAGACAGATAACAC;CCTGCCAGAGAACGACCTGA;CAGTTCTGAACAGTTCACAA	-1.64;0.56;0.61;1.42;2.59	22685;60439;61365;73326;77155	4.36E-01;1.19E+00;6.69E-01;6.70E-01;8.03E-03	287;4116;16077;17003;54757	1.74E+00;1.62E+00;1.25E+00;2.04E+00;7.53E-01
RTL5	0.706579	1.30353	4	GAGATCGAAGTCATTCCCGG;GACCTTCATAGCCGACCATG;GCCCCGCAAGGAATTAACCT;TGAGCTGATTCTCGAATGTG	0.1;0.75;0.92;1.06	49997;64235;67262;69320	9.40E-01;9.21E-01;4.63E-01;1.92E-01	8122;10180;13207;27445	5.22E-01;1.11E+00;1.78E+00;1.80E+00
S1PR2	0.705798	1.19471	4	GCAGTAGATGCGCACGTACA;CCACCACAATGGCGCAACAG;GGAACACTATAATTATACCA;CACGCCTGCCAGTAGATCGG	-0.65;0.38;0.6;2.49	34290;56416;61218;77089	5.14E-01;6.29E-01;3.83E-01;7.91E-03	353;16224;21026;43152	1.75E+00;7.84E-01;1.23E+00;1.02E+00
LOC101929947	0.70577	1.33456	4	GGAGCTCCGTATGATGACTT;CGGATCGAGTTTGATAACGA;TTTCCAGTTATAAGTACCCG;AGATGGCGATGACGCCCATG	0.22;0.77;0.86;0.97	52936;64607;66303;67951	1.06E+00;9.40E-01;4.42E-01;2.27E-01	9491;11139;12835;24506	4.80E-01;1.04E+00;1.82E+00;2.00E+00
ENSA	0.704998	1.25912	4	CCCTGCGGAGGAGACCGGCG;AAGGCCAAATACCCAAGCCT;CATGAAGAGACTCCAGAAAG;TCTGCCTGAGAGAGCTGAAG	-0.07;0.73;0.95;1.22	45757;63766;67677;71276	7.91E-01;8.97E-01;4.73E-01;1.44E-01	6166;9765;13676;31685	6.05E-01;1.14E+00;1.74E+00;1.55E+00
PRM3	0.704971	1.24736	4	AGGATTCGTGGCCCCGGCCA;CGCTGTGCCAAGCTCAACAC;CTCCTTGTCATCAGCGGGCG;GAAGTTATCCTGACTCACAC	0.21;0.43;0.88;1.3	52528;57584;66548;72256	1.04E+00;6.61E-01;4.47E-01;1.20E-01	5186;10894;19858;24914	6.62E-01;1.06E+00;1.30E+00;1.97E+00
CEBPG	0.704735	1.27748	4	AATTAGTGTTATCCATACCC;GCAGCAAAACAGCACTCCAG;GAGCAAAAAGAGTTCGCCCA;AGTATCGGCAACGCCGAGAG	0.39;0.39;0.75;1.29	56609;56787;64296;72073	1.24E+00;6.39E-01;4.10E-01;1.25E-01	5369;13146;20655;20833	6.51E-01;9.24E-01;1.25E+00;2.28E+00
INTS6	0.704302	1.34669	4	ACTACAGGATGAGATGTACG;AAAGTCCGGAGCCGATCACA;CTTACCCCAAGATAGTAGGG;GTTACCTTGATAGCATAGGG	-0.9;-0.26;1.7;2.28	30455;41579;75176;76861	4.54E-01;4.31E-01;9.71E-01;1.31E-02	581;2266;35863;46987	1.53E+00;2.32E+00;6.71E-01;8.68E-01
MORN5	0.703207	1.20862	4	ATTACTGCGACGGCTATGAT;GATGGCATGTTTCACGGCGA;CAACATATATTGTTTCGGTA;CACAGGGAGCAAATATATCG	0.14;0.33;0.66;1.69	50885;55282;62544;75125	9.75E-01;6.01E-01;3.92E-01;5.27E-02	2317;14898;22160;26557	9.62E-01;8.39E-01;1.17E+00;1.86E+00
TCP11X2	0.702501	1.23547	4	AAACACACATCCCTACCTCT;TCATTAGGCCCAGAACACGG;ACATAGTGTAGTGATGTCTG;ATGGCGTGTTCACTTCCAAG	0.23;0.34;0.41;1.83	53037;55490;57235;75799	1.07E+00;6.06E-01;3.75E-01;3.72E-02	1643;20207;21952;24405	1.10E+00;6.51E-01;1.19E+00;2.01E+00
TXK	0.70239	1.26764	4	ACCGTAGCTAAACCCAGCTG;GGAAGGCAAGAGACCGTTTG;TGGTCCATTTAGGTGAATGG;AGAACATCTATTGAGACAAG	0.39;0.39;0.51;1.52	56619;56690;59347;74130	1.25E+00;6.37E-01;3.76E-01;7.59E-02	3312;18095;20752;20823	8.24E-01;7.16E-01;1.25E+00;2.28E+00
AICDA	0.701573	1.19935	4	TCTCCAGAACGGCTGCCACG;TGTCGGGCACAGTCGTAGCA;ACCGCAAGGCTGAGCCCGAG;CTCACAGAAGTAGAGGCGCG	0.0;0.45;0.7;1.66	47427;57992;63233;75002	8.46E-01;6.73E-01;3.98E-01;5.56E-02	2440;14209;19450;29755	9.41E-01;8.71E-01;1.32E+00;1.66E+00
RNASE10	0.700613	1.19487	4	TGACTCACAGGACAAAGCTG;ACCTCATCTTCACCGAGGAT;CTGGACCAAAATTCATTGAG;TGGGCTATGCAACTCTGACT	-0.53;0.54;0.61;2.18	36348;60006;61528;76704	5.52E-01;7.38E-01;3.85E-01;1.66E-02	738;15914;17436;41094	1.43E+00;7.96E-01;1.45E+00;1.10E+00
AR	0.698401	1.31222	4	GGACGCAACCTCTCTCGGGG;CCTTAAAGACATCCTGAGCG;AGGGTACCACACATCAGGTG;TCCAGCTTGATGCGAGCGTG	0.29;0.71;0.73;1.07	54486;63424;63800;69462	1.13E+00;8.80E-01;4.05E-01;1.89E-01	7980;13642;14018;22956	5.27E-01;8.98E-01;1.71E+00;2.11E+00
LOC100128775	0.698026	0.736927	1	ATGAGCCTCTGCTGTTGTGG	0.7	63250	0.0879	14192	0.737
MYT1L	0.697827	1.819	6	TCCGAGACAACTTCCCGGGG;CAAGGCAGGCAGATCACCTG;CGACTACACGCACGACATGG;GCCGAGGCGGGCAGATCACG;ATATGAATTACGTCATGTTG;TTGTTTCTGTAGCCATACTG	-1.91;-0.53;0.85;1.75;1.76;2.27	20354;36237;66086;75411;75483;76857	4.64E-01;5.80E-01;1.41E+00;2.03E+00;8.75E-01;1.97E-02	585;1959;2031;11356;41205;57081	1.36E+00;2.06E+00;3.48E+00;2.30E+00;9.22E-01;7.95E-01
SKAP1	0.695743	1.57214	6	AAAAGGGTGCATCGGATGTG;CAAGGCAGGCAGATCACCTG;ATAGTTTCTTTGGATCGGAG;GTACACCGTAGCCCTTAATG;GCCGAGGCGGGCAGATCACG;GATCCCTTGCAACAGCGCTG	-0.93;-0.53;0.34;1.47;1.75;2.08	30046;36237;55614;73696;75411;76532	6.99E-01;5.80E-01;7.80E-01;1.54E+00;8.61E-01;3.08E-02	910;2031;3746;21828;41205;47396	1.18E+00;2.03E+00;2.71E+00;1.31E+00;9.22E-01;1.28E+00
ASB14	0.694839	1.18444	4	ATCTGCGTTGTGCCAACGAG;AACATGCACCTAAGGATGAG;AAATCATGGAAATGTTACTG;AATACAAAGCTGACTTCCTG	0.01;0.32;0.66;1.79	48051;55178;62377;75603	8.68E-01;5.99E-01;3.91E-01;4.17E-02	1839;15065;22264;29391	1.05E+00;8.32E-01;1.17E+00;1.68E+00
FAM57B	0.694491	1.45964	5	GGCTGAGACAATGACTGCGT;ATCAATGATGTGCTTGCAGG;GGGCACAGCAAATTGCGTGT;GCCGAGGCGGGCAGATCACG;ATCTTGCCAAGGCAGACGAA	-1.24;0.48;0.61;1.75;1.88	26425;58630;61533;75411;75960	4.93E-01;1.09E+00;6.74E-01;9.29E-01;4.19E-02	1482;2031;15909;18812;51017	1.05E+00;2.20E+00;1.26E+00;1.88E+00;9.06E-01
TNNI1	0.693583	1.22761	4	ACCTGCCAGGCTAACCTGCA;CTTCAGCAAGAGTTTGCGGG;TGAGGAGCGATACGACATTG;GAGACACGGACTCGACGCAG	0.18;0.51;0.52;1.57	51824;59265;59638;74436	1.01E+00;7.13E-01;3.77E-01;6.88E-02	3006;17804;18177;25618	8.60E-01;7.26E-01;1.40E+00;1.92E+00
CCL3P1	0.692879	0.733848	1	ATTCTGTGGAATCTGCCGGG	0.69	63149	0.0886	14293	0.734
LOC102724850	0.692879	0.733848	1	ATTCTGTGGAATCTGCCGGG	0.69	63149	0.0886	14293	0.734
CCL17	0.692729	1.2547	5	GAGAATCGCTTGAATCCGGG;TGGCTCCCTTGAAGTACTCC;TGCAGCTCGAGGGACCAATG;GACATCTGAGGACTGCTCCA;TCTCTGCAGCACATCCACGC	-1.64;-0.02;0.12;0.81;4.2	22685;46891;50508;65241;77418	4.36E-01;6.48E-01;4.74E-01;4.01E-01;6.45E-04	24;12201;26934;30551;54757	2.81E+00;8.29E-01;7.47E-01;1.13E+00;7.53E-01
PRR14	0.691637	1.28521	4	GCTCGCGACACAAACACAGA;GCGGACGGAACGGAAGAGCG;CCCGGCCCCCAATCCGCCAG;CAGTCCTAGACCCCCCGCTG	0.39;0.5;0.7;1.17	56713;59182;63301;70770	1.25E+00;7.10E-01;3.99E-01;1.56E-01	6672;14141;18260;20729	5.80E-01;8.74E-01;1.40E+00;2.29E+00
ARR3	0.691414	1.18453	4	TTAAGTACTCAGGATCAACC;GCGACTACTGCACAAGCTAG;CTCTGCTCAGAGACTATGTG;ACTTCAAAGTCAATCCCACA	-0.18;0.53;0.84;1.58	43246;59798;65876;74485	7.16E-01;7.31E-01;4.34E-01;6.76E-02	2957;11566;17644;34196	8.67E-01;1.01E+00;1.44E+00;1.42E+00
PBDC1	0.6905	1.26921	4	GAAATTGCTCGGAACCGGGA;TGGCAAAGAATTGTATCCTG;CTGCGACTAGATTGTTCTCA;GTCCAACACATCTATCCTAA	0.02;0.71;0.95;1.09	48115;63435;67735;69705	8.70E-01;8.80E-01;4.74E-01;1.83E-01	7737;9707;14007;29327	5.35E-01;1.14E+00;1.71E+00;1.69E+00
S100P	0.689956	1.37589	4	TGCCGTGGATAAATTGCTCA;CCTCTAGAGTGGAAAAGACA;ACGGAACTAGAGACAGCCAT;TTCCCGATATTCGGGCAGCG	-0.97;0.99;1.35;1.38	29619;68407;72702;72946	4.43E-01;1.20E+00;6.93E-01;1.04E-01	4496;4740;9035;47823	7.12E-01;1.70E+00;2.25E+00;8.37E-01
GDF9	0.689485	1.22677	4	TGACTTGAGTAAGTGTTCAA;ATTCAAATATAAGATCAGTG;AGAGCCGAACAGTGTTGTAG;AAAGTTCTATCTGTTGGGCG	-0.09;0.67;0.9;1.27	45231;62734;66976;71950	7.74E-01;8.48E-01;4.56E-01;1.28E-01	5492;10465;14708;32211	6.43E-01;1.09E+00;1.65E+00;1.52E+00
TLR6	0.689443	1.26986	4	AATGTTCATCTCAGAAAACA;TATTAACTGATATGTTCACT;TGTCTCCAATTTAACTAACG;ATTTCCAAGTCGTTTCTATG	-0.69;0.15;1.6;1.69	33589;51283;74630;75154	5.02E-01;5.23E-01;8.86E-01;5.21E-02	2288;2812;26159;43853	9.67E-01;2.13E+00;9.91E-01;9.88E-01
KRT39	0.689251	1.21162	4	GGTAATCAGGACATAGAACA;ATGTCAATATGAGCCCATCA;ATGGGCTTGCGACAAAAGCG;CTGGACTTGTGCCTCTAGGT	-0.48;0.57;1.16;1.52	37076;60562;70568;74087	5.67E-01;7.59E-01;5.71E-01;7.69E-02	3355;6874;16880;40366	8.19E-01;1.41E+00;1.49E+00;1.13E+00
SERPINA5	0.688666	1.2174	4	TAAGAACCTCGATAGCAATG;CAACTTTAGGGACTCTGCAG;GGTAGTGATACTGATCCTCG;CCTCCATGTAGGTGCCACGG	-0.23;0.57;1.12;1.3	42140;60552;70108;72228	6.86E-01;7.58E-01;5.51E-01;1.21E-01	5214;7334;16891;35302	6.61E-01;1.36E+00;1.49E+00;1.36E+00
SUPT20H	0.688408	1.21386	4	GATCAAAGACCGATGCTGAG;GGATATTCTCTGATGCTCAG;TACCGAAGACTGAACTGACA;TGATAACCACAAATGGACCC	0.08;0.23;0.25;2.2	49484;53091;53404;76745	9.20E-01;5.55E-01;3.90E-01;1.57E-02	697;24038;24351;27958	1.46E+00;5.61E-01;1.07E+00;1.77E+00
TMEM9	0.68759	1.17516	4	GAGCAACAGGGCACCCACCA;CCCTGGCGTTACCTTGATGG;CATCCGGCTTTCGGATCAGA;CCACCTTATAGAAACATCAG	-0.26;-0.07;1.12;1.96	41620;45613;70164;76199	6.72E-01;4.54E-01;5.54E-01;2.81E-02	1243;7278;31829;35822	1.21E+00;1.36E+00;7.86E-01;1.34E+00
PRSS2	0.686718	1.29721	4	TCTGGCTACCACTTCTGCGG;CGTTGGGGGCTACATCTGTG;GAATGAACAGTTCATCAATG;GGACACGCGGGAATTGATGA	-0.88;0.14;1.64;1.84	30719;51074;74901;75841	4.58E-01;5.19E-01;9.26E-01;3.63E-02	1601;2541;26368;46723	1.11E+00;2.22E+00;9.82E-01;8.78E-01
CCDC50	0.685184	1.25173	4	ATTTGGCATCGAACGTTCAG;CAGACCAACCAGGGTCAAGG;CAAGGAAGTTGTATATGGGA;AACACTTCACCACTGATCGT	0.36;0.4;0.65;1.33	56122;56934;62160;72530	1.22E+00;6.43E-01;3.89E-01;1.14E-01	4912;15282;20508;21320	6.81E-01;8.22E-01;1.26E+00;2.24E+00
VSX2	0.684839	1.76781	5	GGCGGAGTATGGGCTCTACG;AGCCATTGGGCAGAGCATCG;GTGGCCAAGAGTACCTCGGG;GCCGAGGCGGGCAGATCACG;CTTTACCTCCTACCAGCTAG	-2.08;-0.14;1.72;1.75;2.17	19024;44144;75270;75411;76701	4.00E-01;5.88E-01;2.14E+00;9.29E-01;2.09E-02	741;2031;2172;33298;58424	1.34E+00;2.20E+00;3.68E+00;1.01E+00;6.12E-01
MGAT4C	0.684733	1.45437	6	TCCTGCCTCAGCCTCCCGAG;ATCCCTAGAAGGAACTTACT;TGTGGCAGCTAGGTAGCGAT;TGAGTCAATAGCCAATCACA;AGGAGACAAACAACTTATAA;GCCGAGGCGGGCAGATCACG	-0.4;-0.01;0.66;1.01;1.1;1.75	38719;47101;62467;68690;69910;75411	1.03E+00;8.84E-01;1.12E+00;9.26E-01;4.56E-01;6.92E-02	2031;7532;8752;14975;30341;38723	8.61E-01;1.03E+00;1.70E+00;1.87E+00;1.47E+00;1.81E+00
SLC25A4	0.684311	1.87992	4	TGGTAACCTGGCGTCCGGTG;GGGGAAGTAACGGATCACGT;CCAGACCATGGAACTCACGC;CAAAGGGATCATTGATTGTG	-2.77;1.16;2.09;2.25	12050;70637;76550;76829	4.26E-01;1.41E+00;1.35E+00;1.38E-02	613;892;6805;65390	1.51E+00;3.11E+00;2.61E+00;2.94E-01
PRPS2	0.684257	1.91985	4	TGCAGGCATTGATCATGATG;ACTTGTGGCCAATATGCTGT;CATTGTTTCACCTGACGCAG;GAGATTGGTGAAAGCGTGAG	-3.21;0.03;2.63;3.29	6970;48476;77179;77376	5.67E-01;4.83E-01;1.87E+00;1.46E-03	66;263;28966;70472	2.47E+00;4.16E+00;8.83E-01;1.64E-01
T	0.683483	1.25656	4	ACAGAGCGCGAACTGCGCGT;CTCACCAACAAGCTCAACGG;CCGCTGGAAGTACGTGAACG;TGGCTGGTGATCATGCGCTG	0.26;0.58;0.67;1.22	53848;60863;62664;71298	1.10E+00;7.70E-01;3.93E-01;1.44E-01	6144;14778;16579;23594	6.06E-01;8.44E-01;1.51E+00;2.06E+00
HNRNPUL1	0.683322	1.30418	4	CCAGCCGATACGGACCACGT;GCGACCCGGGCACATCAACG;CCCCGGATACGCTCACTAAG;GGGGTACTTTGAGCACCGAG	0.36;0.61;0.76;1.0	56018;61537;64386;68511	1.21E+00;7.96E-01;4.12E-01;2.13E-01	8931;13056;15905;21424	4.96E-01;9.29E-01;1.56E+00;2.23E+00
DKK4	0.682987	1.40766	4	GAGATGCCATGTGCTGCCCT;CAAGATGGCACACATGCAGA;CGTTCTGTGCTACATGTCGT;CTCAGATGTTTGTACTACGA	-1.1;1.14;1.23;1.47	27979;70422;71386;73701	4.24E-01;1.39E+00;6.11E-01;8.60E-02	3741;6056;7020;49463	7.78E-01;1.51E+00;2.57E+00;7.79E-01
GPR162	0.682369	1.20594	4	CACAGTGTGGGAGCAATGCG;TTGTGGTGGAGGATGCCCGA;ACTCTCGTTCCAGTCATAGT;GGCGAGCGCTACTATGCCCG	-0.12;0.69;0.72;1.44	44636;63096;63687;73456	7.56E-01;8.64E-01;4.03E-01;9.18E-02	3986;13755;14346;32806	7.55E-01;8.93E-01;1.68E+00;1.49E+00
FEZ2	0.681777	1.19452	4	ACTCTCAAGAGGTCTAGTAC;ATTCCCATAATTATCTGTCA;AAGCCGATCTGACTGTGTAG;GAGGGGTTCATCATTAACAC	0.06;0.35;0.93;1.4	48986;55809;67332;73110	9.01E-01;6.14E-01;4.64E-01;1.00E-01	4332;10110;21633;28456	7.25E-01;1.11E+00;1.20E+00;1.74E+00
IRAK1	0.681676	1.23767	4	AGGAGTACATCAAGACGGGA;ATTTATCCCACAGAAAGACC;ACACGGTGTATGCTGTGAAG;GATCAACCGCAACGCCCGTG	0.26;0.4;0.86;1.21	53674;56897;66239;71202	1.10E+00;6.42E-01;4.41E-01;1.46E-01	6240;11203;20545;23768	6.01E-01;1.04E+00;1.26E+00;2.05E+00
NO_CURRENT_149	0.681349	1.19412	4	GCCAACAAGAATCGGATCCC;GCAGTACTACTGAGTTTTTC;GCCAGCGGGGATATGGTGAA;GCCACACGAATCATAAAGAG	-0.28;0.55;1.05;1.41	41223;60105;69184;73218	6.62E-01;7.42E-01;5.17E-01;9.74E-02	4224;8258;17337;36219	7.34E-01;1.26E+00;1.46E+00;1.32E+00
TTC21A	0.680972	1.26334	4	GAAGGCCCACCAGTATACTG;GAGGAGATGGGCATCCACGG;TGTGATAGAAACTTTGAACA;TGGCCACATGGACATACGAG	-0.88;0.4;1.48;1.72	30795;56975;73799;75280	4.59E-01;6.44E-01;7.88E-01;4.92E-02	2162;3643;20467;46647	9.89E-01;1.92E+00;1.27E+00;8.81E-01
TMEM41B	0.680301	1.34214	5	CAAGGCAGGCAGATCACCTG;AGCAGTAAAATGGTCACAGC;TATACTTACTCACTAAGCTG;GCTCACCACACGACCCCCGT;AGGCACCAAGTCCAGAACAC	-0.53;0.27;0.83;1.32;1.51	36237;54080;65771;72401;74013	7.27E-01;8.73E-01;8.57E-01;6.04E-01;9.83E-02	3429;5041;11671;23362;41205	7.33E-01;1.46E+00;1.61E+00;1.54E+00;1.37E+00
TATDN3	0.679982	1.45424	5	TCTTGTAAAAGGTTGATGGT;TGCCACAAGGGCCACAACAT;CAAAGCTACATCCAAATCCT;GCCGAGGCGGGCAGATCACG;ACTGGATGAACACCCAAGCA	-0.9;-0.37;1.13;1.75;1.8	30398;39315;70297;75411;75644	5.73E-01;5.12E-01;1.20E+00;9.29E-01;5.10E-02	1798;2031;7145;38128;47044	9.76E-01;2.20E+00;2.19E+00;8.26E-01;1.08E+00
RAB40AL	0.67976	1.53652	6	TCCCCGTACAGTCACCTGGG;TGAAGCTCTGGGATACGTCG;CTGGTGGGCGACAGGGACGT;CCATACCCTCGAAAGACCAG;ATATTCCGCTCCTACTCTCG;TCTACGACATTGCAAACCGC	-0.48;0.2;0.77;1.08;1.25;1.25	37170;52434;64665;69618;71670;71730	9.61E-01;1.13E+00;1.28E+00;1.00E+00;5.18E-01;2.00E-01	5712;5772;7824;12777;25008;40272	5.20E-01;1.21E+00;1.82E+00;2.11E+00;1.85E+00;1.70E+00
MAGT1	0.67928	1.37565	5	CAAGGCAGGCAGATCACCTG;GAGCGAACATGGCAGCGCGT;AAGGGGACCAGCATAATTTG;ATACATATGAGTTACAGGTG;GTGGGGCTTTCACAAGGCGA	-0.53;-0.48;0.84;1.66;1.91	36237;37106;65946;75013;76060	7.27E-01;4.89E-01;8.66E-01;8.60E-01;3.91E-02	1382;2429;11496;40336;41205	1.08E+00;2.05E+00;1.62E+00;7.54E-01;1.37E+00
DAAM1	0.67845	1.42433	5	GCAGGATGGACATGAAATGC;ACTTGGATAAAAGCACTGGG;AAAACAAGGGAGCTACAAGT;ATTGCAACATCCTTCTATCG;GCCGAGGCGGGCAGATCACG	-1.1;0.19;1.11;1.45;1.75	28024;52037;70002;73564;75411	5.23E-01;7.98E-01;1.17E+00;6.91E-01;5.77E-02	2031;3878;7440;25405;49418	9.28E-01;1.67E+00;2.14E+00;1.41E+00;9.75E-01
MAP6	0.678333	1.28861	5	CGTGGGCTTATGGCTCGCTG;CAGTGCTCAGTTCAAAGGAG;GCCGCATCACCGAGTCCGCG;CCTCAACCGGCAAATCCGCG;GCCGAGGCGGGCAGATCACG	-0.15;0.1;0.64;1.05;1.75	44047;50076;62032;69221;75411	1.01E+00;7.34E-01;6.91E-01;4.70E-01;5.77E-02	2031;8221;15410;27365;33395	9.28E-01;1.09E+00;1.30E+00;1.30E+00;1.83E+00
CYB5A	0.678035	1.14991	4	GTCCAAAACATTCATCATTG;CGGGCACTCTACAGATGCCA;CTGGCTGATCCTGCACCACA;CCTTTGAACAGCATCCTGGT	-0.42;0.19;0.93;2.01	38339;52136;67426;76349	5.94E-01;5.37E-01;4.67E-01;2.47E-02	1093;10016;25306;39103	1.27E+00;1.12E+00;1.03E+00;1.19E+00
TMEM108	0.677948	1.17446	4	AGTGCCCAGCAATACCTCAT;GCTGTCACCATGGTTCCCGG;CCTGCTGACAAAGCCACCGG;CACCGACACCCCGTGCAGAG	-0.33;0.42;1.08;1.54	40183;57465;69547;74231	6.36E-01;6.58E-01;5.30E-01;7.35E-02	3211;7895;19977;37258	8.35E-01;1.30E+00;1.29E+00;1.27E+00
LOC101927432	0.677948	1.17446	4	AGTGCCCAGCAATACCTCAT;GCTGTCACCATGGTTCCCGG;CCTGCTGACAAAGCCACCGG;CACCGACACCCCGTGCAGAG	-0.33;0.42;1.08;1.54	40183;57465;69547;74231	6.36E-01;6.58E-01;5.30E-01;7.35E-02	3211;7895;19977;37258	8.35E-01;1.30E+00;1.29E+00;1.27E+00
NUPR1	0.677769	1.30037	4	TGAGTGGGCCTTACCGAGGT;AGGGCTGGGGCGGTTGGTGT;TATAGAGGTCAGATTCATCC;TGAATCTGACCTCTATAGCC	-1.82;0.01;0.94;3.58	21133;47986;67558;77399	3.77E-01;4.77E-01;4.70E-01;9.42E-04	43;9884;29456;56309	2.65E+00;1.13E+00;8.65E-01;5.54E-01
COX14	0.676273	1.30859	4	ATACACAGTGAGAAGCATCA;GGCAAGCAGCTAGCTGACAT;TGCTTCTCACTGTGTATGGG;GGTAGACTCGGACACTGCAG	-1.27;0.81;1.02;2.15	26125;65297;68789;76657	4.06E-01;9.79E-01;5.04E-01;1.77E-02	785;8653;12145;51317	1.41E+00;1.23E+00;1.89E+00;7.15E-01
USP16	0.675314	1.33464	4	TTAAGACACAGCCAAACTGA;GTGTTACGTATGTGATAATG;AAGGAAAGATTCATGAACCA;CCTTGCCAAATAACCGTGAA	-1.22;0.2;1.66;2.06	26646;52296;75003;76477	4.11E-01;5.40E-01;9.42E-01;2.18E-02	965;2439;25146;50796	1.32E+00;2.25E+00;1.03E+00;7.33E-01
MTRNR2L2	0.675038	1.22094	4	CTTGTATGAATGGCTCCACG;TTAAAAGTCTCTTCACGGGC;TTGTATGAATGGCTCCACGA;CACGGGCAGGTCAATTTCAC	-1.07;0.47;0.96;2.34	28401;58548;67804;76929	4.29E-01;6.90E-01;4.76E-01;1.15E-02	513;9638;18894;49041	1.59E+00;1.15E+00;1.36E+00;7.94E-01
SOS2	0.675035	1.28758	5	GGCATCCCCATTATTAAAGG;CAAACCTAAGTTGTACTGGT;ACTGGCACCAGCATAAGACG;GAATCGGTGCCAAACATGAA;GCCGAGGCGGGCAGATCACG	-0.35;0.16;0.72;1.1;1.75	39660;51487;63679;69862;75411	8.38E-01;7.79E-01;7.55E-01;4.89E-01;5.77E-02	2031;7580;13763;25955;37782	9.28E-01;1.15E+00;1.42E+00;1.38E+00;1.56E+00
MRPL34	0.674913	1.20976	4	AGTAGGTCGGCAGCGTTGCT;ATTCCCGCGAGCCTTGCCCC;TTCTTGCGTTTGATGTTGCT;AACGCTGCCGACCTACTCGT	-0.41;0.75;0.9;1.45	38513;64300;66991;73584	5.97E-01;9.24E-01;4.57E-01;8.88E-02	3858;10451;13142;38929	7.67E-01;1.09E+00;1.79E+00;1.19E+00
COL6A6	0.673617	1.47885	5	TGGTCACACCCTCCCGTCGG;CCAGCTGTCAGCATACTGAA;GTTTAGCGATACCTATCACC;GCCGAGGCGGGCAGATCACG;ATCCAATAGGAACACAACAT	-1.31;-0.1;1.14;1.75;1.9	25667;44943;70375;75411;76038	4.80E-01;6.04E-01;1.20E+00;9.29E-01;3.97E-02	1404;2031;7067;32499;51775	1.07E+00;2.20E+00;2.20E+00;1.05E+00;8.74E-01
EIF1P5	0.673588	0.946888	2	TCCTGCCTCAGCCTCCCGAG;GCCGAGGCGGGCAGATCACG	-0.4;1.75	38719;75411	3.01E-01;2.31E-02	2031;38723	1.29E+00;6.02E-01
PART1	0.673588	0.946888	2	TCCTGCCTCAGCCTCCCGAG;GCCGAGGCGGGCAGATCACG	-0.4;1.75	38719;75411	3.01E-01;2.31E-02	2031;38723	1.29E+00;6.02E-01
LOC102723536	0.673588	0.946888	2	TCCTGCCTCAGCCTCCCGAG;GCCGAGGCGGGCAGATCACG	-0.4;1.75	38719;75411	3.01E-01;2.31E-02	2031;38723	1.29E+00;6.02E-01
LOC107985239	0.673588	0.946888	2	TCCTGCCTCAGCCTCCCGAG;GCCGAGGCGGGCAGATCACG	-0.4;1.75	38719;75411	3.01E-01;2.31E-02	2031;38723	1.29E+00;6.02E-01
LOC101927478	0.673588	0.946888	2	TCCTGCCTCAGCCTCCCGAG;GCCGAGGCGGGCAGATCACG	-0.4;1.75	38719;75411	3.01E-01;2.31E-02	2031;38723	1.29E+00;6.02E-01
KIF9-AS1	0.673588	0.946888	2	TCCTGCCTCAGCCTCCCGAG;GCCGAGGCGGGCAGATCACG	-0.4;1.75	38719;75411	3.01E-01;2.31E-02	2031;38723	1.29E+00;6.02E-01
LOC105373831	0.673588	0.946888	2	TCCTGCCTCAGCCTCCCGAG;GCCGAGGCGGGCAGATCACG	-0.4;1.75	38719;75411	3.01E-01;2.31E-02	2031;38723	1.29E+00;6.02E-01
LOC105373150	0.673588	0.946888	2	TCCTGCCTCAGCCTCCCGAG;GCCGAGGCGGGCAGATCACG	-0.4;1.75	38719;75411	3.01E-01;2.31E-02	2031;38723	1.29E+00;6.02E-01
LINC01841	0.673588	0.946888	2	TCCTGCCTCAGCCTCCCGAG;GCCGAGGCGGGCAGATCACG	-0.4;1.75	38719;75411	3.01E-01;2.31E-02	2031;38723	1.29E+00;6.02E-01
LOC107986047	0.673588	0.946888	2	TCCTGCCTCAGCCTCCCGAG;GCCGAGGCGGGCAGATCACG	-0.4;1.75	38719;75411	3.01E-01;2.31E-02	2031;38723	1.29E+00;6.02E-01
NR2F2-AS1	0.673588	0.946888	2	TCCTGCCTCAGCCTCCCGAG;GCCGAGGCGGGCAGATCACG	-0.4;1.75	38719;75411	3.01E-01;2.31E-02	2031;38723	1.29E+00;6.02E-01
EPCAM	0.673282	1.36653	4	GGGCCCTCCAGAACAATGAT;AGTGTTCACACACCAGCACA;GGTTCTCACTCGCTCAGAGC;GTGCACCAACTGAAGTACAC	-1.14;0.99;1.29;1.54	27551;68399;72146;74260	4.20E-01;1.20E+00;6.55E-01;7.29E-02	3182;5296;9043;49891	8.39E-01;1.61E+00;2.25E+00;7.64E-01
ZER1	0.673234	1.58703	5	AGGCTGAAGAAGCTCTCGTG;CAGGGACCCAATCAATCATG;CAAGTTCAAGCTGACTCGGG;GCCGAGGCGGGCAGATCACG;GGCAGGACGAGTCTATCCAG	-1.92;0.43;1.09;1.75;2.02	20330;57570;69713;75411;76385	4.11E-01;1.03E+00;1.14E+00;9.29E-01;2.98E-02	1057;2031;7729;19872;57112	1.19E+00;2.20E+00;2.09E+00;1.79E+00;6.61E-01
ABCD1	0.673219	1.31525	5	AGTTCCTCATGAAGTATGTG;GATCATGTCGTCGTACAAGG;CTACATGCACTCGCGTGTGG;GGCCACATACACCGACAGGA;GCCGAGGCGGGCAGATCACG	0.05;0.16;0.19;1.22;1.75	48855;51400;52132;71313;75411	1.23E+00;7.76E-01;4.87E-01;5.46E-01;5.77E-02	2031;6129;25310;26042;28587	9.28E-01;1.31E+00;8.01E-01;1.37E+00;2.16E+00
SLC10A4	0.672466	1.26366	4	ATCGTGCAGTTACTACCCCT;AGATTGGAGAGATTGCCGCC;GACGGACGTGCGCCCCGAAG;CTGAAGCCGAAGCTCGGACC	-0.68;0.88;1.08;1.41	33705;66559;69602;73259	5.04E-01;1.06E+00;5.32E-01;9.64E-02	4183;7840;10883;43737	7.38E-01;1.30E+00;2.02E+00;9.93E-01
APOD	0.672236	1.38043	4	AAAGATCAAAGTGTTAAACC;GGAACTGTGAATCAAATCGA;CTCTGCAGTATCTCGGAAGA;AGGATCCAGTACGGTGCCGA	0.58;0.61;0.72;0.79	60751;61351;63640;64914	1.50E+00;7.89E-01;4.03E-01;3.07E-01	12528;13802;16091;16691	4.19E-01;8.90E-01;1.55E+00;2.67E+00
TRIM43CP	0.671889	0.720739	1	AATGTGTCATAAACCAGATG	0.67	62711	0.0916	14731	0.721
BPIFC	0.6717	1.34754	5	ATCAAAGCGCTAACCAACCA;TGTCACTCTCTCCACCGAAG;TCAAGGCAAGGATTACTCAG;GATACCGGTAAAGTAGACTC;GCCGAGGCGGGCAGATCACG	-0.78;0.52;0.83;1.04;1.75	32277;59530;65631;69123;75411	6.18E-01;1.14E+00;8.49E-01;4.67E-01;5.77E-02	2031;8319;11811;17912;45165	9.28E-01;1.09E+00;1.59E+00;1.96E+00;1.17E+00
LARP4B	0.670555	1.42628	6	AATATCTGAATCTACCCCCG;CAAGGCAGGCAGATCACCTG;TGCGTTGCTGACCACGTCTG;CCAGTATGTGCCAATCACAA;GCCGAGGCGGGCAGATCACG;GGAACTTGCCTGCTTCGAGG	-0.8;-0.53;-0.22;0.91;1.75;2.92	31980;36237;42344;67060;75411;77308	7.63E-01;5.80E-01;5.17E-01;8.19E-01;8.61E-01;4.48E-03	134;2031;10382;35098;41205;45462	1.99E+00;2.03E+00;1.50E+00;7.23E-01;9.22E-01;1.39E+00
RIOK3	0.670032	1.26871	4	GCTGGCTCAGATGCTACAGA;AACATGATGAAGTAGTATGT;CGTGATGATCCCTACAGACC;ACGTAAGATCATCCGCATGT	0.3;0.57;0.78;1.03	54622;60540;64867;68957	1.14E+00;7.58E-01;4.18E-01;2.02E-01	8485;12575;16902;22820	5.09E-01;9.55E-01;1.49E+00;2.12E+00
NLRP11	0.669768	1.29168	4	AGTTTACCTTCAATCAGACA;CTTTGGATACCAGCTACCGA;GTGTTGCCAATCTCTTATGA;CAGATGTGTTGGGTTTACTG	-0.8;0.99;1.01;1.48	31953;68289;68713;73775	4.76E-01;1.19E+00;5.02E-01;8.42E-02	3667;8729;9153;45489	7.86E-01;1.22E+00;2.23E+00;9.24E-01
CHD3	0.668863	1.18017	4	ACCATATGACCAGTCCACGT;TTTCCACTCACTGTGCATCG;TTTGAGGCCTTGAATTCACG;CTCACCATTAAACCGATCGA	0.08;0.29;0.89;1.42	49647;54475;66675;73292	9.26E-01;5.83E-01;4.50E-01;9.57E-02	4150;10767;22967;27795	7.41E-01;1.07E+00;1.13E+00;1.78E+00
TSHZ3	0.668664	1.24107	4	ATCACGCCAAATAATCGGTA;CCAACTCTGCTATGAAAAAG;AGTGACATCCGCAATCAACA;TTCATGGCAGGAAAACTCGG	0.28;0.36;0.92;1.11	54298;55954;67270;70062	1.13E+00;6.18E-01;4.63E-01;1.74E-01	7380;10172;21488;23144	5.49E-01;1.11E+00;1.21E+00;2.10E+00
FLRT3	0.668579	1.16766	4	AACCCCAGGGAATTGTGCTA;AACACAGTGTATCCTGCCCA;CATTCCAACAGGAATACCAG;ACAGCTCTGTCAAATTAACT	0.05;0.22;0.88;1.53	48862;52869;66494;74151	8.97E-01;5.50E-01;4.46E-01;7.54E-02	3291;10948;24573;28580	8.26E-01;1.05E+00;1.06E+00;1.73E+00
ZNF205	0.668406	1.47446	4	CACGCAGCAGAACTTCTACA;TCCCCGTGCTTTCCCGAGAG;GAGGGTGCAGACCTCATCCG;GGCTGAGCCAGATCGCACCC	-1.49;1.07;1.51;1.59	23933;69497;73997;74577	3.90E-01;1.29E+00;8.09E-01;6.55E-02	2865;3445;7945;53509	8.79E-01;1.97E+00;2.41E+00;6.42E-01
ICOSLG	0.66819	1.29746	5	CATCCATAAACGGCTACCCC;GGTGACGTTGAACAAGCGCA;CTGCAGCAGAACCTGACTGT;TCAGCGTGCTGAGGATCGCA;GCCGAGGCGGGCAGATCACG	-0.48;0.46;0.53;1.08;1.75	37125;58344;59824;69642;75411	7.54E-01;1.07E+00;6.22E-01;4.82E-01;5.77E-02	2031;7800;17618;19098;40317	9.28E-01;1.13E+00;1.15E+00;1.86E+00;1.42E+00
LOC102723996	0.66819	1.29746	5	CATCCATAAACGGCTACCCC;GGTGACGTTGAACAAGCGCA;CTGCAGCAGAACCTGACTGT;TCAGCGTGCTGAGGATCGCA;GCCGAGGCGGGCAGATCACG	-0.48;0.46;0.53;1.08;1.75	37125;58344;59824;69642;75411	7.54E-01;1.07E+00;6.22E-01;4.82E-01;5.77E-02	2031;7800;17618;19098;40317	9.28E-01;1.13E+00;1.15E+00;1.86E+00;1.42E+00
PHF20	0.667572	1.83771	8	GGAATCTCACTCTGTCACCC;CAAGGCAGGCAGATCACCTG;ATGGACCCCTGGCTTGTGTG;TCGAAGCATTCAGCAAACAA;ATTACAAGAGATTTCGACTG;AGAACCACTCATCATAACGA;GCCGAGGCGGGCAGATCACG;ACACTGACAAAGACTTATCG	-1.53;-0.53;0.61;0.79;0.93;1.4;1.75;1.92	23634;36237;61344;65014;67423;73151;75411;76103	7.19E-01;8.57E-01;1.97E+00;1.64E+00;1.22E+00;1.21E+00;7.59E-01;6.06E-02	1339;2031;4291;10019;12428;16098;41205;53808	9.12E-01;1.78E+00;2.15E+00;1.95E+00;2.45E+00;2.85E+00;1.34E+00;1.27E+00
FAM222A	0.667459	1.17019	4	AGCCACCCAAGCCTTGACGT;GTCAATGGCTATGACACCAG;AAGTGTGCTCAAGAGCGCCG;ACTGGACGCCTATGCCGAGA	-0.13;0.56;0.78;1.46	44349;60376;64813;73671	7.48E-01;7.52E-01;4.17E-01;8.67E-02	3771;12629;17066;33093	7.75E-01;9.52E-01;1.48E+00;1.48E+00
FAM222A-AS1	0.667459	1.17019	4	AGCCACCCAAGCCTTGACGT;GTCAATGGCTATGACACCAG;AAGTGTGCTCAAGAGCGCCG;ACTGGACGCCTATGCCGAGA	-0.13;0.56;0.78;1.46	44349;60376;64813;73671	7.48E-01;7.52E-01;4.17E-01;8.67E-02	3771;12629;17066;33093	7.75E-01;9.52E-01;1.48E+00;1.48E+00
GLS	0.666375	1.73841	6	GAGCACGCATCCGCAGCCCG;CAAGGCAGGCAGATCACCTG;AAATTCAGTCCCGATTTGTG;ATTGCTCCAGCATTTACCAT;GCCGAGGCGGGCAGATCACG;GATTGCGAACGTCTGATCCC	-1.54;-0.53;1.0;1.56;1.75;1.76	23493;36237;68554;74397;75411;75487	5.25E-01;5.80E-01;1.68E+00;1.70E+00;8.61E-01;6.66E-02	1955;2031;3045;8888;41205;53942	8.75E-01;2.03E+00;2.97E+00;2.69E+00;9.22E-01;9.42E-01
LINGO4	0.665959	1.1591	4	TTAGAGAACTGGATATTGGG;CCGGAGCCACAAATACCAGG;TAACGCCCTTCAGACACTAG;TACAAAGCCTACTCACCCTG	-0.16;0.52;0.75;1.56	43784;59534;64197;74354	7.31E-01;7.22E-01;4.09E-01;7.07E-02	3088;13245;17908;33658	8.50E-01;9.19E-01;1.42E+00;1.45E+00
ADK	0.665514	1.42725	6	CAAGGCAGGCAGATCACCTG;AAAGTCGAATATCATGCTGG;ACAGCAGAGATGTCAAGCAG;TCTGGAGAAAAACTGGATGT;GTAGTAATGAGCATCCACAT;GCCGAGGCGGGCAGATCACG	-0.53;0.1;0.38;0.55;1.75;1.75	36237;50135;56484;60190;75409;75411	9.22E-01;1.01E+00;8.13E-01;5.66E-01;8.61E-01;6.92E-02	2031;2033;17252;20958;27307;41205	8.61E-01;2.03E+00;9.84E-01;1.37E+00;1.67E+00;1.64E+00
PDZD2	0.664353	1.57615	7	CAAGGCAGGCAGATCACCTG;GTGACCGAACTGCGAAAAAG;ATACAGCACTCCGAGAGAGT;ACTGGTATTGAAGTTCGGGG;TGAGTGACAACGATAGCGTG;TGACCCAGGTAAATCACAAG;GCCGAGGCGGGCAGATCACG	-0.53;0.28;0.43;0.67;0.99;1.06;1.75	36237;54327;57636;62740;68348;69284;75411	1.13E+00;1.61E+00;1.21E+00;9.87E-01;8.10E-01;4.22E-01;8.08E-02	2031;8158;9094;14702;19806;23115;41205	8.05E-01;8.74E-01;1.46E+00;1.62E+00;1.90E+00;2.46E+00;1.92E+00
NDUFAF7	0.663871	1.29419	4	GACACCTTTCATATACACTG;GGTGTTGACTAATCCAGCCA;AATAAGTCAAATCTTTGGGG;CACAGGTTTCTGATAAACTG	-0.86;0.92;1.2;1.41	30968;67187;71057;73187	4.61E-01;1.10E+00;5.94E-01;9.81E-02	4255;6385;10255;46474	7.32E-01;1.46E+00;2.09E+00;8.87E-01
RILP	0.663506	1.33833	4	GCCATGACTCACCGAGTCCG;GCAGTGCCGCTTCAGTCGGG;GCTTGTGTACCATCTAGCCG;AGGCTAAAGAGCGAGCGCGG	-1.0;-0.57;1.6;2.63	29148;35715;74611;77175	4.38E-01;4.31E-01;8.84E-01;5.98E-03	267;2831;41727;48294	1.86E+00;2.13E+00;5.40E-01;8.20E-01
BRCC3	0.662926	1.15805	4	AGTAATGGGGCTGTGCATAG;TTTCCTTTGATAGACTGGCC;GCTCTGGAGAAATTTCTACT;GAGCGTGGTTGAGACAAACG	-0.47;0.33;1.12;1.67	37275;55454;70141;75052	5.71E-01;6.06E-01;5.53E-01;5.44E-02	2390;7301;21988;40167	9.49E-01;1.36E+00;1.18E+00;1.14E+00
SMLR1	0.662589	1.22376	4	GCAGCAGCAAAGTCACGGGG;CCAACCACACAGACCCCACG;GAAAACAAGTACAGACTCAG;GGGAGTCACACTCAGGACCA	0.3;0.44;0.47;1.44	54760;57918;58412;73471	1.15E+00;6.71E-01;3.75E-01;9.14E-02	3971;19030;19524;22682	7.57E-01;6.86E-01;1.32E+00;2.13E+00
NO_CURRENT_185	0.66174	1.18624	4	GTCCCGTGATTTTAGCCAGG;GTCATCAGCGATTTGACGAG;GTCCAATAAAAAGTGCCACT;GTCAGGTAATAGTCGGACTC	0.13;0.34;0.36;1.81	50762;55607;56054;75729	9.70E-01;6.09E-01;3.78E-01;3.88E-02	1713;21388;21835;26680	1.08E+00;6.20E-01;1.19E+00;1.85E+00
ELMO3	0.661645	1.28486	4	GGGCACAGAGGGAACGGCGA;CCTGGCAAAGATCATGTCCG;GAACCAGCAGCTGCAAACCA;TGCCATTCTTGATCTCCGCG	0.44;0.47;0.72;1.02	57886;58554;63593;68745	1.32E+00;6.90E-01;4.02E-01;2.07E-01	8697;13849;18888;19556	5.03E-01;8.88E-01;1.36E+00;2.39E+00
C4orf19	0.661425	1.31074	5	GTGTGCTGCTGGCCTCAGAA;TGCAGAAAAATGACCCTCAG;TTCATTGACATAGCCAGGAG;CCAGATTACCTTCAGCATTG;GCCGAGGCGGGCAGATCACG	0.15;0.25;0.35;0.82;1.75	51190;53382;55698;65492;75411	1.36E+00;8.46E-01;5.33E-01;4.04E-01;5.77E-02	2031;11950;21744;24060;26252	9.28E-01;8.42E-01;9.41E-01;1.49E+00;2.35E+00
ALDH3A2	0.660888	1.17787	4	TCTCCCTCAGTATTTAGACC;TGGTGCTGATAATCGGAGCT;GATGAGGCCACACGCTACAT;TGGGGAAAATACATGAATTG	0.0;0.24;1.08;1.32	47404;53224;69619;72457	8.45E-01;5.57E-01;5.32E-01;1.16E-01	4985;7823;24218;29876	6.76E-01;1.31E+00;1.08E+00;1.65E+00
SLC22A14	0.66056	1.24608	4	GATGCTGTTACGCAGATTGA;GAAGCGATCGCTGATCAATG;ACCATACCCCAAGCACCCAA;ACAGCCACTGAGTGGTTAGT	0.23;0.55;0.82;1.04	53123;60244;65539;69010	1.07E+00;7.47E-01;4.29E-01;2.00E-01	8432;11903;17198;24319	5.11E-01;9.93E-01;1.47E+00;2.01E+00
NRDC	0.659644	1.17515	4	CGAGACAAGAAATCTTTATG;CATCTCTGATCATTAGTGGG;AGCCTTCAACGTAAAGTCCG;TCATGCTCTGACCATCACAT	-0.48;0.42;1.2;1.49	37149;57479;71132;73897	5.68E-01;6.58E-01;5.98E-01;8.14E-02	3545;6310;19963;40293	7.98E-01;1.47E+00;1.29E+00;1.13E+00
TRIM7	0.659556	1.21572	4	AAGCTCTACTGCCAGGACGA;CTGAGACCCGTGCTCTCCCG;GAGCCGGTGTCCGTCGAGTG;TCCTCCTCAGAGGACCTTCG	0.08;0.44;1.03;1.09	49556;57751;68906;69831	9.23E-01;6.66E-01;5.08E-01;1.80E-01	7611;8536;19691;27886	5.40E-01;1.24E+00;1.31E+00;1.77E+00
PIGR	0.659136	1.178	4	TCTGTGCCGACAGAGCAGTG;CATCCGAATGGGCTCCACAC;CCTCCAGAGAGTATCGCCGT;GCACCAGTATTTCTCGTACG	-0.44;0.46;1.19;1.43	37861;58251;71006;73385	5.83E-01;6.81E-01;5.91E-01;9.35E-02	4057;6436;19191;39581	7.49E-01;1.46E+00;1.34E+00;1.17E+00
ZCCHC13	0.658691	1.18967	4	ACAGGTGTAAGATAGGGTGG;GAAACATCTGCTACAACTGT;ACAGTTCTTAGCATTACGAC;CAGATGTCCTAGTCTGCCGC	0.23;0.35;0.59;1.46	53020;55753;61094;73678	1.07E+00;6.13E-01;3.82E-01;8.65E-02	3764;16348;21689;24422	7.76E-01;7.79E-01;1.20E+00;2.00E+00
SMTN	0.658574	1.13351	4	GGAGTCCATGAACGATGTGG;CCCTTGAAAACAGAGCAGGG;CCCACTCAGAACTGACACTG;GCAAGGGGCTAGCGGCACAC	-0.1;0.04;0.62;2.08	44978;48716;61582;76512	7.67E-01;4.86E-01;3.85E-01;2.10E-02	930;15860;28726;32464	1.33E+00;7.98E-01;8.91E-01;1.51E+00
NDC80	0.658351	1.21641	4	TAATAAATTAACCAAGGACC;TGTCAGGAAGTTCGTATGAG;GGGAAATACTCACGTTTGAG;GGATCCCGGAATAGTCAACT	-1.19;0.06;1.0;2.76	26998;49102;68560;77250	4.14E-01;4.91E-01;4.97E-01;4.29E-03	192;8882;28340;50444	2.01E+00;1.21E+00;9.06E-01;7.45E-01
RCBTB2	0.657708	1.18842	4	TCACTCCACACACACGTCTG;TAGTTGTGACCATAGCATGT;TTTAAAGAATCCAGTCTCCG;GCTATAAGCATTATGACCCC	-0.42;-0.18;1.36;1.88	38224;43175;72768;75967	5.91E-01;4.38E-01;6.98E-01;3.34E-02	1475;4674;34267;39218	1.14E+00;1.71E+00;7.14E-01;1.18E+00
GLA	0.657032	1.34056	5	TCTGGGTCATTCCAACCCCC;CAAGGCAGGCAGATCACCTG;GTTGGAAATAAAACCTGCGC;ATTGGCAAGGACGCCTACCA;CAATATCTGATACCTGATGC	-0.53;-0.53;0.36;1.79;2.21	36233;36237;55964;75597;76766	7.27E-01;4.82E-01;5.37E-01;9.66E-01;1.90E-02	676;1845;21478;41205;41209	1.38E+00;2.28E+00;9.53E-01;7.27E-01;1.37E+00
ANKRD36	0.656696	1.83128	5	CTTCCCTAAATAAATCAGCG;CAGGCTACAAGTGACGAGGA;CATTCAGGGTACAAGTGACG;GCCGAGGCGGGCAGATCACG;ATAAAGGATGGACTACAGTG	-2.67;0.32;1.67;1.75;2.22	13120;55063;75066;75411;76778	3.95E-01;9.14E-01;2.07E+00;9.29E-01;1.87E-02	664;2031;2376;22379;64305	1.38E+00;2.20E+00;3.57E+00;1.61E+00;4.04E-01
GNAI1	0.656512	1.41777	5	TCTTAACAGAATGTTTGATG;TGAAGCTGGTTATTCAGAAG;TTGCTATCATTAGGGCTATG;AGCACTGAGTGACTACGACC;GCCGAGGCGGGCAGATCACG	-1.22;0.34;1.15;1.26;1.75	26679;55541;70540;71792;75411	4.98E-01;9.34E-01;1.22E+00;5.70E-01;5.77E-02	2031;5650;6902;21901;50763	9.28E-01;1.37E+00;2.23E+00;1.64E+00;9.17E-01
LOC107986642	0.65612	0.711059	1	CCAGACCGGGGAAATCGACG	0.66	62379	0.0939	15063	0.711
BCLAF1P2	0.656103	0.954481	2	AGACGACCTTATGGGTACAG;GCTTGATAGGGGTAATACCA	-0.48;1.79	37182;75633	3.02E-01;2.05E-02	1809;40260	1.34E+00;5.68E-01
MTURN	0.656067	1.18049	4	CCACCGAGGAGACCGAACGC;ATGGATTTCTACGCCGACCC;GCACGTGTGGAGTGAGAGCG;GCACCATTTCTCCGCAACGT	-0.37;0.68;0.92;1.4	39286;62805;67209;73166	6.15E-01;8.51E-01;4.62E-01;9.86E-02	4276;10233;14637;38156	7.30E-01;1.10E+00;1.66E+00;1.23E+00
EEF1E1	0.655645	1.28245	5	ACAGGGTCACTCAAGTAGAT;AAAAAGCAATCGTTCAGCAG;AAGATAAAGTCTACCTTACA;CCAGTTCTTCAGACAAACAA;GCCGAGGCGGGCAGATCACG	-0.14;0.04;0.22;1.41;1.75	44190;48633;52863;73221;75411	1.01E+00;6.92E-01;4.94E-01;6.62E-01;5.77E-02	2031;4221;24579;28809;33252	9.28E-01;1.60E+00;8.27E-01;1.22E+00;1.84E+00
FRAS1	0.655606	1.13156	4	ACCCCGGTCACATATACACG;TTCCATGACTATATTCTACG;CACCAGCACAGTATCCCACG;TCTTGCGTGAAATACCGGAT	-0.41;0.16;0.98;1.88	38613;51406;68242;75987	6.00E-01;5.25E-01;4.88E-01;3.29E-02	1455;9200;26036;38829	1.15E+00;1.18E+00;9.96E-01;1.20E+00
THNSL2	0.655551	1.20211	4	TGAGGCTGTTAAATCAACCT;ACTGCCACGACCAGACGGAT;ATTATCGTTCTGCTGCCCAA;TGTCCAAGGATGGCGTACAC	-0.55;0.75;0.99;1.43	36006;64202;68317;73433	5.45E-01;9.19E-01;4.90E-01;9.23E-02	4009;9125;13240;41436	7.53E-01;1.19E+00;1.78E+00;1.09E+00
KCNA6	0.654398	1.23605	4	CGACCATCTACACGGAACTG;TCCTCCAGGAAAATGTCCAG;GCCCCCAAGAGTACTGAGTG;GGGGCTGCTGTAGTAGCGAG	-0.99;0.7;1.15;1.76	29317;63236;70468;75479	4.40E-01;8.71E-01;5.66E-01;4.46E-02	1963;6974;14206;48125	1.03E+00;1.39E+00;1.70E+00;8.26E-01
LOC105369614	0.654398	1.23605	4	CGACCATCTACACGGAACTG;TCCTCCAGGAAAATGTCCAG;GCCCCCAAGAGTACTGAGTG;GGGGCTGCTGTAGTAGCGAG	-0.99;0.7;1.15;1.76	29317;63236;70468;75479	4.40E-01;8.71E-01;5.66E-01;4.46E-02	1963;6974;14206;48125	1.03E+00;1.39E+00;1.70E+00;8.26E-01
GPD1L	0.65437	1.52484	6	GGAATCTCACTCTGTCACCC;TCCTTGTAGGGCATAGACGA;AGCCTCGCTAAGATTTGACA;AAAGACCCACATCTTGACTG;GCCGAGGCGGGCAGATCACG;GATTCTGTGAATGAACTGGT	-1.53;-0.1;0.49;1.19;1.75;2.12	23634;45018;58917;71027;75411;76614	5.28E-01;8.08E-01;9.19E-01;1.14E+00;8.61E-01;2.80E-02	828;2031;6415;18525;32424;53808	1.22E+00;2.03E+00;2.06E+00;1.55E+00;1.35E+00;9.49E-01
MED24	0.654032	1.20639	4	GCTGCACATCGCCAAACTAG;GCCCGGAAATTCATCAAGTG;GAAGTACTCTCATGGAGACA;CCTCGAGCAGGATCACGGCG	0.14;0.53;0.76;1.18	51082;59796;64423;70888	9.83E-01;7.31E-01;4.12E-01;1.54E-01	6554;13019;17646;26360	5.86E-01;9.31E-01;1.44E+00;1.87E+00
GPR82	0.653267	1.24438	4	CAAGTAAGTTTGCAGTCACA;GCATGAAGTAGTCTCTTGCG;CCTATGCTACAATCGGCAGA;AAACACCAACAATACAAAGG	0.32;0.36;0.92;1.02	55031;56118;67197;68760	1.16E+00;6.22E-01;4.61E-01;2.07E-01	8682;10245;21324;22411	5.03E-01;1.10E+00;1.22E+00;2.15E+00
USP38	0.653151	1.14808	4	TCTCTATGAACCTATTCTGG;GCTGATTATGAGCTGTCCGT;CTCACCGTCACTTGTACGAG;GAAGCCTCAAAGAATATCCG	0.0;0.31;0.51;1.8	47445;54836;59324;75652	8.46E-01;5.91E-01;3.76E-01;4.06E-02	1790;18118;22606;29773	1.06E+00;7.15E-01;1.15E+00;1.66E+00
LOC105369333	0.65306	0.945309	2	TCACTGTGGCTAGCGACAGG;GTGGCCCATGAGCAGGTACG	0.61;0.7	61397;63231	4.83E-01;1.76E-01	14212;16045	5.23E-01;1.37E+00
RPL29P33	0.652885	0.709103	1	AGGCAAGTCGATCGAGCTTG	0.65	62311	0.0944	15131	0.709
OR10G1P	0.651914	0.708358	1	AGGCCAGTCTCAATACTGCG	0.65	62284	0.0946	15157	0.708
RFPL2	0.651525	1.39558	6	AGTCCAGAATCCAAGCTCTG;CTGTGGCCGCCACTGCTGGG;AATCTGTTCACCGCAAAGGG;GCAGTGAATTAATGCACTTG;TGTGGGGAAGGGGCACACGA;TGTCTATGTGCTGTATTGTG	-0.03;0.02;0.21;0.64;1.35;1.71	46731;48240;52609;62062;72701;75231	1.45E+00;9.29E-01;6.85E-01;6.13E-01;5.72E-01;7.54E-02	2211;4741;15380;24833;29202;30711	8.29E-01;1.36E+00;1.09E+00;1.14E+00;1.55E+00;2.41E+00
ZCCHC18	0.651423	1.16719	4	GGTCTGAGCCAATAATGGAG;GCCAGATTGGAGTATGTCTG;GCAAGAAATCTGCTACACTT;CCTCCCCAGAGACCTCAACA	0.06;0.45;0.68;1.42	49128;58087;62789;73300	9.07E-01;6.76E-01;3.94E-01;9.55E-02	4142;14653;19355;28314	7.41E-01;8.50E-01;1.33E+00;1.75E+00
KIR2DS1	0.651202	1.15281	4	CATTGGAGAACACCATGATG;TCTCTCCTGCCAGAACCGTG;ATGAACGTAGGCTCCCTGCA;TCCGTGACTCTCCATACGAG	-0.3;0.0;0.24;2.66	40676;47512;53361;77198	6.48E-01;4.72E-01;3.90E-01;5.46E-03	244;24081;29792;36765	1.90E+00;5.60E-01;8.53E-01;1.29E+00
RPUSD3	0.650004	1.23036	4	AGGCATCAGAGGCAACCCCG;GACTCTCAGTCACTTTCGTG;GTGACGTTGAACAAGCCACA;TCCCAGCACCTCTCACCAGT	0.27;0.57;0.6;1.17	54045;60515;61114;70688	1.11E+00;7.57E-01;3.82E-01;1.59E-01	6754;16328;16927;23397	5.76E-01;7.80E-01;1.49E+00;2.08E+00
SDHA	0.648947	1.38846	4	ATAAGGTGTGCAATAGCGAG;GCCCATCACCTCGACCACGG;TGTCATCGCACTGTGCATAG;ACCGTGCATTATAACATGGG	-1.02;1.19;1.19;1.24	28918;70934;71008;71568	4.35E-01;1.45E+00;5.91E-01;1.37E-01	5874;6434;6508;48524	6.21E-01;1.46E+00;2.66E+00;8.12E-01
GPR173	0.648916	1.14038	4	TGCGGTGACGATACTCGAAG;GTGCCCACGTCAAAGACAGG;TTCACATAAGCTGATGCGGA;GTAGTAAGGAGCCTTGTGCA	-0.04;0.4;0.72;1.52	46386;56933;63611;74119	8.11E-01;6.43E-01;4.02E-01;7.62E-02	3323;13831;20509;31056	8.23E-01;8.89E-01;1.26E+00;1.59E+00
ME2	0.646684	1.16462	4	AGTATCAGGTATGCTCTCTG;GCTGAACCCAAGAACAAACA;GCCAATTGTATATACACCGA;GTTCCCACATCAATACACAC	-0.19;0.55;0.94;1.28	43116;60312;67540;71993	7.12E-01;7.49E-01;4.69E-01;1.27E-01	5449;9902;17130;34326	6.46E-01;1.13E+00;1.47E+00;1.41E+00
KCNMB3	0.646407	1.15816	4	ACGGGTACTTCCCCTGACCG;GCCTCTTGTGCACATCTAGT;TCATCCTGCTCACGAGACAC;CATGGCAAACCCCAGCATCA	0.02;0.46;0.66;1.44	48305;58284;62381;73522	8.77E-01;6.82E-01;3.91E-01;9.02E-02	3920;15061;19158;29137	7.61E-01;8.32E-01;1.34E+00;1.70E+00
TCEAL1	0.646199	1.12656	4	CCGAGAGGAGCATCTCAGGC;TCCCGAAAAGCAGTCCCCCG;TTCGGAGGAGCAGTCCTCGG;TCGGTCTTGGGCGCGCTCTG	-0.16;0.2;0.46;2.09	43665;52465;58150;76537	7.28E-01;5.43E-01;3.75E-01;2.04E-02	905;19292;24977;33777	1.35E+00;6.78E-01;1.04E+00;1.44E+00
CNTN1	0.645526	1.16583	4	AGCATCTAATAACTACGGGA;CTGTTCCGGATATCCGATGG;AAGAGAATATTCACTACCAG;GGGGCCAATATAATTCGCGT	-0.02;0.51;0.83;1.26	46841;59473;65621;71833	8.26E-01;7.20E-01;4.30E-01;1.31E-01	5609;11821;17969;30601	6.36E-01;9.98E-01;1.42E+00;1.61E+00
CFAP57	0.645507	1.21975	4	TTGCACTCAGCACCCATCAC;ATGGTCAAGGAACCTACCAA;GCACAGTCTCAGAGATAGCG;CAGTAGACAAGATTTGACTC	-0.95;0.42;1.37;1.74	29761;57446;72906;75370	4.45E-01;6.57E-01;7.09E-01;4.71E-02	2072;4536;19997;47681	1.01E+00;1.74E+00;1.29E+00;8.43E-01
LOC105378685	0.645507	1.21975	4	TTGCACTCAGCACCCATCAC;ATGGTCAAGGAACCTACCAA;GCACAGTCTCAGAGATAGCG;CAGTAGACAAGATTTGACTC	-0.95;0.42;1.37;1.74	29761;57446;72906;75370	4.45E-01;6.57E-01;7.09E-01;4.71E-02	2072;4536;19997;47681	1.01E+00;1.74E+00;1.29E+00;8.43E-01
GPR139	0.644527	1.23715	5	TCCTGCCTCAGCCTCCCGAG;GCCCCTCACCTGGTAAACCG;TGCCAAGAGATAGTTGTAGG;GAGACCGTGTGGTACTTGAG;GATGAGGACGTGATGCACAG	-0.4;0.01;0.69;0.98;1.94	38719;47882;63138;68181;76154	8.06E-01;6.72E-01;7.33E-01;4.45E-01;3.64E-02	1288;9261;14304;29560;38723	1.11E+00;1.01E+00;1.38E+00;1.18E+00;1.51E+00
KLHL4	0.644382	1.16118	4	TTGGCACCATGAATGGCCGT;TGTGTAAGCATACTGCACCA;AAAGCCTAGAAAATCAACTG;ATATGAGCATAGAGGGACCC	0.05;0.47;0.51;1.55	48968;58443;59282;74286	9.01E-01;6.87E-01;3.76E-01;7.23E-02	3156;18160;18999;28474	8.42E-01;7.14E-01;1.35E+00;1.74E+00
AVIL	0.643493	1.43524	5	CAAGGCAGGCAGATCACCTG;CAGTCACAGAGGTAGCAACA;CATACCATTGATACTCCACA;ATTTGGAAGAGTCTTACTGG;GCCATGTCTAAAGCGCTGGT	-0.53;0.83;0.9;0.92;1.1	36237;65650;66877;67305;69942	7.27E-01;1.60E+00;9.21E-01;4.28E-01;2.21E-01	7500;10137;10565;11792;41205	4.92E-01;9.49E-01;1.72E+00;2.64E+00;1.37E+00
ESX1	0.64339	1.31375	4	TCACGGTCTTGGTCGTCCGA;ACTTACCGTGACCTCGCTGA;CCAAGAACATGTCCAAAGGG;AATATCCCGACGTTGTGGCG	-1.35;0.76;1.32;1.84	25350;64438;72435;75822	4.00E-01;9.31E-01;6.74E-01;3.67E-02	1620;5007;13004;52092	1.10E+00;1.66E+00;1.80E+00;6.89E-01
POLR2KP2	0.6432	0.703627	1	GCTAACAATGGACACCCAGA	0.64	62119	0.0957	15323	0.704
IDH3B	0.643004	1.17673	4	AGCTAGCCTCCTATGATATG;TCACACGAGCCAAGTCTCAG;TTGTGCCGAGTCATATACCC;CACAAGGCCAACATCATGTG	0.05;0.54;0.7;1.28	48837;60053;63376;71977	8.96E-01;7.40E-01;4.00E-01;1.27E-01	5465;14066;17389;28605	6.45E-01;8.78E-01;1.45E+00;1.73E+00
HOXC13-AS	0.642662	1.11457	4	CGTAGTAGCTGCCCCCGAAG;AGTGCTGGTAGCCTTCGACG;TCCGTATAGACGGCGCCCTG;CCGGGTATTTATCGCCCGGG	-0.49;0.24;0.69;2.13	37043;53270;63122;76618	5.66E-01;5.58E-01;3.97E-01;1.86E-02	824;14320;24172;40399	1.38E+00;8.66E-01;1.08E+00;1.13E+00
HOXC13	0.642662	1.11457	4	CGTAGTAGCTGCCCCCGAAG;AGTGCTGGTAGCCTTCGACG;TCCGTATAGACGGCGCCCTG;CCGGGTATTTATCGCCCGGG	-0.49;0.24;0.69;2.13	37043;53270;63122;76618	5.66E-01;5.58E-01;3.97E-01;1.86E-02	824;14320;24172;40399	1.38E+00;8.66E-01;1.08E+00;1.13E+00
ANKRD23	0.642613	1.16132	4	CCTCCCACTCACCTTAACCA;CAAGTACTTGACAGACGGAG;CAAGTCTCGCGCGTCCACTG;GGATGACCAGATGTCCTCCG	0.1;0.37;0.74;1.36	50138;56345;63989;72737	9.45E-01;6.28E-01;4.07E-01;1.09E-01	4705;13453;21097;27304	6.96E-01;9.08E-01;1.23E+00;1.81E+00
ARL5AP4	0.640979	0.702467	1	TTGTTGGGCTGGATAATGCA	0.64	62078	0.096	15364	0.702
PCP2	0.639568	1.22546	4	CATGAGGCTGTCCATCTCGG;CCATCCGGTCGCCCTGCACG;CAGCGCTGTTCACTGCAAGC;TCACACGTTGGTCATCCATG	-0.41;0.81;1.06;1.1	38459;65276;69389;69888	5.96E-01;9.78E-01;5.24E-01;1.78E-01	7554;8053;12166;38983	5.42E-01;1.28E+00;1.88E+00;1.19E+00
CTSO	0.639437	1.25361	5	GCGCGCGCTCGGTACCCGGA;CTGATTTATTCCATAGAAGG;TGCCGTTAAGATTTGACTGG;TGCTTTGAACTGGTTAAACA;GCCGAGGCGGGCAGATCACG	-0.19;0.27;0.61;0.76;1.75	43115;54051;61380;64334;75411	9.69E-01;8.72E-01;6.69E-01;3.95E-01;5.77E-02	2031;13108;16062;23391;34327	9.28E-01;7.84E-01;1.25E+00;1.54E+00;1.77E+00
BMPR1B	0.63938	1.26821	5	TGATGGACCTATACACCACA;GATTGGAAAAGGTCGCTATG;TCTAACCCAATGCTGTATCG;CATTGATTTAGCGTCTAGGG;GCCGAGGCGGGCAGATCACG	-0.16;0.38;0.55;0.68;1.75	43832;56387;60197;62880;75411	9.98E-01;9.73E-01;6.33E-01;3.89E-01;5.77E-02	2031;14562;17245;21055;33610	9.28E-01;7.23E-01;1.18E+00;1.70E+00;1.81E+00
PRADC1	0.639177	1.42415	5	CAGCAACGGTTTCTTCATCC;CTGGCTCCCCGCGTGCGTCG;CGGGTGGTCCAGGAGCACGG;AGGCCTCTGGAGGTTCAGCG;GCCGAGGCGGGCAGATCACG	-1.04;-0.27;1.34;1.41;1.75	28678;41399;72635;73268;75411	5.36E-01;5.40E-01;1.50E+00;6.66E-01;5.77E-02	2031;4174;4807;36043;48764	9.28E-01;1.61E+00;2.68E+00;9.02E-01;1.00E+00
IL31RA	0.639176	1.12681	4	ACCAAACGTACAACCTCACG;ACGAACTGGACGATCCAGCA;TTTCCTATAGTAGTAGACAC;TTCACACGGAAAATCTTAGG	-0.21;0.09;1.07;1.6	42617;49932;69522;74628	6.99E-01;5.02E-01;5.29E-01;6.43E-02	2814;7920;27510;34825	8.86E-01;1.30E+00;9.37E-01;1.39E+00
CPXCR1	0.639069	1.13459	4	AGGGTGTCAGAATACCATGT;GATAGATCAAGATCCCACTC;TTGAGGAACAACATCTTCCT;TCTGTACTACAGTCATTAGG	-0.18;0.54;0.62;1.58	43238;59946;61593;74531	7.16E-01;7.36E-01;3.85E-01;6.65E-02	2911;15849;17496;34204	8.73E-01;7.99E-01;1.45E+00;1.42E+00
NRM	0.638944	1.13754	4	ATGGACATCCCGGTACTTTG;CGAGAAGGATGCTAAAGATG;AAAGCGCACGAACTCCACTC;GCTGCCCAACAAATAGAAGC	0.05;0.12;0.52;1.87	48971;50483;59477;75930	9.01E-01;5.10E-01;3.76E-01;3.42E-02	1512;17965;26959;28471	1.13E+00;7.20E-01;9.59E-01;1.74E+00
GLO1	0.638155	1.17776	4	CTTGGTACTGGGGTCCGCGT;GAGGGTCTGAATTGCCATTG;AAAAGATGAAAAAATAGCCT;GCAGACCATGCTACGAGTGA	-0.04;0.54;0.93;1.13	46365;60069;67367;70198	8.10E-01;7.41E-01;4.65E-01;1.71E-01	7244;10075;17373;31077	5.55E-01;1.11E+00;1.46E+00;1.59E+00
RNPEPL1	0.638071	1.28762	4	GGCCGCACCGTAGGTCTCGG;GAAAGTCATCAAAGCGCTGT;CCCCGTGCCCGCCTACCTCG;CTGTATGGGCCCTACATGTG	0.49;0.51;0.58;0.97	58943;59441;60824;67982	1.38E+00;7.19E-01;3.81E-01;2.26E-01	9460;16618;18001;18499	4.81E-01;7.68E-01;1.41E+00;2.49E+00
TTC39B	0.638037	1.17931	4	CTTGGGCTACAGTACCATTG;TGCCACCCAAAAACCAAGCA;TATCACATGATGCAAAGTGA;ACGTGAGTGCAGCTTTCTGT	0.11;0.23;1.04;1.17	50258;53080;69025;70776	9.50E-01;5.54E-01;5.12E-01;1.56E-01	6666;8417;24362;27184	5.80E-01;1.25E+00;1.07E+00;1.82E+00
DEFA5	0.63665	1.22175	4	TTCCTGGAGTGACTCAGCCT;TTCCTGCAAAGGAGATAGCA;TACAACCCAGAAGCAGTCTG;AGATTGATGTCTCCTACCTG	-0.83;0.5;1.42;1.46	31411;59157;73303;73655	4.68E-01;7.10E-01;7.42E-01;8.71E-02	3787;4139;18285;46031	7.74E-01;1.81E+00;1.40E+00;9.04E-01
KIAA1107	0.636339	1.23648	4	TCAGATGCAAGATTAATGAG;ATTTAGACTCAACAAGTGCA;GTGCTAAAACCCACCTACAG;TCTGGGCTTTATGTCATCGG	-0.53;0.9;1.0;1.18	36217;66889;68561;70844	5.49E-01;1.08E+00;4.97E-01;1.55E-01	6598;8881;10553;41225	5.84E-01;1.21E+00;2.06E+00;1.10E+00
PPFIA1	0.635605	1.37689	6	CAAGGCAGGCAGATCACCTG;TGTTTCAGCCGACCCCACTT;GCTGTGAGGGATCCTTCGTG;GTTGACCTGCTATCGCCCAG;AACCCAGGGGAAGTTACACG;GCCGAGGCGGGCAGATCACG	-0.53;0.14;0.55;0.83;1.08;1.75	36237;51055;60109;65696;69623;75411	9.22E-01;1.06E+00;9.79E-01;7.48E-01;4.49E-01;6.92E-02	2031;7819;11746;17333;26386;41205	8.61E-01;1.00E+00;1.37E+00;1.64E+00;1.74E+00;1.64E+00
MMRN1	0.635472	1.16963	4	AAGTTTGATACACACCAACC;GACTGTATCAAGTCTATCAG;GGAGATAGCTACAACTCCAG;CAAAATAGTTTCCATATCGG	-0.64;0.52;1.18;1.48	34347;59607;70886;73837	5.15E-01;7.25E-01;5.86E-01;8.28E-02	3605;6556;17834;43095	7.92E-01;1.44E+00;1.42E+00;1.02E+00
DISC1	0.634805	1.39553	6	CAAGGCAGGCAGATCACCTG;AGGACCCGCGATGTCTCTCT;CCTCGGCTCCATTCTCAGTG;ACTGCCTGCTGAGAAACCGG;GACCTCTGTGAGAGGAACCT;GCCGAGGCGGGCAGATCACG	-0.53;-0.42;0.62;0.85;1.55;1.75	36237;38323;61584;66101;74269;75411	9.22E-01;6.21E-01;1.06E+00;7.68E-01;7.00E-01;6.92E-02	2031;3173;11341;15858;39119;41205	8.61E-01;1.67E+00;1.41E+00;1.78E+00;1.01E+00;1.64E+00
TRDN	0.634264	1.5406	6	GGAATCTCACTCTGTCACCC;AAAACTGGTACGTGATGCTA;CACTAAATCAAACATAACGA;AGCTGACCACGTGATTATCA;CCCCCGGAAAAGTGCTGAAG;GCCGAGGCGGGCAGATCACG	-1.53;0.23;0.71;1.17;1.48;1.75	23634;52988;63497;70781;73772;75411	5.28E-01;1.16E+00;1.19E+00;1.11E+00;6.52E-01;6.92E-02	2031;3670;6661;13945;24454;53808	8.61E-01;1.56E+00;2.01E+00;1.97E+00;1.89E+00;9.49E-01
RCN1P1	0.633632	0.698471	1	GACCTTCGACCAGCTCACCC	0.63	61936	0.097	15506	0.698
KRT26	0.633416	1.13292	4	GTGGAGATGAATGCAACCCC;AGCATGCACATGGTCCAGGT;GCCTGGTTCAACGAGAGGGT;GCTTCTGCAATAGCGGTGGA	-0.26;-0.26;1.07;1.98	41517;41650;69468;76258	6.69E-01;4.31E-01;5.27E-01;2.67E-02	1184;7974;35792;35925	1.23E+00;1.29E+00;6.73E-01;1.33E+00
F12	0.633191	1.13729	4	TCATCGAAGACAGACTCTTG;TACCACAAATGTACCCACAA;ATGAAGCCTAGGGGACACCG;CTCGGCAGTCACGTTCCGGT	0.12;0.2;0.68;1.55	50371;52270;62791;74271	9.54E-01;5.39E-01;3.94E-01;7.26E-02	3171;14651;25172;27071	8.40E-01;8.50E-01;1.03E+00;1.83E+00
C7orf33	0.633133	1.17755	4	ACTTACCTTATGTCTTCCCG;GGGCTTCACATTCACATTGG;CCACACCAAAACATGAACCG;GTTTGGGTCCACGTTAGGGG	-0.52;0.79;0.81;1.45	36529;64995;65310;73572	5.56E-01;9.62E-01;4.25E-01;8.90E-02	3870;12132;12447;40913	7.66E-01;9.80E-01;1.86E+00;1.11E+00
ELANE	0.63291	1.17583	4	GGGACGCCGCCTGGGCAACG;CCGGCCCCCCACAATCTCCG;TGTCGTTGAGCAAGTTTACG;CCCCGGCAGAAACGTCCGCG	0.03;0.34;1.04;1.12	48408;55598;69104;70117	8.80E-01;6.09E-01;5.14E-01;1.73E-01	7325;8338;21844;29034	5.52E-01;1.26E+00;1.19E+00;1.70E+00
ZNF266	0.632487	1.11934	4	GAATTCGAAAGTGATCACTG;AAGGTGTGAATGATTAATGA;CAGATAGGAAGCCACAACGG;CTGTGCGTATACAAACTCAC	-0.49;-0.14;0.95;2.21	36976;44197;67669;76768	5.65E-01;4.44E-01;4.73E-01;1.52E-02	674;9773;33245;40466	1.47E+00;1.14E+00;7.43E-01;1.13E+00
SH3RF3	0.6324	1.2485	5	CGTGGGGGTAGATCCCGCCG;GCACAAGGGAGAGATGTACC;TCTGTGCGTCACACTGAGCG;CCTCCGACTACATTATTCCG;GCCGAGGCGGGCAGATCACG	-0.33;-0.24;0.59;1.39;1.75	40201;41970;60962;73095;75411	8.58E-01;5.49E-01;6.56E-01;6.52E-01;5.77E-02	2031;4347;16480;35472;37241	9.28E-01;1.58E+00;1.22E+00;9.23E-01;1.59E+00
HILPDA	0.632008	1.14466	4	TAGAGTGATGGAGTCCCTAG;CTCCATCTTCGTTAGAGTGA;TACTAGAGAGCCCATCGCCT;GAACCTCTACCTGTTAGGTG	-0.25;0.62;0.77;1.38	41767;61726;64642;72990	6.76E-01;8.04E-01;4.15E-01;1.03E-01	4452;12800;15716;35675	7.15E-01;9.42E-01;1.57E+00;1.35E+00
LOC102724660	0.632008	1.14466	4	TAGAGTGATGGAGTCCCTAG;CTCCATCTTCGTTAGAGTGA;TACTAGAGAGCCCATCGCCT;GAACCTCTACCTGTTAGGTG	-0.25;0.62;0.77;1.38	41767;61726;64642;72990	6.76E-01;8.04E-01;4.15E-01;1.03E-01	4452;12800;15716;35675	7.15E-01;9.42E-01;1.57E+00;1.35E+00
UGP2	0.630469	1.3264	5	GGAATCTCACTCTGTCACCC;GGGACACTCACTCAATATGA;AAACTTACCGAATCTTCAGG;AAGAATATACAGATCCACTG;ACAGCACACCAAAAAAGACC	-1.53;0.07;0.34;1.47;2.81	23634;49248;55503;73740;77267	4.49E-01;7.10E-01;5.29E-01;7.07E-01;4.88E-03	175;3702;21939;28194;53808	1.95E+00;1.70E+00;9.33E-01;1.25E+00;7.91E-01
PPP1R3B	0.629324	1.25129	5	ATGTTGAATGGCATATCTAG;TCACGGTCTTCTCAAATGCG;GTTCTCAAGGCAGACGTGGT;GGCAAACCTCTCTTGGCGCA;GCCGAGGCGGGCAGATCACG	-0.17;0.37;0.48;0.72;1.75	43571;56204;58780;63572;75411	9.87E-01;9.64E-01;5.95E-01;3.91E-01;5.77E-02	2031;13870;18662;21238;33871	9.28E-01;7.51E-01;1.09E+00;1.69E+00;1.80E+00
EEF1A2	0.627794	1.30757	5	GGACTGCGCAGTGCTGATCG;GGCCACCTCATCTACAAATG;CAAGAAGATCGGCTACAACC;GTCAGTGGAGATGCACCACG;GCCGAGGCGGGCAGATCACG	-0.9;0.54;0.78;0.97;1.75	30423;60089;64832;67997;75411	5.74E-01;1.17E+00;8.08E-01;4.41E-01;5.77E-02	2031;9445;12610;17353;47019	9.28E-01;9.97E-01;1.52E+00;2.01E+00;1.08E+00
ANKRD30A	0.626394	1.1548	4	ATAGAAACTTTCATTCTGCA;AAACCCATTTAGGCTAACTG;AAACATCTGAGAAATTTACG;CATAAAACTAAATACCTCGA	-0.42;0.72;0.78;1.42	38229;63724;64830;73361	5.91E-01;8.95E-01;4.18E-01;9.40E-02	4081;12612;13718;39213	7.47E-01;9.53E-01;1.74E+00;1.18E+00
FAM86GP	0.626174	0.694679	1	TGGCAACTTAGACAGCCCCA	0.63	61800	0.098	15642	0.695
ACOT2	0.625556	1.21423	4	CTACTTGCTCAGTCATCCCG;GGTACAGCCGGGACGCTCGA;AGATCATTAGGGTTCCTGCT;GCTCGCCAAGAGTGTCGGCG	0.29;0.45;0.76;1.01	54398;57967;64411;68625	1.13E+00;6.72E-01;4.12E-01;2.10E-01	8817;13031;19475;23044	4.99E-01;9.30E-01;1.32E+00;2.11E+00
CPSF6	0.625259	1.19198	4	ATATATTGGAAATCTAACAT;TCCCGTGCAGCATTTCCACA;CTAGCTGGGCCTCCTAATCG;GGGCAAATGGCCAGTCAAAG	-0.77;0.77;1.0;1.5	32365;64666;68422;73977	4.82E-01;9.44E-01;4.93E-01;7.95E-02	3465;9020;12776;45077	8.07E-01;1.20E+00;1.82E+00;9.40E-01
RTN2	0.623796	1.23773	4	CACAGCCCGGGAATTCTCAG;CAGAGTTCGAATCTCGCGAT;CCCACTTCAGTAGAACCCGG;GGACCAATTAGAATTCACGG	-1.01;0.74;1.25;1.52	29017;64064;71703;74080	4.36E-01;9.12E-01;6.28E-01;7.71E-02	3362;5739;13378;48425	8.18E-01;1.55E+00;1.77E+00;8.16E-01
RND2	0.623644	1.14098	4	TTGGCTGTAAACTGGACATG;GCCGCATTGAGCTCAACATG;CCACCTGCTCATGTGTAACA;TCAGAATCAGGATAGGCCAG	-0.52;0.12;1.29;1.61	36398;50403;72129;74692	5.53E-01;5.09E-01;6.54E-01;6.28E-02	2750;5313;27039;41044	8.95E-01;1.61E+00;9.55E-01;1.10E+00
XG	0.623526	1.47111	5	GGAATCTCACTCTGTCACCC;CACATCATTGAAGTAACCTG;GCTCGGCACCTACCTGCAGG;CAGCCCGAGAATCCCGACAG;TGGCTTTGGGTAGATATCTG	-1.53;0.39;1.23;1.43;1.6	23634;56692;71453;73379;74629	4.49E-01;9.87E-01;1.33E+00;6.75E-01;8.03E-02	2813;4063;5989;20750;53808	8.05E-01;1.63E+00;2.40E+00;1.72E+00;7.91E-01
MMP25	0.622606	1.60884	4	TGGGGAGCACCCCATCTCCG;AAGTCATGCAGAGGTTCGCG;AATCCACCTCATGAAATGTG;CGTCGCCGGTACGCTCTGAG	-2.07;1.34;1.45;1.77	19087;72610;73576;75506	3.75E-01;1.69E+00;7.66E-01;4.40E-02	1936;3866;4831;58355	1.03E+00;1.87E+00;3.04E+00;4.92E-01
SLC25A41	0.621547	1.19701	4	AGACGCGGTTGACCTTGCGT;AGTCCTGGAAGTGGATAACA;CATACACGTGTGTACAGCCA;GAGAACTTGATGGCATACTC	-0.13;0.77;0.8;1.04	44325;64699;65145;69117	7.47E-01;9.45E-01;4.22E-01;1.98E-01	8325;12297;12743;33116	5.15E-01;9.70E-01;1.83E+00;1.48E+00
GRM2	0.621338	1.19165	4	CCAGCCCTATGAGTACCGAT;TGGGCGCTATCGCTACCAGA;GTCGCCCTCAGACGCCACAG;GGGTCGCATAAGAGCCGTCG	0.19;0.38;0.91;1.01	52013;56592;67009;68639	1.02E+00;6.34E-01;4.57E-01;2.10E-01	8803;10433;20850;25429	4.99E-01;1.09E+00;1.24E+00;1.93E+00
CCR4	0.620909	1.17911	4	AAAACAGCATGATCCCTAAG;AAAAACCAAGGAATACAGTG;ATACCTGGCAATTGTGCACG;ACTCTCTCAACTCCACGACG	-0.44;0.66;1.12;1.15	37930;62386;70098;70489	5.85E-01;8.32E-01;5.51E-01;1.63E-01	6953;7344;15056;39512	5.67E-01;1.35E+00;1.63E+00;1.17E+00
PRKCE	0.620534	1.23189	5	ATGTGATCATCGATCTCTCA;CCACGTTGGTCTCACATCGA;GCACCGCTTGTGGACCACGC;GCCTTGTCATTTGACAACCG;GCCGAGGCGGGCAGATCACG	-0.43;-0.21;0.68;1.31;1.75	38108;42729;62957;72283;75411	7.86E-01;5.62E-01;7.26E-01;5.97E-01;5.77E-02	2031;5159;14485;34713;39334	9.28E-01;1.44E+00;1.36E+00;9.53E-01;1.47E+00
ALK	0.620235	1.38314	6	CAAGGCAGGCAGATCACCTG;CTCTATTGCAGTTAGCGGAG;TCCAGACAACCCATTTCGAG;CTGTAGCACTTTCAGAAGCG;GCCGAGGCGGGCAGATCACG;CCATACCTTAAATACGTAGG	-0.53;-0.47;0.56;0.62;1.75;1.79	36237;37353;60489;61697;75411;75637	9.22E-01;6.01E-01;1.00E+00;6.02E-01;8.61E-01;6.14E-02	1805;2031;15745;16953;40089;41205	9.06E-01;2.03E+00;1.07E+00;1.68E+00;9.68E-01;1.64E+00
IFNAR2	0.619492	1.11228	4	TGAAAGTGATAGCGATACTG;CGTCATTGAAGAACAGTCAG;TGAGTGGAGAAGCACACACG;ATATCCATGGCTTCCAACGG	-0.38;-0.04;1.15;1.74	39189;46416;70526;75394	6.13E-01;4.61E-01;5.69E-01;4.65E-02	2048;6916;31026;38253	1.01E+00;1.40E+00;8.12E-01;1.23E+00
GPR31	0.61949	1.12933	4	GTAGAAACTGTGGCACCTGG;GGTTGACCTTAAGCCGAGGG;GCTTGGCATCTGGGCCGTGT;CTGCATTGCAGAACACGATG	0.09;0.27;0.71;1.42	49857;53871;63412;73278	9.34E-01;5.70E-01;4.00E-01;9.60E-02	4164;14030;23571;27585	7.39E-01;8.79E-01;1.11E+00;1.79E+00
SLC10A7	0.618781	1.43075	5	TCGCCCAAGCTAGAGTGCAG;CTTACCTGTCCAATGATGAG;CTGCTGATAGCACCAAAAGG;CAATCACACCCATCAACGAA;CCGTCCATAGGGGTGAATGG	-1.41;0.76;0.76;1.37;1.6	24742;64439;64488;72894;74647	4.65E-01;1.48E+00;7.92E-01;6.37E-01;7.98E-02	2795;4548;12954;13003;52705	8.07E-01;1.54E+00;1.49E+00;2.48E+00;8.36E-01
TLR5	0.618648	1.09595	4	GACACCTGGATCTTTCACAT;TACCCCCTTGACTATTGACA;TTTGTCATATAACCTTCTGG;TATACAAGCTATTAGCTGCG	-0.28;-0.02;0.98;1.8	41064;46905;68140;75673	6.58E-01;4.66E-01;4.85E-01;4.01E-02	1769;9302;30537;36378	1.07E+00;1.17E+00;8.28E-01;1.31E+00
ZNF282	0.618552	1.20855	4	TCTCCGTCCATTGAGTCGCG;CTTGTCCCGGATTAAACAGG;CAGGGAAGAACCTTGTGTGT;CGACTGTGAAAAGACGGCCG	0.0;0.7;0.84;0.94	47379;63332;65792;67500	8.44E-01;8.75E-01;4.33E-01;2.39E-01	9942;11650;14110;29899	4.68E-01;1.01E+00;1.70E+00;1.65E+00
ATOX1	0.618253	1.15405	4	TCAATGCAGACCTTCTTGTT;TCTCGGGTCCTCAATAAGCT;TTCTCTGTGGACATGACCTG;TCAGAAGCACGAGTTCTCTG	-0.28;0.0;1.37;1.38	41254;47653;72886;72927	6.63E-01;4.73E-01;7.07E-01;1.04E-01	4515;4556;29931;36188	7.11E-01;1.74E+00;8.49E-01;1.32E+00
HES5	0.617768	1.22101	4	CGGCGCATCTTCTCCACCAC;TGCTGGAGCAGGAGTTCGCG;ACTACAGCGAAGGCTACTCG;AGCTACCTGAAGCACAGCAA	-1.38;0.59;0.62;2.64	25018;60976;61607;77189	3.97E-01;7.74E-01;3.85E-01;5.66E-03	253;15835;16466;52424	1.89E+00;7.99E-01;1.52E+00;6.78E-01
TET2-AS1	0.617613	1.24891	5	CAAGGCAGGCAGATCACCTG;GTTCCAAAAACCCTCACACC;TGGAGAAAGACGTAACTTCG;GATTCCGCTTGGTGAAAACG;TCTGCCCTGAGGTATGCGAT	-0.53;0.14;0.89;0.94;1.65	36237;50978;66767;67588;74933	7.27E-01;7.62E-01;9.15E-01;4.33E-01;7.15E-02	2509;9854;10675;26464;41205	8.48E-01;9.68E-01;1.71E+00;1.35E+00;1.37E+00
TET2	0.617613	1.24891	5	CAAGGCAGGCAGATCACCTG;GTTCCAAAAACCCTCACACC;TGGAGAAAGACGTAACTTCG;GATTCCGCTTGGTGAAAACG;TCTGCCCTGAGGTATGCGAT	-0.53;0.14;0.89;0.94;1.65	36237;50978;66767;67588;74933	7.27E-01;7.62E-01;9.15E-01;4.33E-01;7.15E-02	2509;9854;10675;26464;41205	8.48E-01;9.68E-01;1.71E+00;1.35E+00;1.37E+00
MAPK3	0.617594	1.22411	4	TTCCGCCATGAGAATGTCAT;AGTAGGTCTGATGTTCGAAG;TGGAGGGCTTTAGATCTCGG;GCAGTTGCAGTACATCGGCG	0.22;0.6;0.74;0.91	52849;61201;64008;67123	1.06E+00;7.83E-01;4.07E-01;2.48E-01	10319;13434;16241;24593	4.60E-01;9.09E-01;1.54E+00;1.99E+00
LOC105371084	0.616662	1.00107	3	CAAGGCAGGCAGATCACCTG;AATGTCTCCAGAAGAATCAT;AATCCCAAAACCTAAGTCTG	-0.53;0.82;1.57	36237;65417;74428	4.01E-01;4.78E-01;5.17E-02	3014;12025;41205	9.67E-01;1.21E+00;8.22E-01
BNIPL	0.616642	1.53244	5	AAGAAAGTCCTGTCTCATGG;TTGCGGCTGAGTCTGACTAA;GATGAACTACCCCGGGCAGA;GAGAAGATGGACATCACTGG;GCCGAGGCGGGCAGATCACG	-1.94;0.59;0.96;1.71;1.75	20158;61081;67930;75235;75411	4.09E-01;1.23E+00;9.92E-01;8.97E-01;5.77E-02	2031;2207;9512;16361;57284	9.28E-01;2.13E+00;1.85E+00;2.10E+00;6.55E-01
HCRT	0.615586	1.09229	4	CGCCCCGGACGACAACAGCG;GCATCCTCACGCTGGGCAAG;CAGCAGCAGTAGCGTCACGG;GCACGGCGCGGGCAATCACG	-0.19;-0.12;0.7;2.08	42997;44473;63194;76528	7.09E-01;4.45E-01;3.98E-01;2.06E-02	914;14248;32969;34445	1.34E+00;8.69E-01;7.51E-01;1.41E+00
PCDHB16	0.615306	1.08326	4	TCCGCCGTCTAAATCCCTGG;AGGCCAGGATCATTTCCCAG;CTTTATCCAACACTAGCTCA;CGTGAATGACAATCCCCCAC	-0.41;0.21;0.67;1.98	38604;52579;62785;76270	5.99E-01;5.45E-01;3.94E-01;2.65E-02	1172;14657;24863;38838	1.24E+00;8.50E-01;1.05E+00;1.20E+00
FAM167A	0.615286	1.28024	4	AGCTATAGCCTGGCTCAGGA;GAGGTGGTCATCGGGTGGTG;CCAGCCTCAGTTTCTCGGTG;AAAGCCTTCCAGCTTGCCAG	0.46;0.55;0.63;0.83	58221;60163;61799;65675	1.34E+00;7.44E-01;3.87E-01;2.86E-01	11767;15643;17279;19221	4.31E-01;8.07E-01;1.46E+00;2.42E+00
CACNG5	0.615067	1.29097	4	AAGGCCAGTATCGTCCGGTG;CTTACTTAGAACATTGACCG;CCCACCACGAGAGAGAGGCC;TGCTGACCGCGATACCCAGG	-0.97;1.04;1.1;1.29	29601;69001;69956;72089	4.43E-01;1.25E+00;5.45E-01;1.24E-01	5353;7486;8441;47841	6.52E-01;1.34E+00;2.34E+00;8.37E-01
IL21R	0.614915	1.11098	4	GGGGCATGAAGAACCGCTCA;GAGCTGCAGTACAGGAACCG;GTTGACACTGAAAATGTCGT;CTACACCGATTACCTCCAGA	-0.08;0.42;0.71;1.41	45444;57441;63450;73237	7.81E-01;6.57E-01;4.01E-01;9.70E-02	4205;13992;20001;31998	7.36E-01;8.81E-01;1.29E+00;1.54E+00
GPR42	0.614288	1.01152	3	GGCCGGGTCTTGTACCACAG;TGATCAGCGGGACCACAAAG;TCTACGTCATAGAATTCTCA	0.27;0.39;1.17	54081;56819;70782	7.20E-01;3.66E-01;1.17E-01	6660;20623;23361	6.66E-01;8.07E-01;1.56E+00
USF2	0.613902	1.19096	4	TTCCGCACAGAGACAAATGG;AGCCGTAGTATCTCCCACAC;CCTGCACATACGGAGAGTAA;CCACGACAAGGGACCCGAGG	-0.82;0.84;0.86;1.57	31573;65951;66296;74431	4.70E-01;1.02E+00;4.42E-01;6.89E-02	3011;11146;11491;45869	8.60E-01;1.04E+00;1.95E+00;9.10E-01
LOC100420848	0.613425	0.686564	1	ATTCTGACAGCTGAACACGA	0.61	61505	0.1	15937	0.687
OR5D14	0.613369	1.08754	4	CAATCCTCTGCTTTATACAG;GCTCATGTATGTTATCACAG;AACAAAAATCAACAAAAGAG;TTAACCGGAGAGCATAACAA	-0.16;0.15;0.82;1.64	43713;51152;65575;74899	7.29E-01;5.20E-01;4.29E-01;5.80E-02	2543;11867;26290;33729	9.25E-01;9.96E-01;9.86E-01;1.44E+00
RHBDL2	0.61324	1.39947	6	GGTACACCAGCCCCACACGG;CAAGGCAGGCAGATCACCTG;TCAGAAACAGTGGATCACGT;GCAGAGTTCAGCACATCTTG;GCCGAGGCGGGCAGATCACG;GCTCCCACAAGATATCTGAG	-1.39;-0.53;0.36;0.8;1.75;2.7	24915;36237;55936;65170;75411;77222	5.57E-01;5.80E-01;7.92E-01;7.24E-01;8.61E-01;7.38E-03	220;2031;12272;21506;41205;52527	1.77E+00;2.03E+00;1.32E+00;1.33E+00;9.22E-01;1.01E+00
EIF4ENIF1	0.61285	1.61584	5	TCAGGTATAGTAGAGTGCAA;TGGGCGAAGGTAGTCAGCTG;TGAGCGCCGGGAGCTAACAG;GCCGAGGCGGGCAGATCACG;GAACCACCTACTGAACCGAC	-2.19;0.71;1.05;1.75;1.75	18002;63466;69169;75411;75436	3.94E-01;1.40E+00;1.09E+00;9.29E-01;5.70E-02	2006;2031;8273;13976;59439	9.33E-01;2.20E+00;2.01E+00;2.36E+00;5.75E-01
ELAVL2	0.61275	1.78955	5	TGTGAACTACATTGACCCCA;GTTTGGAGACTGGTACAGCT;TCTACCATAGGCATATCAAG;GTTCGTCACCAGTTGACTCT;GCCGAGGCGGGCAGATCACG	-2.42;1.2;1.23;1.3;1.75	15884;71060;71480;72233;75411	3.88E-01;2.33E+00;1.33E+00;5.94E-01;5.77E-02	2031;5209;5962;6382;61547	9.28E-01;1.44E+00;2.41E+00;3.67E+00;4.99E-01
DNALI1	0.612468	1.17642	4	TCACCATCAACTGTGCGGAG;GTCTGCGGGCGGAATCATGG;ACTGTGAGTAGAGTTCCCTG;GGTAGGCAGCGATGGTCATG	-0.89;0.56;1.23;1.56	30674;60318;71403;74340	4.57E-01;7.50E-01;6.12E-01;7.10E-02	3102;6039;17124;46768	8.49E-01;1.51E+00;1.47E+00;8.76E-01
PCDHB4	0.612187	1.12625	4	TCTCACTCGAAATCATAGTG;GAAGATATGATAAGTTCTGG;ACTTGGAAATGCAGTACACA;TAACAATTGGAGAGTCTAGG	0.0;0.36;0.86;1.23	47587;56010;66277;71410	8.51E-01;6.19E-01;4.42E-01;1.41E-01	6032;11165;21432;30108	6.12E-01;1.04E+00;1.21E+00;1.64E+00
CXorf66	0.612069	1.14673	4	ATGACTACAAACCAAACCAA;TTCCTGTGGACCGAATGGCT;AGTGGCTTGAATAGCTGAGG;TTGTCTGCAGTAGATAGCAT	-0.54;0.24;1.34;1.41	36149;53288;72589;73194	5.48E-01;5.59E-01;6.85E-01;9.80E-02	4248;4853;24154;41293	7.32E-01;1.68E+00;1.08E+00;1.09E+00
SEC1P	0.611561	1.60541	8	TGTAGCTCCACCAGTCCTCG;GCCACCGACTCAGTGAACTG;CCAGTGCTGAGCCTTAATGG;CCGCCAGGGCCAGTCTCGAT;GCAGCTCATTCACTTCAACC;GCAGTGCACCTGCAAGTTAG;CCTGGCCCCCAAACTCCACA;GAGCTGTTCAGACTGTCGGG	-0.63;-0.32;-0.04;0.25;1.19;1.26;1.48;1.7	34622;40415;46531;53455;70936;71783;73824;75166	1.25E+00;1.04E+00;9.10E-01;8.35E-01;1.67E+00;1.02E+00;5.73E-01;1.04E-01	2276;3618;5659;6506;23987;30911;37027;42820	7.19E-01;1.34E+00;1.83E+00;2.61E+00;1.28E+00;1.39E+00;1.62E+00;2.06E+00
DCSTAMP	0.611015	1.14846	4	TTTCATACTTCCAACCACAA;GTTTCTGCCATCAATCATAG;CCAGATGGCAACAACCACAG;TGTGCTCCCGCTGAATAAGG	-0.17;0.47;1.05;1.09	43523;58479;69229;69782	7.24E-01;6.88E-01;5.18E-01;1.81E-01	7660;8213;18963;33919	5.38E-01;1.27E+00;1.35E+00;1.43E+00
CDHR4	0.61088	1.27579	5	CTGAACCACCTCACTACCGG;ATTGAGTACTACACCTCTGG;AGGAGTGTCACAGTCCAGTG;GCCGAGGCGGGCAGATCACG;GTGCAGCTGAAGTTCACATG	-0.53;-0.34;0.43;1.75;1.75	36251;39890;57651;75411;75421	7.27E-01;5.19E-01;5.70E-01;9.29E-01;5.74E-02	2021;2031;19791;37552;41191	9.30E-01;2.20E+00;1.03E+00;8.47E-01;1.37E+00
TRMT2B	0.61029	1.80934	10	CAAGGCAGGCAGATCACCTG;TCCACCTTCTCTGTGAACCG;CAGTCCGCACCAATAGCCAA;GCTCCAATGGAGACTGTCGA;GGACAACAGAAGAGACACGA;GGTGGATTTCTGGCATACCA;ATGGCCAAACTACTATGCAC;TGACACTTACTACTCGGCAT;TCTGCTGTCCGATAAAAGAG;GCCGAGGCGGGCAGATCACG	-0.53;-0.52;-0.12;0.31;0.47;0.65;1.34;1.35;1.4;1.75	36237;36553;44526;54927;58491;62303;72590;72724;73137;75411	1.80E+00;1.22E+00;1.24E+00;1.49E+00;1.26E+00;1.08E+00;1.73E+00;9.96E-01;4.79E-01;1.15E-01	2031;4305;4718;4852;15139;18950;22515;32916;40889;41205	6.85E-01;1.06E+00;1.76E+00;2.66E+00;1.62E+00;1.83E+00;2.12E+00;1.80E+00;1.82E+00;2.74E+00
LRRD1	0.610151	1.19044	4	AGAGTTTATCATCACTAACT;TACAGCATAAAATAAGTACG;TAACTTTACAGTTAACCTTG;TTACTGAAAGATATATCCAC	0.14;0.61;0.63;1.05	51100;61522;61910;69204	9.84E-01;7.96E-01;3.87E-01;1.95E-01	8238;15532;15920;26342	5.18E-01;8.12E-01;1.56E+00;1.87E+00
CYP51A1-AS1	0.610151	1.19044	4	AGAGTTTATCATCACTAACT;TACAGCATAAAATAAGTACG;TAACTTTACAGTTAACCTTG;TTACTGAAAGATATATCCAC	0.14;0.61;0.63;1.05	51100;61522;61910;69204	9.84E-01;7.96E-01;3.87E-01;1.95E-01	8238;15532;15920;26342	5.18E-01;8.12E-01;1.56E+00;1.87E+00
CETN2	0.609808	1.12899	4	GCTTACTGAAGAGCAAAAGC;ATAAGTGAAATTGATAAGGA;AACTGTGATGACCCAGAAAA;CATAGATGTTAAAGAACTGA	0.08;0.39;0.61;1.36	49520;56804;61398;72757	9.21E-01;6.40E-01;3.84E-01;1.08E-01	4685;16044;20638;27922	6.97E-01;7.91E-01;1.26E+00;1.77E+00
FLOT1	0.609805	1.49802	6	TGGCCATCTCGATCTCACTC;CAAGGCAGGCAGATCACCTG;AAAGGTTTACACTCGCCATG;AGGACTATTTGCACTCTTTG;GCCGAGGCGGGCAGATCACG;AGACGTTAGAGGGCCACCAG	-1.66;-0.53;-0.16;1.33;1.75;2.94	22539;36237;43623;72506;75411;77313	5.05E-01;5.80E-01;5.26E-01;1.33E+00;8.61E-01;4.31E-03	129;2031;4936;33819;41205;54903	2.00E+00;2.03E+00;2.37E+00;7.62E-01;9.22E-01;8.96E-01
NO_CURRENT_57	0.609748	1.18757	4	ATGCTGCAGCTTTACGATCA;ATGGAAGAGCGTCATGACTT;ATGTAACGAGTTGTAAGTCA;ATGCGCTTTAATCGCCGTTC	0.01;0.65;0.8;0.98	47996;62260;65144;68117	8.66E-01;8.27E-01;4.22E-01;2.23E-01	9325;12298;15182;29446	4.84E-01;9.70E-01;1.62E+00;1.68E+00
TRY7	0.608958	0.683685	1	GATGATGACAAGATTGTTGG	0.61	61399	0.101	16043	0.684
APOBR	0.608814	1.20534	4	GAAGCCAGGACAATCTCAGG;GGGGCTTGCCAAGACAGGAG;ATGACAGAAGACATGAAGTG;CACCCCATTCCACGCCCAGT	0.32;0.5;0.51;1.1	55209;59106;59372;69938	1.17E+00;7.08E-01;3.76E-01;1.77E-01	7504;18070;18336;22233	5.44E-01;7.17E-01;1.39E+00;2.17E+00
PELI2	0.60877	1.13732	4	TCCACGAGGGGGCTTCACCG;TTTGGAAGAGTCAAATCCGG;GGGCGTGGATATCACATGGA;TGTACACCTTGCGAGAAACC	-0.89;0.38;1.08;1.86	30606;56457;69680;75910	4.56E-01;6.31E-01;5.35E-01;3.47E-02	1532;7762;20985;46836	1.13E+00;1.31E+00;1.24E+00;8.74E-01
PPM1B	0.608213	1.24379	5	TTACAAGTGTGTTGATGGCA;CATATCTACTTTATCAACTG;TGGTCATGCTGGATCCCGAG;ATATGTTAAATCTAGGCTTG;GCCGAGGCGGGCAGATCACG	-0.43;-0.4;0.68;1.44;1.75	38141;38790;62942;73458;75411	7.87E-01;5.06E-01;7.25E-01;6.81E-01;5.77E-02	2031;3984;14500;38652;39301	9.28E-01;1.65E+00;1.36E+00;8.08E-01;1.47E+00
ABCA8	0.607528	1.11107	4	GCAAATCTGCGCAATTGCAA;AAATTATCAGCCAAAAGCGA;CTGTTAATGTCACAAGAGAG;GACACCCCCAAAAGACAGTG	-0.12;-0.11;1.12;1.54	44616;44725;70152;74219	7.56E-01;4.47E-01;5.53E-01;7.38E-02	3223;7290;32717;32826	8.34E-01;1.36E+00;7.59E-01;1.49E+00
SAMHD1	0.607432	1.22197	5	GGTGTAAAGAGTTGCGAGTG;GGATGTCTAGTTCACGCACT;CTTCGATACATCAAACAGCT;TCCATCCCGACTACAAGACA;GCCGAGGCGGGCAGATCACG	-0.11;0.25;0.47;0.67;1.75	44876;53580;58444;62776;75411	1.04E+00;8.54E-01;5.87E-01;3.88E-01;5.77E-02	2031;14665;18998;23862;32566	9.28E-01;7.19E-01;1.08E+00;1.51E+00;1.88E+00
LINC01090	0.606905	0.919907	2	CAAGGCAGGCAGATCACCTG;GCCGAGGCGGGCAGATCACG	-0.53;1.75	36237;75411	3.03E-01;2.31E-02	2031;41205	1.29E+00;5.48E-01
LINC01098	0.606905	0.919907	2	CAAGGCAGGCAGATCACCTG;GCCGAGGCGGGCAGATCACG	-0.53;1.75	36237;75411	3.03E-01;2.31E-02	2031;41205	1.29E+00;5.48E-01
LOC105374838	0.606905	0.919907	2	CAAGGCAGGCAGATCACCTG;GCCGAGGCGGGCAGATCACG	-0.53;1.75	36237;75411	3.03E-01;2.31E-02	2031;41205	1.29E+00;5.48E-01
LINC02198	0.606905	0.919907	2	CAAGGCAGGCAGATCACCTG;GCCGAGGCGGGCAGATCACG	-0.53;1.75	36237;75411	3.03E-01;2.31E-02	2031;41205	1.29E+00;5.48E-01
LOC105373903	0.606905	0.919907	2	CAAGGCAGGCAGATCACCTG;GCCGAGGCGGGCAGATCACG	-0.53;1.75	36237;75411	3.03E-01;2.31E-02	2031;41205	1.29E+00;5.48E-01
LINC01322	0.606905	0.919907	2	CAAGGCAGGCAGATCACCTG;GCCGAGGCGGGCAGATCACG	-0.53;1.75	36237;75411	3.03E-01;2.31E-02	2031;41205	1.29E+00;5.48E-01
MYO15B	0.606905	0.919907	2	CAAGGCAGGCAGATCACCTG;GCCGAGGCGGGCAGATCACG	-0.53;1.75	36237;75411	3.03E-01;2.31E-02	2031;41205	1.29E+00;5.48E-01
LINC01258	0.606905	0.919907	2	CAAGGCAGGCAGATCACCTG;GCCGAGGCGGGCAGATCACG	-0.53;1.75	36237;75411	3.03E-01;2.31E-02	2031;41205	1.29E+00;5.48E-01
LINC01599	0.606905	0.919907	2	CAAGGCAGGCAGATCACCTG;GCCGAGGCGGGCAGATCACG	-0.53;1.75	36237;75411	3.03E-01;2.31E-02	2031;41205	1.29E+00;5.48E-01
LOC107987083	0.606905	0.919907	2	CAAGGCAGGCAGATCACCTG;GCCGAGGCGGGCAGATCACG	-0.53;1.75	36237;75411	3.03E-01;2.31E-02	2031;41205	1.29E+00;5.48E-01
LOC105370770	0.606905	0.919907	2	CAAGGCAGGCAGATCACCTG;GCCGAGGCGGGCAGATCACG	-0.53;1.75	36237;75411	3.03E-01;2.31E-02	2031;41205	1.29E+00;5.48E-01
LOC101928570	0.606905	0.919907	2	CAAGGCAGGCAGATCACCTG;GCCGAGGCGGGCAGATCACG	-0.53;1.75	36237;75411	3.03E-01;2.31E-02	2031;41205	1.29E+00;5.48E-01
RIMS3	0.606905	0.919907	2	CAAGGCAGGCAGATCACCTG;GCCGAGGCGGGCAGATCACG	-0.53;1.75	36237;75411	3.03E-01;2.31E-02	2031;41205	1.29E+00;5.48E-01
JPX	0.606905	0.919907	2	CAAGGCAGGCAGATCACCTG;GCCGAGGCGGGCAGATCACG	-0.53;1.75	36237;75411	3.03E-01;2.31E-02	2031;41205	1.29E+00;5.48E-01
STK32A-AS1	0.606905	0.919907	2	CAAGGCAGGCAGATCACCTG;GCCGAGGCGGGCAGATCACG	-0.53;1.75	36237;75411	3.03E-01;2.31E-02	2031;41205	1.29E+00;5.48E-01
LOC105376253	0.606905	0.919907	2	CAAGGCAGGCAGATCACCTG;GCCGAGGCGGGCAGATCACG	-0.53;1.75	36237;75411	3.03E-01;2.31E-02	2031;41205	1.29E+00;5.48E-01
LOC105370063	0.606905	0.919907	2	CAAGGCAGGCAGATCACCTG;GCCGAGGCGGGCAGATCACG	-0.53;1.75	36237;75411	3.03E-01;2.31E-02	2031;41205	1.29E+00;5.48E-01
LINC01170	0.606905	0.919907	2	CAAGGCAGGCAGATCACCTG;GCCGAGGCGGGCAGATCACG	-0.53;1.75	36237;75411	3.03E-01;2.31E-02	2031;41205	1.29E+00;5.48E-01
LOC102723406	0.606905	0.919907	2	CAAGGCAGGCAGATCACCTG;GCCGAGGCGGGCAGATCACG	-0.53;1.75	36237;75411	3.03E-01;2.31E-02	2031;41205	1.29E+00;5.48E-01
SRP54-AS1	0.606905	0.919907	2	CAAGGCAGGCAGATCACCTG;GCCGAGGCGGGCAGATCACG	-0.53;1.75	36237;75411	3.03E-01;2.31E-02	2031;41205	1.29E+00;5.48E-01
LOC105373032	0.606905	0.919907	2	CAAGGCAGGCAGATCACCTG;GCCGAGGCGGGCAGATCACG	-0.53;1.75	36237;75411	3.03E-01;2.31E-02	2031;41205	1.29E+00;5.48E-01
LOC107985714	0.606905	0.919907	2	CAAGGCAGGCAGATCACCTG;GCCGAGGCGGGCAGATCACG	-0.53;1.75	36237;75411	3.03E-01;2.31E-02	2031;41205	1.29E+00;5.48E-01
LINC00674	0.606905	0.919907	2	CAAGGCAGGCAGATCACCTG;GCCGAGGCGGGCAGATCACG	-0.53;1.75	36237;75411	3.03E-01;2.31E-02	2031;41205	1.29E+00;5.48E-01
LOC107984116	0.606905	0.919907	2	CAAGGCAGGCAGATCACCTG;GCCGAGGCGGGCAGATCACG	-0.53;1.75	36237;75411	3.03E-01;2.31E-02	2031;41205	1.29E+00;5.48E-01
PROS2P	0.606905	0.919907	2	CAAGGCAGGCAGATCACCTG;GCCGAGGCGGGCAGATCACG	-0.53;1.75	36237;75411	3.03E-01;2.31E-02	2031;41205	1.29E+00;5.48E-01
LINC01185	0.606905	0.919907	2	CAAGGCAGGCAGATCACCTG;GCCGAGGCGGGCAGATCACG	-0.53;1.75	36237;75411	3.03E-01;2.31E-02	2031;41205	1.29E+00;5.48E-01
TARID	0.606905	0.919907	2	CAAGGCAGGCAGATCACCTG;GCCGAGGCGGGCAGATCACG	-0.53;1.75	36237;75411	3.03E-01;2.31E-02	2031;41205	1.29E+00;5.48E-01
LOC105375760	0.606905	0.919907	2	CAAGGCAGGCAGATCACCTG;GCCGAGGCGGGCAGATCACG	-0.53;1.75	36237;75411	3.03E-01;2.31E-02	2031;41205	1.29E+00;5.48E-01
LINC02315	0.606905	0.919907	2	CAAGGCAGGCAGATCACCTG;GCCGAGGCGGGCAGATCACG	-0.53;1.75	36237;75411	3.03E-01;2.31E-02	2031;41205	1.29E+00;5.48E-01
OVOS2	0.606905	0.919907	2	CAAGGCAGGCAGATCACCTG;GCCGAGGCGGGCAGATCACG	-0.53;1.75	36237;75411	3.03E-01;2.31E-02	2031;41205	1.29E+00;5.48E-01
LOC100507156	0.606905	0.919907	2	CAAGGCAGGCAGATCACCTG;GCCGAGGCGGGCAGATCACG	-0.53;1.75	36237;75411	3.03E-01;2.31E-02	2031;41205	1.29E+00;5.48E-01
LOC100420587	0.606905	0.919907	2	CAAGGCAGGCAGATCACCTG;GCCGAGGCGGGCAGATCACG	-0.53;1.75	36237;75411	3.03E-01;2.31E-02	2031;41205	1.29E+00;5.48E-01
LOC107984285	0.606905	0.919907	2	CAAGGCAGGCAGATCACCTG;GCCGAGGCGGGCAGATCACG	-0.53;1.75	36237;75411	3.03E-01;2.31E-02	2031;41205	1.29E+00;5.48E-01
LOC107984378	0.606905	0.919907	2	CAAGGCAGGCAGATCACCTG;GCCGAGGCGGGCAGATCACG	-0.53;1.75	36237;75411	3.03E-01;2.31E-02	2031;41205	1.29E+00;5.48E-01
LOC643542	0.606905	0.919907	2	CAAGGCAGGCAGATCACCTG;GCCGAGGCGGGCAGATCACG	-0.53;1.75	36237;75411	3.03E-01;2.31E-02	2031;41205	1.29E+00;5.48E-01
LOC105369803	0.606905	0.919907	2	CAAGGCAGGCAGATCACCTG;GCCGAGGCGGGCAGATCACG	-0.53;1.75	36237;75411	3.03E-01;2.31E-02	2031;41205	1.29E+00;5.48E-01
LOC105369804	0.606905	0.919907	2	CAAGGCAGGCAGATCACCTG;GCCGAGGCGGGCAGATCACG	-0.53;1.75	36237;75411	3.03E-01;2.31E-02	2031;41205	1.29E+00;5.48E-01
LINC00673	0.606905	0.919907	2	CAAGGCAGGCAGATCACCTG;GCCGAGGCGGGCAGATCACG	-0.53;1.75	36237;75411	3.03E-01;2.31E-02	2031;41205	1.29E+00;5.48E-01
LOC105377703	0.606905	0.919907	2	CAAGGCAGGCAGATCACCTG;GCCGAGGCGGGCAGATCACG	-0.53;1.75	36237;75411	3.03E-01;2.31E-02	2031;41205	1.29E+00;5.48E-01
LOC101927967	0.606905	0.919907	2	CAAGGCAGGCAGATCACCTG;GCCGAGGCGGGCAGATCACG	-0.53;1.75	36237;75411	3.03E-01;2.31E-02	2031;41205	1.29E+00;5.48E-01
LOC105379102	0.606905	0.919907	2	CAAGGCAGGCAGATCACCTG;GCCGAGGCGGGCAGATCACG	-0.53;1.75	36237;75411	3.03E-01;2.31E-02	2031;41205	1.29E+00;5.48E-01
LINC02405	0.606905	0.919907	2	CAAGGCAGGCAGATCACCTG;GCCGAGGCGGGCAGATCACG	-0.53;1.75	36237;75411	3.03E-01;2.31E-02	2031;41205	1.29E+00;5.48E-01
LOC100996251	0.606905	0.919907	2	CAAGGCAGGCAGATCACCTG;GCCGAGGCGGGCAGATCACG	-0.53;1.75	36237;75411	3.03E-01;2.31E-02	2031;41205	1.29E+00;5.48E-01
LOC102724404	0.606905	0.919907	2	CAAGGCAGGCAGATCACCTG;GCCGAGGCGGGCAGATCACG	-0.53;1.75	36237;75411	3.03E-01;2.31E-02	2031;41205	1.29E+00;5.48E-01
LINC01697	0.606905	0.919907	2	CAAGGCAGGCAGATCACCTG;GCCGAGGCGGGCAGATCACG	-0.53;1.75	36237;75411	3.03E-01;2.31E-02	2031;41205	1.29E+00;5.48E-01
LINC01695	0.606905	0.919907	2	CAAGGCAGGCAGATCACCTG;GCCGAGGCGGGCAGATCACG	-0.53;1.75	36237;75411	3.03E-01;2.31E-02	2031;41205	1.29E+00;5.48E-01
LOC105375535	0.606905	0.919907	2	CAAGGCAGGCAGATCACCTG;GCCGAGGCGGGCAGATCACG	-0.53;1.75	36237;75411	3.03E-01;2.31E-02	2031;41205	1.29E+00;5.48E-01
LOC107986711	0.606905	0.919907	2	CAAGGCAGGCAGATCACCTG;GCCGAGGCGGGCAGATCACG	-0.53;1.75	36237;75411	3.03E-01;2.31E-02	2031;41205	1.29E+00;5.48E-01
LOC105372505	0.606905	0.919907	2	CAAGGCAGGCAGATCACCTG;GCCGAGGCGGGCAGATCACG	-0.53;1.75	36237;75411	3.03E-01;2.31E-02	2031;41205	1.29E+00;5.48E-01
LOC107984582	0.606905	0.919907	2	CAAGGCAGGCAGATCACCTG;GCCGAGGCGGGCAGATCACG	-0.53;1.75	36237;75411	3.03E-01;2.31E-02	2031;41205	1.29E+00;5.48E-01
LOC105370982	0.606905	0.919907	2	CAAGGCAGGCAGATCACCTG;GCCGAGGCGGGCAGATCACG	-0.53;1.75	36237;75411	3.03E-01;2.31E-02	2031;41205	1.29E+00;5.48E-01
LOC105377490	0.606905	0.919907	2	CAAGGCAGGCAGATCACCTG;GCCGAGGCGGGCAGATCACG	-0.53;1.75	36237;75411	3.03E-01;2.31E-02	2031;41205	1.29E+00;5.48E-01
LOC105370328	0.606905	0.919907	2	CAAGGCAGGCAGATCACCTG;GCCGAGGCGGGCAGATCACG	-0.53;1.75	36237;75411	3.03E-01;2.31E-02	2031;41205	1.29E+00;5.48E-01
LOC105375421	0.606905	0.919907	2	CAAGGCAGGCAGATCACCTG;GCCGAGGCGGGCAGATCACG	-0.53;1.75	36237;75411	3.03E-01;2.31E-02	2031;41205	1.29E+00;5.48E-01
LOC105375999	0.606905	0.919907	2	CAAGGCAGGCAGATCACCTG;GCCGAGGCGGGCAGATCACG	-0.53;1.75	36237;75411	3.03E-01;2.31E-02	2031;41205	1.29E+00;5.48E-01
LOC101059986	0.606905	0.919907	2	CAAGGCAGGCAGATCACCTG;GCCGAGGCGGGCAGATCACG	-0.53;1.75	36237;75411	3.03E-01;2.31E-02	2031;41205	1.29E+00;5.48E-01
LOC105373415	0.606905	0.919907	2	CAAGGCAGGCAGATCACCTG;GCCGAGGCGGGCAGATCACG	-0.53;1.75	36237;75411	3.03E-01;2.31E-02	2031;41205	1.29E+00;5.48E-01
LOC728730	0.606905	0.919907	2	CAAGGCAGGCAGATCACCTG;GCCGAGGCGGGCAGATCACG	-0.53;1.75	36237;75411	3.03E-01;2.31E-02	2031;41205	1.29E+00;5.48E-01
PVT1	0.606905	0.919907	2	CAAGGCAGGCAGATCACCTG;GCCGAGGCGGGCAGATCACG	-0.53;1.75	36237;75411	3.03E-01;2.31E-02	2031;41205	1.29E+00;5.48E-01
LOC105373893	0.606905	0.919907	2	CAAGGCAGGCAGATCACCTG;GCCGAGGCGGGCAGATCACG	-0.53;1.75	36237;75411	3.03E-01;2.31E-02	2031;41205	1.29E+00;5.48E-01
LOC107986215	0.606905	0.919907	2	CAAGGCAGGCAGATCACCTG;GCCGAGGCGGGCAGATCACG	-0.53;1.75	36237;75411	3.03E-01;2.31E-02	2031;41205	1.29E+00;5.48E-01
LOC105377356	0.606905	0.919907	2	CAAGGCAGGCAGATCACCTG;GCCGAGGCGGGCAGATCACG	-0.53;1.75	36237;75411	3.03E-01;2.31E-02	2031;41205	1.29E+00;5.48E-01
CCT6P3	0.606905	0.919907	2	CAAGGCAGGCAGATCACCTG;GCCGAGGCGGGCAGATCACG	-0.53;1.75	36237;75411	3.03E-01;2.31E-02	2031;41205	1.29E+00;5.48E-01
LOC107986324	0.606905	0.919907	2	CAAGGCAGGCAGATCACCTG;GCCGAGGCGGGCAGATCACG	-0.53;1.75	36237;75411	3.03E-01;2.31E-02	2031;41205	1.29E+00;5.48E-01
LOC105377095	0.606905	0.919907	2	CAAGGCAGGCAGATCACCTG;GCCGAGGCGGGCAGATCACG	-0.53;1.75	36237;75411	3.03E-01;2.31E-02	2031;41205	1.29E+00;5.48E-01
LOC339529	0.606905	0.919907	2	CAAGGCAGGCAGATCACCTG;GCCGAGGCGGGCAGATCACG	-0.53;1.75	36237;75411	3.03E-01;2.31E-02	2031;41205	1.29E+00;5.48E-01
LOC105374524	0.606905	0.919907	2	CAAGGCAGGCAGATCACCTG;GCCGAGGCGGGCAGATCACG	-0.53;1.75	36237;75411	3.03E-01;2.31E-02	2031;41205	1.29E+00;5.48E-01
LOC107986129	0.606905	0.919907	2	CAAGGCAGGCAGATCACCTG;GCCGAGGCGGGCAGATCACG	-0.53;1.75	36237;75411	3.03E-01;2.31E-02	2031;41205	1.29E+00;5.48E-01
LOC105372242	0.606905	0.919907	2	CAAGGCAGGCAGATCACCTG;GCCGAGGCGGGCAGATCACG	-0.53;1.75	36237;75411	3.03E-01;2.31E-02	2031;41205	1.29E+00;5.48E-01
LOC101927687	0.606905	0.919907	2	CAAGGCAGGCAGATCACCTG;GCCGAGGCGGGCAGATCACG	-0.53;1.75	36237;75411	3.03E-01;2.31E-02	2031;41205	1.29E+00;5.48E-01
LOC105378305	0.606905	0.919907	2	CAAGGCAGGCAGATCACCTG;GCCGAGGCGGGCAGATCACG	-0.53;1.75	36237;75411	3.03E-01;2.31E-02	2031;41205	1.29E+00;5.48E-01
LOC107984944	0.606905	0.919907	2	CAAGGCAGGCAGATCACCTG;GCCGAGGCGGGCAGATCACG	-0.53;1.75	36237;75411	3.03E-01;2.31E-02	2031;41205	1.29E+00;5.48E-01
ZNF767P	0.606905	0.919907	2	CAAGGCAGGCAGATCACCTG;GCCGAGGCGGGCAGATCACG	-0.53;1.75	36237;75411	3.03E-01;2.31E-02	2031;41205	1.29E+00;5.48E-01
CATIP-AS2	0.606646	1.00409	3	CAAGGCAGGCAGATCACCTG;AGTACACAGAATGGCGACCA;TCATCAAGATGTGGTCAGCG	-0.53;0.23;2.12	36237;53050;76607	4.01E-01;3.53E-01;1.41E-02	835;24392;41205	1.50E+00;6.91E-01;8.22E-01
LARP4	0.605856	1.10638	4	CCTGATGCCCAGTTACTGTG;AGTTTGCACACAATAGCAAC;ACTGTGCTTGAGTTTGAATG;CTTCTCATCAACTTGTACCA	-0.37;-0.07;1.19;1.67	39405;45720;70935;75065	6.18E-01;4.55E-01;5.88E-01;5.41E-02	2377;6507;31722;38037	9.51E-01;1.45E+00;7.90E-01;1.24E+00
GALNS	0.605773	1.3308	6	CAAGGCAGGCAGATCACCTG;TGTTGTCATAAGGTCCAAAG;GGACGGCTACCCATCCGCAA;AGCCATCCGGTCCAAATTCG;GCCGAGGCGGGCAGATCACG;TCAGCAAGATTGTCGGCAAG	-0.53;-0.15;0.12;0.29;1.75;2.16	36237;43910;50500;54380;75411;76688	9.22E-01;7.71E-01;6.32E-01;4.90E-01;8.61E-01;2.55E-02	754;2031;23062;26942;33532;41205	1.25E+00;2.03E+00;7.38E-01;1.03E+00;1.29E+00;1.64E+00
PHF10	0.605728	1.41037	4	CCCTTCAGATACATTGCCAG;CACCATCACTGTCTAGAGCA;CCCCGGAGCGCAGTCCCCGA;AGGTTATCCAGGTACCTCAA	-1.64;1.17;1.17;1.73	22681;70719;70724;75305	3.83E-01;1.42E+00;5.78E-01;4.86E-02	2137;6718;6723;54761	9.94E-01;1.42E+00;2.62E+00;6.02E-01
AP1S2	0.60566	1.09451	4	GGACAATGAACTAATTACCC;ATCTGAAGATTGTTTACAAA;TCTTCAGATCTCGCCACTCA;TCTTCTCTTTGTCTGATAGT	-0.21;-0.05;0.39;2.29	42695;46121;56778;76877	7.01E-01;4.58E-01;3.76E-01;1.27E-02	565;20664;31321;34747	1.54E+00;6.39E-01;8.02E-01;1.39E+00
PCDHAC2	0.604365	1.35292	5	CTTTCACATAGAGAGTGCGC;CAAGGCAGGCAGATCACCTG;CTTTGGAAACTCCTATACAC;TTATCGCGTCCAGCTACGGG;CATGTCCACCACATATACGT	-0.83;-0.53;1.16;1.51;1.72	31486;36237;70563;74018;75263	5.98E-01;4.82E-01;1.22E+00;7.34E-01;6.19E-02	2179;3424;6879;41205;45956	9.01E-01;1.77E+00;2.24E+00;7.27E-01;1.13E+00
LOC728519	0.603702	0.680476	1	AGATATCAAGCAAAGACATG	0.6	61280	0.102	16162	0.68
DSC1	0.603248	1.16462	4	AAAATGTGAACTTACCGGAT;CTGGACCCGGAAATATCCAG;TTGTATACAGCCTTTGAGTG;ATAATGGAAGTGCGAGACAT	0.19;0.44;0.69;1.09	52131;57796;63106;69795	1.03E+00;6.67E-01;3.97E-01;1.81E-01	7647;14336;19646;25311	5.39E-01;8.65E-01;1.31E+00;1.94E+00
DSCAS	0.603248	1.16462	4	AAAATGTGAACTTACCGGAT;CTGGACCCGGAAATATCCAG;TTGTATACAGCCTTTGAGTG;ATAATGGAAGTGCGAGACAT	0.19;0.44;0.69;1.09	52131;57796;63106;69795	1.03E+00;6.67E-01;3.97E-01;1.81E-01	7647;14336;19646;25311	5.39E-01;8.65E-01;1.31E+00;1.94E+00
KCNJ11	0.60245	1.11182	4	CAAGAAAGGCAACTGCAACG;CCACGATGTTCTGCACGATG;TCTTGCGTACCACCTGCATG;CCTCATCTTCAGCAAGCATG	-0.14;0.02;1.14;1.38	44231;48301;70392;72968	7.44E-01;4.81E-01;5.63E-01;1.03E-01	4474;7050;29141;33211	7.14E-01;1.39E+00;8.76E-01;1.47E+00
LOC105369965	0.602326	1.10676	4	TTCCCCAAAGCCAAGTACAT;GAGCGAGGCAGAGTGCGACA;GTGTACCAGACACAAGTCCA;CATGTCTGTGGACAAATGCG	0.01;0.33;0.64;1.42	48037;55399;62118;73327	8.67E-01;6.04E-01;3.89E-01;9.48E-02	4115;15324;22043;29405	7.44E-01;8.21E-01;1.18E+00;1.68E+00
WSCD2	0.602326	1.10676	4	TTCCCCAAAGCCAAGTACAT;GAGCGAGGCAGAGTGCGACA;GTGTACCAGACACAAGTCCA;CATGTCTGTGGACAAATGCG	0.01;0.33;0.64;1.42	48037;55399;62118;73327	8.67E-01;6.04E-01;3.89E-01;9.48E-02	4115;15324;22043;29405	7.44E-01;8.21E-01;1.18E+00;1.68E+00
C3orf56	0.602101	1.07011	4	GATACGGACTTCCTATGAGG;AGGAGTAGATGACAGGCCAG;CTGCCTTGGTGCCTTCAGTG;AGGTGGGTGGGAATTTCATG	-0.26;0.06;0.64;1.96	41469;49220;62120;76212	6.68E-01;4.92E-01;3.89E-01;2.78E-02	1230;15322;28222;35973	1.22E+00;8.21E-01;9.10E-01;1.33E+00
TGIF2LY	0.601104	1.38587	6	AGAGCACAAGAAGAAGCGCA;AGACCAATTTGTCTTTGTTG;GTTATTTCTCGACATGATTG;CGTAGAAACGACCCCATCAT;GCGACTGGATGTATAAGCAT;GCGGAGGATCTTAACGGACT	-0.96;-0.35;0.5;1.01;1.65;1.76	29690;39698;59040;68633;74940;75489	6.88E-01;6.53E-01;9.25E-01;9.22E-01;7.84E-01;6.65E-02	1953;2502;8809;18402;37744;47752	8.76E-01;1.86E+00;1.69E+00;1.56E+00;1.07E+00;1.26E+00
NXPH2	0.601093	1.17566	5	CAAGGCAGGCAGATCACCTG;GGAAGTGGTGCATGCCACGG;CATTGGCAAGAACTAAACGG;CTTGGTACCACCCTCCAAGG;AGGGACGTTGGTCGGCAACG	-0.53;-0.29;0.43;1.03;2.37	36237;41000;57550;68930;76966	7.27E-01;5.35E-01;5.67E-01;4.62E-01;1.34E-02	476;8512;19892;36442;41205	1.52E+00;1.07E+00;1.03E+00;8.87E-01;1.37E+00
PNRC2P1	0.600579	0.678867	1	GCTTAACAGACAGAAGACCA	0.6	61220	0.102	16222	0.679
TRIML2	0.600238	1.1799	4	AGAACTATGAGATTGAGACA;TCTTACCTTGAGCAATGCCA;CATGGTGTGTGGGATACAAG;ACATCACAGAACAGCCGTGT	0.14;0.49;0.83;0.94	51012;58902;65698;67548	9.80E-01;7.01E-01;4.31E-01;2.37E-01	9894;11744;18540;26430	4.70E-01;1.00E+00;1.38E+00;1.87E+00
CLGN	0.600137	1.65384	5	TTAGGATTATCGACCAGTGG;CTGCCGTCAAACCAGAAGAC;GAATTAAAAGGGTATACCAA;GAGGAAATTTCAATATACGA;GCCGAGGCGGGCAGATCACG	-2.32;0.87;1.15;1.55;1.75	16843;66312;70495;74334;75411	3.90E-01;1.66E+00;1.22E+00;7.69E-01;5.77E-02	2031;3108;6947;11130;60599	9.28E-01;1.85E+00;2.22E+00;2.74E+00;5.33E-01
PIGN	0.59998	1.08739	4	GAAGAAAGTCCAACTCAGTG;ATGCAACAAAACTGGATACG;GTCTGTCATTCCATGGTCAG;GCCACTGCCAATATGGTATG	-0.01;0.1;0.79;1.52	47016;50113;64981;74110	8.32E-01;5.05E-01;4.20E-01;7.64E-02	3332;12461;27329;30426	8.21E-01;9.61E-01;9.44E-01;1.62E+00
HHLA1	0.599638	1.09735	4	AAGCTCTGTCAGGTTAAGCG;TGACAGCTGACAGACAGACG;CAGAACACCAGACAAGCCGC;ACAGAGGAGACCCTGAACAC	0.06;0.1;0.6;1.64	49031;50140;61248;74849	9.03E-01;5.05E-01;3.83E-01;5.91E-02	2593;16194;27302;28411	9.17E-01;7.85E-01;9.45E-01;1.74E+00
SLC35E2	0.599602	1.24586	5	CGCTGCTCTACCTCACGCTG;CAAGTCTGACTCGATGACCG;ATCGTCATAAGGAAGTTGGG;ACGGTCATCGAGTCAGACTT;ATATAAACAGCAAGGAACGA	-0.17;0.23;0.76;0.87;1.31	43437;53013;64362;66410;72353	9.82E-01;8.32E-01;7.86E-01;4.14E-01;1.48E-01	5089;11032;13080;24429;34005	6.01E-01;8.93E-01;1.48E+00;1.47E+00;1.79E+00
FHL1	0.599594	1.12602	4	GTCTAGGCCATCACATCTGG;TGTGCAACAAGTGCACCACT;ATGCCGCAAGCCCATCGGTG;ATCAAAACGTGGAGTACAAG	0.11;0.38;0.48;1.43	50253;56589;58628;73393	9.50E-01;6.34E-01;3.75E-01;9.33E-02	4049;18814;20853;27189	7.50E-01;6.93E-01;1.24E+00;1.82E+00
TGIF2LX	0.599536	1.5989	7	CCGGCCAAGTCAGGGCCCAG;AGAGCACAAGAAGAAGCGCA;GTTATTTCTCGACATGATTG;CGTAGAAACGACCCCATCAT;CTTTGTTGCAGATTTCTAAC;GCGACTGGATGTATAAGCAT;GCGGAGGATCTTAACGGACT	-1.0;-0.96;0.5;1.01;1.24;1.65;1.76	29218;29690;59040;68633;71537;74940;75489	8.13E-01;5.60E-01;1.31E+00;1.50E+00;1.09E+00;7.31E-01;7.76E-02	1953;2502;5905;8809;18402;47752;48224	8.20E-01;1.73E+00;1.95E+00;2.39E+00;2.03E+00;8.31E-01;1.44E+00
THOC6	0.59875	1.15704	4	GCCGCCAGAAACTTCCCACA;CAAGGAGGTCCAGACGATCG;AGAGGAAAGTAAGAAGCCGG;ACTAAGCAGATGTCGATCGG	-0.1;0.69;0.73;1.07	45007;63113;63875;69531	7.68E-01;8.65E-01;4.05E-01;1.87E-01	7911;13567;14329;32435	5.29E-01;9.02E-01;1.69E+00;1.51E+00
ZNF285	0.598399	1.07917	4	TGCCTGCCCACTCTTCACTG;AATGAAGCACTTCTTGCGAA;TTTCCCATGTAATAACTGTG;CCTACAAATGCGATGAATGT	-0.02;-0.01;0.69;1.73	46944;47139;63057;75336	8.29E-01;4.68E-01;3.97E-01;4.79E-02	2106;14385;30303;30498	9.99E-01;8.62E-01;8.36E-01;1.62E+00
TRMU	0.598258	1.11798	4	CCGCGTGCACTGGATTGCGG;AAGCACGTTAAGAAGCCCGA;CTTTCGTTAATCCCCCCAGA;TTGGGCCAGAGAGCAAACAT	0.1;0.2;0.81;1.28	49982;52425;65357;72039	9.39E-01;5.42E-01;4.26E-01;1.26E-01	5403;12085;25017;27460	6.48E-01;9.83E-01;1.04E+00;1.80E+00
DEF6	0.59729	1.10165	4	GCTGTCCCACAACCTGTACA;AGGCGCTCATCTCATACGTG;TCATCAGGAACCATGATCAG;CTTCACTCCCAAAGTAGCAG	-0.19;-0.17;0.33;2.42	43068;43529;55303;77021	7.11E-01;4.39E-01;3.80E-01;9.45E-03	421;22139;33913;34374	1.67E+00;6.02E-01;7.24E-01;1.41E+00
AGPAT5	0.597274	1.23974	5	CAAGGCAGGCAGATCACCTG;GACCCCCCAGGCCAACACGT;GCAAAGTAACACCCATACAA;AAAATCACAAGATACATCTG;CTTCTTCGAGAATTACACCG	-0.53;0.28;0.67;1.22;1.35	36237;54151;62705;71383;72653	7.27E-01;8.76E-01;7.16E-01;5.49E-01;1.39E-01	4789;6059;14738;23291;41205	6.21E-01;1.32E+00;1.35E+00;1.54E+00;1.37E+00
SLC2A2	0.596932	1.10827	4	CCTTTACATCAAGTTAGATG;CACCGATATACATAGGAACC;GTGCCACTAGAATAGGCTGT;TAGTTGGAGCTCTCTTGATG	-0.17;0.47;0.84;1.24	43601;58593;65874;71572	7.26E-01;6.92E-01;4.34E-01;1.37E-01	5870;11568;18849;33841	6.21E-01;1.01E+00;1.36E+00;1.44E+00
AWAT1	0.596879	1.17666	4	AAGCACTGGTAGCGGCCACA;CATGAGGTACTCCCTAACAA;GAAGTTGCAGAAGGCGCCAA;CAGATGGCAAGGTAGCTCAA	-0.2;0.75;0.87;0.97	42765;64166;66460;68036	7.03E-01;9.17E-01;4.45E-01;2.25E-01	9406;10982;13276;34677	4.82E-01;1.05E+00;1.78E+00;1.40E+00
FOXS1	0.596658	1.15636	4	GGCACGCCGTGGACCCCTCA;CCCAAGGGCCTAAGCTTTGG;CGAATCGGCCCATGATGTAG;TGCCACGACATGTTTGAGCA	-0.3;0.69;0.93;1.06	40801;63144;67360;69383	6.51E-01;8.67E-01;4.65E-01;1.91E-01	8059;10082;14298;36641	5.24E-01;1.11E+00;1.69E+00;1.30E+00
KLHL38	0.59603	1.35204	4	TGCCTCCCCCGTATACACGT;GGGACTATCTCGGAGATGAT;CCCTGAAACTCAATCAGTGG;CTACTGTACAGCAAACAGAC	-1.63;0.73;1.56;1.73	22774;63836;74378;75303	3.83E-01;9.00E-01;8.53E-01;4.86E-02	2139;3064;13606;54668	9.93E-01;2.06E+00;1.75E+00;6.05E-01
ZNF582	0.595584	1.51355	5	GGTTTGGAAACGGCAAGACC;GAACTCCTTATTAATCATCA;ATGAAGTCGAATCACCCCAA;CAGCATCAGAGAATTCACAC;GATGCATGCTGGTCAAAAGT	-1.64;0.82;1.16;1.17;1.47	22662;65489;70615;70779;73708	4.36E-01;1.58E+00;1.23E+00;5.23E-01;1.07E-01	3734;6663;6827;11953;54780	7.04E-01;1.25E+00;2.24E+00;2.62E+00;7.52E-01
LOC107987299	0.595006	0.675852	1	CCTGACAATGAGACCGACTG	0.6	61107	0.103	16335	0.676
F2RL2	0.594996	1.21492	5	GGTAACATGTGGACTGGTGT;ATGTGAAAAATGCTACCATG;GTAGGTGAAAGGATGGACGA;CCTGAAGAAAAGCATCCACA;GCCGAGGCGGGCAGATCACG	-0.06;0.22;0.44;0.62;1.75	46080;52805;57908;61682;75411	1.10E+00;8.25E-01;5.75E-01;3.88E-01;5.77E-02	2031;15760;19534;24637;31362	9.28E-01;6.79E-01;1.05E+00;1.46E+00;1.96E+00
FFAR2	0.59485	1.1145	4	GGGAGAGCTTGTACTGCACG;GTATTGAACGATGATCACGA;GAACTTCACCGATAACCAGT;TGTAGAAGCCAAAACTCGTG	0.07;0.35;0.65;1.31	49444;55784;62264;72269	9.18E-01;6.14E-01;3.90E-01;1.20E-01	5173;15178;21658;27998	6.63E-01;8.27E-01;1.20E+00;1.77E+00
JMJD4	0.593181	1.11136	4	CTGGAAAGAGTACATACAGG;TGTACCAGTTGCAAACTGTG;GGACGAGAAGTACACAGGCA;GAAGATGTCAGCATGGAACG	-0.03;0.44;0.76;1.2	46686;57774;64491;71105	8.21E-01;6.67E-01;4.13E-01;1.48E-01	6337;12951;19668;30756	5.96E-01;9.34E-01;1.31E+00;1.60E+00
DDX39A	0.59299	1.19733	4	CCTGGTCATGTGCCACACGA;GAAGAACTGTCCCCATGTCG;CTCAAAGCCACAGTCCACGA;CCCCCTAAGAAAGACATCAA	0.29;0.51;0.61;0.96	54524;59326;61350;67905	1.14E+00;7.15E-01;3.84E-01;2.28E-01	9537;16092;18116;22918	4.79E-01;7.89E-01;1.41E+00;2.12E+00
FZD5	0.592354	1.08448	4	CGGCATGAAGTGGGGCAACG;CATGGATTACAACCGCAGCG;CCAGTTCAACCACGACACGC;GGAAGCGTTCCATGTCGATG	-0.48;-0.01;1.12;1.74	37139;47067;70183;75373	5.68E-01;4.67E-01;5.54E-01;4.70E-02	2070;7259;30375;40303	1.01E+00;1.36E+00;8.34E-01;1.13E+00
TFAP2D	0.591894	1.19133	4	CAAGGTGGAGTGATAAGAAG;CTTGGCTTAAACTTACCAGC;ATTGTGCAGGTTAATAAAGT;ACTCGTAATGGAAGGACTGG	0.32;0.33;0.78;0.93	55162;55411;64843;67420	1.17E+00;6.05E-01;4.18E-01;2.41E-01	10022;12599;22031;22280	4.67E-01;9.53E-01;1.18E+00;2.16E+00
GPR88	0.591561	1.10591	4	GCTTGACGCTGACACGCACG;AGCAACGCCTTCATCGTGAA;AGCGCCGGGTAGTGGACTCG;GGAGTGACACCGGGATGCGC	0.05;0.26;0.77;1.29	48965;53621;64619;72079	9.01E-01;5.65E-01;4.15E-01;1.25E-01	5363;12823;23821;28477	6.51E-01;9.41E-01;1.09E+00;1.74E+00
FAM181B	0.591218	1.0893	4	GAAGCTGAGTAGATCGCGGG;CCCTAGCGCCCCGACAGTCG;ACTTCGGCTTTGCAAGCTGG;GGCTCCGTGAAGAAGGACGG	-0.19;0.38;0.87;1.3	43054;56440;66434;72248	7.11E-01;6.30E-01;4.45E-01;1.21E-01	5194;11008;21002;34388	6.62E-01;1.05E+00;1.24E+00;1.41E+00
UGT2B17	0.59092	1.09648	4	AATATGTTCACCTTAGGCAA;AGCATATGATCTGAAGAAGT;GCAGATGCCGTTAATCCCTG;TACACAGTTGAGAAGAATGG	-0.3;0.46;0.9;1.3	40720;58347;66995;72172	6.49E-01;6.84E-01;4.57E-01;1.22E-01	5270;10447;19095;36722	6.57E-01;1.09E+00;1.35E+00;1.30E+00
MCAT	0.590827	1.17898	5	GCTGCTGCGAGATGCGACCG;AGTTGGACACTTCACATACG;GTGATGTAGTTTCTCGACAG;GCGGGTAGTTGAGCAGACCG;GCCGAGGCGGGCAGATCACG	-0.24;0.05;0.5;0.89;1.75	42015;48976;59250;66690;75411	9.25E-01;7.02E-01;6.07E-01;4.18E-01;5.77E-02	2031;10752;18192;28466;35427	9.28E-01;9.10E-01;1.12E+00;1.24E+00;1.70E+00
TRIP10	0.590822	1.09957	4	AGAGTAAGCGTAAATTTGAG;CAAGACATACACGGACACTG;AGGCTTACGCCAAACAACTG;AGAAAGCAAAAACGAATATG	-0.1;0.3;0.95;1.22	45101;54618;67641;71280	7.70E-01;5.86E-01;4.72E-01;1.44E-01	6162;9801;22824;32341	6.05E-01;1.13E+00;1.14E+00;1.52E+00
NAA35	0.590242	1.21039	5	CAAGGCAGGCAGATCACCTG;TCAGATCCATGGACATAACA;AAGTAGCCTCTGGTTCACAA;TAGAGTACTCGAAGTCGACA;TACTTGGGGGAAAGCACCGG	-0.53;0.04;0.86;0.91;1.67	36237;48748;66280;67012;75053	7.27E-01;6.96E-01;8.85E-01;4.23E-01;6.80E-02	2389;10430;11162;28694;41205	8.66E-01;9.30E-01;1.66E+00;1.23E+00;1.37E+00
FOXE1	0.590124	1.4976	4	GGCGCTTGACCCCAACGCGG;GGCTTACATGCACGACGCGG;AGCCTGCATAGACGGCGCCC;GCCTCCAGTCTACTACCCCG	-2.48;1.01;1.13;2.7	15158;68663;70323;77221	3.90E-01;1.22E+00;5.60E-01;4.94E-03	221;7119;8779;62279	1.95E+00;1.38E+00;2.29E+00;3.79E-01
FA2H	0.58993	1.21088	5	GGTACTCGATGAGGCTCCAG;TATGGAACCACGGTTCAAAG;TCTTAGAGAGGCCCTCAATG;CATCGTACTTCTCTCCCAAG;GCCGAGGCGGGCAGATCACG	-0.46;0.36;0.65;0.66;1.75	37521;56026;62181;62425;75411	7.67E-01;9.56E-01;6.97E-01;3.88E-01;5.77E-02	2031;15017;15261;21416;39921	9.28E-01;7.06E-01;1.31E+00;1.67E+00;1.44E+00
VSIG2	0.589157	1.08452	4	AGACGCACCCAGTTGTACAC;GACGTCAGTCAGTTTCAGTG;GACTGCATAAGGGATTACTG;GTCTCCCACCGACGTGCTGT	-0.07;0.13;0.94;1.37	45618;50653;67480;72859	7.86E-01;5.13E-01;4.68E-01;1.06E-01	4583;9962;26789;31827	7.05E-01;1.12E+00;9.65E-01;1.54E+00
DNASE1L2	0.589106	1.08864	4	TTGTACTGGTCCCGGCCCAG;CTGGACGTGATCGACAAGTG;AAAGTGTCGGACCCCGCTTG;GAAGGCTCCGATGCGAAGCG	-0.19;0.07;1.08;1.39	42965;49439;69628;73097	7.08E-01;4.95E-01;5.33E-01;1.00E-01	4345;7814;28003;34477	7.24E-01;1.31E+00;9.18E-01;1.41E+00
HRH1	0.589028	1.2073	5	TGTATGCCGTACGGAGTGAG;CGATACTTAAGGTACCTGAG;CTTGTCCTCTCGGCGCACCG;TGACCCCAACGATCCATACG;GTCACCATCCCAAACCCCCA	-0.46;0.28;0.71;0.8;1.62	37566;54294;63429;65074;74749	7.68E-01;8.82E-01;7.45E-01;4.00E-01;7.68E-02	2693;12368;14013;23148;39876	8.21E-01;8.20E-01;1.40E+00;1.55E+00;1.44E+00
C7orf57	0.588964	1.13663	4	GTGAAGCTCGCGAAACAAGG;GTGGATATACCAGTCTGGCA;AGGATTCTTAGGGCCAAGTG;ATGAACCATGTAATCCGGCA	0.15;0.3;0.81;1.09	51128;54786;65352;69806	9.85E-01;5.90E-01;4.26E-01;1.80E-01	7636;12090;22656;26314	5.39E-01;9.82E-01;1.15E+00;1.88E+00
PCCA	0.587592	1.4464	7	CAAGGCAGGCAGATCACCTG;TCCTGCCTCAGCCTCCCGAG;GGAAGCCATTAAGAAAACCA;ACCTGGATTTCTATATGACG;ATATGGCTCTGATAGAACTG;GTAAACCAAAAGACTTGTAG;GCCGAGGCGGGCAGATCACG	-0.53;-0.4;0.56;0.74;0.85;1.15;1.75	36237;38719;60339;64040;66120;70519;75411	1.13E+00;7.85E-01;1.40E+00;1.07E+00;6.91E-01;4.48E-01;8.08E-02	2031;6923;11322;13402;17103;38723;41205	8.05E-01;9.78E-01;1.24E+00;1.75E+00;2.17E+00;1.26E+00;1.92E+00
TM2D2	0.586906	1.10299	4	GTTGTTATTCCACAGTTCGG;CATTTCCAACATGATCCACT;ACTCAATTCCATCTAAGGCA;GTTAGTTACTTACTTCTGTG	-0.1;0.44;0.82;1.18	45044;57907;65556;70874	7.69E-01;6.71E-01;4.29E-01;1.54E-01	6568;11886;19535;32398	5.85E-01;9.94E-01;1.32E+00;1.51E+00
ABCC4	0.586795	1.61542	6	GAGAATCGCTTGAATCCGGG;CAAGGCAGGCAGATCACCTG;GCGTCACTGCCACGAACACG;CAGATTGACTATCTGGCCTG;AAGCACGGGTAAACCTTGCA;GAAGGTACGATTCCTTAGTG	-1.64;-0.53;0.94;1.53;1.54;1.69	22685;36237;67516;74160;74258;75128	5.08E-01;5.80E-01;1.55E+00;1.65E+00;6.99E-01;7.90E-02	2314;3184;3282;9926;41205;54757	8.12E-01;1.67E+00;2.87E+00;2.51E+00;9.22E-01;9.03E-01
PCDHB13	0.586778	1.56727	4	AGAGGAAACGTAGTCCCAGG;ATCTCTGAGGACAGTCCGGT;TGAGAACGCGCCTGAAACTG;GAGCTGTGTTATCAGCATAG	-3.16;0.49;1.62;3.4	7509;58931;74726;77387	5.44E-01;7.02E-01;9.00E-01;1.21E-03	55;2716;18511;69927	2.55E+00;2.16E+00;1.38E+00;1.77E-01
TEDDM1	0.586496	1.09793	4	CCTCACTCTTAATGGCTGTG;ATGGCGGGATGGTGCTCATG;GGATTACTAAAGATAGTGAC;GCCCATCATCAGAATCAGAA	-0.19;-0.02;1.19;1.37	43027;46912;70932;72862	7.10E-01;4.66E-01;5.88E-01;1.06E-01	4580;6510;30530;34415	7.05E-01;1.45E+00;8.28E-01;1.41E+00
PTGIR	0.586095	1.05608	4	GCGCGCATAGGCCACGAACA;GAAGGCGAAGGCATCGCACA;CACACCGGCCACGAACATCA;CGCCAGCAGAAGCGCCACCA	-0.34;0.16;0.58;1.95	39884;51464;60734;76169	6.29E-01;5.26E-01;3.81E-01;2.88E-02	1273;16708;25978;37558	1.20E+00;7.65E-01;9.99E-01;1.26E+00
LOC105374505	0.586043	0.957547	3	ATTCGATTGATCTTACCCTG;CCACAACTCATCCATCACGG;GCCGAGGCGGGCAGATCACG	-0.13;0.14;1.75	44309;51067;75411	5.03E-01;3.52E-01;3.46E-02	2031;26375;33133	1.13E+00;6.39E-01;1.11E+00
RAB43P1	0.585008	0.670724	1	GGCGCCTTCTCGGAGCGCCA	0.59	60913	0.104	16529	0.671
RBM33	0.584797	1.10816	4	TCAGCGCGTCACCACCCTCG;AGGAGGAATGAAGGGCCGTG;AGGGAGCGACAGCATAAACA;AGCCAGCCGAGACCTGCCGT	-0.11;0.4;0.94;1.12	44778;56877;67481;70095	7.61E-01;6.42E-01;4.68E-01;1.73E-01	7347;9961;20565;32664	5.51E-01;1.12E+00;1.26E+00;1.50E+00
RGL4	0.584765	1.16846	4	CCGGAAAGATGACCGTTGCG;GCGATGGTGGCACGAACTGT;TGGGACGCCAGGGCGCACGA;TTCTTTACAGACCCACGACA	-1.0;0.45;1.34;1.55	29217;58001;72574;74313	4.38E-01;6.73E-01;6.84E-01;7.16E-02	3129;4868;19441;48225	8.45E-01;1.68E+00;1.32E+00;8.23E-01
PKD1L2	0.584759	1.16347	5	CAAGGCAGGCAGATCACCTG;GAATCTGTCGGAGAATATCG;GGGCTGGCCAGACAATGACA;TTGATCCCTACAACCCGCCG;GTCTACACAGGACACCGACG	-0.53;-0.36;0.46;1.02;2.34	36237;39485;58153;68828;76932	7.27E-01;5.14E-01;5.81E-01;4.60E-01;1.43E-02	510;8614;19289;37957;41205	1.49E+00;1.06E+00;1.06E+00;8.32E-01;1.37E+00
LCN9	0.58453	1.16028	4	CCTGTAGTCAGTCTCCGAGA;ATCCCCACACCGTTATGCAG;GCCATGTCTCCACGCAGATG;GAGACCTGAGGGTCTTCGTC	0.19;0.48;0.66;1.01	52005;58786;62463;68635	1.02E+00;6.98E-01;3.91E-01;2.10E-01	8807;14979;18656;25437	4.99E-01;8.36E-01;1.37E+00;1.93E+00
TIGD4	0.584187	1.06218	4	ATGGATGCGAAAGCTTGATG;TTTGGTACCAGACAGTCGAA;TAAGTGCAGTAATGGTTGGC;CAAAGACAGAATAACTCTGG	-0.12;-0.09;0.82;1.72	44510;45335;65569;75288	7.53E-01;4.52E-01;4.29E-01;4.90E-02	2154;11873;32107;32932	9.90E-01;9.95E-01;7.78E-01;1.49E+00
LOC100533757	0.583509	0.875708	2	CTCTTGATGACATAAAAGAA;AAGAAATTTGTAGAGACCCC	0.48;0.69	58687;63075	4.35E-01;1.78E-01	14367;18755	5.20E-01;1.23E+00
GPR75	0.583467	1.27541	5	CATCGACTGTGATTACAGGG;GCGGCCTCTCACCTGCCGGG;GTTCCTATACAGAGCCGGCA;CCAGCAATCAGACTGGACAT;GGAGAGAACCACCTGTACCA	0.06;0.44;0.47;0.74;1.21	49047;57789;58390;64105;71217	1.24E+00;1.04E+00;5.86E-01;3.93E-01;1.82E-01	6225;13337;19052;19653;28395	5.41E-01;7.74E-01;1.07E+00;1.81E+00;2.18E+00
ADAM15	0.583124	1.06361	4	CTCCAGACAGCTAATACTCG;AGTGCCACTCGTACATTCAG;CTGTTGTCAAAATTGCCAGG;TGGATTCGCGAAATAATGGG	-0.09;-0.02;0.83;1.62	45368;46807;65618;74730	7.79E-01;4.65E-01;4.30E-01;6.19E-02	2712;11824;30635;32074	9.00E-01;9.98E-01;8.25E-01;1.53E+00
DCST1-AS1	0.583124	1.06361	4	CTCCAGACAGCTAATACTCG;AGTGCCACTCGTACATTCAG;CTGTTGTCAAAATTGCCAGG;TGGATTCGCGAAATAATGGG	-0.09;-0.02;0.83;1.62	45368;46807;65618;74730	7.79E-01;4.65E-01;4.30E-01;6.19E-02	2712;11824;30635;32074	9.00E-01;9.98E-01;8.25E-01;1.53E+00
ALG1L14P	0.583104	0.820455	2	TTGAAGTTCACGGCACACAC;GTCCTCGGCCCTCCAGCCAG	0.16;1.01	51440;68575	3.51E-01;1.06E-01	8867;26002	6.93E-01;9.48E-01
LRRC63	0.582933	1.09637	4	TTCATAGATACAGTCATAGG;TGGTAAAACTGGTGTTGGCA;GAGAAATGCACTTAATCTGA;TCAGAGATACACGTTGTACG	-0.61;0.34;1.13;1.47	34976;55524;70294;73709	5.26E-01;6.07E-01;5.59E-01;8.58E-02	3733;7148;21918;42466	7.79E-01;1.38E+00;1.19E+00;1.04E+00
EARS2	0.582876	1.21105	5	GGACGGCGCGAGGCCAACCT;TCTTTGCTAAGAAGTACCAG;CCTGATGAGAGCCCCCGCCG;TGTCCAACAAGGAATCGGGC;GCCGAGGCGGGCAGATCACG	-0.47;-0.38;0.54;1.48;1.75	37409;39178;59906;73782;75411	7.63E-01;5.10E-01;6.25E-01;7.11E-01;5.77E-02	2031;3660;17536;38264;40033	9.28E-01;1.71E+00;1.16E+00;8.22E-01;1.43E+00
FKBP6	0.582264	1.07807	4	CTTACAGATATTACACTGTG;CTCAATCTCAAACAGGACAG;AGGCCCTATTGCTTCTGCGC;TCTATCCTAGTGAAATACTC	-0.52;0.13;1.1;1.61	36530;50837;69916;74698	5.56E-01;5.15E-01;5.44E-01;6.26E-02	2744;7526;26605;40912	8.96E-01;1.34E+00;9.73E-01;1.11E+00
POU3F4	0.582008	1.1268	4	GCGTTGGGGTGGTTAGTGTG;CAGGCTGCGAGTACACGTTG;TTGCCAGGATCACTCCGACG;GTCACCCAGTGATGCCCGAG	-0.12;0.58;0.82;1.04	44644;60843;65484;69128	7.57E-01;7.69E-01;4.28E-01;1.97E-01	8314;11958;16599;32798	5.15E-01;9.90E-01;1.51E+00;1.49E+00
OSGEPL1	0.581426	1.27889	4	CCAGAGTGCTCCACCATGAG;TGAGCCTCCATATGATGAAT;AAGTCTTTGGACATAGCACC;ATTGCAACTACCATAAAACC	-1.69;0.72;1.13;2.16	22295;63757;70197;76684	3.81E-01;8.96E-01;5.55E-01;1.71E-02	758;7245;13685;55147	1.42E+00;1.37E+00;1.74E+00;5.90E-01
CABP2	0.58134	1.1525	4	GGCCGTACATACGAGTTGGG;GAGTTTGACCGAGACCGGGA;GATCTCGATGAGCTCCATCT;TGGCTCGGCTCCCCACCAAG	-0.91;0.58;1.2;1.45	30351;60782;71125;73594	4.53E-01;7.67E-01;5.97E-01;8.85E-02	3848;6317;16660;47091	7.68E-01;1.47E+00;1.51E+00;8.64E-01
CCDC175	0.580872	1.19409	4	AAAACAAGAGTTGACTGCAC;ACGAATTGAATTACTTAACG;TCTTCCCAATAGCATTAAGA;TTTATTCTTTCTTACCGCTG	-0.92;0.85;1.05;1.35	30172;66033;69188;72683	4.50E-01;1.02E+00;5.17E-01;1.10E-01	4759;8254;11409;47270	6.92E-01;1.26E+00;1.96E+00;8.58E-01
C17orf112	0.580603	1.11176	4	AATTCCAGTTAGTATGAATG;ACCTTCGTAGCATTTGCTGA;GAATCTCCTGTGAATCAGCT;TCATGATTAGAGTTGGCCAG	0.18;0.23;0.61;1.31	51964;52963;61348;72272	1.02E+00;5.52E-01;3.84E-01;1.20E-01	5170;16094;24479;25478	6.63E-01;7.89E-01;1.06E+00;1.93E+00
TEX28P2	0.58034	1.06281	4	CAGGAGGAGAAGTGTAGGTG;GGAGTCCTATCACAGCCTAA;AAGCGACTCTCCAAGATGAA;ACAACTTACAGGATAGTGTC	-0.33;-0.18;0.84;2.0	40081;43166;65796;76337	6.34E-01;4.37E-01;4.33E-01;2.49E-02	1105;11646;34276;37361	1.26E+00;1.01E+00;7.14E-01;1.27E+00
TEX28P1	0.58034	1.06281	4	CAGGAGGAGAAGTGTAGGTG;GGAGTCCTATCACAGCCTAA;AAGCGACTCTCCAAGATGAA;ACAACTTACAGGATAGTGTC	-0.33;-0.18;0.84;2.0	40081;43166;65796;76337	6.34E-01;4.37E-01;4.33E-01;2.49E-02	1105;11646;34276;37361	1.26E+00;1.01E+00;7.14E-01;1.27E+00
TEX28	0.58034	1.06281	4	CAGGAGGAGAAGTGTAGGTG;GGAGTCCTATCACAGCCTAA;AAGCGACTCTCCAAGATGAA;ACAACTTACAGGATAGTGTC	-0.33;-0.18;0.84;2.0	40081;43166;65796;76337	6.34E-01;4.37E-01;4.33E-01;2.49E-02	1105;11646;34276;37361	1.26E+00;1.01E+00;7.14E-01;1.27E+00
LOC102030688	0.58034	1.06281	4	CAGGAGGAGAAGTGTAGGTG;GGAGTCCTATCACAGCCTAA;AAGCGACTCTCCAAGATGAA;ACAACTTACAGGATAGTGTC	-0.33;-0.18;0.84;2.0	40081;43166;65796;76337	6.34E-01;4.37E-01;4.33E-01;2.49E-02	1105;11646;34276;37361	1.26E+00;1.01E+00;7.14E-01;1.27E+00
IGFBP2	0.58011	1.06303	4	CAAGTCGGGTATGAAGGAGC;GGCGATGACCACTCAGAAGG;TCCTTCATACCCGACTTGAG;AAGGGTGGCAAGCATCACCT	-0.55;0.3;0.88;1.69	35986;54692;66556;75139	5.45E-01;5.88E-01;4.47E-01;5.24E-02	2303;10886;22750;41456	9.64E-01;1.06E+00;1.14E+00;1.09E+00
NKIRAS2	0.579263	1.43123	4	CTGTATGGGAACCATGTAGT;TGCGTTTCTATGACACCCGG;CTTGTTGCCAAGGACCACGA;ACGCAGGAGGACATCTACGT	-1.91;1.1;1.29;1.83	20416;69929;72120;75810	3.76E-01;1.34E+00;6.54E-01;3.70E-02	1632;5322;7513;57026	1.10E+00;1.61E+00;2.48E+00;5.32E-01
IER5L	0.579247	1.08597	4	GCGCGCGTTGCGGAGCACGT;CCGCACGGCGCGCCCCACCG;GCACCAGCACCTAGCGTACG;AGTGCAAGCCGAAGTCCGAA	-0.09;0.38;0.79;1.24	45185;56526;65016;71541	7.73E-01;6.32E-01;4.20E-01;1.38E-01	5901;12426;20916;32257	6.19E-01;9.63E-01;1.24E+00;1.52E+00
XKR8	0.577826	1.12428	4	TCAGGGCACAGACTTCATGC;AGTGCAGGGCCACATAGCTG;GTTCCACAGGAAGTAGATCA;GCCGAGCGCATACTGGACGG	0.04;0.27;0.96;1.04	48726;53914;67884;69059	8.92E-01;5.71E-01;4.78E-01;1.99E-01	8383;9558;23528;28716	5.13E-01;1.15E+00;1.11E+00;1.72E+00
PLD2	0.57753	1.27883	5	GTAGTTGCGATAGAAAGACA;ATGAGATGGCACCTGTCTCG;TAAACCTCAGGACTCAACCT;GGCACCGAAAGATATACCAG;GCCGAGGCGGGCAGATCACG	-1.25;0.29;0.59;1.51;1.75	26305;54329;61055;74065;75411	4.91E-01;8.83E-01;6.59E-01;7.39E-01;5.77E-02	2031;3377;16387;23113;51137	9.28E-01;1.78E+00;1.23E+00;1.56E+00;9.01E-01
CRIPT	0.57724	1.15316	4	CTAACAGGTGAAAAGAAACT;GCACCATCTTTCCATGTATC;GATGGTGCTAGGAATACCAC;CTTTGACTTCAAAAAAAGCA	0.07;0.49;0.84;0.91	49231;58919;65962;67077	9.10E-01;7.02E-01;4.36E-01;2.50E-01	10365;11479;18523;28211	4.59E-01;1.02E+00;1.38E+00;1.75E+00
RAB36	0.576939	1.21251	5	CCAGGGTCTGCACGTCAGTG;CGACGATTCGTGTAGCCCGC;TGGTTGGCGATCTCTACGTG;ACACGGTCGCGGCTCACAGG;GCCGAGGCGGGCAGATCACG	-0.51;0.5;0.51;0.64;1.75	36629;59120;59412;62040;75411	7.39E-01;1.11E+00;6.11E-01;3.88E-01;5.77E-02	2031;15402;18030;18322;40813	9.28E-01;6.92E-01;1.13E+00;1.92E+00;1.39E+00
NUP62	0.576514	2.0996	4	TAAATTCAAGGCAAAGCCGG;CAGTTGCTATTGACGCAAAG;ACAGCGACTCTTGCTTCGGG;GAGCCAATGTTGAAACCGGA	-3.44;1.77;1.93;2.06	4654;75499;76115;76457	7.00E-01;2.45E+00;1.19E+00;2.22E-02	985;1327;1943;72781	1.31E+00;2.77E+00;4.21E+00;1.08E-01
TDRD5	0.575613	1.17148	5	GCGAGTACCTTACCGAGGAA;GGGAACTGGTGTCTAATGGT;TCACCCAAGCCAAAGAACAA;TCACACTGAAAAATTAAACC;GCCGAGGCGGGCAGATCACG	-0.6;-0.04;0.69;1.08;1.75	35118;46327;63161;69609;75411	6.94E-01;6.34E-01;7.34E-01;4.81E-01;5.77E-02	2031;7833;14281;31115;42324	9.28E-01;1.13E+00;1.38E+00;1.11E+00;1.31E+00
BAALC-AS2	0.575336	0.665501	1	GTCCAGCTCTCGTAGTAGCG	0.58	60713	0.106	16729	0.666
AEN	0.575011	1.08071	4	TGTGGCTATCGACTGTGAGA;TGAGCATGCCTCCAGAACCA;ATTGCCATGGTAGCTCACAA;CGGGTACGGTAGTCAGCGAT	-0.07;0.2;0.27;1.89	45758;52430;54037;76015	7.91E-01;5.42E-01;3.86E-01;3.23E-02	1427;23405;25012;31684	1.16E+00;5.74E-01;1.04E+00;1.55E+00
ANKRD33	0.574395	1.0648	4	CGTTAATGAAGGCTGCCATG;CCGACAGCTTCGACACCGTG;GCCAGCACTACAAGCCCGAG;GGAGACTCACTAGAGGCACG	-0.37;0.41;0.45;1.81	39322;57156;58033;75712	6.16E-01;6.49E-01;3.75E-01;3.92E-02	1730;19409;20286;38120	1.08E+00;6.74E-01;1.28E+00;1.23E+00
IL11	0.574237	1.51545	4	GCTCTCTCCTGGCGGACACG;CGGACCTACTGTCCTACCTG;GCAGCCTTGTCAGCACACCT;GGACAAATTCCCAGCTGACG	-1.95;1.3;1.37;1.57	20038;72217;72903;74449	3.75E-01;1.62E+00;7.09E-01;6.84E-02	2993;4539;5225;57404	8.62E-01;1.74E+00;2.94E+00;5.20E-01
PPP1R9B	0.573728	1.48043	4	GGATTACGATCGTCGCAACG;TATCTTCGTCAAGACCGTGA;CAGCAGCCTGAACGAGAACG;GGCCGAGGTTACGGTCCACG	-1.99;-0.03;2.1;2.21	19740;46759;76566;76756	3.75E-01;4.64E-01;1.36E+00;1.54E-02	686;876;30683;57702	1.46E+00;3.13E+00;8.23E-01;5.11E-01
DSC3	0.573555	1.05809	4	CCTTGGTTACAGTTCATGTG;AATGTGTAGGTACTACAGTG;ACAGTCCTGGCAATAGACAA;GCAGACAAAATAATTGGCAG	-0.13;0.29;0.67;1.47	44300;54458;62696;73702	7.46E-01;5.83E-01;3.93E-01;8.60E-02	3740;14746;22984;33142	7.79E-01;8.46E-01;1.13E+00;1.47E+00
CNN2	0.573187	1.09166	4	GAGATGCCTTCTCGTGCCGT;TGAGTCCCTCGATCCAGGTG;TCACCCAGGCCAAGACTAAG;ACTCACCCGGTTCTTGACCT	-0.12;0.5;0.7;1.2	44651;59234;63383;71087	7.57E-01;7.12E-01;4.00E-01;1.49E-01	6355;14059;18208;32791	5.95E-01;8.78E-01;1.40E+00;1.49E+00
PDIA3	0.572574	1.98096	5	ACCCTGAAGATATTTAGAGA;TTTCGATGATTCATTCAGTG;CTCCGACGTGCTAGAACTCA;GCCGAGGCGGGCAGATCACG;ACAGAGCAAAAAATGACCAG	-3.49;1.14;1.42;1.75;2.04	4264;70409;73307;75411;76433	6.59E-01;2.21E+00;1.62E+00;9.29E-01;2.85E-02	1009;2031;4135;7033;73171	1.21E+00;2.20E+00;2.87E+00;3.51E+00;1.23E-01
CCDC75P1	0.572084	0.663998	1	ATTGGGTTGAAGAATGCACT	0.57	60655	0.106	16787	0.664
SLC12A8	0.571958	1.31304	5	GGGGCCAAACAAAACACCCG;TTATCCATTTGACACCTGCG;CCTGCCCAAAGAGTCTTGGA;GCCGAGGCGGGCAGATCACG;TCTATGTGTTTGGACAGGTG	-1.42;-0.31;-0.06;1.75;2.9	24572;40633;46050;75411;77299	4.63E-01;5.29E-01;4.62E-01;9.29E-01;3.99E-03	143;2031;31392;36809;52869	2.04E+00;2.20E+00;6.28E-01;8.73E-01;8.29E-01
TLE3	0.571765	1.12228	4	CGGGCCAGTGAGAAGCACCG;CCCACGAGGCACGTCTACAC;GGGAGCCGTTCATCTCATGG;AGACCCCACATACATGACCA	0.08;0.42;0.75;1.05	49497;57305;64199;69156	9.20E-01;6.53E-01;4.09E-01;1.97E-01	8286;13243;20137;27945	5.16E-01;9.19E-01;1.28E+00;1.77E+00
SNRPA	0.571604	1.45038	4	CTTGGCAATGATATCTGAGT;CGGGGCGCCTGAGTCATCGG;CTGGCGGGGGGATCATACCA;ATAGAAAGGGAAACCCTGCA	-2.2;0.59;1.75;2.15	17889;60978;75431;76666	3.77E-01;7.74E-01;1.02E+00;1.75E-02	776;2011;16464;59553	1.41E+00;2.42E+00;1.52E+00;4.56E-01
PLAC1	0.571137	1.117	4	CTGGCTACTCTCATGGAGCA;AACACGGTAGGTGAACTGGT;TGAACCGGCTGAAAACGCAG;GAGATACACTACTCTTCTAA	0.12;0.43;0.53;1.2	50554;57638;59877;71049	9.61E-01;6.63E-01;3.77E-01;1.50E-01	6393;17565;19804;26888	5.93E-01;7.34E-01;1.30E+00;1.84E+00
SLC15A1	0.571028	1.15623	5	TCCTGCCTCAGCCTCCCGAG;CCACCAAACGCAGACACACA;TTGTCCAATTGTGTAGACAA;TCTTGTACATCCCACTGCCA;GGGCCCACACTAGAAGCGTG	-0.4;-0.02;0.18;0.5;2.6	38719;46816;51811;59152;77163	8.06E-01;6.46E-01;4.84E-01;3.96E-01;7.81E-03	279;18290;25631;30626;38723	1.75E+00;6.05E-01;7.90E-01;1.13E+00;1.51E+00
CC2D1A	0.57085	1.30155	6	CAAGGCAGGCAGATCACCTG;AGATGCGGCGCTACGATCGG;CTGGACGCACCTTAGCCACG;GAGTTCACCATAGCGCCGGG;TGGGGCTGACGCGATTCTAG;GCCGAGGCGGGCAGATCACG	-0.53;-0.42;0.18;0.78;1.68;1.75	36237;38227;51933;64733;75085;75411	9.22E-01;6.19E-01;6.66E-01;7.05E-01;8.06E-01;6.92E-02	2031;2357;12709;25509;39215;41205	8.61E-01;1.91E+00;1.29E+00;1.10E+00;1.01E+00;1.64E+00
PUM1	0.570727	1.09446	4	TCTTAGACAGGAATCGCCCG;TAAGCAGCAGGAGCCAACAC;CAAACATCGATGGCCTACTG;CTTAAGGACTTACCGATGTG	-0.88;0.42;0.98;1.76	30759;57497;68220;75460	4.58E-01;6.59E-01;4.87E-01;4.50E-02	1982;9222;19945;46683	1.02E+00;1.18E+00;1.29E+00;8.79E-01
SHPK	0.57055	1.30616	5	AGAGGCCTGTAAATCACCCA;GCATTCTGGTCGGACATCAG;AGCTCGGGGCTCGAACACCG;GCCGAAGTCTCATCTCAGTG;GCCGAGGCGGGCAGATCACG	-1.37;0.05;0.8;1.62;1.75	25145;48882;65182;74753;75411	4.72E-01;6.99E-01;8.26E-01;8.22E-01;5.77E-02	2031;2689;12260;28560;52297	9.28E-01;1.96E+00;1.55E+00;1.23E+00;8.52E-01
WDR49	0.570408	1.22754	5	TTAGCAACCTCTGGTAATCA;AGGTAATCAGCTCTGATACA;GCTAACCTGGTATCATGTGG;ATGAATCGATACCTTACCAC;GCCGAGGCGGGCAGATCACG	-0.64;-0.39;1.01;1.13;1.75	34503;38887;68574;70215;75411	6.77E-01;5.07E-01;1.04E+00;5.01E-01;5.77E-02	2031;7227;8868;38555;42939	9.28E-01;1.19E+00;1.93E+00;8.12E-01;1.28E+00
TTYH3	0.570155	1.09718	4	CGCCTACGTGACCAAAATGG;AGCCTCTGTACGGCTCGCAG;CGCTCACCTGCACACCAGCG;AGCAGGTGGATCTCTACGAC	-0.18;-0.09;1.23;1.32	43199;45353;71511;72372	7.15E-01;4.52E-01;6.18E-01;1.18E-01	5070;5931;32089;34243	6.70E-01;1.52E+00;7.78E-01;1.42E+00
ANGPTL8	0.569368	1.49163	4	GCCGCACAATAGAACTCCTG;CAGTTCTGGGCCGCCCATGG;CTTTGTCAGCCGTCCCTCCG;ACTGTTTATTAAGCAGATGG	-2.07;-0.41;1.97;2.78	19077;38593;76239;77257	3.75E-01;4.26E-01;1.23E+00;4.13E-03	185;1203;38849;58365	2.02E+00;2.85E+00;5.99E-01;4.91E-01
OR5AK2	0.567714	1.13753	4	TGTAAAACCTGTTTGTACAG;GATACACCAAAACTCATGCT;ACATGATTACAGTATAGTGA;GCATGAAAGAGCAAGAATAG	0.27;0.33;0.53;1.14	54072;55302;59790;70374	1.11E+00;6.02E-01;3.77E-01;1.66E-01	7068;17652;22140;23370	5.62E-01;7.31E-01;1.18E+00;2.08E+00
DCAF8	0.567458	1.07064	4	TGGTGTGGGATTGGGTACGG;GCTACACTTACGACGCTGGG;CGCACCAGCACAGAAAGTCG;TGTATTCTTGCAACACTGTG	-0.18;0.48;0.63;1.34	43171;58682;61959;72612	7.14E-01;6.94E-01;3.88E-01;1.12E-01	4830;15483;18760;34271	6.87E-01;8.14E-01;1.37E+00;1.42E+00
SWAP70	0.567302	1.13031	4	CCTTTCCCATAACCTGTGCA;TTTGATTGGCTAGAAACTGG;TGATGAAAAAGGGCCACAGA;GGATGAAAATTGCTGTGTAG	-1.04;0.64;0.89;1.78	28752;62010;66769;75572	4.33E-01;8.16E-01;4.52E-01;4.24E-02	1870;10673;15432;48690	1.05E+00;1.07E+00;1.60E+00;8.06E-01
FBXO33	0.567205	1.12657	4	GCCGCTCAGATAGTTCTCGG;CAGTAAACTGAGGTGCTCCA;GCCACAGGGCCGGATAGAAG;AAATACATACCTCAGCAAGG	-0.07;0.56;0.83;0.95	45713;60362;65762;67708	7.89E-01;7.51E-01;4.32E-01;2.33E-01	9734;11680;17080;31729	4.74E-01;1.01E+00;1.48E+00;1.55E+00
CCND2-AS1	0.567015	0.808769	2	ACTCCCATTATAGGTCTGTG;CACTTGAAGTAGGAGCACTG	0.14;1.0	50875;68464	3.46E-01;1.07E-01	8978;26567	6.88E-01;9.29E-01
GNPTG	0.566999	1.77835	5	AGAACTCATACTTGTACCTG;GGTGCTCGGCTCGGACACAT;GCCGAGGCGGGCAGATCACG;TCCCACTGTAGGCGTTCCAG;CGAGAGTCGGAAGAGATGCA	-2.8;0.24;1.75;1.75;1.9	11629;53257;75411;75444;76039	4.07E-01;8.42E-01;2.20E+00;9.35E-01;3.97E-02	1403;1998;2031;24186;65813	1.07E+00;2.21E+00;3.77E+00;1.49E+00;3.53E-01
CBX6	0.566771	1.11926	4	AACCTGAAGGTGATCGACAA;GGGCGGCCAGAAGTAGCCCA;TGTGGCGGATCTGTGTACGC;ACTCGGCAGGTACAGCACTT	0.23;0.29;0.51;1.23	53045;54563;59369;71468	1.07E+00;5.85E-01;3.76E-01;1.39E-01	5974;18073;22879;24397	6.15E-01;7.17E-01;1.14E+00;2.01E+00
SYNDIG1L	0.566395	1.22229	5	CAAGGCAGGCAGATCACCTG;GGTCCCTGGGAGGCAGCGTG;CTCTACTCCTACCTCCTAGG;CAGCTCCTCTTGTACCCCAT;CCATGGCCCCTATCCCTACC	-0.53;0.53;0.59;0.87;1.37	36237;59781;61069;66366;72915	7.27E-01;1.15E+00;6.59E-01;4.14E-01;1.31E-01	4527;11076;16373;17661;41205	6.39E-01;8.90E-01;1.23E+00;1.98E+00;1.37E+00
FCRLA	0.566289	1.03827	4	GAAGGATAGTGCAAAGCAGG;GTTGTGGCTATCACAGTCCA;TGAGGGACCTGTCTGCACTG;GTGGTACAAAAGGCAGACAG	-0.3;0.09;0.79;1.68	40843;49901;64889;75112	6.52E-01;5.02E-01;4.19E-01;5.30E-02	2330;12553;27541;36599	9.59E-01;9.56E-01;9.36E-01;1.30E+00
ISL1	0.565892	1.03848	4	GAAGCGCAAATTCGTCCCCA;TGCGGCATGTTTGAAATGTG;ACACTCGATGTGATACACCT;CGGAGAAGACCACCCGCGTG	-0.26;0.09;0.63;1.81	41453;49908;61777;75721	6.68E-01;5.02E-01;3.86E-01;3.90E-02	1721;15665;27534;35989	1.08E+00;8.06E-01;9.36E-01;1.33E+00
AP1S3	0.565465	1.15596	5	AGAGATTGTGCATCGTTACG;AATAATCTGAACAATTTCCC;TATTGCTCTTCAGTCGACAA;ACTGCTTGTCCTGTGACCAC;GCCGAGGCGGGCAGATCACG	-0.52;0.22;0.42;0.96;1.75	36413;52897;57376;67889;75411	7.32E-01;8.28E-01;5.64E-01;4.39E-01;5.77E-02	2031;9553;20066;24545;41029	9.28E-01;9.89E-01;1.02E+00;1.46E+00;1.38E+00
FAM114A1	0.565191	1.23797	5	AAACAGCATCCCGTAGTGCG;GCTGTCTGCCATCACCAATG;AAAGTGACCCGGGCTTTAAG;TACACCATGAATCCGTAGAG;GCCGAGGCGGGCAGATCACG	-1.04;0.08;0.98;1.06;1.75	28684;49563;68235;69315;75411	5.36E-01;7.19E-01;1.01E+00;4.73E-01;5.77E-02	2031;8127;9207;27880;48758	9.28E-01;1.10E+00;1.88E+00;1.27E+00;1.00E+00
SMAD4	0.564481	1.11542	4	TACGAACGAGTTGTATCACC;TGTCCTTCAGTGGACAACGA;GCAATGGAACACCAATACTC;GGATACGTGGACCCTTCTGG	-0.22;0.68;0.71;1.09	42430;62847;63447;69789	6.94E-01;8.53E-01;4.01E-01;1.81E-01	7653;13995;14595;35012	5.39E-01;8.81E-01;1.66E+00;1.38E+00
IRF4	0.564243	1.10763	4	CTGATCGACCAGATCGACAG;CAGACCCGTACAAAGTGTAC;CTACCGGGAAATCCTCGTGA;CCCATGACGTTTGGACCCCG	0.14;0.17;0.19;1.76	50961;51599;52098;75471	9.78E-01;5.28E-01;3.99E-01;4.48E-02	1971;25344;25843;26481	1.03E+00;5.36E-01;1.00E+00;1.86E+00
CLDN17	0.564047	1.10608	4	GAATTGCATCCGACAAGCCA;AGTGCACAGGCTCTAACGAG;AAAGCTGATACTCTCCACTG;GCCACAGATGCCAATAAGCA	-0.43;0.51;1.07;1.1	38189;59329;69491;69933	5.90E-01;7.15E-01;5.28E-01;1.77E-01	7509;7951;18113;39253	5.44E-01;1.29E+00;1.41E+00;1.18E+00
ZNF528	0.56364	1.06758	4	AACTGAGGAATTGTCACTGA;TTGCAGATGCTCTAAAGACT;TGCGCAGAGGACTTTATACA;AAAATAGCAAACGATCCAGA	-0.48;0.12;1.15;1.46	37247;50577;70469;73654	5.70E-01;5.11E-01;5.66E-01;8.71E-02	3788;6973;26865;40195	7.74E-01;1.39E+00;9.62E-01;1.14E+00
MERTK	0.563139	1.23939	5	CAAGGCAGGCAGATCACCTG;TAGTGGACAACTCTTCACAG;TCAGGCTGCTTAGTAAAGTG;ATGACTGAGCCATTACTCAG;GCTACCGGATATCCCACGTG	-0.53;0.05;1.01;1.06;1.23	36237;48840;68654;69288;71507	7.27E-01;6.98E-01;1.05E+00;4.72E-01;1.73E-01	5935;8154;8788;28602;41205	5.55E-01;1.10E+00;1.94E+00;1.23E+00;1.37E+00
HTR3A	0.563111	1.24491	4	AATGACGTCAATGGATACGG;GATGCCGAATATACACGTAC;AGGAGTGTCTTCATGAACCA;CCCAGGTGGTCATCCGCCGG	0.37;0.59;0.63;0.66	56252;61072;61893;62422	1.23E+00;7.78E-01;3.87E-01;3.75E-01	15020;15549;16370;21189	3.91E-01;8.11E-01;1.53E+00;2.25E+00
HGFAC	0.563094	1.28792	4	CACAACTCACAACTACGACC;GGAATCCGGACAATGACGAG;AGCACTCGCACTGTTCCACG;GAGGAGCCGCCGATGATACG	0.52;0.53;0.59;0.61	59617;59802;61077;61384	1.43E+00;7.31E-01;3.82E-01;4.04E-01	16058;16365;17640;17825	3.84E-01;7.78E-01;1.44E+00;2.55E+00
PPIG	0.562927	1.52004	7	TCGCCCAAGCTAGAGTGCAG;TCCTGCCTCAGCCTCCCGAG;GTGGTGAAAGATGGATCAAG;TCTGGACGGACAGTAGACTG;AGCTAGCAAACCGTTTGCGG;GGAATCAGAGGAATCAGAAG;GCCGAGGCGGGCAGATCACG	-1.41;-0.4;0.14;1.08;1.18;1.6;1.75	24742;38719;50963;69559;70878;74640;75411	6.53E-01;7.85E-01;8.65E-01;1.62E+00;1.01E+00;6.93E-01;8.08E-02	2031;2802;6564;7883;26479;38723;52705	8.05E-01;1.64E+00;1.83E+00;2.57E+00;1.37E+00;1.26E+00;1.17E+00
ZNF302	0.562885	1.13368	4	ATATGTGATCATGTTATTGG;AAAAGTGAGAGAATAAATGG;GTCGTGTAAGGGATGAACCA;TTCACCCCAACCAGTAACAA	0.19;0.46;0.54;1.07	52004;58195;59983;69478	1.02E+00;6.79E-01;3.78E-01;1.88E-01	7964;17459;19247;25438	5.27E-01;7.38E-01;1.34E+00;1.93E+00
HSP90AA1	0.562788	1.15114	5	GATCAAAAGGAGCACGTCGT;TCTCACGGGATATGTTTAGA;GATCTGTCAAGCTTTCATAC;CAGTGAGGACAGACACAGGT;GCCGAGGCGGGCAGATCACG	-0.19;0.0;0.2;1.06;1.75	42971;47578;52271;69371;75411	9.63E-01;6.65E-01;4.88E-01;4.74E-01;5.77E-02	2031;8071;25171;30099;34471	9.28E-01;1.11E+00;8.06E-01;1.16E+00;1.76E+00
NRIP1	0.562198	1.09358	4	TCAATACACAAAATTATGCA;AGCAACACTAGGTTTAGGTG;GAAGAAGGAATGATACCCAT;TGGATCCCAAGTGTTTAGCA	-0.05;0.3;0.94;1.05	46257;54631;67615;69255	8.07E-01;5.87E-01;4.71E-01;1.94E-01	8187;9827;22811;31185	5.19E-01;1.13E+00;1.14E+00;1.58E+00
C2orf80	0.561733	1.05982	4	ATTATATTGGCATCAGACTT;GGAAGTCTTTAAAATTTATG;AGGCAGAGAGATGAAACTCG;ATTAGGAAAATACCACTCCA	-0.0;0.15;0.76;1.34	47236;51251;64356;72615	8.39E-01;5.22E-01;4.11E-01;1.12E-01	4827;13086;26191;30206	6.87E-01;9.27E-01;9.90E-01;1.64E+00
ACIN1	0.56154	1.15287	5	TGAGGGACAAAAATCTAGGG;CGTACTCATGCCAACCCTCG;CCTGGTCAAGCGGCTCAAAG;GAGGAATTAGCACTGGCCAA;GCCGAGGCGGGCAGATCACG	-0.62;0.09;0.48;1.12;1.75	34722;49750;58676;70105;75411	6.83E-01;7.24E-01;5.93E-01;4.97E-01;5.77E-02	2031;7337;18766;27692;42720	9.28E-01;1.18E+00;1.09E+00;1.28E+00;1.29E+00
SH2D1A	0.561155	1.11732	4	GTATCATGGCAAAATCAGCA;ACACATAGGCAGTACACGCC;GGATGGCAGCTATTTGCTGA;ATAGCTGCCATCCAGCCCAG	-0.68;0.7;0.92;1.29	33817;63378;67310;72134	5.06E-01;8.78E-01;4.64E-01;1.23E-01	5308;10132;14064;43625	6.54E-01;1.11E+00;1.71E+00;9.97E-01
AKAP8L	0.56029	1.1602	5	CCTGGAACATGCCGTACTCG;CATGCGGAACTGGTCGCGGT;AGGATAACACCACCAACTAT;AAGGAACACTTTAAGTACGT;GCCGAGGCGGGCAGATCACG	-0.24;0.22;0.39;0.68;1.75	42075;52822;56807;62815;75411	9.28E-01;8.25E-01;5.52E-01;3.88E-01;5.77E-02	2031;14627;20635;24620;35367	9.28E-01;7.20E-01;9.92E-01;1.46E+00;1.70E+00
CCL3L1	0.56	1.18167	5	ATTCTGTGGAATCTGTCGGG;TGGACTCACGTGGTGCAGAG;AGCCATGGTGCAGAGGAGGA;GAGGACGGCAAGGGCAGCAG;GAACTGGTTGCAGAGAGCCA	-0.07;0.14;0.21;1.05;1.46	45851;50870;52700;69262;73675	1.09E+00;7.59E-01;4.93E-01;4.71E-01;1.08E-01	3767;8180;24742;26572;31591	7.01E-01;1.10E+00;8.21E-01;1.34E+00;1.95E+00
CCL3L3	0.56	1.18167	5	ATTCTGTGGAATCTGTCGGG;TGGACTCACGTGGTGCAGAG;AGCCATGGTGCAGAGGAGGA;GAGGACGGCAAGGGCAGCAG;GAACTGGTTGCAGAGAGCCA	-0.07;0.14;0.21;1.05;1.46	45851;50870;52700;69262;73675	1.09E+00;7.59E-01;4.93E-01;4.71E-01;1.08E-01	3767;8180;24742;26572;31591	7.01E-01;1.10E+00;8.21E-01;1.34E+00;1.95E+00
GPX1	0.55994	1.21162	4	GCTCGAACCCACCACCAGGC;AAGTAGTACCTTGCCCCGCA;GGCGTCCCTCTGAGGCACCA;CATGCTCTTCGAGAAGTGCG	0.32;0.53;0.66;0.73	55179;59891;62402;63790	1.17E+00;7.34E-01;3.91E-01;3.37E-01	13652;15040;17551;22263	4.04E-01;8.33E-01;1.44E+00;2.17E+00
BNIP3P12	0.559827	0.990152	3	AAAGGGTGAACACCAGTGAA;AAAGTCTTTAAATCTCACTC;GTATAGTAAGTAGTGAGCAG	-0.52;1.01;1.19	36439;68627;71015	4.03E-01;5.72E-01;1.13E-01	6427;8815;41003	6.79E-01;1.46E+00;8.28E-01
SAG	0.558976	1.16742	5	TTTCTAGATCTATTTCCATG;CAAGGCAGGCAGATCACCTG;TTTGCGGATCAGTAATCGCA;TGATTATTACGTCAAGCCCG;GGCAAGTAGTCAGGAAACTG	-0.78;-0.53;0.66;0.83;2.61	32269;36237;62469;65746;77167	6.18E-01;4.82E-01;7.07E-01;4.06E-01;7.70E-03	275;11696;14973;41205;45173	1.76E+00;8.55E-01;1.33E+00;7.27E-01;1.17E+00
NT5DC2	0.558879	1.11282	4	TCTACAAGGACGTGACGGTG;CTCGATCAGGATGTCACGGG;AGACCACAGCATCTCACGAG;TTGGCGCCAGCTCTTCGATG	-0.2;0.63;0.79;1.01	42928;61854;65046;68605	7.07E-01;8.09E-01;4.21E-01;2.10E-01	8837;12396;15588;34514	4.98E-01;9.65E-01;1.58E+00;1.40E+00
GBX1	0.558611	1.04052	4	GCCCCGCTAGCCTCTTTCGC;GGCCCGTAGAAAGCGTCGGG;CGGCCCGATTAGGGAGTCGA;GGAAAAGTCTCTGAGAAGTG	-0.29;0.36;0.65;1.51	40924;55957;62352;74060	6.54E-01;6.18E-01;3.91E-01;7.76E-02	3382;15090;21485;36518	8.16E-01;8.31E-01;1.21E+00;1.31E+00
INTS6L	0.558571	1.15088	4	AACGAATACTAGCATCAGTG;CATTGGCTCACAATCTACAC;GCTTATGATATTCCCCGTAG;GCTTCTGGACTGACTACTCT	-0.13;0.7;0.82;0.85	44401;63281;65445;65995	7.49E-01;8.73E-01;4.27E-01;2.78E-01	11447;11997;14161;33041	4.37E-01;9.88E-01;1.70E+00;1.48E+00
CABP7	0.558114	1.13796	4	ACTGGGTTACATGCCCAACG;ACGGCGGCGTTGATGTACCG;AAGTCCACTTGACCATCACC;CCAGAAGACAGTATCAAAGT	0.16;0.42;0.75;0.91	51310;57351;64225;67061	9.92E-01;6.55E-01;4.10E-01;2.50E-01	10381;13217;20091;26132	4.58E-01;9.20E-01;1.29E+00;1.89E+00
NID2	0.557663	1.04259	4	GGACCTGCATGCGTATATCG;AGTCGAGGGACGTATGAGGT;GTGCTGTTGTGTCACACATG;AGGGGGCTGAACTTACGTAG	-0.3;0.3;0.43;1.79	40816;54794;57647;75616	6.52E-01;5.90E-01;3.75E-01;4.14E-02	1826;19795;22648;36626	1.06E+00;6.63E-01;1.15E+00;1.30E+00
COLCA2	0.557458	1.24118	4	ATGGTGTGGAGCACTTTGTG;GGGCGTGTGAGGACAAGTGT;CTGGTTAAAGCAGAAAGGGG;TTCTGGTGTCCAGAGAAGCA	-1.13;1.0;1.05;1.3	27701;68502;69268;72214	4.21E-01;1.20E+00;5.20E-01;1.21E-01	5228;8174;8940;49741	6.60E-01;1.27E+00;2.26E+00;7.69E-01
LHFPL6	0.556722	1.25534	6	CAAGGCAGGCAGATCACCTG;CGGAAACACAGCAACCCATG;AGGATCTGCACCATAGTGAC;AGGATATGAGCACCTCCGGA;AGGCATAAAGAACCCCACGC;GCCGAGGCGGGCAGATCACG	-0.53;0.11;0.32;0.61;1.08;1.75	36237;50364;55080;61516;69608;75411	9.22E-01;1.02E+00;7.61E-01;5.98E-01;4.48E-01;6.92E-02	2031;7834;15926;22362;27078;41205	8.61E-01;9.99E-01;1.06E+00;1.28E+00;1.69E+00;1.64E+00
FNDC7	0.556626	1.14414	5	AACACGGGGTTAATGTCACT;ACGATCCAAGAAGATCCCCC;AGAGCCGAAAGGGTGCACGC;CACAGTCATTGAAACCACGG;GCCGAGGCGGGCAGATCACG	-0.27;0.08;0.23;1.0;1.75	41348;49483;53000;68529;75411	9.00E-01;7.16E-01;4.96E-01;4.52E-01;5.77E-02	2031;8913;24442;27959;36094	9.28E-01;1.04E+00;8.32E-01;1.27E+00;1.66E+00
COLGALT1	0.55657	1.06152	4	AGGCACAGGAGATCGAGTGC;GATGTATGTGTGCAACAAGG;GGTGGCTACGGACCACAACA;ATCCGCAAGCGAGACCGCCG	0.01;0.21;0.51;1.49	48064;52662;59315;73889	8.68E-01;5.47E-01;3.76E-01;8.16E-02	3553;18127;24780;29379	7.97E-01;7.15E-01;1.05E+00;1.68E+00
DBNL	0.556239	1.15689	4	GCGAGGGCGTGAACGATGTG;AGAAGTCCCCGACCGACTGG;CAGCGCTATCAGGAGCAGGG;CCATGTGACCATCAACGCAC	-0.99;0.12;1.5;1.59	29259;50578;73969;74604	4.39E-01;5.11E-01;8.06E-01;6.48E-02	2838;3473;26864;48183	8.83E-01;1.96E+00;9.62E-01;8.24E-01
NTF4	0.556184	1.1797	4	GCGCCCACGCAAGTCCACAG;CAGTTTCGCTCACCCCACGC;CCCTAGACAGGACTACTCGG;GGGACTCAATTGGCACACTG	0.32;0.45;0.61;0.84	55119;58109;61424;65921	1.17E+00;6.77E-01;3.84E-01;2.80E-01	11521;16018;19333;22323	4.35E-01;7.92E-01;1.33E+00;2.16E+00
C12orf74	0.555848	1.0828	4	GAGGTGCCACCCCAAGACTG;TTCCTGGCAGGCTCTTCGAA;AGGAGCCTGCCAAAGAACCA;TTGAGGAGATTAAGGACCCG	0.01;0.25;0.83;1.13	48045;53400;65779;70252	8.67E-01;5.61E-01;4.33E-01;1.69E-01	7190;11663;24042;29397	5.57E-01;1.01E+00;1.08E+00;1.68E+00
ZC3H14	0.555775	1.03921	4	TGCCTGCAAAGCCTGAAAGG;ATATTCTAGGAACTCAACAG;AACAAGAGCAATTTCAGTCG;TGTGTTGTTCCCTAGAAACA	-0.11;-0.02;0.5;1.86	44700;46815;59119;75911	7.58E-01;4.65E-01;3.76E-01;3.47E-02	1531;18323;30627;32743	1.13E+00;7.08E-01;8.25E-01;1.50E+00
TRIM34	0.555491	1.20692	5	GGTCTTTAACCAGAAGAGAG;TGGCCACAGTCTAGACTCAA;TCATCTCAGATGTGGAGTGT;GTCAAGTTGAGCCCAGACAA;GAGTAACTGATACCACACAC	-1.03;0.34;0.75;0.78;1.93	28855;55593;64311;64803;76121	5.40E-01;9.37E-01;7.83E-01;3.98E-01;3.73E-02	1321;12639;13131;21849;48587	1.10E+00;8.07E-01;1.47E+00;1.64E+00;1.01E+00
ZNF621	0.55547	1.05581	4	GAGTTGCACAGAATGCCAGT;TGGGACACCGAGATTCTGAG;AAAGGCTTTCCGTAGGAGTG;CCAAATCTGATACTTCGAGG	-0.19;0.44;0.65;1.33	43051;57811;62184;72468	7.11E-01;6.68E-01;3.89E-01;1.15E-01	4974;15258;19631;34391	6.77E-01;8.23E-01;1.31E+00;1.41E+00
KLRC3	0.555352	1.07818	4	TTTCTGGGTTCTTGCATTCG;AGAAGAGTTCTTTGAAGCAC;TCCAGAAAAGCTCACTGCCG;AATGCTTCTCTGAATCATCA	-0.34;0.39;1.03;1.14	39882;56663;68963;70417	6.29E-01;6.36E-01;5.10E-01;1.65E-01	7025;8479;20779;37560	5.64E-01;1.24E+00;1.25E+00;1.26E+00
LACTB	0.554974	1.03445	4	TCGTCAGCATATCCAAGTCA;TCTCTGGTTTACATGGTACA;AAATGCCGGAATTCAAAACC;CTTCGGTCTTAGGATGAGGT	-0.13;0.0;0.75;1.59	44453;47359;64286;74585	7.51E-01;4.70E-01;4.10E-01;6.53E-02	2857;13156;29832;32989	8.80E-01;9.23E-01;8.52E-01;1.48E+00
PDZD11	0.554484	1.06831	4	AGGCAGGCAAGAAAACCACC;ACTCATTGTTGTAGTCCGGG;TTGGGATTTAACATCCGAGG;GATGGTTCGGGGCAGAAACT	0.04;0.22;0.38;1.58	48588;52886;56548;74473	8.87E-01;5.51E-01;3.77E-01;6.79E-02	2969;20894;24556;28854	8.65E-01;6.33E-01;1.06E+00;1.72E+00
NPHS2	0.554327	1.04295	4	TGCCATTTGCTACTACCGAA;TGAGGTCCGAGGCTCCGGCG;GAGCATCGCCCAAGATGCAA;AGAGTAATTATATTCCGACT	-0.32;-0.23;0.61;2.16	40259;42295;61449;76674	6.38E-01;4.33E-01;3.84E-01;1.73E-02	768;15993;35147;37183	1.41E+00;7.93E-01;6.90E-01;1.27E+00
OR2A12	0.554241	1.09562	4	TAATGAGGGTGTATTGCAAG;CATCTTAGGGACAGTACTCG;TGGGAAATGGGATTATCCTG;AACCCGCAAATAGGACCACC	-0.6;0.1;1.33;1.38	35041;50156;72544;72969	5.27E-01;5.05E-01;6.82E-01;1.03E-01	4473;4898;27286;42401	7.14E-01;1.68E+00;9.46E-01;1.05E+00
PHKG2	0.553869	1.32786	6	TGGGGTCCCACACAACTCTG;GGCGGCAGAAAATGAGCGCG;GGAACGGTCATCCCACTCGG;AAGACTCGTAGGAATCGATG;TTCCAGCAGAGACCGCATGA;AGCAACCCCCTTGGGCAACG	-0.7;0.08;0.67;0.69;1.28;1.3	33467;49637;62679;63064;72044;72189	8.15E-01;9.90E-01;1.13E+00;6.43E-01;5.36E-01;1.83E-01	5253;5398;14378;14763;27805;43975	5.43E-01;1.26E+00;1.16E+00;1.89E+00;1.64E+00;1.47E+00
SDR9C7	0.553505	1.0513	4	CAAGAGCGAAAGCATCAAGG;CACACCAGCATTGTTCACCA;TCCCAACGAATGGCTGACCA;GGTGGTCTGCAGCCGATAGG	-0.37;-0.02;0.29;2.32	39299;46862;54397;76906	6.15E-01;4.65E-01;3.85E-01;1.20E-02	536;23045;30580;38143	1.57E+00;5.81E-01;8.27E-01;1.23E+00
TMEM225	0.552891	1.03801	4	GATAGGTGAATTTCATACCC;GCAGGGCAACACATCATCCA;GTAAGCAGTATACATGATCC;CATTAAGACTACGGCCCAGG	-0.6;0.2;0.91;1.7	35138;52386;67108;75163	5.29E-01;5.42E-01;4.59E-01;5.19E-02	2279;10334;25056;42304	9.68E-01;1.10E+00;1.04E+00;1.05E+00
VPS13C	0.552841	1.54645	4	AGAAAGGTTGCACTGAAACG;TTCATACCAATGGTCGACGA;TAAATTTGAAACCAATCCGG;GAGAACATTTGACTTAACTG	-2.67;-0.27;1.95;3.2	13183;41316;76171;77363	4.10E-01;4.30E-01;1.20E+00;1.75E-03	79;1271;36126;64237	2.39E+00;2.81E+00;6.64E-01;3.25E-01
LRRTM4	0.552014	1.37868	7	CAAGGCAGGCAGATCACCTG;GGAAAGCACCATGATATGTG;AAAAACTCTGGGAAATGACT;ATTGTAAGTAAATTGAGCGG;GTAGGTCTAGGGATAATCAG;GCCGAGGCGGGCAGATCACG;TTATCAGGGAATGACATCCA	-0.53;-0.01;0.12;0.22;0.24;1.75;2.08	36237;47083;50618;52784;53338;75411;76510	1.13E+00;1.14E+00;8.52E-01;6.13E-01;5.01E-01;8.06E-01;3.68E-02	932;2031;24104;24658;26824;30359;41205	1.11E+00;1.90E+00;6.24E-01;9.43E-01;1.35E+00;1.81E+00;1.92E+00
TCAF2P1	0.551947	0.962543	3	AGGCCATGCTCCGATAGGAG;GAGATCAATGGAATCAACCC;GAGAAGCTACCACTTCCGCA	-0.66;0.83;1.49	34030;65730;73859	3.83E-01;4.86E-01;6.17E-02	3583;11712;43412	8.99E-01;1.23E+00;7.54E-01
TMEM47	0.551501	1.06244	4	ATTCTCATTGCATTCCTGGT;CTATCTGCGTGGGATCTCGA;ACTCTGGCTTTACTCCTGGG;CAGCCCGACCAGCTTCAAGG	-0.37;0.52;0.78;1.28	39263;59609;64771;72013	6.14E-01;7.25E-01;4.17E-01;1.26E-01	5429;12671;17833;38179	6.47E-01;9.49E-01;1.42E+00;1.23E+00
FOPNL	0.550486	1.65489	5	TGGTCAACCTGTAGTTCCGT;TTTCATGAGACAATGATGGT;GGGCATTGAAAACTTCAGCT;GGACACCTTGGAAAAAAAGG;GCCGAGGCGGGCAGATCACG	-2.44;1.08;1.14;1.23;1.75	15614;69658;70338;71409;75411	3.88E-01;2.09E+00;1.20E+00;5.50E-01;5.77E-02	2031;6033;7104;7784;61828	9.28E-01;1.32E+00;2.20E+00;3.34E+00;4.89E-01
FTHL17	0.550264	1.08045	4	TGTAGAGCTCCAGCGTGATG;CTACTTCAACCGGGACGACG;CTGGCTTCCTGATATCGTGA;CCGACAGGCGCAGGAAGTAG	-0.17;0.49;0.81;1.07	43489;58971;65272;69499	7.23E-01;7.04E-01;4.24E-01;1.88E-01	7943;12170;18471;33953	5.28E-01;9.78E-01;1.38E+00;1.43E+00
SLC9A3R1	0.550127	1.13307	4	GGCCCAGGATCGCATTGTGG;AGGTTGAAGCCATAGCCACT;CAACGAAAATGAGCCTCGCG;GGAGGTGAACGGCGAAAACG	-0.62;0.82;0.84;1.16	34702;65532;65932;70608	5.21E-01;9.93E-01;4.35E-01;1.60E-01	6834;11510;11910;42740	5.73E-01;1.02E+00;1.91E+00;1.03E+00
KLHL30	0.54977	1.06512	4	ACTTCCCCGACTATCACAAG;CCGCACCAACCACGCCAGCG;GGCCGGCTGACCATCACGCA;GCCCACCAGCAGTGTGACGT	-0.75;0.43;0.98;1.54	32715;57517;68131;74252	4.87E-01;6.59E-01;4.85E-01;7.31E-02	3190;9311;19925;44727	8.38E-01;1.17E+00;1.30E+00;9.54E-01
LANCL1-AS1	0.549202	0.822013	2	GCCATGTGCTAACTGTAGGT;TGGTACCATTCATACATCAG	0.32;0.78	55148;64761	3.87E-01;1.55E-01	12681;22294	5.62E-01;1.08E+00
HMGB3	0.549162	1.07155	4	CTGCACAAAGAAGGCATAAG;AACAGGAAGAATCCAGACCT;AAAATTCCGCAAAATTGACA;GAAGTGCTCTGAGAGGTGGA	-0.77;0.59;0.69;1.69	32296;60977;63125;75140	4.81E-01;7.74E-01;3.97E-01;5.24E-02	2302;14317;16465;45146	9.64E-01;8.66E-01;1.52E+00;9.37E-01
RSPH1	0.548703	1.08602	4	TCATTACCCAGGAATATGAG;GAGGGCACGGCTACCCAACG;GCAAGGCACCTATTTATACG;TGGGCAAATGACCTGCGGCA	-0.5;0.4;1.14;1.15	36745;57001;70423;70553	5.60E-01;6.45E-01;5.64E-01;1.62E-01	6889;7019;20441;40697	5.70E-01;1.39E+00;1.27E+00;1.12E+00
CALHM3	0.547863	1.04567	4	CGAAGCACTTCCCGTCAAGG;AGGCAGTGTCTCGCTACCTG;CATCACCACAGACTGCCGGT;CAGATACTGGAGCAACTACG	-0.49;0.26;0.33;2.1	36906;53695;55257;76568	5.63E-01;5.67E-01;3.81E-01;1.97E-02	874;22185;23747;40536	1.36E+00;6.01E-01;1.10E+00;1.12E+00
KCTD9	0.547021	1.12989	4	GTTCGAAGTACTCAGGACTT;TTGCATGTGCAAGATTACAG;GTACTTTACAACTACACGGT;AATCCTAACAATCCCTCAGG	-0.37;0.71;0.92;0.93	39230;63521;67255;67409	6.14E-01;8.85E-01;4.63E-01;2.41E-01	10033;10187;13921;38212	4.66E-01;1.11E+00;1.72E+00;1.23E+00
YBEY	0.546782	1.18209	5	CAAGGCAGGCAGATCACCTG;GAGTGCAGAAATTTGACCTG;GTCATCTGGAAAATCAGGCT;TGCAGCGAGTCATCCCCATC;GTAAGATCGAGATTGTAAGG	-0.53;0.1;0.79;1.08;1.31	36237;49968;64935;69542;72287	7.27E-01;7.31E-01;8.13E-01;4.79E-01;1.50E-01	5156;7900;12507;27474;41205	5.97E-01;1.12E+00;1.53E+00;1.29E+00;1.37E+00
TMEM80	0.546255	1.05022	4	GAGCGTGGCGAGGAAATACA;CCCGAGCTCACCTCGCCGCG;GAAACAGCAGAGCAAGATCG;AGAGGCTGCCGGGATCGCGA	-0.36;0.02;0.27;2.25	39481;48243;53985;76837	6.19E-01;4.80E-01;3.87E-01;1.36E-02	605;23457;29199;37961	1.52E+00;5.73E-01;8.74E-01;1.24E+00
LAMC1	0.545935	1.27032	6	CAAGGCAGGCAGATCACCTG;TGCCATTTACAAGCGCACAC;CTGGAATCATCTAATCCTCG;TGACCTCTATCAAGATACGT;GCAGCTGTAACCCCGTGACG;GCCGAGGCGGGCAGATCACG	-0.53;-0.3;-0.05;0.68;1.73;1.75	36237;40804;46228;62853;75316;75411	9.22E-01;6.81E-01;5.55E-01;6.36E-01;8.44E-01;6.92E-02	2031;2126;14589;31214;36638;41205	8.61E-01;2.00E+00;1.15E+00;8.51E-01;1.13E+00;1.64E+00
DUSP28	0.545816	1.17021	4	GTTCTTGCAGTAGACTAGGC;TCAGCCGGGTCGTCGAACAC;GCGACGCGCACCAACGGTGG;GAGGTACGCGGTGCAGACGG	0.25;0.52;0.61;0.8	53446;59675;61484;65115	1.09E+00;7.27E-01;3.85E-01;3.01E-01	12327;15958;17767;23996	4.22E-01;7.94E-01;1.43E+00;2.04E+00
PPP3R1	0.545339	1.10528	4	TGCTTTCCGTATCTATGACA;CAGTGTGAGCACATTTCCAA;AGATGGCTATATTTCCAATG;AAAGGATTCTGTTGTAACTC	0.23;0.3;0.43;1.22	53109;54596;57683;71287	1.07E+00;5.86E-01;3.75E-01;1.44E-01	6155;19759;22846;24333	6.06E-01;6.64E-01;1.14E+00;2.01E+00
PSMC4	0.545266	1.19851	4	GATCAGAATACAGCCATCGT;GTGATGTACGCGGACATCGG;TGGCTGTGGGAAGACCATGT;GCATTTCGAGCTCTACAAGC	-1.27;0.72;1.27;1.47	26089;63584;71879;73727	4.06E-01;8.88E-01;6.39E-01;8.54E-02	3715;5563;13858;51353	7.81E-01;1.57E+00;1.73E+00;7.14E-01
NAP1L2	0.54522	1.18317	4	AAAGAAGAGGAGGATCCTAA;AAAAGGTGGCGATACTGATG;GGTAATCAGATAATGGTGGA;AAATTCTAGTGTGAAACTGA	-1.69;0.24;0.97;2.65	22255;53345;68094;77192	3.81E-01;5.60E-01;4.84E-01;5.59E-03	250;9348;24097;55187	1.89E+00;1.17E+00;1.08E+00;5.89E-01
MMP14	0.544971	1.28299	4	CTGCCCGATGATGACCGCCG;TGACGGGAACTTTGACACCG;GGCACCTCGCGGAAGCGCAG;CCATCAACACTGCCTACGAG	-1.11;-0.54;1.8;2.03	27914;36078;75655;76415	4.23E-01;4.30E-01;1.07E+00;2.32E-02	1027;1787;41364;49528	1.29E+00;2.52E+00;5.47E-01;7.76E-01
SLC25A24	0.544695	1.15342	5	CCAGGCACTGGACCGCAATG;CCGTCTGAAAATCATGATGC;AAAAAAAATCCGGACAATGG;GGTATCCGCTCGCTTTGGAG;GCCGAGGCGGGCAGATCACG	-0.47;-0.39;0.72;1.11;1.75	37333;38979;63713;70054;75411	7.61E-01;5.08E-01;7.57E-01;4.96E-01;5.77E-02	2031;7388;13729;38463;40109	9.28E-01;1.17E+00;1.42E+00;8.15E-01;1.43E+00
CACNA1C	0.54448	1.33038	5	AGATCGTGTCATTGACAATG;CATTAGACTTGACTGCGGCG;GATGGGGCAAACGCTCTCGG;TGTTGATATAGCAATCACCG;GCCGAGGCGGGCAGATCACG	-1.53;-0.09;1.13;1.46;1.75	23650;45318;70235;73676;75411	4.49E-01;6.12E-01;1.19E+00;7.01E-01;5.77E-02	2031;3766;7207;32124;53792	9.28E-01;1.69E+00;2.18E+00;1.06E+00;7.91E-01
COL4A5	0.54445	1.52053	6	AAAAAACTTACAAGTCCAGG;CAAGGCAGGCAGATCACCTG;GTCAGACTATAACCCAGCCG;TGGAAAACCCATATCACCGA;GCCGAGGCGGGCAGATCACG;GATGACATAATTATACTACC	-2.13;-0.53;0.4;1.43;1.75;2.34	18576;36237;57016;73444;75411;76934	4.37E-01;5.80E-01;8.34E-01;1.49E+00;8.61E-01;1.71E-02	508;2031;3998;20426;41205;58866	1.42E+00;2.03E+00;2.63E+00;1.41E+00;9.22E-01;7.15E-01
LOC100131078	0.54399	0.649546	1	TTTGAGTGCAAGTATCTGGA	0.54	60087	0.11	17355	0.65
PEX11B	0.543836	1.06453	4	TCTCCACAAGTTCTACGCCT;CACTTCTCCTGATCCACACG;CGAAGTACAAGGCTCGATTG;GGCGAATCTCATAAGCATCA	0.0;0.07;0.25;1.86	47369;49237;53420;75918	8.44E-01;4.93E-01;3.90E-01;3.45E-02	1524;24022;28205;29842	1.13E+00;5.61E-01;9.11E-01;1.66E+00
AGTRAP	0.543816	1.01673	4	CTCCATCGACGCCATAAGCA;GCCTGCTGTGAACCTGAAGG;GTGTCCGTGAGGCTGACCCG;TGGCCATGCCCACGCCAAAG	-0.38;0.17;0.74;1.64	39122;51731;64058;74889	6.11E-01;5.30E-01;4.08E-01;5.82E-02	2553;13384;25711;38320	9.24E-01;9.11E-01;1.01E+00;1.22E+00
MB21D2	0.543574	1.23842	6	CAAGGCAGGCAGATCACCTG;ACCCCAGCGAGGGATGCCAA;GTAAGAAGGACAATGAATGG;AACCAGTCAGCCACTTTGGT;CCATATCATAGTCAGTACCC;GCCGAGGCGGGCAGATCACG	-0.53;-0.12;0.05;0.67;1.45;1.75	36237;44628;48800;62680;73558;75411	9.22E-01;7.94E-01;5.97E-01;6.31E-01;6.33E-01;6.92E-02	2031;3884;14762;28642;32814;41205	8.61E-01;1.51E+00;1.13E+00;9.53E-01;1.33E+00;1.64E+00
TMEM132A	0.543269	1.69982	4	AGGAACTCAGACAGTTCAAG;CCCCGTGCGCCTTGTCACTG;TCGGTGAGCTCGATACGCAG;CCTGCTGAGTGGCAAAAGGT	-3.47;1.19;1.35;3.11	4422;70959;72656;77352	7.18E-01;1.45E+00;6.90E-01;2.00E-03	90;4786;6483;73020	2.33E+00;1.70E+00;2.67E+00;1.02E-01
C20orf141	0.542636	1.13743	4	TTACCTATGGAGCAGGTCAA;ACCCAGACCCGAAGCACGTG;CAGCGCAAACTTCTCACCAG;GGGCCCCAGGTGGATACAGG	-1.33;-0.23;0.97;2.77	25497;42154;67977;77251	4.01E-01;4.33E-01;4.81E-01;4.27E-03	191;9465;35288;51945	2.01E+00;1.16E+00;6.86E-01;6.94E-01
OR56B4	0.542326	1.05255	4	TCTGAGCAAAACACATGGGG;GATTACCAGGCATTCATGAG;AGACCCATGCTAGCATCAGT;CCTGAGCATGATGAACCCTG	-0.38;-0.18;1.16;1.57	39126;43252;70601;74446	6.11E-01;4.38E-01;5.72E-01;6.85E-02	2996;6841;34190;38316	8.62E-01;1.41E+00;7.16E-01;1.22E+00
KIAA1024	0.542052	1.07012	4	AGTGGGCCCAAAATATGTAG;GGACGACTGTATCACTCCCG;ACTTGGACGACTGCCTGATG;TTTCAATAGAAATCCCTCCG	-0.29;-0.22;0.18;2.49	40902;42509;51946;77090	6.54E-01;4.34E-01;4.01E-01;7.89E-03	352;25496;34933;36540	1.75E+00;5.34E-01;6.96E-01;1.30E+00
PRSS41	0.54175	1.1047	4	GGCACTACTATCCCTCCGAG;TGGGGGTTAATCAGCCCCAG;GACACAAGAAGTGACCCTCG;GTAAAACCCCAAGTGCGTCA	0.2;0.33;0.55;1.09	52336;55455;60110;69729	1.04E+00;6.06E-01;3.78E-01;1.82E-01	7713;17332;21987;25106	5.36E-01;7.42E-01;1.18E+00;1.96E+00
SH3GLB2	0.541609	1.06429	4	GTGGATAAAATCCCTCTCCG;GCCGAGAGAATGTAATTACG;TGGACAGGAAGGTCCCCTCA;TCTGAGACTTGACGAACTCG	-0.45;0.58;0.8;1.23	37789;60801;65161;71493	5.82E-01;7.68E-01;4.23E-01;1.39E-01	5949;12281;16641;39653	6.17E-01;9.71E-01;1.51E+00;1.16E+00
SOCS6	0.541504	1.03299	4	TGATGGGTACGCTAAAAAGG;GCGCATACTTTCAGCCACGT;ATCACTACAGTCCCGCGCCG;GGCATAAGTCCAATAACGAC	-0.02;-0.0;0.74;1.45	46854;47224;64046;73599	8.26E-01;4.69E-01;4.07E-01;8.84E-02	3843;13396;30218;30588	7.69E-01;9.11E-01;8.39E-01;1.61E+00
NTM	0.539269	1.16716	5	CAACCACCCAAAGACCTCTA;TGGAGACACATCTCTCCCAA;CAGCATCGAGATCCAGAACG;TACTCTCCGTACCACGGGCG;GCCGAGGCGGGCAGATCACG	-0.68;-0.33;0.87;1.09;1.75	33793;40146;66340;69743;75411	6.57E-01;5.23E-01;8.89E-01;4.85E-01;5.77E-02	2031;7699;11102;37296;43649	9.28E-01;1.14E+00;1.67E+00;8.56E-01;1.25E+00
ZFP69B	0.53909	1.11623	4	GATCGTAAATATGACACACC;TCACCGGAATCTGTACCGGG;AGAACCAAAGAATGGGTAAG;TCGTGGGAAGAACTACATTG	-1.02;-0.25;1.24;2.19	28982;41665;71601;76723	4.36E-01;4.31E-01;6.23E-01;1.62E-02	719;5841;35777;48460	1.44E+00;1.53E+00;6.73E-01;8.14E-01
LPGAT1	0.538944	1.12682	5	CAAGGCAGGCAGATCACCTG;GAAGAGGCGAGAAACAAGTC;TGTAGGATGGAATAGCAACC;TGTTACTCTGCCAAGGTCTG;AAGCGGTTCTGGTATATCGA	-0.53;-0.53;0.45;0.84;2.47	36237;36344;57985;65926;77061	7.27E-01;4.83E-01;5.77E-01;4.08E-01;1.07E-02	381;11516;19457;41098;41205	1.62E+00;8.65E-01;1.05E+00;7.30E-01;1.37E+00
C11orf24	0.538776	1.021	4	AGTTGATAATAAAACGTCTG;TGCAGCCTCCAGTATGACTG;CGCTACAGTCTGAGCACGTG;GGAGGCCGCAGTCGTAATGG	-0.45;0.17;0.9;1.53	37692;51748;66960;74182	5.80E-01;5.30E-01;4.56E-01;7.47E-02	3260;10482;25694;39750	8.30E-01;1.09E+00;1.01E+00;1.16E+00
SNX9	0.538475	1.12556	5	CTTACTTCAACGTAGTCTGT;TGGCTGACCCAAACTTAACC;GGCTGCCAGCAACAATCACC;TACCACACAGTCAAAAGTAG;GCCGAGGCGGGCAGATCACG	-0.47;0.04;0.61;0.77;1.75	37401;48578;61370;64626;75411	7.63E-01;6.91E-01;6.69E-01;3.97E-01;5.77E-02	2031;12816;16072;28864;40041	9.28E-01;7.98E-01;1.25E+00;1.22E+00;1.43E+00
ZNF540	0.538149	1.8581	9	GTCATGCCTTATTCAACATG;ACTCACACTTGGTTCAACAT;AAGTTGTGGGTAAAGAGTAA;TATCCGATGAAAAGTAGAAG;GAATTCTAGAATGTACTCTG;CAGCATCAGAGAATTCACAC;GGAGACAATATGGAGTGCAA;GAGATCAGAAGTACGACCAA;AGGGAAAGAGCCCTGCGTGG	-2.99;-0.2;0.22;0.42;0.99;1.17;1.51;1.58;2.13	9537;42862;52832;57331;68329;70779;74047;74537;76635	4.12E-01;1.41E+00;1.56E+00;1.35E+00;1.89E+00;1.51E+00;1.30E+00;6.04E-01;4.09E-02	807;2905;3395;6663;9113;20110;24610;34580;67909	1.06E+00;1.41E+00;2.27E+00;2.36E+00;2.76E+00;1.98E+00;2.26E+00;2.10E+00;5.13E-01
DIO2	0.538075	1.0299	4	ACTGGAGACATGCACCACAC;GGTGGAAGAGTTCTCCTCAG;AGCCGCTCCAAGTCCACTCG;CCTGTTTGTAGGCATCGAGG	-0.13;0.3;0.55;1.44	44358;54576;60233;73468	7.48E-01;5.85E-01;3.79E-01;9.15E-02	3974;17209;22866;33084	7.56E-01;7.47E-01;1.14E+00;1.48E+00
DPY19L1	0.537321	1.05004	4	TATGAGAAGCTTTCACGGAG;TTTATTGTATACCTGTGCAG;TTAATGTATTAATGACAAGG;ATATGTTGGACGGTTACCAG	-0.49;0.35;1.03;1.27	36965;55730;68898;71857	5.64E-01;6.12E-01;5.08E-01;1.30E-01	5585;8544;21712;40477	6.37E-01;1.24E+00;1.20E+00;1.13E+00
TLR7	0.537302	1.11107	4	CAGTCTGTGAAAGGACGCTG;GAAGATTATGTAATGGCGAG;CAGCTACTAGAGATACCGCA;AATGGGGCATTATAACAACG	-0.51;-0.29;1.45;1.5	36709;40888;73585;73941	5.59E-01;4.29E-01;7.67E-01;8.03E-02	3501;3857;36554;40733	8.03E-01;1.87E+00;6.53E-01;1.12E+00
SPNS1	0.536996	1.17023	4	CCTCAGATCTGCCCACCACG;ACGGCCACCACTCCTAGACC;ATTCCTGCTGCGTTCCCGCG;CCGCCACTATGAGAGCCGAA	-1.38;0.77;0.83;1.93	25066;64556;65635;76122	3.97E-01;9.38E-01;4.30E-01;2.98E-02	1320;11807;12886;52376	1.19E+00;9.99E-01;1.81E+00;6.79E-01
SMIM20	0.536929	1.06298	4	GAACAAGCTATAAATCGGGC;ATAGAAGGCGGCGCCGATCA;CCTCCAATCTCATTAGGGGC;GAAGCCGCCGAAAATGAGCG	-0.51;0.2;1.2;1.26	36635;52390;71093;71768	5.58E-01;5.42E-01;5.96E-01;1.32E-01	5674;6349;25052;40807	6.32E-01;1.47E+00;1.04E+00;1.11E+00
ORAI2	0.536827	1.34373	5	CACCTGCATCCTGCCCAATG;AGACGCAGTACCAGTACCCG;GAGTAGGATGCCAAGCACGG;GGCGCCGGGCATCCACGGGG;GCCGAGGCGGGCAGATCACG	-1.53;-0.24;1.13;1.58;1.75	23593;41984;70295;74490;75411	4.48E-01;5.50E-01;1.20E+00;7.88E-01;5.77E-02	2031;2952;7147;35458;53849	9.28E-01;1.89E+00;2.19E+00;9.24E-01;7.89E-01
ALKBH8	0.536756	1.11977	5	AAAGATAAGCCATTATCTGG;TCAGCCACTATTGAACCACT;ATCACCAGCAAACTCCGACG;GAATGTGTATCAATATGAGC;GCCGAGGCGGGCAGATCACG	-0.49;-0.07;0.29;1.2;1.75	37017;45839;54464;71095;75411	7.51E-01;6.23E-01;5.14E-01;5.36E-01;5.77E-02	2031;6347;22978;31603;40425	9.28E-01;1.28E+00;8.89E-01;1.09E+00;1.41E+00
DCX	0.536445	1.01583	4	TAAATGTAACGCACTCCCTG;GGTTACCATCATCCGCAGTG;GGTACGTTTCTACCGCAATG;GGTTCGGTAGAAGCTACAGT	-0.53;0.04;0.79;1.85	36277;48618;65009;75862	5.51E-01;4.85E-01;4.20E-01;3.58E-02	1580;12433;28824;41165	1.12E+00;9.63E-01;8.88E-01;1.10E+00
SRCAP	0.536402	1.10843	4	TCCAGGGTTGAACTCAACCG;TGCACCTCGTGTCAGCAGGG;AGCTGTCAGAAATCATTGAG;CCAGTGGCAATTCTCCCTCA	-0.44;-0.43;0.08;2.94	37907;38056;49537;77314	5.84E-01;4.26E-01;4.23E-01;2.85E-03	128;27905;39386;39535	2.18E+00;4.97E-01;5.87E-01;1.17E+00
WDR17	0.536304	1.3265	4	AGTATAATCCCAGATTCGAA;AATAACACCTTCATTACCCG;GATCTGACTAGATTCTCAAG;AAAGCCCTGTCAATTGCACC	-1.4;1.16;1.18;1.22	24777;70581;70816;71277	3.95E-01;1.41E+00;5.82E-01;1.44E-01	6165;6626;6861;52665	6.05E-01;1.44E+00;2.60E+00;6.70E-01
CACNB4	0.535843	1.53389	8	GGAATCTCACTCTGTCACCC;CAAGGCAGGCAGATCACCTG;TCCTGCCTCAGCCTCCCGAG;CAGCGGTTGATTAAATCTAG;TGTACCGTCAATGCGTCCGG;TAATTGAACGTTCGAACACC;GCCGAGGCGGGCAGATCACG;GGACCGGGAAGCAATTCGAC	-1.53;-0.53;-0.4;0.73;0.75;1.27;1.75;2.25	23634;36237;38719;63908;64172;71951;75411;76825	7.19E-01;8.57E-01;6.60E-01;1.52E+00;9.58E-01;1.04E+00;7.59E-01;2.77E-02	617;2031;5491;13270;13534;38723;41205;53808	1.22E+00;1.78E+00;1.86E+00;1.55E+00;2.29E+00;9.61E-01;1.34E+00;1.27E+00
SLC17A9	0.535746	1.73963	4	CACGTACCACACCCAAAGCA;GGAGACCTTCCCCGACGCCA;GGCCAGGACTTACCCAAACT;GCAGTTACCGATCCCCGAGG	-3.17;1.35;1.57;2.39	7445;72722;74419;76989	5.47E-01;1.71E+00;8.58E-01;1.02E-02	453;3023;4720;69985	1.64E+00;2.07E+00;3.07E+00;1.76E-01
RHOH	0.535493	1.20072	5	CAAGGCAGGCAGATCACCTG;TGGCCACCCAGACTGACCAG;GTTCAGGAATGAGTTATGGT;AGTGTACGAGAACACAGGGG;GGTGAAGCGCACCAACAGAG	-0.53;0.48;0.69;0.77;1.28	36237;58773;63006;64548;71965	7.27E-01;1.09E+00;7.28E-01;3.96E-01;1.59E-01	5477;12894;14436;18669;41205	5.79E-01;7.94E-01;1.37E+00;1.89E+00;1.37E+00
E2F1	0.535439	1.10789	4	AAGGTCCTGACACGTCACGT;CTGGATGCCCTCAAGGACGT;CACAGGTGTGAAATCCCCGG;CGACGACACCGTCAGCCGAG	-0.38;0.7;0.85;0.97	39032;63371;66011;68103	6.09E-01;8.77E-01;4.37E-01;2.23E-01	9339;11431;14071;38410	4.84E-01;1.02E+00;1.71E+00;1.22E+00
ONECUT1	0.535157	1.02231	4	CTGTGCCCAGGAGTTGCCCG;AGAGATCAATACCAAAGAGG;GGGGAACTTGTCCGAGACTG;GGTATAGAGGTTATTCATGG	-0.43;-0.15;0.94;1.79	38081;43862;67536;75601	5.88E-01;4.41E-01;4.69E-01;4.18E-02	1841;9906;33580;39361	1.05E+00;1.13E+00;7.34E-01;1.18E+00
ZKSCAN8	0.534977	1.10827	5	GCTTCTTGATCCATCACAGA;AGGTAGAGGAGGATCATGGT;TGCAACGGGGATGTTATCAG;CTTCCTTTCTGGGAACGAGT;GCCGAGGCGGGCAGATCACG	-0.4;-0.03;0.39;0.97;1.75	38718;46758;56656;67961;75411	8.06E-01;6.44E-01;5.50E-01;4.40E-01;5.77E-02	2031;9481;20786;30684;38724	9.28E-01;9.94E-01;9.85E-01;1.13E+00;1.51E+00
IL25	0.534683	1.05667	4	CAGACTCACTCATATCTCCA;TGGCCCTACAGGACTCTGGG;CCAAGAATGCAACCACCTGT;GTCTGTAGGCTGACGCAGTG	-0.1;0.32;0.84;1.08	45086;55111;65885;69562	7.70E-01;5.97E-01;4.35E-01;1.86E-01	7880;11557;22331;32356	5.30E-01;1.01E+00;1.17E+00;1.52E+00
TNFRSF12A	0.534352	1.03889	4	CATGGACTGCGCGTCTTGCA;CGTACCTGGCGCTTGCTCCC;GCTCGCTGCGCCGGTTGCTG;GCTGCTTTGGCCCATCCTTG	-0.07;0.33;0.5;1.37	45881;55432;59108;72870	7.95E-01;6.05E-01;3.76E-01;1.06E-01	4572;18334;22010;31561	7.06E-01;7.08E-01;1.18E+00;1.56E+00
MET	0.533991	1.02836	4	AGCTGTGGCAGCGTCAACAG;CCGATCGCACACATTTGTCG;CTCACTGATATCGAATGCAA;TACTGTATTGTGTTGTCCCG	-0.43;0.46;0.65;1.46	38138;58249;62230;73622	5.89E-01;6.81E-01;3.90E-01;8.79E-02	3820;15212;19193;39304	7.71E-01;8.25E-01;1.34E+00;1.18E+00
STXBP5L	0.53377	1.27241	4	GCAAGACTAGTAATCTGTTG;TAGGAGTGGCCAATCAGTGG;TTGCAGCGCTCAAGTTCTAG;TCAAGAACCCTATGCTGTCG	-1.12;-0.6;1.77;2.08	27799;35137;75502;76529	4.22E-01;4.33E-01;1.03E+00;2.06E-02	913;1940;42305;49643	1.34E+00;2.45E+00;5.29E-01;7.72E-01
TP63	0.533397	1.05455	4	GCAGTCGAGCACCGCCAAGT;TGTGTGTTCTGACGAAACGC;GCTGAGCCGTGAATTCAACG;CAATGATTAAAATTGGACGG	-0.18;0.53;0.56;1.23	43165;59736;60364;71513	7.14E-01;7.29E-01;3.79E-01;1.38E-01	5929;17078;17706;34277	6.18E-01;7.51E-01;1.43E+00;1.42E+00
KCNE4	0.533281	1.03521	4	CCTCTGAACAGCACGCACCC;CCTGCTGCTGTACAAAGACG;TGGGCTACATGAAATCCAAG;CCCAAATCGTCCAGTCCAAG	-0.53;0.16;1.07;1.43	36313;51296;69535;73428	5.51E-01;5.23E-01;5.29E-01;9.24E-02	4014;7907;26146;41130	7.53E-01;1.30E+00;9.92E-01;1.10E+00
TNFRSF10C	0.533273	1.05343	4	CTGATTTACAAACTGTACAT;AACAGAGGCACAGCTTCAAG;TGTGTACCCAGGTGCCCTAG;ACAGTGTGTCAGTGTAAAGA	-0.74;0.55;0.77;1.55	32754;60289;64672;74303	4.88E-01;7.49E-01;4.16E-01;7.19E-02	3139;12770;17153;44688	8.44E-01;9.44E-01;1.47E+00;9.55E-01
TFF3	0.533238	1.1096	4	CCAGTGTGCCGTGCCAGCCA;CTGCGTCCCGGAGCCCACGG;AGCTCTGCTGAGGAGTACGT;ACTCCTTGGGGGTGACATGG	-0.96;0.62;1.08;1.39	29683;61716;69597;73067	4.44E-01;8.04E-01;5.31E-01;1.01E-01	4375;7845;15726;47759	7.22E-01;1.30E+00;1.57E+00;8.40E-01
SUCLG1	0.532948	1.25366	5	TCCTTCACAGTATTAAAGAC;TGCTGCGCCAGGAAAAGACA;AAACAACGCAAGTTGGATTG;TCAGTGATACACACAACCAA;GCCGAGGCGGGCAGATCACG	-1.4;0.28;0.93;1.11;1.75	24770;54320;67389;70009;75411	4.66E-01;8.83E-01;9.55E-01;4.94E-01;5.77E-02	2031;7433;10053;23122;52672	9.28E-01;1.17E+00;1.78E+00;1.55E+00;8.37E-01
NATD1	0.532762	1.09978	4	GGGCCGCCTTACCGTTGAGC;GCAGGGCTGCCCCATCCGCG;GGCGATGCCACGCCCACGGT;GTCCTGCTCTATGAGTACGT	-1.0;0.65;0.91;1.57	29136;62344;67129;74430	4.37E-01;8.30E-01;4.60E-01;6.89E-02	3012;10313;15098;48306	8.60E-01;1.10E+00;1.62E+00;8.20E-01
REG1B	0.532667	1.0513	4	CAGAGACAGGAACATCAGGG;GAACATGAATTCAGGCAACC;CTTAATCAGTGAGGCCACGA;CCTTCTGGGCAGCTGATTCG	-0.81;0.5;0.81;1.64	31707;59098;65248;74880	4.72E-01;7.08E-01;4.24E-01;5.84E-02	2562;12194;18344;45735	9.22E-01;9.76E-01;1.39E+00;9.15E-01
VCAN	0.532411	1.0531	4	GCCAACAAGACCACCCACTG;AGGCCAAGTTTATGCAACCA;GAGCCCGGATGGGATATCTG;AGACAGAGGCAGGACTACGT	-0.34;-0.23;1.19;1.51	39839;42217;70979;74051	6.28E-01;4.33E-01;5.90E-01;7.78E-02	3391;6463;35225;37603	8.15E-01;1.45E+00;6.88E-01;1.26E+00
RPS15AP39	0.532316	0.64373	1	CTCACTGTGATGATGAAGCA	0.53	59853	0.112	17589	0.644
RPS15AP33	0.532316	0.64373	1	CTCACTGTGATGATGAAGCA	0.53	59853	0.112	17589	0.644
RPS15AP21	0.532316	0.64373	1	CTCACTGTGATGATGAAGCA	0.53	59853	0.112	17589	0.644
RPS15AP28	0.532316	0.64373	1	CTCACTGTGATGATGAAGCA	0.53	59853	0.112	17589	0.644
RPS15AP5	0.532316	0.64373	1	CTCACTGTGATGATGAAGCA	0.53	59853	0.112	17589	0.644
KLHL28	0.532244	1.03946	4	TGTGACATCATTCTTCGAGT;TTGTGGAGTATGCCTATACA;AGAAACTTAACACTCAACAA;TCATAGCGAGGAATGTTTAG	-0.14;0.23;0.87;1.17	44102;53141;66336;70750	7.41E-01;5.56E-01;4.43E-01;1.57E-01	6692;11106;24301;33340	5.79E-01;1.04E+00;1.07E+00;1.46E+00
SHC2	0.532213	1.1416	4	CCTGACGCGAAGGAGATGGA;ATTACTACAACAGCATCCCG;GGGACTCACCCGCACGACGT;GGGGCCGCGAACTTCCACTG	-1.28;0.72;0.8;1.88	26077;63738;65118;75975	4.06E-01;8.95E-01;4.22E-01;3.32E-02	1467;12324;13704;51365	1.15E+00;9.69E-01;1.74E+00;7.13E-01
GPA33	0.532023	1.1067	5	CAGCGAGACAGAACACTCGT;GATTCTTATAAAGCTCACCA;AATAAGTCCCTCTCGACTGG;GAAGCCCGAAGAACGTCCTG;CATGGCCTTAGAAGAGATGC	-0.51;-0.15;0.43;0.65;2.24	36656;44034;57614;62149;76815	7.40E-01;5.86E-01;5.69E-01;3.88E-01;1.76E-02	627;15293;19828;33408;40786	1.41E+00;6.96E-01;1.03E+00;1.01E+00;1.39E+00
KRTAP15-1	0.532015	1.0469	4	CTGACAGCCATTGTAGAGAG;ACAGGATGTCTGATAGGATC;AAGTGGAAACTGGATACCTC;CTTATGTAGTTAGTCTGGCG	-0.0;0.32;0.55;1.25	47309;55193;60305;71707	8.42E-01;5.99E-01;3.79E-01;1.34E-01	5735;17137;22249;30133	6.29E-01;7.49E-01;1.17E+00;1.64E+00
SUMF2	0.531937	1.05869	4	TCCAGCTCACGTGTAACACT;GGGAAAACGACTGCCCACGG;GGTGACAGGAAATATGTCGA;GCAGGTCAAGTTTACCCATG	-0.17;0.09;0.1;2.1	43567;49717;50150;76577	7.25E-01;4.99E-01;4.17E-01;1.95E-02	865;27292;27725;33875	1.36E+00;5.05E-01;9.29E-01;1.44E+00
C2orf91	0.530994	1.13866	5	CTCAGCCAAGTACCCAACAA;GTGCAGCTGCCAGAGAAACA;GGGGTCTCCAGGCCCAATCG;CAATCTCTCCCACTGACCTA;GCCGAGGCGGGCAGATCACG	-0.72;0.33;0.46;0.84;1.75	33111;55320;58346;65828;75411	6.39E-01;9.25E-01;5.85E-01;4.07E-01;5.77E-02	2031;11614;19096;22122;44331	9.28E-01;8.60E-01;1.07E+00;1.62E+00;1.21E+00
TMCO2	0.530683	1.03048	4	CAGCTGTGCAAATCATCTTG;AGTCCCAAACTTGTTTGCTG;GAATAGGAATATATGCCTTA;GCTTTGCTAGCCAACCCAGA	-0.09;0.03;0.35;1.84	45159;48533;55713;75824	7.72E-01;4.84E-01;3.79E-01;3.67E-02	1618;21729;28909;32283	1.11E+00;6.12E-01;8.85E-01;1.52E+00
FOXP1	0.5302	1.23896	6	CAAGGCAGGCAGATCACCTG;GCCTTCTGACAATTCAGCCC;CATACACCATGTCCATAGAG;AGAGGAGGAGACACATGTCG;GTTCTGTAGACTTCACATGC;GCCGAGGCGGGCAGATCACG	-0.53;-0.15;-0.1;0.98;1.23;1.75	36237;43928;45035;68247;71509;75411	9.22E-01;7.71E-01;5.40E-01;8.94E-01;5.11E-01;6.92E-02	2031;5933;9195;32407;33514;41205	8.61E-01;1.19E+00;1.64E+00;8.08E-01;1.29E+00;1.64E+00
PTPRT	0.529549	1.38893	6	GGATCTCATACTCAACATCG;GTCTGGTGTGTCCAACTACG;CAAGGCAGGCAGATCACCTG;TGGGGTCATCACGCTCTACG;GCCGAGGCGGGCAGATCACG;CGTGTCTGTCTCATTCAATG	-0.95;-0.59;-0.53;1.28;1.75;2.22	29839;35319;36237;72020;75411;76782	6.93E-01;5.64E-01;5.11E-01;1.26E+00;8.61E-01;2.23E-02	660;2031;5422;41205;42123;47603	1.31E+00;2.03E+00;2.26E+00;5.80E-01;8.85E-01;1.27E+00
PSG7	0.52954	1.19642	5	TCAATGCGTCGCTTTACCCT;TGTGACACCAAATAGGTAGA;AGCCACCAAAAGTTTCCGAG;CATCAATAACTTAAACCCCA;TGAATGAAGGGTAAATTCTG	0.1;0.12;0.13;0.35;1.95	50147;50408;50636;55818;76175	1.30E+00;7.44E-01;4.75E-01;4.24E-01;3.58E-02	1267;21624;26806;27034;27295	1.12E+00;5.35E-01;7.51E-01;1.32E+00;2.26E+00
TMEM220	0.529505	1.111	5	TCTTACATGAGGAAGAAGGC;GGACTTAACCCTGAAGTCAC;CAAGCAGGGTCAGTACTGCA;TCTGTTGTGTACGATGCAAG;GCCGAGGCGGGCAGATCACG	-0.38;0.08;0.25;0.95;1.75	39099;49614;53405;67768;75411	8.19E-01;7.20E-01;5.00E-01;4.36E-01;5.77E-02	2031;9674;24036;27828;38343	9.28E-01;9.81E-01;8.47E-01;1.27E+00;1.53E+00
ZNF655	0.529359	1.03958	4	CCCAGAGCCTCAGTTTGTGC;TGAACACTTAAATCTAACAG;TAGGCAAATAACAATCAGCA;GGATTTATCAGACGCTTCAC	-0.08;0.22;0.82;1.16	45497;52872;65455;70598	7.83E-01;5.50E-01;4.27E-01;1.61E-01	6844;11987;24570;31945	5.72E-01;9.88E-01;1.06E+00;1.54E+00
MRVI1	0.529317	1.19162	4	TCCCCAGTCAGGACAATCGT;GGTCAATGATGTGCCCCGCG;GAAACTGACCAAGCTCCGAG;AAGGGAACGCAACCTGACAG	-1.12;0.89;1.09;1.26	27770;66793;69715;71777	4.22E-01;1.07E+00;5.36E-01;1.32E-01	5665;7727;10649;49672	6.33E-01;1.32E+00;2.05E+00;7.71E-01
SH2D4A	0.528835	1.03045	4	CCGGCTGAAAGCAGAACAGG;CTACAAGAGGTTATCCCTCG;GAGAGGAACAGATCCGACGA;AGGAACTGGAGCAAGGATCG	-0.28;-0.23;1.01;1.62	41089;42141;68728;74724	6.59E-01;4.33E-01;5.02E-01;6.20E-02	2718;8714;35301;36353	8.99E-01;1.22E+00;6.86E-01;1.31E+00
MRPS21	0.528085	1.12685	4	TTGAGGACATTAAGCATCGG;GGAACGTGGAAAGCGCATAC;GATGGTACAGGAAGGGAACG;ACAGAATCCTCACTATGGAT	0.27;0.33;0.62;0.89	54049;55300;61610;66822	1.11E+00;6.02E-01;3.85E-01;2.56E-01	10620;15832;22142;23393	4.53E-01;7.99E-01;1.18E+00;2.08E+00
FOSB	0.527683	1.13013	4	TCGTAGGGGTCGACGACCGG;CGAAGACAGATATTGAGACT;GCTGACCGACCGACTCCAGG;GTCACCCCGTAGGAGTGCGC	-1.0;0.74;1.03;1.33	29220;64092;68994;72520	4.38E-01;9.13E-01;5.11E-01;1.14E-01	4922;8448;13350;48222	6.80E-01;1.25E+00;1.77E+00;8.23E-01
ACE	0.527353	1.0086	4	GTTGTAGAAGTCCCAAGCCG;GGAAAACATCTACGACATGG;GGTGTGGAACGAGTATGCCG;GTTTCGTTTCGGGTAACAGG	-0.14;0.05;0.63;1.57	44155;48960;61784;74438	7.42E-01;4.89E-01;3.86E-01;6.87E-02	3004;15658;28482;33287	8.61E-01;8.07E-01;9.00E-01;1.47E+00
LRRN2	0.527183	1.03683	4	TCAACAAGAACCCGCTCCAG;GCCCCGCTCGTCCTACCGCG;AGGCTACGCAGGTTGGCCAG;TGGACATCACCAATAACCCA	-0.34;0.39;0.87;1.19	39830;56805;66422;70946	6.28E-01;6.40E-01;4.45E-01;1.52E-01	6496;11020;20637;37612	5.88E-01;1.05E+00;1.26E+00;1.25E+00
CEP170B	0.527055	1.07295	4	GGAACACACACCATACTGCG;TGTATGTCCCTGCGTCACTG;GTTATCTAGGAAACCGCTTG;AGCACCGTCAGCCTGCGTAG	0.12;0.34;0.37;1.28	50455;55530;56261;72027	9.58E-01;6.07E-01;3.77E-01;1.26E-01	5415;21181;21912;26987	6.48E-01;6.25E-01;1.19E+00;1.83E+00
CATSPER3	0.527025	1.02174	4	CTGTTTGGATCTCCAGACAA;AAGCTTATCGGCTATAGCCA;TATGTCATAACTGGTCCACA;TTCACCAGTTGACACTACAT	-0.51;0.42;0.46;1.73	36742;57449;58316;75310	5.60E-01;6.57E-01;3.75E-01;4.85E-02	2132;19124;19993;40700	9.94E-01;6.83E-01;1.29E+00;1.12E+00
FNDC10	0.526874	1.01588	4	AGCACCTTGTAGGGGCACCA;CTCGCACGGGAAGCGCGTGT;GAGGACGCTGTCGTGCACGT;TGAGCGCGAAGGCGCGCACG	-0.33;-0.24;0.64;2.03	40126;42021;62121;76413	6.35E-01;4.32E-01;3.89E-01;2.32E-02	1029;15321;35421;37316	1.29E+00;8.21E-01;6.83E-01;1.27E+00
LELP1	0.526811	1.16241	4	AGCAGCTTCTTTAAACAGCT;CTGTTTCGAAAAGTGCCCAT;AGTTCTTGGGCTCAGTCTTG;AGGATGAAGGAGACTGCGAG	0.32;0.46;0.53;0.8	55074;58229;59823;65132	1.16E+00;6.80E-01;3.77E-01;3.01E-01	12310;17619;19213;22368	4.22E-01;7.32E-01;1.34E+00;2.16E+00
MAGEL2	0.526227	1.09774	4	AGGAGGAGGATGCACCATCG;CTGGGTCATCGGAACCACCG;AATGATTTAGCGGAGCCCAG;TGGAATCTCGTGTGGCACCG	0.13;0.44;0.51;1.02	50823;57859;59354;68781	9.72E-01;6.69E-01;3.76E-01;2.06E-01	8661;18088;19583;26619	5.04E-01;7.16E-01;1.32E+00;1.86E+00
PEAK1	0.526133	1.26462	6	CAAGGCAGGCAGATCACCTG;GCGCCATCACTGGTTCACAG;ATGACGAGCCAACTTATGCT;GAAGTGATTAGTAATGAAGG;GTGCAAGCCATATACTGTCG;GCCGAGGCGGGCAGATCACG	-0.53;0.28;0.47;0.51;0.68;1.75	36237;54159;58515;59359;62975;75411	9.22E-01;1.22E+00;9.00E-01;5.49E-01;3.99E-01;6.92E-02	2031;14467;18083;18927;23283;41205	8.61E-01;6.40E-01;9.41E-01;1.51E+00;1.99E+00;1.64E+00
GPR68	0.52596	1.17921	5	GGTAGTGCTCAAAGCACACG;GCCGCAAGGACCAGATCCAG;CACGGTAACATAGACCACCG;GAGAACATCTACATCAGCGT;GCCGAGGCGGGCAGATCACG	0.06;0.14;0.28;0.4;1.75	49094;51007;54280;56910;75411	1.24E+00;7.63E-01;5.11E-01;4.13E-01;5.77E-02	2031;20532;23162;26435;28348	9.28E-01;5.54E-01;8.81E-01;1.35E+00;2.18E+00
LEXM	0.5259	1.1528	5	CAAGGCAGGCAGATCACCTG;CACTTGGGTAGAATAACGCG;AGAAACCATGTAGCACCCGG;TCCAGGCCCTGGAAATTATG;ACATATGTGGCACGATCCGT	-0.53;0.35;0.63;0.66;1.52	36237;55819;61790;62511;74133	7.27E-01;9.47E-01;6.83E-01;3.88E-01;9.48E-02	3309;14931;15652;21623;41205	7.46E-01;7.09E-01;1.28E+00;1.66E+00;1.37E+00
MKRN2	0.525323	1.08358	4	AAAGCGTGAAAAGAGAACAT;ATGCAGTGACCTCGGAAGGA;GTTGACGTTCGAACACGAGA;TGTTTAGATATGACCACACG	0.18;0.29;0.54;1.1	51840;54482;59950;69832	1.01E+00;5.83E-01;3.78E-01;1.80E-01	7610;17492;22960;25602	5.40E-01;7.36E-01;1.13E+00;1.92E+00
LOC100127908	0.525289	0.639919	1	TCTGATTCCAGATATGATGA	0.53	59697	0.113	17744	0.64
ALG1L9P	0.525028	1.10192	4	TGTGCTGGAAATGCTTCTGG;TGGCAACTTAGACAGCCCCA;GTAAGGGCCATGTAGAATTG;GACCCCGACCAGCGACACGA	-0.89;0.63;1.08;1.28	30626;61800;69612;72038	4.57E-01;8.07E-01;5.32E-01;1.26E-01	5404;7830;15642;46815	6.48E-01;1.30E+00;1.58E+00;8.74E-01
TRIM6-TRIM34	0.524632	1.87091	12	CATAGTGAGGCGGCTCAGAG;GGTCTTTAACCAGAAGAGAG;ACAGATGTCCAAAGCTACTG;GAACCCCTGAGCATAGACTG;TGGCCACAGTCTAGACTCAA;TCATCTCAGATGTGGAGTGT;GGGGCTACGAATTATAGAAG;GTCAAGTTGAGCCCAGACAA;TCACCACACGTTCCTCGTGG;TGGCCACAGTCTATGCTCAG;GAGTAACTGATACCACACAC;TGGTCACCACACGTTCCTCG	-1.29;-1.03;-0.4;0.23;0.34;0.75;0.77;0.78;0.99;1.19;1.93;2.03	25890;28855;38694;52962;55593;64311;64643;64803;68383;71025;76121;76404	1.34E+00;1.06E+00;1.27E+00;1.97E+00;1.67E+00;2.14E+00;1.56E+00;1.07E+00;9.40E-01;7.19E-01;7.71E-01;7.03E-02	1038;1321;6417;9059;12639;12799;13131;21849;24480;38748;48587;51552	8.58E-01;1.79E+00;1.24E+00;1.47E+00;1.58E+00;2.20E+00;2.90E+00;2.28E+00;2.65E+00;1.79E+00;1.58E+00;2.12E+00
METTL7B	0.524413	1.04827	4	AAGCTACTTCCCCTACCTGA;CCAATATGAGCGGTTTGTGG;GTAGAACTGAAAGTTGGCTC;CTCTGTGCAGAGCCCAAGGA	-0.3;0.11;1.13;1.15	40842;50217;70266;70561	6.52E-01;5.06E-01;5.58E-01;1.62E-01	6881;7176;27225;36600	5.70E-01;1.37E+00;9.48E-01;1.30E+00
FECH	0.523819	1.13424	4	TACAGATACTATAATCAAGT;TCCACTTGAGAAGAGAAGCG;AAGATATGGACTTCCAAGCA;TCTGAATAGGAAGTGTCATG	-1.42;0.27;1.18;2.08	24577;53866;70815;76511	3.94E-01;5.70E-01;5.82E-01;2.10E-02	931;6627;23576;52865	1.33E+00;1.43E+00;1.11E+00;6.63E-01
BBX	0.523347	1.05601	4	CACCCCAGGCTTGATAACCG;TCAATGATCATAATTCCATG;TTTCTTTCGTGGATTGACAG;AAAGCAAAAGAATCCGATGG	-0.12;0.21;0.99;1.02	44503;52504;68352;68810	7.52E-01;5.44E-01;4.91E-01;2.05E-01	8632;9090;24938;32939	5.05E-01;1.19E+00;1.04E+00;1.49E+00
NO_CURRENT_30	0.522989	1.04428	4	AGACTCGTATTGTCATATTA;AGACCCCGTAGGCAGGACGT;AGAGCATGATGACCCGTGAC;AGAGCGTCTTCGTGACAAAC	-0.16;0.36;0.83;1.07	43655;55971;65615;69498	7.28E-01;6.18E-01;4.30E-01;1.88E-01	7944;11827;21471;33787	5.28E-01;9.98E-01;1.21E+00;1.44E+00
MYMK	0.522828	1.03459	4	CCATGACCGATGGGGCTACG;CCTCCCCACTGTCAGCATCG;CCGACTTCGACGAACCCAAG;CCTCATCATCGCGGCAAAGT	-0.93;0.19;0.83;1.99	30117;52183;65751;76297	4.50E-01;5.38E-01;4.32E-01;2.59E-02	1145;11691;25259;47325	1.25E+00;1.01E+00;1.03E+00;8.56E-01
SNX16	0.522458	1.10124	5	CCATCTACACCTACTATACT;GGAAGTGCTAGTCGAAAACC;AGGCTATCAAATGGACCCGG;ACAAGCTCAAATTCTTCTAA;GCCGAGGCGGGCAGATCACG	-0.57;-0.1;0.5;1.04;1.75	35615;44911;59164;69063;75411	7.08E-01;6.03E-01;6.05E-01;4.66E-01;5.77E-02	2031;8379;18278;32531;41827	9.28E-01;1.08E+00;1.11E+00;1.04E+00;1.34E+00
GSTO2	0.522458	1.04424	4	ATTCATAGATCAGTTGACAT;GGCGGGTCCTGTGAGAATAG;GAGAGAATGCACTAATCTGA;TTAGGTCCCACATTTGACCA	-0.65;0.23;1.15;1.36	34197;53068;70475;72803	5.12E-01;5.54E-01;5.67E-01;1.07E-01	4639;6967;24374;43245	7.01E-01;1.40E+00;1.07E+00;1.01E+00
PLIN4	0.522435	1.15785	5	AGTGACTACTGGGCTCGTGG;GTCTGCACTTACGGGCACCA;GATCGTTCTAACTGGTACCA;GGTGCCATGAATGTGGCCAA;GCCGAGGCGGGCAGATCACG	-0.58;-0.44;0.91;0.97;1.75	35535;37875;67093;68068;75411	7.06E-01;4.96E-01;9.35E-01;4.42E-01;5.77E-02	2031;9374;10349;39566;41907	9.28E-01;1.00E+00;1.75E+00;7.78E-01;1.33E+00
IL20RB-AS1	0.522179	0.973049	3	GAGTACAGAGAGGTTCTGAG;AACCTGAAAATGACCCAGAG;ACTATTCTGTCGAATACCAG	-0.66;1.02;1.22	33994;68732;71269	3.82E-01;5.75E-01;1.08E-01	6173;8710;43448	6.93E-01;1.47E+00;7.53E-01
INTU	0.522106	1.05527	4	TTAAAAAAATGATCCAAACG;GCTCGACTCAGAAACCTCAA;CCGAGGATTACTATGACATG;TGGAGAAGAACCGGAAAGCA	-0.82;0.52;0.92;1.47	31620;59679;67201;73693	4.71E-01;7.27E-01;4.61E-01;8.62E-02	3749;10241;17763;45822	7.78E-01;1.10E+00;1.43E+00;9.12E-01
HDHD5	0.521512	1.02478	4	ACTCGGAGAAGAGCTTCATG;ATCGATGGAGTGCTTGTGCG;AAGACCAAAAGGATACCCCT;CCTCTCTTACCTTCAATGCG	-0.27;-0.13;1.05;1.44	41430;44285;69223;73459	6.67E-01;4.44E-01;5.18E-01;9.17E-02	3983;8219;33157;36012	7.55E-01;1.27E+00;7.46E-01;1.33E+00
HDHD2	0.521078	1.06827	4	AACAAGTGATCCTAATGCTG;AAATTCTGAATCAAGCATTC;CAGCCAGAAGTTTACTAGAG;ACAAAGCCAGGTATTACAAG	0.11;0.34;0.35;1.28	50350;55514;55885;72001	9.53E-01;6.07E-01;3.78E-01;1.27E-01	5441;21557;21929;27092	6.46E-01;6.16E-01;1.19E+00;1.82E+00
ASB2	0.520739	1.12526	4	CCCTTGGAACAAGCCCATTG;GAATCTCGCAGAGCCCAACA;AGACACAGACTCGTGCAGAG;CGCACGCGCATACGCCGTAG	0.25;0.35;0.65;0.83	53489;55861;62255;65707	1.09E+00;6.15E-01;3.90E-01;2.85E-01	11735;15187;21581;23953	4.32E-01;8.26E-01;1.20E+00;2.04E+00
SLC5A4	0.520558	1.12385	4	CCCTATCTACATCAAGTCGG;CAGTTGCTACACACCTCGGG;AGGCCATATCACGACCAGCG;GGTGTCTGTGTAAATCACCG	-1.05;0.74;1.0;1.4	28541;64116;68455;73098	4.30E-01;9.14E-01;4.94E-01;1.00E-01	4344;8987;13326;48901	7.24E-01;1.20E+00;1.77E+00;7.99E-01
TBK1	0.520382	1.01147	4	AGTTGATCTTTGGAGCATTG;TCCACGTTATGATTTAGACG;AATCAAGAACTTATCTACGA;ACAGTGTATAAACTCCCACA	-0.56;0.39;0.71;1.55	35752;56598;63544;74272	5.40E-01;6.34E-01;4.02E-01;7.26E-02	3170;13898;20844;41690	8.40E-01;8.86E-01;1.24E+00;1.08E+00
HDX	0.520371	1.02717	4	CAGCATTACATAACTTATGT;CTAGAACACCCTGTAATCCA;ACTAGATGCTGTATGTAATG;GCTCATATTACAGTGTGCAC	-0.68;0.34;0.95;1.46	33822;55664;67777;73636	5.06E-01;6.11E-01;4.75E-01;8.75E-02	3806;9665;21778;43620	7.72E-01;1.15E+00;1.19E+00;9.97E-01
C5AR1	0.520237	1.1225	4	CTGGTGCCAGAACTTCCGAG;CCATTGTACAGCATCACCAC;AGTCGGCTACCGCCAAGTTG;ACTACAGCCACGACAAACGG	0.18;0.45;0.64;0.82	51830;58009;62000;65469	1.01E+00;6.74E-01;3.88E-01;2.92E-01	11973;15442;19433;25612	4.28E-01;8.16E-01;1.32E+00;1.92E+00
ZBED1	0.520043	1.17916	4	CATCACGCGAGTGCTCTATG;CGAACTCGCAGAATTCCTCG;GCTGTACCCAGCCTCCATCG;GCATCTCCACCGACATGTGG	0.26;0.57;0.59;0.66	53734;60580;61078;62432	1.10E+00;7.59E-01;3.82E-01;3.74E-01	15010;16364;16862;23708	3.91E-01;7.78E-01;1.49E+00;2.06E+00
EFEMP2	0.52	1.09175	4	CGATCTTGCGGTAACCATCA;AGAGCCCGACAGCTACACGG;ATGTGAACGAGTGTGACATG;AAGTGCATCAACCACTACGG	-0.97;0.69;0.88;1.48	29515;63109;66576;73813	4.42E-01;8.65E-01;4.48E-01;8.34E-02	3629;10866;14333;47927	7.90E-01;1.06E+00;1.68E+00;8.34E-01
FAM60DP	0.519642	0.637284	1	GTAACAAGGAGATTGAGCTG	0.52	59590	0.114	17852	0.637
FOXE3	0.519565	1.08188	4	CAAAGCGTTCGGTGATGAAG;CGGGCGCGTAGGGCGCGTAG;GCTCCTGCGAGCGGCGACGG;CGAACATGTCTGCGGCCGCG	0.2;0.23;0.6;1.05	52388;53023;61254;69150	1.04E+00;5.53E-01;3.83E-01;1.97E-01	8292;16188;24419;25054	5.16E-01;7.85E-01;1.07E+00;1.96E+00
LINC01389	0.519565	1.08188	4	CAAAGCGTTCGGTGATGAAG;CGGGCGCGTAGGGCGCGTAG;GCTCCTGCGAGCGGCGACGG;CGAACATGTCTGCGGCCGCG	0.2;0.23;0.6;1.05	52388;53023;61254;69150	1.04E+00;5.53E-01;3.83E-01;1.97E-01	8292;16188;24419;25054	5.16E-01;7.85E-01;1.07E+00;1.96E+00
SNHG28	0.519468	1.32982	4	TTCAGACCCAGGATACAGGT;AGTTTATGGACAAGGTGTGG;GCACAAGGCTCTTCACAGTG;CTTGACCTTGACGTAGACCG	-1.87;0.91;1.39;1.65	20759;67068;73056;74939	3.76E-01;1.09E+00;7.21E-01;5.71E-02	2503;4386;10374;56683	9.31E-01;1.77E+00;2.08E+00;5.42E-01
MPHOSPH9	0.519002	1.79374	5	GGAGGTTCAAGATCTAAACA;GGAATCTCACTCTGTCACCC;ATTGAATAGCTGTAACCACC;AGGCTCTAGAACAGAGTCCG;GATGAAGCTACCGTCACTGA	-1.98;-1.53;1.75;1.89;2.47	19776;23634;75419;76006;77062	4.06E-01;5.05E-01;2.20E+00;1.07E+00;1.07E-02	380;1436;2023;53808;57668	1.62E+00;2.49E+00;3.77E+00;4.49E-01;6.40E-01
IMMT	0.518197	1.08873	5	CAAGGCAGGCAGATCACCTG;GGTCCAAGCAGCTCAGTCTG;GCGAGAAGAAATCTGCTCAG;AGAGCTTAGAAGATGCTCTG;GACGATGTGCATGAGCAATG	-0.53;-0.2;0.42;0.82;2.08	36237;42846;57467;65530;76523	7.27E-01;5.64E-01;5.66E-01;4.04E-01;2.59E-02	919;11912;19975;34596;41205	1.25E+00;8.44E-01;1.02E+00;9.58E-01;1.37E+00
TP53	0.517959	1.07485	4	GAGCGCTGCTCAGATAGCGA;CCATTGTTCAATATCGTCCG;GATCCACTCACAGTTTCCAT;GGTGCCCTATGAGCCGCCTG	-0.88;0.65;0.88;1.41	30792;62286;66662;73243	4.59E-01;8.28E-01;4.50E-01;9.68E-02	4199;10780;15156;46650	7.36E-01;1.06E+00;1.62E+00;8.80E-01
DSTN	0.517948	1.0481	4	ATTCCCACAAAATGCTTGAA;AGAAATCAAGAAAAGAAAGA;AAGTGCATCATTGTAGAAGA;ATGCTTGAAAGGATCAGTTA	-0.05;0.27;0.83;1.03	46241;53923;65612;68896	8.06E-01;5.71E-01;4.30E-01;2.03E-01	8546;11830;23519;31201	5.07E-01;9.98E-01;1.11E+00;1.58E+00
BIRC2	0.517836	1.00677	4	TACTCATTGCATAACTGTAG;ATATTCAACTTTCCCCGCCG;ATGCTATGTCAGAACACCGG;CAAGCTACTATGTTCCAAGG	-0.6;0.36;0.62;1.69	35149;56027;61564;75148	5.29E-01;6.20E-01;3.85E-01;5.22E-02	2294;15879;21415;42293	9.65E-01;7.97E-01;1.21E+00;1.05E+00
N4BP2L1	0.517037	1.00317	4	ATTGCAGCATGACTTTCCCA;TCAACGTTCAAGAGTTAGCA;GAAGTCAGGATTGAACTCAT;AAGCCCTATGCAGTCATGGT	-0.57;0.3;0.56;1.77	35673;54706;60477;75535	5.39E-01;5.88E-01;3.80E-01;4.33E-02	1907;16965;22736;41769	1.04E+00;7.55E-01;1.15E+00;1.07E+00
PKP4	0.516702	1.19983	5	TTACTCCTATATATGAGGGG;AGGATCAACTAACAACCATG;TCGAGTCTGTGCATCCGTCA;GAACACAACAGCTACCTACG;GCCGAGGCGGGCAGATCACG	-1.03;-0.42;0.8;1.48;1.75	28879;38387;65197;73762;75411	5.40E-01;5.01E-01;8.26E-01;7.09E-01;5.77E-02	2031;3680;12245;39055;48563	9.28E-01;1.71E+00;1.55E+00;7.95E-01;1.01E+00
GPR61	0.516687	1.04563	4	ACACGCTCAGAAACAAGTAG;AGTCCACCCCATGCGCTACG;CTACTGCAGCATGTTCCGAG;CACCACAAAAAGCTGGCAGT	-0.81;0.35;1.08;1.45	31810;55682;69570;73591	4.73E-01;6.11E-01;5.31E-01;8.86E-02	3851;7872;21760;45632	7.68E-01;1.30E+00;1.20E+00;9.19E-01
FFAR3	0.51668	1.08332	4	CTGCTACCTGGAGTTCCGGA;GGCCGGGTCTTGTACCACAG;TGATCAGCGGGACCACAAAG;TCTACGTCATAGAATTCTCA	0.22;0.27;0.39;1.17	52914;54081;56819;70782	1.06E+00;5.75E-01;3.76E-01;1.56E-01	6660;20623;23361;24528	5.81E-01;6.40E-01;1.12E+00;2.00E+00
BCORL1	0.516331	1.06065	4	TCCCGCATCTGACAGCGCCG;GGAGGCGGGATATATACCAG;TTCCCATTGACTGAACACCG;CTGGAACAAGCCCTGAATGG	-0.86;0.57;0.93;1.43	31053;60522;67401;73384	4.62E-01;7.57E-01;4.66E-01;9.35E-02	4058;10041;16920;46389	7.49E-01;1.12E+00;1.49E+00;8.90E-01
MOGAT3	0.516272	1.07409	4	TGTAGTCGCGATAGACCGGG;GACTGGGACACACCCAACCA;GCGTAAGGCAGTGCTCCCCG;CCTGTACACATGATCCCATG	-1.1;-0.27;0.82;2.62	27952;41432;65502;77172	4.24E-01;4.30E-01;4.28E-01;6.04E-03	270;11940;36010;49491	1.86E+00;9.91E-01;6.67E-01;7.78E-01
C16orf97	0.515938	0.99985	4	CACTGGAATGGAGTTGTCCA;TTGCCCTGGAGGTCCAATAC;AGGCCACCAAACTGGTTAAG;ACCAGCAAGTTATTTCTGTG	-0.18;0.11;0.71;1.43	43296;50233;63392;73396	7.17E-01;5.06E-01;4.00E-01;9.32E-02	4046;14050;27209;34146	7.50E-01;8.78E-01;9.49E-01;1.42E+00
ZNF395	0.5157	1.06231	4	AAGTTGGCCTCGGTCCCGGG;AAGCATCCCCCAAATACTTG;CAGGTTTATGTGTGGTACGG;CTCTGATCAGTTCAAGCGGG	-0.96;-0.16;1.12;2.06	29641;43775;70126;76486	4.44E-01;4.41E-01;5.52E-01;2.16E-02	956;7316;33667;47801	1.32E+00;1.36E+00;7.31E-01;8.38E-01
ORAI3	0.514857	1.10324	4	TACCGGGAGTTCGTGCACCG;CCGAGAGCAAGGCAGACGTG;CCAGAGACTGCACCGCTACG;CAAACTTGACCCAACCAACC	-0.49;0.72;0.91;0.92	37026;63587;67099;67252	5.66E-01;8.88E-01;4.59E-01;2.45E-01	10190;10343;13855;40416	4.63E-01;1.10E+00;1.73E+00;1.13E+00
RAPGEFL1	0.514753	1.03952	4	TGCGTATGGTCACATAAGAG;AATATTCAGAGGAGCCCGCG;AAGGACGAGTCCCTTTACCA;AGACACAGAGATCCACCGAG	-0.68;0.59;0.71;1.44	33743;61051;63449;73493	5.04E-01;7.77E-01;4.01E-01;9.09E-02	3949;13993;16391;43699	7.59E-01;8.81E-01;1.52E+00;9.94E-01
RNF157	0.513569	1.22387	5	CCACGGCATGTACCACTAGA;GTTTGCTGTTCAGGTAGACG;GAGACTGTGCAGTACAAGCG;AAGCCTGGTCAATATCCGAA;GCCGAGGCGGGCAGATCACG	-1.32;-0.19;0.87;1.45;1.75	25656;42972;66465;73603;75411	4.80E-01;5.66E-01;8.96E-01;6.94E-01;5.77E-02	2031;3839;10977;34470;51786	9.28E-01;1.68E+00;1.68E+00;9.63E-01;8.74E-01
GRK1	0.513536	1.15342	4	AGGCGTGGAGAGTCTGTGTG;CTTAAGGCCGGATGTTTACG;GGCCTGGCGGATCCCAACTT;GACAGTGGACCCGTACACAC	-1.57;0.37;1.17;2.07	23297;56336;70802;76500	3.86E-01;6.27E-01;5.82E-01;2.12E-02	942;6640;21106;54145	1.33E+00;1.43E+00;1.23E+00;6.22E-01
ATP4B	0.513536	1.15342	4	AGGCGTGGAGAGTCTGTGTG;CTTAAGGCCGGATGTTTACG;GGCCTGGCGGATCCCAACTT;GACAGTGGACCCGTACACAC	-1.57;0.37;1.17;2.07	23297;56336;70802;76500	3.86E-01;6.27E-01;5.82E-01;2.12E-02	942;6640;21106;54145	1.33E+00;1.43E+00;1.23E+00;6.22E-01
MDM4	0.513371	1.04009	4	ATGTATGCATTTATGCTCTG;TCCAAGTCAAGACCAACTGA;CTCAGAGGTAACCTCTACAT;CAGCATATGGTATATTGTGG	-0.67;-0.19;1.2;1.71	33920;43000;71097;75236	5.07E-01;4.37E-01;5.96E-01;5.02E-02	2206;6345;34442;43522	9.81E-01;1.47E+00;7.09E-01;1.00E+00
IRF2BPL	0.513357	1.05931	4	GCGGTGGCGGGTACTCGAAG;CGACGTGGCCGATACACCCG;GCTTGCTGGAACCATCAACG;CGGCGTCGAAGGCGAAAACG	-0.88;0.57;0.91;1.46	30699;60638;67098;73618	4.58E-01;7.61E-01;4.59E-01;8.79E-02	3824;10344;16804;46743	7.70E-01;1.09E+00;1.49E+00;8.77E-01
PROK2	0.513137	1.03826	4	GACAAGGACTCCCAATGTGG;ATACTAACTTTACGAGTCAG;GCTGCTCACGCCCCGCGCTG;TGCACACCTATGGGCAAACT	-0.66;0.46;0.96;1.29	34151;58264;67846;72097	5.11E-01;6.81E-01;4.77E-01;1.24E-01	5345;9596;19178;43291	6.52E-01;1.15E+00;1.34E+00;1.01E+00
KRTAP19-3	0.512798	1.68779	4	GGCTGTGGCTATGGAGGCTA;AGCTACTACGGCAGCTACTA;AGCCTCCACAGCCATAGCCC;CACAGCCAGAACCCAGTCTG	-3.02;1.14;1.86;2.08	9151;70343;75900;76521	4.89E-01;1.38E+00;1.13E+00;2.08E-02	921;1542;7099;68291	1.34E+00;2.64E+00;2.55E+00;2.18E-01
CENPC	0.512766	0.989722	4	ATCAACTTCGTATCATCGGG;AAAAAACAGATGCCACCTGT;GCGTCCATCTGATTGGTGGG;AAGCCACAAACAGATCAGGT	-0.33;-0.11;0.76;1.73	40186;44688;64419;75337	6.36E-01;4.47E-01;4.12E-01;4.79E-02	2105;13023;32754;37255	1.00E+00;9.30E-01;7.58E-01;1.27E+00
PHF6	0.512639	1.04886	4	AAAACTGCACATAACTCCGA;CTTTATCATGCAATGCACAG;GGCAGCGCACCATAAGTGCA;TTGTAAGTCAAATAGAGACA	-0.82;0.56;0.88;1.43	31648;60358;66492;73443	4.71E-01;7.51E-01;4.46E-01;9.21E-02	3999;10950;17084;45794	7.54E-01;1.05E+00;1.48E+00;9.13E-01
TRIM16L	0.512505	1.08534	5	GTGCAGGTACAGACTCTGCT;GCATGACATCACGTTCGACC;CGAGATGGAGAAGAGTAAGC;TCAGCCCTATGTAAACACTA;GCCGAGGCGGGCAGATCACG	-0.46;-0.12;0.4;0.99;1.75	37594;44505;56988;68406;75411	7.69E-01;5.95E-01;5.56E-01;4.50E-01;5.77E-02	2031;9036;20454;32937;39848	9.28E-01;1.03E+00;1.00E+00;1.03E+00;1.44E+00
ZNF569	0.512413	1.14977	5	CAAGGCAGGCAGATCACCTG;TGATGAGCATCAGAAAAACC;TAGAAAAGCCTTCAGTCACA;GGGAAAAAATCAGAGTTCAG;GAGCAAGGGATGCAATTCGA	-0.53;0.39;0.56;0.86;1.29	36237;56672;60386;66240;72084	7.27E-01;9.86E-01;6.38E-01;4.12E-01;1.56E-01	5358;11202;17056;20770;41205	5.86E-01;8.83E-01;1.19E+00;1.72E+00;1.37E+00
BCL7B	0.512315	1.08994	4	AAGCTGATAGACGTCAGACA;GTCATCCGTGCGGAAGTCGG;AACCCACTTAAATATCCTCA;TGGCGGCCATCGAGAAAGTG	0.1;0.42;0.64;0.9	50049;57337;61999;66841	9.42E-01;6.54E-01;3.88E-01;2.56E-01	10601;15443;20105;27393	4.53E-01;8.16E-01;1.29E+00;1.81E+00
TSPAN13	0.512131	1.13577	4	TGCTAATTGGAATTGCTGCG;CGCTTGTTTAGCCCTGAACC;GCTGATTTCCAGTCTCCGAG;GGATACTCACGGTGTAAAGC	0.06;0.61;0.68;0.71	49075;61346;62832;63417	9.05E-01;7.89E-01;3.95E-01;3.47E-01	14025;14609;16096;28367	4.00E-01;8.52E-01;1.55E+00;1.74E+00
LOC732229	0.512016	0.632831	1	ACTAGCTTAAACAACTGTGA	0.51	59406	0.115	18036	0.633
PLXNB3	0.511802	1.01044	4	ACAGGGTTGGCCACCCACGA;TCCCCCGAGTCGTACCCCTG;CCACAAACTGCCCGTCACCA;GCAGTCGTACAGGATCACTA	-0.36;0.44;0.49;1.47	39528;57849;59023;73723	6.21E-01;6.69E-01;3.76E-01;8.55E-02	3719;18419;19593;37914	7.81E-01;7.05E-01;1.32E+00;1.24E+00
C15orf56	0.511637	0.995535	4	GCGGCGGCGAACCCAGAGCG;CCTCTCGCCGCGAACCTCCG;GAAGTTGCCAAGTGTCGCTG;AAGCCCAGGAACGCTCGAAG	-0.38;0.22;0.44;1.77	39107;52875;57705;75522	6.11E-01;5.51E-01;3.75E-01;4.36E-02	1920;19737;24567;38335	1.04E+00;6.65E-01;1.06E+00;1.22E+00
MXD3	0.511067	1.00004	4	CCAGGATGCACATCCAGGTG;TTCCTGGAGCGCCGTGAGAG;TGGACTGCGATGCGGGCACA;CGTGGTGTACCGGGCACAGT	-0.69;0.2;0.72;1.82	33663;52247;63655;75746	5.03E-01;5.39E-01;4.03E-01;3.84E-02	1696;13787;25195;43779	1.09E+00;8.91E-01;1.03E+00;9.91E-01
TMBIM6	0.51104	1.04863	4	CAGCCGCCACAAACATACAA;TGCCGTGCCCATGAAAGCAG;GAAACTGAACAGAAAAGACT;GACAGCAATACAAAACTCCA	-0.63;0.6;0.84;1.23	34592;61200;65855;71529	5.19E-01;7.83E-01;4.34E-01;1.38E-01	5913;11587;16242;42850	6.19E-01;1.01E+00;1.54E+00;1.03E+00
FDFT1	0.510912	1.02349	4	CTGTATCTTCACCAACTAAG;AGGCGCTGGATGGGGAAATG;GAGTGAAAGTTGTGTAACAG;ACGGCCAAGTCAATATTCTC	0.0;0.1;0.67;1.27	47713;50100;62747;71884	8.56E-01;5.04E-01;3.94E-01;1.29E-01	5558;14695;27342;29729	6.39E-01;8.48E-01;9.44E-01;1.66E+00
LOC107985948	0.510867	0.804841	2	AAGCAAACTTTACGTTCTCG;AATAATGAGCATCTTAGCAT	0.33;0.69	55309;63167	3.89E-01;1.77E-01	14275;22134	5.22E-01;1.09E+00
CEACAM19	0.510663	1.04773	4	AGAGCAGCCTCAAAAGAACC;CAACTCTGAATGGACTATGA;CACACCTGCCCACCAACGCT;TGGGATACAACGGCCTCAGA	-0.24;0.57;0.61;1.09	41971;60678;61544;69827	6.81E-01;7.63E-01;3.85E-01;1.80E-01	7615;15898;16764;35471	5.40E-01;7.97E-01;1.50E+00;1.36E+00
COMMD6	0.510557	1.06918	4	ACATCGGACTTAGCATCCAG;AATCGTCATTTCAAAGCACT;CTAAAAGTGGCAGATCATTC;TTTAGCATCACTGCAACGTA	-1.11;0.41;1.04;1.7	27926;57251;69036;75167	4.24E-01;6.52E-01;5.12E-01;5.18E-02	2275;8406;20191;49516	9.69E-01;1.25E+00;1.28E+00;7.77E-01
LOC644295	0.510397	0.631724	1	GCCCGCTTCAAGGAACGGGT	0.51	59360	0.115	18082	0.632
IFNAR1	0.510264	0.997351	4	CTCCGCGTACAAGCATCTGA;ATAATTGGATAAAATTGTCT;GTACATTGTATAAAGACCAC;TAGATGACAACTTTATCCTG	-0.12;0.12;0.54;1.5	44519;50390;60074;73985	7.53E-01;5.09E-01;3.78E-01;7.93E-02	3457;17368;27052;32923	8.08E-01;7.41E-01;9.55E-01;1.49E+00
SELENON	0.510216	1.09788	4	TCCTCATCCAGGATCACGGA;GAGCAAAGATGGCTTCCTAG;TGAACATGCTCAGCTCACTG;GGACATGGAGTGGCTTTACG	-0.44;0.72;0.86;0.9	37922;63678;66171;66994	5.85E-01;8.92E-01;4.40E-01;2.52E-01	10448;11271;13764;39520	4.57E-01;1.03E+00;1.73E+00;1.17E+00
TIAF1	0.509841	1.06309	4	ACACACACACTTGTCTGCGT;CTTAAGAATGAGGTGCGGAG;GCACCTCATTCTTAAGAACC;ACACGCTGAGACAAAGAGGG	-0.04;0.43;0.72;0.93	46535;57525;63752;67329	8.16E-01;6.60E-01;4.04E-01;2.43E-01	10113;13690;19917;30907	4.64E-01;8.96E-01;1.30E+00;1.60E+00
LRRC4B	0.509806	1.23175	6	AGGTACTCGAAGGCCTGCGT;CAAGGCAGGCAGATCACCTG;CCAGCCGGGTGATCTGCACA;GCGGCTGGAATACATCTCGG;GGGCGTCAGCCAGTTGACGG;GCCGAGGCGGGCAGATCACG	-0.7;-0.53;0.53;0.56;1.46;1.75	33506;36237;59753;60365;73611;75411	8.17E-01;5.80E-01;9.61E-01;5.70E-01;6.38E-01;6.92E-02	2031;3831;17077;17689;41205;43936	8.61E-01;1.52E+00;9.93E-01;1.61E+00;9.22E-01;1.48E+00
NRP2	0.509653	1.11508	5	CGTCGATGAACGAAGTTCAG;ATGTGCGGGTATACCCGGAG;GGAAGTCAGCACTAATGGAG;GGTCCACCTCCCATCAGAGT;GCCGAGGCGGGCAGATCACG	-0.73;0.08;0.19;1.26;1.75	33009;49555;52187;71763;75411	6.36E-01;7.19E-01;4.87E-01;5.68E-01;5.77E-02	2031;5679;25255;27887;44433	9.28E-01;1.37E+00;8.03E-01;1.27E+00;1.21E+00
KIAA1468	0.509258	1.06068	4	TGGGGCAACTGATCCAAAGG;AGATAGTCGTTTAGGATACG;TCGGGAACCGAGTACAGCGT;ATCAATTGATAATCGGGCCG	-0.75;-0.51;0.92;2.38	32734;36604;67249;76975	4.88E-01;4.29E-01;4.62E-01;1.05E-02	467;10193;40838;44708	1.63E+00;1.11E+00;5.57E-01;9.54E-01
LILRB4	0.508124	1.17642	5	TCCTGCCTCAGCCTCCCGAG;ACAGGGTCAGTCCCCCACAG;GTGTCAGTCACGGAGCCCAA;CCTGTGACCTCAGTGCACGG;CTCCATCCCATCCATGACAG	-0.4;0.27;0.73;0.94;1.01	38719;53954;63803;67484;68626	8.06E-01;8.68E-01;7.61E-01;4.31E-01;2.62E-01	8816;9958;13639;23488;38723	4.55E-01;9.61E-01;1.43E+00;1.53E+00;1.51E+00
RSRC2	0.507824	1.61885	4	CAAGATCTAGGTCTCGTGAA;GAAGCAGGGAAAGAAAACGG;GACAAGGAGTAGGAGTCGGT;CTCTAAGAAACATAAGTCTG	-2.95;0.75;2.05;2.18	9985;64319;76440;76710	4.67E-01;9.25E-01;1.30E+00;1.65E-02	732;1002;13123;67472	1.43E+00;3.01E+00;1.79E+00;2.39E-01
SLCO1B3	0.507762	1.79843	6	AACATTCCAGTTGCAACCGT;GGAATCTCACTCTGTCACCC;ACAGCTAATTTGACCAACCA;TCAATGTATGAAATCCCCAA;GCCGAGGCGGGCAGATCACG;TCTGTTTGCTAAAATGTACG	-2.93;-1.53;1.04;1.53;1.75;3.18	10267;23634;69046;74181;75411;77359	4.08E-01;4.87E-01;1.74E+00;1.65E+00;8.61E-01;2.76E-03	83;2031;3261;8396;53808;67185	2.19E+00;2.03E+00;2.88E+00;2.78E+00;5.28E-01;3.70E-01
GPR55	0.50742	1.04006	4	GCACCTTCCTTAAGAACAGG;TCCCTATCTACAGTTTCCAT;GAAGTAAAGGCACTCCACCA;CAGAAGCCCATGATGCCCAT	-0.47;-0.24;1.24;1.5	37329;41988;71543;73994	5.72E-01;4.32E-01;6.19E-01;7.91E-02	3448;5899;35454;40113	8.09E-01;1.53E+00;6.82E-01;1.14E+00
EPG5	0.507163	1.64704	9	GGAATCTCACTCTGTCACCC;GGAGAACTTGCTCAACACAG;GGCCCGTCGTAGTGGCGGTG;GTAGCGGTCATGGACGTCGC;CGCGCAGCGAGAGGTCGTTG;ACAAGTTGCAGCCTACACCT;GTGGATGGAGTATTTGAACA;GCTCCGGAGAGTTATTGAAG;TGGACGCTAGTAGACGAAGG	-1.53;-0.8;-0.41;0.58;0.73;1.13;1.39;1.74;1.75	23634;31848;38515;60726;63872;70231;73014;75354;75434	8.26E-01;8.26E-01;7.78E-01;1.65E+00;1.34E+00;1.42E+00;1.11E+00;7.10E-01;1.03E-01	2008;2088;4428;7211;13570;16716;38927;45594;53808	7.23E-01;1.67E+00;1.96E+00;2.24E+00;2.02E+00;2.39E+00;1.14E+00;1.27E+00;1.42E+00
SLC41A1	0.50691	1.01057	4	CTGGCGATACATCTACCCAC;GTCTCGGGCCAACGCCAAGG;GAATACTGAAGTGGCCATCA;TGGGATCAACCCAGACAACG	-0.07;-0.01;0.85;1.26	45682;47070;66034;71840	7.88E-01;4.67E-01;4.37E-01;1.30E-01	5602;11408;30372;31760	6.36E-01;1.02E+00;8.34E-01;1.55E+00
MAP3K8	0.506799	1.10217	4	TGACACATGGTCATTAGACT;CCAGGGGATCAGGAGAACAT;ATCAGTCAGATATGGAACTG;CTTCGGTCATTTGAACACTT	-0.31;0.72;0.78;0.83	40497;63703;64860;65778	6.44E-01;8.94E-01;4.18E-01;2.84E-01	11664;12581;13739;36945	4.33E-01;9.54E-01;1.74E+00;1.29E+00
ZNF181	0.506398	1.18745	5	ATATGTGATCACGTTATTGG;TGTAAACACTGTCTGCAGTG;GGTTAGTAAGTGATGAGACA;TTTGAATTCTAATAAAAGTG;CAGCATCAGAGAATTCACAC	0.12;0.24;0.26;0.73;1.17	50534;53362;53747;63941;70779	1.32E+00;8.45E-01;5.05E-01;3.92E-01;1.95E-01	6663;13501;23695;24080;26908	5.23E-01;7.67E-01;8.60E-01;1.49E+00;2.30E+00
HIST1H4F	0.50637	1.17083	4	TGTCACGCAGCACTTTGCGA;GAACACCTTAAGAACACCGC;GTGCTGCGTGACAACATACA;GGTAAAGGTTTAGGAAAGGG	-1.68;0.65;0.74;2.31	22378;62314;64054;76897	3.81E-01;8.29E-01;4.07E-01;1.22E-02	545;13388;15128;55064	1.56E+00;9.11E-01;1.62E+00;5.92E-01
RGN	0.506297	1.11117	5	CTTACCAGCAAAGTACCTCC;CTAGCTTGTAAACACTTCTG;CTGCAAAAAAGGTTTGCCGG;AACCATTGGAAATGTCCACC;GCCGAGGCGGGCAGATCACG	-0.84;0.21;0.33;1.08;1.75	31340;52697;55375;69553;75411	5.95E-01;8.21E-01;5.27E-01;4.80E-01;5.77E-02	2031;7889;22067;24745;46102	9.28E-01;1.12E+00;9.27E-01;1.45E+00;1.13E+00
JAK1	0.505752	1.19536	5	TGGTTTCATTCGAATGACGG;CACACTTACTCTCCACGTCG;CCGGAAGTAGCCATCTACCA;GCCTAGACAGCACCGTAATG;GCCGAGGCGGGCAGATCACG	-1.36;0.31;0.74;1.09;1.75	25219;54854;64114;69778;75411	4.73E-01;9.05E-01;7.75E-01;4.87E-01;5.77E-02	2031;7664;13328;22588;52223	9.28E-01;1.14E+00;1.46E+00;1.59E+00;8.56E-01
TMX4	0.505661	1.79379	4	TTCCTGGGCCACGATAACGG;GAGTTACGTTAGAGAAGCCG;GCAGACTGATTCAGAATGGG;GTAGATGTCATTCAAGAACC	-3.62;1.31;1.64;2.69	3254;72293;74862;77215	8.30E-01;1.64E+00;9.20E-01;5.08E-03	227;2580;5149;74188	1.93E+00;2.21E+00;2.96E+00;7.46E-02
ZNF17	0.505449	1.16193	5	AACCTCACATGCATGCAGGG;TCTGAAGGACATTCTACACC;TGTCAGGGCCTTACCTACTG;CAGCATCAGAGAATTCACAC;GGTGCTCAAACAGTGTATGT	-0.88;-0.27;0.93;1.17;1.57	30777;41423;67343;70779;74461	5.82E-01;5.41E-01;9.52E-01;5.23E-01;8.52E-02	2981;6663;10099;36019;46665	7.84E-01;1.25E+00;1.78E+00;9.03E-01;1.10E+00
TBC1D24	0.505304	1.09377	4	ACCCGGGCGAAGTAGCAGAG;GTCGTCCTGCATGACGTTTG;GCTGCACTACAGCATCGACG;TCACGCTGACGATCTCCGAG	-1.3;0.57;0.76;1.99	25783;60589;64425;76303	4.03E-01;7.60E-01;4.12E-01;2.57E-02	1139;13017;16853;51659	1.25E+00;9.31E-01;1.49E+00;7.03E-01
NO_CURRENT_192	0.505235	1.04397	4	GTTCTGCCACCGACTTGGCC;GTTCGCTTCGTAACGAGGAA;GTTCCGTGAGGGTTACTTCA;GTTCCCCGGGAAGTCTATGC	0.07;0.12;0.76;1.07	49258;50501;64460;69506	9.11E-01;5.10E-01;4.13E-01;1.88E-01	7936;12982;26941;28184	5.28E-01;9.32E-01;9.59E-01;1.76E+00
IER2	0.504807	1.19946	4	TATCACTCCCGCATGCAGCG;GCCCCGAGAAGCCGAGTCCA;ACAGCGCATCATGACCCTGT;GCACCCGTTTCCGGAGCCAA	0.38;0.51;0.55;0.58	56395;59303;60287;60848	1.23E+00;7.14E-01;3.79E-01;4.19E-01	16594;17155;18139;21047	3.81E-01;7.49E-01;1.40E+00;2.26E+00
TTC28	0.50351	1.61612	7	ACCAGGCGGTCAAATACCAT;GGAATCTCACTCTGTCACCC;CAAGGCAGGCAGATCACCTG;TTCTAGGCATACTTCCGACA;GATGAACAACAAACTCAACT;GCCGAGGCGGGCAGATCACG;GCAGTGCCTATCACTACCGG	-1.95;-1.53;-0.53;1.17;1.31;1.75;3.31	20040;23634;36237;70727;72300;75411;77379	5.22E-01;4.99E-01;5.41E-01;1.80E+00;1.18E+00;8.06E-01;2.43E-03	63;2031;5142;6715;41205;53808;57402	2.25E+00;1.90E+00;2.11E+00;2.82E+00;7.08E-01;6.19E-01;9.10E-01
ADAT2	0.503302	1.02368	4	GCAGCTGCACACATAATGCA;CACTTTGACGACACCAATCG;GGAGACCGAAAAGTGGATGG;TGACAGCCATATACAACCAG	-0.32;0.18;1.04;1.12	40357;51837;69044;70084	6.40E-01;5.32E-01;5.12E-01;1.73E-01	7358;8398;25605;37085	5.50E-01;1.25E+00;1.01E+00;1.28E+00
KDM5C	0.50329	1.3846	5	CCAAGGCTACAACTTTGCCG;GAAAAAGCTACAGATCTATG;GATACTTCATAGCCCCCACA;GCCGAGGCGGGCAGATCACG;AGATTCCCAATGTAGAACGG	-2.26;0.04;0.87;1.75;2.12	17384;48701;66325;75411;76604	3.91E-01;6.94E-01;8.88E-01;9.29E-01;2.36E-02	838;2031;11117;28741;60057	1.29E+00;2.20E+00;1.66E+00;1.22E+00;5.52E-01
MAGEA2B	0.503287	1.35304	8	TCTAGTGGAAGTTACCCTGG;TCTTTGGAGACAATCCGATG;GATGGTAGTCGAGAAGCTGG;TTGGAACTCGGACTCCAGGT;AGAAGTCCTGGCAATTTCTG;AGTTCCAAGCAGCAATCAGT;GACCAGCTGCAAGTACTCGG;CTCTAGTGGAAGTTACCCTG	-0.5;-0.39;-0.16;0.31;0.42;0.81;1.55;2.0	36790;38918;43718;54873;57360;65290;74270;76317	1.38E+00;9.70E-01;8.02E-01;8.95E-01;6.62E-01;6.06E-01;6.12E-01;5.08E-02	1125;3172;12152;20082;22569;33724;38524;40652	9.79E-01;1.44E+00;1.04E+00;1.02E+00;1.38E+00;1.22E+00;1.52E+00;2.24E+00
MAGEA2	0.503287	1.35304	8	TCTAGTGGAAGTTACCCTGG;TCTTTGGAGACAATCCGATG;GATGGTAGTCGAGAAGCTGG;TTGGAACTCGGACTCCAGGT;AGAAGTCCTGGCAATTTCTG;AGTTCCAAGCAGCAATCAGT;GACCAGCTGCAAGTACTCGG;CTCTAGTGGAAGTTACCCTG	-0.5;-0.39;-0.16;0.31;0.42;0.81;1.55;2.0	36790;38918;43718;54873;57360;65290;74270;76317	1.38E+00;9.70E-01;8.02E-01;8.95E-01;6.62E-01;6.06E-01;6.12E-01;5.08E-02	1125;3172;12152;20082;22569;33724;38524;40652	9.79E-01;1.44E+00;1.04E+00;1.02E+00;1.38E+00;1.22E+00;1.52E+00;2.24E+00
SPINT4	0.503068	1.05219	4	AAATTCATGTCCAATTTGCA;TCTTAGAAGAAATCCCAGCT;TTGAATACCCTGTTATTGGG;AAAATTGCGGAGAAGATATG	-1.0;0.4;1.05;1.56	29210;56997;69253;74348	4.38E-01;6.45E-01;5.19E-01;7.08E-02	3094;8189;20445;48232	8.49E-01;1.27E+00;1.27E+00;8.23E-01
GNAS	0.502829	1.04138	4	AGATTCCAGAAGTCAGGACA;CCCACCAGCATGTTTGACGT;CAGGCACGTTCATCACACTC;CTTTAAAAGGGGCGGCGAAG	-0.31;0.03;0.04;2.25	40591;48346;48692;76832	6.46E-01;4.81E-01;4.33E-01;1.37E-02	610;28750;29096;36851	1.51E+00;4.86E-01;8.78E-01;1.29E+00
C3orf35	0.502677	1.10252	4	ATTGGAGGAGATTTAACACA;GAATAATAAACAGAGGAAGG;CGGGCTAATGCAGAGCAGAT;ACACCAGCATGCAATCACCT	-0.21;0.7;0.73;0.79	42572;63331;63823;65044	6.97E-01;8.75E-01;4.05E-01;3.03E-01	12398;13619;14111;34870	4.21E-01;9.00E-01;1.70E+00;1.39E+00
TRIM6	0.50259	1.34064	7	CATAGTGAGGCGGCTCAGAG;ACAGATGTCCAAAGCTACTG;GAACCCCTGAGCATAGACTG;GGGGCTACGAATTATAGAAG;TCACCACACGTTCCTCGTGG;TGGCCACAGTCTATGCTCAG;TGGTCACCACACGTTCCTCG	-1.29;-0.4;0.23;0.77;0.99;1.19;2.03	25890;38694;52962;64643;68383;71025;76404	6.91E-01;7.84E-01;9.52E-01;1.12E+00;8.12E-01;4.62E-01;4.10E-02	1038;6417;9059;12799;24480;38748;51552	1.06E+00;1.03E+00;1.47E+00;1.82E+00;1.51E+00;1.26E+00;1.24E+00
BCAT1	0.502566	1.11047	5	ACCTCAGTTCCAATGAATGT;GTTTCAGCCAAACCTCAACA;CACGGATCATATGCTGACGG;TTGAAAAATAAGGTCCCACT;GCCGAGGCGGGCAGATCACG	-0.1;-0.07;-0.05;0.99;1.75	45049;45665;46153;68346;75411	1.05E+00;6.19E-01;4.61E-01;4.48E-01;5.77E-02	2031;9096;31289;31777;32393	9.28E-01;1.02E+00;6.30E-01;1.08E+00;1.89E+00
RAB42P1	0.50232	0.819748	2	CAGGGAGGCAGCTAGCTCCT;GGCCACTCAGGGCCCGGACA	0.41;0.6	57083;61176	4.12E-01;2.05E-01	16266;20359	4.79E-01;1.16E+00
EHF	0.501937	1.16094	5	CAAGGCAGGCAGATCACCTG;TGGTACTTGGTCCAGTACTG;TTTGCTGTCCAACAAATCTG;GGCCCTCTTACCATTGCACG;GGATACAATTGGCATCCAGC	-0.53;0.52;0.52;0.7;1.31	36237;59538;59618;63202;72303	7.27E-01;1.14E+00;6.17E-01;3.89E-01;1.49E-01	5139;14240;17824;17904;41205	5.98E-01;7.36E-01;1.14E+00;1.96E+00;1.37E+00
NO_CURRENT_176	0.501721	1.07531	4	GGTCACCGATCGAGAGCTAG;GGTCCCTCTGGCTGGGTTAA;GGTCCGCGCACAAGAGCAGG;GGTCCCTCAGGGTGCAACTT	-0.24;0.61;0.79;0.85	42008;61355;64929;66085	6.82E-01;7.89E-01;4.19E-01;2.75E-01	11357;12513;16087;35434	4.38E-01;9.58E-01;1.55E+00;1.36E+00
RIT1	0.5015	1.1661	5	CAAGGCAGGCAGATCACCTG;GTGATGATCTGGCTTACCAA;AGACCTCAAACAGCTAAGAC;CAGGTGTATCGTCAGTACGT;CATGCGGGACCAGTATATGA	-0.53;0.4;0.72;0.73;1.19	36237;56960;63681;63881;70967	7.27E-01;1.00E+00;7.56E-01;3.92E-01;1.90E-01	6475;13561;13761;20483;41205	5.30E-01;7.64E-01;1.42E+00;1.74E+00;1.37E+00
PAM16	0.50134	1.05457	4	CTGCCGCAAGGCCCGTGCAA;CTGGCCCAGATCATTGTGAT;GCAGCCGCTTCCAACCTCTC;CCCGAGGACGCGCTGGACAC	-0.1;0.37;0.87;0.88	44966;56164;66310;66514	7.66E-01;6.23E-01;4.43E-01;2.64E-01	10928;11132;21278;32476	4.47E-01;1.04E+00;1.22E+00;1.51E+00
LYZL4	0.501013	0.977463	4	GTGGCTAAGAAACTCCACGA;ATCTACGAGAACACACGTGA;CAAGTGGTGCTTACATCTTG;CGGAACATGACATATGGCAG	-0.44;0.17;0.67;1.6	37945;51727;62702;74618	5.85E-01;5.30E-01;3.93E-01;6.45E-02	2824;14740;25715;39497	8.84E-01;8.46E-01;1.01E+00;1.17E+00
SLC37A2	0.500993	1.02771	4	GAGAACTCGACCACGCCCTG;AACTATAAGGAGTTACTAGG;GGATGTTGCCCACAGATGTG;GCTGAGAGGTAGTAACGGAG	-0.12;-0.04;0.12;2.04	44553;46375;50610;76434	7.54E-01;4.61E-01;4.12E-01;2.27E-02	1008;26832;31067;32889	1.30E+00;5.12E-01;8.11E-01;1.49E+00
C8orf89	0.500584	0.982761	4	TGTAAGTTCAACTCCACTAG;ATCAAAATGCCATATTTACC;CTCTTCTAGACCAAATGCTG;GACACCTCGGCATCAGCACG	-0.39;-0.09;0.86;1.62	38942;45312;66271;74738	6.07E-01;4.52E-01;4.42E-01;6.17E-02	2704;11171;32130;38501	9.01E-01;1.04E+00;7.77E-01;1.21E+00
NFX1	0.500155	1.42885	4	AAGAGAAATGCACTGTACGG;CTTACCACAGAAACAAGTGT;CTACATTTATGTGTGACAAG;TCCACATAACACATCTCGGG	-2.55;0.9;1.41;2.24	14515;66924;73199;76813	3.96E-01;1.08E+00;7.33E-01;1.41E-02	629;4243;10518;62927	1.50E+00;1.79E+00;2.06E+00;3.61E-01
TMEM173	0.500086	1.03205	4	GCTGGGACTGCTGTTAAACG;GGTACCGGGGCAGCTACTGG;CATTACAACAACCTGCTACG;TGAAAAAGGGAATTTCAACG	-0.71;-0.35;0.45;2.61	33305;39731;57966;77168	4.97E-01;4.27E-01;3.75E-01;6.13E-03	274;19476;37711;44136	1.85E+00;6.72E-01;6.25E-01;9.77E-01
B3GNTL1	0.5	0.983625	4	CCACCGAACGATACACACGT;ATGACGTCATGATGCCCCAG;GCAGGAGACTCTGGTCCACG;GTGGGCCCCTTTAACGAGGG	-0.34;0.24;0.68;1.42	39916;53319;62802;73348	6.30E-01;5.59E-01;3.94E-01;9.43E-02	4094;14640;24123;37526	7.46E-01;8.51E-01;1.08E+00;1.26E+00
KCNQ1	0.499516	1.11851	4	GCGATACTCACACGGCGAAG;ATGCTACACGTCGACCGCCA;GCACTCCACAGACCTCATCG;GGTGAACGAGTCAGGCCGCG	0.24;0.38;0.63;0.75	53191;56446;61902;64237	1.07E+00;6.30E-01;3.87E-01;3.25E-01	13205;15540;20996;24251	4.10E-01;8.11E-01;1.24E+00;2.02E+00
DRP2	0.498453	1.00626	4	AACAGCTTTAGGCTTAGGCA;TTTAAACCTAGTGGTCGCAG;CTGGATCCGCTGTTTCGGGG;TGGAACAGATCAACGTCCGA	-0.38;0.47;0.6;1.3	39141;58592;61228;72185	6.12E-01;6.91E-01;3.83E-01;1.22E-01	5257;16213;18850;38301	6.58E-01;7.84E-01;1.36E+00;1.22E+00
CKS1BP7	0.498161	1.06301	2	CAGACATGTCATGCTGCCCA;TTCGGACAAATACGACGACG	-1.21;2.21	26748;76760	3.45E-01;7.67E-03	682;50694	1.76E+00;3.68E-01
CKS1BP6	0.498161	1.06301	2	CAGACATGTCATGCTGCCCA;TTCGGACAAATACGACGACG	-1.21;2.21	26748;76760	3.45E-01;7.67E-03	682;50694	1.76E+00;3.68E-01
LENEP	0.49815	1.09637	4	GGGGCCCCTCCGAGGAAGAA;CCTGTGCCCATCTTAATGAC;CCGCAGCCCAGTGTCTCGAG;CATTAAGATGGGCACAGGGT	0.08;0.53;0.56;0.84	49490;59714;60334;65802	9.20E-01;7.28E-01;3.79E-01;2.83E-01	11640;17108;17728;27952	4.33E-01;7.50E-01;1.43E+00;1.77E+00
CT83	0.497515	1.00067	4	TTCTGCCTGGCTATTGAGTG;CTTTCTTTACAGAGAAACAC;TATTTAAAATATCCCGAGAG;TTAATTAACCCAGAAGAAGA	-0.13;0.06;0.84;1.22	44311;49084;65850;71380	7.47E-01;4.91E-01;4.34E-01;1.42E-01	6062;11592;28358;33131	6.10E-01;1.01E+00;9.05E-01;1.47E+00
DEFB115	0.497264	0.98386	4	AATCATGCAAAGAAATTGAG;AGAGTTTAATGTCTCCTGAG;AGACATTAAACTCTCTGTCC;CCTGGCCTTAGTTGTCCTTG	-0.62;-0.02;0.58;2.05	34780;46857;60880;76439	5.22E-01;4.65E-01;3.81E-01;2.26E-02	1003;16562;30585;42662	1.30E+00;7.71E-01;8.27E-01;1.04E+00
NANS	0.496647	1.10046	5	CAAGGCAGGCAGATCACCTG;TATGTGACGTTCCAACACCT;GAGATCGGCCAGAACCACCA;GCCCAATGGTGATCTCCAGT;TTCCTGGGGGAAGACGTACG	-0.53;0.07;0.21;1.23;1.51	36237;49341;52638;71388;74034	7.27E-01;7.12E-01;4.92E-01;5.49E-01;9.77E-02	3408;6054;24804;28101;41205	7.36E-01;1.32E+00;8.19E-01;1.26E+00;1.37E+00
GMFG	0.496396	1.15039	4	TACAAGTACGTGCATGACGA;AGTTGCCGGAGAGACAGCCC;GCCTCAGAACATTTCCCCAG;AAGATGTCACTCACTTATGA	0.25;0.5;0.6;0.64	53550;59075;61118;62079	1.09E+00;7.07E-01;3.83E-01;3.84E-01	15363;16324;18367;23892	3.89E-01;7.80E-01;1.39E+00;2.04E+00
S100G	0.496301	0.995613	4	AGTCTCCTGAGGAACTGAAG;TGATCCAGACCAGTTGTCAA;CTGGTCTGGATCACCTTCTT;CCACTTACTTTGAGTAAACT	-0.3;0.38;0.6;1.3	40757;56524;61289;72188	6.50E-01;6.32E-01;3.83E-01;1.22E-01	5254;16153;20918;36685	6.58E-01;7.86E-01;1.24E+00;1.30E+00
TIGD7	0.49615	1.05297	4	TAGATGATGCGGTCTACATG;TGGGAACCGAAAAGGATGTG;TGTCTAGCTCAGCTATACAG;TGTTCTAAGATTTCATGACG	-0.24;0.61;0.65;0.97	42033;61353;62238;67962	6.83E-01;7.89E-01;3.90E-01;2.27E-01	9480;15204;16089;35409	4.80E-01;8.26E-01;1.55E+00;1.36E+00
DACH2	0.495602	1.02794	4	CTCAACAGTACACACCACGG;CATATTAGGAGTAAGACGAG;ACTCCCAAAGAACGCTTAGG;GCATGAGCAATTCCATGTTG	0.03;0.28;0.42;1.25	48478;54110;57452;71714	8.83E-01;5.75E-01;3.75E-01;1.33E-01	5728;19990;23332;28964	6.29E-01;6.58E-01;1.12E+00;1.71E+00
P4HA3	0.495464	1.02401	4	AGAGAAGAAACTCCCGAGAG;AGACCAGAGACACCTACGAG;TCATGGTAGAGAGCAATGTA;TGAGGATTCAACAACCCCTG	-0.31;0.44;0.81;1.05	40490;57883;65275;69142	6.44E-01;6.70E-01;4.24E-01;1.97E-01	8300;12167;19559;36952	5.16E-01;9.78E-01;1.32E+00;1.29E+00
LGI4	0.495381	1.01152	4	TGAAAGTCTTGGGGTCGAGG;GACACCCTTACTCATGTGTG;AGGGCAACCCTGCTTCGTGG;TAAGCGAGCGAAGTCCTCTG	0.03;0.07;0.57;1.31	48345;49460;60537;72354	8.78E-01;4.95E-01;3.80E-01;1.18E-01	5088;16905;27982;29097	6.69E-01;7.58E-01;9.19E-01;1.70E+00
ZNF12	0.495201	1.11505	4	AATAGCCTTTCTCCAGATGT;GGGTCGTGAGAGTAGACTTG;ATGAAAGCTGATGAATGTAG;CACCTGGATAGCTCTGAAGT	0.27;0.4;0.48;0.83	53867;56974;58762;65753	1.11E+00;6.44E-01;3.75E-01;2.84E-01	11689;18680;20468;23575	4.32E-01;6.97E-01;1.26E+00;2.07E+00
LRRK1	0.494659	1.17618	5	CTGATGAAGATGATCATCGT;GATCAATCAAGGAATTGACG;CGACGACGTGCAGTACCTGA;GGCCCCAGGGGATAACCGAG;GCCGAGGCGGGCAGATCACG	-1.29;0.41;0.67;0.94;1.75	25879;57190;62686;67512;75411	4.84E-01;1.01E+00;7.15E-01;4.31E-01;5.77E-02	2031;9930;14756;20252;51563	9.28E-01;9.63E-01;1.34E+00;1.76E+00;8.83E-01
SP100	0.494585	1.05434	4	TGATGAGATCACGATCACGG;TTTATTACAATTAGGCCCAG;AGTCAAGCATCTGACATGAT;GCATGAGATGGGGAACCCGA	-0.46;0.59;0.89;0.96	37576;60932;66724;67920	5.77E-01;7.73E-01;4.51E-01;2.28E-01	9522;10718;16510;39866	4.79E-01;1.07E+00;1.52E+00;1.15E+00
CD14	0.49414	1.19735	4	GGAGTACGCTAGCACACGCA;GGGCGAACGCGGACTGATGG;GTTTCTAAAGCGCGTCGATG;TCGCCCACGACACGTTGCGT	-1.25;-0.83;1.24;2.81	26367;31376;71600;77274	4.08E-01;4.58E-01;6.23E-01;3.75E-03	168;5842;46066;51075	2.06E+00;1.53E+00;4.67E-01;7.23E-01
PGAP3	0.493671	1.02656	4	CACACAGGTGTGGTACATGG;AGTCGCGGTACACCGGCTCA;GTCCCTGGTGTGGAAAACTG;ATACTTACAGTCGTCCCGAC	-0.11;-0.03;1.05;1.07	44712;46784;69153;69413	7.59E-01;4.64E-01;5.16E-01;1.90E-01	8029;8289;30658;32730	5.25E-01;1.26E+00;8.24E-01;1.50E+00
C16orf72	0.493568	1.09477	4	CCCTAACCGAGCTACTTCAA;GCCGTGGCCCAGCTCTACAA;GCAATAAGGATGTGTTGGCT;TTTGTAGAGATTGGTGACGG	0.1;0.42;0.7;0.75	50022;57457;63262;64326	9.41E-01;6.58E-01;3.99E-01;3.22E-01	13116;14180;19985;27420	4.11E-01;8.72E-01;1.29E+00;1.80E+00
ANKLE1	0.49285	1.08151	4	TCAGTGCCTCGACAGATCTG;ACCTAGGTCTCAGGGCACGG;TCCTGCAGGATCTCGACACG;TAGGAAATCGACCGACCAGG	-0.14;0.61;0.72;0.79	44067;61490;63592;64926	7.39E-01;7.95E-01;4.02E-01;3.06E-01	12516;13850;15952;33375	4.19E-01;8.88E-01;1.56E+00;1.46E+00
LOC107984878	0.492702	0.882088	2	TACTGGACCAGGCTTTGACG;GCCGAGGCGGGCAGATCACG	-0.76;1.75	32488;75411	3.12E-01;2.31E-02	2031;44954	1.29E+00;4.72E-01
LOC107986523	0.4927	0.622739	1	AAATAAGGAGGGATAACACC	0.49	58982	0.118	18460	0.623
ZNF341	0.492623	1.31959	7	GGAATCTCACTCTGTCACCC;CAAGGCAGGCAGATCACCTG;CAACAAATACTCCACCCCTG;CAGCGTTTATGACCCACAAG;GGTCACAGAGTTTCGAGACA;GCCGAGGCGGGCAGATCACG;CGTTGCTGGAGAGTCAAAGG	-1.53;-0.53;-0.06;0.12;0.97;1.75;2.73	23634;36237;46016;50431;68050;75411;77238	6.19E-01;7.08E-01;7.01E-01;5.73E-01;7.91E-01;8.06E-01;7.98E-03	204;2031;9392;27011;31426;41205;53808	1.74E+00;1.90E+00;1.43E+00;8.45E-01;1.09E+00;1.13E+00;1.11E+00
MPND	0.492606	1.42953	6	AGCCAGACGGAAGGATCATG;AGTCTGACCTGGCCAAGTCG;CTGACACGGAGTGAGGTCGT;ACAAGAGTCGGAGACCACTG;CGATAAAAAGAAACTAGTGA;GCCGAGGCGGGCAGATCACG	-1.77;-0.37;1.04;1.1;1.21;1.75	21587;39249;69084;69881;71207;75411	4.86E-01;6.42E-01;1.75E+00;1.02E+00;4.98E-01;6.92E-02	2031;6235;7561;8358;38193;55855	8.61E-01;1.16E+00;1.86E+00;2.79E+00;1.05E+00;8.51E-01
DOK1	0.492605	1.01542	4	TCGAAAGAGAACATGACCTA;AGGATCCCAATTCTGGGTAA;GCAATGCGCAGGGAGTCTAA;AAGGCTGACTCTCCTGACCG	-0.48;0.39;0.93;1.13	37217;56641;67467;70214	5.70E-01;6.35E-01;4.68E-01;1.70E-01	7228;9975;20801;40225	5.56E-01;1.12E+00;1.25E+00;1.14E+00
TLR3	0.49255	1.06251	4	GGAAATAAATGGGACCACCA;ACGACTGATGCTCCGAAGGG;CCAATTGCGTGAAAACACCC;ACTTACCTTCTGCTTGACAA	0.21;0.21;0.5;1.05	52599;52601;59141;69231	1.05E+00;5.45E-01;3.76E-01;1.95E-01	8211;18301;24841;24843	5.19E-01;7.09E-01;1.05E+00;1.98E+00
WIZ	0.49252	0.986778	4	GTGAGATGTGAAGGTCCGAG;CGTGACTCGACAGGCCCTTG;TGGTGATACCGAAGTCACGT;GCTCGCCCATCGACACGCTG	-0.14;0.19;0.47;1.46	44099;52116;58371;73639	7.40E-01;5.37E-01;3.75E-01;8.75E-02	3803;19071;25325;33343	7.72E-01;6.85E-01;1.03E+00;1.46E+00
B3GNT6	0.492437	1.06767	4	GGCGCCAAGGTCCCCGCGGG;CTGCAGGAAGCGGACTACGT;GAGGCGTTCGCCACGCACGG;CCGGGGTGCCCAATAGAAAG	0.19;0.24;0.61;0.94	52066;53161;61420;67493	1.02E+00;5.56E-01;3.84E-01;2.39E-01	9949;16022;24281;25376	4.68E-01;7.92E-01;1.07E+00;1.94E+00
KRTAP6-3	0.491498	1.07933	4	AGCCGCCATAACCACAGCCC;TACTACAGAAACTACAATGG;TATGGGTGCTGTGGCTACGG;GGCTATGGAGGCCTGGACTG	-1.16;0.09;1.31;1.72	27377;49888;72319;75253	4.18E-01;5.01E-01;6.67E-01;4.98E-02	2189;5123;27554;50065	9.84E-01;1.64E+00;9.35E-01;7.58E-01
PCNX3	0.491283	0.984601	4	GGACCTCTGTGCGCTATGAG;TACAGCCAGTATGAAGTGCG;TCGACGGGAACAACGCAGGG;AGAGGCGAAATGCAGCGCAG	-0.13;0.15;0.47;1.48	44382;51180;58494;73763	7.49E-01;5.21E-01;3.75E-01;8.45E-02	3679;18948;26262;33061	7.85E-01;6.88E-01;9.87E-01;1.48E+00
LOC107987327	0.491233	0.88269	2	GTGAAGTCACTCACAAGCAT;GCAAGTCGTAAACATCGTCT	-0.77;1.75	32388;75426	3.13E-01;2.29E-02	2016;45054	1.29E+00;4.70E-01
AANAT	0.490818	0.983913	4	GGTGAGGCAGCGAAACTCAC;GTGGCGCCGCTGACAGCTCG;GCCCTCCTCGAACCAGCCCA;ACCTTCACGCTCGATCTCAA	-0.51;-0.01;0.98;1.5	36580;47175;68211;73990	5.57E-01;4.68E-01;4.87E-01;7.92E-02	3452;9231;30267;40862	8.08E-01;1.18E+00;8.37E-01;1.11E+00
HLA-DRB1	0.490294	1.08633	5	GTCCCCAGACAAAGCCAGTG;CAGATACTTCTATAACCAGG;CAGGTGGTTCCTGAACGGCC;TCTGCAGTAGGTGTCCACCG;AAAGCTGACAGTGACACTGA	-0.65;0.07;0.51;0.53;1.99	34320;49297;59446;59718;76289	6.72E-01;7.11E-01;6.12E-01;3.93E-01;3.25E-02	1153;17724;17996;28145;43122	1.15E+00;6.19E-01;1.13E+00;1.26E+00;1.27E+00
LOC105371520	0.490076	1.08598	4	GCCTCTCACGTTCACCCCCG;CTCCACTGCAAAGAGGCCCA;CAGGAGCGTCAGGAAGCGAG;GCCGAGGCGGGCAGATCACG	-1.31;0.36;1.16;1.75	25721;56142;70597;75411	4.03E-01;6.22E-01;5.72E-01;4.61E-02	2031;6845;21300;51721	1.01E+00;1.41E+00;1.22E+00;7.01E-01
PNPLA6	0.489965	1.04598	4	CCTTGGGTCACATCAAACGC;CGATGTAAGTGCAGTCGGAG;TCACTGTTAAGGAGTAGCGT;CTGTGAATACAGCTACTGTG	-1.17;0.24;1.0;1.88	27233;53271;68520;75986	4.16E-01;5.58E-01;4.96E-01;3.30E-02	1456;8922;24171;50209	1.15E+00;1.21E+00;1.08E+00;7.53E-01
FZD4	0.489818	0.970753	4	GAGCAGCCGTACTGGATGAG;CAAGAAGGACTTAAGAACAC;ATCTCCATGTGCCAGAACCT;CCTAGAAGAATCGATCAGGA	-0.26;0.01;0.68;1.53	41553;48050;62834;74161	6.70E-01;4.78E-01;3.95E-01;7.52E-02	3281;14608;29392;35889	8.27E-01;8.52E-01;8.67E-01;1.34E+00
SMAD3	0.489246	1.07761	5	AGAAGCGCTCCGAATTGGAG;TGGCGTGGCACCAACACAGG;TCCCCAGCACATAATAACTT;CTACCTGGAATATTGCTCTG;GCCGAGGCGGGCAGATCACG	-0.28;0.03;0.11;0.84;1.75	41107;48493;50174;65935;75411	8.91E-01;6.89E-01;4.72E-01;4.08E-01;5.77E-02	2031;11506;27268;28949;36335	9.28E-01;8.66E-01;7.37E-01;1.21E+00;1.64E+00
SPINT1	0.489219	1.11741	4	CTGCCTCGCATCCAACAAGG;CTTCATCAACTACCTCACGA;CCTGAACAGCTTTACCGCCG;CCAAACCAGGTGGAACTGTG	0.28;0.39;0.49;0.79	54313;56606;59026;65018	1.13E+00;6.34E-01;3.76E-01;3.04E-01	12424;18416;20836;23129	4.20E-01;7.05E-01;1.24E+00;2.10E+00
CUBN	0.488899	1.00952	4	GTATTCACACACTCAACGGG;CAAGTACAGTTGATACCGTG;CAAATGCAATCAGCGTGCGG;ACGGTTCTATTAAGTCTCCG	-0.65;-0.05;1.17;1.49	34205;46170;70717;73896	5.12E-01;4.59E-01;5.78E-01;8.14E-02	3546;6725;31272;43237	7.98E-01;1.42E+00;8.04E-01;1.01E+00
THEM5	0.488874	1.05325	4	AGGATCCAAATGCTGAGGCA;ACCAGGTGCATCCAAGTGGA;AGGAAACTGCCAGTCCAGAT;ACCCCCAGGTTTGCTCACGG	0.15;0.31;0.33;1.17	51206;54840;55241;70766	9.88E-01;5.91E-01;3.81E-01;1.57E-01	6676;22201;22602;26236	5.80E-01;6.00E-01;1.15E+00;1.88E+00
FOXP3	0.488602	1.08414	4	ACCCAGGCATCATCCGACAA;CCTACTTAGGCACTGCCAGG;CCCACCCACAGGGATCAACG;GAGGGTGCCACCATGACTAG	-1.06;0.61;1.09;1.31	28475;61400;69773;72362	4.30E-01;7.91E-01;5.38E-01;1.18E-01	5080;7669;16042;48967	6.69E-01;1.32E+00;1.55E+00;7.96E-01
LOC105374764	0.488467	1.08059	5	CCTACTATTTCCCACTGTGG;GTAGCCCAGATACAACCGGA;CGTGGGTAACCTACAGGAGA;ACCGGTCCAGAGTCCAATGA;GCCGAGGCGGGCAGATCACG	-0.35;-0.01;0.0;1.05;1.75	39747;47104;47756;69251;75411	8.42E-01;6.53E-01;4.63E-01;4.71E-01;5.77E-02	2031;8191;29686;30338;37695	9.28E-01;1.10E+00;6.69E-01;1.14E+00;1.56E+00
LRRC66	0.488016	1.03021	4	ATTGAAACTTACATCCACAG;AGAATGGACTTATGAAACTG;GACAACGCGTATTCAAACGA;AGTTCTATCAGGAATTACGG	-0.23;0.47;0.75;0.96	42209;58472;64253;67893	6.88E-01;6.88E-01;4.10E-01;2.29E-01	9549;13188;18970;35233	4.78E-01;9.22E-01;1.35E+00;1.37E+00
AKAP4	0.487919	1.41381	4	AAAGCAAGGAAACTCATGCA;GGATTACCAGAGAAGATAGT;GACACTGTAGCAGTTCTCAG;GAACCTGCATAATATTACTG	-2.03;1.18;1.4;1.41	19374;70805;73139;73228	3.75E-01;1.43E+00;7.28E-01;9.72E-02	4214;4303;6637;58068	7.35E-01;1.78E+00;2.64E+00;5.00E-01
CD80	0.487917	1.08894	4	AGGTGTTATCCACGTGACCA;AGGCTCTGGAAAACCTCCAG;CGTATGTGCCCTCGTCAGAT;TGACGTTATCAGTCAAAGGT	0.12;0.48;0.52;0.84	50542;58624;59576;65805	9.61E-01;6.92E-01;3.77E-01;2.83E-01	11637;17866;18818;26900	4.33E-01;7.24E-01;1.36E+00;1.84E+00
DEFB131D	0.487826	0.875299	3	GAACTGTGGACATCAAGGAA;ATCATTAGAAATGAAGCTTC;CTGCAATGATAATATTCTGA	-0.12;0.51;1.07	44648;59379;69449	5.08E-01;3.86E-01;1.42E-01	7993;18063;32794	6.04E-01;9.03E-01;1.12E+00
DEFB131C	0.487826	0.875299	3	GAACTGTGGACATCAAGGAA;ATCATTAGAAATGAAGCTTC;CTGCAATGATAATATTCTGA	-0.12;0.51;1.07	44648;59379;69449	5.08E-01;3.86E-01;1.42E-01	7993;18063;32794	6.04E-01;9.03E-01;1.12E+00
ELL2	0.487464	1.24653	5	GACACGAGAAAGAATGACCC;CAATAAGAGTACTCACCCCG;CTATGTTTATGACATACCTG;AATCCTTTAAGGTATATGAG;GCCGAGGCGGGCAGATCACG	-1.51;-0.15;1.14;1.22;1.75	23773;43852;70378;71274;75411	4.51E-01;5.82E-01;1.20E+00;5.44E-01;5.77E-02	2031;6168;7064;33590;53668	9.28E-01;1.31E+00;2.20E+00;9.99E-01;7.96E-01
KIFAP3	0.486767	1.18099	6	CAAGGCAGGCAGATCACCTG;AAACAGGAACAGCTATTACG;ATACACTGACTGTATACCAC;TTCCTGACAATGAATCACGG;TGCCCTTGGTGCATTAGCAA;GCCGAGGCGGGCAGATCACG	-0.53;-0.27;0.44;0.76;0.78;1.75	36237;41266;57885;64339;64855;75411	9.22E-01;6.93E-01;8.71E-01;6.89E-01;3.96E-01;6.92E-02	2031;12587;13103;19557;36176;41205	8.61E-01;7.10E-01;1.26E+00;1.47E+00;1.15E+00;1.64E+00
HAP1	0.486395	1.03963	4	CCCGGGTCGCCGGCCAACGT;CTGAACACTGCAGCTCGCAT;CACAGCTTAGGGGCATCACA;CCGACAATTCGGACGCGCCG	0.06;0.19;0.74;0.96	49131;52077;64004;67848	9.07E-01;5.36E-01;4.07E-01;2.30E-01	9594;13438;25365;28311	4.77E-01;9.09E-01;1.02E+00;1.75E+00
TRIM5	0.486076	2.14706	16	CATAGTGAGGCGGCTCAGAG;GGTCTTTAACCAGAAGAGAG;TCACCACACGTTCCTCACAG;ACAGATGTCCAAAGCTACTG;GAACCCCTGAGCATAGACTG;TGGCCACAGTCTAGACTCAA;GTTGATCATTGTGCACGCCA;AAGAAGTCCATGCTAGACAA;TCATCTCAGATGTGGAGTGT;GGGGCTACGAATTATAGAAG;GTCAAGTTGAGCCCAGACAA;TTTCGAGCTCCTGATCTGAA;TCACCACACGTTCCTCGTGG;TGGCCACAGTCTATGCTCAG;GAGTAACTGATACCACACAC;TGGTCACCACACGTTCCTCG	-1.29;-1.03;-0.51;-0.4;0.23;0.34;0.51;0.67;0.75;0.77;0.78;0.82;0.99;1.19;1.93;2.03	25890;28855;36584;38694;52962;55593;59275;62697;64311;64643;64803;65480;68383;71025;76121;76404	1.92E+00;1.61E+00;1.84E+00;1.55E+00;2.69E+00;2.46E+00;2.42E+00;2.39E+00;2.06E+00;1.57E+00;1.15E+00;8.59E-01;7.50E-01;6.10E-01;6.76E-01;9.37E-02	1038;1321;6417;9059;11962;12639;12799;13131;14745;18167;21849;24480;38748;40858;48587;51552	7.56E-01;1.56E+00;9.85E-01;1.12E+00;1.22E+00;1.59E+00;2.12E+00;2.70E+00;3.07E+00;3.09E+00;3.12E+00;3.40E+00;2.07E+00;2.46E+00;2.26E+00;2.83E+00
MAGEH1	0.485857	0.988299	4	GGAAGACCCGAGCACTCCAG;CTGCGGCTCTCGCATTACGG;ACAGAAGAGTTTGTGCGCAG;GGGAAGTTAGGAATGCAGCC	-0.14;0.26;0.44;1.38	44241;53776;57909;72924	7.45E-01;5.68E-01;3.75E-01;1.04E-01	4518;19533;23666;33201	7.10E-01;6.71E-01;1.10E+00;1.47E+00
ERICH2	0.485856	0.989615	4	TTCTGCCATTAACTCTAGTG;CTATGAACCAGAAAATCCTG;AATGGCCCGAGAGTACCAGC;ATTTATCATCAATATCCTGA	-0.04;-0.0;0.37;1.61	46544;47328;56206;74700	8.16E-01;4.70E-01;3.77E-01;6.26E-02	2742;21236;30114;30898	8.96E-01;6.24E-01;8.42E-01;1.60E+00
VSIG10L	0.485481	1.02144	4	ACTCAAAGAGCTCTTCCCAG;GCAGACTCACGAGTTCACGG;CCGGCGCCAGACCACCAGAG;CTGTAAGGTTGAGCAGCGAG	-0.47;-0.32;1.2;1.53	37313;40344;71144;74172	5.72E-01;4.27E-01;5.98E-01;7.49E-02	3270;6298;37098;40129	8.29E-01;1.48E+00;6.40E-01;1.14E+00
DYRK1A	0.484771	1.27981	6	GGAATCTCACTCTGTCACCC;TGAGAAACACCAATTTCCGA;TTACAGGAGTACAAACCACC;TTCAACCAAAATACACCCGA;TCAGCAACCTCTAACTAACC;GCCGAGGCGGGCAGATCACG	-1.53;0.15;0.4;0.97;1.17;1.75	23634;51183;56891;68013;70780;75411	5.28E-01;1.06E+00;8.29E-01;8.79E-01;4.83E-01;6.92E-02	2031;6662;9429;20551;26259;53808	8.61E-01;1.11E+00;1.61E+00;1.40E+00;1.75E+00;9.49E-01
TNK1	0.484433	1.0407	4	AATGGTCGCACCTTCAAAGT;CCTCTGGGATCAGACACTTG;CCCAAACATCCACACGTCCG;TGGGCCTAAGTCTAAGAACT	-0.66;-0.25;1.32;1.53	33997;41799;72387;74192	5.09E-01;4.31E-01;6.71E-01;7.45E-02	3250;5055;35643;43445	8.31E-01;1.65E+00;6.77E-01;1.00E+00
KRTAP10-3	0.484429	1.01323	4	CTGGTGCAGCCTGACTGGCA;GCTGGACACACAGCTCACTG;TGGTGCAGCAAGCCGGCTGG;CCAGCGCTTACTCTGACTCC	-0.09;0.02;0.13;1.88	45173;48235;50750;75970	7.73E-01;4.80E-01;4.11E-01;3.33E-02	1472;26692;29207;32269	1.14E+00;5.14E-01;8.74E-01;1.52E+00
GREM2	0.484423	1.11453	5	CACGTGCCGCGGGATGTAGA;GCTGCCGTCCTTGTAAGGCG;TCTTGCACCAGTCACTCTTG;GCAGCAACAACTCGGAGAGA;GCCGAGGCGGGCAGATCACG	-0.75;0.36;0.53;0.53;1.75	32650;56098;59789;59892;75411	6.27E-01;9.59E-01;6.21E-01;3.92E-01;5.77E-02	2031;17550;17653;21344;44792	9.28E-01;6.24E-01;1.15E+00;1.68E+00;1.19E+00
NCLN	0.484238	1.01369	4	CCTCCACGGCAAAGTACACG;GGAGGCAAGTTTAACTACCA;GTACACGGTGAACTCGTGCG;TGGGCCACGATGACGATGGT	-0.44;0.08;1.15;1.15	37917;49609;70463;70493	5.84E-01;4.98E-01;5.66E-01;1.63E-01	6949;6979;27833;39525	5.67E-01;1.39E+00;9.25E-01;1.17E+00
AIPL1	0.483151	1.19179	5	TGCCCCGAGTGATTACCAGA;TTTATCCCCACAGCACACGG;GGACAGTCATTGACGACAGT;GCCGAGGCGGGCAGATCACG;CGTGTGGTAGGCGAACATGT	-1.13;-0.45;0.41;1.75;1.84	27686;37729;57203;75411;75817	5.16E-01;4.95E-01;5.60E-01;9.29E-01;4.60E-02	1625;2031;20239;39713;49756	1.02E+00;2.20E+00;1.01E+00;7.73E-01;9.61E-01
ALDH5A1	0.483091	1.02993	4	GGGCATGGTAGCCGACTGCG;TAATGTCTCCGTAAACACGG;GGCACTGGGGAAATTCCACT;AGTATTTGACAGTGCCAACG	-0.49;0.49;0.93;1.0	37019;58873;67393;68538	5.66E-01;7.00E-01;4.66E-01;2.12E-01	8904;10049;18569;40423	4.96E-01;1.12E+00;1.38E+00;1.13E+00
GPR25	0.482837	1.38131	4	CAACCCCCGGTAGACCAGGG;CGCCTCGAGCAGCTTCACCA;GGCCAGCAGCCACACCACAA;GGGATGTAGACGTAGCCGTA	-2.58;0.28;1.64;2.59	14118;54202;74888;77159	3.99E-01;5.77E-01;9.24E-01;6.34E-03	283;2554;23240;63324	1.84E+00;2.21E+00;1.12E+00;3.50E-01
RNF26	0.48271	0.970152	4	GTCTTCGAGAGGATGTCATG;AGAGGTTCTGAGTGCCGATG;AGCAGGGAGATACTGCACCG;AGACTAGTCAGTACCGTGTG	-0.6;0.19;0.79;1.54	35167;52168;65039;74238	5.29E-01;5.38E-01;4.21E-01;7.34E-02	3204;12403;25274;42275	8.36E-01;9.64E-01;1.03E+00;1.05E+00
SH3GLB1	0.482584	1.04662	4	CTGTGCATAGTAAGTCATCT;GATTACCAGACTTCTGCTAG;GACAATATATGATTGATGCA;GTACCTGCACGGCGCGACTG	0.15;0.24;0.52;1.02	51187;53335;59545;68801	9.87E-01;5.59E-01;3.77E-01;2.06E-01	8641;17897;24107;26255	5.04E-01;7.22E-01;1.08E+00;1.88E+00
NCAPH2	0.482327	1.41324	8	GGCATGGGGGAAACGCCCGC;TAGACTCCAAGGAGTCAAAG;CGCTGCAAGGCTGACTTCCG;CACCTTCTTACTGTAGACGC;CCCTGACTCCCGGACTAACG;AAGCCAGGACCTCAGATGCA;GGGTCCACAGTGATGAAGAC;GCTGATCACAGGCCTGTTCG	-0.97;-0.37;0.35;0.48;0.68;0.85;1.33;1.5	29561;39427;55890;58705;62914;66106;72510;73919	9.77E-01;9.93E-01;1.45E+00;1.10E+00;8.83E-01;6.34E-01;4.93E-01;1.62E-01	3523;4932;11336;14528;18737;21552;38015;47881	5.80E-01;1.12E+00;1.10E+00;1.42E+00;1.69E+00;2.17E+00;1.55E+00;1.67E+00
RNF220	0.481828	1.14138	5	TCGCCCAAGCTAGAGTGCAG;CATCAACCTTTAGTGAACCG;TGCTGAATCATAGTGGTGTG;CCGATGGTACATAGAGGCAA;GTTGGCTCGTACTCGCAGAA	-1.41;0.17;0.22;0.53;2.89	24742;51636;52860;59868;77298	4.65E-01;7.84E-01;4.94E-01;3.92E-01;4.01E-03	144;17574;24582;25806;52705	2.03E+00;6.24E-01;8.27E-01;1.39E+00;8.36E-01
LOC645752	0.481761	1.22223	5	CGGTGGTTGCCACTCACCTG;AGCGTATTCAAGAATTGGAG;AAAACAAGTCCAGCTAGAGC;GGGAAAGCTCCAATCCCAGG;TTGTAGCTGTTCCACCACAG	-1.53;0.55;0.59;1.17;1.63	23585;60154;61038;70763;74823	4.48E-01;1.17E+00;6.58E-01;5.22E-01;7.47E-02	2619;6679;16404;17288;53852	8.32E-01;1.25E+00;1.23E+00;2.02E+00;7.89E-01
PCBD2	0.481646	1.07059	5	CAAGGCAGGCAGATCACCTG;TTGACCTTAAAGCAGCAGGA;AGGCCAGAGCCTAGGGCTAG;CTTTAAGGTCAAGTATAGCT;CATAGTCATCAGGTACTCAC	-0.53;-0.47;0.54;0.81;2.06	36237;37423;60044;65336;76458	7.27E-01;4.92E-01;6.28E-01;4.02E-01;2.77E-02	984;12106;17398;40019;41205	1.22E+00;8.33E-01;1.17E+00;7.64E-01;1.37E+00
TMEM221	0.481454	1.06869	5	GCGAGGTCGTCTTCAAAGGA;CTCGATCTCGAAAAGTAGCA;CCCCAGCACGAGCACCAGCG;CTGCCGCCTCCTCAGACATG;GCCGAGGCGGGCAGATCACG	-0.56;-0.22;0.65;0.79;1.75	35784;42428;62248;64986;75411	7.13E-01;5.57E-01;6.99E-01;3.99E-01;5.77E-02	2031;12456;15194;35014;41658	9.28E-01;8.16E-01;1.31E+00;9.41E-01;1.35E+00
SP140L	0.481078	0.97833	4	TGATGAGTTCCCGATCGCGG;TTTGGAAGCACTGTTCAGCG;AAGGAAAGTGACCAAGCATG;CCAGATAACAGCAAAGCCGA	-0.64;-0.15;0.84;1.87	34498;43929;65908;75947	5.17E-01;4.42E-01;4.35E-01;3.38E-02	1495;11534;33513;42944	1.14E+00;1.02E+00;7.35E-01;1.02E+00
LOC729835	0.48091	0.617036	1	AACTTTAAGACTGCTGTGAA	0.48	58738	0.12	18704	0.617
RILPL2	0.480379	1.09894	5	CCTGGGCCCAAACAAAATGG;AAGCTCGCGGCCCAACAGGT;AGCTCCTGCAGAGTGAAGCG;CTGGAGGCGCTGGTGAATGA;GCCGAGGCGGGCAGATCACG	-1.02;0.21;0.51;0.96;1.75	28983;52604;59271;67797;75411	5.42E-01;8.18E-01;6.08E-01;4.37E-01;5.77E-02	2031;9645;18171;24837;48459	9.28E-01;9.83E-01;1.12E+00;1.44E+00;1.02E+00
SLC24A1	0.48004	0.987537	4	AAACCTAGCTCCGAAATGGG;CCTGACCGTAGGGGTTGTTG;GAAGTGGAACAAGCATATCG;CCCCCCAGATCTGTTCAGTG	-0.14;0.27;0.36;1.42	44270;54003;56057;73347	7.45E-01;5.73E-01;3.78E-01;9.44E-02	4095;21385;23439;33172	7.45E-01;6.20E-01;1.11E+00;1.47E+00
TNNT1	0.478398	1.0002	4	TCGATGTACATTTCGAGCAG;CGAACGTCAGGCTAAGCTGG;AGCGTGGTAAGCGGCAGACG;AAGAGGAACGCCCCAAACCA	-0.52;0.55;0.6;1.29	36402;60146;61179;72138	5.53E-01;7.43E-01;3.83E-01;1.23E-01	5304;16263;17296;41040	6.55E-01;7.82E-01;1.46E+00;1.10E+00
ZNF189	0.478142	1.11728	5	GTAGGTTAGATAAACAAAGA;AAGGTATGTGCTTAATCGAA;GTTGAATGAAATGGGCCTTG;AGACAAGCCCCATAAATGTG;CAGCATCAGAGAATTCACAC	-0.67;0.24;0.52;1.12;1.17	33978;53279;59622;70153;70779	6.62E-01;8.42E-01;6.17E-01;4.99E-01;1.95E-01	6663;7289;17820;24163;43464	5.23E-01;1.18E+00;1.14E+00;1.49E+00;1.25E+00
SLC17A6	0.477385	1.11639	4	AACAACAGCACCATCCACCG;TGATGGCGATAATGTAGCGG;CGGGAGGCTACATCGCGTCT;CTATTACAGATGAAGAACGT	-1.51;0.62;0.96;1.83	23810;61655;67915;75812	3.89E-01;8.01E-01;4.79E-01;3.69E-02	1630;9527;15787;53632	1.10E+00;1.16E+00;1.57E+00;6.38E-01
ALDH3A1	0.476966	1.01503	4	AGGGAAGAGTCCCTGCTACG;GGAGGTGGTGTACGTCCTAG;TTCTCCACAGGAGTTCTACG;CTGTACCCAGTAATCAATGG	-0.4;-0.18;1.22;1.26	38707;43351;71371;71791	6.02E-01;4.38E-01;6.10E-01;1.32E-01	5651;6071;34091;38735	6.33E-01;1.50E+00;7.19E-01;1.20E+00
SCNN1D	0.476367	0.963155	4	TGTGTGACGGGAACCCACGT;GCCTCAAGACGACGTCCTGG;GGCAGCTGCTACACGGTCGA;CCGAGGCTACACGTCAGGCG	-0.21;-0.17;0.58;1.71	42533;43590;60790;75206	6.96E-01;4.40E-01;3.81E-01;5.09E-02	2236;16652;33852;34909	9.76E-01;7.67E-01;7.26E-01;1.38E+00
ZNF706	0.475779	0.966554	4	GCTGGACAAAAGAAGAAACA;TGCTTGAAGGTCTTAGGGTC;GAAACAAGGACATGACCAAA;CCTTACCCTACAGACAGTGC	-0.28;-0.02;0.39;1.82	41052;46889;56675;75763	6.58E-01;4.66E-01;3.76E-01;3.81E-02	1679;20767;30553;36390	1.09E+00;6.36E-01;8.28E-01;1.31E+00
SMARCC1	0.475749	1.58191	7	GAGAATCGCTTGAATCCGGG;GGAATCTCACTCTGTCACCC;GGATGATTGGAACAAAGTGT;TGTTAAAGGAGGAACTGTAG;TATTCTTCCTCACAAGACGA;GCCGAGGCGGGCAGATCACG;ATCTCGAATGGATCGTAATG	-1.64;-1.53;0.39;0.6;1.72;1.75;2.05	22685;23634;56636;61174;75242;75411;76445	5.91E-01;4.99E-01;1.15E+00;8.99E-01;1.83E+00;8.06E-01;3.94E-02	997;2031;2200;16269;20806;53808;54757	1.08E+00;1.90E+00;3.15E+00;1.47E+00;1.80E+00;6.19E-01;1.05E+00
DYNLL1P1	0.474816	0.614144	1	CATTGCGGCTCATATCAAGA	0.47	58613	0.121	18829	0.614
[truncated: 21,974 more rows]
