# Supplementary material for: A GPX4-dependent cancer cell state underlies the clear-cell morphology and confers sensitivity to ferroptosis
Source: Nat Commun. 2019 Apr 8;10:1617. doi: 10.1038/s41467-019-09277-9 (PMC6453886; doi:10.1038/s41467-019-09277-9)
Supplement: Supplementary file 6 — Supplementary Data 3 [file 41467_2019_9277_MOESM6_ESM.xlsx]

## Sheet: Table S3.CRISPR.screen.day8
Supplementary Data 3	CRISPR screen analysis of day 8 ML210 vs DMSO-treated conditions
Gene Symbol	Average LFC	Average -log(p-values)	Number of perturbations	Perturbations	Individual LFCs	Ascending ranks	Individual ascending -log(p-values)	Descending ranks	Individual descending -log(p-values)
ATRX	-0.327754	0.63353	7	GGAATCTCACTCTGTCACCC;GCCGAGGCGGGCAGATCACG;AATTAGTGCGGAATAAGAGT;CAAGGCAGGCAGATCACCTG;GAAAATCTCAAAAAACGCGG;ATGATTTAAAGACTCAGGCG;CTTACCAAGGCCCATACAGT	-1.53;-1.31;-1.15;-0.53;0.26;0.63;1.34	17134;20055;22485;35879;58168;66171;74327	4.62E-01;5.02E-01;6.63E-01;6.03E-01;5.07E-01;4.02E-01;1.25E-01	3115;11271;19274;41563;54957;57387;60308	6.57E-01;6.93E-01;7.65E-01;5.39E-01;4.97E-01;5.23E-01;7.60E-01
LOC107986700	-0.533336	0.334131	1	CAAGGCAGGCAGATCACCTG	-0.53	35879	0.334	41563	0.27
TCOF1	-1.3071	0.92154	4	TTAGGGTCGACAAAAATCAG;CAGTTGCCAAGGCCCAGGCG;GACCAACGTAGTATTTGCTG;GACAGGTCTTGCAGTAACCG	-1.75;-1.68;-1.53;-0.26	14770;15406;17073;43556	3.93E-01;8.17E-01;1.48E+00;1.00E+00	33886;60369;62036;62672	5.07E-01;7.52E-01;3.88E-01;3.68E-01
NSRP1	-1.35917	0.968051	6	CTTCGATGCTAAGAGCAGTG;CTGAAGGCTTTCACTCACAG;GAGAATCGCTTGAATCCGGG;GGATTCTCATAGGCACAGAG;CAAGGCAGGCAGATCACCTG;AGTACCAGGCACCACACGAA	-3.01;-1.69;-1.64;-1.49;-0.53;0.22	5149;15310;15856;17554;35879;57122	5.48E-01;6.15E-01;1.06E+00;1.63E+00;1.16E+00;7.93E-01	20320;41563;59888;61585;62132;72285	4.64E-01;7.01E-01;9.68E-01;5.99E-01;4.04E-01;1.80E-01
SPPL3	-1.51817	1.10141	6	CACCATCCATGAGAAGCCAA;AGACAGATGCTCCAATTGGA;GCCGAGGCGGGCAGATCACG;GAAACGTCCACAGCAACCAA;CAAGGCAGGCAGATCACCTG;GCTTCCGGGATAGAACGTCA	-3.16;-3.03;-1.31;-0.58;-0.53;-0.49	4119;5001;20055;34633;35879;36999	6.15E-01;1.32E+00;8.50E-01;7.37E-01;1.16E+00;1.92E+00	40443;41563;42809;57387;72448;73329	1.11E+00;7.01E-01;5.20E-01;5.18E-01;5.57E-01;1.42E-01
OPA3	-0.45826	0.703706	6	ATGGCGAAGCTGCTATACTT;GGTCATCAAGCCGCTGAACG;GGAATCTCACTCTGTCACCC;CAAGGCAGGCAGATCACCTG;GCTTGCCAACCGTATTAAGG;CCCCGCAGTGTATCACTGGG	-1.87;-1.74;-1.53;-0.53;0.89;2.03	13689;14825;17134;35879;70379;76500	3.97E-01;6.29E-01;9.90E-01;7.01E-01;4.70E-01;3.19E-02	942;7062;41563;60308;62617;63753	1.16E+00;1.07E+00;5.12E-01;5.69E-01;4.01E-01;5.07E-01
OPA1	-0.533767	0.505197	4	AAAAGCAGTCTGATACTGCA;ATACGCAAGATCATCTGCCA;ATACTTACATTAATCACACC;TCAGTGGAAAGATATGATAC	-1.88;-1.43;0.42;0.76	13568;18351;62018;68464	4.05E-01;7.07E-01;3.88E-01;2.14E-01	8978;15424;59091;63874	4.94E-01;8.16E-01;3.76E-01;3.35E-01
RNF219-AS1	-0.179512	0.764129	7	ACGGCACGCTGTTCATCGTG;CAAGGCAGGCAGATCACCTG;GTCCATCTGCGACTCGGACA;TCCTGCCTCAGCCTCCCGAG;TGAAGGCAACTAAGGGACAA;GATGTGGTCCAGCAGATCGC;CACCCGCATATGCACAGCCT	-0.87;-0.53;-0.4;-0.4;-0.0;0.18;0.77	28041;35879;39448;39519;50759;56170;68614	7.68E-01;6.97E-01;5.72E-01;5.55E-01;5.21E-01;5.53E-01;3.68E-01	8828;21272;26683;37923;37994;41563;49401	4.13E-01;4.97E-01;5.78E-01;5.73E-01;8.10E-01;1.11E+00;1.37E+00
LOC105369748	-0.480368	0.488659	5	TGTCAAAGGCTTCGTAGCAG;CCAGCGGGCAACAGGCCATG;CAAGGCAGGCAGATCACCTG;ACTAACCGTGGTCACTACAC;ATGTAATGAGAAATTTAACC	-1.59;-0.82;-0.53;-0.19;0.74	16378;29043;35879;45409;68084	3.88E-01;4.64E-01;5.43E-01;6.12E-01;2.80E-01	9358;32033;41563;48399;61064	4.43E-01;4.62E-01;4.79E-01;5.44E-01;5.16E-01
ITGA8	-1.24195	0.763878	5	CGGGTCGGGCGACTTACGTG;ATAGACAAGAATGATTACCC;GAGAATCGCTTGAATCCGGG;TCGAGTTCAAATCCAATCAG;GTTAACATCTGATACGACAA	-3.73;-1.65;-1.64;0.15;0.66	1243;15744;15856;55431;66758	1.12E+00;6.80E-01;1.27E+00;4.28E-01;3.22E-01	10684;22011;61585;61698;76202	4.19E-01;5.28E-01;6.76E-01;3.88E-01;3.50E-02
ITGA9	0.085075	0.854887	4	GTCCTGCGGAAAGACCTGCC;GTATAAGAAGAAGTACGGAG;GGAAACATTGAAGGACACGT;CCTGAGAAGAACCACGCTGT	-0.22;-0.02;0.11;0.47	44583;50397;54165;63250	7.55E-01;5.09E-01;3.86E-01;3.52E-01	14192;23277;27045;32859	3.99E-01;5.76E-01;9.55E-01;1.49E+00
ITGA1	-1.31013	1.0087	9	AGAATGAGTATGTCAAGATG;TGACTAAGCAGATATGGGCG;GGCTTGAGAGTCGAAGTCGA;GCCGAGGCGGGCAGATCACG;ACAGCGTATTCCATCAGGTG;GGTAGATCCAACTTTACACA;ACTGCTCCCTCACAAATCCT;TGCAACAAGTACCTCTTCGG;TGGCCTGTATGATTGTACCG	-3.94;-3.12;-3.12;-1.31;-1.25;-0.9;0.23;0.23;1.37	721;4365;4412;20055;20943;27345;57455;57492;74498	1.11E+00;1.12E+00;1.96E+00;8.97E-01;1.29E+00;1.36E+00;5.28E-01;6.70E-01;1.51E-01	2944;19950;19987;50097;56499;57387;73028;73081;76721	6.00E-01;5.27E-01;6.18E-01;9.17E-01;8.56E-01;6.17E-01;1.11E+00;4.97E-01;3.65E-02
ITGA2	-1.00907	0.644556	6	TGGGAATCAGTATTACACAA;GCAACCATGACAATATACTG;TCGCCCAAGCTAGAGTGCAG;TCCTGCCTCAGCCTCCCGAG;GACATCAGTCTGGAAAACCC;AAAGGCACCAATAGACACAT	-3.54;-1.54;-1.41;-0.4;-0.08;0.92	1966;17010;18711;39519;48656;70640	8.73E-01;5.71E-01;9.10E-01;6.13E-01;6.61E-01;2.40E-01	6802;28786;37923;58730;60432;75476	4.78E-01;4.91E-01;5.06E-01;5.38E-01;4.19E-01;6.70E-02
ITGA3	-0.505912	0.466271	4	CTTCTACCCAGACCTTCTAG;GGCACTCACGGGGCGCACTG;TGCTATTGCACATCTCGTTG;GTACACAGCACCAGTCCGGT	-1.49;-1.35;0.02;0.8	17560;19468;51692;69103	3.77E-01;6.73E-01;4.03E-01;1.98E-01	8339;25750;57974;59882	5.14E-01;5.29E-01;3.75E-01;4.47E-01
ITGA4	-0.278646	0.63721	4	CATATTTGTCACTTCCAACG;AGTTCCAATACCTACCACGA;ATCATCTCCAGCATTAAACA;CTCACCATCGGTTCGCCCCG	-1.8;-1.05;-0.36;2.1	14314;24202;40704;76597	3.97E-01;5.58E-01;5.60E-01;1.90E-02	845;36738;53240;63128	1.37E+00;4.28E-01;3.91E-01;3.55E-01
ITGA5	-0.404521	0.583567	4	TGGATCGGACCCCTGACGGG;AATTCGGGTGAAGTTATCTG;CCCCGAGTACCTGATCAACC;CACTAGCGGACACGATGGGG	-0.66;-0.51;-0.49;0.04	32681;36593;36995;52373	4.87E-01;4.29E-01;6.43E-01;6.79E-01	25069;40447;40849;44761	3.97E-01;4.28E-01;5.57E-01;9.52E-01
ITGA6	-2.36962	1.82214	5	AGATGGCGATGACGCCCATG;TTTCCAGTTATAAGTACCCG;GGAGCTCCGTATGATGACTT;GCCGAGGCGGGCAGATCACG;CGGATCGAGTTTGATAACGA	-3.87;-2.86;-2.64;-1.31;-1.17	876;6287;7980;20055;22148	1.27E+00;1.29E+00;2.06E+00;1.78E+00;2.72E+00	55294;57387;69478;71153;76561	1.62E+00;1.02E+00;1.12E+00;5.39E-01;2.48E-02
ITGA7	-0.374677	0.504582	4	TACAGAGTGGACATCGACCA;CTGTACCCGGGTCAGCGACA;CGGCTCAGGAACGTCACACG;TTGGCGCTCAAAGAAGTAGG	-1.2;-0.46;-0.46;0.62	21696;37844;37909;66078	3.79E-01;4.26E-01;6.21E-01;2.76E-01	11364;39533;39598;55746	4.38E-01;4.26E-01;5.83E-01;5.71E-01
TRHR	-1.64884	0.903957	4	TCCAACATAGCCATAGACCC;TCATGAGAACCAAGCACATG;GATGCTATTGTGATATCCTG;AAAGGCTGTTATTGAACAAG	-3.61;-2.49;-0.74;0.24	1687;9000;30871;57685	1.09E+00;1.20E+00;8.17E-01;5.12E-01	19757;46571;68442;75755	3.75E-01;4.62E-01;4.94E-01;3.82E-02
UFSP1	-0.152014	0.660825	4	CCTTGCTGGGAGTCTGCGTA;AGGGTCCAATACCAGGACAT;CGCCTCTGCCACGTACCCCG;GCTTTACTCGCACTTCGCAG	-0.46;-0.4;-0.33;0.57	37846;39646;41632;65237	5.83E-01;4.26E-01;5.42E-01;2.98E-01	12205;35810;37796;39596	4.24E-01;4.31E-01;6.23E-01;1.17E+00
UFSP2	-1.16816	0.77114	4	ATATAGATTTATGTGGTCCA;GCCATATATACACTGAACTG;TCATAATCAACTAACTGACA;AGCTAGCTACTCCTAATGGT	-4.1;-0.57;-0.43;0.43	420;34930;38663;62364	1.67E+00;4.34E-01;6.03E-01;3.76E-01	15078;38779;42512;77022	3.91E-01;4.26E-01;5.25E-01;9.42E-03
LOC107987079	-1.30793	0.586748	1	GCCGAGGCGGGCAGATCACG	-1.31	20055	0.587	57387	0.13
LOC107987075	-1.40634	0.616874	1	TCGCCCAAGCTAGAGTGCAG	-1.41	18711	0.617	58730	0.12
TEX28P2	-0.917681	0.577257	4	CAGGAGGAGAAGTGTAGGTG;ACAACTTACAGGATAGTGTC;AAGCGACTCTCCAAGATGAA;GGAGTCCTATCACAGCCTAA	-3.73;-0.82;0.15;0.73	1219;29082;55259;68020	1.22E+00;4.82E-01;3.81E-01;2.25E-01	9422;22183;48360;76222	4.82E-01;6.01E-01;4.37E-01;2.76E-02
TEX28P1	-0.917681	0.577257	4	CAGGAGGAGAAGTGTAGGTG;ACAACTTACAGGATAGTGTC;AAGCGACTCTCCAAGATGAA;GGAGTCCTATCACAGCCTAA	-3.73;-0.82;0.15;0.73	1219;29082;55259;68020	1.22E+00;4.82E-01;3.81E-01;2.25E-01	9422;22183;48360;76222	4.82E-01;6.01E-01;4.37E-01;2.76E-02
FAM212B	-0.625611	0.462801	5	CTCTGCCACCCTCCCAACAA;GCCGAGGCGGGCAGATCACG;GACTTGCCAGAACTGGAGAA;TCGACAGCCTCTGGTGTTAG;GCACCAAGTTTCCATCCCAT	-2.52;-1.31;-0.54;0.42;0.81	8826;20055;35830;62105;69225	4.54E-01;5.64E-01;5.44E-01;3.88E-01;2.44E-01	8217;15337;41612;57387;68616	4.70E-01;6.94E-01;4.79E-01;4.08E-01;2.63E-01
FAM212A	-0.156358	0.71399	4	GTCAGGCAGCACATGGCGAG;GTGTCCCGACCACACAACTG;ACAGCAGCCCTACTGAACAG;GAGAGGCACTGCCTACGAAG	-1.83;0.27;0.29;0.64	14006;58568;59076;66381	4.01E-01;6.91E-01;3.76E-01;2.68E-01	11061;18366;18874;63436	4.44E-01;7.07E-01;1.36E+00;3.47E-01
CHST9	-0.866315	0.594234	5	AAGTTGATTGAAAAACGTCA;GCCGAGGCGGGCAGATCACG;AGACTTGCAAATACATGAAG;ACACAAAATCTTATATTGTG;GGGGACCAGTGAAGTACTTG	-2.22;-1.31;-0.74;-0.23;0.17	10896;20055;30697;44284;55931	4.16E-01;5.64E-01;6.44E-01;6.40E-01;7.07E-01	21511;33158;46745;57387;66546	4.23E-01;4.65E-01;4.61E-01;4.08E-01;3.29E-01
CHST8	-0.648646	0.726947	6	AAGATACGGGACACGTGGCG;GGAATCTCACTCTGTCACCC;CACTCGGGACTTATCCAGTG;CTGGACACCTTCGACCGCCA;CAAGGCAGGCAGATCACCTG;TAAAGTTCAACATCAGGCCA	-1.55;-1.53;-1.32;-1.2;-0.53;2.24	16855;17134;19955;21650;35879;76758	4.17E-01;5.69E-01;8.54E-01;1.32E+00;1.16E+00;2.31E-02	684;41563;55792;57487;60308;60587	1.30E+00;7.01E-01;7.87E-01;5.19E-01;4.20E-01;6.40E-01
CHST1	-1.47244	0.888125	4	ACCGACAGGATCTTCCGCCG;GCGAAGCCAGAATGCCGCGG;TGGCGCCTAGCATGACCCGC;CGGGCTACTCAACCTGACCG	-4.11;-1.94;-0.64;0.8	411;13114;33047;69102	1.68E+00;9.25E-01;7.49E-01;1.98E-01	8340;44395;64328;77031	5.14E-01;4.45E-01;4.11E-01;9.22E-03
CHST3	-1.24316	0.727565	4	GAAGAACTCGCCCACGAACG;GAGCACGTCGCGGTACACCA;ACTCAGTTCATGTTCCGCCG;CACTGCAAGAACCGCCGCTG	-3.29;-1.09;-0.4;-0.2	3305;23534;39552;45317	8.25E-01;5.71E-01;5.84E-01;9.31E-01	32125;37890;53908;74134	4.78E-01;4.26E-01;3.87E-01;7.58E-02
CHST2	-0.252562	0.603343	4	GAACACCTTCATTCCGAGAG;TGGTGTACGTGTTCACCACG;ATGGCAAAAACTGTATCCGG;TCCGTGAACTCGCCACCGCG	-0.66;-0.64;0.13;0.16	32620;33198;54756;55719	4.86E-01;4.44E-01;3.83E-01;5.72E-01	21723;22686;44244;44822	3.79E-01;5.89E-01;4.95E-01;9.50E-01
SPDYE12P	-1.69361	0.741932	2	TAGATCCCAGCCCCCCACGT;CGTGCTCCCTGAGTACTACG	-3.2;-0.19	3873;45512	1.02E+00;4.62E-01	31930;73567	3.15E-01;4.46E-02
CHST4	-0.489748	0.633143	5	CACCTGAACCTGGGAGACAG;TGATGTTGTGGCTGTACATG;CCTGCATCACATAGTAGGGT;CCGGGGACCAGGTTCCATGT;CAGTCAACAGCCCTTTGAGG	-3.23;-0.81;0.44;0.5;0.64	3622;29272;62556;63874;66482	7.14E-01;4.64E-01;7.11E-01;3.92E-01;3.31E-01	10960;13567;14886;48170;73814	4.15E-01;7.64E-01;1.33E+00;5.48E-01;1.04E-01
CHST7	-0.526556	0.491365	4	GTCCCCTCCGTATTGGACGG;TGACCTTGTTAGTCCGCCAG;GGGCGCGTATCGCCACGGGT;GCTGGTTAAAGAGTTCGCCC	-2.61;-0.17;-0.03;0.7	8175;45988;50074;67529	5.20E-01;4.57E-01;4.18E-01;2.38E-01	9913;27368;31454;69254	4.69E-01;5.04E-01;7.98E-01;1.94E-01
CHST6	-0.260033	0.595935	5	TAGCCACGTACGCATCGCCG;CAAGGCAGGCAGATCACCTG;GGTGGTCCACACGTGCCACG;CAAACACGTCCATGTCGCAC;GCTGGGCACCAACGGCACGT	-1.2;-0.53;-0.1;-0.03;0.57	21704;35879;48111;49926;65102	4.25E-01;4.79E-01;4.63E-01;5.13E-01;3.77E-01	12340;27516;29331;41563;55738	4.00E-01;4.71E-01;6.78E-01;7.16E-01;7.14E-01
ITGAX	-0.141829	0.612992	4	ACAGCTGCCAACCAAACGGG;GCTGACAGACGTGGTCATCG;GCTGCAAGGGTTTACATACA;AGGTAGGGCTCATATTTGGG	-0.66;-0.6;0.01;0.68	32667;34292;51455;67191	4.87E-01;4.37E-01;4.05E-01;2.47E-01	10251;25987;43150;44775	4.61E-01;5.25E-01;5.14E-01;9.52E-01
RPS4XP3	-2.74176	1.03497	1	TGTACATCGTATTACACCTG	-2.74	7145	1.03	70297	0.042
BCL2A1	-0.618393	0.660094	6	GAAGACGGCATCATTAACTG;AGCAATACTGTTGACCAGAA;CTGGTCAACAGTATTGCTTC;AACACTATTCAACCAAGTGA;GTCCTACAGATACCACAACC;CTTATAGGTATCCACATCCG	-1.84;-0.62;-0.56;-0.42;-0.38;0.12	13890;33604;35214;38894;40064;54526	3.97E-01;5.38E-01;5.16E-01;6.26E-01;9.69E-01;9.14E-01	22916;37378;38548;42228;43838;63552	5.13E-01;6.02E-01;5.05E-01;5.62E-01;8.20E-01;5.15E-01
ITGAV	-1.3622	0.968733	5	GCACCTCTCTTCATGGATCG;AACGATGAGCTCAGCTTCGT;AGAACATGACTATTTCAAGG;CAAGGCAGGCAGATCACCTG;AGGCAATAGAGATTATGCCA	-2.36;-1.95;-1.5;-0.53;-0.46	9873;12941;17418;35879;38002	4.32E-01;7.92E-01;1.17E+00;9.08E-01;1.55E+00	39440;41563;60024;64501;67569	8.31E-01;5.43E-01;6.28E-01;3.96E-01;2.96E-01
ITGAL	0.390497	1.02691	4	GCCACCGGACCAGAAGACGG;TCTGGCGGAAGAGGTAACAC;GGAGCTGTGTGGCGTCGACG;CCAGGTCACGGTGTAACCTG	-0.51;0.03;0.71;1.33	36448;52059;67675;74282	5.54E-01;5.36E-01;4.73E-01;7.24E-02	3160;9767;25383;40994	8.41E-01;1.14E+00;1.02E+00;1.11E+00
ITGAM	0.370985	1.14272	4	AGTTCAGGCGCAGCACAATG;TCATCCGCCGAAAGTCATGT;ATTTGAGTGTAATGATCAGG;TGGAACACGTGATCACGAGG	-0.22;0.47;0.52;0.72	44665;63148;64104;67777	7.57E-01;8.67E-01;4.08E-01;2.32E-01	9665;13338;14294;32777	4.75E-01;9.14E-01;1.69E+00;1.49E+00
ITGAD	0.722657	1.69596	4	CTTCAGCACAGCCCTCACAA;GGCGCACCCCGATAGCGTAG;TGGCGGCCAACCAGACGGGA;CACGAGAAGTCAGACGACCT	0.5;0.52;0.88;0.99	63804;64201;70193;71583	1.74E+00;9.19E-01;5.55E-01;1.37E-01	5859;7249;13241;13638	6.22E-01;1.36E+00;1.78E+00;3.02E+00
ITGAE	-0.0462653	1.16308	9	GTCTGTCAAGCACAGGCAAG;GAGAATCGCTTGAATCCGGG;GCCCCATGATGTTTGTACCG;TAAGAGTGCTAGGACTGCGA;TCCAGAACATCACTCAAGTG;GTATATCTACAATGGACACT;GCAGCCTCAGCCGTCCCGAG;TGGAGAGAACTAGATCAAGC;GCTTAGCAAATACATAGAGG	-2.83;-1.64;-1.02;-0.02;0.14;0.93;1.17;1.34;1.51	6510;15856;24786;50287;55090;70891;73212;74333;75125	4.26E-01;5.18E-01;5.65E-01;9.25E-01;7.98E-01;1.52E+00;1.14E+00;5.85E-01;1.19E-01	2317;3109;4230;6551;22352;27155;52656;61585;70923	6.75E-01;1.36E+00;2.01E+00;2.38E+00;1.19E+00;1.37E+00;6.06E-01;5.30E-01;3.44E-01
LOC107984670	0.278881	0.616688	1	TACCGAAGTCAATGTCGAGG	0.28	58723	0.12	18719	0.617
LOC107984671	-0.567325	0.691045	12	TACTCTTTGAATTCTCGACT;GCATTGTCTGCAAAAATCGT;TGTATACACACAGCCTGCAA;TCTGTACAAGCAGTGTGCAT;AAAGATTTGGGGCATACTCT;CTTCCGAAATGCATATGTAT;CAATGCAACAGGGCAATGAG;ACATGTTTATCTATATCTCA;ATGCACTAGTGACAACTGGA;TTACTGCTGCTGGTTCTATG;AATTTCAAACCAGTGAGCCT;GTGCATGCATCAATGAGAAG	-2.9;-1.61;-1.42;-1.32;-1.01;-0.9;-0.82;-0.44;0.36;0.63;1.17;1.45	5956;16207;18484;19947;24995;27327;28973;38357;60783;66192;73184;74861	4.17E-01;5.59E-01;5.90E-01;6.97E-01;7.42E-01;8.83E-01;1.11E+00;9.34E-01;6.06E-01;5.38E-01;4.51E-01;1.77E-01	2581;4258;11250;16659;39085;48469;50115;52447;57495;58958;61235;71488	5.60E-01;9.46E-01;7.85E-01;8.16E-01;7.22E-01;8.17E-01;6.86E-01;6.24E-01;5.89E-01;6.09E-01;7.22E-01;4.17E-01
LOC101928957	-1.52854	0.655112	1	GGAATCTCACTCTGTCACCC	-1.53	17134	0.655	60308	0.109
LOC101928953	-1.12182	0.759968	6	CCAGCGTGGCCGAGTAGAGT;TGACACAGAGCGCACGAGGG;AGCCGCCAACGGGTTCAGCG;GAGACTGCCATGGCCGACCG;CCATGCCCAGCCTACCACGA;CGCACTCACCTGGCCCCAGT	-3.46;-1.63;-0.87;-0.64;-0.57;0.45	2357;15943;27906;33028;34949;62736	8.06E-01;5.97E-01;6.11E-01;7.87E-01;1.21E+00;5.49E-01	14706;42492;44414;49536;61499;75085	4.01E-01;7.27E-01;5.34E-01;4.87E-01;4.09E-01;8.05E-02
IGF2R	0.260945	0.944779	4	GTGTGCACTACTTTGAGTGG;GCTCAAAGATCCATTCGCCG;TTCTGTCTTAGACAGCACAC;TAATCCACTCAATTTCATAG	-0.44;-0.32;0.84;0.97	38375;41802;69643;71289	5.94E-01;4.31E-01;5.33E-01;1.44E-01	6153;7799;35640;39067	6.06E-01;1.31E+00;6.77E-01;1.19E+00
SLC36A4	0.177235	0.879275	4	AAGCGTTGAATATTGGCATG;ACTGACAGCCATGGAAACGT;AGAGAAGAAGTGTTGACCTA;TACCAACTTGATGATCAAGA	-1.45;0.18;0.47;1.5	18198;56308;63060;75121	3.76E-01;6.27E-01;3.97E-01;5.28E-02	2321;14382;21134;59245	9.61E-01;8.63E-01;1.23E+00;4.65E-01
SLC36A3	-0.719731	0.455278	4	TCATCCTCTATATCTTACTG;TGAAATGCAACATTGGCACA;CAGAGCCATGCTCCCAAGGG;GGTTTCAAGGCCGTACATCG	-2.02;-1.3;-0.26;0.7	12439;20136;43441;67494	4.20E-01;6.53E-01;5.09E-01;2.39E-01	9948;34001;57306;65003	4.68E-01;4.39E-01;3.75E-01;3.04E-01
CKS1B	-1.51116	1.0591	4	CAGACATGTCATGCTGCCCA;TTCAGATTCAGACATCAGAT;ACGACGAGGAGTTTGAGTAT;TTCGGACAAATACGACGACG	-4.4;-0.86;-0.69;-0.08	139;28060;31835;48592	2.15E+00;4.94E-01;7.86E-01;8.10E-01	28850;45607;49382;77303	4.34E-01;4.54E-01;4.25E-01;3.10E-03
SLC36A1	-0.290078	0.648633	6	GAGAATCGCTTGAATCCGGG;TCCTGCCTCAGCCTCCCGAG;GCTTTGACCAAAGCGCTGGT;CCTGCTGATCATAGGCATCG;AGTATCACCATAATCCACAA;AGGATGAGTGGGAACTTCCG	-1.64;-0.4;-0.23;-0.19;0.17;0.56	15856;39519;44479;45407;55777;64885	4.08E-01;6.49E-01;5.34E-01;5.18E-01;4.88E-01;4.61E-01	12557;21665;32035;32963;37923;61585	3.96E-01;5.00E-01;5.45E-01;7.89E-01;1.06E+00;5.97E-01
LOC101929028	-1.07881	0.699415	3	GGAATCTCACTCTGTCACCC;GCCGAGGCGGGCAGATCACG;TCCTGCCTCAGCCTCCCGAG	-1.53;-1.31;-0.4	17134;20055;39519	3.95E-01;8.27E-01;8.77E-01	37923;57387;60308	4.17E-01;3.70E-01;3.26E-01
C14orf119	-0.245964	0.576637	4	TGGCACTCAAAGATAGAAGG;GAGGTGATGTAAGACATCAG;CCAGCGTGAACGTTTCCTAG;GGGGAAGGGTTAGTATTGTG	-1.49;-0.31;0.38;0.43	17617;42100;61218;62254	3.77E-01;4.33E-01;3.83E-01;3.79E-01	15188;16224;35342;59825	3.90E-01;7.84E-01;6.85E-01;4.48E-01
ART1	-0.537747	0.574869	4	GGCTGCAACATGCTTCAGGG;TCTCCCGGATCTCAACCACA;AGAGGTCTCGTCGTGTGATG;GCCAGCGTACTGGTCATCAA	-3.26;0.0;0.33;0.77	3472;51177;60071;68619	8.06E-01;5.21E-01;3.78E-01;2.10E-01	8823;17371;26419;73977	4.99E-01;7.41E-01;9.80E-01;7.95E-02
ART3	-0.668107	0.743563	13	CGTGGACAAAATTGGCTTGC;AGATGGATAACACAGTGAGC;AATACCTGAAATGTACGGAC;GCCGAGGCGGGCAGATCACG;GTTGCTGAGAAAACCTTGTG;GTAATCAACCTGTTAATCCA;GGCTTCCCCATGTTCAAAAG;CCAGCAATTAGATACTGTGT;GAAGGGCATGGCTATAGCCT;CAGCGTACAGTTCTAGAGAG;AGAGGACGCTGTCTTTGCAT;GTTACTTGGGTACATTATGG;ACTCACATGATCTCAACACG	-2.63;-1.78;-1.44;-1.31;-1.19;-1.03;-0.88;-0.75;-0.4;-0.14;0.02;0.92;1.94	8005;14473;18209;20055;21836;24620;27720;30424;39471;46936;51704;70746;76334	4.40E-01;5.53E-01;5.94E-01;6.64E-01;7.90E-01;9.15E-01;1.04E+00;1.22E+00;1.02E+00;9.32E-01;9.95E-01;4.20E-01;8.13E-02	1108;6696;25738;30506;37971;47018;49722;52822;55606;57387;59233;62969;69437	8.06E-01;6.66E-01;7.33E-01;7.21E-01;7.80E-01;9.06E-01;7.90E-01;7.08E-01;6.40E-01;6.05E-01;6.46E-01;6.93E-01;6.16E-01
ART5	-0.12382	0.636491	4	GGGAGTTGAATCAGGCCGTG;ACCCACATAGGTATCGTCAA;GGCAGCCCCCCTGCTAAAGG;GCCTTCGCTTTGAACCCAAG	-0.62;-0.46;-0.25;0.84	33656;37776;43805;69638	5.03E-01;4.26E-01;5.02E-01;1.85E-01	7804;33637;39666;43786	5.33E-01;4.41E-01;5.81E-01;9.91E-01
ART4	-0.733773	0.486905	4	TGAGGTGCATTATAGGACGA;CATGACTACCACACACGCTG;AATGAACGTTCATACTGCTG;TATGGAGAAACTAACTCAAG	-2.73;-0.38;-0.01;0.18	7272;39983;50564;56292	5.54E-01;4.27E-01;4.13E-01;5.54E-01	21150;26878;37459;70162	3.77E-01;5.11E-01;6.31E-01;1.71E-01
CRTAM	0.156445	0.829356	4	GAAGTGAAAGTGATTGTGCT;TTATGGCAAAAATTCAACGG;GTACACGCCTTCATCTTGCA;GTAGCCAGGTTATCTGCGGA	-0.56;-0.27;-0.26;1.71	35227;43321;43471;75827	5.31E-01;4.38E-01;5.08E-01;3.66E-02	1615;33971;34121;42215	1.11E+00;4.39E-01;7.18E-01;1.05E+00
CADPS2	-0.666417	0.786822	17	CTTGCACTTATTGAACGGGG;GGTGAATGACAGTACCACGT;CTGGCCCTCATCGAACGTGG;TCGCCCAAGCTAGAGTGCAG;GCCGAGGCGGGCAGATCACG;AAAACATAGAAAAACGTGTG;CTGTGCCCGATGCGTGCCCA;GGGGAGAATGCACATGCAGT;AGCTCTACGTCTTCGTCGTG;ATAAAAGATGAAATATGCTA;CAAGGCAGGCAGATCACCTG;GGGGACGGAAAATATAGTCG;CGTCATTCGAAACATAGTGG;CTTTCTCCCCACCTCAACCA;AAGCTCCACTTTGAAGAGAG;ACAAGCAGCCCAGATCAGAA;GGTTGGAAATGAGATCACAT	-3.48;-1.81;-1.44;-1.41;-1.31;-1.15;-1.09;-0.89;-0.64;-0.63;-0.53;-0.36;-0.31;0.44;0.68;1.0;1.62	2253;14206;18205;18711;20055;22458;23567;27436;33210;33350;35879;40561;42003;62434;67195;71622;75545	5.11E-01;6.60E-01;6.83E-01;6.52E-01;7.04E-01;7.69E-01;9.04E-01;9.29E-01;8.69E-01;1.08E+00;1.20E+00;1.19E+00;1.44E+00;6.15E-01;5.48E-01;4.36E-01;1.83E-01	1897;5820;10247;15008;35439;36881;41563;44092;44232;50006;53878;54984;57387;58730;59237;63240;75188	5.53E-01;6.23E-01;6.66E-01;6.90E-01;1.09E+00;9.30E-01;9.44E-01;8.64E-01;7.45E-01;7.65E-01;7.41E-01;6.81E-01;6.63E-01;7.00E-01;8.70E-01;9.14E-01;2.18E-01
RLF	-0.448151	0.650636	5	TTTGTAATCTGGAATCTGAG;CAAGGCAGGCAGATCACCTG;AACATGGTATCCTCTGTACA;GGAATACCGATGTTGGAACA;TTAACATGCTCCATCACATG	-0.83;-0.53;-0.5;-0.3;-0.09	28790;35879;36912;42430;48481	5.38E-01;4.79E-01;5.28E-01;6.91E-01;1.02E+00	28961;35012;40530;41563;48652	5.42E-01;4.73E-01;4.87E-01;7.16E-01;1.01E+00
USP17L30	-1.26966	2.32905	47	TCTGAGCTGCCTGGATATCC;CGTGGACCAGCACAGCATAG;TGAATTTCTCATGTTCACTG;TTGTGGTGTTTGTCTCCAGA;TGATCTACCTGCTTGTGCCC;CCCTTACCTGGACATCGCCC;TTGCCAACTACATGCTGTCC;TGTTTGTCTCCAGAGGGCGC;GGTGTGTAAAGTTAACGTCT;AGTGAACATGAGAAATTCAT;CCACGTCATCCAGCCCTCAC;TCAAACGTGTCATCGTCACA;CCAGCAGCCAATGCCTGTGA;GATGCTAGAGGCGGTGACCT;TCCAAATATTTGGTGGATGA;CCTGTGAGGGCTGGATGACG;AAGAGATTCTCCGATGTCAC;GACCTGCTGCGGTGGGGGCT;AGCCCAGCCCCCACCGCAGC;…	-3.61;-3.26;-3.04;-3.01;-2.95;-2.84;-2.83;-2.7;-2.66;-2.64;-2.56;-2.48;-2.44;-2.4;-2.3;-2.12;-2.1;-2.05;-1.95;-1.59;-1.49;-1.39;-1.32;-1.32;-1.18;-1.1;-1.07;-1.05;-0.83;-0.82;-0.81;-0.39;-0.34;-0.34;-0.29;-0.24;0.09;0.14;0.25;0.26;0.29;0.43;0.43;0.46;0.75	1668;3445;4937;5150;5552;6423;6506;7468;7800;7955;8573;9066;9365;9609;10297;11656;11798;12176;12969;16468;17585;18936;19805;19875;22031;23442;23949;24229;28682;28970;29127;39699;41255;41342;42500;44021;53738;55110;57836;58176;58951;62192;62238;62854;68237;73041;75515	4.30E-01;5.59E-01;6.35E-01;7.42E-01;8.94E-01;9.98E-01;1.26E+00;1.35E+00;1.59E+00;1.91E+00;2.11E+00;2.35E+00;2.68E+00;3.05E+00;3.25E+00;3.18E+00;3.61E+00;3.96E+00;4.13E+00;3.26E+00;3.33E+00;3.33E+00;3.49E+00;3.93E+00;3.68E+00;3.68E+00;3.99E+00;4.38E+00;3.47E+00;3.83E+00;4.27E+00;2.09E+00;2.12E+00;2.43E+00;2.55E+00;2.61E+00;1.30E+00;1.34E+00;1.22E+00;1.40E+00;1.56E+00;1.34E+00;1.66E+00;1.95E+00;1.2…	1927;4401;9205;14588;15204;15250;18491;19266;19606;22332;23704;33421;34942;36100;36187;37743;48315;48472;48760;53213;53493;54000;55411;57567;57636;58506;59857;60974;64475;65266;65644;65781;67143;67843;68086;68373;68871;69492;69650;69965;70936;71023;71876;72286;72502;73999;75774	4.35E-01;6.00E-01;9.83E-01;1.55E+00;1.34E+00;1.11E+00;1.30E+00;1.18E+00;1.05E+00;1.15E+00;1.13E+00;2.25E+00;2.21E+00;2.10E+00;1.83E+00;1.81E+00;3.79E+00;3.39E+00;3.05E+00;3.90E+00;3.53E+00;3.25E+00;3.24E+00;3.47E+00;3.07E+00;2.91E+00;2.91E+00;2.84E+00;3.62E+00;3.45E+00;3.12E+00;2.73E+00;2.78E+00;2.59E+00;2.25E+00;1.95E+00;1.73E+00;1.55E+00;1.28E+00;1.07E+00;9.86E-01;8.00E-01;7.15E-01;6.37E-01;6.4…
CRTAP	-0.179911	0.61644	4	TGCCGCTCGAGTCGGCCTAC;GCAGGAACTTGTAGGGCTCG;CGAGCAGTGCGGGCATACAA;GAGTGTCTCGCAGCCTGCGA	-0.69;-0.53;-0.4;0.9	32049;35882;39394;70520	4.77E-01;4.31E-01;5.87E-01;1.63E-01	6922;38048;41560;45393	5.69E-01;4.26E-01;5.43E-01;9.28E-01
ADPGK	-0.148659	0.738022	7	GGAATCTCACTCTGTCACCC;TCGCCCAAGCTAGAGTGCAG;CCATCATGTGCAATCCAGAG;CAAGGCAGGCAGATCACCTG;ACTCTCTTACAGCACTATGT;GCTGGCCAGTATGACTAACA;AAGATGAATCGGTTGGCATG	-1.53;-1.41;-0.61;-0.53;0.16;0.92;1.95	17134;18711;33984;35879;55756;70710;76355	4.62E-01;5.12E-01;5.33E-01;6.03E-01;4.97E-01;4.53E-01;4.29E-02	1087;6732;21686;41563;43458;58730;60308	1.04E+00;9.97E-01;6.85E-01;5.39E-01;6.48E-01;4.92E-01;7.60E-01
CPEB4	-1.61206	0.97355	4	AGTGGAACGATATTCTCGAA;TGTGAGAGAGGCCCGATCTG;TTAACAAACCCCCCTCTCCG;AGTGCATGTCGAATGTCCTG	-2.92;-2.05;-1.0;-0.47	5786;12177;25217;37489	6.26E-01;9.77E-01;1.03E+00;1.26E+00	39953;52225;65265;71663	6.31E-01;5.39E-01;4.24E-01;1.35E-01
CPEB1	0.215268	1.00033	5	CAAGGCAGGCAGATCACCTG;CAAAGAGCCAAAAACACGGA;TCCACCAAGTCAGACCCAAG;TGCACTACACCTATAAACCG;ATGGGGTTCTTATAGTTCCG	-0.53;-0.21;0.34;0.7;0.77	35879;45006;60269;67561;68656	7.16E-01;6.05E-01;6.35E-01;4.32E-01;2.61E-01	8786;9881;17173;32436;41563	4.55E-01;9.66E-01;1.18E+00;1.05E+00;1.35E+00
CPEB3	-0.551165	0.507274	6	GCCGCCCAAGTTCCCTCGCG;GCCGAGGCGGGCAGATCACG;CAAGGCAGGCAGATCACCTG;CTGGTGGCCGTACGCCGCGG;ATATCAGCGAAACTCATTGG;ATGACAAGGCTTGATCACCA	-2.62;-1.31;-0.53;-0.41;0.51;1.05	8119;20055;35879;39242;64027;72132	4.42E-01;5.18E-01;5.12E-01;6.19E-01;3.96E-01;1.85E-01	5310;13415;38200;41563;57387;69323	5.40E-01;6.77E-01;5.05E-01;5.73E-01;4.59E-01;2.89E-01
SBSPON	-1.02068	0.583678	4	GCAAGCCTACAACCCGTGTG;CTGGAGTACTCCACCCCGCA;CTGCTGCTTCGACTACGACA;AACTACCTCTGCATTCAACA	-3.44;-1.2;0.17;0.38	2482;21758;55935;61128	9.35E-01;6.11E-01;3.78E-01;4.11E-01	16314;21507;55684;74956	3.83E-01;6.17E-01;3.79E-01;5.67E-02
SRBD1	-1.51193	1.02888	6	TCTGGCCTTGCAAAGCTACG;AAGACTGAGACATATCCTCA;GCCGAGGCGGGCAGATCACG;CGCAGCCACATACAGTTCGA;CAAGGCAGGCAGATCACCTG;TTGTGGACAAGGCTTCCGAG	-3.13;-2.89;-1.31;-1.28;-0.53;0.08	4273;6008;20055;20447;35879;53389	6.03E-01;1.18E+00;8.50E-01;1.40E+00;1.16E+00;9.69E-01	24053;41563;56995;57387;71439;73168	5.37E-01;7.01E-01;8.33E-01;5.18E-01;5.08E-01;1.48E-01
ABAT	-0.662783	0.573602	5	GAAAGAAGTCATCGGATGCG;GTGAATGGCTTTAGAGTGCG;CCTTAAAGACCATCTTCATG;CAAGGCAGGCAGATCACCTG;TGCAATTACGAAGAGAGCCG	-3.22;-0.81;-0.74;-0.53;1.99	3709;29226;30806;35879;76435	7.06E-01;4.64E-01;6.42E-01;9.08E-01;2.84E-02	1007;41563;46636;48216;73732	1.21E+00;5.43E-01;4.61E-01;5.47E-01;1.07E-01
POU5F1B	-1.54203	0.880281	4	GGTGGAGAGCAACTCCAATG;GCTGGGTTGATCCTCTGACC;CAAAGCAGAAACCCTCATGC;CCCGCCGTATGAGTTATGTG	-2.68;-2.51;-0.82;-0.16	7629;8859;29029;46379	5.40E-01;1.21E+00;8.80E-01;8.91E-01	31063;48413;68583;69813	4.63E-01;4.82E-01;4.98E-01;1.80E-01
LOC105379426	-3.2985	1.3795	1	CATTCAGCCTAGCACTGAAG	-3.3	3232	1.38	74213	0.0185
PHOX2A	-0.374339	0.490956	4	GGCGCCAAAGTCGCCGTAGG;AGGCGGTGCTATCGGGCGTG;CCCCGACATTTACACGCGTG;GCTTCCAATACAGCCCCCTG	-1.38;-0.68;0.16;0.41	19013;32157;55623;61741	3.75E-01;4.51E-01;3.79E-01;3.94E-01	15701;21819;45285;58429	3.86E-01;6.10E-01;4.79E-01;4.89E-01
PHOX2B	-0.740109	0.446829	4	CCTACGAGTCCTGTATGGCT;GCTTGCGAAACTTGGCGCGG;CTACCCCGACATCTACACTC;TACAAACTCTTCACGGACCA	-2.61;-0.76;-0.47;0.88	8137;30322;37561;70239	5.21E-01;4.68E-01;6.29E-01;1.70E-01	7203;39881;47120;69305	5.57E-01;4.27E-01;4.52E-01;1.93E-01
UPK2	-0.203451	0.864399	4	TTGTGGTGCCTCCGTGCCGT;AGAATTTGGTTCCTGGCACG;GTGTGGCATTGCCTCCTGTG;CAGGCTCTCCGTTAGCGCCG	-2.76;0.5;0.62;0.83	7006;63720;66072;69541	5.65E-01;8.94E-01;4.38E-01;1.87E-01	7901;11370;13722;70440	5.29E-01;1.03E+00;1.74E+00;1.65E-01
CFH	-0.648085	0.592841	7	GGAATCTCACTCTGTCACCC;AGACCAGTATAAAGTTGGAG;GCCGAGGCGGGCAGATCACG;ATAGTGGAGGAGAGTACCTG;GAAATGCATTGTTCAGACGA;ACATCAGGATCAATTACATG;GAGCCCTTATGAAATGTTTG	-1.53;-1.47;-1.31;-0.7;-0.27;0.05;0.68	17134;17914;20055;31788;43317;52622;67172	4.62E-01;5.21E-01;7.37E-01;6.91E-01;6.51E-01;6.56E-01;4.32E-01	10270;24821;34125;45654;57387;59528;60308	4.03E-01;5.05E-01;5.33E-01;5.34E-01;5.02E-01;4.76E-01;7.60E-01
CFI	-0.811029	0.659577	4	GATGCCAGTGGAATCACCTG;TGAGGTGGACTGCATTACAG;AGAAGACTTTATCGCAGGAG;TGTCTACATGTGCATTGCCG	-1.61;-0.72;-0.57;-0.35	16153;31307;35103;40985	3.83E-01;4.58E-01;6.91E-01;1.11E+00	36457;42339;46135;61289	5.54E-01;4.34E-01;4.66E-01;4.06E-01
CFD	-1.55037	0.862531	4	ACCGGGAACTCTCTGCGACG;CCCCGTGGTCGGATCCTGGG;ACGTCGTACAGGCGCTTGGA;ATGGCGTCGGTGCAGCTGAA	-3.57;-2.76;-0.01;0.13	1857;7039;50679;54792	1.05E+00;1.39E+00;4.12E-01;6.01E-01	22650;26763;70404;75585	3.83E-01;5.13E-01;5.64E-01;4.21E-02
CFB	-1.07974	0.713833	4	TGTCTGATCCATCTAGCACC;TATGACGGTTACACTCTCCG;CATGTACGACACCCCTCAAG;TCTGCAGGATTGCACAACAT	-1.83;-1.62;-0.79;-0.08	14022;16075;29604;48711	4.00E-01;7.90E-01;8.60E-01;8.05E-01	28731;47838;61367;63420	4.33E-01;4.76E-01;3.84E-01;3.47E-01
TPT1-AS1	-0.533336	0.334131	1	CAAGGCAGGCAGATCACCTG	-0.53	35879	0.334	41563	0.27
CFP	0.595339	1.32608	4	GCTCAGGTGCAGAACACTTG;TTTGCCTACCAGAAACGTAG;ACAGCGCCGGTACCGCAGCT;TGGGCCAGACCATGGAACAA	-0.14;0.13;1.14;1.24	46955;54939;72950;73724	8.30E-01;5.94E-01;7.12E-01;8.54E-02	3718;4492;22503;30487	7.81E-01;1.75E+00;1.16E+00;1.62E+00
AAAS	-2.74496	2.00541	4	GGCCCATCGACAGAGTGCCA;CCCAGGGTGAGACAGCACTT;TGACAGCGCCCTGATAGAGT;GCCAAGACAGAGGCACTAAG	-3.75;-3.38;-2.61;-1.24	1172;2787;8176;21007	1.24E+00;2.14E+00;2.38E+00;2.27E+00	56435;69255;74661;76270	1.24E+00;1.27E+00;8.90E-01;2.65E-02
SIDT1	-0.405291	0.542352	5	GCCGAGGCGGGCAGATCACG;TCTGCTGGCGAACCACAACA;TTTCGATCATGTCTACAGCG;CAGCGCGTAAAACACAGCAA;AGTTTGTACTGAGCACCCAG	-1.31;-1.27;-0.7;0.01;1.24	20055;20555;31808;51498;73719	4.08E-01;5.54E-01;6.19E-01;4.85E-01;1.07E-01	3723;25944;45634;56887;57387	7.05E-01;4.81E-01;4.62E-01;4.13E-01;6.51E-01
SIDT2	-0.749665	0.699478	4	TGTAGGTACTCGGCCCCGAG;GGAAGGACAAGCGTGTTCTG;CCATACTGTGACCCGCAACA;AAAATGTACCTTCTGCGAAG	-1.06;-0.93;-0.6;-0.41	24022;26690;34180;39325	3.90E-01;5.14E-01;7.16E-01;1.18E+00	38117;43262;50752;53420	5.89E-01;4.38E-01;4.11E-01;6.45E-01
SAGE1	0.868396	1.8913	4	TTCCTGTTTGTCTAACCACG;ACAGTTGACAAGTCATAACT;GTTGCCAAATAAGCAAGCCC;TCTGTCATATTAATACGCCG	0.49;0.84;0.85;1.3	63563;69647;69814;74078	1.72E+00;1.31E+00;5.40E-01;7.71E-02	3364;7628;7795;13879	8.18E-01;1.33E+00;2.44E+00;2.99E+00
UFD1	-1.26002	0.79052	4	GAAAAAGATACACGGCTTTG;TCGGACCGCATGACGCATTG;GATGGCAATCACATCCCCGG;AGAGAAGCAGCGGTACTGTG	-3.17;-0.88;-0.52;-0.46	4032;27705;36144;37756	7.51E-01;4.99E-01;6.64E-01;1.25E+00	39686;41298;49737;73414	6.24E-01;4.30E-01;4.21E-01;9.28E-02
AAGAB	-0.576166	0.492141	5	CAAGAATGGTGCATCAAACA;GCCGAGGCGGGCAGATCACG;AGCAGACATCAATCTATGTG;GCCATGAGGAGACACTATCA;CACTACATTGGACCACACAT	-1.58;-1.31;-0.58;0.24;0.35	16480;20055;34732;57824;60347	3.89E-01;5.64E-01;5.62E-01;4.05E-01;5.42E-01	17095;19618;42710;57387;60962	3.90E-01;5.73E-01;4.72E-01;4.08E-01;5.20E-01
C4orf19	-0.536947	0.496765	5	GCCGAGGCGGGCAGATCACG;GTGTGCTGCTGGCCTCAGAA;TTCATTGACATAGCCAGGAG;TGCAGAAAAATGACCCTCAG;CCAGATTACCTTCAGCATTG	-1.31;-1.15;-0.82;-0.2;0.79	20055;22575;28967;45332;68894	4.08E-01;5.20E-01;6.88E-01;6.14E-01;2.54E-01	8548;32110;48475;54867;57387	4.61E-01;4.62E-01;4.65E-01;4.35E-01;6.51E-01
SLC7A6OS	-0.918223	0.674197	4	CAGACACAGTCAATCGCTCA;AGGAGTCCGAGTACACGCCG;CCGAGGCGCGGAGATTACGG;GTCAGCGGCACAGAAGACGT	-1.99;-0.72;-0.65;-0.32	12639;31227;32979;41848	4.17E-01;4.59E-01;7.51E-01;1.07E+00	35594;44463;46215;64803	5.37E-01;4.45E-01;4.65E-01;3.10E-01
C4orf17	-0.602747	0.454782	4	AATGCATTTGGAACATTGTG;TTGGAATGTTATTCAAGCCT;ATGAGTTAACAGGTTTATCT;CTGGCGACATTCCTCTTACA	-1.8;-1.26;0.27;0.38	14266;20727;58474;61194	3.98E-01;6.37E-01;3.75E-01;4.09E-01	16248;18968;56715;63176	3.83E-01;6.88E-01;3.76E-01;3.54E-01
RFPL4AL1	-1.07055	0.76067	6	TCTGGCTCAAATCCCCACTT;AGGAATCTGTCAACCGACAG;GTGGGGATTTGAGCCAGAAT;GGAGTGAATTGAGGCACTGG;GAAGCCGTGCAACTGAAATG;AGTGGATATGACCTTCGATG	-3.93;-3.22;-0.36;0.06;0.15;0.88	737;3684;40787;52875;55252;70214	1.26E+00;1.55E+00;5.09E-01;4.84E-01;4.98E-01;2.55E-01	7228;22190;24567;36655;73760;76705	4.65E-01;4.96E-01;6.92E-01;6.80E-01;6.51E-01;2.49E-02
ETV3L	-0.491577	0.612468	4	GCCCGTGGGTGTGCAGAGTG;TTTGTAGGCCCAATCAGGGA;AGACCTCTGGGGATAAGAAG;GGCGCCCGCACTTCCCACAA	-3.37;0.01;0.25;1.14	2838;51460;58056;72941	8.83E-01;5.25E-01;3.75E-01;1.04E-01	4501;19386;25982;74604	7.12E-01;6.75E-01;9.98E-01;6.48E-02
TEN1-CDK3	-1.39895	1.17498	9	CTCCCTGTACATCGTCCTCG;TCAGTCCAGAGTAACACTGA;GGAATCTCACTCTGTCACCC;GTGGAAGGGCTCCACCAACT;GACCTATTACCTCCCCTGGG;TGGACGTGGTGCACAACGAG;TCATGGGTGTAGGTGCGCAG;GCTGCCCAAGAGAATCTCGG;GGTGGATGACCCGATGTGAG	-3.79;-3.27;-1.53;-1.24;-1.05;-0.89;-0.58;-0.35;0.12	1081;3396;17134;20962;24254;27540;34610;40909;54552	9.50E-01;1.30E+00;6.93E-01;8.55E-01;1.07E+00;1.34E+00;1.41E+00;1.59E+00;1.37E+00	22890;36533;42832;49902;53188;56480;60308;74053;76361	7.92E-01;1.04E+00;9.46E-01;9.08E-01;7.32E-01;6.01E-01;5.14E-01;5.60E-01;5.49E-02
LOC105369743	-0.533336	0.334131	1	CAAGGCAGGCAGATCACCTG	-0.53	35879	0.334	41563	0.27
MKRN2OS	-0.993102	0.589141	5	TGGAAGACTTCTCCACCTCG;TCGCCCAAGCTAGAGTGCAG;GTGTATAATTACAGTGCACA;TCCTCCTCAGACCAACTCAG;TGTAGATGTATTTCTCACAG	-3.36;-1.41;-0.58;-0.06;0.43	2899;18711;34793;49311;62309	7.94E-01;5.94E-01;5.61E-01;5.25E-01;4.72E-01	15133;28131;42649;58730;74543	3.88E-01;4.68E-01;4.72E-01;3.98E-01;8.28E-02
MDC1-AS1	-0.622255	0.478925	4	AATGATACAAAAGTCAAGAG;CCCACATATCAGGCTACTAG;GTGGCATCTTGCAATTCAGG;AGAGGACATGCCCCAACGTG	-2.38;-0.3;0.09;0.1	9786;42271;53671;54149	4.72E-01;4.33E-01;3.89E-01;6.22E-01	23293;23771;35171;67655	3.86E-01;5.66E-01;6.89E-01;2.35E-01
GPR17	-0.183126	0.583084	4	GCTGCAGGCAGACCACCGTG;CAGATGCATCAGGAACACGT;AAGTTGGTGATCAGACCTGG;CACAATGGCCAGGAAACGGT	-1.03;-0.23;-0.11;0.63	24752;44239;47914;66309	3.95E-01;4.44E-01;4.42E-01;2.70E-01	11133;29528;33203;52690	4.42E-01;4.76E-01;7.45E-01;6.69E-01
MRPS31P4	-1.30793	0.586748	1	GCCGAGGCGGGCAGATCACG	-1.31	20055	0.587	57387	0.13
ZNF117	0.0626552	0.834283	5	AAAGAAACCCTACAAATGTG;GTTGAGTGTAAACAGCACAA;ACATTCATAACGTTTCTCTC;ACATAATATAATTCATACTG;CTTATGTCTAATAAGGTGTG	-0.57;-0.18;-0.08;0.19;0.94	35033;45927;48791;56510;70966	6.92E-01;6.25E-01;4.66E-01;4.17E-01;1.90E-01	6476;20932;28651;31515;42409	5.30E-01;5.47E-01;6.97E-01;1.09E+00;1.31E+00
ZNF114	-0.934089	0.72195	6	TACGTGATGAAATTGATACG;GCCGAGGCGGGCAGATCACG;CTTATGGAATCTCCCTGTGA;ACGAAGACGATGGAGTCTTG;CAAGGCAGGCAGATCACCTG;CCAAAACAGAGGAACCACAC	-2.21;-1.31;-1.27;-0.86;-0.53;0.57	10982;20055;20641;28146;35879;65194	4.02E-01;5.18E-01;8.26E-01;9.74E-01;1.16E+00;4.49E-01	12248;41563;49296;56801;57387;66466	3.97E-01;7.01E-01;6.06E-01;5.11E-01;4.59E-01;3.98E-01
ZNF112	-0.436205	0.499061	4	TCAGGAGTCAATTCAAACAG;AAGTTCATAAGTGTTAAGAG;AATGTGATAAGGGATTCAGT;CATTGGAGAGAAACCACGTA	-2.2;-0.48;-0.2;1.14	11057;37287;45154;72886	4.44E-01;4.27E-01;4.81E-01;1.05E-01	4556;32288;40155;66385	7.07E-01;4.50E-01;5.71E-01;2.68E-01
SEZ6L	-0.480137	0.52221	5	GAGTGTGAACCTGTCCGATG;TCATCGAATGCATCAATGTG;TCCTGCCTCAGCCTCCCGAG;GACCGTGGTGGTGATAATGG;GCCAGGATGACGGTTCACAG	-1.57;-0.61;-0.4;0.02;0.16	16622;33910;39519;51903;55571	3.89E-01;4.68E-01;4.97E-01;4.78E-01;7.21E-01	21871;25539;37923;43532;60820	4.27E-01;4.85E-01;5.15E-01;6.60E-01;5.25E-01
PRKAR2A	-0.342954	0.731714	7	GTTGGTCAATATGACAACCG;GGAATCTCACTCTGTCACCC;GCCGAGGCGGGCAGATCACG;TTTGACTATCCTTTCAAACA;CAAGGCAGGCAGATCACCTG;ACTCGTCTATTAAATCTGCT;GCGAATTCGACGAGGTCAGG	-1.77;-1.53;-1.31;-0.82;-0.53;0.35;3.21	14553;17134;20055;28940;35879;60495;77279	4.23E-01;5.31E-01;7.37E-01;7.75E-01;8.89E-01;4.58E-01;6.37E-03	163;16947;41563;48502;57387;60308;62888	1.84E+00;5.34E-01;6.03E-01;5.51E-01;5.02E-01;4.62E-01;6.33E-01
PRKAR2B	-0.647191	0.581587	5	GCCGAGGCGGGCAGATCACG;TCAAAGAAATAGGTTGCAAG;TGAAAAATTGGTCAAAGATG;TTGGTAACTATGATAATCGT;GCGGACGCAGGGGCGTTCAA	-1.31;-1.13;-0.88;-0.55;0.63	20055;22839;27678;35571;66236	4.08E-01;5.16E-01;7.25E-01;9.20E-01;3.39E-01	11206;41871;49764;54603;57387	4.12E-01;5.48E-01;4.70E-01;4.38E-01;6.51E-01
MAGT1	0.459139	1.24695	5	CAAGGCAGGCAGATCACCTG;ATACATATGAGTTACAGGTG;AAGGGGACCAGCATAATTTG;GAGCGAACATGGCAGCGCGT;GTGGGGCTTTCACAAGGCGA	-0.53;0.15;0.24;1.04;1.39	35879;55348;57768;72099;74607	7.16E-01;9.26E-01;5.72E-01;5.86E-01;8.10E-02	2835;5343;19674;22094;41563	8.02E-01;1.42E+00;1.04E+00;1.63E+00;1.35E+00
S1PR4	-0.548704	0.462783	4	TGTAGTGCAGAACAATGAGC;AGCCGCGTCTACGGCTTCAT;CGGCCATCACCAGCCACATG;TGAAGAGCAGGCCCTCCCGT	-2.01;-0.5;0.16;0.16	12472;36703;55550;55637	4.20E-01;4.28E-01;3.79E-01;5.74E-01	21805;21892;40739;64970	3.79E-01;6.08E-01;5.59E-01;3.05E-01
ITGA2B	-0.851267	0.726566	5	GGCTGTCACTGACGTCAACG;TCCACAAGGACAGCCATGGG;ATGTCTATAGACCTGATCGT;CAAGGCAGGCAGATCACCTG;GGCCGTGGGCGAGTTCGACG	-1.46;-1.45;-0.64;-0.53;-0.17	18005;18158;33032;35879;46030	3.94E-01;6.08E-01;5.93E-01;9.08E-01;1.13E+00	31412;41563;44410;59284;59437	5.97E-01;5.43E-01;4.65E-01;3.95E-01;5.75E-01
LOC105371131	-0.591045	0.776826	17	CCATACCTTCCTGTCTACGG;TTTGGCCCTACAGGTCAGAA;AAAGTTTCAGCTGTGAGGTA;GGAGTGAGCACACACTCGGG;TGTCAGAGGCAGAGGAAAAT;GAGCCATACCTTCCTGTCTA;CCAAAGGTAAACTATCCAGA;AGAGTTGCGGCGGCGAGCAG;TCCTGCCTCAGCCTCCCGAG;GCAATAATGACATGTAACCA;AGATTATCATCCGCTCAGGG;TGTCTTGAGATCATCCGCTG;ATAAAGTTGTCATTACCCTC;AAGTTAGTATACTCACCCAA;TCCAACCGCCGTAGACAGGA;CATGCCCATGCGAGTACCTG;TCATACCCAAGCAGAGTGCC	-3.12;-2.4;-2.22;-2.0;-1.8;-1.5;-1.14;-0.86;-0.4;-0.12;0.26;0.3;0.65;0.74;0.76;0.84;1.95	4417;9638;10897;12537;14301;17448;22647;28264;39519;47603;58105;59219;66665;68122;68517;69726;76358	4.21E-01;5.42E-01;6.45E-01;7.84E-01;9.40E-01;1.01E+00;9.51E-01;8.91E-01;7.24E-01;7.24E-01;8.95E-01;7.48E-01;8.95E-01;7.06E-01;5.41E-01;5.00E-01;1.04E-01	1084;7716;8925;9320;10777;18223;19337;29839;37923;49178;54795;59994;63137;64906;66536;67801;73034	7.21E-01;5.53E-01;7.27E-01;1.03E+00;1.27E+00;9.59E-01;1.18E+00;8.30E-01;7.42E-01;7.47E-01;7.64E-01;7.75E-01;7.10E-01;6.14E-01;5.58E-01;5.98E-01;4.33E-01
PHACTR4	-0.870146	0.832025	6	GCCGAGGCGGGCAGATCACG;ACTGCATATTCGAATCCAGC;ATGGCCATACCACCCCCATA;GGTAGCAGTAGTGTTAGTGC;CAAGGCAGGCAGATCACCTG;ACCATCCTTAGATCTACACC	-1.31;-1.3;-1.19;-0.89;-0.53;0.01	20055;20101;21903;27375;35879;51447	4.59E-01;5.17E-01;7.78E-01;1.01E+00;1.16E+00;1.07E+00	25995;41563;50067;55539;57341;57387	5.84E-01;7.01E-01;6.22E-01;4.98E-01;4.60E-01;7.81E-01
PHACTR1	-0.864995	0.753703	7	ACTCTCTATATCCAATGAAG;CCGGTCTATATCATCCTCCG;GGAATCTCACTCTGTCACCC;AGACGAGCTCAACAAAACGC;CAAGGCAGGCAGATCACCTG;TGGAGCACCTCATATGAGCA;GAGAGTTACTTGCACCCAAG	-4.29;-1.57;-1.53;-0.91;-0.53;0.52;2.26	217;16588;17134;27146;35879;64094;76775	1.71E+00;5.40E-01;8.56E-01;8.39E-01;8.89E-01;4.11E-01;2.63E-02	667;13348;41563;50296;60308;60854;77225	1.24E+00;6.16E-01;6.03E-01;5.72E-01;5.31E-01;4.52E-01;8.49E-03
NLGN3	0.648776	1.39359	4	GACCCGCCGTAAAACACTGG;TCTTCGGCAAAAGAGTGCCA;AGTGATGTGACAACGTGAGG;GGACTTAGCGGATAATGACG	-0.54;0.37;1.37;1.38	35842;61001;74506;74556	5.42E-01;7.75E-01;8.70E-01;6.60E-02	2886;2936;16441;41600	8.76E-01;2.10E+00;1.52E+00;1.08E+00
PHACTR3	-1.27328	0.887855	5	CAGATCGGGGTCCTCCATCG;AGATATTCAGGACGCGCCGG;TCCTGCCTCAGCCTCCCGAG;GCTCTCCCAAGCCTTAGCTG;AGTACCTGCATCGTCCAAGT	-3.99;-1.4;-0.4;-0.39;-0.19	590;18833;39519;39848;45603	1.43E+00;5.91E-01;4.97E-01;7.69E-01;1.15E+00	31839;37594;37923;58609;76852	6.07E-01;4.93E-01;5.15E-01;3.99E-01;1.66E-02
NUP107	-1.96448	1.36921	5	ATAGTGAGTCGAGCAACACC;CGGCAGCTGACTTCTTACGT;CATGACCCTAATGTTAATGG;GCCGAGGCGGGCAGATCACG;TAATCTGGATGACAGTAACT	-2.97;-2.65;-2.52;-1.31;-0.38	5431;7835;8832;20055;40205	5.81E-01;1.13E+00;1.93E+00;1.78E+00;1.42E+00	37237;57387;68606;69610;72010	7.58E-01;1.02E+00;1.04E+00;4.81E-01;1.58E-01
KRTAP2-3	-0.814504	0.86555	15	AGCCTTCCTGCAGGGAGCAG;AGGGGTCGCAGCACACCGGG;CACCACAGCCGTGCACGACG;CCACAGCCGTGCACGACGAG;CTTGTCCTCCCTGAGCTACG;AGGGGCAGCAGGTGATGGGG;GTAGCTCAGGGAGGACAAGG;AGCGGGGCACGCAGGTCACG;GCCTCCCCCGTAGCTCAGGG;CAGATGGGGCGCGTGCAGCG;GGGGCACGCAGGTCACGGGG;GCAGGTCACGGGGCGGCACA;GGTCGCAGCACACCGGGCGG;ACCACAGCCGTGCACGACGA;GAGCAGGGGTCGCAGCACAC	-4.23;-3.98;-2.06;-1.35;-1.28;-1.14;-1.0;-0.88;-0.54;0.21;0.44;0.58;0.91;0.92;1.18	265;618;12127;19499;20419;22743;25291;27695;35615;56938;62582;65306;70540;70671;73280	1.31E+00;2.22E+00;6.45E-01;6.46E-01;7.46E-01;8.52E-01;9.67E-01;1.11E+00;9.42E-01;7.44E-01;7.50E-01;6.45E-01;6.06E-01;4.38E-01;3.60E-01	4162;6771;6902;12136;14860;20504;41827;49747;52151;54699;57023;57943;65315;76824;77177	4.29E-01;6.12E-01;9.78E-01;8.99E-01;1.03E+00;9.66E-01;7.63E-01;8.55E-01;7.62E-01;6.93E-01;6.43E-01;6.51E-01;5.51E-01;9.71E-01;2.22E-02
KRTAP2-2	-0.720572	0.815943	14	AGCCTTCCTGCAGGGAGCAG;AGGGGTCGCAGCACACCGGG;CACCACAGCCGTGCACGACG;CCACAGCCGTGCACGACGAG;AGGGGCAGCAGGTGATGGGG;AGCGGGGCACGCAGGTCACG;GCCTCCCCCGTAGCTCAGGG;CTTCTCCTCCCTGAGCTACG;CAGATGGGGCGCGTGCAGCG;GGGGCACGCAGGTCACGGGG;GCAGGTCACGGGGCGGCACA;GGTCGCAGCACACCGGGCGG;ACCACAGCCGTGCACGACGA;GAGCAGGGGTCGCAGCACAC	-4.23;-3.98;-2.06;-1.35;-1.14;-0.88;-0.54;-0.15;0.21;0.44;0.58;0.91;0.92;1.18	265;618;12127;19499;22743;27695;35615;46664;56938;62582;65306;70540;70671;73280	1.34E+00;2.28E+00;6.68E-01;6.55E-01;7.18E-01;7.40E-01;6.98E-01;6.87E-01;7.86E-01;7.93E-01;6.68E-01;6.27E-01;4.29E-01;3.36E-01	4162;6771;6902;12136;14860;20504;30778;41827;49747;54699;57943;65315;76824;77177	4.35E-01;6.34E-01;1.03E+00;9.59E-01;1.12E+00;1.05E+00;8.10E-01;6.87E-01;6.61E-01;6.38E-01;6.21E-01;5.39E-01;9.98E-01;2.08E-02
KRTAP2-1	-0.720572	0.815943	14	AGCCTTCCTGCAGGGAGCAG;AGGGGTCGCAGCACACCGGG;CACCACAGCCGTGCACGACG;CCACAGCCGTGCACGACGAG;AGGGGCAGCAGGTGATGGGG;AGCGGGGCACGCAGGTCACG;GCCTCCCCCGTAGCTCAGGG;CTTCTCCTCCCTGAGCTACG;CAGATGGGGCGCGTGCAGCG;GGGGCACGCAGGTCACGGGG;GCAGGTCACGGGGCGGCACA;GGTCGCAGCACACCGGGCGG;ACCACAGCCGTGCACGACGA;GAGCAGGGGTCGCAGCACAC	-4.23;-3.98;-2.06;-1.35;-1.14;-0.88;-0.54;-0.15;0.21;0.44;0.58;0.91;0.92;1.18	265;618;12127;19499;22743;27695;35615;46664;56938;62582;65306;70540;70671;73280	1.34E+00;2.28E+00;6.68E-01;6.55E-01;7.18E-01;7.40E-01;6.98E-01;6.87E-01;7.86E-01;7.93E-01;6.68E-01;6.27E-01;4.29E-01;3.36E-01	4162;6771;6902;12136;14860;20504;30778;41827;49747;54699;57943;65315;76824;77177	4.35E-01;6.34E-01;1.03E+00;9.59E-01;1.12E+00;1.05E+00;8.10E-01;6.87E-01;6.61E-01;6.38E-01;6.21E-01;5.39E-01;9.98E-01;2.08E-02
KRTAP2-4	-0.814504	0.86555	15	AGCCTTCCTGCAGGGAGCAG;AGGGGTCGCAGCACACCGGG;CACCACAGCCGTGCACGACG;CCACAGCCGTGCACGACGAG;CTTGTCCTCCCTGAGCTACG;AGGGGCAGCAGGTGATGGGG;GTAGCTCAGGGAGGACAAGG;AGCGGGGCACGCAGGTCACG;GCCTCCCCCGTAGCTCAGGG;CAGATGGGGCGCGTGCAGCG;GGGGCACGCAGGTCACGGGG;GCAGGTCACGGGGCGGCACA;GGTCGCAGCACACCGGGCGG;ACCACAGCCGTGCACGACGA;GAGCAGGGGTCGCAGCACAC	-4.23;-3.98;-2.06;-1.35;-1.28;-1.14;-1.0;-0.88;-0.54;0.21;0.44;0.58;0.91;0.92;1.18	265;618;12127;19499;20419;22743;25291;27695;35615;56938;62582;65306;70540;70671;73280	1.31E+00;2.22E+00;6.45E-01;6.46E-01;7.46E-01;8.52E-01;9.67E-01;1.11E+00;9.42E-01;7.44E-01;7.50E-01;6.45E-01;6.06E-01;4.38E-01;3.60E-01	4162;6771;6902;12136;14860;20504;41827;49747;52151;54699;57023;57943;65315;76824;77177	4.29E-01;6.12E-01;9.78E-01;8.99E-01;1.03E+00;9.66E-01;7.63E-01;8.55E-01;7.62E-01;6.93E-01;6.43E-01;6.51E-01;5.51E-01;9.71E-01;2.22E-02
LOC390956	-2.0131	1.25896	3	CCAGGGTTTATGTGTCAGGG;GCTCTGAGCACTGGAGAGAA;CCACCCTGACACATAAACCC	-2.44;-1.95;-1.64	9312;12934;15860	5.54E-01;1.16E+00;2.07E+00	61581;64511;68121	1.00E+00;4.59E-01;1.67E-01
LOC101928034	-0.0477967	0.701019	4	GAGTGTTCTGGACACCAACA;TGCACCTTCCAGGAATACGC;CAAATACAAGCTCTGCCAGG;TTCCTGGAAGGTGCACACGA	-0.54;-0.15;-0.04;0.55	35640;46626;49668;64691	5.38E-01;4.63E-01;4.22E-01;3.13E-01	12751;27774;30816;41802	4.16E-01;4.98E-01;8.19E-01;1.07E+00
LOC101928035	-0.533336	0.334131	1	CAAGGCAGGCAGATCACCTG	-0.53	35879	0.334	41563	0.27
VMP1	0.006044	1.04858	6	AATTCCTAAGCCTATCCAGT;GCCGAGGCGGGCAGATCACG;CAAGGCAGGCAGATCACCTG;ATGGCATCGTCAAAGCATTG;GATTGCTGTACCGATACCCT;AATGTAACTGAGGCTATATG	-2.2;-1.31;-0.53;0.92;1.54;1.62	10994;20055;35879;70696;75258;75555	4.02E-01;5.18E-01;5.12E-01;1.10E+00;8.34E-01;6.42E-02	1887;2184;6746;41563;57387;66435	8.89E-01;1.97E+00;2.00E+00;5.73E-01;4.59E-01;3.99E-01
PPIAP8	-1.8189	1.51651	5	CCAGGGTTTATGTGTCAGGG;GCTCTGAGCACTGGAGAGAA;AGGTTCTGGCATCTTGTCCA;CCACCCTGACACATAAACCC;GCCAAGACTGAGTGGTTGGA	-2.44;-1.95;-1.85;-1.64;-1.21	9312;12934;13833;15860;21567	4.43E-01;7.93E-01;1.42E+00;2.16E+00;2.78E+00	55876;61581;63609;64511;68121	1.66E+00;1.27E+00;7.53E-01;3.96E-01;2.78E-01
PPIAP9	-1.87142	1.76529	7	GGTGACTTCACACGCCATAA;CCAGGGTTTATGTGTCAGGG;GCTCTGAGCACTGGAGAGAA;CCACCCTGACACATAAACCC;TTCACACGCCATAATGGCAC;GCCAAGACTGAGTGGTTGGA;AACTTTCGTGCTCTGAGCAC	-3.32;-2.44;-1.95;-1.64;-1.46;-1.21;-1.07	3128;9312;12934;15860;17949;21567;23845	6.56E-01;7.96E-01;1.11E+00;1.51E+00;2.08E+00;2.63E+00;3.58E+00	53597;55876;59490;61581;64511;68121;74314	2.38E+00;1.74E+00;1.34E+00;9.20E-01;6.29E-01;4.09E-01;1.25E-01
PPIAP4	-1.76427	1.07314	3	CCAGGGTTTATGTGTCAGGG;CCACCCTGACACATAAACCC;GCCAAGACTGAGTGGTTGGA	-2.44;-1.64;-1.21	9312;15860;21567	5.54E-01;1.00E+00;1.67E+00	55876;61581;68121	7.75E-01;4.11E-01;1.67E-01
PPIAP6	-1.54783	1.16455	5	CCAGGGTTTATGTGTCAGGG;GAATTGTCCACAGTCAGCAA;CCACCCTGACACATAAACCC;GCCAAGACTGAGTGGTTGGA;AATGCTGGACCCAACACAAA	-2.44;-1.91;-1.64;-1.21;-0.54	9312;13305;15860;21567;35807	4.43E-01;7.76E-01;1.27E+00;1.66E+00;1.68E+00	41635;55876;61581;64125;68121	9.11E-01;9.49E-01;6.76E-01;3.93E-01;2.78E-01
PPIAP7	-1.20781	0.555181	1	GCCAAGACTGAGTGGTTGGA	-1.21	21567	0.555	55876	0.142
PPIAP1	-1.63284	1.07596	4	CCAGGGTTTATGTGTCAGGG;GAATTGTCCACAGTCAGCAA;CCACCCTGACACATAAACCC;AATGCTGGACCCAACACAAA	-2.44;-1.91;-1.64;-0.54	9312;13305;15860;35807	4.85E-01;9.16E-01;1.56E+00;1.34E+00	41635;61581;64125;68121	6.73E-01;7.98E-01;4.08E-01;2.23E-01
PPIAP2	-0.872074	0.53296	2	GCCAAGACTGAGTGGTTGGA;AATGCTGGACCCAACACAAA	-1.21;-0.54	21567;35807	3.96E-01;6.70E-01	41635;55876	3.03E-01;2.83E-01
PPIAP3	-0.872074	0.53296	2	GCCAAGACTGAGTGGTTGGA;AATGCTGGACCCAACACAAA	-1.21;-0.54	21567;35807	3.96E-01;6.70E-01	41635;55876	3.03E-01;2.83E-01
NR1D1	-0.455507	0.490296	4	TTCTGGGGCTGCATACACGT;GCTGGGTGGAATGCTCCCAA;GAGTCTACAAGTGGCCATGG;GTAGGTGAAGATCTCTCGAT	-2.04;-0.39;0.22;0.38	12285;39934;57114;61202	4.23E-01;4.27E-01;3.76E-01;4.09E-01	16240;20328;37508;65157	3.83E-01;6.48E-01;6.30E-01;3.00E-01
NR1D2	0.0461212	0.737818	4	CGCAAGCATGAACTCCATAG;TACTCTTTGAGTATAAGCAT;AGTTACCTGTGCAACACTGG;TTCCTAAGCGTGAAAAACAG	-0.69;-0.04;0.01;0.9	31974;49844;51600;70432	4.76E-01;5.01E-01;4.04E-01;1.65E-01	7010;25842;27598;45468	5.65E-01;5.28E-01;9.34E-01;9.25E-01
PLPBP	-0.0847966	0.641298	4	TGATCGAGGCCTATGGACAT;ATGGTCCAGATTAACACCAG;TTCAGAGACCATAGCCATCG;AGTCGGGTGCGCATTGCGGG	-0.98;-0.14;-0.11;0.9	25522;47048;47658;70418	4.01E-01;4.67E-01;4.45E-01;1.65E-01	7024;29784;30394;51920	5.64E-01;4.74E-01;8.33E-01;6.95E-01
OGFR	-0.0680733	0.762504	4	CAGAAACTGGCGAGCCACGA;TGTGGGCCAGAGCATAGCAA;CCCCAGACGAACTTGCAGCG;AGGAGTGATTGTCCTCAAGG	-2.51;-0.33;0.06;2.51	8863;41491;52852;76969	4.98E-01;4.30E-01;3.94E-01;1.06E-02	473;24590;35951;68578	1.62E+00;5.50E-01;6.69E-01;2.11E-01
RPS26P47	-0.896041	0.626286	3	TGCAGCGAATAGGCTGCACG;CTGTGCCCGATGCGTGCCCA;CGTCATTCGAAACATAGTGG	-1.29;-1.09;-0.31	20369;23567;42003	3.68E-01;7.14E-01;7.97E-01	35439;53878;57073	3.94E-01;3.55E-01;3.98E-01
LOC389842	-3.76872	1.83705	1	ACTCGTCGGCGAAGTCAGCG	-3.77	1127	1.84	76315	0.00636
PTCH2	-1.01671	0.651393	5	GATGGATGTGAGTACGACAC;TTGTCTCAATAATGGCCATG;GGAATCTCACTCTGTCACCC;CTGGCCTAGAAGGTCCCGTG;CCGAGGCACCACATCCGTCA	-2.39;-2.26;-1.53;-0.21;1.31	9659;10608;17134;44862;74165	4.36E-01;9.19E-01;1.18E+00;6.25E-01;9.39E-02	3277;32581;60308;66834;67783	7.50E-01;4.63E-01;6.36E-01;4.20E-01;2.89E-01
PTCH1	-1.0731	0.69697	4	AAGGTGTAATAATCAAACAA;AGCGGGAATTGGGATTAACG;TGATGTCGATGGGCTTATCG;AAATGTACGAGCACTTCAAG	-2.14;-1.34;-0.56;-0.25	11505;19599;35187;43681	4.36E-01;6.69E-01;6.89E-01;9.95E-01	33761;42255;57843;65937	5.05E-01;4.33E-01;3.75E-01;2.79E-01
TIMM44	-1.46263	0.788947	4	AGTGTTTGAGCCAAACGAGT;TATAAAAAAATTCCGTGACG;ATCTGATAGGTCGACCCATG;TCTCGGCCGGAAAATCAAGG	-3.06;-2.29;-0.5;0.0	4849;10395;36702;50895	6.85E-01;1.09E+00;6.50E-01;7.29E-01	26306;40740;67063;72585	4.08E-01;4.28E-01;4.58E-01;1.12E-01
RAD9B	-0.678221	0.563871	5	TGATAATGCTGAAAAAACAC;GCCGAGGCGGGCAGATCACG;TCTCAAGGACCTACTTCCCA;ATACGCTAATGATTCAACCA;AGTTCTAATGAGGAATCAAT	-1.4;-1.31;-1.29;0.05;0.55	18762;20055;20370;52778;64781	3.99E-01;5.64E-01;1.01E+00;4.64E-01;3.88E-01	12661;24664;57072;57387;58680	3.98E-01;4.93E-01;5.58E-01;4.08E-01;6.02E-01
RAD9A	-2.98752	2.33718	4	CCACTCCCTGTCCCGCATCG;GCGCTGTAAGATCCTGATGA;CCTGCGCAGCTACCACGAGG;GTATTGCTGGAAGAAGAGCG	-3.34;-2.99;-2.9;-2.73	2991;5314;5997;7273	8.62E-01;1.61E+00;2.77E+00;4.11E+00	70166;71452;72122;74451	2.52E+00;1.52E+00;6.54E-01;6.84E-02
ERGIC2	-0.125781	0.627374	4	GCTCTCAGGAACCTTCGGAA;GCCAAATGTGCATGACCACG;TCTCAGTATATCAAGATACA;TTTCTATGCAGATGTTGGAG	-0.71;-0.33;0.0;0.54	31372;41626;51000;64494	4.67E-01;4.31E-01;4.09E-01;3.18E-01	12948;26196;35816;46070	4.13E-01;5.22E-01;6.72E-01;9.02E-01
ERGIC3	-1.90059	1.20432	4	CGGGAGGCATATCGCCGTAG;CCTGCAGTGACCATTGTCAG;AGATCACTCACCGTGCACAT;CTCTACGTGGACAAGTCGCG	-3.36;-1.97;-1.69;-0.58	2877;12800;15353;34684	8.77E-01;9.42E-01;1.60E+00;1.40E+00	42757;62089;64642;74563	7.02E-01;8.19E-01;4.15E-01;6.58E-02
ERGIC1	-0.230793	0.741245	7	TCGCCCAAGCTAGAGTGCAG;CAAGGCAGGCAGATCACCTG;GGAGCTTTCAATGCTCTCGG;TGGACACGTGGAAGTTGCCG;TCCTGCCTCAGCCTCCCGAG;TCTTCATGGAGTTGTCGATG;TACGCAGCCAACGTACACCG	-1.41;-0.53;-0.52;-0.51;-0.4;0.0;1.75	18711;35879;36276;36409;39519;51396;75934	4.92E-01;6.97E-01;5.42E-01;5.95E-01;7.59E-01;6.96E-01;5.97E-02	1508;26046;37923;41033;41166;41563;58730	9.17E-01;5.14E-01;5.55E-01;5.43E-01;7.09E-01;1.11E+00;8.41E-01
B3GAT3	-1.04488	0.578295	4	CCAGAGCCCATACCTGGCAT;CGATGACAACACCTACAGCC;TTCCGCTGCTCGACACCACG;CGAGCTGTACCAGCGCGTAG	-3.19;-1.79;-0.42;1.23	3881;14371;38931;73626	7.65E-01;8.63E-01;5.97E-01;8.78E-02	3816;38511;63071;73560	7.71E-01;4.26E-01;3.97E-01;8.93E-02
B3GAT2	0.259815	0.920019	4	CCGCGTAGGGAGAGAAGTAG;CGCCACCTGGCGGAACGTGT;CCGGGCCGCTTGTAGCGCCG;GTCAGCGAAGAAGAGCACGC	-0.73;-0.45;0.87;1.35	31044;38272;70043;74347	4.62E-01;4.26E-01;5.49E-01;7.08E-02	3095;7399;39170;46398	8.49E-01;1.35E+00;5.92E-01;8.90E-01
B3GAT1	-0.130326	0.633823	4	TGTAGGTGGGCGTCACCACG;GTCTGACCGCGACATCGTGG;CCGCGCAGCTTGTAGTTGCG;CACCCTCGCACCCCTGCTCG	-1.19;-0.01;0.09;0.59	21889;50647;53628;65486	3.79E-01;5.13E-01;3.89E-01;2.91E-01	11956;23814;26795;55553	4.28E-01;5.65E-01;9.65E-01;5.77E-01
CALM3	-1.10956	0.807813	4	TCTTCCCCCAGAGTTCAAGG;TGCTTACCTTGTCAAAGACA;CCTGCAGCTCTGCTTCAGTG;AGATGGCACTATCACCACCA	-1.78;-1.35;-0.82;-0.49	14460;19464;29018;37030	3.96E-01;6.73E-01;8.81E-01;1.28E+00	40412;48424;57978;62982	6.42E-01;4.82E-01;3.75E-01;3.59E-01
TTC30B	-1.00019	0.694571	4	CTTGTATGGTAAGTTTCCGG;ACCGATGGCCAGATCAACCT;GCTGCTATCAAGTACAGCGA;TCAGTGCTGAAGCATACTGT	-1.66;-1.39;-0.95;0.01	15632;18885;26112;51510	3.87E-01;6.90E-01;9.93E-01;7.08E-01	25932;51330;58557;61810	4.04E-01;5.23E-01;3.75E-01;3.92E-01
CALM1	0.0480292	0.808845	4	CTGACCGAAGAACAGATTGC;AGGAACTTGGAACTGTCATG;GGCATTCCGAGTCTTTGACA;CCATCATAGTCAAAAATTCG	-1.31;0.25;0.52;0.74	19961;57856;64146;68172	3.75E-01;6.69E-01;4.09E-01;2.21E-01	9270;13296;19586;57481	4.86E-01;9.16E-01;1.32E+00;5.18E-01
GSDMA	-0.014314	0.685373	4	CCCATAGGGGACGTACACGA;GGGATCCATAAATCACAAGG;GGAAGCGCTTGAAGTCGATG;GAATATGCTGGACACCCGAG	-0.77;-0.42;0.4;0.73	30009;39051;61602;68004	4.48E-01;4.26E-01;3.85E-01;2.26E-01	9438;15840;38391;47433	4.81E-01;7.99E-01;6.10E-01;8.52E-01
GSDMB	-0.700565	0.475137	4	AAGGGTAGCCAGATACTGCT;GGAATCTATCAGCATCAACA;TGGACACAGATGGGGACAAG;GCTGCTTTACTCGATAGCTC	-1.86;-0.98;-0.32;0.35	13747;25681;41906;60447	4.03E-01;5.31E-01;5.36E-01;4.30E-01	16995;35536;51761;63695	3.79E-01;4.32E-01;4.02E-01;3.39E-01
GSDMC	-0.927059	0.682273	4	GGAGCATCCATGGTCCACAG;AAGGCGCTGACTCTTCAGAA;GAGAGGGGACAACCTGTACG;CAAGTTCACATCCTCCCAGT	-1.5;-1.23;-1.2;0.22	17520;21214;21640;57226	3.78E-01;6.25E-01;1.20E+00;5.26E-01	20216;55802;56228;59922	3.75E-01;6.14E-01;3.77E-01;4.46E-01
GSDMD	-1.75675	1.01222	4	CCACGTACACGTTGTCCCCG;ACTGACCTGTCAGGAAGTTG;AGGTTGACACACTTATAACG;TGAGTGTGGACCCTAACACC	-3.72;-2.78;-0.41;-0.11	1260;6871;39205;47663	1.21E+00;1.41E+00;5.91E-01;8.43E-01	29779;38237;70571;76182	4.45E-01;4.26E-01;5.71E-01;2.85E-02
UPK1A	-0.683262	0.499655	4	TCGCCGGGCTCACGTAGTCA;GATGCTGACCTTCTACAGCG;CGAGAAGGGATCTCCAGTTG;CGCCCACCTCAATCATGACG	-1.6;-1.09;-0.24;0.19	16361;23622;43980;56504	3.82E-01;5.69E-01;5.00E-01;5.48E-01	20938;33462;53820;61081	3.77E-01;4.42E-01;3.88E-01;4.12E-01
UPK1B	-0.620357	0.566336	4	TTGCGGCATTGCCCTGACTG;TGCTGACAGGACAATTGCTG;CTCCAAACAATGATGACCAG;GCCCACAAATATGCCGATCC	-1.08;-0.82;-0.76;0.18	23750;28926;30350;56131	3.88E-01;4.83E-01;8.34E-01;5.59E-01	21311;47092;48516;53692	3.78E-01;4.68E-01;4.35E-01;6.36E-01
DLGAP2	-0.53161	0.559787	5	TCTGCACGGAGTGTACCAGG;ACCAGGACAGCCGCGCACAG;CGGGGAGTTGTAGTTCGCAG;CAAGGCAGGCAGATCACCTG;TTGTTCGGAAACATCCCGGG	-1.2;-0.81;-0.62;-0.53;0.5	21725;29304;33769;35879;63715	4.25E-01;4.64E-01;5.79E-01;9.08E-01;4.24E-01	13727;41563;43673;48138;55717	3.91E-01;5.43E-01;4.67E-01;5.49E-01;7.15E-01
DLGAP3	-0.0727731	0.73006	5	GCCGAGGCGGGCAGATCACG;GAAGTGGCGGCCGTCCATTG;CACACACTACCATACCAGCG;TGGGCGGTGATGGAGATGCG;CATACCATGATGGTCAGCCA	-1.31;-0.57;-0.47;-0.21;2.2	20055;35011;37579;44803;76727	4.08E-01;4.73E-01;5.19E-01;6.27E-01;2.01E-02	715;32639;39863;42431;57387	1.35E+00;4.63E-01;4.93E-01;6.91E-01;6.51E-01
DLGAP1	-1.25148	0.879989	8	TAGGACTACTCACTTGAGTG;GCTCTGGATGGTCCTAACGG;GGAATCTCACTCTGTCACCC;GCCGAGGCGGGCAGATCACG;CAAGGCAGGCAGATCACCTG;TCCTGCCTCAGCCTCCCGAG;GGTGGCTATGGTAGTCGTGG;TGGACAGGGTACACCCCACG	-3.69;-2.91;-1.53;-1.31;-0.53;-0.4;-0.13;0.48	1364;5906;17134;20055;35879;39519;47331;63421	9.05E-01;9.95E-01;7.60E-01;1.02E+00;7.33E-01;9.26E-01;1.00E+00;6.94E-01	14021;30111;37923;41563;57387;60308;71543;76078	4.46E-01;6.56E-01;6.43E-01;5.73E-01;6.63E-01;5.15E-01;4.56E-01;6.17E-02
DLGAP4	-1.15057	0.82125	6	GGGTCTTCTTATACGCCACT;CGACCGCCCAGCGTGACACG;GCCGAGGCGGGCAGATCACG;TAGGCGTGCATGAAGTAGCG;CAAGGCAGGCAGATCACCTG;GACACCAACTACGTCAAACG	-3.06;-2.91;-1.31;-0.99;-0.53;1.9	4796;5901;20055;25336;35879;76277	5.69E-01;1.20E+00;8.50E-01;1.11E+00;1.16E+00;3.95E-02	1165;41563;52106;57387;71540;72646	1.08E+00;7.01E-01;6.71E-01;5.18E-01;5.12E-01;1.67E-01
DLGAP5	-0.532193	0.465751	5	GATGATTGTGAATATAAACG;CAGAGAGAGAAAGCTAAACG;CAAGGCAGGCAGATCACCTG;CAAACAGTTAGAGGACCCAA;GATGTTCGAGCAATCCGACC	-2.16;-0.95;-0.53;0.05;0.93	11344;26238;35879;52754;70786	4.10E-01;4.79E-01;5.43E-01;4.64E-01;1.95E-01	6656;24688;41563;51204;66098	5.23E-01;4.93E-01;4.79E-01;4.90E-01;3.44E-01
FBXL14	0.260521	0.899415	4	TGTGACAACATCAGTGACAC;CGATCTCCTGCACAAACGCG;CCGCCTACCACAAGTCGGTG;CTCTAAAGCACATCTCCCGA	-0.41;-0.13;0.36;1.23	39356;47084;60641;73605	6.17E-01;4.67E-01;3.80E-01;8.83E-02	3837;16801;30358;38086	7.69E-01;7.62E-01;8.34E-01;1.23E+00
OIP5	-2.01257	1.3121	4	CCTTCAATGCCAACTAGGAA;CCACAAAAGTCCCCCCGGGG;TGGAGGTCGTAAAAGAAGCT;GGACCTGTCGCGGTCCCTCG	-3.96;-3.33;-0.39;-0.37	667;3042;39864;40437	1.47E+00;2.07E+00;5.77E-01;1.13E+00	37005;37578;74400;76775	5.65E-01;4.27E-01;8.56E-01;1.50E-02
FBXL19	-0.375087	0.554772	4	TCACCCTGGTAGGTGAAAGG;AGAAGCTAGAGCGTTTCAAG;CTGTGTGCGAACTGAGTGCG;TGCAGATTGTACACTCCATG	-2.34;-0.1;0.13;0.82	10000;48011;54737;69389	4.67E-01;4.77E-01;3.83E-01;1.91E-01	8053;22705;29431;67446	5.24E-01;5.89E-01;8.66E-01;2.40E-01
INO80B-WBP1	-0.708941	0.585892	8	TCATTATCCACAACCATAAG;CCTCCTGATAGGTCCCGAAG;TATTGGGATACCTGCTGTTG;TGAGAGTGGTCACTGCTGCG;CAAACTCAAAATCAAGCTTG;AGGCGCAACAGCAGCTAAAG;GCGGCTGCTTACTGCTCGAC;CCACTTTGAAGGAACAAATG	-3.31;-2.44;-0.48;-0.39;-0.19;0.0;0.02;1.11	3176;9332;37421;39866;45623;51369;51719;72638	6.11E-01;7.25E-01;6.33E-01;5.65E-01;5.60E-01;5.68E-01;8.03E-01;2.22E-01	4804;25723;26073;31819;37576;40021;68104;74269	4.99E-01;5.62E-01;5.62E-01;6.19E-01;6.87E-01;9.05E-01;4.06E-01;1.45E-01
PTPN18	-0.815212	0.626869	4	TGTGCACCGTGGATTATGTG;TGACCACATGCTCGCCATGG;GCCACTCACGCTGAACTCGC;GCAGTCGGCCAGAGAACGTG	-3.67;-1.28;0.84;0.86	1443;20400;69607;69924	1.15E+00;6.46E-01;5.32E-01;1.77E-01	7518;7835;57042;76001	5.44E-01;1.30E+00;3.76E-01;3.26E-02
PTPN13	-1.42427	1.08463	8	AAGGATCACCACTGGTCACG;CAAACCGTTGCAGAGTTGGT;TCACAATGGAGTGCGCACAT;GGAATCTCACTCTGTCACCC;GCCGAGGCGGGCAGATCACG;CAAGGCAGGCAGATCACCTG;TCCTGCCTCAGCCTCCCGAG;TTACTTACAAGAATAGACCG	-3.26;-3.13;-1.72;-1.53;-1.31;-0.53;-0.4;0.49	3433;4316;15024;17134;20055;35879;39519;63569	5.88E-01;1.21E+00;8.57E-01;1.21E+00;1.58E+00;1.10E+00;1.45E+00;6.86E-01	13873;37923;41563;57387;60308;62418;73126;74013	4.44E-01;9.26E-01;7.33E-01;1.02E+00;7.60E-01;5.39E-01;5.25E-01;1.57E-01
PTPN12	-0.188559	0.67011	4	ATATAGTCTGAATCTTGTGA;TTTGTGCCATAGATTATACG;AAGAAGGTCCCTCTCCAAGA;GGCCTGCCGAGAATTTGAGA	-1.42;-1.24;-0.2;2.1	18508;21054;45344;76603	3.75E-01;6.29E-01;4.78E-01;1.89E-02	839;32098;56388;58934	1.38E+00;4.52E-01;3.77E-01;4.74E-01
PTPN11	0.601229	1.51757	6	GATTACTATGACCTGTATGG;GAGAATCGCTTGAATCCGGG;CAAGGCAGGCAGATCACCTG;CTGACAGCGAATCATAACAT;AAATGTTACTGACCTTTCAG;TTATAAGAAGAATCCTATGG	-1.67;-1.64;-0.53;1.34;1.58;4.53	15596;15856;35879;74290;75412;77408	4.06E-01;5.99E-01;5.12E-01;1.68E+00;8.61E-01;1.11E-03	34;2030;3152;41563;61585;61845	2.58E+00;2.03E+00;2.92E+00;5.73E-01;4.08E-01;5.86E-01
PTPN14	0.362825	1.42514	9	GCCGAGGCGGGCAGATCACG;CAAGGCAGGCAGATCACCTG;TCCTGCCTCAGCCTCCCGAG;TCAACAACCACGGGAAGCCG;TGTGCTTACCGTGTGAAAGA;CAAGCCAGAGTTACCTTGCG;GCTGGCTCGGAAGAACCGAG;CATGACTGTCTCATAATCGG;ATTACGATGTACATTGGACC	-1.31;-0.53;-0.4;-0.11;0.37;0.61;1.0;1.73;1.9	20055;35879;39519;47694;60973;65926;71707;75867;76273	6.74E-01;1.00E+00;8.13E-01;8.19E-01;1.11E+00;9.78E-01;9.39E-01;8.09E-01;5.94E-02	1169;1575;5735;11516;16469;29748;37923;41563;57387	9.20E-01;1.89E+00;1.67E+00;1.56E+00;1.68E+00;1.20E+00;1.20E+00;1.54E+00;1.17E+00
LYAR	-0.608088	0.579167	4	CTTCACTTATGCATTTCACG;TCAGATCTGACTTACGCTGT;GAAGCGCAAAAAGGGACAGG;CTCCAAAGTGAAAGACGCCG	-1.06;-0.82;-0.46;-0.1	24080;29095;37885;48203	3.90E-01;4.81E-01;6.21E-01;8.24E-01	29239;39557;48347;53362	4.39E-01;4.26E-01;4.37E-01;6.47E-01
C2orf81	-1.35956	1.01428	6	AACGACAAATGGAAGCCGAG;GTCCGCGGTAGGCTTCCAAG;AAAAGGACGGCACTGAGAAG;CCAACACCTAAGAGACCTCG;CATGACTCGAGCCAGCAAGT;TCCGCAGCTGAGAGTCACGT	-2.27;-2.26;-1.86;-1.32;-0.89;0.43	10565;10624;13775;19811;27545;62358	4.05E-01;8.06E-01;1.20E+00;1.45E+00;1.66E+00;5.64E-01	15084;49897;57631;63666;66817;66881	4.03E-01;1.00E+00;8.60E-01;6.64E-01;4.05E-01;3.82E-01
C2orf80	0.56353	1.25106	4	AGGCAGAGAGATGAAACTCG;ATTATATTGGCATCAGACTT;GGAAGTCTTTAAAATTTATG;ATTAGGAAAATACCACTCCA	-0.25;0.46;0.49;1.55	43904;62932;63633;75288	7.35E-01;8.57E-01;4.03E-01;4.90E-02	2154;13809;14510;33538	9.90E-01;8.90E-01;1.67E+00;1.45E+00
C2orf83	-0.710693	0.500553	4	AACTTACCGTACAGACATGC;TGAATCATCAAGGCAATGAA;ACCACAGTCATCGTCACGAT;ATGACTGTGGTTGACAACCA	-3.43;-1.0;-0.04;1.63	2504;25230;49759;75572	9.31E-01;5.38E-01;4.21E-01;4.24E-02	1870;27683;52213;74935	1.05E+00;5.00E-01;3.99E-01;5.71E-02
C2orf82	-0.409099	0.502865	4	CACCGTCGCGCCAGGACCCG;CTTACCTGTGAGCACCGCAG;GGCCGGCTCGTTCCACAGCG;GCCGTCGGGAGAAGGCCCCG	-1.24;-0.61;0.09;0.12	21056;33967;53785;54566	3.77E-01;4.39E-01;3.88E-01;6.08E-01	22876;23657;43475;56386	3.84E-01;5.68E-01;5.08E-01;5.51E-01
C2orf88	-0.916172	0.721632	10	TTTCCAGACGAAGTTTACTG;TTCTCACCTTCATATATGGT;AGGTGTGAAACGATCTGCAG;GGAATCTCACTCTGTCACCC;CAGAAGAGAGATGTCTACCT;AAACAACCTGAATCCAACTT;ATCACAGTATTGGTCCCTGG;TGACGATTATCACGCTACAA;AGGGACCAATACTGTGATCT;TGATCAATCAGTTCCCGGAG	-3.64;-3.27;-2.25;-1.53;-1.18;-0.1;-0.04;0.21;0.72;1.91	1578;3387;10673;17134;22094;48067;49805;56856;67875;76290	7.71E-01;1.22E+00;9.54E-01;9.50E-01;1.05E+00;6.05E-01;6.05E-01;5.71E-01;4.24E-01;6.50E-02	1152;9567;20586;27637;29375;55348;60308;66769;74055;75864	8.86E-01;6.21E-01;5.86E-01;6.18E-01;7.39E-01;7.32E-01;6.46E-01;5.83E-01;5.34E-01;8.94E-02
LRRC37A10P	-1.17416	0.543911	1	CACTCCAGAACCCACTACGG	-1.17	22134	0.544	55311	0.146
MSMP	-0.674217	0.43571	4	CACGCCAACAGGATGCAGAC;TTTCCCCTCATAGTGACAGG;GCGGAGCCAAGACTCACCCA;CAGGCCAAGGGGATCCTAGG	-2.05;-1.12;-0.3;0.77	12169;23053;42421;68606	4.24E-01;5.81E-01;5.27E-01;2.10E-01	8836;35022;54389;65273	4.98E-01;4.34E-01;3.85E-01;2.97E-01
MZB1	-2.29024	1.55876	4	CAGCTACGGAGTTCGAGAAG;TCTACACGGATGTCCTGGAC;ACTTCATACCTCAAACTCTG;CACAGGCCCAGGACTTAGCG	-3.22;-2.62;-2.08;-1.24	3716;8110;11933;20978	7.81E-01;1.28E+00;1.91E+00;2.27E+00	56464;65509;69336;73730	1.24E+00;9.92E-01;5.22E-01;8.53E-02
TRAPPC6B	-0.645178	0.577311	4	GAAAACATGGGGTTTCGAGT;GGTTTACAAAAGATACTGCA;CTCCAGACACCATCTCGTTA;GTCTGGAGTGTACAAGTCCG	-1.03;-1.0;-0.66;0.11	24713;25186;32597;54424	3.95E-01;5.39E-01;7.63E-01;6.13E-01	23018;44845;52256;52729	3.84E-01;4.48E-01;3.98E-01;6.68E-01
HLA-DQB1	-1.11934	0.679325	4	GTGGTTTCGGAATGATCAGG;CGTTCCGCGGGATCTTGCAG;AGGTGACAGTTGCTACCCGA;CGACGTGGGGGTGTACCGCG	-2.05;-1.86;-0.61;0.05	12209;13714;33840;52576	4.24E-01;8.95E-01;7.26E-01;6.73E-01	24866;43602;63734;65238	3.96E-01;4.40E-01;4.04E-01;2.98E-01
MSMB	-1.0934	0.616471	4	ATTGCATAAAGTCACGAAGG;AACACCCAATAAACTCGGAG;TTAGAATGCATGGATCTCAA;GAGTTCCAGGAGATTCAACC	-2.24;-2.15;-0.58;0.6	10777;11423;34571;65616	4.50E-01;1.02E+00;7.06E-01;2.88E-01	11826;42871;66005;66668	4.30E-01;4.36E-01;4.37E-01;2.60E-01
HLA-DQB2	0.385541	1.00482	4	CAGATACATCTATAACCGCG;TCTGCACACCTTGTCCACCG;CGAGCTGGGGCGGAGCATCG;AGCTGCGCACGACCTTGCAG	-0.25;-0.22;0.28;1.73	43746;44637;58745;75885	7.30E-01;4.46E-01;3.75E-01;3.53E-02	1557;18697;32805;33696	1.12E+00;6.96E-01;7.56E-01;1.45E+00
HSPE1P11	-2.07955	0.811712	1	GCTGCTGAAACTGTAACCAA	-2.08	11947	0.812	65495	0.0728
LOC105376886	1.15092	1.24149	1	CTTGGAACCTACCCTCAAAG	1.15	73001	0.0256	4441	1.24
EIF4E1B	-0.538897	0.438039	4	AGGACTTTGCTGTCTCTGAG;ACAGCCGGTCCAGCTCAATG;TGAGGGTGGAATCCGAGAGT;GACAGCAGGAATAAACGGGG	-1.65;-0.74;-0.04;0.28	15729;30774;49742;58690	3.86E-01;4.63E-01;4.21E-01;4.82E-01	18752;27700;46668;61713	3.75E-01;4.99E-01;4.59E-01;3.94E-01
FOXS1	-0.000742084	0.909567	4	GGCACGCCGTGGACCCCTCA;CCCAAGGGCCTAAGCTTTGG;CGAATCGGCCCATGATGTAG;TGCCACGACATGTTTGAGCA	-2.2;0.39;0.72;1.09	11020;61307;67874;72456	4.45E-01;7.87E-01;4.78E-01;1.16E-01	4986;9568;16135;66422	6.76E-01;1.15E+00;1.54E+00;2.67E-01
HAPLN4	-0.328396	0.506336	4	AGTCTTGCAGCGTGACGTTG;CGGGTATCGCCATAACGCCG;AGACGATGGTGCCACCACGG;GCCTAGTGCCACGAAGACGT	-1.33;-0.79;-0.17;0.98	19739;29554;45967;71460	3.75E-01;4.76E-01;4.69E-01;1.40E-01	5982;31475;47888;57703	6.15E-01;4.57E-01;4.43E-01;5.11E-01
CAMKK2	-0.312775	0.591322	5	GAGACAGCTTGCGACCGGAG;TCCTGCCTCAGCCTCCCGAG;TGTTCGAACTGGTCAACCAA;ACGTGGTGAGACTCCACTGT;TGGAAGGTTTGATGTCACGG	-2.02;-0.4;-0.04;0.32;0.58	12374;39519;49649;59790;65347	4.00E-01;5.15E-01;4.69E-01;3.93E-01;3.69E-01	12095;17652;27793;37923;65066	4.02E-01;6.21E-01;7.21E-01;8.33E-01;3.78E-01
CAMKK1	-0.664718	0.481462	4	AGAGCCTACTAGAAACGGTG;AGGCTGGGCCTTATGCCACG;GGCCAGCCTCACCACACCGT;TCAGTTTGACCACATTCACG	-1.93;-0.96;0.11;0.12	13147;26036;54266;54648	4.10E-01;5.25E-01;3.85E-01;6.06E-01	22794;23176;51406;64295	3.83E-01;5.79E-01;4.05E-01;3.23E-01
MYDGF	-1.62997	0.983963	4	CGACGGTGGCGTTTGACGTG;TACAGATAGGACTTCCCCTG;CATTCCTTCTCCCATAACGT;TCACTTACGCCTCTCAAGGA	-2.5;-2.23;-2.0;0.21	8941;10801;12564;56989	4.95E-01;1.06E+00;1.84E+00;5.33E-01	20453;64882;66641;68501	3.76E-01;9.56E-01;4.49E-01;2.13E-01
LOC105377286	-0.452357	0.811406	12	AGATTCAGGTAGAGCGCTAA;CCTAGAGTTACTGGTCTCAG;TCACGGTCCCAGGTAGACTT;GTAGAGCGCTAAGGGATGTG;CTAAACCAGGGAATGGACAA;CAACTGCCGGCTGTGCAGAG;TGAGTCACCAGACCAGTGCA;TCAGGACCGGGTTGACCACG;GTCACCAGACCAGTGCAAGG;GAGGCAGATCAAGCTGCTCA;TCATCGTGTGGAGCGCATCA;GGAATCGCAGCTCCCCCAAG	-3.41;-2.94;-1.85;-1.17;-1.1;0.07;0.14;0.24;0.62;0.69;0.72;2.57	2598;5683;13848;22154;23403;53164;55105;57722;65955;67293;67775;77008	5.58E-01;7.80E-01;6.70E-01;6.50E-01;7.94E-01;1.04E+00;8.36E-01;7.03E-01;7.71E-01;5.56E-01;4.61E-01;2.92E-02	434;9667;10149;11487;19720;22337;24278;54039;55288;63594;71748;74840	1.20E+00;5.67E-01;8.54E-01;1.18E+00;9.65E-01;1.16E+00;1.44E+00;6.34E-01;6.05E-01;5.31E-01;4.19E-01;1.78E-01
CHMP3	-1.86668	1.58333	8	CCAAGGAGATGATCAGGTCA;GTTGTTGACAGGCAAATAAG;ACATGAACTCAGTGCTCATG;AGGAAATGAGAGTTGTTGAC;GCCCTTACCAGTTCTTTGGG;TCAATGACCACTCATTGACC;ATGGGGATGAAGAACCAGCT;GTTGTCCAAAGAAATGATGA	-3.64;-3.57;-2.72;-1.97;-1.71;-0.62;-0.55;-0.16	1579;1831;7335;12779;15142;33761;35363;46478	8.50E-01;1.87E+00;1.54E+00;1.60E+00;2.08E+00;1.21E+00;1.74E+00;1.77E+00	30964;42079;43681;62300;64663;70107;75611;75863	1.05E+00;1.13E+00;8.01E-01;1.37E+00;9.91E-01;8.59E-01;7.96E-01;7.15E-02
RPL36AL	-2.49523	1.77469	4	AGGGAAGGAGGCGCTATGAT;AAAGTGACACAGTATAAGAA;AGAACCTTCTGTAAGAAGTG;AAGGATTCTTTGTATGCCCA	-4.4;-3.35;-1.88;-0.34	138;2938;13537;41155	2.15E+00;2.10E+00;1.75E+00;1.10E+00	36287;63905;74508;77304	5.51E-01;9.04E-01;8.70E-01;3.08E-03
CHMP7	-0.855532	0.610021	4	CAGATTGTGAAGTTTGCCCG;ACGGACAGAGAAGCGCATCG;CGCTTTCAAGAGGAGTCGCG;TGGACTCTTTCTAACATGCT	-1.88;-0.81;-0.66;-0.07	13530;29142;32678;49050	4.06E-01;4.81E-01;7.60E-01;7.93E-01	28392;44764;48300;63912	4.29E-01;4.47E-01;4.37E-01;3.34E-01
CHMP6	-2.36914	1.79929	5	CCTTGTCCTGCTCCGTGACG;GTGTCTGAACAAGATGCACC;GCTCAAGAAGAAGCGATACC;CCAGATCGAAATGAAAGTGA;CAAGGCAGGCAGATCACCTG	-3.51;-3.21;-3.08;-1.51;-0.53	2099;3803;4656;17353;35879	9.16E-01;1.68E+00;2.72E+00;2.01E+00;1.67E+00	41563;60089;72774;73632;75349	9.08E-01;1.17E+00;1.52E+00;6.97E-01;5.95E-02
CHMP5	-0.949805	0.55131	4	GACTGACTGCATTGGCACGG;TGCCCAACAGTCATTCAACA;GATGAGAGAGGGTCCTGCAA;AGCTGGTCTTGTAAATCCTA	-2.75;-0.91;-0.2;0.07	7081;26969;45156;53179	5.62E-01;5.10E-01;4.81E-01;6.53E-01	24263;32286;50473;70352	3.92E-01;4.50E-01;4.14E-01;1.67E-01
LOC100652758	-0.620402	0.486579	4	CTGCGGGAGTGGAGCCCTGG;GTCTCGCTCATCTCGGACCC;TGGGGCTCCACTGACGCCGA;CGGGCTAGCCCCGCGCAGGG	-3.08;-0.23;0.23;0.6	4645;44381;57530;65641	7.00E-01;4.45E-01;3.75E-01;2.87E-01	11801;19912;33060;72795	4.30E-01;6.60E-01;7.49E-01;1.07E-01
OR52N5	-0.466547	0.461241	4	CATGTGGTCGCAGTACGTAT;CAGCAATACACCCCTCAGGA;CAAGACCAAGATTCCCCACA;AGTGTGGTAGCATAACGCAA	-1.42;-0.52;-0.23;0.3	18589;36121;44369;59281	3.75E-01;4.30E-01;4.93E-01;4.64E-01	18161;33073;41321;58853	3.76E-01;4.45E-01;5.48E-01;4.77E-01
OR52N2	-0.348804	0.841302	4	TGTACATCATTGCTGTCGTG;GCACAGCATATTAGGTACCA;TCTGTGGCCAAGGTATCCTG;AGCGCCTGCCCTATTGCCGG	-4.36;-0.78;0.2;3.55	166;29767;56677;77340	2.07E+00;4.74E-01;3.76E-01;2.27E-03	102;20765;47675;77276	2.28E+00;6.36E-01;4.45E-01;3.71E-03
OR52N1	-0.314802	0.568127	4	GGATGGTGGCATAACGCAGA;ATGCTGTACATGGTACACAG;TCTGTGGCCAAGATATCTTG;ATCAAAGCCCCCAATCAGCA	-1.62;-0.01;0.01;0.37	16089;50573;51438;60800	3.84E-01;5.11E-01;4.05E-01;4.20E-01	16642;26004;26869;61361	3.81E-01;5.25E-01;9.62E-01;4.04E-01
CHST5	-0.131052	0.665508	4	GTGCACACGATCCTCGCCGC;GCTGGGCACCAACGGCAAGT;GCGGACAGGTTTCGGCTCTG;GTGGTCCACACATGCCACGC	-0.61;-0.2;-0.03;0.31	33964;45361;50117;59374	5.08E-01;4.52E-01;4.17E-01;4.62E-01	18068;27325;32081;43478	3.76E-01;5.05E-01;7.78E-01;1.00E+00
LY6G6C	-0.217737	0.660239	4	TATATGTCAGACCCAGCTTG;ACCAGAAGAGCCCTGTCAGG;GGTCCACACAGCCCAGCACA;CCCACCCCTAGGTAAGATGT	-0.77;-0.07;-0.06;0.03	30034;48814;49349;52093	4.49E-01;4.87E-01;4.25E-01;6.89E-01	25349;28093;28628;47408	4.00E-01;4.94E-01;8.95E-01;8.52E-01
LY6G6D	0.426681	1.03746	4	CAAGTGGAGACAGAGTCGGT;CCCCAGCAGTTCTTGCAAAG;CGAATGCGGTGCTACAACTG;TTGGTGAATCAAGGTCACTG	-0.3;-0.11;0.43;1.69	42254;47880;62242;75770	6.89E-01;4.76E-01;3.90E-01;3.79E-02	1672;15200;29562;35188	1.09E+00;8.26E-01;8.61E-01;1.37E+00
HOXA11	-1.63017	0.949732	4	GCCACTAAATGGCACCCCCG;CGAGACAGCCTACGGCACCC;GCAACTTCAAGTTCGGACAG;AGAAATTGGACGAGACTGCG	-3.97;-2.27;-0.92;0.64	644;10512;26872;66491	1.49E+00;1.08E+00;9.62E-01;2.65E-01	10951;50570;66930;76798	4.46E-01;5.11E-01;4.55E-01;1.45E-02
HOXA10	-0.498549	0.50668	4	GACCAAAAAAGAGTTCGCGG;CTACTGCCTCTACGACTCGG;GGCGGTTACTACGCCCACGG;AGATCGAAACCGCGCCCCGG	-2.54;-0.57;-0.24;1.35	8674;34968;44213;74359	5.03E-01;4.34E-01;4.96E-01;7.06E-02	3083;33229;42474;68763	8.51E-01;4.44E-01;5.26E-01;2.06E-01
GALNTL5	-1.02153	0.76556	5	CAAGAAAATAGTGTGGCGTG;TGAGGTGAACAGAGTATGGC;AAGCCCTCTCCTCTTGTAAG;CAAGGCAGGCAGATCACCTG;AGAAAAACTAGACTATCACC	-2.88;-0.71;-0.69;-0.53;-0.29	6122;31343;31846;35879;42667	5.46E-01;4.62E-01;6.18E-01;9.08E-01;1.29E+00	34775;41563;45595;46099;71325	6.84E-01;5.43E-01;4.62E-01;5.95E-01;1.79E-01
RPS4XP2	-2.74176	1.03497	1	TGTACATCGTATTACACCTG	-2.74	7145	1.03	70297	0.042
GALNTL6	-0.738655	0.562085	7	CCTTCCAGAAGAATACCCAA;GCCGAGGCGGGCAGATCACG;GTATAATTAACCGAACCCCA;CAAGGCAGGCAGATCACCTG;CCTCATACCCGAAGTGATTG;TCTGTACAAGGATAAGCACC;ATATGACCAACTCTAGAACA	-2.7;-1.31;-1.07;-0.53;-0.44;0.11;0.76	7455;20055;23953;35879;38540;54324;68532	4.35E-01;5.02E-01;6.28E-01;6.03E-01;7.91E-01;6.04E-01;3.72E-01	8910;23118;38902;41563;53489;57387;69998	4.12E-01;4.98E-01;5.65E-01;5.39E-01;5.01E-01;5.23E-01;3.07E-01
LINC02018	-0.399969	0.310068	1	TCCTGCCTCAGCCTCCCGAG	-0.4	39519	0.292	37923	0.31
HNRNPCP2	-2.25072	0.860684	1	AGGTGTGAAACGATCTGCAG	-2.25	10673	0.861	66769	0.0644
LINC02014	-0.625	0.662795	5	TGTGACCGTCTACGACAAGC;TGTGCTGGAAATGCTTCTGG;CTGAGGACCCAGACACAGAG;CAAGGCAGGCAGATCACCTG;GTCCTCGGCCCTCCAGCCAG	-1.01;-0.89;-0.78;-0.53;0.09	25126;27511;29774;35879;53645	4.71E-01;4.71E-01;6.67E-01;9.08E-01;7.97E-01	23797;41563;47668;49931;52316	4.51E-01;5.43E-01;4.63E-01;5.13E-01;8.52E-01
KRTAP11-1	-1.12535	0.770029	4	CACAGCAGGTCTCTTGACAG;GGTGGAAGTCGTGGTAACTT;CCTGCTCAACTACCTACAGC;TTTGTCGAGAGCAAGTCACC	-2.16;-1.23;-0.62;-0.49	11360;21236;33551;36991	4.38E-01;6.24E-01;7.34E-01;1.28E+00	40451;43891;56206;66082	6.43E-01;4.42E-01;3.77E-01;2.76E-01
TDG	-1.65718	1.01692	4	TCTGTGTCTGGAATCTTATG;CCGGCAGCAAAGATCTCTCC;CCTGCTCAGGAACCAGTGCA;TTTATAGATTGGCATAAACC	-2.74;-1.97;-1.7;-0.22	7183;12764;15280;44614	5.57E-01;9.44E-01;1.61E+00;9.58E-01	32828;62162;64684;70265	4.89E-01;8.22E-01;4.16E-01;1.69E-01
SCAMP1-AS1	-1.64118	0.688777	1	GAGAATCGCTTGAATCCGGG	-1.64	15856	0.689	61585	0.0995
GOLGA8IP	-1.34563	0.94074	7	GCTGCAATGAATGTTGCAGG;TATGCGTCGGGTAGAGAAGC;ATCTGAGAGAACGTTTCATG;ACTCCGTACCTGCTTTACTG;CCTCAGACAGCCACTTCTGG;TCTCATTACAGAAAAGTCCA;GTTAGAGCAGTCCATGCGGG	-3.65;-2.06;-2.04;-0.98;-0.86;0.0;0.18	1513;12067;12236;25547;28219;51012;56222	9.15E-01;6.60E-01;1.16E+00;9.04E-01;1.26E+00;7.10E-01;9.73E-01	21220;26208;49222;51895;65206;65378;75929	5.52E-01;5.16E-01;8.00E-01;5.96E-01;6.54E-01;4.04E-01;5.99E-02
LOC101060084	-1.52854	0.655112	1	GGAATCTCACTCTGTCACCC	-1.53	17134	0.655	60308	0.109
LOXHD1	0.485408	1.3683	5	GCCGAGGCGGGCAGATCACG;CCGACGGAGACCCGACTCAG;GTGTACTGCTTGCCTTGACG;CTACCTAACCATCTACGGCG;ATAATCGAGAAGTTTAGGGT	-1.31;0.39;0.58;1.11;1.65	20055;61392;65399;72695;75642	4.08E-01;1.25E+00;8.37E-01;6.24E-01;5.10E-02	1800;4747;12043;16050;57387	9.76E-01;1.51E+00;1.57E+00;2.14E+00;6.51E-01
LRRC26	0.840041	1.67035	4	GCACGCACGTGCACACCTCG;AGTGCAGCCCGTTCTCGCGC;CAGGTGCAGCGCGTCTAGAG;GCCGGTTGCCGGCCAATGAG	-0.15;0.86;0.99;1.67	46546;69927;71517;75719	8.16E-01;1.34E+00;6.18E-01;3.91E-02	1723;5925;7515;30896	1.08E+00;1.52E+00;2.48E+00;1.60E+00
LRRC25	-0.87817	0.659001	4	GCGGAGGACACGGTGCACGA;GCCACTGAAATTCAGGCACG;GAGACTCTGGCGATGCCGAG;CCCCATCCACACGAGACAAG	-1.85;-0.72;-0.69;-0.25	13834;31145;31843;43852	4.02E-01;4.60E-01;7.86E-01;9.88E-01	33590;45599;46297;63601	5.02E-01;4.54E-01;4.64E-01;3.42E-01
LRRC24	-1.96886	1.25494	4	TGGAGGACCAGGCTCTAGCG;CAGAGGGCGGAATGCAGATG;AAGGTGCCCCAGCCTCGCGA;CAGGGCGCCACACTCCACCG	-4.05;-3.28;-0.49;-0.04	489;3317;36932;49616	1.61E+00;2.00E+00;6.44E-01;7.73E-01	27826;40510;74125;76953	4.23E-01;4.28E-01;8.23E-01;1.10E-02
LRRC23	-0.945557	0.598597	5	AACCAGATTACTGACACTGA;GCCGAGGCGGGCAGATCACG;AGGTGGGTGAGGTAGTTGAG;GCAGGCTGATCAACTTCTCG;GTAGGGCAGTTCATTCATCT	-2.69;-1.31;-0.68;-0.25;0.2	7488;20055;32266;43778;56772	4.92E-01;5.64E-01;6.09E-01;6.54E-01;6.74E-01	20670;33664;45176;57387;69954	4.14E-01;4.67E-01;4.63E-01;4.08E-01;2.21E-01
MPDU1	-0.968972	0.69951	4	ACTACAGTCAAGGGCGTCAG;TTCCTGGTCATGCACTACAG;TGGAGCTAGTGGCATTGACT;TGGGAGCCAAGAGTGCTGAA	-1.5;-1.41;-1.29;0.32	17459;18677;20299;59805	3.78E-01;6.97E-01;1.27E+00;4.49E-01	17637;57143;58765;59983	3.77E-01;6.49E-01;3.75E-01;4.44E-01
LRRC20	-0.959889	0.794787	6	TCTGGCCAGAGACATTCCGC;ACCACATTCAGTCAGCTCCG;GCCGAGGCGGGCAGATCACG;AGGCCGTGGCCAGAGTAGCA;CAAGGCAGGCAGATCACCTG;CTTAAGCTCGTTGTTAGCCA	-1.86;-1.42;-1.31;-0.69;-0.53;0.06	13710;18506;20055;31936;35879;52898	3.97E-01;5.42E-01;8.50E-01;8.25E-01;1.16E+00;9.93E-01	24544;41563;45506;57387;58936;63733	5.49E-01;7.01E-01;5.46E-01;5.18E-01;4.36E-01;5.08E-01
MATCH_LIMIT_EXCEEDED_1	0	0.46643	1	TGTAGTCCCAGCTACTTGGG	0	51216	0.18	26457	0.466
LRRC29	-0.635233	0.603727	4	GACTGATGCCAGTTTAGCCA;GAGTTCTGGCAACAGGCTAA;AGCCCCGTGCATACAGCCCA;TGCAGCCGACTCAGTGACAA	-1.27;-0.55;-0.49;-0.23	20551;35463;37014;44439	3.76E-01;4.32E-01;6.42E-01;9.65E-01	33003;40428;41979;56891	4.92E-01;4.28E-01;5.35E-01;5.36E-01
LRRC28	-1.52095	1.21032	8	CAGCCATGGAGAGCTCATTG;GGGAACGCTCACGGACTGTG;GTTTGCTAACTTTACCCGAG;GGAATCTCACTCTGTCACCC;GACTATGATTACCTGGAGGT;GCCGAGGCGGGCAGATCACG;AGAACTACAGTATGTATACG;CACCTTCAACTAATTGGATG	-4.22;-2.94;-1.91;-1.53;-1.36;-1.31;0.41;0.7	274;5658;13292;17134;19279;20055;61723;67516	1.56E+00;1.02E+00;9.57E-01;1.21E+00;1.64E+00;2.33E+00;4.79E-01;4.77E-01	9926;15719;57387;58163;60308;64150;71785;77168	4.06E-01;5.29E-01;1.58E+00;1.07E+00;7.60E-01;5.74E-01;4.64E-01;1.23E-02
GCNT4	-0.183228	0.643748	4	AATATCTGAATGTTATGGGG;TCTGTTTCTTACAAAAGGCG;GCACCCGTCTAAGTTCATGA;TGTGCTGGTTGTATATAGCA	-0.51;-0.39;-0.37;0.54	36499;39805;40333;64513	5.55E-01;4.27E-01;5.67E-01;3.17E-01	12929;37109;37637;40944	4.13E-01;4.27E-01;6.27E-01;1.11E+00
GCNT7	-0.490783	0.670576	9	TATAACTATTCATAAGGAGC;AAATAAATGGTTAAGTTATG;AGTCCTCCTGGCCTTCGAGG;TAAAGGCATAGCTGCAGGTG;AAGCGGAACACAGTTCATCT;TGACACTGCAGTATCACAAA;GAATGCACAGTCTTTGTTGG;TAAGACTGCTGTGCAAACCT;CCGTATTGCACCTTCCCCTG	-3.16;-1.39;-1.39;-1.3;-0.05;0.35;0.56;0.64;1.31	4136;18866;18979;20164;49436;60516;65057;66499;74144	5.09E-01;5.19E-01;6.40E-01;8.92E-01;6.41E-01;7.00E-01;5.66E-01;4.25E-01;1.70E-01	3298;10943;12385;16926;28006;57278;58463;58576;73306	5.68E-01;6.06E-01;9.18E-01;1.08E+00;8.88E-01;6.15E-01;5.20E-01;6.29E-01;2.14E-01
GCNT1	-0.121234	0.719576	6	TCGCCCAAGCTAGAGTGCAG;CAAGGCAGGCAGATCACCTG;TCATGTGGACACAAAATCCG;AATTTAAAAAGCGCCCTCGG;AGAGTGTGGTTTATGCATCG;TCCGCCTCTTCTTTACTAAG	-1.41;-0.53;-0.2;0.23;0.38;0.8	18711;35879;45206;57321;61255;69130	4.39E-01;5.73E-01;5.42E-01;5.17E-01;4.11E-01;2.96E-01	8312;16187;20121;32236;41563;58730	4.38E-01;5.91E-01;8.47E-01;8.14E-01;9.07E-01;7.21E-01
GCNT3	-0.28722	0.766913	4	GAACATATACTGTGTCCATG;GAGGAATAGCATGGAGTCAG;AACTGTTCAGGGGTCACCCG;AATACTTCCTGAATACATGT	-2.7;-0.73;1.11;1.18	7408;30993;72655;73241	5.48E-01;4.61E-01;6.90E-01;9.69E-02	4201;4787;46449;70034	7.36E-01;1.70E+00;4.62E-01;1.75E-01
GCNT2	-0.456367	0.574021	5	AGGGAAAAATATCACCCCAG;TTGCAAGGGACACTTCGCAA;CAAGGCAGGCAGATCACCTG;AAATGTCTACTGTGTTCACG;CAAGAGCATACAGATAAAGG	-1.08;-0.58;-0.53;-0.2;0.1	23802;34819;35879;45303;54049	4.51E-01;4.72E-01;5.43E-01;6.14E-01;7.81E-01	23393;32139;41563;42623;53640	4.46E-01;4.62E-01;4.79E-01;6.86E-01;7.97E-01
CCL3P1	0.0659779	0.5029	1	ATTCTGTGGAATCTGCCGGG	0.07	53116	0.164	24326	0.503
MBD3L2B	-1.28779	1.2062	12	CAAAAGGAACATGATGCCCT;CGTCTTAAGTATCCTTGCAC;GATGCAGCTGGTGAGTCTCA;ATGCAGCTGGTGAGTCTCAT;TCTTAAGTATCCTTGCACCG;CTGCGCCTACCGGAGACTGC;GGGGACGGCCGGTGAATCTC;TGCAGCTGGTGAGTCTCATG;GGAGGCCGGTGACAAGGATC;CAGAAAAGGGGACGAGCACC;CGTTTCTTCTGTAAAGCCCA;GAAGAAACGAGAAATCCACA	-4.01;-2.89;-2.08;-1.86;-1.45;-0.99;-0.7;-0.65;-0.58;-0.48;-0.35;0.57	571;6011;11965;13762;18178;25439;31700;32868;34757;37315;41054;65214	1.09E+00;7.51E-01;7.47E-01;9.86E-01;1.06E+00;9.73E-01;9.60E-01;1.24E+00;1.57E+00;1.92E+00;2.28E+00;8.96E-01	12228;36388;40127;42685;44574;45742;52003;59264;63680;65477;71436;76871	5.43E-01;1.59E+00;1.37E+00;1.12E+00;9.06E-01;7.34E-01;7.29E-01;7.53E-01;6.73E-01;5.31E-01;4.17E-01;3.85E-02
LPCAT4	-0.222555	0.563406	4	ACATTACCTTAACCCTCTGG;TTGAGACCCTTACCCACCTG;ACTGGGAAAAGTGCTTCGGA;CAGGACTGTGTGCCACAACG	-0.98;-0.38;-0.28;0.75	25549;39953;43046;68342	4.01E-01;4.27E-01;5.16E-01;2.17E-01	9100;34396;37489;51893	4.91E-01;4.37E-01;6.31E-01;6.95E-01
LPCAT2	-0.864624	0.749704	8	TGACCCACCCAATAACTGGT;ACTGGTGAAATGCTGCTGAG;AGACGCAGATCGGCTCCGCG;GCTGGCTGGACCAGACATGG;TATTATAGGATACTGTGACC;TGTTTATAAGCAGTATGACA;TCGGGAATCCGGATCTACAC;GTCATGGACAGTGACACGAC	-2.47;-1.62;-1.29;-1.17;-0.63;-0.5;-0.39;1.16	9103;16088;20269;22140;33459;36816;39874;73048	4.07E-01;5.25E-01;6.57E-01;9.15E-01;8.11E-01;1.05E+00;1.43E+00;2.03E-01	4394;37568;40626;43983;55302;57173;61360;68339	5.21E-01;9.11E-01;7.07E-01;5.96E-01;6.14E-01;5.08E-01;4.87E-01;4.34E-01
LPCAT3	0.982324	2.36046	6	GCCGAGGCGGGCAGATCACG;CAAGGCAGGCAGATCACCTG;TGGTGCGGCCCATTAGTCGA;GCGCGTCAGAACAGGCGCTG;TAGTGATTCATTGAGAACTG;CTGTTGACTACTTTGACGGA	-1.31;-0.53;1.18;1.86;2.33;2.36	20055;35879;73289;76200;76839;76855	4.59E-01;5.73E-01;2.58E+00;2.44E+00;1.35E+00;1.98E-02	587;603;1242;4153;41563;57387	1.36E+00;3.06E+00;4.11E+00;3.95E+00;9.07E-01;7.81E-01
LPCAT1	-1.2927	0.705458	4	GAAGAGCGTCAGTGTCATGA;GCGTCGAAGTAGGACGAGTG;TCACAACCAAGTGGAAATCG;CTCGAACGTGTAGTCAGTCA	-2.86;-1.75;-0.79;0.23	6232;14789;29612;57523	6.02E-01;8.44E-01;8.60E-01;5.17E-01	19919;47830;62653;71214	3.75E-01;4.75E-01;3.93E-01;1.46E-01
LOC105372550	-0.592383	0.49575	3	CTCACATACCCCACACACGT;CTCTCGGAACGGCCTCAGAG;CAACGCTAATCATACACGAA	-1.06;-0.56;-0.15	24068;35184;46579	3.54E-01;4.71E-01;6.62E-01	30863;42258;53374	3.64E-01;3.92E-01;4.85E-01
TAGLN	-1.85635	1.08897	4	CTTCCTCTCTACCTTCAAAG;CCTGGAAGCCCAAGCGCCCA;GAAGGCGGCTGAGGACTATG;AATCGAGAAGAAGTATGACG	-3.4;-2.9;-1.78;0.65	2661;5981;14498;66624	9.07E-01;1.52E+00;1.67E+00;2.61E-01	10818;62944;71470;74781	4.49E-01;8.57E-01;6.15E-01;6.07E-02
CCDC178	-0.382812	0.568728	4	AGGTGCTGGAATATTTACTA;TAAAAGTCTAGAAACTGACC;TCTGCTTAGAGTCCAGTAGA;TAGAACCAAACTTTGAGACA	-0.72;-0.69;-0.09;-0.03	31300;31959;48296;49959	4.66E-01;4.53E-01;4.38E-01;7.61E-01	27483;29146;45483;46142	4.19E-01;4.81E-01;4.76E-01;9.00E-01
CCDC179	0.313907	0.95802	4	AAGACAACATCATCCTTCAG;ATCCTTCAGAGGTCACTGAG;AACACCTAAAGAAAGAGAAG;CAGACTCACAGGGTTGACTT	-0.29;-0.17;-0.05;1.76	42780;46085;49566;75946	7.03E-01;4.58E-01;4.23E-01;3.39E-02	1496;27876;31357;34662	1.14E+00;4.97E-01;8.01E-01;1.40E+00
ALPP	-0.550454	0.479372	4	CCCGGACTTCTGGAACCGCG;TTGTCTACATTGTATGTCTG;CGAAAGTACATGTTTCGCAT;CGGCGTCCGAGTACCAGTTG	-1.14;-1.11;-0.38;0.43	22776;23177;39947;62216	3.83E-01;5.79E-01;5.75E-01;3.80E-01	15226;37495;54265;54666	3.90E-01;4.27E-01;3.85E-01;6.05E-01
CCDC170	-1.05825	0.882817	6	CTAGCAGAGAAACGATCATG;GCCGAGGCGGGCAGATCACG;GAGCATGACTGGGTCCACTG;CAAGGCAGGCAGATCACCTG;GTTAAACCACTATCGGAATG;TTCACCAGAAAGCTCTCCAG	-2.86;-1.31;-0.65;-0.53;-0.51;-0.49	6246;20055;32897;35879;36533;37143	4.98E-01;5.18E-01;5.35E-01;7.01E-01;1.13E+00;1.91E+00	40299;40909;41563;44545;57387;71190	1.10E+00;6.83E-01;5.12E-01;5.28E-01;4.59E-01;2.19E-01
CCDC171	-0.397903	0.638761	8	GCGCATGATCGGCTATAGAG;TCGCCCAAGCTAGAGTGCAG;GCCGAGGCGGGCAGATCACG;CAAGGCAGGCAGATCACCTG;TCCTGCCTCAGCCTCCCGAG;AAGCGTTGGAAAAACATCAA;AGGATCCAAGAAAAACTCTG;TCACACCTTATATCAGCACT	-1.56;-1.41;-1.31;-0.53;-0.4;0.5;0.68;0.84	16725;18711;20055;35879;39519;63863;67143;69738	5.02E-01;5.07E-01;6.63E-01;5.73E-01;6.43E-01;5.67E-01;4.07E-01;3.64E-01	7704;10299;13579;37923;41563;57387;58730;60717	4.18E-01;6.77E-01;9.39E-01;5.64E-01;6.06E-01;5.07E-01;5.55E-01;8.45E-01
CCDC172	0.0139379	0.726414	4	ACAGTGAAATTACAAACCAT;AAAAATTAAGAAAGCAACGG;CAAGCAAACATGTTGAAAAG;AGTCGCCGTTTGATGCGAGA	-1.12;0.04;0.34;0.8	23006;52339;60128;69116	3.84E-01;5.41E-01;3.78E-01;1.98E-01	8326;17314;25103;54436	5.15E-01;7.43E-01;1.04E+00;6.12E-01
CCDC173	-0.456298	0.646627	5	AAAAGCGTCTTATACAAATG;CAAGGCAGGCAGATCACCTG;GCATTTGCGATCTCAAGAAG;GAAGAAGAAATATACAAACA;AAAACGACACAGAGAAAGGG	-0.86;-0.53;-0.48;-0.37;-0.03	28079;35879;37304;40351;49899	5.24E-01;4.79E-01;5.22E-01;7.53E-01;9.54E-01	27543;37091;40138;41563;49363	5.14E-01;4.89E-01;4.91E-01;7.16E-01;9.78E-01
CCDC174	-0.613506	0.558127	5	GGAATCTCACTCTGTCACCC;GAGGCCCGGCAACTTGGTGT;AAACATAAAGGAAAAGCGAA;ATCTGGAGCAAACAGAATGT;ACTTCAGCGCCAGCAATGGG	-1.53;-0.9;-0.59;-0.16;0.11	17134;27323;34442;46334;54267	3.91E-01;4.72E-01;5.67E-01;5.89E-01;7.72E-01	23175;31108;43000;50119;60308	4.43E-01;4.61E-01;4.70E-01;5.09E-01;5.43E-01
CCDC175	-0.930359	0.507886	4	TTTATTCTTTCTTACCGCTG;TCTTCCCAATAGCATTAAGA;ACGAATTGAATTACTTAACG;AAAACAAGAGTTGACTGCAC	-2.72;-1.18;-0.33;0.51	7286;22039;41612;63963	5.53E-01;6.04E-01;5.42E-01;3.32E-01	13479;35830;55403;70156	4.06E-01;4.31E-01;3.80E-01;1.72E-01
CCDC177	-0.61995	0.618368	4	CCACCGGCTTGACCGCACAG;TTTCACGCCTTTGAGCCCCG;GCATCGTCGTCATCCTACAG;GCGGCCGGTGATCGGAACCA	-1.07;-0.76;-0.33;-0.32	23992;30200;41521;41810	3.90E-01;4.69E-01;5.44E-01;1.07E+00	35632;35921;47242;53450	5.38E-01;4.31E-01;4.51E-01;6.44E-01
PDK1	-0.48606	0.597795	6	CCATCTCATCGAAAACACAT;ACCAGGACAGCCAATACAAG;TTGCCGCAGAAACATAAATG;CAAGGCAGGCAGATCACCTG;TCCTGCCTCAGCCTCCCGAG;AGCGCGCGTAGAAGTCCACC	-1.53;-1.23;-0.76;-0.53;-0.4;1.53	17110;21226;30352;35879;39519;75237	4.20E-01;5.05E-01;5.67E-01;7.01E-01;9.93E-01;7.52E-02	2205;37923;41563;47090;56216;60332	8.30E-01;6.13E-01;5.12E-01;5.02E-01;4.80E-01;6.51E-01
PDK3	-0.963238	0.690657	6	TAAGCATGCGGAAAGAGATG;GCCGAGGCGGGCAGATCACG;CAAGGCAGGCAGATCACCTG;TAGCATATGAAACAGATGTG;ACATCCGCCACGTTACAGGT;TTACTTAACCGCCCTTCAGT	-3.45;-1.31;-0.53;-0.49;-0.05;0.04	2405;20055;35879;37099;49599;52495	7.98E-01;5.18E-01;5.12E-01;6.69E-01;6.34E-01;1.01E+00	24947;27843;40343;41563;57387;75037	5.58E-01;4.86E-01;5.07E-01;5.73E-01;4.59E-01;8.22E-02
PDK2	-1.86622	1.10218	4	GGTGCTGCCATCAAAGATGA;CTTGAGTACAAGGACACCTA;CAGGAGCTTAGCCATGTCGT;CTCCAAACAGCCGATTCACA	-3.62;-2.24;-1.69;0.09	1623;10794;15324;53694	1.10E+00;1.06E+00;1.60E+00;6.36E-01	23748;62118;66648;75819	3.88E-01;8.21E-01;4.49E-01;3.68E-02
EBP	-0.795205	0.645887	4	AGTGTGTGGGTTCATTCACC;GCCAGCCAGTATATGCCAGG;GCTGTTGTCAGGTCGTGCTG;GAAAGGCGATCACCACCCAC	-1.25;-1.22;-0.53;-0.18	20957;21358;35944;45681	3.77E-01;6.21E-01;6.69E-01;9.17E-01	31761;41498;56084;56485	4.73E-01;4.30E-01;3.78E-01;5.48E-01
PDK4	0.476383	1.09934	4	GTAGTCCCTACAATGGCACA;ACATGAACCGTATTTCTACT;TATTTACTAATTGGGTCGGG;CATACACGATGTGAATTGGT	-0.23;-0.09;0.57;1.65	44424;48453;65104;75661	7.50E-01;4.83E-01;4.22E-01;4.04E-02	1781;12338;28989;33018	1.07E+00;9.68E-01;8.82E-01;1.48E+00
LNPEP	-0.2567	0.659894	5	GGAATCTCACTCTGTCACCC;AGGATAGTGGAATATGCCAC;GCCTGAGCTTCTATTCATGA;TTCATAGCGTAGTGGCACAA;GGGTTTGCTCACCTTCCGAG	-1.53;-1.04;0.35;0.44;0.49	17134;24568;60539;62438;63601	3.91E-01;4.94E-01;6.43E-01;3.88E-01;4.28E-01	13841;15004;16903;52874;60308	3.91E-01;7.06E-01;1.20E+00;4.63E-01;5.43E-01
ALPI	-1.44279	0.809408	4	CAACACGACACGCGGCAATG;CCGTTCGCAGACATACAATG;GATCCACCGAGACCCCACAC;CATGATGACCATGGTCGATG	-3.83;-1.89;-0.39;0.33	984;13517;39920;59891	1.31E+00;9.05E-01;5.76E-01;4.46E-01	17551;37522;63925;76458	3.77E-01;4.27E-01;4.06E-01;2.22E-02
SEC61A1	-2.2668	1.61163	4	AAGGCACATTGATGGAGCTA;TCATCACATACACGATAGAC;GCTGAATGCCTTCCATACGA;GAAGATAAAGAGGGTGATAG	-2.85;-2.71;-1.86;-1.65	6393;7401;13707;15759	5.93E-01;1.35E+00;1.74E+00;2.77E+00	61683;63728;70042;71049	1.57E+00;8.95E-01;5.49E-01;1.50E-01
SEC61A2	-0.641763	0.699835	8	GAGAATCGCTTGAATCCGGG;GCCGAGGCGGGCAGATCACG;CAAAGTCCGAGCTTTACGGG;CAAGGCAGGCAGATCACCTG;AAATCGAACAGACAGCATCT;AGTCCCACTACCATTAACAC;GTAGGAGGAAGAGGAAGAGG;CCCCGTCATGACATACACAA	-1.64;-1.31;-1.15;-0.53;-0.39;-0.38;-0.32;0.59	15856;20055;22556;35879;39655;40132;41832;65470	4.82E-01;5.07E-01;6.07E-01;5.73E-01;6.40E-01;9.00E-01;1.31E+00;5.83E-01	11972;35610;37310;37787;41563;54886;57387;61585	4.18E-01;8.32E-01;6.31E-01;5.64E-01;6.06E-01;5.21E-01;5.95E-01;7.96E-01
ALPL	-1.06868	0.879745	7	GGCATGGTTCACTCTCGTGG;TCGCCCAAGCTAGAGTGCAG;GATGACATTCTTAGCCACGT;CATTGGCCTTCACCCCACAC;CAAGGCAGGCAGATCACCTG;TCCTGCCTCAGCCTCCCGAG;AGCTCTTCCAGGTGTCAACG	-3.43;-1.41;-0.89;-0.65;-0.53;-0.4;-0.17	2514;18711;27434;32914;35879;39519;46075	7.29E-01;5.12E-01;5.68E-01;6.63E-01;8.89E-01;1.22E+00;1.58E+00	31367;37923;41563;44528;50008;58730;74928	9.01E-01;7.59E-01;6.03E-01;5.32E-01;5.29E-01;4.92E-01;1.00E-01
PECR	-0.870186	0.654391	6	ATGGAAATCCAGCTTTAGTA;GGAATCTCACTCTGTCACCC;ACAATGCAACATCCGGAATG;CAAGGCAGGCAGATCACCTG;GTAGAAGGTACCCGTCAGGT;AGAACTGATGTGTTCAGCAG	-2.14;-1.53;-1.14;-0.53;-0.01;0.13	11509;17134;22701;35879;50517;54833	3.99E-01;5.69E-01;7.50E-01;7.01E-01;6.08E-01;9.00E-01	22609;26925;41563;54741;60308;65933	5.06E-01;4.84E-01;5.12E-01;4.92E-01;4.20E-01;4.19E-01
LINC01090	-0.920635	0.542073	2	GCCGAGGCGGGCAGATCACG;CAAGGCAGGCAGATCACCTG	-1.31;-0.53	20055;35879	4.16E-01;6.68E-01	41563;57387	3.03E-01;2.60E-01
LINC01099	-1.30793	0.586748	1	GCCGAGGCGGGCAGATCACG	-1.31	20055	0.587	57387	0.13
LINC01098	-0.920635	0.542073	2	GCCGAGGCGGGCAGATCACG;CAAGGCAGGCAGATCACCTG	-1.31;-0.53	20055;35879	4.16E-01;6.68E-01	41563;57387	3.03E-01;2.60E-01
CTAGE11P	-1.11261	0.702482	5	TGTGCTTGAAGAAGACACAA;TCAACAAGATGAATTGATGG;GTTAGGAGTCGGCTTTATGT;CATTGGCAAGTGTCCAGTCA;TATTATTCAGTTATCTGAAG	-2.65;-1.5;-1.47;-0.52;0.58	7887;17420;17876;36188;65290	4.80E-01;6.28E-01;1.14E+00;8.96E-01;3.71E-01	12152;41254;59568;60022;69547	4.02E-01;5.38E-01;6.15E-01;3.92E-01;2.33E-01
DDIT3	-1.24501	0.733112	4	CTGGTATGAGGACCTGCAAG;TCAGCCAAGCCAGAGAAGCA;GACTGGAATCTGGAGAGTGA;ATTTCCAGGAGGTGAAACAT	-3.69;-0.93;-0.82;0.47	1356;26508;28914;63190	1.18E+00;5.17E-01;8.85E-01;3.53E-01	14252;48528;50934;76086	3.98E-01;4.84E-01;4.09E-01;3.07E-02
DDIT4	-0.227159	0.584317	4	CACACAAGTGTTCATCCTCA;CGGGCAACGACACCCCATCC;TGAGCGCGGCGGCCGATCTG;CTGGCCTACAGCGAGCCGTG	-0.9;-0.32;0.01;0.29	27301;41891;51573;59108	4.17E-01;4.32E-01;4.04E-01;4.69E-01	18334;25869;35551;50141	3.76E-01;5.27E-01;6.79E-01;7.55E-01
LOC101927118	-0.775756	0.694195	9	TCTTCAAAGCCACATCATCG;ACTGAGATTTCCTTCATACT;ACTGTGACCATCAGTACAGA;AATGAGATCTCCTTTAAGCT;TTATATGAAAGAAGTAGGTA;TTTGAGGAAATCACGCCAGG;AAATTCCGAAGACTACATGA;GACACCCCCATCTAAGGTTA;CATGATCATCAGTGTGAATG	-2.96;-1.38;-1.38;-1.21;-0.79;0.13;0.18;0.18;0.24	5471;19074;19088;21589;29732;54816;56178;56201;57740	4.51E-01;5.20E-01;6.38E-01;8.28E-01;8.20E-01;5.79E-01;5.42E-01;7.21E-01;1.15E+00	19702;21241;21264;22626;47711;55853;58354;58368;71979	6.60E-01;5.42E-01;5.96E-01;7.87E-01;6.14E-01;5.92E-01;5.20E-01;6.37E-01;2.86E-01
RIIAD1	-0.179876	0.583715	4	GCAGCTGCGAAAATTCAAGG;TTGCTAACGAAAAGTACCTA;GAAGTAGAGTGGCTCATAAG;GCGCTGCGCTAAGCGCCCCG	-1.2;-0.74;0.35;0.87	21750;30714;60366;70152	3.79E-01;4.64E-01;3.79E-01;1.72E-01	7290;17076;46728;55692	5.53E-01;7.51E-01;4.58E-01;5.73E-01
GOLGA8T	-1.22333	1.02625	10	GCTGCAATGAATGTTGCAGG;ATCTGAGAGAACGTTTCATG;CCAAGACTCACATCCCTAGG;CAGCCAAGACTCACATCCCT;GGATTCAGGAGCAGGAAGAG;CACCAGAAGTGGCTTTCTCA;ACTCCGTACGTGCTTTGCTG;GCAGCAAAGCACGTACGGAG;TCTCATTACAGAAAAGTCCA;GTTAGAGCAGTCCATGCGGG	-3.65;-2.04;-1.98;-1.68;-1.43;-0.78;-0.75;-0.1;0.0;0.18	1513;12236;12747;15433;18339;29744;30653;48176;51012;56222	7.86E-01;5.47E-01;8.18E-01;1.06E+00;1.31E+00;1.01E+00;1.39E+00;8.41E-01;1.10E+00;1.39E+00	21220;26208;29266;46789;47698;59103;62009;64695;65206;75929	8.14E-01;7.23E-01;6.32E-01;9.68E-01;7.29E-01;8.84E-01;6.98E-01;5.39E-01;4.74E-01;8.56E-02
OR5R1	-0.604192	0.518855	4	ATCAGTGTTGAATAATGCAG;TAAAAACACCCCAAAGCACG;AGGTGAGAAAACAACCCAGT;TAATAGCAGAGGAGTAACAA	-1.26;-0.88;-0.36;0.08	20729;27662;40678;53607	3.76E-01;5.00E-01;5.60E-01;6.39E-01	23835;36764;49780;56713	3.89E-01;4.28E-01;4.21E-01;5.41E-01
GOLGA8Q	-1.42697	1.14022	10	GCTGCAATGAATGTTGCAGG;GCAGCAAAGCACATACAGAG;TGAACATATAGAAGGAGAGA;GAAAGCCGAAAGGGAGCTAG;GATGAGTAAAATGTCGCAGG;GTTGGGTAGAGCAGCTGGAG;GAGGATGAGTAAAATGTCGC;GTGTAAAGGAGAGTTAGAGA;ATCTGAGAGAACGTTCCATG;CAGCAAAGCACATACAGAGT	-3.65;-3.43;-2.93;-1.94;-1.78;-1.46;-0.59;0.02;0.31;1.17	1513;2522;5730;13095;14501;18029;34554;51776;59422;73209	7.86E-01;1.44E+00;1.55E+00;1.25E+00;1.69E+00;1.94E+00;1.14E+00;7.05E-01;6.68E-01;2.44E-01	4233;18020;25666;42886;59414;62936;64341;71721;74918;75929	4.82E-01;5.33E-01;5.84E-01;8.07E-01;1.34E+00;1.13E+00;7.99E-01;8.77E-01;6.16E-01;8.56E-02
GOLGA8S	-1.5269	0.800986	2	GAAAGCCGAAAGGGAGCTAG;ACTGCAATGAATGTTGCAGA	-1.94;-1.12	13095;23101	5.51E-01;1.05E+00	54341;64341	3.78E-01;1.61E-01
GOLGA8R	-1.48318	1.32578	12	GCTGCAATGAATGTTGCAGG;GCAGCAAAGCACATACAGAG;TGAACATATAGAAGGAGAGA;CCTGAGACAGCCACTTCCGG;GAAAGCCGAAAGGGAGCTAG;GATGAGTAAAATGTCGCAGG;GTTGGGTAGAGCAGCTGGAG;CACCGGAAGTGGCTGTCTCA;GAGGATGAGTAAAATGTCGC;GTGTAAAGGAGAGTTAGAGA;ATCTGAGAGAACGTTCCATG;CAGCAAAGCACATACAGAGT	-3.65;-3.43;-2.93;-2.54;-1.94;-1.78;-1.46;-0.98;-0.59;0.02;0.31;1.17	1513;2522;5730;8640;13095;14501;18029;25535;34554;51776;59422;73209	7.24E-01;1.30E+00;1.35E+00;1.53E+00;1.52E+00;1.94E+00;2.11E+00;1.86E+00;1.58E+00;8.88E-01;8.19E-01;2.93E-01	4233;18020;25666;42886;51907;59414;62936;64341;68802;71721;74918;75929	4.52E-01;5.97E-01;6.70E-01;1.14E+00;1.34E+00;1.52E+00;1.37E+00;1.04E+00;9.77E-01;7.77E-01;5.66E-01;1.03E-01
GOLGA8M	-1.34781	0.943701	7	GCTGCAATGAATGTTGCAGG;TATGCGTCGGGTAGAGAAGC;ATCTGAGAGAACGTTTCATG;ACTCCGTACCTGCTTTACTG;CCTCAGACAGCCACTTCTGG;TCTCACTACAGAAAAGTCCA;GTTAGAGCAGTCCATGCGGG	-3.65;-2.06;-2.04;-0.98;-0.86;-0.02;0.18	1513;12067;12236;25547;28219;50422;56222	9.15E-01;6.60E-01;1.16E+00;9.04E-01;1.26E+00;7.30E-01;9.73E-01	21220;27020;49222;51895;65206;65378;75929	5.52E-01;5.24E-01;8.00E-01;5.96E-01;6.54E-01;4.04E-01;5.99E-02
GOLGA8O	-1.6359	1.42212	10	GCTGCAATGAATGTTGCAGG;GCAGCAAAGCACATACAGAG;TGAACATATAGAAGGAGAGA;CCTGAGACAGCCACTTCCGG;GAAAGCCGAAAGGGAGCTAG;GATGAGTAAAATGTCGCAGG;CACCGGAAGTGGCTGTCTCA;GAGGATGAGTAAAATGTCGC;ATCTGAGAGAACGTTCCATG;CAGCAAAGCACATACAGAGT	-3.65;-3.43;-2.93;-2.54;-1.94;-1.78;-0.98;-0.59;0.31;1.17	1513;2522;5730;8640;13095;14501;25535;34554;59422;73209	7.86E-01;1.44E+00;1.55E+00;1.80E+00;1.86E+00;2.40E+00;1.82E+00;1.66E+00;6.68E-01;2.44E-01	4233;18020;42886;51907;62936;64341;68802;71721;74918;75929	4.82E-01;5.33E-01;1.14E+00;1.26E+00;1.69E+00;1.25E+00;1.14E+00;8.77E-01;6.16E-01;8.56E-02
GOLGA8N	-1.38915	1.24435	11	GCAGCAAAGCACATACAGAG;TGAACATATAGAAGGAGAGA;CCTGAGACAGCCACTTCCGG;GAAAGCCGAAAGGGAGCTAG;GATGAGTAAAATGTCGCAGG;GTTGGGTAGAGCAGCTGGAG;ACTGCAATGAATGTTGCAGA;CACCGGAAGTGGCTGTCTCA;GAGGATGAGTAAAATGTCGC;ATCTGAGAGAACGTTCCATG;CAGCAAAGCACATACAGAGT	-3.43;-2.93;-2.54;-1.94;-1.78;-1.46;-1.12;-0.98;-0.59;0.31;1.17	2522;5730;8640;13095;14501;18029;23101;25535;34554;59422;73209	5.90E-01;8.22E-01;1.05E+00;1.13E+00;1.51E+00;1.71E+00;1.77E+00;2.16E+00;1.93E+00;7.42E-01;2.68E-01	4233;18020;42886;51907;54341;59414;62936;64341;68802;71721;74918	4.65E-01;5.61E-01;1.36E+00;1.55E+00;1.26E+00;1.19E+00;1.02E+00;7.41E-01;6.27E-01;4.23E-01;1.58E-01
GOLGA8H	-1.18218	0.914091	9	GCTGCAATGAATGTTGCAGG;TATGCGTCGGGTAGAGAAGC;ATCTGAGAGAACGTTTCATG;GGATTCAGGAGCAGGAAGAG;CACCAGAAGTGGCTTTCTCA;ACTCCGTACGTGCTTTGCTG;GCAGCAAAGCACGTACGGAG;TCTCATTACAGAAAAGTCCA;GTTAGAGCAGTCCATGCGGG	-3.65;-2.06;-2.04;-1.43;-0.78;-0.75;-0.1;0.0;0.18	1513;12067;12236;18339;29744;30653;48176;51012;56222	8.23E-01;5.73E-01;9.28E-01;9.89E-01;8.19E-01;1.15E+00;7.32E-01;9.63E-01;1.25E+00	21220;26208;29266;46789;47698;59103;65206;65378;75929	7.21E-01;6.41E-01;5.80E-01;7.87E-01;6.14E-01;6.57E-01;5.69E-01;4.42E-01;7.71E-02
GOLGA8K	-1.30968	1.28435	12	GCTGCAATGAATGTTGCAGG;TATGCGTCGGGTAGAGAAGC;ATCTGAGAGAACGTTTCATG;CCAAGACTCACATCCCTAGG;CAGCCAAGACTCACATCCCT;GGATTCAGGAGCAGGAAGAG;CCCTCAGGAGCACCTGGAAG;CACCAGAAGTGGCTTTCTCA;ACTCCGTACGTGCTTTGCTG;GCAGCAAAGCACGTACGGAG;TCTCATTACAGAAAAGTCCA;GTTAGAGCAGTCCATGCGGG	-3.65;-2.06;-2.04;-1.98;-1.68;-1.43;-1.42;-0.78;-0.75;-0.1;0.0;0.18	1513;12067;12236;12747;15433;18339;18552;29744;30653;48176;51012;56222	7.24E-01;5.31E-01;7.34E-01;1.06E+00;1.28E+00;1.49E+00;2.04E+00;1.47E+00;1.94E+00;1.09E+00;1.38E+00;1.67E+00	21220;26208;29266;46789;47698;58890;59103;62009;64695;65206;65378;75929	1.01E+00;9.16E-01;7.81E-01;1.40E+00;1.06E+00;1.47E+00;1.05E+00;8.80E-01;7.11E-01;5.30E-01;5.37E-01;1.03E-01
GOLGA8J	-1.37016	1.24305	11	GCTGCAATGAATGTTGCAGG;ACAGAGCGTCTTCAAGGAGC;TATGCGTCGGGTAGAGAAGC;ATCTGAGAGAACGTTTCATG;CCAAGACTCACATCCCTAGG;CAGCCAAGACTCACATCCCT;CACCAGAAGTGGCTTTCTCA;ACTCCGTACGTGCTTTGCTG;GCAGCAAAGCACGTACGGAG;TCTCATTACAGAAAAGTCCA;GTTAGAGCAGTCCATGCGGG	-3.65;-2.21;-2.06;-2.04;-1.98;-1.68;-0.78;-0.75;-0.1;0.0;0.18	1513;10981;12067;12236;12747;15433;29744;30653;48176;51012;56222	7.53E-01;5.54E-01;7.93E-01;1.21E+00;1.72E+00;2.02E+00;1.23E+00;1.66E+00;9.60E-01;1.24E+00;1.53E+00	21220;26208;29266;46789;47698;62009;64695;65206;65378;66460;75929	9.12E-01;8.16E-01;7.00E-01;1.17E+00;8.81E-01;1.42E+00;1.16E+00;7.84E-01;5.36E-01;4.71E-01;9.42E-02
GOLGA8G	-1.5269	0.800986	2	GAAAGCCGAAAGGGAGCTAG;ACTGCAATGAATGTTGCAGA	-1.94;-1.12	13095;23101	5.51E-01;1.05E+00	54341;64341	3.78E-01;1.61E-01
GOLGA8F	-1.5269	0.800986	2	GAAAGCCGAAAGGGAGCTAG;ACTGCAATGAATGTTGCAGA	-1.94;-1.12	13095;23101	5.51E-01;1.05E+00	54341;64341	3.78E-01;1.61E-01
GOLGA8A	-1.69867	1.4532	9	GACTCACAGCCTCAGATGAG;TGAACCGTGGGCAAAAGGAG;AAGCAGCAGTCCTGAACTCG;CGGGAGCAGATACTGCTGAA;GCAGGTTTGCACATTGAAGG;TGCATCAGTCTCCTGAACCG;CAAGGCAGGCAGATCACCTG;AGAAGAAGCATGATACGCAT;AAGGACACGTGACACAGGTG	-3.79;-3.36;-2.67;-1.98;-1.37;-1.06;-0.53;-0.53;0.01	1078;2917;7661;12676;19242;24027;35879;36049;51433	9.51E-01;1.41E+00;1.36E+00;1.43E+00;1.42E+00;1.61E+00;1.32E+00;1.97E+00;1.60E+00	26010;41393;41563;53415;58200;64766;69781;74528;76364	9.42E-01;1.31E+00;8.91E-01;1.09E+00;9.39E-01;9.00E-01;7.70E-01;6.04E-01;5.47E-02
GOLGA8B	-1.69867	1.4532	9	GACTCACAGCCTCAGATGAG;TGAACCGTGGGCAAAAGGAG;AAGCAGCAGTCCTGAACTCG;CGGGAGCAGATACTGCTGAA;GCAGGTTTGCACATTGAAGG;TGCATCAGTCTCCTGAACCG;CAAGGCAGGCAGATCACCTG;AGAAGAAGCATGATACGCAT;AAGGACACGTGACACAGGTG	-3.79;-3.36;-2.67;-1.98;-1.37;-1.06;-0.53;-0.53;0.01	1078;2917;7661;12676;19242;24027;35879;36049;51433	9.51E-01;1.41E+00;1.36E+00;1.43E+00;1.42E+00;1.61E+00;1.32E+00;1.97E+00;1.60E+00	26010;41393;41563;53415;58200;64766;69781;74528;76364	9.42E-01;1.31E+00;8.91E-01;1.09E+00;9.39E-01;9.00E-01;7.70E-01;6.04E-01;5.47E-02
CT45A9	0.04791	1.49172	18	CTGGTAACGTTTCCTCCCAC;TATAAAACGTCAATTAGTGA;TATCAGCATTAATTTCTTGT;GTATCAGAAAAGGCAGAGGA;AGGCTGTTTCTCTGCATTCT;GTCATCTCCAGAGAAACTGC;ATTAATTTCTTGTTGGCTTT;CCTTGCTGCTTCCTTGATGA;TGCTATTCCACCCAGCCAAT;CTTCGTATCAGAAAAGGCAG;GCATGTCCTGTCATAAGCTC;TCCTTGTTTCCTTGCCAACA;GTTTCACCAGAGCTTATGAC;GATAGGATGATGCAGAAACC;AAAATCTTCGAAATGCTTGA;CATCAAGGAAGCAGCAAGGT;CGAAGGACTGTCACATTCCC;AGAGGATGGCCCTGTTGGCA	-2.48;-1.91;-1.27;-0.61;-0.58;-0.29;-0.11;-0.11;-0.04;0.35;0.51;0.53;0.66;0.66;0.75;1.48;1.56;1.78	9072;13347;20603;33832;34578;42509;47674;47905;49789;60413;63922;64363;66750;66751;68260;75028;75325;75998	5.96E-01;6.57E-01;8.28E-01;1.44E+00;1.16E+00;1.44E+00;1.54E+00;1.21E+00;1.06E+00;1.70E+00;1.72E+00;1.33E+00;1.21E+00;8.57E-01;6.89E-01;1.05E+00;5.13E-01;1.47E-01	1444;2117;2414;9182;10691;10692;13079;13520;17029;27653;29537;29768;34933;42864;43610;56839;64095;68370	6.13E-01;1.13E+00;1.81E+00;9.86E-01;1.21E+00;1.67E+00;1.79E+00;2.26E+00;2.20E+00;1.37E+00;1.56E+00;1.98E+00;1.86E+00;1.51E+00;1.91E+00;1.11E+00;9.05E-01;9.74E-01
CT45A8	0.04791	1.49172	18	CTGGTAACGTTTCCTCCCAC;TATAAAACGTCAATTAGTGA;TATCAGCATTAATTTCTTGT;GTATCAGAAAAGGCAGAGGA;AGGCTGTTTCTCTGCATTCT;GTCATCTCCAGAGAAACTGC;ATTAATTTCTTGTTGGCTTT;CCTTGCTGCTTCCTTGATGA;TGCTATTCCACCCAGCCAAT;CTTCGTATCAGAAAAGGCAG;GCATGTCCTGTCATAAGCTC;TCCTTGTTTCCTTGCCAACA;GTTTCACCAGAGCTTATGAC;GATAGGATGATGCAGAAACC;AAAATCTTCGAAATGCTTGA;CATCAAGGAAGCAGCAAGGT;CGAAGGACTGTCACATTCCC;AGAGGATGGCCCTGTTGGCA	-2.48;-1.91;-1.27;-0.61;-0.58;-0.29;-0.11;-0.11;-0.04;0.35;0.51;0.53;0.66;0.66;0.75;1.48;1.56;1.78	9072;13347;20603;33832;34578;42509;47674;47905;49789;60413;63922;64363;66750;66751;68260;75028;75325;75998	5.96E-01;6.57E-01;8.28E-01;1.44E+00;1.16E+00;1.44E+00;1.54E+00;1.21E+00;1.06E+00;1.70E+00;1.72E+00;1.33E+00;1.21E+00;8.57E-01;6.89E-01;1.05E+00;5.13E-01;1.47E-01	1444;2117;2414;9182;10691;10692;13079;13520;17029;27653;29537;29768;34933;42864;43610;56839;64095;68370	6.13E-01;1.13E+00;1.81E+00;9.86E-01;1.21E+00;1.67E+00;1.79E+00;2.26E+00;2.20E+00;1.37E+00;1.56E+00;1.98E+00;1.86E+00;1.51E+00;1.91E+00;1.11E+00;9.05E-01;9.74E-01
LOC105373734	-1.52854	0.655112	1	GGAATCTCACTCTGTCACCC	-1.53	17134	0.655	60308	0.109
LOC105373730	-1.52854	0.655112	1	GGAATCTCACTCTGTCACCC	-1.53	17134	0.655	60308	0.109
CT45A1	0.161543	2.04824	19	ATTAATTTCTCGTTGGCTTT;CTGGTAACGTTTCCTCCCAC;GTATCAGAAAAGGCAGAGGA;AGGCTGTTTCTCTGCATTCT;GTCATCTCCAGAGAAACTGC;CCTTGCTGCTTCCTTGATGA;TGCTATTCCACCCAGCCAAT;GGCTTACTTACTCTTTGCTT;CTTCGTATCAGAAAAGGCAG;CTTACTCTTTGCTTTGGACA;GCATGTCCTGTCATAAGCTC;TCCTTGTTTCCTTGCCAACA;GTTTCACCAGAGCTTATGAC;GATAGGATGATGCAGAAACC;AAAATCTTCGAAATGCTTGA;TATCAGCATTAATTTCTCGT;CATCAAGGAAGCAGCAAGGT;CGAAGGACTGTCACATTCCC;AGAGGATGGCCCTGTTGGCA	-2.86;-2.48;-0.61;-0.58;-0.29;-0.11;-0.04;0.27;0.35;0.46;0.51;0.53;0.66;0.66;0.75;1.04;1.48;1.56;1.78	6310;9072;33832;34578;42509;47905;49789;58521;60413;63038;63922;64363;66750;66751;68260;72032;75028;75325;75998	4.75E-01;5.49E-01;2.08E+00;1.67E+00;2.08E+00;2.26E+00;2.01E+00;2.83E+00;2.58E+00;2.50E+00;2.10E+00;1.67E+00;1.57E+00;1.14E+00;9.38E-01;9.84E-01;1.01E+00;5.01E-01;1.55E-01	1444;2117;2414;5410;9182;10691;10692;13079;13520;14404;17029;18921;27653;29537;34933;42864;43610;68370;71140	5.98E-01;1.10E+00;1.75E+00;1.51E+00;1.33E+00;1.57E+00;2.09E+00;2.18E+00;2.69E+00;3.14E+00;3.22E+00;3.49E+00;2.53E+00;2.84E+00;2.64E+00;2.17E+00;2.73E+00;6.26E-01;7.00E-01
CT45A3	0.137248	1.84707	17	ATTAATTTCTCGTTGGCTTT;CTGGTAACGTTTCCTCCCAC;GTATCAGAAAAGGCAGAGGA;AGGCTGTTTCTCTGCATTCT;GTCATCTCCAGAGAAACTGC;CCTTGCTGCTTCCTTGATGA;TGCTATTCCACCCAGCCAAT;CTTCGTATCAGAAAAGGCAG;GCATGTCCTGTCATAAGCTC;TCCTTGTTTCCTTGCCAACA;GTTTCACCAGAGCTTATGAC;GATAGGATGATGCAGAAACC;AAAATCTTCGAAATGCTTGA;TATCAGCATTAATTTCTCGT;CATCAAGGAAGCAGCAAGGT;CGAAGGACTGTCACATTCCC;AGAGGATGGCCCTGTTGGCA	-2.86;-2.48;-0.61;-0.58;-0.29;-0.11;-0.04;0.35;0.51;0.53;0.66;0.66;0.75;1.04;1.48;1.56;1.78	6310;9072;33832;34578;42509;47905;49789;60413;63922;64363;66750;66751;68260;72032;75028;75325;75998	4.49E-01;5.41E-01;1.74E+00;1.36E+00;1.66E+00;1.76E+00;1.53E+00;2.40E+00;2.43E+00;1.92E+00;1.78E+00;1.28E+00;1.04E+00;1.08E+00;1.09E+00;5.25E-01;1.39E-01	1444;2117;2414;5410;9182;10691;10692;13079;13520;17029;27653;29537;34933;42864;43610;68370;71140	6.30E-01;1.17E+00;1.88E+00;1.66E+00;1.50E+00;1.78E+00;2.38E+00;2.52E+00;3.10E+00;3.04E+00;1.98E+00;2.27E+00;2.16E+00;1.81E+00;2.33E+00;5.67E-01;6.27E-01
CT45A2	0.04791	1.49172	18	CTGGTAACGTTTCCTCCCAC;TATAAAACGTCAATTAGTGA;TATCAGCATTAATTTCTTGT;GTATCAGAAAAGGCAGAGGA;AGGCTGTTTCTCTGCATTCT;GTCATCTCCAGAGAAACTGC;ATTAATTTCTTGTTGGCTTT;CCTTGCTGCTTCCTTGATGA;TGCTATTCCACCCAGCCAAT;CTTCGTATCAGAAAAGGCAG;GCATGTCCTGTCATAAGCTC;TCCTTGTTTCCTTGCCAACA;GTTTCACCAGAGCTTATGAC;GATAGGATGATGCAGAAACC;AAAATCTTCGAAATGCTTGA;CATCAAGGAAGCAGCAAGGT;CGAAGGACTGTCACATTCCC;AGAGGATGGCCCTGTTGGCA	-2.48;-1.91;-1.27;-0.61;-0.58;-0.29;-0.11;-0.11;-0.04;0.35;0.51;0.53;0.66;0.66;0.75;1.48;1.56;1.78	9072;13347;20603;33832;34578;42509;47674;47905;49789;60413;63922;64363;66750;66751;68260;75028;75325;75998	5.96E-01;6.57E-01;8.28E-01;1.44E+00;1.16E+00;1.44E+00;1.54E+00;1.21E+00;1.06E+00;1.70E+00;1.72E+00;1.33E+00;1.21E+00;8.57E-01;6.89E-01;1.05E+00;5.13E-01;1.47E-01	1444;2117;2414;9182;10691;10692;13079;13520;17029;27653;29537;29768;34933;42864;43610;56839;64095;68370	6.13E-01;1.13E+00;1.81E+00;9.86E-01;1.21E+00;1.67E+00;1.79E+00;2.26E+00;2.20E+00;1.37E+00;1.56E+00;1.98E+00;1.86E+00;1.51E+00;1.91E+00;1.11E+00;9.05E-01;9.74E-01
CT45A5	-0.0102257	1.5085	18	ATTAATTTCTCGTTGGCTTT;CTGGTAACGTTTCCTCCCAC;TTCACTGGTTTCAGCAAAGA;GTATCAGAAAAGGCAGAGGA;AGGCTGTTTCTCTGCATTCT;GTCATCTCCAGAGAAACTGC;CCTTGCTGCTTCCTTGATGA;TGCTATTCCACCCAGCCAAT;GATGGGATGATGCAGAAACC;CTTCGTATCAGAAAAGGCAG;GCATGTCCTGTCATAAGCTC;TCCTTGTTTCCTTGCCAACA;GTTTCACCAGAGCTTATGAC;AAAATCTTCGAAATGCTTGA;TATCAGCATTAATTTCTCGT;CATCAAGGAAGCAGCAAGGT;CGAAGGACTGTCACATTCCC;AGAGGATGGCCCTGTTGGCA	-2.86;-2.48;-1.94;-0.61;-0.58;-0.29;-0.11;-0.04;0.08;0.35;0.51;0.53;0.66;0.75;1.04;1.48;1.56;1.78	6310;9072;13110;33832;34578;42509;47905;49789;53426;60413;63922;64363;66750;68260;72032;75028;75325;75998	4.61E-01;5.44E-01;6.11E-01;1.44E+00;1.16E+00;1.44E+00;1.56E+00;1.37E+00;1.34E+00;1.70E+00;1.72E+00;1.33E+00;1.21E+00;9.86E-01;1.03E+00;1.05E+00;5.13E-01;1.47E-01	1444;2117;2414;5410;9182;10692;13079;13520;17029;24016;27653;29537;34933;42864;43610;64332;68370;71140	6.13E-01;1.13E+00;1.81E+00;1.58E+00;1.41E+00;1.67E+00;1.79E+00;2.26E+00;2.20E+00;1.73E+00;1.76E+00;2.01E+00;1.86E+00;1.51E+00;1.91E+00;6.47E-01;5.96E-01;6.64E-01
CT45A7	-0.0102257	1.5085	18	ATTAATTTCTCGTTGGCTTT;CTGGTAACGTTTCCTCCCAC;TTCACTGGTTTCAGCAAAGA;GTATCAGAAAAGGCAGAGGA;AGGCTGTTTCTCTGCATTCT;GTCATCTCCAGAGAAACTGC;CCTTGCTGCTTCCTTGATGA;TGCTATTCCACCCAGCCAAT;GATGGGATGATGCAGAAACC;CTTCGTATCAGAAAAGGCAG;GCATGTCCTGTCATAAGCTC;TCCTTGTTTCCTTGCCAACA;GTTTCACCAGAGCTTATGAC;AAAATCTTCGAAATGCTTGA;TATCAGCATTAATTTCTCGT;CATCAAGGAAGCAGCAAGGT;CGAAGGACTGTCACATTCCC;AGAGGATGGCCCTGTTGGCA	-2.86;-2.48;-1.94;-0.61;-0.58;-0.29;-0.11;-0.04;0.08;0.35;0.51;0.53;0.66;0.75;1.04;1.48;1.56;1.78	6310;9072;13110;33832;34578;42509;47905;49789;53426;60413;63922;64363;66750;68260;72032;75028;75325;75998	4.61E-01;5.44E-01;6.11E-01;1.44E+00;1.16E+00;1.44E+00;1.56E+00;1.37E+00;1.34E+00;1.70E+00;1.72E+00;1.33E+00;1.21E+00;9.86E-01;1.03E+00;1.05E+00;5.13E-01;1.47E-01	1444;2117;2414;5410;9182;10692;13079;13520;17029;24016;27653;29537;34933;42864;43610;64332;68370;71140	6.13E-01;1.13E+00;1.81E+00;1.58E+00;1.41E+00;1.67E+00;1.79E+00;2.26E+00;2.20E+00;1.73E+00;1.76E+00;2.01E+00;1.86E+00;1.51E+00;1.91E+00;6.47E-01;5.96E-01;6.64E-01
CT45A6	-0.0102257	1.5085	18	ATTAATTTCTCGTTGGCTTT;CTGGTAACGTTTCCTCCCAC;TTCACTGGTTTCAGCAAAGA;GTATCAGAAAAGGCAGAGGA;AGGCTGTTTCTCTGCATTCT;GTCATCTCCAGAGAAACTGC;CCTTGCTGCTTCCTTGATGA;TGCTATTCCACCCAGCCAAT;GATGGGATGATGCAGAAACC;CTTCGTATCAGAAAAGGCAG;GCATGTCCTGTCATAAGCTC;TCCTTGTTTCCTTGCCAACA;GTTTCACCAGAGCTTATGAC;AAAATCTTCGAAATGCTTGA;TATCAGCATTAATTTCTCGT;CATCAAGGAAGCAGCAAGGT;CGAAGGACTGTCACATTCCC;AGAGGATGGCCCTGTTGGCA	-2.86;-2.48;-1.94;-0.61;-0.58;-0.29;-0.11;-0.04;0.08;0.35;0.51;0.53;0.66;0.75;1.04;1.48;1.56;1.78	6310;9072;13110;33832;34578;42509;47905;49789;53426;60413;63922;64363;66750;68260;72032;75028;75325;75998	4.61E-01;5.44E-01;6.11E-01;1.44E+00;1.16E+00;1.44E+00;1.56E+00;1.37E+00;1.34E+00;1.70E+00;1.72E+00;1.33E+00;1.21E+00;9.86E-01;1.03E+00;1.05E+00;5.13E-01;1.47E-01	1444;2117;2414;5410;9182;10692;13079;13520;17029;24016;27653;29537;34933;42864;43610;64332;68370;71140	6.13E-01;1.13E+00;1.81E+00;1.58E+00;1.41E+00;1.67E+00;1.79E+00;2.26E+00;2.20E+00;1.73E+00;1.76E+00;2.01E+00;1.86E+00;1.51E+00;1.91E+00;6.47E-01;5.96E-01;6.64E-01
FTCDNL1	-0.964253	0.523508	2	GGAATCTCACTCTGTCACCC;TCCTGCCTCAGCCTCCCGAG	-1.53;-0.4	17134;39519	4.63E-01;5.84E-01	37923;60308	3.01E-01;2.17E-01
VMO1	0.34024	1.00328	4	GAGCCGCTGTGGTGTCGCGG;AGTGGCTTTCTCGCTTCGCG;CGTCCTAGGCAATACGCACG;GGTCATCGAAGTGACCAGCG	-0.41;0.24;0.26;1.27	39146;57747;58252;73909	6.12E-01;6.66E-01;3.75E-01;8.11E-02	3533;19190;19695;38296	8.00E-01;6.81E-01;1.31E+00;1.22E+00
ATP5C1	-1.11999	0.825031	4	TATTTCGAACTTGAATCCTG;ATGAAAAAGCTGATATCAAG;CAAGTCTATGAAAATGGTAG;ACCACACAGTCCTCGATCTG	-1.72;-1.27;-1.09;-0.39	15011;20567;23497;39752	3.91E-01;6.42E-01;1.11E+00;1.16E+00	37690;53945;56875;62431	5.80E-01;5.72E-01;3.76E-01;3.74E-01
LOC105371393	-1.30793	0.586748	1	GCCGAGGCGGGCAGATCACG	-1.31	20055	0.587	57387	0.13
TSPY18P	-1.65473	0.759507	2	CAGGATGGAGGCTGTACAGG;GACCCCAGAGTCTGCACTGG	-3.46;0.15	2372;55288	1.23E+00;2.93E-01	22154;75068	3.89E-01;2.70E-02
LOC105371399	-0.533336	0.334131	1	CAAGGCAGGCAGATCACCTG	-0.53	35879	0.334	41563	0.27
NPC2	-0.074123	0.711117	4	CCGGTGCAGTTCAAGGACTG;CAACCCTGCCAGCTGAGCAA;GAGCCTGATGGTTGTAAGAG;TATTCAGTCTAAAAGCAGCA	-1.81;-0.58;0.64;1.46	14147;34817;66365;74905	3.99E-01;4.35E-01;4.44E-01;5.78E-02	2537;11077;42625;63295	9.26E-01;1.05E+00;5.23E-01;3.50E-01
NPC1	-0.672185	0.552768	7	AAAGAGTTACAATACTACGT;ATTCCAGCTGGGAATTATCA;CTGTCTGACTCACTTAACAC;GAAGGTCTCACTAGGCATCG;CAAACTTGTATCATTCAGAG;ATATTCGATATCAAGTTACG;ACGCCATGTATGTCATCATG	-2.27;-1.61;-0.78;-0.49;-0.13;0.04;0.53	10541;16209;29817;37123;47144;52390;64428	4.02E-01;5.46E-01;5.44E-01;5.84E-01;5.71E-01;6.63E-01;5.59E-01	13014;25052;30298;40319;47625;61233;66898	4.09E-01;5.07E-01;5.41E-01;5.48E-01;5.62E-01;4.46E-01;4.45E-01
LINC00327	-1.30793	0.586748	1	GCCGAGGCGGGCAGATCACG	-1.31	20055	0.587	57387	0.13
C3orf58	0.237936	0.965612	4	GCAGACGCACGTCGCCGTTG;CAGTTCGTTGCGCTGCCAAG;AGTACACGTTCTTCACGTTG;TTTCCATTAATTGCCAAGCG	-0.1;0.03;0.11;0.91	48163;52006;54270;70608	8.71E-01;5.35E-01;3.85E-01;1.60E-01	6834;23172;25436;29279	5.73E-01;5.79E-01;1.02E+00;1.69E+00
RAB3GAP2	-1.20892	0.857841	6	AAATACTTCATACATTACAG;ATCACCATAAGATCATTGGT;GAGTAGGAGCTTTCAATGTG;CAAGGCAGGCAGATCACCTG;GAGGAATTGCAATACGCATG;TTATGTACGCTTCTACACTG	-3.69;-1.83;-0.73;-0.53;-0.31;-0.16	1360;14025;30927;35879;42058;46511	1.02E+00;6.55E-01;5.59E-01;7.01E-01;8.88E-01;1.33E+00	30931;35384;41563;46515;63417;76081	7.28E-01;5.65E-01;5.12E-01;5.07E-01;3.98E-01;4.62E-02
BHLHA15	-0.497054	0.504481	4	ACGGGTCCCTGCCGAACCCG;CGTGGGGGATGACTTCACGC;GGCGGCTGGAGAGCAACGAG;GCTGGATGCTGCTGTCACGA	-0.96;-0.91;-0.72;0.6	26093;27004;31242;65679	4.06E-01;5.09E-01;8.05E-01;2.86E-01	11763;46200;50438;51349	4.31E-01;4.59E-01;4.14E-01;7.14E-01
RAB3GAP1	-0.659332	0.474311	5	TGTCACTAATATATATCCAG;ATGGCAAATTTAAGGCCGGA;CAAGGCAGGCAGATCACCTG;TCGAAATCAGTTCGTACACC;CGAACTCTAACAGACCAATG	-2.56;-0.92;-0.53;0.32;0.4	8519;26910;35879;59681;61538	4.62E-01;4.74E-01;5.43E-01;3.93E-01;4.99E-01	15904;17761;41563;50532;68931	3.88E-01;6.18E-01;4.79E-01;5.02E-01;2.53E-01
C3orf52	-1.14728	0.8631	9	TGATCACTGTAATGACACCT;TGTTGACCAGACCTACTCAG;AGAACACTCAAGAGATGCCT;TGGAGCTCTCGGTGCTCGAG;CAAGGCAGGCAGATCACCTG;TCTGCCTTTCTAGGCTAACA;GGGATCACCATATCGCTGAA;ATCATCGGGTTCTCTGTACA;GAGCTCCTGTAATAAGAATG	-4.27;-2.59;-1.92;-1.25;-0.53;-0.13;-0.07;0.05;0.39	236;8323;13252;20825;35879;47138;48879;52730;61305	1.57E+00;7.27E-01;8.65E-01;8.61E-01;6.51E-01;5.92E-01;7.09E-01;8.77E-01;9.13E-01	16137;24712;28563;30304;41563;56617;64190;69119;77207	5.39E-01;6.04E-01;5.74E-01;6.08E-01;5.87E-01;6.03E-01;5.48E-01;4.09E-01;1.18E-02
C3orf56	-0.634083	0.513164	4	GATACGGACTTCCTATGAGG;AGGAGTAGATGACAGGCCAG;CTGCCTTGGTGCCTTCAGTG;AGGTGGGTGGGAATTTCATG	-3.27;-0.82;-0.08;1.64	3394;28890;48687;75609	8.15E-01;4.84E-01;4.33E-01;4.16E-02	1833;28755;48552;74051	1.05E+00;4.85E-01;4.34E-01;7.78E-02
DAG1	-0.737207	0.655672	8	ACGGTCACCATCCGGACTCG;GAGAATCGCTTGAATCCGGG;TCGCCCAAGCTAGAGTGCAG;GCCGAGGCGGGCAGATCACG;CAAGGCAGGCAGATCACCTG;CAGATGATACCACCTCACCA;GTGGTGCGAATACGAGTAGG;TCTTCTAGGTATCAGCGGCA	-1.74;-1.64;-1.41;-1.31;-0.53;-0.07;0.11;0.69	14824;15856;18711;20055;35879;49000;54382;67349	4.61E-01;5.27E-01;7.03E-01;1.02E+00;7.33E-01;6.16E-01;6.98E-01;4.85E-01	10093;23060;28442;41563;57387;58730;61585;62618	4.06E-01;5.26E-01;5.51E-01;5.73E-01;6.63E-01;5.07E-01;4.82E-01;7.38E-01
ETHE1	-1.12629	0.781353	6	CCCACACCCACGGATCAACA;AGTGAATACCCACTGCCACG;GGAATCTCACTCTGTCACCC;TCGCCCAAGCTAGAGTGCAG;CCAGGCTGACTTACACATTG;CAGGACTGGGTCGATCAGAA	-3.08;-1.54;-1.53;-1.41;-0.26;1.06	4654;17055;17134;18711;43382;72229	5.78E-01;5.70E-01;9.90E-01;1.53E+00;8.37E-01;1.82E-01	5213;34060;58730;60308;60387;72788	5.45E-01;5.44E-01;9.10E-01;5.69E-01;4.19E-01;1.61E-01
SGSM3	-1.19217	0.827417	5	CACACTGCACTGGTTCCTCA;GGCTGCCTGACAGATCGAGA;GCCGAGGCGGGCAGATCACG;AGACCCCAAAAACTGCAGCG;GTTCACCCATAACCACGATG	-2.53;-1.46;-1.31;-0.37;-0.29	8687;17974;20055;40363;42693	4.58E-01;6.13E-01;1.02E+00;7.53E-01;1.29E+00	34749;37079;57387;59468;68755	6.84E-01;4.89E-01;5.64E-01;3.94E-01;2.58E-01
KDM1A	0.778223	1.63578	4	TTTCTGAAACAGGATCGTGT;TGGAATAGCAGAGACTCCGG;CTAAATAACTGTGAACTCGG;TGAGAAGTCATCCGGTCATG	0.2;0.61;0.93;1.37	56786;65919;70782;74480	1.25E+00;1.02E+00;5.81E-01;6.77E-02	2962;6660;11523;20656	8.66E-01;1.43E+00;1.95E+00;2.30E+00
KDM1B	-0.0344442	0.748715	5	TCGCCCAAGCTAGAGTGCAG;CAACACTGGAGTTCTCAGCG;ATTCCTCACATCATCGTCCG;GGAGAGATGATACCATCGGG;ATAGCCAAGACTTATCGATG	-1.41;-0.69;0.35;0.44;1.14	18711;31904;60368;62577;72888	3.98E-01;4.62E-01;6.38E-01;3.88E-01;1.32E-01	4554;14865;17074;45538;58730	6.37E-01;7.11E-01;1.19E+00;6.09E-01;6.01E-01
LOC105369468	-0.533336	0.334131	1	CAAGGCAGGCAGATCACCTG	-0.53	35879	0.334	41563	0.27
LOC105369469	-0.533336	0.334131	1	CAAGGCAGGCAGATCACCTG	-0.53	35879	0.334	41563	0.27
SLC36A2	-0.72301	0.452509	4	GTAGAGTCGCGAGTCCATGG;CCCCTCGCTGTGAAGAACGC;CAAGCCCTTTATGGACTATG;ATCGTCACTTCCCTATACAT	-2.37;-0.73;-0.18;0.38	9826;31091;45810;61247	4.71E-01;4.60E-01;4.71E-01;4.08E-01	16195;31632;46351;67616	3.83E-01;4.56E-01;4.63E-01;2.36E-01
OR1S1	-0.557537	0.526336	4	CGTTCCCAATCACAGTGACC;CAGCAAAGGATAGATTGGCA;GAATTGTATAATTCAGAGGG;TCAGAGCAATAATATTACTG	-1.34;-0.57;-0.26;-0.06	19650;34888;43526;49179	3.75E-01;4.35E-01;5.07E-01;7.89E-01	28263;33916;42554;57792	4.27E-01;4.39E-01;5.24E-01;5.08E-01
OR1S2	-1.02696	0.716691	5	AGCTCTCATAAGAGATGGAT;TCAGGAAAAGCACAAAGAGG;TGAACTATACAACTTTCATG;TCAGAGCAATAATATTACTG;CAGCAAAGGATAGGTAGGCA	-4.19;-1.57;-0.13;-0.06;0.82	312;16606;47307;49179;69362	1.70E+00;6.52E-01;4.62E-01;5.28E-01;2.39E-01	8080;28263;30135;60835;77130	4.74E-01;4.67E-01;6.58E-01;3.89E-01;8.74E-03
HIST1H3H	-0.0536418	0.674262	4	ATGGGGCTTCTTGACACCGC;GGAGCTCTGGAAGCGCAAGT;TCTGGTAGCGGCGAATCTCG;AAGCCCCATCGCTATCGGCC	-0.75;-0.68;0.45;0.76	30623;32163;62784;68460	4.57E-01;4.51E-01;3.94E-01;2.14E-01	8982;14658;45279;46819	4.94E-01;8.50E-01;4.79E-01;8.74E-01
FCER1G	0.278917	0.901634	4	ATTCCAGATCCAAGTGCGAA;TACCTGCTTGTTCAACCAAA;CCTCCTCTACTGTCGACTGA;TCCAGGATATAGCAGAGCTG	-0.48;-0.47;0.45;1.61	37319;37502;62842;75521	5.72E-01;4.27E-01;3.95E-01;4.36E-02	1921;14600;39940;40123	1.04E+00;8.53E-01;5.76E-01;1.14E+00
BTG4	0.232833	0.924518	4	TTGAAACATACAGAAGTCAC;ACATACTAGCTCTCACCTGA;ATCCCTTTGAAGTATGCTGT;GTCTGATGAGGCTCTACTAA	-1.21;0.22;0.64;1.28	21554;57126;66446;73984	3.78E-01;6.48E-01;4.45E-01;7.93E-02	3458;10996;20316;55888	8.08E-01;1.05E+00;1.27E+00;5.67E-01
BTG3	-0.0277124	0.798195	4	ACCGACAGCACACCTCACAT;GGATCCTGAATGATAATCAG;AATGGAAGTGAAACCCAGTT;TATCCAGAAAAACCATCGAA	-0.2;-0.16;-0.07;0.33	45144;46318;48831;59896	7.72E-01;4.60E-01;4.31E-01;4.46E-01	17546;28611;31124;32298	3.77E-01;4.87E-01;8.09E-01;1.52E+00
BTG2	-1.33516	0.732127	4	GAGGCTTAAGGTCTTCAGCG;CTCATAGGGGTCCACCCACA;TTTCCCGAAAAGCCGTCCAA;GAAGGGAACCGACATGCTCC	-3.15;-1.6;-0.92;0.33	4150;16364;26776;59982	7.41E-01;7.78E-01;9.66E-01;4.44E-01	17460;50666;61077;73292	3.78E-01;5.13E-01;3.82E-01;9.57E-02
BTG1	-1.09075	0.680062	4	GATCTCGCCTATCATGGTGG;TTCTGTAGGACACTTCATAG;AATGGATCCTCTGATTGGAC;CTCCAAGTTTCTCCGCACCA	-3.9;-1.52;-0.25;1.31	804;17220;43776;74130	1.40E+00;7.46E-01;5.03E-01;7.59E-02	3312;33666;60222;76639	8.24E-01;4.41E-01;3.79E-01;1.81E-02
LOC102723341	-0.533336	0.334131	1	CAAGGCAGGCAGATCACCTG	-0.53	35879	0.334	41563	0.27
LOC105370041	0.214406	0.579809	1	TCATAAGCAGGAGAAACACC	0.21	57064	0.133	20378	0.58
SRD5A3	0.00100183	0.753879	5	CACGACGTGAATCATGACAT;TCCTGCCTCAGCCTCCCGAG;TCAGCACAGTTAGGCCAACA;TTTGCTCAGAATTCTCGGGG;GAGCCTTTGATGTCCCCAAG	-1.3;-0.4;-0.25;0.75;1.21	20204;39519;43680;68283;73467	4.10E-01;5.15E-01;4.67E-01;4.47E-01;1.14E-01	3975;9159;33762;37923;57238	6.82E-01;1.02E+00;5.79E-01;8.33E-01;6.56E-01
SRD5A2	0.389389	1.07682	4	CCAGCTATACTCATTCTCAG;CCCAGAAGTACCGTCCCAGG;GTGCTGAATACCCTGATGGG;GGAGGGCTTCGCGACGTACA	-0.61;0.2;0.89;1.07	33900;56770;70378;72350	5.07E-01;6.39E-01;5.63E-01;1.18E-01	5092;7064;20672;43542	6.69E-01;1.38E+00;1.25E+00;1.00E+00
SRD5A1	-0.225298	0.612887	5	GGAATCTCACTCTGTCACCC;GACGTTACCGATGCCCGTAG;GCCATTGTACACGCCAACAG;CACTCACCTATTAGAAAACG;CGTCAGACGAACTCAGTGTA	-1.53;-1.16;-0.25;0.49;1.32	17134;22400;43701;63643;74216	3.91E-01;5.22E-01;4.67E-01;3.91E-01;9.24E-02	3226;13799;33741;55042;60308	7.55E-01;7.54E-01;5.79E-01;4.33E-01;5.43E-01
ARMT1	-0.365149	0.526054	4	CAACAAATTTCTCAACCAAG;AATACCACAGATCTTAACTA;ACATCAAAGTAATCGATTGG;AAAGTGATGGAAAATCAAGA	-0.81;-0.72;-0.28;0.35	29275;31129;42985;60399	4.39E-01;4.60E-01;5.17E-01;4.32E-01	17043;34457;46313;48167	3.79E-01;4.37E-01;4.64E-01;8.25E-01
GGA1	-0.186467	0.864178	4	CCGACTGGCGAGTGACACAG;GAAGAGGGTGAATGCCATCG;ATCACATTCTTCGGCCGTGG;GGAACTTGCCCACTTCGTCG	-2.96;0.4;0.61;1.2	5531;61546;65887;73427	6.41E-01;7.97E-01;4.35E-01;9.25E-02	4015;11555;15896;71911	7.53E-01;1.01E+00;1.56E+00;1.29E-01
GGA3	-0.696011	0.438747	4	GGAGATTTCATAACGAAGTG;AGGCACGCTCATCGACCTTG;TTTGTAAGAGTTGATGACCC;TCCTATCCACAGGAATTGGT	-2.37;-0.67;-0.31;0.56	9853;32324;42116;65085	4.71E-01;4.50E-01;5.32E-01;3.02E-01	12357;35326;45118;67577	4.21E-01;4.33E-01;4.81E-01;2.37E-01
GGA2	-0.848972	0.50269	4	TCTTTCAGGTCGTGTATGAG;TCTAAAGAGCAACCACCCCG;AGCCACAGACCCAAGCATGT;AGATGTGCATGAACCACTGT	-2.59;-1.39;0.24;0.35	8295;18923;57676;60427	5.16E-01;6.89E-01;3.75E-01;4.31E-01	17015;19766;58519;69144	3.79E-01;6.64E-01;3.75E-01;1.97E-01
LOC101929727	-1.30793	0.586748	1	GCCGAGGCGGGCAGATCACG	-1.31	20055	0.587	57387	0.13
FHOD1	-1.20982	0.825326	5	TTCACTGCACGGATGAACAG;GCTGAATGTAGAGTCTGTGG;CAAGGCAGGCAGATCACCTG;CTGGGTCCGAAGGATCAGCG;CTTTGGCACGAGACTCAAAG	-3.61;-1.23;-0.53;-0.44;-0.24	1655;21231;35879;38528;44138	1.01E+00;5.41E-01;5.43E-01;8.13E-01;1.22E+00	33304;38914;41563;56211;75782	6.44E-01;5.07E-01;4.79E-01;4.20E-01;4.70E-02
FHOD3	-0.51006	0.618358	8	GGAATCTCACTCTGTCACCC;TCGCCCAAGCTAGAGTGCAG;GTCGGCTGTTTGGACAATCG;CAAGGCAGGCAGATCACCTG;TCCTGCCTCAGCCTCCCGAG;GTGACAGCCTGAATTAGGAG;GAAAAACTATACAACTCCAG;ACAGGAATTCTCTGCAGCGT	-1.53;-1.41;-0.94;-0.53;-0.4;-0.33;-0.11;1.17	17134;18711;26409;35879;39519;41400;47831;73181	5.12E-01;5.07E-01;5.59E-01;5.73E-01;6.43E-01;8.49E-01;9.79E-01;1.97E-01	4261;29611;36042;37923;41563;51033;58730;60308	5.28E-01;6.43E-01;6.08E-01;5.64E-01;6.06E-01;5.74E-01;5.55E-01;8.69E-01
GJC2	-1.71107	1.21217	4	GAGCCACACCTTGCCCACGA;GAGGCGTGCACTAAGGCGGT;GTAGCCCAGGTACATGACCG;GTCGCGCCCTACTGAAAAGA	-2.3;-1.93;-1.64;-0.96	10311;13132;15838;25953	4.60E-01;9.25E-01;1.57E+00;1.90E+00	51489;61604;64309;67131	1.00E+00;7.99E-01;4.11E-01;2.48E-01
GJC3	-1.12059	0.676295	4	GATTGCAGGTTATACTACCA;CAGGTGGTACTGCAACCCCA;AAACCCATATAGAGGGCGCT;GGGCAACACAGATGTCCCAG	-3.3;-0.79;-0.22;-0.17	3224;29701;44561;45948	8.34E-01;4.74E-01;4.90E-01;9.07E-01	31494;32881;47741;74218	4.69E-01;4.46E-01;4.44E-01;7.38E-02
GJC1	-0.418753	0.473921	4	TGCTGCACACATAAAACGGG;CATCTTCCCGAATCCGTCGT;AATGCGCTGGAAACAACACC;GAACACCCAGAAGCGTACAT	-1.71;-0.67;-0.24;0.94	15184;32397;44034;71014	3.90E-01;4.49E-01;4.99E-01;1.51E-01	6428;33408;45045;62258	5.92E-01;4.42E-01;4.82E-01;3.79E-01
PSMB9	-0.542861	0.54616	4	GTAGATGCGCTCGTGCAGCG;TATCAGCTATAAATATCGAG;TCCCAGGGTTCCATATACCT;CCAGACCCATTACCCCGGTG	-2.93;-0.58;0.65;0.68	5728;34842;66688;67197	6.29E-01;4.35E-01;4.50E-01;2.46E-01	10245;10754;42600;71719	4.61E-01;1.07E+00;5.24E-01;1.33E-01
PSMB8	-1.88604	1.22904	4	CCAGAGCTCGCTTTACCCCG;ACTAATGTAGGACCCAGCTG;AAGGAACGTTCAGATTGAGA;TGGAGAACGTATTTCAGTGT	-3.59;-1.95;-1.14;-0.86	1746;13016;22664;28091	1.07E+00;9.31E-01;1.15E+00;1.76E+00	49351;54778;64426;75696	9.15E-01;5.90E-01;4.12E-01;3.96E-02
PSMB7	-0.531564	0.503787	4	AACTGGCACGACCATCGCTG;GCAGATACAAGAGCAACTGA;GAAAACGTTACACTCACCCA;ACCAGGTATCAAGGTTACAT	-2.67;-0.09;-0.05;0.68	7734;48253;49523;67192	5.36E-01;4.80E-01;4.24E-01;2.47E-01	10250;27919;29189;69698	4.61E-01;4.96E-01;8.75E-01;1.83E-01
PSMB6	-1.16535	0.834393	4	CCTACCAGCTCGGTTTCCAC;GGAGATGTGTTACCGATACC;AAAGCCGAGAAGTTTCCACT;AGTCACTCGATTGGCGATGT	-2.2;-0.98;-0.87;-0.62	11052;25647;28045;33692	4.44E-01;5.31E-01;9.17E-01;1.45E+00	43750;49397;51795;66393	7.30E-01;4.95E-01;4.02E-01;2.67E-01
PSMB5	-2.55012	1.79468	4	TTTGTACTGATACACCATGT;GCTTCATGGAACAACCACCC;ATCTGTGGCTGGGATAAGAG;CCGCTACCGGTGAACCAGCG	-3.56;-3.13;-2.2;-1.3	1879;4284;11003;20123	1.04E+00;1.79E+00;2.01E+00;2.34E+00	57319;66447;73151;75565	1.28E+00;1.05E+00;7.29E-01;4.26E-02
PSMB4	-2.15033	1.51949	4	CGCCCTCGAACTTAACGCCG;GAAATCAGCGTAGTCGCCAG;GAAACGAGCCAAGGAGCCGT;AGCATAGCCTCCGATGACCA	-2.85;-2.44;-1.75;-1.57	6374;9355;14779;16691	5.94E-01;1.17E+00;1.65E+00;2.67E+00	60751;62662;68075;71072	1.50E+00;8.44E-01;4.83E-01;1.49E-01
PSMB3	-2.72311	1.98355	4	CTCACCGTTTCTCATACAAG;CTATAACGGAGGGGCCGTCA;TGTATGAGTTGAAGGAAGGT;AAAGGTCTTCGGGTCCAACC	-3.63;-3.37;-2.6;-1.3	1614;2828;8274;20165	1.11E+00;2.13E+00;2.36E+00;2.34E+00	57277;69161;74614;75828	1.28E+00;1.26E+00;8.84E-01;3.66E-02
PSMB2	-2.28356	1.60246	4	AGGGCCAGCGCTGTATTACA;GAGGAGGTTCACATGATATG;AAGATATTACTCCTGTGTGT;TTTATAAGATGCGAAATGGT	-3.45;-2.22;-1.95;-1.51	2416;10854;12927;17386	9.45E-01;1.06E+00;1.81E+00;2.60E+00	60056;64505;66577;75026	1.45E+00;9.35E-01;4.48E-01;5.50E-02
PSMB1	-2.2842	1.65646	4	TTACCCTCCGTTGAAAACGT;GTATACAGCTTTGATCCAGT;TCTGATACTCGATTGAGTGA;ATAATAAGGCCATGACTACG	-3.01;-2.24;-1.95;-1.94	5168;10745;13006;13056	6.64E-01;1.07E+00;1.80E+00;3.09E+00	64386;64444;66707;72270	1.80E+00;9.32E-01;4.51E-01;1.20E-01
LMBR1L	-1.65524	1.15222	4	CAAGGAATACCACATACCCG;GGGCCGGGTCTATGAGACAG;GAGCCACACACCATGGATGA;AGCCATTGTGGACAAGAACA	-2.33;-2.14;-1.11;-1.04	10111;11465;23216;24462	4.64E-01;1.02E+00;1.12E+00;2.00E+00	52980;54226;65977;67344	1.06E+00;5.78E-01;4.36E-01;2.43E-01
TDGF1	-1.5863	0.929977	4	AAGGCCAGGTATCCCCGAGA;CTGTGCTGTATCCCCATGGG;ATTTCTAAAGTCTTTGAACT;GCCATGATCCAAATCACACT	-3.7;-3.13;-0.01;0.5	1318;4318;50612;63713	1.19E+00;1.78E+00;4.12E-01;3.39E-01	13729;26830;73133;76124	4.04E-01;5.12E-01;7.27E-01;2.98E-02
SETP7	-0.860233	0.439246	1	AGATTTCCATTTGATTTCGG	-0.86	28166	0.439	49276	0.196
SETP6	-0.860233	0.439246	1	AGATTTCCATTTGATTTCGG	-0.86	28166	0.439	49276	0.196
SETP3	-1.18144	0.54641	1	ACTTAATGAACAAGCCAGTG	-1.18	22007	0.546	55435	0.145
SETP2	-1.18144	0.54641	1	ACTTAATGAACAAGCCAGTG	-1.18	22007	0.546	55435	0.145
SETP8	-1.31295	0.588332	1	CAAAGTCCACCAAAATCAAA	-1.31	19982	0.588	57460	0.13
LTN1	-0.192907	0.575359	4	AGAGACACAGAAACTGTGAA;CTATCAACTGTGATTCGTGA;AAAGCATGTTTATCTGAACT;ACGTGTACTTGGTAATACGT	-1.22;-0.36;-0.24;1.04	21428;40559;44201;72062	3.78E-01;4.28E-01;4.96E-01;1.25E-01	5380;33241;36883;56014	6.50E-01;4.44E-01;6.45E-01;5.63E-01
LOC101928236	-0.846391	0.759154	5	GGAATCTCACTCTGTCACCC;GCCGAGGCGGGCAGATCACG;CAAGGCAGGCAGATCACCTG;GTGAAACGAATGCTCCATGT;TCCTGCCTCAGCCTCCCGAG	-1.53;-1.31;-0.53;-0.46;-0.4	17134;20055;35879;37810;39519	3.91E-01;5.64E-01;5.43E-01;8.37E-01;1.46E+00	37923;39632;41563;57387;60308	7.80E-01;5.16E-01;4.79E-01;4.08E-01;5.43E-01
C9orf147	-0.79711	0.466017	4	TCAGTGGTGGACTGATATTG;GGAATCTCACTCTGTCACCC;GCTGCTATGGATATGCTGGG;GACGTTTATGCAATTAAACC	-2.57;-1.53;0.18;0.73	8458;17134;56280;67945	5.10E-01;7.49E-01;3.77E-01;2.27E-01	9497;21162;60308;68974	4.80E-01;6.26E-01;3.79E-01;2.01E-01
TRIML2	0.173871	0.877702	4	ACATCACAGAACAGCCGTGT;CATGGTGTGTGGGATACAAG;AGAACTATGAGATTGAGACA;TCTTACCTTGAGCAATGCCA	-0.58;0.13;0.47;0.68	34595;54966;63096;67128	5.19E-01;5.94E-01;3.97E-01;2.48E-01	10314;14346;22476;42847	4.60E-01;8.64E-01;1.16E+00;1.03E+00
LOC101928231	-1.03094	0.565474	2	GGAATCTCACTCTGTCACCC;CAAGGCAGGCAGATCACCTG	-1.53;-0.53	17134;35879	4.63E-01;6.68E-01	41563;60308	3.03E-01;2.17E-01
TRIML1	-0.59015	0.598167	4	TCCAGTCAAACGAGCGTCTG;GGCTGTACTAACCCATGAGA;CACGAGATAGGCATTAGCTG;GATGCACTCTGTTTGCACCA	-0.93;-0.73;-0.7;-0.0	26566;31083;31758;50762	4.10E-01;4.60E-01;7.89E-01;7.34E-01	26680;45684;46359;50876	4.11E-01;4.55E-01;4.63E-01;7.30E-01
NACC2	-0.911389	0.657919	6	GCGAGCTCACCTTGAACATG;GGAATCTCACTCTGTCACCC;TATGCTTCACCCCTGCACAC;TCCTGCCTCAGCCTCCCGAG;CACCTCGTACCACAACGAGG;ACCCCGTAGTAGGAGACACG	-2.33;-1.53;-1.24;-0.4;-0.21;0.24	10113;17134;20996;39519;44910;57778	4.10E-01;5.69E-01;8.12E-01;6.13E-01;7.82E-01;7.63E-01	19664;32532;37923;56446;60308;67329	4.53E-01;5.24E-01;5.06E-01;5.07E-01;4.20E-01;3.65E-01
VPS13D	-1.155	1.35208	8	GAGAATCGCTTGAATCCGGG;GGAATCTCACTCTGTCACCC;GCCGAGGCGGGCAGATCACG;AGAGAACGGTTCACTACCAG;ACATCCGAGAGAATACTCGA;AAGGGGCGATCAACAAACCG;AGATCCACGACAACTAACAC;CAAGGCAGGCAGATCACCTG	-1.64;-1.53;-1.31;-1.2;-1.16;-1.14;-0.74;-0.53	15856;17134;20055;21754;22403;22779;30848;35879	4.82E-01;5.15E-01;6.63E-01;9.34E-01;1.39E+00;2.04E+00;2.12E+00;2.67E+00	41563;46594;54663;55039;55688;57387;60308;61585	1.71E+00;1.39E+00;1.36E+00;9.03E-01;6.22E-01;5.07E-01;5.12E-01;7.96E-01
NACC1	-0.501252	0.781492	4	GGCCGGCTGAGCATGAACGT;AGCCCGATGTCTGCGCCACG;GATGCGATTTCGGGACTCGG;GTACTGTGACGTGTCAGTGG	-3.72;0.44;0.61;0.67	1249;62433;65815;67060	1.21E+00;8.34E-01;4.33E-01;2.50E-01	10382;11627;15009;76193	4.58E-01;1.01E+00;1.63E+00;2.82E-02
VPS13A	-1.01282	0.810239	5	AATGGAAGACCTGTTAACGC;ATTAGTAGTAACTCCACTAG;TATGGATTATATCCGAACCA;TCAATAATATACAGTAGACC;TCCTGCCTCAGCCTCCCGAG	-1.83;-1.43;-0.94;-0.46;-0.4	13985;18341;26416;37935;39519	3.90E-01;6.03E-01;7.64E-01;8.33E-01;1.46E+00	37923;39507;51026;59101;63457	7.80E-01;5.14E-01;4.78E-01;3.96E-01;4.32E-01
SH3KBP1	-0.467507	0.525796	6	GAGAATCGCTTGAATCCGGG;GCCGAGGCGGGCAGATCACG;GGGAGGGACAGATCAACGGC;GTAACTTCACGAAGTTATCG;GAAAGTTGGCGACATCATAG;TGGGTCCGCTGACACACACC	-1.64;-1.31;-0.52;-0.02;-0.01;0.7	15856;20055;36173;50204;50600;67466	4.08E-01;5.18E-01;5.11E-01;4.84E-01;6.06E-01;3.59E-01	9976;26842;27238;41269;57387;61585	4.11E-01;4.84E-01;6.25E-01;5.78E-01;4.59E-01;5.97E-01
VPS13C	0.0360476	1.31799	4	TTCATACCAATGGTCGACGA;TAAATTTGAAACCAATCCGG;GAGAACATTTGACTTAACTG;AGAAAGGTTGCACTGAAACG	-3.43;0.9;1.03;1.65	2516;70428;71954;75638	9.29E-01;1.39E+00;6.43E-01;4.09E-02	1804;5488;7014;74925	1.06E+00;1.58E+00;2.57E+00;5.74E-02
VPS13B	-0.725609	0.669188	6	GCTGATGGGTCGAACCAACA;GCCGAGGCGGGCAGATCACG;TTGACCCAATCTTATATACG;CAAGGCAGGCAGATCACCTG;TGCAACCCATAGGTTCCACT;GAAACCTCATCTCGCTACAG	-1.51;-1.31;-0.85;-0.53;-0.52;0.37	17306;20055;28391;35879;36167;60939	4.22E-01;5.18E-01;6.01E-01;7.01E-01;1.15E+00;6.24E-01	16503;41275;41563;49051;57387;60136	4.14E-01;6.93E-01;5.12E-01;4.89E-01;4.59E-01;6.59E-01
BEX5	-0.316539	0.700375	4	CACATCCTCTCCAAAACCCG;TGATATGGAACGGTTCATGG;ATTCACCACCTCCTAAAGCG;GCCTGGAGGAAATGTTAAAG	-2.97;-0.42;0.76;1.37	5415;38865;68529;74465	6.48E-01;4.26E-01;4.96E-01;6.81E-02	2977;8913;38577;72021	8.64E-01;1.21E+00;6.05E-01;1.26E-01
BEX4	0.364427	0.982392	4	CCTGGAGGAAATATCAGGCG;AATGCCCAACAAGAAAACGA;CTAGCGGCAAACAATCTCAA;GAAGAATCCCGCCATTTGGG	-0.33;-0.1;0.23;1.66	41534;47969;57526;75677	6.70E-01;4.77E-01;3.75E-01;4.00E-02	1765;19916;29473;35908	1.07E+00;6.60E-01;8.65E-01;1.34E+00
BEX3	0.350447	1.00128	4	GCAGCCTATGCAGAATGGAG;CAGATCAATGATGGGATGGG;TATGGCCCATCGAAAATTAG;CAGCCTGCAGGAAATCGACG	-0.86;-0.04;0.91;1.38	28271;49746;70590;74567	4.27E-01;4.99E-01;5.72E-01;6.57E-02	2875;6852;27696;49171	8.78E-01;1.41E+00;9.30E-01;7.89E-01
BEX2	1.06784	2.09888	4	CAGTATTCACTAACATTCAA;AGCGTTAAACAATCTCATCG;ATAGATGGGACATAATGCAT;TGCCTAGAGGAAACCGTAGG	0.47;0.95;1.02;1.83	63207;71067;71860;76135	1.69E+00;1.47E+00;6.38E-01;2.95E-02	1307;5582;6375;14235	1.19E+00;1.57E+00;2.69E+00;2.94E+00
BEX1	-0.480719	0.74126	4	AGCAGTAAACAGTCTCAGCA;GTGTGCCTAGAGGAAATCGT;ATTCACCAGCATCCAAAGGG;ATAGATGGGATATGATGCAT	-4.07;-0.01;0.6;1.56	472;50445;65593;75343	1.62E+00;5.09E-01;4.30E-01;4.77E-02	2099;11849;26997;76970	1.00E+00;9.97E-01;9.57E-01;1.06E-02
TMEM160	-0.779458	0.472963	4	AGTGTCCGAGCTGGATCGTG;GGCAGCGCCTCGTACGCCGT;GAAAAGCGCACGAGACAGGT;GGTCGCTACTGCCGCCTCAG	-2.82;-0.56;-0.07;0.33	6621;35289;48830;59927	5.82E-01;4.33E-01;4.31E-01;4.45E-01	17515;28612;42153;70829	3.78E-01;4.87E-01;5.32E-01;1.55E-01
TMEM163	-0.901718	0.697849	6	TCTGTCATCCATATGTATAG;GGAATCTCACTCTGTCACCC;AGAGGCGCTGTACCTCATAA;CAAGGCAGGCAGATCACCTG;CCTGTGGCGTTACAGCAACG;GGCTTCGTGAGGTTTCAGGC	-2.37;-1.53;-0.72;-0.53;-0.23;-0.04	9852;17134;31289;35879;44454;49752	4.13E-01;5.69E-01;5.54E-01;7.01E-01;7.98E-01;1.15E+00	27690;32988;41563;46153;60308;67590	6.29E-01;5.29E-01;5.12E-01;5.10E-01;4.20E-01;3.55E-01
TMEM165	0.0205879	1.00913	6	CAGATGAAGACCTTAGCCAC;GGAATCTCACTCTGTCACCC;CAAGGCAGGCAGATCACCTG;CATAGTATGTATAGACCCTG;CGGCCCGCTCACCTCGACCC;CTTAAAGATGAGCCCTGATG	-2.02;-1.53;-0.53;0.7;1.49;2.01	12435;17134;35879;67540;75051;76467	3.96E-01;5.69E-01;5.12E-01;8.48E-01;8.00E-01;3.30E-02	975;2391;9903;41563;60308;65007	1.15E+00;1.90E+00;1.56E+00;5.73E-01;4.20E-01;4.56E-01
TMEM164	5.19627	8.58831	4	AGTAAATCTCCAATTCAAAG;ACGACGATAGCTCCCCGACA;CATCCTGAGGCAGACGAAGG;CCTGTGCCTGACCTTCGGGG	4.64;5.26;5.39;5.49	77413;77426;77429;77430	9.77E+00;6.68E+00;3.21E+00;2.47E-04	12;13;16;29	3.21E+00;6.81E+00;1.05E+01;1.38E+01
EVI2A	0.0245277	0.767075	4	GGACTGTTGCTGACGACAGA;TTACCTAGCTAGTATAGGTA;AAGCAAACTATACCCGTCTG;CCCACGGACATGGAACACAC	-0.68;-0.01;0.38;0.4	32284;50578;61220;61588	4.81E-01;5.11E-01;3.83E-01;3.98E-01	15854;16222;26864;45158	3.85E-01;7.84E-01;9.62E-01;9.37E-01
TMEM168	-0.650378	0.563694	5	GAGAATCGCTTGAATCCGGG;CTTAGGTCTATACGTAAGAT;TTAGTAAAGTGGGCCGATGA;TAACTCCTGTACATGTTCTG;AATTATCAAGAAAACATAGG	-1.64;-0.97;-0.46;-0.43;0.25	15856;25764;37784;38803;57991	3.88E-01;4.83E-01;5.16E-01;8.03E-01;6.28E-01	19451;38639;39658;51678;61585	4.04E-01;5.04E-01;4.95E-01;4.82E-01;4.97E-01
EVI2B	-0.86296	0.513367	5	GAGGTATAGACAGCTGGTGT;TGTTATCCATACAAATGTCA;CAAGGCAGGCAGATCACCTG;GTATAGACAAATGACTTTGG;CAACTGTCAAAAATTCACCT	-2.94;-1.45;-0.53;-0.04;0.65	5633;18195;35879;49755;66516	5.70E-01;6.07E-01;5.43E-01;5.16E-01;3.30E-01	10926;27687;41563;59247;71804	4.16E-01;4.70E-01;4.79E-01;3.95E-01;1.64E-01
FOXN1	-1.40685	0.750614	4	TCAGGAAGTTCCTCCCGCAA;ACACTATCAGTACCAGCGAA;GCCCTGGTGACGCAATGCGG;GAGCAGTACATATGCTGCAA	-3.47;-2.09;-0.31;0.25	2287;11906;41965;57830	9.67E-01;9.93E-01;5.35E-01;5.07E-01	19612;35477;65536;75154	3.75E-01;4.32E-01;4.29E-01;5.21E-02
FOXN2	-0.0733875	0.753973	5	AGAAGACTAAAGGAGTATGG;CAAGGCAGGCAGATCACCTG;TCTCCCTCTATGTCATACAA;CATAAACACTGACCTTGCCA;TGACTCACTGTCCACTAGAG	-1.91;-0.53;0.0;0.9;1.18	13289;35879;51187;70495;73237	3.94E-01;4.79E-01;4.79E-01;5.11E-01;1.21E-01	4205;6947;26381;41563;64153	6.63E-01;1.22E+00;7.65E-01;7.16E-01;4.09E-01
FOXN3	-0.570024	0.663178	7	GCCGAGGCGGGCAGATCACG;TGACATCCGATTAGAAGAGG;CATCGTAGGGCATGTCAGAG;CAAGGCAGGCAGATCACCTG;TCCTGCCTCAGCCTCCCGAG;GAGTGATCCAAAATGGAGCG;TGGACTGAGTCAGTGTTACG	-1.31;-1.07;-0.84;-0.53;-0.4;-0.29;0.45	20055;23944;28642;35879;39519;42522;62740	5.23E-01;5.01E-01;5.54E-01;6.03E-01;7.59E-01;1.06E+00;6.40E-01	14702;34920;37923;41563;48800;53498;57387	4.25E-01;6.71E-01;5.55E-01;5.39E-01;5.44E-01;6.28E-01;9.11E-01
NICN1	-0.492084	0.532511	5	CCTCGAAGGGAGCGACGCTG;CAAGGCAGGCAGATCACCTG;CGGAGCTACGCCTGATTCTG;TGTGTGCTGAGGTGTACTGA;AATGCCTGACCCACACAGTG	-2.67;-0.53;-0.09;0.35;0.48	7675;35879;48464;60515;63389	4.86E-01;4.79E-01;4.64E-01;3.90E-01;4.35E-01	14053;16927;28978;41563;69777	3.90E-01;6.42E-01;6.88E-01;7.16E-01;2.26E-01
COL14A1	-1.24378	0.791697	6	AATTCTATAGCCTTTCACCG;TAACAGTGCTCGATTAACCT;GGAATCTCACTCTGTCACCC;GGGCATCCCAAAGGTTATCG;CAAGGCAGGCAGATCACCTG;GTTGTTATAGAATCCCTCCA	-2.86;-2.74;-1.53;-0.54;-0.53;0.74	6280;7140;17134;35726;35879;68150	4.96E-01;1.06E+00;9.90E-01;7.05E-01;1.16E+00;3.33E-01	9292;41563;41716;60308;70314;71147	4.20E-01;7.01E-01;5.13E-01;5.69E-01;4.68E-01;2.21E-01
OR4D12P	-0.265841	0.356115	1	GATCCTCTGAGAGTCCCAGG	-0.27	43334	0.252	34108	0.356
TAP1	-2.47804	1.8431	4	GGCTCCAAGAGCGAAAACGC;AGTTCGAAGCTTTGCCAACG;CATCATGTCTCGGGTAACAG;GCCATGCGAGAGAAGCTCCG	-4.6;-2.33;-2.0;-0.99	64;10137;12571;25394	2.48E+00;1.11E+00;1.84E+00;1.94E+00	52048;64871;67305;77378	1.02E+00;9.55E-01;4.64E-01;1.41E-03
TAP2	-1.04637	0.663892	4	CATGCCCTTCACAATAGCAG;ATCCCCATATATGTATACCA;GTTGATTCGAGACATGGTGT;ACAACAAAGTCTTGATGTGG	-2.25;-1.12;-0.73;-0.08	10651;23042;31013;48600	4.52E-01;5.82E-01;8.12E-01;8.09E-01	28842;46429;54400;66791	4.34E-01;4.61E-01;3.85E-01;2.57E-01
SNAP91	-0.80395	0.579521	4	CTAGCTGTAGGGGTAACTAC;AAGAGTATGCCAATACTACA;CCAAAGATATCTAGAGCAGG;GGCAACAAACAGTAGCTGGG	-3.72;-0.31;0.26;0.56	1263;41985;58126;65001	1.21E+00;4.32E-01;3.75E-01;3.04E-01	12441;19316;35457;76179	4.20E-01;6.77E-01;6.82E-01;2.85E-02
RPL15P3	-1.3824	0.671005	3	CTGGGCTACAAGGCCAAGCA;TATAGGATTCGTGTTCGCCG;GCGCGCTTTATCAGGCCGGG	-2.95;-1.71;0.52	5569;15115;64126	7.31E-01;1.04E+00;2.46E-01	13316;62330;71873	4.51E-01;4.21E-01;9.72E-02
RPL15P2	-1.71324	0.709563	1	TATAGGATTCGTGTTCGCCG	-1.71	15115	0.71	62330	0.0943
RPL15P7	-1.21699	0.519222	2	CTGGGCTACAAGGCCAAGCA;GCGCGCTTTATCAGGCCGGG	-2.95;0.52	5569;64126	8.75E-01;1.64E-01	13316;71873	5.46E-01;6.48E-02
LOC100288798	-1.30793	0.586748	1	GCCGAGGCGGGCAGATCACG	-1.31	20055	0.587	57387	0.13
RPL15P9	-1.71324	0.709563	1	TATAGGATTCGTGTTCGCCG	-1.71	15115	0.71	62330	0.0943
MACROD2	-0.814061	1.06267	16	AACCCCAGGGAATTGTGCTA;AGGTGACATCACATTGCTAG;GGAATCTCACTCTGTCACCC;TCGCCCAAGCTAGAGTGCAG;GCTTGCCAAGAATCACCATG;GTGGCAGGCACAATCTCCGG;TAAATGCCTGTTGAGATGCA;GCCGAGGCGGGCAGATCACG;ACTGTAGGGCCAATAGCCAG;AACACAGTGTATCCTGCCCA;CAAGGCAGGCAGATCACCTG;TTCCATAACATAAAAGCACA;ATGGGCAGCAAGACCCTGCG;ACAGCTCTGTCAAATTAACT;CATTCCAACAGGAATACCAG;CAAGTCCCGAGGCTACGTGA	-2.05;-1.55;-1.53;-1.41;-1.37;-1.35;-1.32;-1.31;-1.23;-0.65;-0.53;-0.44;-0.17;0.27;0.43;1.17	12149;16875;17134;18711;19188;19384;19948;20055;21255;32949;35879;38393;46135;58601;62244;73202	7.12E-01;7.39E-01;6.29E-01;6.49E-01;7.50E-01;9.57E-01;1.23E+00;1.63E+00;1.97E+00;1.25E+00;1.39E+00;1.59E+00;1.36E+00;8.44E-01;9.26E-01;3.91E-01	4240;15198;18841;31307;39049;41563;44493;56187;57387;57494;58058;58254;58730;60308;60567;65297	4.24E-01;6.64E-01;6.67E-01;1.01E+00;1.20E+00;1.06E+00;9.67E-01;1.50E+00;1.22E+00;9.25E-01;7.44E-01;6.47E-01;6.64E-01;7.51E-01;1.06E+00;1.19E+00
MACROD1	-0.995293	0.742508	9	GACACTTGGCGGGTGCCACG;GAGGCCCCGCACGTTGACCA;GCCGAGGCGGGCAGATCACG;GTCCTCCTCAATGCTGACGG;CCGCCGAGGTCCGCGCACGG;GTGGACGCCATCGTCAACGC;GGTAGTCAATGTTGGAGTCG;GGCACTCGTCGGTAAGCAGG;AACAACCAGATCAACAACGC	-3.35;-3.12;-1.31;-0.92;-0.57;-0.15;-0.03;0.16;0.33	2967;4413;20055;26738;34935;46746;49931;55551;59996	5.98E-01;1.11E+00;6.17E-01;6.67E-01;6.70E-01;5.97E-01;6.77E-01;7.49E-01;9.98E-01	17446;21891;27511;30696;42507;50704;57387;73031;74474	5.80E-01;5.51E-01;5.68E-01;6.03E-01;5.85E-01;5.65E-01;5.28E-01;4.94E-01;1.53E-01
LOC730183	1.19281	1.87768	4	CGATAGCGATTCCGAGCGAG;AAGCTGCAGCAAGTTAGCAG;GGGCTGCCATGGGAATCGGG;CGGAATCGCTATCGCCGGCG	-0.02;0.31;1.58;2.91	50201;59446;75401;77183	9.48E-01;7.19E-01;1.01E+00;5.80E-03	259;2041;17996;27241	1.88E+00;2.40E+00;1.41E+00;1.82E+00
KRR1	-1.44623	1.08465	4	TAAGCCACTAAAAGGTCCAA;TCCAACCATCAGGAACCGTA;GTAGCATGTTAATGCAACCC;AACTTTGTTCCCAAAATACA	-1.9;-1.64;-1.34;-0.9	13370;15882;19565;27216	4.08E-01;7.97E-01;1.32E+00;1.82E+00	50226;57877;61560;64064	9.48E-01;6.70E-01;3.85E-01;3.29E-01
STRN	-0.896517	0.612425	5	CACAGGTATCTACAGGAGGT;GGGAGTAATTACCAAACTCA;GCCGAGGCGGGCAGATCACG;AAAAAAGCATTGCCTGACAG;AGAACTAGCAGGCCTTACGG	-2.04;-1.67;-1.31;0.18;0.35	12272;15511;20055;56289;60557	4.01E-01;6.88E-01;1.02E+00;4.19E-01;5.34E-01	16885;21153;57387;61931;65170	3.90E-01;5.43E-01;5.64E-01;3.88E-01;3.75E-01
HMGN1P4	0.672513	0.871604	1	AAAGGGAAAACAGGCCGAAG	0.67	67034	0.0627	10408	0.872
HMGN1P3	0.672513	0.871604	1	AAAGGGAAAACAGGCCGAAG	0.67	67034	0.0627	10408	0.872
HIST2H3PS2	-1.18802	0.696594	4	CCTTGCCGCCGGTCGACTTG;GGTAGCCAGCTGCTTCCTCG;CTCGCGTACCAGCCGCTGGA;CCGCTACCGGCCCGGCACCG	-2.44;-1.68;-0.56;-0.07	9333;15457;35314;48811	4.84E-01;8.15E-01;6.85E-01;8.02E-01	28632;42128;61987;68100	4.31E-01;4.33E-01;3.88E-01;2.23E-01
C8orf48	-0.86015	0.532039	4	GAATCTACTTTAAAAACATG;AAATTTGATTCATCGTAGAG;TTTGAAGAACTCTACTGATG;GGAAAAGCAGACTCCAAGCT	-2.64;-2.31;0.37;1.13	7963;10264;61005;72830	5.27E-01;1.10E+00;3.82E-01;1.07E-01	4612;16437;67178;69461	7.03E-01;7.75E-01;4.61E-01;1.89E-01
C8orf46	-0.259403	0.58269	4	CCAAAACATCAAATCTGTGT;CATGGCTGTCGCCTCCAATG;CCGGCAGGTGGTGATCGAGT;GCGACCGCCGCAGGTTTGGG	-0.88;-0.4;0.08;0.16	27663;39621;53432;55699	4.21E-01;4.26E-01;3.90E-01;5.73E-01	21743;24010;37821;49779	3.79E-01;5.61E-01;6.23E-01;7.68E-01
C8orf44	-1.22791	0.777542	4	GGGAGCACTTCGAAAACCAC;CCTCCCATGAGGGAAAGTGT;CAAGGCAGGCAGATCACCTG;AGAAGCAGAAAAGGCAAAAG	-2.53;-1.38;-0.53;-0.47	8689;19106;35879;37646	5.03E-01;6.84E-01;6.71E-01;1.25E+00	39796;41563;58336;68747	6.27E-01;4.31E-01;3.75E-01;2.07E-01
TP53I3	-0.0343837	0.713688	4	CCAGGGACACTGGAAGATCG;CTAATCCATGCAGGACTGAG;GAACCGGGCGGACTTAATGC;GCAACGCTGAAATTCACCAA	-0.63;-0.49;-0.41;1.39	33439;36969;39303;74601	4.99E-01;4.28E-01;5.89E-01;6.49E-02	2841;38139;40473;44003	8.82E-01;4.26E-01;5.65E-01;9.82E-01
MB	-0.12592	0.689343	4	TAAGAAGAAGGGGCATCATG;AGGCTGACATCCCAGGCCAT;CTTAAGGATGCCACCCAGGG;CAAACTTCTCCAGAGTCTCT	-0.64;-0.15;0.13;0.16	33167;46627;54700;55672	4.95E-01;4.63E-01;3.83E-01;5.73E-01	21770;22742;30815;44275	3.79E-01;5.88E-01;8.19E-01;9.71E-01
DUX4L7	-2.13368	1.33946	3	TCCAGGCATCGCCGCCCGGG;ACACCGGCGCGTGGGGAACG;GGCAGGCGGCCTGTGCAGCG	-2.5;-2.04;-1.86	8934;12264;13744	5.67E-01;1.20E+00;2.25E+00	63698;65179;68513	1.11E+00;4.73E-01;1.60E-01
DUX4L6	-2.13368	1.33946	3	TCCAGGCATCGCCGCCCGGG;ACACCGGCGCGTGGGGAACG;GGCAGGCGGCCTGTGCAGCG	-2.5;-2.04;-1.86	8934;12264;13744	5.67E-01;1.20E+00;2.25E+00	63698;65179;68513	1.11E+00;4.73E-01;1.60E-01
DUX4L5	-2.13368	1.33946	3	TCCAGGCATCGCCGCCCGGG;ACACCGGCGCGTGGGGAACG;GGCAGGCGGCCTGTGCAGCG	-2.5;-2.04;-1.86	8934;12264;13744	5.67E-01;1.20E+00;2.25E+00	63698;65179;68513	1.11E+00;4.73E-01;1.60E-01
DUX4L4	-2.13368	1.33946	3	TCCAGGCATCGCCGCCCGGG;ACACCGGCGCGTGGGGAACG;GGCAGGCGGCCTGTGCAGCG	-2.5;-2.04;-1.86	8934;12264;13744	5.67E-01;1.20E+00;2.25E+00	63698;65179;68513	1.11E+00;4.73E-01;1.60E-01
DUX4L3	-2.13368	1.33946	3	TCCAGGCATCGCCGCCCGGG;ACACCGGCGCGTGGGGAACG;GGCAGGCGGCCTGTGCAGCG	-2.5;-2.04;-1.86	8934;12264;13744	5.67E-01;1.20E+00;2.25E+00	63698;65179;68513	1.11E+00;4.73E-01;1.60E-01
DUX4L2	-2.13368	1.33946	3	TCCAGGCATCGCCGCCCGGG;ACACCGGCGCGTGGGGAACG;GGCAGGCGGCCTGTGCAGCG	-2.5;-2.04;-1.86	8934;12264;13744	5.67E-01;1.20E+00;2.25E+00	63698;65179;68513	1.11E+00;4.73E-01;1.60E-01
DUX4L1	-2.13368	1.33946	3	TCCAGGCATCGCCGCCCGGG;ACACCGGCGCGTGGGGAACG;GGCAGGCGGCCTGTGCAGCG	-2.5;-2.04;-1.86	8934;12264;13744	5.67E-01;1.20E+00;2.25E+00	63698;65179;68513	1.11E+00;4.73E-01;1.60E-01
SLC18A3	0.00902314	0.746145	4	GCCCAGCACATGAGGCACGA;GATCGCCGATAAGTACCCGG;CAGCGCGTCAAAGAGCGACA;TACATCGCCCACATGCGCGG	-0.44;-0.23;0.22;0.5	38301;44352;57108;63708	5.93E-01;4.45E-01;3.76E-01;3.39E-01	13734;20334;33090;39141	4.03E-01;6.48E-01;7.48E-01;1.19E+00
SLC18A2	-0.423317	0.585715	4	TCCTTCAGCAGCGTGGTTAG;ACAGATAACTTGGGATGATG;CATAGAGCACACTCCCGAAG;GGGACAGTCGGAAGGAACAG	-0.74;-0.53;-0.24;-0.19	30820;36013;44054;45646	4.59E-01;4.30E-01;4.98E-01;9.18E-01	31796;33388;41429;46622	4.73E-01;4.43E-01;5.45E-01;8.82E-01
SLC18A1	-0.378763	0.661524	4	GAGGAAGAGATTACCCGGGT;TCTTTGAGAAGCATAAAGAG;TTCATCCATGCTATTCCACT;GGCCACAAAGAGTAGAGTAT	-3.15;-0.14;0.56;1.22	4174;46870;64898;73579	7.39E-01;4.65E-01;4.19E-01;8.89E-02	3863;12544;30572;73275	7.67E-01;9.56E-01;8.27E-01;9.61E-02
DUX4L9	-2.13368	1.33946	3	TCCAGGCATCGCCGCCCGGG;ACACCGGCGCGTGGGGAACG;GGCAGGCGGCCTGTGCAGCG	-2.5;-2.04;-1.86	8934;12264;13744	5.67E-01;1.20E+00;2.25E+00	63698;65179;68513	1.11E+00;4.73E-01;1.60E-01
DUX4L8	-2.18102	1.09593	2	TCCAGGCATCGCCGCCCGGG;GGCAGGCGGCCTGTGCAGCG	-2.5;-1.86	8934;13744	6.90E-01;1.50E+00	63698;68513	5.35E-01;1.06E-01
RALBP1	-0.567884	0.631507	5	ACAATCCAGGAAACTTAGTA;AAAAGCAGCCTATGACCGGG;CAAGGCAGGCAGATCACCTG;AAGTGATGAAACCTCTGCGA;CATGGACCATGTCATTGCAA	-1.37;-0.55;-0.53;-0.26;-0.13	19193;35519;35879;43622;47128	4.02E-01;4.77E-01;5.43E-01;6.58E-01;1.08E+00	30314;33820;41563;41923;58249	5.71E-01;4.67E-01;4.79E-01;7.06E-01;6.18E-01
ZNF831	-1.56526	0.989511	4	AGCACAGCGCCGAGTCCGAG;TCCATGAGGACATATCCGCA;GTCCGCATTTGCCGACAGAG;GGCACACTTAGTTCAGGACA	-2.68;-1.76;-1.38;-0.45	7617;14708;19071;38284	5.40E-01;8.48E-01;1.35E+00;1.22E+00	39158;58371;62734;69825	6.12E-01;6.85E-01;3.94E-01;1.80E-01
ZNF830	-1.89526	1.37163	4	CCAAGATGTCAAGAGAGCGA;CTTAACCGGAGTGTTACACA;TAAATCAGGAAGAATTGCGG;GGAAAGGAGAGAAAACACCG	-2.39;-2.01;-1.97;-1.21	9712;12484;12763;21487	4.74E-01;9.60E-01;1.83E+00;2.23E+00	55955;64679;64964;67737	1.21E+00;9.44E-01;4.20E-01;2.33E-01
ZNF835	-1.6145	1.12451	4	CCGACGACAGCAGTTCCCGG;CAAGAAGCCGTGGAAATGCG;CTGCGTCAGGTGCGACACCT;GATGCGCTGGTGCTCTATCA	-2.43;-1.73;-1.39;-0.9	9444;14912;18851;27190	4.81E-01;8.39E-01;1.36E+00;1.82E+00	50252;58591;62530;67999	9.50E-01;6.91E-01;3.92E-01;2.26E-01
ZNF837	-0.290981	0.686632	4	GACAATAGGGCGAGGTCGCG;CTGAGCTGGTTATCCCCGAG;GGAGCCGCCCCACTCAAAAG;TGTGTGACCCCTGTCCGGAG	-2.96;-0.05;0.17;1.67	5521;49529;56057;75703	6.41E-01;4.96E-01;3.78E-01;3.94E-02	1739;21385;27913;71919	1.08E+00;6.20E-01;9.22E-01;1.29E-01
ZNF836	-0.0448864	0.978411	5	CAGCATCAGAGAATTCACAC;TGTGGGAAAACCTTCAAACA;ATCAGATAGTCCATACAAGG;CCTTCCTAAATGTATGACCA;GTCAGACTTCACATCTTGTG	-2.92;0.27;0.33;0.43;1.66	5816;58581;60007;62292;75668	5.61E-01;1.08E+00;6.27E-01;3.88E-01;5.03E-02	1774;15150;17435;18861;71615	9.81E-01;7.01E-01;1.16E+00;1.88E+00;1.70E-01
ZNF839	-0.829833	0.677497	6	TTGCGATCAGAGAGATACCA;GGAATCTCACTCTGTCACCC;TTATAAGTTCATAAAAACAG;CAAGGCAGGCAGATCACCTG;CATCAGAAGAAACTCATACA;CAGCGAGAAGAGGGAACGTG	-1.66;-1.53;-1.28;-0.53;-0.24;0.26	15671;17134;20458;35879;44106;58173	4.07E-01;5.69E-01;8.33E-01;7.01E-01;8.10E-01;7.46E-01	19269;33336;41563;56984;60308;61771	4.47E-01;5.34E-01;5.12E-01;5.13E-01;4.20E-01;5.89E-01
LRIF1	-0.474227	0.597085	9	TAAAAGTAAATCTTCCCAGA;TTGAGTACCATCGATCCTAG;GGAGATACATAAATAACGGT;AGCCACATACTCATTCAGCT;TCCTGCCTCAGCCTCCCGAG;ATGACTGAAGATTGAACTAG;TATTGTCTGAGTGGTAACGG;TGTACTCACAAATGACTGGA;CTGCTGATCCACAACAACTT	-2.0;-1.59;-1.3;-0.77;-0.4;0.14;0.17;0.33;1.15	12552;16381;20108;30073;39519;55102;55985;59949;73037	4.50E-01;5.15E-01;6.16E-01;6.10E-01;6.01E-01;5.82E-01;5.45E-01;5.81E-01;2.29E-01	4405;17493;21457;22340;37923;47369;57335;61061;64890	4.94E-01;5.14E-01;5.93E-01;7.98E-01;6.19E-01;5.89E-01;5.29E-01;5.46E-01;6.91E-01
OXCT2P1	-2.0393	0.993511	2	CGTAGGAACAGACGATGCGA;GCTCATGAGCCAGCCCCGAG	-2.65;-1.43	7896;18369	7.37E-01;1.25E+00	59073;69558	4.41E-01;9.32E-02
FAM91A1	-0.531609	0.514025	4	TTACGATATAGAAATAACTT;AAATTGCCATAGAGGCGTGG;TTTGTAATGAATCGAGTGCA;ATTTATCATGTCACTGGACA	-1.03;-0.92;-0.24;0.07	24612;26860;43936;53261	3.94E-01;5.12E-01;5.00E-01;6.50E-01	24181;33506;50582;52830	3.91E-01;4.42E-01;4.13E-01;6.64E-01
SUGCT	-0.855777	0.814527	8	CAGGAGACTCACCTGAACCT;GAGAATCGCTTGAATCCGGG;GCCGAGGCGGGCAGATCACG;GGAGGGTACCTGACTGCGGG;TAATATCAAGGATCCAAAAG;CAAGGCAGGCAGATCACCTG;ATGGAACAATAGATGATGTG;GGTGATGATACACGAACTTG	-1.83;-1.64;-1.31;-0.82;-0.69;-0.53;-0.16;0.13	13965;15856;20055;29048;31992;35879;46515;54883	4.45E-01;5.27E-01;6.63E-01;6.75E-01;8.66E-01;1.10E+00;1.05E+00;1.20E+00	22559;30927;41563;45450;48394;57387;61585;63477	6.79E-01;6.78E-01;7.33E-01;6.16E-01;5.50E-01;5.07E-01;4.82E-01;6.91E-01
TSPY8	-0.40611	0.913491	21	CAGGATGGAGGCTGTACAGG;CGGCAGGGTTTCTGTGGCGT;TCTGGATGACGGCGCCTCTG;CTTGGTGTGTGCGAGTGCCA;AGGCTGCGGCAGGGTTTCTG;AGGAGGAGGGCCTCGTGGAG;GTGTGTGCGAGTGCCAAGGA;GGAGGGCCTCGTGGAGCGGC;GCGCCTCTGCGGTCTAGGTG;AGCGGGAAAAGATGGAGCGG;CGGCGCCTCTGCGGTCTAGG;GACCCCAGAGTCTGCACTGG;GCTCCTCCAGTGCAGACTCT;GGTGTGTGCGAGTGCCAAGG;GGCGGAGGAGGAGGGCCTCG;AAGCCCCACCTAGACCGCAG;GTTGGATGACATAATGGCGG;GCTGTTGGATGACATAATGG;GGCGCCTCTGCGGTCTAGGT;…	-3.46;-2.86;-1.98;-1.8;-1.12;-1.07;-1.04;-1.01;-0.95;-0.63;-0.06;0.15;0.16;0.32;0.37;0.37;0.64;1.14;1.16;1.35;1.79	2372;6305;12688;14345;22965;23929;24415;24990;26291;33436;49091;55288;55764;59593;60905;60955;66437;72876;73111;74362;76048	4.62E-01;5.57E-01;6.32E-01;6.64E-01;7.75E-01;7.34E-01;7.46E-01;8.21E-01;9.16E-01;8.00E-01;9.94E-01;1.18E+00;9.69E-01;9.89E-01;8.53E-01;7.14E-01;7.44E-01;1.04E+00;6.57E-01;4.31E-01;1.66E-01	1394;3080;4331;4566;11005;16487;16537;17849;21678;22154;28351;44006;51151;52452;53027;53513;54477;63097;64756;71132;75068	5.80E-01;8.13E-01;1.08E+00;1.59E+00;9.93E-01;8.56E-01;1.09E+00;1.27E+00;1.22E+00;1.50E+00;1.23E+00;7.60E-01;7.86E-01;7.42E-01;7.41E-01;8.10E-01;9.32E-01;6.74E-01;7.25E-01;5.05E-01;2.84E-01
CPEB2	-0.804299	0.556663	5	TGAGGTATATTCATGGCGGG;AAGCCGGTGACAGGCAACGG;CAAGGCAGGCAGATCACCTG;GTGGTCGGGGAGTTTCTCCG;AGGAGGCCAAGCCCGCATTG	-3.1;-0.65;-0.53;-0.49;0.75	4530;32959;35879;37041;68303	6.39E-01;4.64E-01;5.43E-01;8.65E-01;2.73E-01	9139;40401;41563;44483;72919	4.47E-01;5.26E-01;4.79E-01;6.35E-01;1.31E-01
TSPY3	-0.40611	0.913491	21	CAGGATGGAGGCTGTACAGG;CGGCAGGGTTTCTGTGGCGT;TCTGGATGACGGCGCCTCTG;CTTGGTGTGTGCGAGTGCCA;AGGCTGCGGCAGGGTTTCTG;AGGAGGAGGGCCTCGTGGAG;GTGTGTGCGAGTGCCAAGGA;GGAGGGCCTCGTGGAGCGGC;GCGCCTCTGCGGTCTAGGTG;AGCGGGAAAAGATGGAGCGG;CGGCGCCTCTGCGGTCTAGG;GACCCCAGAGTCTGCACTGG;GCTCCTCCAGTGCAGACTCT;GGTGTGTGCGAGTGCCAAGG;GGCGGAGGAGGAGGGCCTCG;AAGCCCCACCTAGACCGCAG;GTTGGATGACATAATGGCGG;GCTGTTGGATGACATAATGG;GGCGCCTCTGCGGTCTAGGT;…	-3.46;-2.86;-1.98;-1.8;-1.12;-1.07;-1.04;-1.01;-0.95;-0.63;-0.06;0.15;0.16;0.32;0.37;0.37;0.64;1.14;1.16;1.35;1.79	2372;6305;12688;14345;22965;23929;24415;24990;26291;33436;49091;55288;55764;59593;60905;60955;66437;72876;73111;74362;76048	4.62E-01;5.57E-01;6.32E-01;6.64E-01;7.75E-01;7.34E-01;7.46E-01;8.21E-01;9.16E-01;8.00E-01;9.94E-01;1.18E+00;9.69E-01;9.89E-01;8.53E-01;7.14E-01;7.44E-01;1.04E+00;6.57E-01;4.31E-01;1.66E-01	1394;3080;4331;4566;11005;16487;16537;17849;21678;22154;28351;44006;51151;52452;53027;53513;54477;63097;64756;71132;75068	5.80E-01;8.13E-01;1.08E+00;1.59E+00;9.93E-01;8.56E-01;1.09E+00;1.27E+00;1.22E+00;1.50E+00;1.23E+00;7.60E-01;7.86E-01;7.42E-01;7.41E-01;8.10E-01;9.32E-01;6.74E-01;7.25E-01;5.05E-01;2.84E-01
TSPY2	-0.161431	1.09507	19	TCTGGATGACGGCGCCTCTG;CTTGGTGTGTGCGAGTGCCA;AGGAGGAGGGCCTCGTGGAG;GTGTGTGCGAGTGCCAAGGA;GGAGGGCCTCGTGGAGCGGC;GCGCCTCTGCGGTCTAGGTG;AGCGGGAAAAGATGGAGCGG;CTGCACAGCCTCCATCCTGA;CGGCGCCTCTGCGGTCTAGG;GACCCCAGAGTCTGCACTGG;GCTCCTCCAGTGCAGACTCT;AGGCTGCGGCAGGGTTCCTG;GGTGTGTGCGAGTGCCAAGG;GGCGGAGGAGGAGGGCCTCG;AAGCCCCACCTAGACCGCAG;GTTGGATGACATAATGGCGG;GCTGTTGGATGACATAATGG;GGCGCCTCTGCGGTCTAGGT;CTCCTCCAGTGCAGACTCTG	-1.98;-1.8;-1.07;-1.04;-1.01;-0.95;-0.63;-0.45;-0.06;0.15;0.16;0.27;0.32;0.37;0.37;0.64;1.14;1.16;1.35	12688;14345;23929;24415;24990;26291;33436;38050;49091;55288;55764;58527;59593;60905;60955;66437;72876;73111;74362	9.06E-01;7.44E-01;1.11E+00;8.84E-01;7.60E-01;7.23E-01;7.97E-01;8.20E-01;1.18E+00;1.39E+00;1.11E+00;1.04E+00;8.70E-01;7.48E-01;6.58E-01;6.21E-01;6.75E-01;4.23E-01;3.35E-01	3080;4331;4566;11005;16487;16537;17849;18915;21678;22154;28351;39392;44006;51151;52452;53027;53513;63097;64756	4.39E-01;6.97E-01;1.12E+00;8.00E-01;7.49E-01;9.46E-01;1.12E+00;1.36E+00;1.44E+00;1.79E+00;1.51E+00;9.81E-01;9.46E-01;8.02E-01;9.15E-01;1.15E+00;1.52E+00;1.05E+00;1.48E+00
TSPY1	-0.45767	0.783092	18	CGGCAGGGTTTCTGTGGCGT;TCTGGATGACGGCGCCTCTG;CTTGGTGTGTGCGAGTGCCA;AGGCTGCGGCAGGGTTTCTG;AGGAGGAGGGCCTCGTGGAG;GTGTGTGCGAGTGCCAAGGA;GGAGGGCCTCGTGGAGCGGC;GCGCCTCTGCGGTCTAGGTG;AGCGGGAAAAGATGGAGCGG;CTGCACAGCCTCCATCCTGA;CGGCGCCTCTGCGGTCTAGG;GGTGTGTGCGAGTGCCAAGG;GGCGGAGGAGGAGGGCCTCG;AAGCCCCACCTAGACCGCAG;GTTGGATGACATAATGGCGG;GACCCCAGAGTCTGCACCGG;GCTGTTGGATGACATAATGG;GGCGCCTCTGCGGTCTAGGT	-2.86;-1.98;-1.8;-1.12;-1.07;-1.04;-1.01;-0.95;-0.63;-0.45;-0.06;0.32;0.37;0.37;0.64;0.74;1.14;1.16	6305;12688;14345;22965;23929;24415;24990;26291;33436;38050;49091;59593;60905;60955;66437;68178;72876;73111	4.61E-01;6.30E-01;6.20E-01;7.65E-01;7.04E-01;7.13E-01;7.97E-01;9.13E-01;8.05E-01;7.94E-01;7.30E-01;9.21E-01;7.76E-01;6.57E-01;6.29E-01;5.45E-01;4.23E-01;4.50E-01	4331;4566;9264;11005;16487;16537;17849;28351;39392;44006;51151;52452;53027;53513;54477;63097;64756;71132	4.22E-01;6.96E-01;6.85E-01;8.36E-01;7.78E-01;1.01E+00;1.21E+00;8.30E-01;7.33E-01;7.32E-01;7.63E-01;7.09E-01;7.12E-01;8.02E-01;9.63E-01;7.03E-01;8.51E-01;6.64E-01
LOC105373606	-1.30793	0.586748	1	GCCGAGGCGGGCAGATCACG	-1.31	20055	0.587	57387	0.13
SLC17A8	-0.632277	0.672172	5	TACACTTAGACTAACCACGT;AAAAATCGATGGGACAACTG;CAAGGCAGGCAGATCACCTG;TAGCAATGATGTAACGCTTG;AATTCTGCAAGGTTTAGTGG	-1.4;-0.59;-0.53;-0.51;-0.12	18740;34392;35879;36551;47385	3.99E-01;4.70E-01;5.43E-01;8.83E-01;1.07E+00	30057;40891;41563;43050;58702	5.65E-01;5.33E-01;4.79E-01;6.74E-01;6.02E-01
SLC17A9	-0.337797	0.634211	4	GGCCAGGACTTACCCAAACT;GGAGACCTTCCCCGACGCCA;CACGTACCACACCCAAAGCA;GCAGTTACCGATCCCCGAGG	-2.41;-0.87;0.68;1.26	9536;27930;67113;73806	4.79E-01;4.96E-01;4.59E-01;8.35E-02	3636;10329;49512;67906	7.89E-01;1.10E+00;4.24E-01;2.28E-01
RAB33B	-0.630132	0.533285	4	TGCTAGCCAATGATATACCA;AGAACGATTCAGAAAGAGCA;GTGATCGGCGACTCCAATGT;GGTGGATTTCCGAGAACGAG	-3.07;0.07;0.08;0.4	4739;53240;53466;61595	6.93E-01;5.58E-01;3.90E-01;3.98E-01	15847;23976;24202;72698	3.85E-01;5.62E-01;1.08E+00;1.10E-01
SLC17A4	-1.09153	0.836853	4	CCAGTTAATACCATAACCTG;ACAGGATCATCATAAATGAG;AGGACTCCAGTCATATGCAG;AGTACCGAGCTGATGTACGT	-1.78;-1.16;-0.73;-0.69	14500;22297;30921;31949	3.96E-01;5.98E-01;8.15E-01;1.54E+00	45493;46521;55145;62942	7.83E-01;4.62E-01;3.81E-01;3.60E-01
SLC17A5	-0.807898	0.652309	5	GCAACTACGATAGCCCAAAG;AGTGCTCTGAGTACAATGAG;GTAGGGTAAGAAGTACCAAT;CAAGGCAGGCAGATCACCTG;ATATGTTGCCAGCAAAATAG	-1.77;-1.07;-0.73;-0.53;0.06	14565;24003;31090;35879;52855	3.89E-01;5.01E-01;6.35E-01;9.08E-01;8.29E-01	24587;41563;46352;53439;62877	4.63E-01;5.43E-01;4.61E-01;4.54E-01;4.52E-01
SLC17A6	0.263915	0.91786	4	AACAACAGCACCATCCACCG;TGATGGCGATAATGTAGCGG;CTATTACAGATGAAGAACGT;CGGGAGGCTACATCGCGTCT	-0.32;-0.15;0.42;1.11	41726;46733;62030;72624	6.75E-01;4.64E-01;3.88E-01;1.12E-01	4818;15412;30709;35716	6.88E-01;8.17E-01;8.22E-01;1.34E+00
SLC17A7	-0.567149	0.44023	4	TGAGTACTGCACAAGGACCC;GCCGAACACTTCTTCGAAGT;AACAGCACGACCCACCGCGG;GAAACTCATGAACCCCCTCA	-1.45;-1.25;-0.21;0.64	18190;20841;44940;66418	3.76E-01;6.34E-01;4.84E-01;2.67E-01	11024;32502;56601;59252	4.45E-01;4.49E-01;3.76E-01;4.65E-01
SLC17A1	-0.817689	1.05873	16	AGAAGAGCGAGACTTAGACT;CATTGCGGATCGCTAGCTGC;CCAGTTAATACCATAACCTG;TGCGTGCCTGAACCTCACAA;ACAGGATCATCATAAATGAG;AAAGCGCAAGAGGACCCGTA;CTCAAAGATATCAGTGACGA;CATCTACAAAGTGCTAAAGC;ATTGTCTACTTGAACTGACC;AGGACTCCAGTCATATGCAG;AGTACCGAGCTGATGTACGT;TTCCCTTACGAAGCAGACGA;TTTGACATATATTTCAAACT;AAACTATGCAGAGCGGATAG;CTTTGAGCGTATAGCGAGCG;GAAAAACGTAAAACTACCAG	-2.35;-1.89;-1.78;-1.4;-1.16;-1.12;-0.96;-0.85;-0.81;-0.73;-0.69;-0.49;-0.45;-0.0;0.22;1.38	9972;13443;14500;18764;22297;23019;26099;28301;29247;30921;31949;37021;38204;50835;57318;74547	5.84E-01;6.01E-01;6.05E-01;6.49E-01;6.85E-01;7.90E-01;8.54E-01;9.68E-01;1.19E+00;1.41E+00;1.74E+00;1.72E+00;2.13E+00;1.41E+00;1.34E+00;2.65E-01	2895;20124;26607;39238;40421;45493;46521;48195;49141;51343;54423;55145;58678;62942;63999;67470	4.71E-01;9.21E-01;1.02E+00;1.60E+00;1.30E+00;1.33E+00;1.08E+00;9.21E-01;7.80E-01;7.16E-01;6.79E-01;6.72E-01;6.65E-01;6.36E-01;7.98E-01;9.58E-01
SLC17A2	-0.067996	0.674549	4	AGCAGAGTACTGATATACGT;ATACTGACTCTGATCCCAAG;ATGTGACCATCGCCTTTATG;TTATGCACGGGTGATGCATG	-0.83;-0.31;0.42;0.45	28859;41991;61929;62745	4.34E-01;4.32E-01;3.87E-01;3.66E-01	14697;15513;35451;48583	3.94E-01;8.13E-01;6.82E-01;8.10E-01
SLC17A3	-1.26022	0.852672	4	TTATCCATGGATAGGAAACG;ATTGTAACTCGAATAGTCCA;CTATGGTGGCATACTGACAA;TCATTAGTGAAACCCTTGGG	-2.3;-1.3;-0.86;-0.57	10309;20131;28084;34948	4.60E-01;6.54E-01;9.15E-01;1.38E+00	42494;49357;57311;67133	6.95E-01;4.94E-01;3.75E-01;2.48E-01
C16orf58	-0.178555	0.649677	4	CATGGCTGACGTGTCAGCCA;GCCTTCACGGTCAAACCTGA;TGAGGAAGAAGAAACATCCA;AGCCATAATCTCAAGGAACA	-0.76;-0.19;0.1;0.14	30349;45404;54024;55065	4.53E-01;4.52E-01;3.87E-01;5.92E-01	22377;23418;32038;47093	3.81E-01;5.73E-01;7.80E-01;8.64E-01
C16orf59	-0.615934	0.524876	4	AGGGCCAGAAACTAATGGAG;AAGCAGCTTCCCAGAACTCG;AAGGCTGTACGAGTTCGAAG;TCAGACACGAGACCCACCAA	-1.63;-0.51;-0.27;-0.04	15946;36369;43153;49655	3.85E-01;4.29E-01;5.14E-01;7.72E-01	27787;34289;41073;61496	4.22E-01;4.37E-01;5.52E-01;4.01E-01
C16orf52	-0.166369	0.719562	5	GCCGAGGCGGGCAGATCACG;TTGTAGCTTCTCTTCGCCAG;GGCGATGGCGAAGATATCGG;AACCCGGACTGGATCAACAC;ATTTCATTGACTGTCACATG	-1.31;-1.3;0.32;0.68;0.78	20055;20168;59643;67116;68782	4.08E-01;5.62E-01;6.17E-01;4.25E-01;2.57E-01	8660;10326;17799;57274;57387	4.58E-01;9.37E-01;1.14E+00;4.09E-01;6.51E-01
WASIR1	-1.30793	0.586748	1	GCCGAGGCGGGCAGATCACG	-1.31	20055	0.587	57387	0.13
C16orf54	-0.121147	0.620288	4	ACACCAGGGTGGGTGCACGG;GGGCCCCCAGACCGTACTGG;CAGGCGTTCAGCCAACACAG;TGAGGACTGGTATGGCTCTG	-0.69;-0.58;-0.09;0.87	31999;34619;48461;70150	4.76E-01;4.36E-01;4.36E-01;1.72E-01	7292;28981;42823;45443	5.53E-01;4.83E-01;5.19E-01;9.26E-01
ITCH	-0.467731	0.581722	7	GGAATCTCACTCTGTCACCC;AGAAAGGAGTCTTTGGACAG;AATACAAACCTGGTCTACGT;CAAGGCAGGCAGATCACCTG;TCCCGAACATAGGCTATCTG;GAACGGCGGGTTGACAACAT;ATTGTGTAATTCGTGTGTTG	-1.53;-1.05;-0.94;-0.53;-0.52;0.21;1.09	17134;24232;26489;35879;36221;56948;72445	4.62E-01;5.02E-01;5.81E-01;6.03E-01;8.76E-01;5.33E-01;2.03E-01	4997;20494;41221;41563;50953;53210;60308	5.19E-01;5.00E-01;5.98E-01;5.39E-01;5.19E-01;6.37E-01;7.60E-01
CHMP4A	-0.348513	0.517407	4	CAGCAAGCTCCATGGTACGA;TGACGGGACATTATCCACCC;GGGTGATGTCTCATCACACA;AGAGGCGAGCTCGCGATGAG	-1.22;-0.76;0.26;0.32	21386;30375;58150;59794	3.78E-01;4.67E-01;3.75E-01;4.49E-01	17648;19292;47067;56056	3.77E-01;6.78E-01;4.53E-01;5.61E-01
CHMP4B	-0.326702	0.58503	5	CACGGCACCAAAAACAAGCG;CAAGGCAGGCAGATCACCTG;TATCAACCATCGAGTTCCAG;GGGCGGCCCGACCCCCCAGG;GAATGCCAACACCAACACCG	-1.07;-0.53;-0.3;-0.21;0.49	23881;35879;42272;44856;63554	4.52E-01;4.79E-01;4.74E-01;6.26E-01;4.29E-01	13888;32586;35170;41563;53561	3.91E-01;4.63E-01;5.54E-01;7.16E-01;8.01E-01
CHMP4C	-1.65139	0.959882	4	GGTCCGACTTCGGGAGACTG;ACACCAACACTGAGGTGTTG;GCAAGAGATCACAGAGCAAC;AATCCAGAGAGAAATCGCCC	-3.08;-2.44;-1.93;0.85	4697;9330;13134;69781	6.97E-01;1.17E+00;1.79E+00;1.81E-01	7661;64307;68112;72746	5.38E-01;9.24E-01;4.84E-01;1.09E-01
COBLL1	-0.0140833	0.714259	4	TATTTCCAACACCCTGCCGT;TATGCGATGGATGTCAACAG;GTAGTATATGATACAAGCAA;TTAAGTGATACTGTGCACAA	-0.91;-0.55;0.68;0.73	27023;35400;67121;67996	4.14E-01;4.32E-01;4.60E-01;2.26E-01	9446;10321;42042;50419	4.81E-01;1.10E+00;5.34E-01;7.46E-01
TMEM255B	-1.15727	0.704247	4	GACGCCGATGAACTCATAGT;GTAAAACTGGCATCTTCCCG;GTACGATGTCTACCAGACAG;ACGGAGAATGTGACCGTTGG	-2.31;-1.49;-0.8;-0.02	10239;17566;29349;50211	4.61E-01;7.34E-01;8.69E-01;7.53E-01	27231;48093;59876;67195	4.16E-01;4.78E-01;3.77E-01;2.47E-01
TMEM255A	0.296016	1.33634	9	TTTGGGAGGTATCAGCCTGT;GTCCGTGTTAATTCTCACAG;TGGCACCGGTTAGCGTAGAG;AATACTAATGATCCAGGCGT;AAGCATCTCAGGTACAGCGC;AAGGTTCCTCATAACCCTCG;AAGACATCACCAATTTGATA;ACTGTAGGAGGTTATTACCC;GGCGAGTTATTGCTAGCACT	-1.08;-0.94;-0.31;-0.07;0.41;0.56;1.02;1.19;1.88	23677;26393;42039;48997;61734;65071;71917;73376;76230	8.28E-01;6.46E-01;9.11E-01;8.70E-01;1.16E+00;9.19E-01;9.62E-01;5.13E-01;6.16E-02	1212;4066;5525;12371;15708;28445;35403;51049;53765	9.06E-01;1.17E+00;1.71E+00;1.46E+00;1.76E+00;1.28E+00;1.35E+00;9.61E-01;1.43E+00
ST5	-1.27587	0.803535	5	AGCATGGGAAGGTCGCCGAG;GAAGGAGGTAGACCATTACT;TCCTGCCTCAGCCTCCCGAG;CTGTGCCTCTTGGGTAATCG;CGCCCCCAGCTATCGCACGC	-3.0;-2.45;-0.4;-0.26;-0.26	5188;9239;39519;43386;43568	5.95E-01;1.01E+00;4.97E-01;6.64E-01;1.25E+00	33874;34056;37923;68203;72254	6.59E-01;4.68E-01;5.15E-01;4.45E-01;1.51E-01
ST7	-0.815396	0.594219	5	GTTGTAGCTGCTGAGAGCGT;AATAAGCCCTGATATTAGTG;ATATGCTTGTAGTTCCAGAA;CAAGGCAGGCAGATCACCTG;CAATTCTAATTCCAGTAACG	-1.88;-1.4;-0.98;-0.53;0.72	13527;18814;25600;35879;67804	3.92E-01;5.92E-01;7.91E-01;9.08E-01;2.89E-01	9638;41563;51842;58628;63915	4.37E-01;5.43E-01;4.84E-01;3.99E-01;4.17E-01
ZNF304	-0.777873	0.490901	4	TGGAGAGAATTGCTTCAGAG;TCCAGTCTCAGGCAACACCA;CATGAGATATTTCTCCACTG;GTGGGTCACACATCTCACAT	-3.07;-0.75;0.35;0.35	4766;30589;60475;60549	6.91E-01;4.65E-01;3.80E-01;4.27E-01	16893;16967;46853;72691	3.80E-01;7.55E-01;4.56E-01;1.10E-01
STH	-0.511277	0.462375	4	GCCAACCTCAGATGAACTCA;ACAGAACCCTCAGCTTAGCA;GCCGGCCCTCATTGAATGCG;TGAATCATCCACTCACACAG	-1.28;-0.79;-0.21;0.23	20379;29712;45068;57488	3.76E-01;4.74E-01;4.82E-01;5.18E-01	19954;32374;47730;57063	3.75E-01;4.50E-01;4.45E-01;5.30E-01
ZNF302	0.632151	1.5154	4	GTCGTGTAAGGGATGAACCA;AAAAGTGAGAGAATAAATGG;ATATGTGATCATGTTATTGG;TTCACCCCAACCAGTAACAA	-0.73;0.96;1.14;1.17	31005;71176;72885;73135	4.62E-01;1.48E+00;7.07E-01;9.94E-02	4307;4557;6266;46437	7.27E-01;1.74E+00;2.71E+00;8.88E-01
ZNF300	-0.861095	0.608513	5	CAGCATCAGAGAATTCACAC;TGCTCTTATAACAACTCGGT;GGCATAAATATAATCCACTG;AGCTGTGTATGTGTTACATG;AATCTTGAGAAGATTCACAA	-2.92;-0.65;-0.59;-0.2;0.05	5816;32947;34302;45351;52721	5.61E-01;4.64E-01;5.69E-01;6.13E-01;8.35E-01	24721;32091;43140;44495;71615	4.65E-01;4.62E-01;4.70E-01;6.35E-01;1.70E-01
STS	-0.5637	0.496577	5	GGAATCTCACTCTGTCACCC;GGAGGTTACCTGATCGGACA;TCTCACCCAGAGGCTAACGG;AAGTCAACACGGAGTCTACG;GAGAGACTGCAAGCCCGGAG	-1.53;-1.0;-0.6;-0.17;0.47	17134;25292;34282;46031;63264	3.91E-01;4.87E-01;5.70E-01;5.97E-01;4.39E-01	14178;31411;43160;52150;60308	3.90E-01;4.62E-01;4.69E-01;4.74E-01;5.43E-01
HOXB13	-0.632959	0.583471	4	GATAGAAGGCAAACTCAGTG;CGAGCCTGGCAGATCCAAGG;GGCAACAGGGAGTCATGTCG;ACGTCCAGGTAACTGGCCAT	-1.34;-0.67;-0.27;-0.26	19629;32515;43157;43627	3.75E-01;4.49E-01;5.14E-01;9.97E-01	33815;34285;44927;57813	5.05E-01;4.37E-01;4.84E-01;5.08E-01
PPP3CA	-0.772579	0.510028	4	CAGGAACTGTTGGTTCATCA;GCCTTTAAGATATCCACACG;GACCTATGTGTGATATCCTG;TTAGGGGACTATGTTGACAG	-1.84;-1.15;-0.46;0.36	13943;22467;37792;60767	4.01E-01;5.94E-01;6.23E-01;4.21E-01	16675;39650;54975;63499	3.81E-01;4.26E-01;3.82E-01;3.45E-01
PPP3CB	-0.462319	0.525284	5	TGCGCTTAGAATTATCAATG;GACCATAACAAGTCACACAT;CAAGGCAGGCAGATCACCTG;GATGTCAAGCGATGTGTTGG;AAAAGGTATCGTGTATTAGC	-1.46;-0.55;-0.53;-0.3;0.54	17964;35473;35879;42275;64495	3.94E-01;4.76E-01;5.43E-01;6.95E-01;3.97E-01	12947;35167;41563;41969;59478	3.96E-01;4.74E-01;4.79E-01;7.04E-01;5.73E-01
PPP3CC	-2.28248	2.06232	7	CTGCAGGCACAAGTGCGCAT;ATAGACATCTAGGTAATTGG;TCAGCTGCTTTGTCTCAGCA;ATACCCACAACACTGTCCGA;GAGAAACTGCTGGTTTAAGA;GGAATCTCACTCTGTCACCC;CACACAGGTCCAAAGGCGGG	-3.9;-3.47;-3.37;-2.3;-2.01;-1.53;0.61	795;2303;2820;10291;12463;17134;65856	1.17E+00;1.80E+00;2.84E+00;2.15E+00;2.80E+00;3.19E+00;4.93E-01	11586;60308;64979;67151;74616;75139;76646	4.02E-01;2.17E+00;1.86E+00;1.33E+00;1.63E+00;7.60E-01;3.14E-02
LIF	-2.93963	2.49525	4	TGCCAAGGTACACGACTATG;GCGGGAAGTCCGTCACGTTG;TCTGCACTGGAAACATGGGG;ACTTACATAGAGAATAAAGA	-5.23;-3.27;-2.22;-1.04	2;3403;10881;24501	3.99E+00;1.98E+00;2.02E+00;2.00E+00	52941;66564;74037;77440	1.06E+00;1.06E+00;8.13E-01;2.24E-05
RPL12	-1.06426	0.709981	4	TCTTCTGCAGTTAAACACAG;GATAACGTACCAGACCCAGG;ACTGACCATTCAGAACAGAC;GACCCCAACGAGATCAAAGT	-1.84;-1.65;-1.41;0.64	13922;15755;18714;66390	4.01E-01;8.03E-01;1.37E+00;2.67E-01	11052;58727;61687;63518	4.44E-01;6.96E-01;3.86E-01;3.44E-01
IQCJ-SCHIP1	-0.511371	0.782756	14	CAGTAAGACTGAAACCAGCT;GCCGAGGCGGGCAGATCACG;GAGGACGAGCGCGACCAGCG;TGATAGAGACACTACTGAAG;AGATTTGCACTCGGAGCAAG;AGGATGAATCTTCCCAACAG;TCCAAGGGCTGTAGATTGAG;CAAGGCAGGCAGATCACCTG;CATGGCGAGAGTACCTGCAG;AGAGCTGCTCAGCTTCTCTG;GCTGCTTACAAGATCAGCGA;CCAATCCATAGGTGGCACCG;TACAGCTGGTATAAATTCCT;TACGGAACCAGGGCCAGGCG	-2.08;-1.31;-1.2;-0.93;-0.7;-0.58;-0.56;-0.53;-0.5;-0.48;-0.04;0.13;0.63;0.99	11964;20055;21659;26625;31720;34730;35199;35879;36652;37415;49812;54703;66243;71616	6.12E-01;7.76E-01;6.66E-01;6.84E-01;6.96E-01;6.79E-01;7.04E-01;8.17E-01;1.01E+00;1.31E+00;8.90E-01;9.17E-01;5.76E-01;4.75E-01	5826;11199;22739;27630;40027;40790;41563;42243;42712;45722;50817;55783;57387;65478	4.19E-01;5.35E-01;6.96E-01;7.06E-01;9.75E-01;7.92E-01;6.95E-01;6.83E-01;7.66E-01;8.39E-01;8.43E-01;8.57E-01;1.13E+00;1.02E+00
GACAT3	-0.533336	0.334131	1	CAAGGCAGGCAGATCACCTG	-0.53	35879	0.334	41563	0.27
RPL18	-1.96634	1.40977	4	CCGCCATAACAAGGACCGAA;TCAGGAGGTACCCAAACTGA;ACAACCTCTTCAACACAACC;TCCTGGCCGGGAAAACAAGA	-2.37;-2.33;-1.91;-1.25	9816;10133;13284;20836	4.72E-01;1.11E+00;1.78E+00;2.28E+00	56605;64158;67318;67626	1.24E+00;9.17E-01;4.64E-01;2.35E-01
ADRA2A	-0.378227	0.565645	4	ATGATGGCCTTGATGCGGCG;TGGTCGTTGATCTCGCAGCG;TCCAGCGCGTCGGTGTCGCG;GACGAGCACGTTGCCGAACA	-0.92;-0.84;-0.75;1.0	26889;28581;30501;71640	4.13E-01;4.88E-01;8.29E-01;1.35E-01	5802;46941;48861;50553	6.25E-01;4.66E-01;4.31E-01;7.41E-01
ADRA2B	-0.641203	0.50563	4	TGGTCGCCCTTGTAGATGAG;CAGCCCCGACCCGACCATGG;CGGACACTCGAAGTCCACTG;TGGAGTTGTACTCCAGCGCG	-1.53;-0.81;-0.8;0.58	17117;29140;29419;65299	3.79E-01;4.81E-01;8.67E-01;2.96E-01	12143;48023;48302;60325	4.25E-01;4.78E-01;4.37E-01;4.34E-01
ADRA2C	-1.10377	0.609507	4	CTACGCGCGCATCTACCGAG;ACACAGATGCACGATCGACG;TGTACCAGGTCTCGTCGTTG;ATGGTGGCCTTGACGCGGCG	-2.83;-1.49;-0.17;0.07	6525;17640;46036;53202	5.87E-01;7.31E-01;4.68E-01;6.52E-01	24240;31406;59802;70918	3.92E-01;4.58E-01;3.77E-01;1.53E-01
TEX26	-0.570371	0.546396	4	ATGATCTACCGAATTAAGGC;TACCTCACTGTCAACAAACG;AGTCCTCATAGTGGTAGCAT;CTTCGGAATTCAGTGTCTGG	-1.12;-0.72;-0.43;-0.01	23004;31193;38753;50565	3.84E-01;4.59E-01;6.01E-01;7.41E-01	26877;38689;46249;54438	4.13E-01;4.26E-01;4.64E-01;6.12E-01
TEX22	-0.757554	0.571992	5	CGTCGATGCTGACGCTCCAG;GAGAATCGCTTGAATCCGGG;AGCAGGAAACTGTCCCCCCG;AGGGACTGCAGACTCAGGAC;CTGGGCCTGATAGCAGCCTG	-2.07;-1.64;-0.12;-0.03;0.08	12029;15856;47392;50037;53381	4.03E-01;6.76E-01;4.62E-01;5.11E-01;8.08E-01	24061;27405;30050;61585;65404	4.55E-01;4.71E-01;6.60E-01;3.88E-01;3.67E-01
FAM45BP	0.976506	1.43906	2	GTATCACCCCAAGATAGAAG;GTGCACGTAAGAGTGAAGGA	0.77;1.19	68574;73312	6.93E-01;4.76E-02	4130;8868	9.96E-01;1.88E+00
TEX28	-0.917681	0.577257	4	CAGGAGGAGAAGTGTAGGTG;ACAACTTACAGGATAGTGTC;AAGCGACTCTCCAAGATGAA;GGAGTCCTATCACAGCCTAA	-3.73;-0.82;0.15;0.73	1219;29082;55259;68020	1.22E+00;4.82E-01;3.81E-01;2.25E-01	9422;22183;48360;76222	4.82E-01;6.01E-01;4.37E-01;2.76E-02
TEX29	-0.560606	0.622016	4	CCCAGCGATGATCACAATCA;AGCACCCGAGCTCCTGGCAT;TAGTCACAAATGTCATACAG;GTGGCAGCGCGACATCCACA	-2.77;-1.67;0.27;1.92	6969;15578;58363;76311	5.67E-01;8.10E-01;3.75E-01;2.55E-02	1131;19079;61864;70461	1.25E+00;6.84E-01;3.87E-01;1.64E-01
SYT8	0.446618	1.20443	4	AGACGCTGACCCGGGCATAG;AGCAGGTCTCGTCAAACACG;AATAAGCCCAGGTATAGCTG;TCAACTTCAAGCGCTTCTCG	0.0;0.33;0.51;0.94	51211;59985;64061;70981	9.88E-01;7.38E-01;4.08E-01;1.51E-01	6461;13381;17457;26452	5.90E-01;9.12E-01;1.45E+00;1.87E+00
SYT9	-1.22169	0.643938	4	AACCAGAGTTATATAAGCAG;AAAAACACTTCATCAAACAC;CATTACTGACCGGGCCGACG;ACCACAGGCAGTGACCACAA	-3.08;-1.87;-0.18;0.25	4653;13660;45794;57828	7.00E-01;8.97E-01;4.71E-01;5.07E-01	19614;31648;63782;72789	3.75E-01;4.55E-01;4.04E-01;1.08E-01
LINC01250	-1.03094	0.565474	2	GGAATCTCACTCTGTCACCC;CAAGGCAGGCAGATCACCTG	-1.53;-0.53	17134;35879	4.63E-01;6.68E-01	41563;60308	3.03E-01;2.17E-01
MTCH2	-0.71404	0.669494	7	GGAATCTCACTCTGTCACCC;AGCACTTTCACGTACATGAG;GCCGAGGCGGGCAGATCACG;CAAGGCAGGCAGATCACCTG;TTACCATAACTAAAGAGACC;ACTGCAAACATACCATGGAA;CATTACCAGGAGAGTGACAA	-1.53;-1.46;-1.31;-0.53;-0.35;-0.17;0.35	17134;17954;20055;35879;41038;46098;60456	4.62E-01;5.20E-01;7.37E-01;6.03E-01;7.12E-01;8.99E-01;7.53E-01	16986;31344;36404;41563;57387;59488;60308	4.59E-01;5.90E-01;5.43E-01;5.39E-01;5.02E-01;4.77E-01;7.60E-01
MTCH1	-0.374341	0.49324	4	TACCCCGAGTCACAGTAGAG;TGGGACGGGAGGCCAAGTAC;CTGCATCATCATCTCGTAGG;TGCCACGAAAAGAGCCTCAG	-1.04;-0.82;-0.26;0.62	24482;28929;43538;66094	3.93E-01;4.83E-01;5.07E-01;2.75E-01	11348;33904;48513;52960	4.38E-01;4.40E-01;4.35E-01;6.60E-01
LINC01254	-1.40634	0.616874	1	TCGCCCAAGCTAGAGTGCAG	-1.41	18711	0.617	58730	0.12
SYT1	-1.07324	0.996388	7	GTACCATACTCGGAATTGGG;GGAATCTCACTCTGTCACCC;CACGCCATTCCTCAGTTACA;GCCGAGGCGGGCAGATCACG;CTGCCCGCCTTGGACATGGG;CAAGGCAGGCAGATCACCTG;TGTTTCTTTCAGTGCCACCG	-1.96;-1.53;-1.32;-1.31;-0.65;-0.53;-0.21	12830;17134;19882;20055;32881;35879;44980	4.08E-01;5.31E-01;7.43E-01;1.19E+00;1.02E+00;1.43E+00;1.65E+00	32462;41563;44561;57387;57560;60308;64612	9.48E-01;8.89E-01;6.64E-01;7.37E-01;5.03E-01;4.62E-01;5.51E-01
SYT2	-0.128271	0.729453	5	AACATGAAGGACATGAAAGG;CAAGGCAGGCAGATCACCTG;GACAACTCCACTGAGAGTGG;GCAATGGCGATCAGTGCCCA;AATATGAGACCAAAGTCCAT	-0.61;-0.53;0.03;0.05;0.43	34043;35879;51960;52553;62148	6.64E-01;4.79E-01;4.85E-01;4.67E-01;4.78E-01	15294;24889;25483;41563;43399	3.88E-01;4.91E-01;7.95E-01;7.16E-01;1.26E+00
SYT3	0.0954252	1.00499	8	GCAGGTCATTGCAGAGTACG;CGAGCCATAGAGGTACCGCA;TTAAGCCAGAGCTGTACCAG;GCCGCAGGTACTGCTTTCTA;AGAACATGAACGTCATCTGT;CCTGGAGGCCCAGTTACCAG;GGGCCTAGGTCTTTGCGCAG;ATACGAGTCCATGTCCAAGT	-1.23;-0.87;-0.15;-0.01;0.13;0.54;1.02;1.33	21135;27827;46722;50561;54918;64644;71859;74281	6.30E-01;6.02E-01;9.18E-01;7.34E-01;6.07E-01;5.87E-01;4.66E-01;1.45E-01	3161;5583;12798;22524;26881;30720;49615;56307	6.13E-01;1.03E+00;9.90E-01;8.97E-01;1.10E+00;1.40E+00;8.95E-01;1.11E+00
SYT4	0.104478	0.853125	4	GATAATTCAATTCCCGAGAG;AGAGAGAGACTGTGAAGACC;GAAGAGAAACAAGAGAAGCT;ACATGCACAAACTTGTATGG	-1.92;-0.43;-0.41;3.18	13239;38688;39268;77272	4.09E-01;4.26E-01;5.90E-01;3.80E-03	170;38174;38754;64200	2.06E+00;4.26E-01;6.01E-01;3.26E-01
SYT5	-0.864874	0.640447	4	GGGCCAGAGTTACATAGACA;GAGGCCTGAGACCAGCACGA;CTCTCGCAATGACGCCATCG;TCCCGGCCGTGGGGACATAG	-1.53;-1.31;-1.29;0.68	17086;19969;20233;67199	3.79E-01;6.58E-01;1.28E+00;2.46E-01	10243;57209;57473;60356	4.61E-01;6.51E-01;3.75E-01;4.33E-01
SYT6	-0.357354	0.796549	4	ATATTGGATATCCTTCCAGA;CGGTCTCGTAATCGTAGCGT;CCTCGCCAATCATGTCATGG;TGAGGTGCAGATGTCGGTCA	-3.34;0.38;0.61;0.91	3032;61080;65927;70625	8.57E-01;7.78E-01;4.35E-01;1.60E-01	6817;11515;16362;74414	5.73E-01;1.02E+00;1.53E+00;6.93E-02
SYT7	-0.461547	0.483745	4	CACTAGACTCACCTTCAAAG;GTCCATCCCCCTTAACAAGG;GGTGTCAGCGCAAACTGGTG;CCCACGATGAGTCCGACCGC	-1.07;-0.69;-0.25;0.17	23883;31913;43785;55856	3.89E-01;4.53E-01;5.03E-01;5.68E-01	21586;33657;45528;53559	3.78E-01;4.41E-01;4.75E-01;6.41E-01
TIAL1	-0.863645	0.624693	4	AATGCGATTGTGCATATGGG;AAGCTGTAAAATGATAACAG;ACTGTGGAGGAATTGCGTCT;TTAGGAGGTCAAAGTAAACT	-2.25;-0.5;-0.44;-0.27	10681;36890;38323;43345	4.52E-01;4.28E-01;6.11E-01;1.01E+00	34097;39119;40552;66761	5.10E-01;4.26E-01;5.63E-01;2.58E-01
FUBP3	-2.24346	1.64214	5	CATGCTGACACCGATCCGGA;TACTCCGTATCCATATACTG;ACGGTGCCAGCCGATAAGTG;AAAGACCAAGCTGACTTTCG;CAAGGCAGGCAGATCACCTG	-3.86;-2.74;-2.17;-1.91;-0.53	907;7174;11248;13296;35879	1.25E+00;1.19E+00;1.65E+00;2.44E+00;1.67E+00	41563;64146;66194;70255;76536	9.08E-01;1.46E+00;8.80E-01;5.03E-01;2.55E-02
FUBP1	-0.447579	0.494105	4	CAAAAATTGGAGGTGATGCA;ATGATGGGACAACACCCGAA;GAGAAGTTCGGAATGAGTAT;TGATTGTAACAGGAACGGGC	-1.07;-0.56;-0.42;0.25	24010;35245;39054;57976	3.90E-01;4.33E-01;5.95E-01;5.03E-01	19466;38388;42197;53432	3.75E-01;4.26E-01;5.31E-01;6.45E-01
SCHIP1	-0.503837	0.608536	10	CAGTAAGACTGAAACCAGCT;GCCGAGGCGGGCAGATCACG;GAGGACGAGCGCGACCAGCG;TGATAGAGACACTACTGAAG;AGATTTGCACTCGGAGCAAG;CAAGGCAGGCAGATCACCTG;GCTGCTTACAAGATCAGCGA;CCAATCCATAGGTGGCACCG;TACAGCTGGTATAAATTCCT;TACGGAACCAGGGCCAGGCG	-2.08;-1.31;-1.2;-0.93;-0.7;-0.53;-0.04;0.13;0.63;0.99	11964;20055;21659;26625;31720;35879;49812;54703;66243;71616	4.67E-01;5.62E-01;5.78E-01;6.30E-01;6.81E-01;7.64E-01;6.05E-01;6.19E-01;4.50E-01;3.40E-01	5826;11199;22739;27630;41563;45722;50817;55783;57387;65478	4.29E-01;5.69E-01;5.74E-01;6.18E-01;6.21E-01;6.01E-01;5.93E-01;5.93E-01;7.58E-01;7.29E-01
MARCO	0.418839	1.12608	4	GGTGAACTTCTCCCTAGCTG;ACCTGGCTCAGGGTGCATCG;CAGCCGCCAGAGTGTCATTG;GACAACTTCACTCAGAACCC	-0.14;0.24;0.52;1.05	47008;57688;64210;72169	8.32E-01;6.64E-01;4.09E-01;1.22E-01	5273;13232;19754;30434	6.57E-01;9.19E-01;1.31E+00;1.62E+00
SAP30	0.22668	1.07364	5	GGAATCTCACTCTGTCACCC;GCAGGCAGCACAGTTGCCCG;TGGTGAGCGGTGCGGCCGGG;GGCCGCGGCAGCGACCACTG;GGGGTATCAATATCTTGAAC	-1.53;0.15;0.43;0.92;1.17	17134;55331;62158;70708;73139	3.91E-01;9.25E-01;6.96E-01;5.20E-01;1.24E-01	4303;6734;15284;22111;60308	6.56E-01;1.24E+00;1.31E+00;1.62E+00;5.43E-01
NBL1	-0.74688	0.683645	8	AAGAACATCACCCAGATCGT;AGTGCCAGCTTGTTGATGGG;ACAGTGAACCAGGGACTCTG;CAGCCAGTAGCATGGCAGGG;GGGCAGCCAGTAGCATGGCA;ACCAGGGACTCTGTGGACTG;AACAGTGCCAGCTTGTTGAT;AGTACTCACAATCTCCCACA	-3.22;-1.37;-0.82;-0.71;-0.69;-0.47;-0.28;1.59	3690;19149;29094;31450;32002;37596;42790;75430	5.67E-01;5.07E-01;5.50E-01;6.25E-01;8.65E-01;1.01E+00;1.25E+00;9.14E-02	2012;34652;39845;45440;45992;48349;58293;73747	7.62E-01;7.97E-01;6.87E-01;6.16E-01;5.57E-01;6.31E-01;5.67E-01;1.70E-01
C3orf67-AS1	-1.48765	0.926269	5	TTTCCATGAGGTGCTGATCG;ACAGATCAGTTCATTAACAG;CCTGATTGATCAGGAGACTG;ATGAAGATATCCAGCGAGGT;GCAGGTCTCCTGTTACTCAG	-3.27;-2.9;-2.32;0.52;0.53	3397;5932;10185;64195;64420	7.37E-01;1.34E+00;1.77E+00;3.94E-01;4.00E-01	13022;13247;67257;71504;74054	3.95E-01;7.78E-01;9.46E-01;5.55E-01;9.71E-02
HSFX2	-0.0998788	0.826483	8	GAGGGGACAGGATCATGGCT;TCCACAGTTTCTGTGGAAAG;GAAGCTCTTTATCGAAGTTG;TTCTCTTCATCCTCACGAGG;CCACTGGGAGCCCTAACTTG;GTCTCCGAATGAGAATGACC;CCTCAAGTTAGGGCTCCCAG;TAGGTCTCTGACTGCAACTG	-2.0;-0.62;-0.39;-0.18;-0.01;0.44;0.81;1.15	12533;33773;39786;45741;50686;62539;69255;72958	4.25E-01;7.66E-01;6.85E-01;6.21E-01;5.57E-01;5.41E-01;4.12E-01;2.07E-01	4484;8187;14903;26756;31701;37657;43669;64902	5.16E-01;7.96E-01;8.63E-01;7.37E-01;8.77E-01;1.01E+00;1.20E+00;6.14E-01
HSFX1	0.171727	1.05539	7	TCCACAGTTTCTGTGGAAAG;GAAGCTCTTTATCGAAGTTG;TTCTCTTCATCCTCACGAGG;CCACTGGGAGCCCTAACTTG;GTCTCCGAATGAGAATGACC;CCTCAAGTTAGGGCTCCCAG;TAGGTCTCTGACTGCAACTG	-0.62;-0.39;-0.18;-0.01;0.44;0.81;1.15	33773;39786;45741;50686;62539;69255;72958	1.01E+00;8.22E-01;6.94E-01;5.77E-01;5.73E-01;4.22E-01;1.81E-01	4484;8187;14903;26756;31701;37657;43669	5.48E-01;8.72E-01;9.74E-01;8.54E-01;1.07E+00;1.32E+00;1.74E+00
DRC7	-1.11262	0.69318	4	TTTCATAAAACTCAATGACA;GTATACCATCAAACCCCCCA;GCCCCGTACCTCAATAGCAA;GCATGTACTCCCATCTCACA	-2.75;-0.84;-0.6;-0.27	7077;28669;34290;43276	5.62E-01;4.87E-01;7.13E-01;1.01E+00	34166;43152;48773;70365	5.12E-01;4.37E-01;4.32E-01;1.66E-01
DRC3	-0.342626	0.582685	4	TGGTCAGAAAAAGCTTGCGG;ACTCCGAAAGTCCAGCTGCA;ATGTACGCTGAGGACTCAGA;CTCTAGGAACCCTATCTCTG	-0.7;-0.43;-0.36;0.12	31822;38609;40644;54542	4.74E-01;4.26E-01;5.61E-01;6.09E-01	22900;36798;38833;45620	3.84E-01;4.28E-01;6.00E-01;9.19E-01
DRC1	-1.06353	0.676186	4	TGTGATGAAAACCTTTCGTG;GTTGGTGACAAATATCCAGG;GTAGGACTCTGGTTCCGCGG;CTGCGCGCTTAGAAGCCCGG	-2.77;-2.76;-0.61;1.88	6970;7038;33943;76229	5.67E-01;1.39E+00;7.23E-01;2.74E-02	1213;43499;70405;70462	1.22E+00;4.39E-01;5.64E-01;1.64E-01
C1orf53	-1.16562	0.655212	4	ACCCTCTGCCCTGCTAACGA;GAGCGAAGAGTTAACCGCGG;CTTACCCAGAGAGGTGCTGG;AGGGAGTCTCACCGCGCAGG	-3.21;-0.97;-0.78;0.3	3768;25779;29886;59221	7.76E-01;5.29E-01;8.50E-01;4.66E-01	18221;47556;51663;73678	3.76E-01;4.72E-01;4.03E-01;8.65E-02
C1orf52	-1.39243	0.855397	4	GATCCGGCGAAGTCGGCGGG;GCTTGCTTAACAGCCTCCAA;TCAGTGGTGTAGGTCTCAGG;GATGTTATCCTCCTCGTCCG	-3.86;-1.48;-1.22;0.99	918;17683;21397;71531	1.34E+00;7.30E-01;1.21E+00;1.38E-01	5911;56045;59759;76523	6.19E-01;6.20E-01;3.77E-01;2.07E-02
C1orf50	-0.601565	0.65719	5	CGAGCGCCACGAGGTCTAAG;CAAGGCAGGCAGATCACCTG;TGTAATATAGTGAAAAAACC;TATCTCTATAAACGGGAGAG;TTTGCAAGAACAAGCCAGGA	-1.42;-0.53;-0.5;-0.43;-0.13	18538;35879;36887;38818;47127	3.97E-01;4.79E-01;5.28E-01;8.03E-01;1.08E+00	30315;38624;40555;41563;58904	5.71E-01;5.04E-01;4.87E-01;7.16E-01;5.94E-01
C1orf56	-0.473955	0.613288	4	GAAGACAAGGATAATCCTAG;CGGGTCAGTTTACGCTTTGG;CAGTGCGACTCCCAATACAG;CCGGTCGTCCGCCATTAACG	-2.17;-1.51;0.71;1.07	11284;17381;67655;72307	4.40E-01;7.40E-01;4.72E-01;1.19E-01	5135;9787;60061;66158	6.66E-01;1.14E+00;3.78E-01;2.74E-01
C1orf54	-0.486379	0.515347	4	CATGTACTCACCATAACTGG;AGAGGATGAATATTATCAGG;GTGGACTTACCCAGGATAAG;CTACTGAGGGTAGAACAGGT	-0.9;-0.84;-0.31;0.1	27337;28516;42155;54079	4.17E-01;4.88E-01;5.32E-01;6.24E-01	23363;35288;48926;50105	3.86E-01;4.33E-01;4.30E-01;7.56E-01
2018-03-01	-0.297095	0.556309	5	GAGAATCGCTTGAATCCGGG;GAAGCTGGTTATCCACTGGG;CCGCCAGCGACGCCTCAGAA;TCTCAGTGCAGCCTACACAA;AACAAGTCTGCTATTTGATG	-1.64;-0.71;-0.28;0.0;1.15	15856;31399;42896;50982;72982	3.88E-01;4.62E-01;4.71E-01;4.94E-01;1.29E-01	4460;26225;34546;46043;61585	6.44E-01;4.79E-01;5.65E-01;5.96E-01;4.97E-01
2018-03-02	-0.642888	0.462296	4	GAGCGGGCAGTAGTCTGGGT;CAATTTGAGACAAACATGAA;AGTCTCTGCCTTTAATGTCA;ATGGAGATGAGCACGAGGCG	-1.87;-0.69;-0.38;0.37	13664;31961;40073;60833	4.04E-01;4.53E-01;5.73E-01;4.19E-01	16609;37369;45481;63778	3.81E-01;4.27E-01;4.76E-01;3.37E-01
LOC102724345	-0.399969	0.310068	1	TCCTGCCTCAGCCTCCCGAG	-0.4	39519	0.292	37923	0.31
OR7E96P	-0.352701	0.451647	2	CATCTTGGGAACCATGGCCG;GATCCTCTGAGAGTCCCAGG	-0.44;-0.27	38453;43334	3.01E-01;5.04E-01	34108;38989	3.07E-01;5.96E-01
SMPD4	-1.28916	1.0411	10	TGGGCAGAGACACGGCCGCA;CGCGCTCATGGTGTTCCGAG;GAGAGATGTGTCGCTTTAGG;GTGACCAACCTACCTACCCA;CCCGGCAGAAGCTGGCGCTG;GAAGAAGGTGCTGAGCACCG;CCCCGCTCACTTGAACACGT;TCAGGGCCAAGTTCAGACCA;GGAGCTGTACGAGCTGGCGC;CCGCTCACTTGAACACGTCG	-4.45;-2.35;-2.2;-1.95;-1.22;-0.61;-0.36;-0.13;0.0;0.38	113;9965;11026;12954;21304;33935;40720;47171;51289;61074	1.84E+00;6.06E-01;9.27E-01;1.26E+00;1.10E+00;8.29E-01;8.47E-01;8.85E-01;1.08E+00;1.03E+00	16368;26153;30271;36722;43507;56138;64488;66409;67477;77329	6.03E-01;7.21E-01;6.52E-01;6.49E-01;6.42E-01;7.58E-01;8.07E-01;5.73E-01;4.29E-01;6.29E-03
SMPD1	-0.592262	0.453531	4	GAACCCAATGTGGCTCGCGT;AATTCATATTGAGAGAGATG;GGGGGAGGGAAGCTATTGAC;CTGGTGCCAGACATCATGTG	-1.65;-0.75;-0.39;0.42	15765;30500;39807;62084	3.86E-01;4.66E-01;5.78E-01;3.84E-01	15358;37635;46942;61677	3.89E-01;4.27E-01;4.55E-01;3.95E-01
SMPD3	-1.36281	0.77863	5	TATTCACGGCTGGAAGACAA;CCGCTGGCGCTTCTCGTAGG;GCCGAGGCGGGCAGATCACG;CGACGAGGCCTTCGACCATG;GAGTACATCCTGTACGACGT	-3.41;-2.32;-1.31;-0.25;0.47	2628;10198;20055;43729;63170	8.30E-01;9.45E-01;1.02E+00;6.55E-01;4.42E-01	14272;33713;57387;67244;74814	3.89E-01;4.67E-01;5.64E-01;4.27E-01;7.49E-02
SMPD2	-0.970753	0.562295	4	CATCTACCTAGCACATCGTG;TGTAAAGCACGTAGTCAATG;CAGCTGCACACCACTTCCGG;ACAGGCTTTGACCCTCACAG	-2.18;-1.96;-0.52;0.78	11164;12857;36159;68835	4.42E-01;9.39E-01;6.63E-01;2.05E-01	8607;41283;64593;66278	5.06E-01;4.30E-01;4.14E-01;2.70E-01
BRIP1	-1.39392	0.975838	6	AGATGAAGCTCATAACATCG;CACAGAGATTCCGACCCTTG;GCCGAGGCGGGCAGATCACG;TATGACGCAATCAAATACAA;CAAGGCAGGCAGATCACCTG;AGTTACCGACTACCTCAGGA	-3.88;-1.96;-1.31;-0.65;-0.53;-0.04	854;12899;20055;32983;35879;49749	1.20E+00;6.97E-01;8.50E-01;7.89E-01;1.16E+00;1.15E+00	27693;41563;44459;57387;64543;76587	6.29E-01;7.01E-01;5.34E-01;5.18E-01;3.96E-01;2.89E-02
PDE11A	-0.611922	0.582203	5	ATGGCAAGTTCTGACACCAG;CCCTGAGTAGTGTACGACGG;AATGCAAAGTCCTACCTGGT;AGAAATCATCATACTCCGAC;GAATAGTCCATCGCAGAGCA	-3.63;-0.18;-0.04;0.24;0.55	1589;45788;49860;57723;64768	1.02E+00;6.22E-01;4.70E-01;4.06E-01;3.88E-01	12674;19719;27582;31654;75854	3.98E-01;5.71E-01;7.27E-01;1.08E+00;4.50E-02
TTC28	-0.240945	0.761605	7	GATGAACAACAAACTCAACT;GGAATCTCACTCTGTCACCC;GCCGAGGCGGGCAGATCACG;CAAGGCAGGCAGATCACCTG;ACCAGGCGGTCAAATACCAT;TTCTAGGCATACTTCCGACA;GCAGTGCCTATCACTACCGG	-3.12;-1.53;-1.31;-0.53;0.28;0.31;4.21	4364;17134;20055;35879;58659;59582;77392	5.55E-01;5.31E-01;7.37E-01;6.03E-01;5.11E-01;4.75E-01;1.92E-03	50;17860;18783;41563;57387;60308;73080	2.35E+00;5.21E-01;7.84E-01;5.39E-01;5.02E-01;4.62E-01;1.76E-01
TTC29	0.678567	1.48227	4	CTACAAGAAGAATATCTGTG;CTGAAATAGCCAAAGAAGGT;GCATATGGGTCTTCTCTACG;CCTGTACCATTACCTGACCA	0.24;0.48;0.52;1.48	57584;63354;64152;75013	1.30E+00;8.77E-01;4.09E-01;5.53E-02	2429;13290;14088;19858	9.43E-01;9.16E-01;1.71E+00;2.36E+00
TTC24	-1.48263	0.795831	4	CGGCGACCAATGTTTCAATG;CTCCAAGGCCCCACAAACCA;CAGCTGTCTCTCTTGAGCAT;AGCTTCCTGATAGTTGCCGA	-3.36;-2.76;-0.6;0.79	2918;7023;34071;68915	8.72E-01;1.39E+00;7.19E-01;2.03E-01	8527;43371;70421;74529	5.08E-01;4.39E-01;5.64E-01;6.66E-02
TTC25	-0.880066	0.522539	4	GCAGAAGCCGATCTACGCCA;AGCACTTTGAGCGAGCAACC;GCCTCGATGATAGAATACCA;TTCCCCACAGACCTGATCAA	-2.67;-0.86;-0.1;0.1	7742;28140;48220;54101	5.35E-01;4.93E-01;4.38E-01;6.23E-01	23341;29222;49302;69707	3.86E-01;4.80E-01;4.26E-01;1.83E-01
TTC26	-0.791349	0.455922	4	TTTCAGATACAATACCAGGG;TCAGGAATGACATCAACTAG;GAAGTTCAAACGTCATGTTG;TACTATCAGGAATTTGCTGA	-3.12;-0.77;-0.06;0.79	4347;30070;49095;68977	7.24E-01;4.70E-01;4.28E-01;2.01E-01	8465;28347;47372;73103	5.10E-01;4.91E-01;4.49E-01;1.00E-01
TTC27	-1.65814	1.34101	8	GCCGAGTGGAACGGGCAATG;GGTTAAGATTAATCCCATGC;ACTGATTCTAGATGTAAGAA;GGAATCTCACTCTGTCACCC;TCGCCCAAGCTAGAGTGCAG;GCCGAGGCGGGCAGATCACG;TCCTGCCTCAGCCTCCCGAG;CTGAGGGTGTAAGTCAACAG	-3.47;-3.1;-2.91;-1.53;-1.41;-1.31;-0.4;0.87	2281;4490;5848;17134;18711;20055;39519;70087	7.19E-01;1.18E+00;1.79E+00;1.21E+00;1.70E+00;2.33E+00;1.45E+00;3.47E-01	7355;37923;57387;58730;60308;71599;72945;75161	4.23E-01;9.26E-01;1.58E+00;1.10E+00;7.60E-01;1.00E+00;5.15E-01;1.04E-01
PATL2	-0.605846	0.478399	4	GGTAACGCCTTACATTCCGA;CCCTCGCCGAGCTATTGATG;AAACCAGTACCTGAACCTAG;TGACATTCCCAGCATACCAG	-2.58;-1.15;0.24;1.07	8406;22470;57811;72287	5.12E-01;5.94E-01;3.75E-01;1.20E-01	5155;19631;54972;69038	6.64E-01;6.68E-01;3.82E-01;2.00E-01
TTC22	0.182607	0.873857	4	CCTTGCCGAAGCAGTCTAGA;GCGCTCTACGACAAGGCGCT;GGCCCGCGAGTGCTTCCTCG;CTGGCAGGCGTACTGCACAA	-1.17;0.02;0.75;1.12	22231;51933;68343;72776	3.81E-01;5.33E-01;4.91E-01;1.08E-01	4666;9099;25509;55211	6.99E-01;1.19E+00;1.02E+00;5.88E-01
PATL1	-0.475164	0.505462	5	GGAATCTCACTCTGTCACCC;TGTGTCCGGTCTAAACATTG;CTGAACGAGCATTACCAAGG;GAAGTTCTGAGGCGAATCCG;CCATAGGGAGCAGGATAACG	-1.53;-1.48;-0.56;0.11;1.08	17134;17716;35205;54413;72389	3.91E-01;6.20E-01;5.54E-01;4.41E-01;1.46E-01	5053;23029;42237;59726;60308	6.04E-01;5.13E-01;4.75E-01;3.93E-01;5.43E-01
ENO1	-1.86702	1.23667	5	ACAGCAGCTCTGAAGAGACC;GGTCATCGGCATGGACGTAG;GGAAAGATGCCACCAATGTG;GGAATCTCACTCTGTCACCC;AGGTCCTACCTTGCTAACCA	-3.1;-2.92;-2.11;-1.53;0.32	4537;5827;11689;17134;59829	6.38E-01;1.35E+00;1.61E+00;2.03E+00;5.60E-01	17613;60308;65753;71626;72899	3.92E-01;1.18E+00;8.56E-01;5.61E-01;1.31E-01
ENO2	-0.829743	0.620798	5	GCCATCACGATAAAACTCTG;GAGAATCGCTTGAATCCGGG;ACTGTTCTCCAGGATATTGG;GGCCTCATAGATGCCCGTAG;TCCTTCCCGATACATCACTG	-1.83;-1.64;-0.41;-0.37;0.1	14031;15856;39335;40371;53906	3.90E-01;6.76E-01;4.99E-01;7.53E-01;7.87E-01	23536;37071;38107;61585;63410	4.48E-01;4.89E-01;5.12E-01;3.88E-01;4.34E-01
ENO3	-1.08796	0.660402	4	CAGAGCCTCATAGATACCCG;TCCCAGCGAGATCTGCGATG;TCCCGCACGGCACATCACTG;CTTCCAGAAACTAAGCGTTG	-2.32;-1.6;-1.18;0.75	10158;16352;22059;68232	4.63E-01;7.79E-01;1.18E+00;2.20E-01	9210;55383;61090;67291	4.88E-01;6.04E-01;3.82E-01;2.44E-01
ENO4	-0.444579	0.592437	5	GAGACAAAAAAAGGGCACGA;GCCGAGGCGGGCAGATCACG;CCTGTTGAGCCTGTACTCAG;CAGAGGTGGATCACCTACTC;AAGACGTACTAGATGGACTG	-2.45;-1.31;0.11;0.69;0.73	9300;20055;54253;67408;67964	4.44E-01;5.64E-01;5.11E-01;4.30E-01;2.83E-01	9478;10034;23189;57387;68144	4.40E-01;9.56E-01;8.80E-01;4.08E-01;2.78E-01
RCN1P1	-1.3778	0.608438	1	GACCTTCGACCAGCTCACCC	-1.38	19078	0.608	58364	0.123
LOC728613	-3.22153	1.32147	1	AGGGTCGATAAAGACAGGAG	-3.22	3694	1.32	73751	0.0212
ANKFY1	-0.422917	0.605784	7	GGAATCTCACTCTGTCACCC;CCGACACGCTGTGTGCAACG;TTAGAACTCAAAGACCACGA;CAAGGCAGGCAGATCACCTG;TCCTGCCTCAGCCTCCCGAG;AGCTTTGTGACTAACCAGCG;CATATGGCATCAACTACGAG	-1.53;-0.86;-0.54;-0.53;-0.4;0.08;0.83	17134;28082;35625;35879;39519;53485;69514	4.62E-01;5.37E-01;5.38E-01;6.03E-01;7.59E-01;6.29E-01;3.28E-01	7928;23957;37923;41563;41817;49360;60308	4.26E-01;5.01E-01;5.55E-01;5.39E-01;6.90E-01;7.69E-01;7.60E-01
OBSCN	-1.12976	0.612381	4	TGCCGGGGAGTATAGCTGCG;ACACACACACGAGTACTCCG;AGAAGATGTGAGAAATCACG;CAGCTCGAAAGTGCGCATGG	-2.8;-2.6;0.16;0.72	6724;8279;55615;67815	5.78E-01;1.26E+00;3.79E-01;2.31E-01	9627;21827;69171;70719	4.76E-01;6.09E-01;5.17E-01;1.58E-01
SRRD	-1.63632	0.959341	4	GTTTCTAGCTACGATGCAGG;GCATCTTGACTCATTGCCAG;AGGGAAACGGAGTATTCGCG;GCGGAGTTCGAGTCTGACAG	-3.52;-1.73;-1.63;0.34	2058;14899;15968;60311	1.01E+00;8.39E-01;1.56E+00;4.34E-01	17131;61474;62543;75384	3.79E-01;7.94E-01;3.92E-01;4.68E-02
MCL1	-0.454432	0.47955	4	AGGCGCTGGAGACCTTACGA;AGTCGCTGGAGATTATCTCT;CCAAAAGTCGCCCTCCCGGG;GTAATAACACCAGTACGGAC	-1.63;-0.94;0.3;0.45	16041;26369;59272;62704	3.84E-01;5.19E-01;3.76E-01;3.67E-01	14738;18170;51073;61401	3.94E-01;7.13E-01;4.08E-01;4.03E-01
SORBS1	-0.878516	0.566861	5	AGTGAAGAGGGAATCAGACG;TCGCCCAAGCTAGAGTGCAG;TACTCGAAACAGCTCCCGTG;GTGCTCTTGCAACACAATCG;ACCTGGTTAATACTGACAGA	-2.37;-1.41;-1.09;-0.25;0.74	9808;18711;23453;43643;68086	4.34E-01;5.94E-01;8.70E-01;6.57E-01;2.80E-01	9356;33799;53988;58730;67634	4.43E-01;4.67E-01;5.08E-01;3.98E-01;2.94E-01
SORBS3	0.214679	0.915589	4	TTCTAGGTAACTCTTCAGAG;GCCAGGTCTGATACCACGCA;AAGCGCTGGGTCAAGTACGA;TCACCTCCACATAATTAGCA	-0.45;0.11;0.49;0.71	38173;54227;63570;67697	5.90E-01;5.78E-01;4.02E-01;2.34E-01	9745;13872;23215;39269	4.73E-01;8.87E-01;1.12E+00;1.18E+00
SORBS2	-0.729413	0.499208	6	AGTAATCTAACTCACTGGAG;GGAATCTCACTCTGTCACCC;AGCCAGACACGAAAACACCG;CAAGGCAGGCAGATCACCTG;TCAAAGCCCCGCATTACCCA;CCCGGACCCGAAAGTCAAGT	-2.75;-1.53;-0.66;-0.53;0.17;0.93	7115;17134;32623;35879;55838;70804	4.68E-01;5.69E-01;5.38E-01;7.01E-01;4.87E-01;2.33E-01	6638;21604;41563;44819;60308;70327	4.83E-01;5.01E-01;5.12E-01;5.25E-01;4.20E-01;2.51E-01
ODC1	-1.01522	0.769409	4	ATGTATCTGCTTGATATTGG;GAAGGGGCTTTACATGTGCG;CTGCACGAAGGTCTCAGGAT;CAACGCTGGGTTGATTACGC	-1.59;-1.14;-1.03;-0.3	16437;22690;24690;42255	3.82E-01;5.89E-01;1.05E+00;1.05E+00	35187;52752;54752;61005	5.30E-01;5.48E-01;3.83E-01;4.14E-01
IL18RAP	-1.00258	0.55897	4	TGAAGTTTATGACTATCACC;TTGGTGAGAGTCGATTTCTG;TCACAGGATGCATTTGTCTG;TCTAATGGATCTCCATTCGA	-3.01;-0.95;-0.24;0.18	5167;26303;43996;56335	6.64E-01;5.20E-01;4.99E-01;5.53E-01	21107;33446;51139;72269	3.77E-01;4.42E-01;4.08E-01;1.20E-01
EOMES	-0.315751	0.519879	4	CCTCTACGAACACATTGTAG;GCTTAGTGACACCGACGCCG;ACTTCAACAATATGCAGTCG;CTCACTCTTCCCGTACCAGG	-1.2;-0.36;-0.11;0.41	21665;40667;47788;61799	3.79E-01;4.28E-01;4.44E-01;3.92E-01	15643;29654;36775;55777	3.87E-01;4.75E-01;6.48E-01;5.70E-01
BCDIN3D-AS1	1.3068	1.36927	1	CTGGATCTATGTCGCAGCAG	1.31	74133	0.019	3309	1.37
KCTD21-AS1	-1.64118	0.688777	1	GAGAATCGCTTGAATCCGGG	-1.64	15856	0.689	61585	0.0995
CGB1	-0.84122	0.879	23	GCCCTCCTTCTCCACAGCCA;CCACGGGGTTCACGCCGCGC;TGGACTCGAAGCGCACATCG;CGTGCTGCAGGGGGTCCTGC;GGGCATCCAAGGAGCCGCTT;CGGTAGTTGCACACCACCTG;ACAGCTGAGAGCCACGGCGT;GCCACGGCGTAGGAGACCAC;TCCAGACCCGCGTGCTGCAG;CAGGACCCCCTGCAGCACGC;CCACGGCGTAGGAGACCACG;TGCCGGCTACTGCCCCACCA;CCGCCCCATCAATGCCACCC;AGCCACGGCGTAGGAGACCA;CCGTGGCCGAAGCGGCTCCT;ACATTGACAGCTGAGAGCCA;CCGGGCAGCTCACCATGGTG;CCCCGTGGTCTCCTACGCCG;GCAGGACCCCCTGCAGCACG;…	-3.57;-2.99;-2.94;-2.87;-2.16;-1.13;-1.09;-1.04;-0.96;-0.85;-0.8;-0.67;-0.62;-0.45;-0.35;-0.16;-0.12;-0.06;0.01;0.38;0.49;0.83;1.76	1835;5275;5697;6203;11330;22853;23463;24477;25983;28336;29426;32412;33609;38164;41077;46378;47591;49303;51665;61213;63694;69528;75954	4.93E-01;5.74E-01;8.15E-01;1.13E+00;8.83E-01;7.58E-01;7.49E-01;7.86E-01;8.41E-01;8.80E-01;9.83E-01;9.98E-01;1.13E+00;1.04E+00;1.07E+00;9.50E-01;1.07E+00;1.20E+00;1.30E+00;8.30E-01;8.81E-01;6.59E-01;1.94E-01	1488;7914;13748;16229;25777;28139;29851;31064;36365;39278;43833;45030;48016;49106;51459;52965;53979;54589;66116;71238;71745;72179;75607	5.40E-01;5.61E-01;7.02E-01;7.08E-01;1.03E+00;9.68E-01;8.92E-01;8.23E-01;8.98E-01;8.85E-01;9.38E-01;8.56E-01;8.43E-01;7.87E-01;7.66E-01;7.52E-01;7.72E-01;8.57E-01;6.97E-01;7.66E-01;5.60E-01;4.78E-01;2.39E-01
PDSS1	-0.267529	0.563066	4	CCGGCCGTGCGGGACCGTTG;GTTATTGAAGATTTGGTGCG;TATGATGAATATTGCATGCT;TATACGACATACATTTGGAC	-1.6;-0.08;-0.0;0.61	16282;48773;50776;65867	3.83E-01;4.87E-01;4.11E-01;2.81E-01	11575;26666;28669;61160	4.34E-01;5.15E-01;8.93E-01;4.10E-01
LOC105374836	-1.14336	0.684215	4	GGCAGACAAACCAGACATGG;AATGGCAGACAAACCAGACA;TAAGGCCAAGCTGAAGAAAA;GGAAATCGCCAGCTTCGATA	-2.48;-1.49;-1.27;0.66	9081;17596;20634;66790	4.91E-01;7.33E-01;1.26E+00;2.57E-01	10652;56808;59846;68366	4.52E-01;6.40E-01;3.77E-01;2.17E-01
LOC105374839	-1.30793	0.586748	1	GCCGAGGCGGGCAGATCACG	-1.31	20055	0.587	57387	0.13
LOC105374838	-0.920635	0.542073	2	GCCGAGGCGGGCAGATCACG;CAAGGCAGGCAGATCACCTG	-1.31;-0.53	20055;35879	4.16E-01;6.68E-01	41563;57387	3.03E-01;2.60E-01
FBXO18	-0.458535	0.508278	4	GGTCTCGGTGACATCTGGCA;AAGCAGAGGACAGTACGTCT;GACGGCATCCTGTCTAACTG;CACTGGGAAGACCTCAACGC	-2.25;-0.11;-0.1;0.62	10684;47768;48137;66112	4.52E-01;4.75E-01;4.39E-01;2.75E-01	11330;29305;29674;66758	4.39E-01;4.79E-01;8.58E-01;2.58E-01
FKBP15	-0.891307	0.63954	4	AACTAATTGAACGAAATCAG;AATTCGCAAGTCATACCAGG;CGACTTACTATCGATATGCA;TTACCACAGATGACCTCACA	-3.83;-1.01;0.63;0.65	978;25058;66182;66542	1.31E+00;5.41E-01;4.40E-01;2.64E-01	10900;11260;52384;76464	4.47E-01;1.03E+00;3.97E-01;2.21E-02
UBE2J1	-1.4989	0.935428	5	TTCTCTAGATTACACTCCTG;TAACACTTACTACTCCACGA;GCTAATGGTCGATTTGAAGT;TCCTGCCTCAGCCTCCCGAG;ATGGAGGAGTTTATCACGGG	-3.38;-2.86;-2.25;-0.4;1.4	2802;6245;10642;39519;74638	8.07E-01;1.30E+00;1.71E+00;7.80E-01;8.01E-02	2804;37923;66793;71195;74638	8.06E-01;4.97E-01;9.16E-01;5.40E-01;8.01E-02
UBE2J2	-1.09286	0.616403	4	TACCACTCGAGAATATTCGA;ATATGATCACTCCCAACGGG;AGAATCCTTACCTTCATAAG;CTCCGACCACGGCAACCCAG	-2.76;-2.52;0.35;0.55	7035;8813;60471;64863	5.64E-01;1.21E+00;3.79E-01;3.08E-01	12579;16971;68629;70400	4.18E-01;7.55E-01;4.99E-01;1.66E-01
FKBP11	-0.250487	0.532714	4	CACTTGGCCTATGGAAAACG;CAGAGGGTCTCTGGTCAGGG;GTCTTCTCGACATGTGTGTG;TCCCGTCCGGACCCTCCAAG	-1.35;-0.47;0.11;0.7	19461;37541;54430;67546	3.75E-01;4.27E-01;3.84E-01;2.37E-01	9896;23012;39901;57981	4.70E-01;5.82E-01;5.76E-01;5.03E-01
FBXO10	-0.0600327	0.657671	4	GGGCCTACAAGTATCTACTA;ATACCCACCTTATACATGAT;GCAGCACACACCTCACAACG;GCGGTGTATACATAATAGCA	-0.67;-0.52;-0.13;1.08	32319;36314;47210;72404	4.81E-01;4.29E-01;4.51E-01;1.17E-01	5038;30232;41128;45123	6.72E-01;4.69E-01;5.51E-01;9.38E-01
FBXO11	-0.24633	0.620355	6	GCCGAGGCGGGCAGATCACG;CCAGCATGGTGGGATTTATG;CAAGGCAGGCAGATCACCTG;ATATATAACAGATCATGCAC;AACCACTGTAGGGTTAGCAT;AGAGCCTTCCATAAAAACGA	-1.31;-0.68;-0.53;-0.02;0.27;0.79	20055;32279;35879;50336;58500;68888	4.59E-01;5.21E-01;5.12E-01;4.84E-01;4.42E-01;3.05E-01	8554;18942;27106;41563;45163;57387	4.33E-01;5.34E-01;6.28E-01;5.73E-01;7.73E-01;7.81E-01
FBXO16	-0.745868	0.556087	5	CCCGGTCATTCAATAGCTGA;GGAATCTCACTCTGTCACCC;AGTTACAAGCAATTCTCCAG;CTTTACAACCAAGCTTCCAA;GCACAACGACAAAGGCTCCG	-1.68;-1.53;-0.67;-0.21;0.36	15422;17134;32483;44887;60734	3.88E-01;6.36E-01;6.04E-01;6.25E-01;5.28E-01	16708;32555;44959;60308;62020	3.89E-01;4.63E-01;4.63E-01;3.91E-01;4.82E-01
FBXO17	0.447231	1.01347	4	AAGATGAGATTGCGGCCGAA;CATAGAAAAGAACCTAACAC;TGGGCGGCATCGCGTGACCA;GGGCCGCGCACTCTACGCAG	-1.16;0.1;0.22;2.63	22318;54067;57167;77049	3.81E-01;5.74E-01;3.75E-01;8.82E-03	393;20275;23375;55124	1.70E+00;6.50E-01;1.11E+00;5.91E-01
FBXO15	0.189856	0.811466	4	GGAGAGGAGCACATTAGGCT;AAGGCTCACAGCATCCAAGT;ATAACGTTCAAAGACTCCGA;GGAACACACTGCGTACCTGA	-0.92;-0.16;0.15;1.69	26799;46372;55408;75774	4.12E-01;4.61E-01;3.80E-01;3.78E-02	1668;22034;31070;50643	1.09E+00;6.04E-01;8.11E-01;7.38E-01
SFTA3	0.196294	1.00436	4	CAGGGCAGACTTACACAAAG;CTTCCAACTCATTAGGGACC;AAGTGGTAGATTCTGATACT;TGGCACGCAAACAGCGACAC	0.01;0.07;0.18;0.52	51617;53296;56104;64225	1.00E+00;5.59E-01;3.78E-01;3.25E-01	13217;21338;24146;25825	4.10E-01;6.21E-01;1.08E+00;1.91E+00
SFTA2	0.324962	1.09852	4	CTTGGCAGCTCACATGGAAC;TTCCATGTGAGCTGCCAAGG;TTCAGTTGCAAAGTCATACC;TGCCAAGGAGGGTCAAGAGG	0.04;0.13;0.41;0.72	52385;54741;61895;67774	1.04E+00;5.89E-01;3.87E-01;2.32E-01	9668;15547;22701;25057	4.75E-01;8.11E-01;1.15E+00;1.96E+00
CNGB1	-0.517228	0.596993	7	GTGCACAGATGAACCCAATG;GGAATCTCACTCTGTCACCC;CAAGGCAGGCAGATCACCTG;GCAGTCCTACCTTTAAACAG;GTAGGAGGAAGAGGAAGAGG;AGGTAACCTGTGTGTCCCCG;GGAAGTAGATGAGGTCGCAT	-2.27;-1.53;-0.53;-0.32;-0.32;-0.23;1.58	10546;17134;35879;41652;41832;44371;75414	4.02E-01;5.31E-01;5.39E-01;5.39E-01;6.90E-01;9.76E-01;8.06E-02	2028;33071;35610;35790;41563;60308;66896	8.06E-01;6.26E-01;5.38E-01;6.05E-01;6.97E-01;4.62E-01;4.45E-01
CNGB3	-0.47707	0.593924	4	TGAAGCCCAGTAATAAACAC;CAGATCGACTCTATCTCCTG;AGCCCTCTACAAGAAAAAGT;GGCGCGGAAGTAGTTCTGAT	-0.75;-0.66;-0.3;-0.21	30628;32789;42466;44909	4.57E-01;4.47E-01;5.26E-01;9.47E-01	32533;34976;44653;46814	4.85E-01;4.34E-01;4.89E-01;8.74E-01
BCLAF1	-0.814379	0.475333	4	ATTCATCGATAGACTCAGAT;GCTTGATAGGGGTAATACCA;AGACGACCTTATGGGTACAG;TAAAGAGACTGGATATGTAG	-2.63;-0.78;-0.48;0.64	7987;29758;37329;66416	5.26E-01;4.74E-01;6.34E-01;2.67E-01	11026;40114;47684;69455	4.45E-01;4.27E-01;4.45E-01;1.89E-01
BCLAF3	-0.874531	0.712353	5	GGAATCTCACTCTGTCACCC;CTTCCTAAGATTGATAGGCG;TTCCCTCCCACCTTACCAAG;CCAGGCGAATATCCTCTGTG;TCTGCTATTGACCTCTGAGG	-1.53;-1.22;-1.2;-0.45;0.03	17134;21292;21782;38088;52031	3.91E-01;5.40E-01;9.40E-01;8.28E-01;8.64E-01	25411;39354;55660;56150;60308	4.76E-01;5.13E-01;5.32E-01;4.20E-01;5.43E-01
PLA2G6	-0.196947	0.641355	5	GAGAATCGCTTGAATCCGGG;CCGATCAGCCTAAACAACCT;GCACTATGGCACAGTCGAAG;ATGGATGTCACCGACTACAA;CTCACAGAGTGGATTCCGGT	-1.64;-0.74;-0.01;0.68;0.72	15856;30896;50568;67131;67870	3.88E-01;4.61E-01;4.75E-01;4.25E-01;2.86E-01	9572;10311;26874;46546;61585	4.38E-01;9.38E-01;7.49E-01;5.84E-01;4.97E-01
PLA2G7	-0.213743	0.560362	4	CTATAAACCCATGAGATGCC;TGGATAATATAAACGCAAGA;CCTTAGAACCCTGAAACAAG;GAATAAGGCCCATTTCCCCG	-1.04;-0.68;-0.16;1.03	24498;32109;46293;71951	3.93E-01;4.52E-01;4.64E-01;1.28E-01	5491;31149;45333;52945	6.43E-01;4.60E-01;4.78E-01;6.61E-01
PLA2G5	-0.0724953	0.687852	4	CCTAAAATCAATGATCGAGA;CCTACAAATACAGATTCGCG;CGCATGACCACTGCTATGGG;GTAGAAGCCGTAGTTTGTCA	-1.61;-0.27;0.61;0.98	16177;43109;65942;71449	3.83E-01;4.37E-01;4.36E-01;1.40E-01	5993;11500;34333;61265	6.14E-01;1.02E+00;7.12E-01;4.07E-01
PLA2G3	-1.06021	0.631433	4	GGCCACTCTTCAGAGTCAGT;GGAAGCTCAGGTACCCCAGT;CCTGGTGTCACAGTCACAGT;ATGAGCACAGAGAGCACCGT	-2.49;-1.08;-0.88;0.21	9013;23707;27625;56998	4.93E-01;5.67E-01;9.33E-01;5.32E-01	20444;49817;53735;68430	3.76E-01;5.00E-01;3.88E-01;2.15E-01
GDPGP1	-0.0620406	0.74109	4	TGTTGAAGTTGAACTGTACA;GAGATTGTGGCAGAGCATCT;GTGCTGCTGAGCTTACACCC;CCACGAAACCCACAGCACCA	-0.34;-0.18;-0.17;0.44	41287;45769;46142;62459	6.64E-01;4.55E-01;4.66E-01;3.74E-01	14983;31300;31673;36155	3.91E-01;4.58E-01;7.91E-01;1.32E+00
CCDC77	-1.6159	1.017	5	TTTGGTACCTGATTCTCAGT;TTTGGCCAGACGATCTTCGG;GCCGAGGCGGGCAGATCACG;CATTCTCCAAAAGACTATCC;ACAAATTGAAGGGCTCATCG	-3.21;-2.62;-1.31;-1.11;0.17	3800;8059;20055;23159;55951	6.98E-01;1.11E+00;1.02E+00;1.55E+00;7.06E-01	21491;54283;57387;69381;73642	4.22E-01;8.81E-01;5.64E-01;4.75E-01;1.09E-01
KRTAP1-3	-0.0207461	0.760802	4	TGCTCCACCAGTGGGACATG;TGCTGCCAGACCAGCTCCTG;TGGGCGGCACCACCTGATAC;GTCCCACTAGTTGAGAAGCT	-0.59;0.05;0.14;0.32	34471;52611;55014;59731	5.17E-01;5.46E-01;3.82E-01;4.51E-01	17711;22428;24831;42971	3.77E-01;5.95E-01;1.05E+00;1.02E+00
KRTAP1-4	-1.04368	0.598666	5	GGAACCGGCTGTGGCATTGG;GCTGGAGCCACAGGTCCCAC;GCAGCTTACCAGGTAGCAGG;TGCTGCCAGACCAGCTCCTG;CCACCCAGATTGCCACGTGG	-3.15;-2.35;-0.24;0.05;0.48	4155;9942;43935;52611;63490	6.67E-01;9.62E-01;4.66E-01;4.67E-01;4.31E-01	13952;24831;33507;67500;73284	3.90E-01;4.92E-01;5.84E-01;4.31E-01;1.20E-01
KRTAP1-5	-0.546405	0.612715	5	TGCTGCCAGATCAGCTCCTG;TGGCATCAGCTATGGCCAGG;TGGGCGGCACCACCTGATAC;GTCCCACTGATGGAGAAGCT;AGCTGCCAGACTAGCTTCTG	-3.54;-0.13;0.14;0.15;0.65	1984;47227;55014;55450;66551	9.38E-01;6.56E-01;5.22E-01;4.28E-01;3.29E-01	10891;21992;22428;30215;75458	4.16E-01;5.29E-01;9.12E-01;1.15E+00;5.63E-02
CCDC70	-0.0869489	0.694528	4	AATGGAAAAGTCTTTCAGGG;GGAAAGCATGGATCTTGCCT;TATCCTCCTTCCAGAAAGTG;ACTGGGAGAGGATGCCGCCA	-1.28;-0.69;0.79;0.83	20509;31851;68920;69546	3.76E-01;4.54E-01;5.08E-01;1.87E-01	7896;8522;45591;56933	5.30E-01;1.24E+00;4.74E-01;5.34E-01
CCDC71	-1.08474	0.677639	4	CAACCTACCATCCTGCGCAG;TTGGCCAGTCTGCCAGATAG;GTAGACACCTGGATAAAGGT;TGGTGCCCAGAGCCTCGTCG	-3.6;-0.53;-0.21;0.0	1725;35909;44911;51281	1.08E+00;4.31E-01;4.84E-01;7.16E-01	26161;32531;41533;75717	4.06E-01;4.48E-01;5.43E-01;3.91E-02
CCDC78	-0.0307151	0.676804	4	AGAGCTCAGACACAAAGCCC;TGGCCACCCACAGATCTCCA;CCAGGTTGTGCTACGAGCCA;TGAAGGATGAGTACGTCCTA	-0.63;-0.38;0.19;0.71	33276;39992;56388;67622	4.96E-01;4.27E-01;3.77E-01;2.36E-01	9820;21054;37450;44166	4.71E-01;6.29E-01;6.32E-01;9.76E-01
HIST3H2BB	-0.111245	0.748352	4	GCTTGTTGTAGTGTGCCAGG;AGATAGAATAGCTCTCCTTG;TTCTAAAAAGGCTGTCACCA;TCGGCTCCTGCGCCCAAGAA	-1.76;0.27;0.45;0.59	14724;58465;62699;65543	3.94E-01;6.88E-01;3.93E-01;2.90E-01	11899;14743;18977;62718	4.29E-01;8.46E-01;1.35E+00;3.66E-01
HIST3H2BA	0.269909	0.610743	1	AGATAGAATAGCTCTCCTTG	0.27	58465	0.122	18977	0.611
GHITM	-1.05114	0.733436	4	CCACCTATATGTACTTAGCA;GCTCCTCTGACAATATTAGG;CATGATGAGAGGCTCTTGGG;AACTGGCCAAGAACTCAAAG	-1.82;-1.29;-0.86;-0.23	14105;20272;28122;44283	3.99E-01;6.50E-01;9.14E-01;9.71E-01	33159;49320;57170;63337	4.95E-01;4.94E-01;3.75E-01;3.49E-01
CSHL1	-0.841039	0.465506	4	AGAGCTTATAAACTCCTGGT;TGTTGGTGAAGGTACTCCTG;TATTCCGACATCCTCCAACA;GGAAGAAGCCTATATCACAA	-2.97;-1.08;-0.2;0.89	5423;23746;45090;70367	6.47E-01;5.67E-01;4.82E-01;1.66E-01	7075;32352;53696;72023	5.62E-01;4.50E-01;3.88E-01;1.26E-01
FKBP1B	-0.233528	0.770646	10	ACTGATTTGCGGCTTCACAG;GCCGAGGCGGGCAGATCACG;GGAAGCCACTGCCACTACGT;CAAGGCAGGCAGATCACCTG;TGACAGGAATGCTCCAAAAT;GAGACCATCTCCCCCGGAGA;CTTCCATTGGATAAGATCTG;CAAGAAGGGCCAAACGTGTG;AAGGCAGACATCAACACCCA;ATCCCTGCTAGATGAGCTTG	-1.35;-1.31;-0.97;-0.53;-0.53;-0.4;-0.32;0.17;0.89;2.02	19408;20055;25829;35879;35981;39403;41811;56005;70300;76488	7.29E-01;5.62E-01;5.85E-01;6.36E-01;6.20E-01;6.73E-01;8.06E-01;5.88E-01;4.13E-01;5.38E-02	954;7142;21437;35631;38039;41461;41563;51613;57387;58034	9.58E-01;7.53E-01;5.79E-01;6.32E-01;6.10E-01;6.37E-01;8.15E-01;7.10E-01;7.58E-01;1.25E+00
FKBP1C	0.619846	0.832066	1	GGCAAGCAGGAGGTGATCCG	0.62	66042	0.0692	11400	0.832
LINC02193	-0.533336	0.334131	1	CAAGGCAGGCAGATCACCTG	-0.53	35879	0.334	41563	0.27
FKBP1A	-0.866102	0.510216	4	GGGCGCACCTTCCCCAAGCG;ACCGGTGTAGTGCACCACGC;GAAACCATCTCCCCAGGAGA;GGCAAGCAGGAGGTGATCCG	-2.86;-0.61;-0.61;0.62	6228;33903;33948;66042	6.02E-01;4.40E-01;7.23E-01;2.77E-01	11400;43494;43539;71211	4.37E-01;4.39E-01;5.07E-01;1.46E-01
LINC02198	-0.920635	0.542073	2	GCCGAGGCGGGCAGATCACG;CAAGGCAGGCAGATCACCTG	-1.31;-0.53	20055;35879	4.16E-01;6.68E-01	41563;57387	3.03E-01;2.60E-01
LINC02223	-1.52854	0.655112	1	GGAATCTCACTCTGTCACCC	-1.53	17134	0.655	60308	0.109
ERP27	-0.792591	0.479243	4	GGTGACAGAGTACAACCCTG;GGAATTCATTGCTGCCACTG;AGTGCCCATACTCCATAGCA;GGGACATCTGTGAGCCACGT	-2.87;-0.94;0.27;0.37	6212;26339;58590;60820	6.03E-01;5.20E-01;3.75E-01;4.20E-01	16622;18852;51103;71224	3.81E-01;6.91E-01;4.08E-01;1.45E-01
LINC02226	-0.533336	0.334131	1	CAAGGCAGGCAGATCACCTG	-0.53	35879	0.334	41563	0.27
MAP10	-0.337903	0.504938	4	GTGTAAATCCCCCAGCACAC;AAGGCCGAATGTGATAATGT;AGAAGGATAAGCGTTCTGTG;TCACAAGTATGCATACAAAG	-1.22;-0.66;0.12;0.41	21352;32683;54622;61736	3.78E-01;4.47E-01;3.83E-01;3.94E-01	15706;22820;44759;56090	3.86E-01;5.86E-01;4.87E-01;5.60E-01
ERP29	0.0217594	0.716472	4	CTCCTCTCCGCTCCGCATGG;CCAGGGCGTCGTATACAGGC;AGAACCCAGTCCCATACACT;TTCGACACCCAGTACCCCTA	-0.56;-0.4;-0.1;1.15	35145;39638;48057;72973	5.29E-01;4.26E-01;4.40E-01;1.03E-01	4469;29385;37804;42297	7.14E-01;4.78E-01;6.23E-01;1.05E+00
LGALS9C	-1.85413	1.31635	6	CGAGGCAGAAAGGAACATGG;ATTTCAGATCACTGTCAATG;GTACAGCCCTCCCGGAATGG;CAGAGGCACTCTGCACCGTG;AGAAACCACTTACATAGGCA;GGTTCCACTGCAGCTGAGAA	-3.73;-2.55;-2.36;-2.14;-0.23;-0.12	1221;8609;9912;11469;44469;47593	1.06E+00;9.37E-01;1.56E+00;2.28E+00;7.97E-01;1.27E+00	29849;32973;65973;67530;68833;76221	6.93E-01;5.29E-01;1.40E+00;8.48E-01;4.32E-01;4.14E-02
LGALS9B	-2.22077	1.59997	5	CGAGGCAGAAAGGAAGATGG;CAGAGGCGCTCTGCACCGTG;ATTTCAGATCACTGTCAATG;GTACAGCCCTCCCGGAATGG;AGAAACCACTTACATAGGCA	-3.4;-2.57;-2.55;-2.36;-0.23	2652;8485;8609;9912;44469	8.27E-01;1.07E+00;1.96E+00;2.93E+00;1.20E+00	32973;67530;68833;68957;74792	6.36E-01;1.80E+00;1.06E+00;4.63E-01;7.56E-02
UNC50	-2.07633	1.47847	4	ACAGAGCAGAGACTATGATG;GGATAAAATGCAAAATGACC;TCATTATCGAAAACAGACGA;AATCTATGAGTACAACCCAA	-4.2;-1.8;-1.31;-1.0	300;14305;20053;25287	1.81E+00;8.66E-01;1.29E+00;1.94E+00	52155;57388;63142;77142	1.03E+00;6.56E-01;3.98E-01;6.72E-03
NKAIN4	0.340851	0.982746	4	ACAGCCAGCACCTGACACCA;TCTCCCGGCATCGCTCCTGG;ATAGCGCAGCCGGTACTGGA;CCTCTCCCTAGTACACGCTG	-0.72;0.0;0.79;1.29	31255;51178;68881;74064	4.65E-01;5.21E-01;5.07E-01;7.75E-02	3378;8561;26420;46187	8.16E-01;1.24E+00;9.80E-01;8.98E-01
NKAIN3	-1.00449	0.603549	5	TGTAATCGTCCATCATGCCA;GCCGAGGCGGGCAGATCACG;TGTAGGTCTCAGCATTAGAG;CATTCAATATCTCTGTACAT;CAGACCTCGATACATAATGG	-3.07;-1.31;-0.87;-0.08;0.31	4715;20055;27938;48694;59460	6.26E-01;5.64E-01;7.17E-01;5.37E-01;5.74E-01	17982;28748;49504;57387;72727	3.94E-01;4.65E-01;4.69E-01;4.08E-01;1.36E-01
NKAIN2	-0.128646	0.679961	6	GCCGAGGCGGGCAGATCACG;CTTACTCCTGTTATGTAACG;TCCTGCCTCAGCCTCCCGAG;ACTGACGTCACCGTACATCC;CTGAGACCGTGATGTAGCGA;TGCACGCTTATCTTTATCTG	-1.31;-0.84;-0.4;0.1;0.33;1.35	20055;28599;39519;53944;59992;74352	4.59E-01;4.90E-01;5.06E-01;4.88E-01;4.23E-01;1.06E-01	3090;17450;23498;37923;48843;57387	7.09E-01;5.62E-01;7.24E-01;6.49E-01;6.55E-01;7.81E-01
NKAIN1	-0.86066	0.669193	4	TGGCCCATTCTCCATCCACC;GTACCGGGAGCGGTACTGCA;AGCCAGTGACAGAGATGACA;TGCAGGAAGTTGGCTAGGAT	-4.13;-0.61;-0.21;1.51	391;33822;44988;75148	1.70E+00;4.40E-01;4.83E-01;5.22E-02	2294;32454;43620;77051	9.65E-01;4.49E-01;5.06E-01;8.77E-03
MAP1A	-1.12988	0.623475	4	CAGGCTGCTTAGGAATAACG;TGTTGAACATAAGGCTCCGG;ACACAAAGACCGTTGGCCAG;TGGAACAGGACACATACTGG	-2.97;-1.43;-0.16;0.04	5416;18426;46357;52407	6.48E-01;7.05E-01;4.63E-01;6.78E-01	25035;31085;59016;72016	3.97E-01;4.60E-01;3.75E-01;1.26E-01
MAP1B	-0.184758	0.75541	5	AGACACGTACTCTCATATGG;GCCGAGGCGGGCAGATCACG;CCTTCAGAAAATCCGTTGAG;GGTCACAAAAGTGAATCACG;CATCCGACACTTAGACCGAG	-2.66;-1.31;0.08;0.58;2.38	7785;20055;53547;65303;76882	4.83E-01;5.64E-01;5.02E-01;4.02E-01;1.57E-02	560;12139;23895;57387;69657	1.45E+00;8.32E-01;8.52E-01;4.08E-01;2.30E-01
IGSF9B	-0.86161	0.547977	4	GGAATGTGTCGCCACCAACG;TGGTGCTGGTCACCCCACCG;GGTATTTCCCACTAGCACCG;CACGGGCACGTAAATCACAG	-1.98;-1.21;-0.45;0.2	12680;21488;38056;56743	4.17E-01;6.18E-01;6.17E-01;5.40E-01	20699;39386;55954;64762	3.76E-01;4.26E-01;3.78E-01;3.11E-01
UNC5B	-1.71332	0.96989	4	AGGGTGGCGTACAGGCGATG;ATACCCTAGCGATTTCGCCC;CCAGAACGACCACGTCACAC;GATGTATCTACTCATCAACA	-3.22;-2.44;-1.18;-0.02	3723;9374;22019;50302	7.80E-01;1.17E+00;1.18E+00;7.50E-01	27140;55423;68068;73719	4.15E-01;6.05E-01;4.83E-01;8.56E-02
UNC5C	-1.54614	0.897018	4	ATTCTTCCGATACACAAACA;AAATGTATGTGACTGTACAC;GGGTACCACAAAGAGCCGGA;AACCCGGCACCACTCAATGG	-3.95;-2.34;-0.03;0.14	689;10002;49896;55191	1.46E+00;1.12E+00;4.20E-01;5.88E-01	22251;27546;67440;76752	3.81E-01;5.01E-01;4.67E-01;1.55E-02
VGF	-1.22714	0.91496	4	CAGGCGCGTATGCCCGACAG;GCATAAAGAGCCGGTAGCCG;CGAGGCGAGCGATCCCTCCG;CCCCTGTCCAAGGCGTACCA	-3.63;-3.38;0.3;1.8	1595;2788;59348;76057	1.11E+00;2.14E+00;3.76E-01;3.13E-02	1385;18094;74658;75847	1.17E+00;7.16E-01;8.90E-01;3.61E-02
UNC5A	-1.06272	0.637757	4	GCTGCCTTGAGACATTAATG;ACCCCAATGTATACATCACG;AGGACTCACTGTGTACACAG;ATCTCATAGATCTTCCCTCG	-3.45;-0.54;-0.42;0.15	2428;35748;38932;55477	9.43E-01;4.31E-01;5.97E-01;5.79E-01	21965;38510;41694;75011	3.80E-01;4.26E-01;5.40E-01;5.54E-02
UNC5D	-0.519966	0.581053	9	AGAGCAACCCTATTGCACTC;CTTACAGGCTATGCGCACAG;GCCGAGGCGGGCAGATCACG;CAAGGCAGGCAGATCACCTG;CCTAGCTTGCCAGCAAAGCA;ACATTGAGTGAAGCTAGGGG;ACAGTGAGCCGGACATACAG;GACACCAGCACTGATTGCAT;ACCACACGGTGCCATCCCAG	-2.16;-1.7;-1.31;-0.53;-0.24;-0.04;0.16;0.4;0.75	11314;15235;20055;35879;44211;49648;55593;61504;68275	4.30E-01;5.22E-01;6.17E-01;5.87E-01;5.87E-01;5.69E-01;5.50E-01;5.33E-01;4.92E-01	9167;15938;21849;27794;33231;41563;57387;62207;66128	4.10E-01;5.17E-01;5.88E-01;6.45E-01;7.11E-01;7.00E-01;5.28E-01;5.13E-01;6.17E-01
MAP1S	-1.47329	0.961756	5	TTCACTGTGCTGGTCAACGG;CGTACTCCAGGAATTCGCAC;GCCGAGGCGGGCAGATCACG;CTGTCGCTGAGCCCACTGCG;ATTCCCTACCTCATCATACA	-2.61;-2.49;-1.31;-0.95;-0.0	8188;8979;20055;26114;50764	4.71E-01;1.03E+00;1.02E+00;1.37E+00;9.17E-01	26678;51328;57387;68458;69264	4.98E-01;7.74E-01;5.64E-01;4.51E-01;2.42E-01
CCP110	-1.06934	0.664719	5	CCAGAAAAAAGATACCCTAA;GGAATCTCACTCTGTCACCC;CAGTTAACATCCGATGAGAG;CTGCAGTAGAGTGTTCCGTA;AGAAATAAGAGTTTCTTGTG	-3.86;-1.53;-0.42;-0.05;0.52	911;17134;39068;49353;64084	1.25E+00;6.36E-01;5.01E-01;5.24E-01;4.11E-01	13358;28089;38374;60308;76531	3.93E-01;4.68E-01;5.09E-01;3.91E-01;2.57E-02
NO_CURRENT_76	-0.67588	0.609216	4	CATTAGTCTGATACCTGTGC;CATTGCACTCGTTGCCAACG;CATTGCACGCCACAGCATTG;CATTAGCAGCCCAGCGCCCA	-1.4;-0.57;-0.49;-0.25	18777;35056;37110;43843	3.75E-01;4.34E-01;6.40E-01;9.88E-01	33599;40332;42386;58665	5.02E-01;4.27E-01;5.27E-01;4.82E-01
NO_CURRENT_77	-1.23759	0.81874	4	CATTGTATGAACGCAATAGC;CATTGTTGAGCGGGCGCGCT;CCAATCTTGAACGTCATGTT;CCAAAAAGATGAATATCTCG	-4.22;-0.85;-0.57;0.69	277;28313;35086;67322	1.85E+00;4.91E-01;6.92E-01;2.43E-01	10120;42356;49129;77165	4.64E-01;4.34E-01;4.28E-01;6.20E-03
NO_CURRENT_74	-0.593054	0.752821	4	CATAGGTCCCTAGCAACTCC;CATCATAAATGTACAACGGG;CATGAGCGCATTGAATAATA;CATCTGTAGGGTTGCAAGCC	-0.62;-0.61;-0.59;-0.55	33734;33798;34436;35443	5.04E-01;4.40E-01;7.09E-01;1.36E+00	41999;43006;43644;43708	6.82E-01;4.37E-01;5.05E-01;9.94E-01
NO_CURRENT_75	-1.04258	0.799673	4	CATGGCCTACGGTGTCTTTG;CATGATAGATCAGTCTTCCC;CATGGCATAAGTATAAGACA;CATTAAACCTTGCCCCACAA	-1.48;-1.26;-1.16;-0.28	17786;20784;22365;43002	3.77E-01;6.36E-01;1.16E+00;1.02E+00	34440;55077;56658;59656	5.16E-01;5.97E-01;3.76E-01;4.53E-01
NO_CURRENT_72	-0.0728801	0.650192	4	CAGGGTTGCGCAGAGGACTC;CAGGTTTGCACGCATAGCTA;CAGGAGTCGCCGATACGCGT;CAGGCTGCGCTTCGCAAGCT	-0.79;-0.22;0.08;0.64	29681;44578;53541;66338	4.44E-01;4.46E-01;3.89E-01;2.69E-01	11104;23901;32864;47761	4.43E-01;5.64E-01;7.55E-01;8.40E-01
NO_CURRENT_73	-0.0264738	0.844676	4	CAGTGTCCGAGCGATATTTT;CATAAGGTTAACTGCGTGGA;CAGTCGTTTCTATGGGATCT;CAGTAGCGATCGAATGTCAA	-2.14;0.07;0.86;1.1	11497;53112;69986;72608	4.36E-01;5.55E-01;5.46E-01;1.12E-01	4834;7456;24330;65945	6.87E-01;1.34E+00;1.07E+00;2.79E-01
NO_CURRENT_70	0.127058	0.896379	4	CAGACGGTTGGTAAGGACGC;CAGACCCAGTAAAACCACCA;CAGACCTAGCTCCGCTCCCA;CAGAGACAATGACATGTAGA	-0.48;0.27;0.29;0.43	37195;58445;59106;62224	5.69E-01;6.87E-01;3.76E-01;3.80E-01	15218;18336;18997;40247	3.90E-01;7.08E-01;1.35E+00;1.14E+00
NO_CURRENT_71	-0.0164746	0.709931	4	CAGCCTATTTTGCTACCTAC;CAGCGCCGAAACTCTTTCCG;CAGAGCCTTGCGCAATTTTG;CAGCGGTGCTATTTGGTCTT	-1.07;-0.14;0.54;0.61	23834;46995;64523;65834	3.89E-01;4.67E-01;4.13E-01;2.82E-01	11608;12919;30447;53608	4.34E-01;9.36E-01;8.31E-01;6.39E-01
ANKRD19P	-1.55436	0.892196	2	ACGCCCGCGACAGAAAAGAC;GGAATCTCACTCTGTCACCC	-1.58;-1.53	16519;17134	4.74E-01;1.31E+00	60308;60923	4.63E-01;2.08E-01
LOC101927837	-0.141818	0.608464	4	ACGCAGCGACGTGAGGAGCG;AGAAGAGGATCTGTTGCAGG;CCTGCAGGTACTAGACCTGC;GCCACGCGAGGAGCCCAGAT	-0.69;-0.56;-0.03;0.71	32046;35305;49952;67633	4.77E-01;4.33E-01;4.19E-01;2.35E-01	9809;27490;42137;45396	4.72E-01;5.02E-01;5.32E-01;9.28E-01
NO_CURRENT_78	0.0605783	0.837158	4	CCACTGGTAAAGGCTAGACT;CCAATGATAAGCCCGAACGG;CCACGATGCCACCTCATCCC;CCACACCTGTCTAGCATGAC	-0.17;-0.11;-0.05;0.57	46183;47651;49474;65212	8.04E-01;4.73E-01;4.24E-01;2.99E-01	12230;27968;29791;31259	4.23E-01;4.96E-01;8.54E-01;1.58E+00
NO_CURRENT_79	-0.0271413	0.754909	4	CCAGAGCCTTGGTTTATATC;CCAGGCTGAAGTTCGTACCT;CCAGCAATACCCCGGTATGG;CCAGAAAGCCTCTCCATTAC	-0.35;-0.28;0.2;0.33	40815;42934;56590;59966	6.52E-01;4.36E-01;3.76E-01;4.44E-01	17476;20852;34508;36627	3.78E-01;6.34E-01;7.07E-01;1.30E+00
LOC105372295	-1.1965	0.763501	4	TGGACTCCCACTGATCCCGT;GCGGTCGCACGGCGTTGACG;GGTTGTAGGAAACACGACTT;CCTCGGAACTCACGGCATGA	-2.15;-1.58;-0.86;-0.2	11410;16573;28110;45276	4.37E-01;7.70E-01;9.14E-01;9.32E-01	32166;49332;60869;66032	4.79E-01;4.94E-01;3.81E-01;2.77E-01
LOC105372299	-0.533336	0.334131	1	CAAGGCAGGCAGATCACCTG	-0.53	35879	0.334	41563	0.27
LOC100420353	-0.875777	0.444864	1	ACCTTGGACATAAAAGCTCT	-0.88	27804	0.445	49638	0.193
RPL18A	-1.90998	1.4033	4	CTACGAGAGTACAAGGTAGT;CTGCGCTATGACTCCCGGAG;GAAGTTCTTCACCCGCAGGG;CTTTCCACAGACCGAGACAT	-2.56;-1.9;-1.66;-1.53	8552;13407;15704;17136	5.07E-01;9.10E-01;1.58E+00;2.62E+00	60306;61740;64035;68892	1.47E+00;8.05E-01;4.07E-01;2.03E-01
VDAC1P1	1.12098	1.21928	1	AAGCGGGAGCACATTAACCT	1.12	72768	0.027	4674	1.22
CLEC18A	-0.44748	0.773516	8	TCATGCGACAAGGATTCCTG;CACCTGCACCCACTACACGC;GTGGAAGGGAAAATGCACCT;GAGCAGGCTCCGATGGCCGG;GGTCAGCCTATGGTTTGCAG;GACAAAGGACACCAAGCCCG;TCGGGGTTGGGGTTCCACAG;TGGCCACACCTCTGCCCAGG	-3.14;-1.86;-1.34;-1.03;0.37;0.78;1.07;1.57	4241;13712;19632;24658;61010;68831;72308;75352	5.30E-01;5.64E-01;6.75E-01;8.09E-01;7.90E-01;7.68E-01;4.84E-01;9.50E-02	2090;5134;8611;16432;52784;57810;63735;73201	7.49E-01;1.09E+00;1.37E+00;1.26E+00;5.75E-01;5.07E-01;4.41E-01;1.96E-01
CEND1	-1.02083	0.694429	4	GGTGCCCCAGGTCACCACCG;GGGTTGCATCGGGACTGCTG;CTTCGAGGGCTTGGTCAAGG;GGCACCTGCCAAGAAGACCT	-2.04;-1.06;-0.76;-0.22	12227;24154;30265;44603	4.23E-01;5.59E-01;8.37E-01;9.58E-01	32839;47177;53288;65215	4.89E-01;4.68E-01;3.91E-01;2.99E-01
CLEC18B	-0.821661	0.682724	9	TCATGCGACAAGGATTCCTG;GCACCACCTGGGCAGAGGTG;CACCTGCACCCACTACACGC;GTGGAAGGGAAAATGCACCT;GAGCAGGCTCCGATGGCCGG;TTGTTGAAGTGGTCAGCCTG;GTGTAGCAGGGCTTACCCGG;TCGGGGTTGGGATTCCACAG;TGGCCACACCTCTGCCCAGG	-3.14;-2.14;-1.86;-1.34;-1.03;-0.78;0.47;0.86;1.57	4241;11478;13712;19632;24658;29903;63218;69900;75352	5.03E-01;5.90E-01;8.39E-01;9.19E-01;1.05E+00;1.19E+00;5.33E-01;4.13E-01;1.07E-01	2090;7542;14224;47539;52784;57810;63735;65964;73201	7.10E-01;7.78E-01;8.12E-01;8.14E-01;7.20E-01;6.26E-01;5.40E-01;4.32E-01;2.20E-01
BORCS7	-0.0322972	0.802024	4	AGGTCAGGCAGCTCGAAACA;GAACGCCAGAGTCTCAAGCG;GGTTCGGTCAGTCCGTGAAG;CGTAATCGCGCTCACCAAGC	-1.63;-0.98;0.9;1.59	15944;25666;70405;75431	3.85E-01;5.31E-01;5.64E-01;4.57E-02	2011;7037;51776;61498	1.02E+00;1.39E+00;4.02E-01;4.00E-01
BORCS6	-1.0233	0.586712	4	AGGGAGTGCCGAGTCCGGCG;GAAGAGACCGAGAACGTTGG;AGAACGAGCCCGGCCCTCAA;CAAAGTGGGTAAGGTCGCCG	-2.82;-0.86;-0.63;0.21	6601;28212;33510;56897	5.83E-01;4.92E-01;7.36E-01;5.36E-01	20545;43932;49230;70842	3.76E-01;4.42E-01;4.27E-01;1.55E-01
BORCS5	-0.414155	0.616901	6	GCCGAGGCGGGCAGATCACG;ATCGTTGCTGACGTTCCGTG;CAAGGCAGGCAGATCACCTG;AGGAGTTCAGATCGTTGGGT;TTTGGTTAAACGAATCAAAG;GCAGGTGATCTTGATATCGG	-1.31;-0.6;-0.53;-0.43;-0.35;0.74	20055;34085;35879;38805;40924;68090	4.59E-01;5.44E-01;5.12E-01;6.28E-01;9.33E-01;3.35E-01	9352;36518;38637;41563;43357;57387	4.19E-01;5.85E-01;5.05E-01;5.73E-01;8.38E-01;7.81E-01
LOC105372741	-1.30793	0.586748	1	GCCGAGGCGGGCAGATCACG	-1.31	20055	0.587	57387	0.13
TARDBPP2	-1.80704	0.806862	2	GACATATGATAGATGGACGA;CAAGGCAGGCAGATCACCTG	-3.08;-0.53	4672;35879	9.45E-01;6.68E-01	41563;72770	3.03E-01;5.40E-02
LOC105372745	-1.30793	0.586748	1	GCCGAGGCGGGCAGATCACG	-1.31	20055	0.587	57387	0.13
BORCS8	-1.14432	0.654374	4	CCTGGCCAACGAGCCATCCG;CCAGGGAGCCATCTACACTG;AGCCGGAGATGCAGCTCAAG;CACTGAGAGCGTCTACGTCC	-3.3;-1.07;-0.98;0.76	3233;23987;25701;68518	8.33E-01;5.62E-01;1.01E+00;2.13E-01	8924;51741;53455;74209	4.96E-01;5.30E-01;3.90E-01;7.41E-02
SDR42E1	-0.412727	0.662266	4	CCTCTTATGGTATGTCAGGG;TCCGAGAGTAGTGATCAGGG;GTGCTGGTGTAAACTAACCT;CCTGCACCAAGTTATCCACG	-3.38;-0.22;0.53;1.42	2761;44642;64352;74749	8.93E-01;4.47E-01;4.11E-01;6.15E-02	2693;13090;32800;74680	9.03E-01;9.27E-01;7.56E-01;6.31E-02
LINC01750	-0.534482	0.457071	4	GCTCCGTGCCTCGTCGACCC;ATCCAGGATTCCGGGCACCG;AAGGTCAGCATGTGCCCACA;CCAGATTCCCACCCTCAGGG	-1.77;-0.83;-0.5;0.97	14577;28761;36715;71272	3.95E-01;4.85E-01;6.49E-01;1.44E-01	6170;40727;48681;62865	6.05E-01;4.28E-01;4.33E-01;3.62E-01
ALOX12B	-0.0751691	0.693863	4	CCAGTTACCGCCCTCCGGTG;GTTCCCCGTCACAGACGACA;CAAGACGTGGGTACGCTATG;TGCACATAGTTGCAGTACCA	-0.46;-0.45;-0.33;0.94	37863;38193;41499;70950	5.83E-01;4.26E-01;5.44E-01;1.52E-01	6492;35943;39249;39579	5.89E-01;4.30E-01;5.90E-01;1.17E+00
LINC01754	-0.533336	0.334131	1	CAAGGCAGGCAGATCACCTG	-0.53	35879	0.334	41563	0.27
EPB41L1	-0.864918	0.560442	5	ATCCATCCCAGCAGGACACG;GCTCCAAGTTCCGGTACAGT;CAAGGCAGGCAGATCACCTG;GTTCCCAGTCTCGATCCCGG;GGGTCTGGTTAGGGGCGAAG	-2.86;-1.0;-0.53;-0.44;0.5	6291;25325;35879;38509;63803	5.38E-01;4.87E-01;5.43E-01;8.13E-01;4.21E-01	13639;38933;41563;52117;71163	3.92E-01;5.08E-01;4.79E-01;4.74E-01;1.84E-01
PPCDC	-0.593183	0.47825	4	GTGACAGCTGGAAGTAGCAG;GCAGGTCAATGTGCAGAACT;CAGCGACGCTGATGAATGGG;ATGTTCTTGTGGGTGTCACG	-2.62;-0.94;0.41;0.78	8081;26377;61898;68721	5.23E-01;5.19E-01;3.87E-01;2.08E-01	8721;15544;51065;69358	5.02E-01;8.11E-01;4.08E-01;1.92E-01
EPB41L3	0.495147	1.20588	4	AGCCAAAATACCAACCTCAG;GAGATGACATCGTGTCCGGA;AAGGTTAGGAATTTCTTGGG;TGGGCCATCAGAGTCCAAGG	-0.36;0.44;0.74;1.16	40674;62496;68077;73124	6.48E-01;8.37E-01;4.83E-01;9.96E-02	4318;9365;14947;36768	7.26E-01;1.17E+00;1.63E+00;1.29E+00
EPB41L2	0.459345	1.22826	5	CAAGGCAGGCAGATCACCTG;AAAGTCATATACCTTAGTAG;CTAAGAGGGTCACTTTACAC;TAAGCAAGGCAACAGACCTG;AAGACTATGGAAAGTGTGCG	-0.53;0.27;0.29;0.48;1.79	35879;58487;59027;63357;76032	7.16E-01;1.08E+00;6.01E-01;3.90E-01;3.99E-02	1410;14085;18415;18955;41563	1.07E+00;7.42E-01;1.11E+00;1.87E+00;1.35E+00
EPB41L5	-0.488642	0.555588	5	GGTTGATATGCATGTGGTCA;CAAGGCAGGCAGATCACCTG;TTGGCAGCTTATAATCTGCA;ACCTTCGTGAGGAGCTAACC;CTAAGTCCATCATCACGTGT	-1.34;-0.53;-0.46;-0.31;0.2	19587;35879;38017;41948;56725	4.05E-01;4.79E-01;5.13E-01;7.05E-01;6.76E-01	20717;35494;39425;41563;57855	4.14E-01;4.76E-01;4.98E-01;7.16E-01;6.33E-01
ACSS3	-1.63645	1.05368	5	CCGGGACCACTAAAGCCCTG;CTTGTACCAGCTGATCTGCT;GCCGAGGCGGGCAGATCACG;GGTGTGATTAGGCCCACTGG;ACATGGTATACATCGCCTGT	-3.12;-2.65;-1.31;-0.96;-0.15	4407;7876;20055;26033;46614	6.48E-01;1.13E+00;1.02E+00;1.37E+00;1.10E+00	30828;51409;57387;69566;73022	5.83E-01;7.76E-01;5.64E-01;4.80E-01;1.28E-01
ACSS2	-0.448211	0.548274	6	GGAATCTCACTCTGTCACCC;GGAACCAAGGGATTGACTTG;CAGGAAGGGGAGTCAACATG;CAAGGCAGGCAGATCACCTG;CAGTGGCCCATAGGTGACGT;GCATTGTGGTCAAGCACCTG	-1.53;-0.78;-0.74;-0.53;0.26;0.64	17134;29782;30700;35879;58108;66444	4.20E-01;4.97E-01;5.62E-01;7.01E-01;4.48E-01;3.99E-01	10998;19334;41563;46742;47660;60308	4.02E-01;5.28E-01;5.12E-01;5.05E-01;6.91E-01;6.52E-01
ACSS1	-0.0916836	0.727306	4	GCTGAAATACGGTGATGCCT;GATCAAAGCAACGCTCTCGG;ACCAGCATTGGGATAAACTG;CAGACAACAAGGTCCACATG	-1.97;0.14;0.18;1.28	12806;55024;56229;73998	4.15E-01;5.95E-01;3.77E-01;7.90E-02	3444;21213;22418;64636	8.09E-01;6.25E-01;1.16E+00;3.14E-01
KIDINS220	-0.250703	0.572962	4	CCACGACTATTAAGGAACAC;ATCTCGAGCCACAAGAACTG;TACACGCCAAGGTATTACCC;TGTTGAACTGTCGTACATGG	-1.84;-0.3;0.33;0.81	13883;42493;59910;69227	4.02E-01;4.34E-01;3.78E-01;1.95E-01	8215;17532;34949;63560	5.18E-01;7.35E-01;6.95E-01;3.43E-01
LOC107984686	-0.533336	0.334131	1	CAAGGCAGGCAGATCACCTG	-0.53	35879	0.334	41563	0.27
PUDP	-0.161322	0.608266	4	AGAAACTCATCATCCACCTG;CTATGACAAGAAATACAGCT;GGGTAAGAAGGCATTAGAGG;TGTCTTCATATCGAACGACG	-1.07;-0.96;0.3;1.08	23851;26026;59323;72420	3.89E-01;5.25E-01;3.76E-01;1.16E-01	5022;18119;51416;53591	6.73E-01;7.15E-01;4.05E-01;6.40E-01
PCOLCE2	-0.295916	0.5346	4	GGGGTCGCGTTACCTCTCTG;ATAGGTGCTACTTACGCAGG;GAAGGGGATCAGTATTGTGG;ACACACAAGTGACTCCTGCA	-1.41;-0.41;0.23;0.4	18655;39321;57477;61666	3.75E-01;4.26E-01;3.75E-01;3.96E-01	15776;19965;38121;58787	3.86E-01;6.58E-01;6.16E-01;4.79E-01
DFNA5	-1.13144	0.596716	4	TCTTCTGTGTCAAAACGCAC;ATGAAGACTGGCTCTCTACG;GGAGAAGTGTGGTGGCATCG;GTATAACTCAATGACACCGT	-3.13;-1.57;-0.45;0.63	4258;16669;38111;66178	7.31E-01;7.67E-01;6.16E-01;2.73E-01	11264;39331;60773;73176	4.40E-01;4.26E-01;3.81E-01;9.84E-02
MAGEH1	0.398805	1.08877	4	ACAGAAGAGTTTGTGCGCAG;CTGCGGCTCTCGCATTACGG;GGAAGACCCGAGCACTCCAG;GGGAAGTTAGGAATGCAGCC	-0.79;0.34;0.82;1.23	29677;60234;69346;73610	4.44E-01;7.47E-01;5.23E-01;8.81E-02	3832;8096;17208;47765	7.70E-01;1.28E+00;1.47E+00;8.39E-01
WNT3	-0.342934	0.700329	5	GGATGCGCGCGAGAACAGGC;ACCAAATTGGGTAGCCAGCG;CAAGGCAGGCAGATCACCTG;TTTGGGCCCGTCCTCGACAA;GCATGATCTCGATGTAATTG	-2.64;-0.93;-0.53;1.18;1.22	7914;26515;35879;73238;73562	4.79E-01;4.77E-01;5.43E-01;6.63E-01;1.12E-01	3880;4204;41563;50927;69526	6.90E-01;1.60E+00;4.79E-01;4.95E-01;2.34E-01
WNT2	-0.941225	0.595054	4	CCTTTGCATCCACAAATGCG;AAACGGGCGATTATCTCTGG;TACATGAGCCGCTCACCCCG;CCGAGGTCAACTCTTCATGG	-1.97;-1.35;-0.6;0.16	12759;19374;34258;55622	4.16E-01;6.75E-01;7.14E-01;5.75E-01	21820;43184;58068;64681	3.79E-01;4.38E-01;3.75E-01;3.13E-01
WNT1	0.0745112	0.810326	4	ATCTCGGAGAATACGGTCTG;TTCGGCAAGATCGTCAACCG;CCTGCACGTGTGACTACCGG;GTCTGATACGCCAAAATCCG	-0.24;-0.21;0.05;0.7	44093;44831;52664;67521	7.40E-01;4.48E-01;3.95E-01;2.38E-01	9921;24778;32611;33349	4.69E-01;5.47E-01;7.62E-01;1.46E+00
LRRN4	-1.10744	0.683987	4	GGCGACAGAAGCAAGTGCTG;CAGTTCTCTTTGCATCCGTG;TGGAGCGGTTGAAGCAAGGT;AGCGGCACGTTCCTTGAACG	-2.05;-1.68;-0.99;0.29	12212;15438;25343;59048	4.24E-01;8.16E-01;1.03E+00;4.71E-01	18394;52099;62004;65230	3.76E-01;5.36E-01;3.88E-01;2.98E-01
LRRN3	-0.314867	0.634311	4	CCTATTAATAGAATACGAAG;AGCTCTCAGGAGCTATAAGA;AGAAATACCAGATAACGCCT;AAGGTTTACTGGAAAGTCTG	-2.31;-0.57;0.78;0.83	10267;35094;68843;69521	4.61E-01;4.34E-01;5.06E-01;1.87E-01	7921;8599;42348;67166	5.29E-01;1.23E+00;5.28E-01;2.47E-01
WNT6	-0.487899	0.59244	4	GTGGTGGCAGAGCTAGCTCG;GCAACTGCACAACAACGAGG;GCTGGTAGGGTCCATAACCA;CGAGGCTCTTTATGGACGCG	-0.74;-0.68;-0.38;-0.16	30891;32144;40100;46504	4.60E-01;4.51E-01;5.72E-01;8.86E-01	30938;37342;45298;46551	4.61E-01;4.27E-01;4.78E-01;8.84E-01
LRRN1	0.0306701	0.793415	4	GAGTTCAGGCAAGTTATCCA;CTTCCCAAATCGTTTAAACG;TAGACAGTAATCAGTCATCT;GCACTTGTGTGTCACTAGAG	-1.56;0.09;0.65;0.94	16788;53763;66586;70964	3.80E-01;5.68E-01;4.48E-01;1.52E-01	6478;10856;23679;60654	5.89E-01;1.06E+00;1.10E+00;4.24E-01
WNT4	-0.586681	0.498721	4	TGGCCAAGCTGTCGTCGGTG;ATCCACAAACGACTGTGAGA;CATCCTGACACACATGCGGG;GTCATGGACTCGGTGCGCCG	-3.12;-0.62;0.29;1.11	4350;33654;58990;72623	7.24E-01;4.41E-01;3.75E-01;1.12E-01	4819;18452;43788;73092	6.88E-01;7.04E-01;5.03E-01;1.00E-01
RNF175	-0.353174	0.499652	4	AGGATGTACAAGATGCACCG;GCCTCTACTATGGAGTAATG;GATGACTCACATTGTAGGAT;TGGCGGTTTCTGTCTATGTG	-1.19;-0.59;-0.36;0.72	21931;34464;40795;67764	3.80E-01;4.37E-01;5.58E-01;2.32E-01	9678;36647;42978;55511	4.75E-01;4.28E-01;5.17E-01;5.78E-01
RNF170	0.214119	0.912949	5	AGAAAACCAGGAGCTAGTAA;TGGGTTGCCCTGAGAATCTC;CAAGGCAGGCAGATCACCTG;TTCCCGGTGGAGACCAACTG;GCGATATGGTTCATGGCTTG	-0.6;-0.54;-0.53;0.4;2.33	34262;35818;35879;61648;76841	6.70E-01;4.79E-01;5.43E-01;3.88E-01;1.69E-02	601;15794;41563;41624;43180	1.42E+00;6.78E-01;4.79E-01;7.14E-01;1.27E+00
FTH1P4	-2.96438	1.1509	1	TCTTCAAAGCCACATCATCG	-2.96	5471	1.15	71979	0.0318
PCNA	-1.33236	0.76999	4	ATACGTGCAAATTCACCAGA;TGGCCAGGTTGCGGTCGCAG;TGCTTCAAATACTAGCGCCA;GCTGGAGCTAATATCCCAGC	-2.69;-1.81;-0.64;-0.19	7522;14162;33204;45632	5.44E-01;8.73E-01;7.44E-01;9.19E-01	31811;44238;63280;69933	4.73E-01;4.44E-01;3.99E-01;1.77E-01
ZBTB7A	-0.0334446	0.685906	4	ACCGTCAGCACAGCCAACGT;GCCGTAGTGGCCGTTCTGCG;ATCATCGGACGCCCCAAAGG;GAGTCGCGGGCCGACGACAA	-0.81;-0.17;0.28;0.56	29301;46113;58709;65019	4.39E-01;4.58E-01;3.75E-01;3.04E-01	12423;18733;31329;48141	4.20E-01;6.95E-01;8.02E-01;8.26E-01
ZBTB7C	-0.526586	0.522481	5	GTATGGGTCCTCATGTGCCG;CAAGAATCGGAAGATCAAGG;CAAGGCAGGCAGATCACCTG;GAGGTGTGGAAAGAAGTCCG;AAAGTCGATCTCATAGACGT	-1.29;-0.92;-0.53;-0.31;0.42	20364;26766;35879;42164;61958	4.11E-01;4.75E-01;5.43E-01;6.99E-01;4.84E-01	15484;35278;41563;50676;57078	3.88E-01;4.75E-01;4.79E-01;4.99E-01;6.63E-01
ZBTB7B	-1.60574	0.947437	4	TCCGGATGGTGAGGTCACAT;AGCAAACCACCTAGTCCCTG;CAGAGCTACGAACCCTATGA;TGTATAGGCAAATTCAAGGA	-3.87;-1.99;-0.4;-0.17	882;12645;39588;46141	1.36E+00;9.51E-01;5.83E-01;9.00E-01	31301;37854;64797;76560	4.66E-01;4.26E-01;4.17E-01;1.99E-02
PCNP	-0.574207	0.5535	5	GGGGTTGTGTTCACCTCCGG;TCAGCCATATCCATCAAACT;CAAGGCAGGCAGATCACCTG;TGTAGGCTTTGTTGGGAGGT;ACCTATGGCAAATCCAAACT	-2.35;-1.32;-0.53;-0.45;1.79	9957;19857;35879;38032;76022	4.31E-01;5.68E-01;5.43E-01;8.30E-01;4.02E-02	1420;39410;41563;57585;67491	1.07E+00;5.13E-01;4.79E-01;4.07E-01;2.99E-01
PCNT	-1.05463	0.660383	5	CAGACTTTGAGGAACAACTG;GCCGAGGCGGGCAGATCACG;GTGATGCCAATACAGCCACG;ATCTAGTGTAGACTGCAACG;ACAGCGTGGGATGTTCACAA	-3.19;-1.31;-0.51;-0.51;0.24	3908;20055;36471;36597;57809	6.88E-01;5.64E-01;5.34E-01;8.81E-01;6.35E-01	19633;40845;40971;57387;73530	4.05E-01;5.32E-01;4.84E-01;4.08E-01;1.13E-01
LOC105373506	0.344764	0.655543	1	AACACATCCAGTTAAAACTG	0.34	60325	0.108	17117	0.656
UTY	-0.0213772	0.813186	6	GGAATCTCACTCTGTCACCC;CAAGGCAGGCAGATCACCTG;AGGATTCATAGAGAGTACCT;AGTAGAAGTAGACCAAACCA;TGACTGTCAGCATCCCCCTG;TCAGAACTTCTGTTGAACTG	-1.53;-0.53;-0.0;0.28;0.74;0.91	17134;35879;50710;58783;68209;70604	4.20E-01;5.73E-01;6.36E-01;5.39E-01;4.21E-01;2.41E-01	6838;9233;18659;26732;41563;60308	4.77E-01;8.92E-01;9.12E-01;1.04E+00;9.07E-01;6.52E-01
PACRG	-0.743164	0.504584	5	GAGTGACACAGATGACCTGT;CAAAGCCCATCAAAAAACAG;CAAGGCAGGCAGATCACCTG;CACGACATGCTGGAACACGG;TTTCGAAAATTCTATGAGCG	-3.25;-1.64;-0.53;0.67;1.04	3486;15909;35879;66912;72053	7.28E-01;6.74E-01;5.43E-01;4.21E-01;1.57E-01	5389;10530;41563;61533;73957	5.84E-01;9.24E-01;4.79E-01;3.88E-01;1.00E-01
PCAT7	-1.52854	0.655112	1	GGAATCTCACTCTGTCACCC	-1.53	17134	0.655	60308	0.109
DNPH1	-1.08689	0.593246	4	GGGCCGTGGCCTTTAACAAG;AGGACAGGACGCTGTACGAG;TTCTGCGGGAGCATTCGCGG;TCATAGCCTACACCCAAGGA	-2.69;-1.51;-0.65;0.49	7559;17395;33010;63653	5.42E-01;7.40E-01;7.50E-01;3.41E-01	13789;44432;60047;69890	4.03E-01;4.45E-01;3.78E-01;1.78E-01
ILF3	-2.65353	1.90111	4	AGCACATGACCAGAACCCTG;TGCTGGTTCCAACAAAAAGG;TACGCCCATGAAACGCCCAA;CGTCCCTCCGACACGCCAAG	-3.58;-3.39;-2.91;-0.74	1797;2740;5907;30824	1.06E+00;2.16E+00;2.79E+00;1.60E+00	46618;71535;74702;75644	8.19E-01;1.53E+00;8.96E-01;4.08E-02
ILF2	-1.6764	1.18119	5	TTCCACGACTTTGTTCCCCA;ACTAGTAGGTCAAGGATCCA;TGATGAAACTTCCTTCAGTG;AATTGAAGAAGTTCGACAGG;CAAGGCAGGCAGATCACCTG	-3.63;-1.87;-1.38;-0.96;-0.53	1601;13613;19027;25949;35879	1.02E+00;7.62E-01;1.07E+00;1.38E+00;1.67E+00	41563;51492;58415;63829;75840	9.08E-01;7.79E-01;5.87E-01;3.92E-01;4.54E-02
BOK	-1.4986	0.910273	4	GGTGGTGTCCCTGTATGCGG;GCCGGGAGTACGTGCACGCG;AGGAACGCATCGGTCACCAC;GCCCAGCGTCTACCGCAACG	-2.77;-1.97;-0.75;-0.51	6943;12824;30543;36549	5.68E-01;9.41E-01;8.28E-01;1.30E+00	40893;46899;64618;70505	6.54E-01;4.66E-01;4.15E-01;1.63E-01
LOC101928688	-0.823971	0.38352	2	GAGTATATTAGCCAAGCTAC;AAACAATGTATAGGTCATAG	-2.19;0.54	11116;64579	6.09E-01;1.58E-01	12863;66322	5.57E-01;1.35E-01
BOC	-0.299421	0.569994	4	ACTGGTACCGTCCCACAGTG;AATCCAGGTCACGTACACTG;CAGACTCATATGAACTGGTG;CGTCAAACAAGAGTGGCTGG	-1.57;-0.18;0.27;0.27	16679;45933;58456;58592	3.81E-01;4.57E-01;3.75E-01;4.85E-01	18850;18986;31509;60763	3.75E-01;6.87E-01;7.96E-01;4.21E-01
FAM24B-CUZD1	-0.947573	0.676835	8	AATGGGACATAATTCTACAG;TATAAGCAAATCCTACCTAG;CATCGCTGGTGGTATCCTGG;AGAGCACGACAACTATCAGC;GTGGTGGGCCAAGAACAGCC;AGCTGCACAGTCAGTCTAGG;CAACCCAGACAAGGTGTGGT;TTGTGTGTGGCACATACAAG	-3.43;-2.16;-1.09;-0.99;-0.84;-0.17;0.5;0.6	2501;11350;23531;25436;28627;45965;63885;65620	6.88E-01;6.34E-01;5.90E-01;7.81E-01;1.01E+00;6.94E-01;4.39E-01;5.76E-01	11822;13557;31477;48815;52006;53911;66092;74940	4.17E-01;5.68E-01;5.57E-01;6.85E-01;5.67E-01;5.31E-01;4.13E-01;1.14E-01
DENND2C	-0.699388	0.485064	5	AAATATCTGAATGTCCTACG;GGAATCTCACTCTGTCACCC;GGGAATTGTTGTATGACCTG;TCTATACCTCACAAATACTG;CAAAGGAAAGCGACTCCCTG	-3.27;-1.53;-0.29;0.52;1.07	3390;17134;42561;64158;72361	7.38E-01;6.36E-01;4.73E-01;3.94E-01;1.47E-01	5081;13284;34881;60308;74047	6.02E-01;7.76E-01;5.59E-01;3.91E-01;9.73E-02
DENND2A	-1.03796	1.069	7	GCCATTTATGAGGTCCGGAG;GGAATCTCACTCTGTCACCC;GCCGAGGCGGGCAGATCACG;GCTGACACGCACTTTATCGG;TAAAGGAGCAGTGAACGTCG;CAAGGCAGGCAGATCACCTG;GCATGTTTGAACGTTCTCCG	-1.58;-1.53;-1.31;-0.98;-0.91;-0.53;-0.42	16534;17134;20055;25618;26979;35879;38900	4.51E-01;5.31E-01;7.37E-01;9.01E-01;1.34E+00;1.43E+00;2.09E+00	38542;41563;50463;51824;57387;60308;60908	1.25E+00;8.89E-01;8.46E-01;5.95E-01;5.02E-01;4.62E-01;7.30E-01
DENND2D	-0.759001	0.560597	4	TTTGTACTCCAACCATGAAG;AGCATGGATGCACTGAGACA;ATCCACATTGGTCAGAACGA;ACCACCCCAGGACAATTCAG	-1.46;-1.17;-0.75;0.34	18043;22227;30514;60203	3.76E-01;6.00E-01;8.29E-01;4.37E-01	17239;46928;55215;59399	3.78E-01;4.66E-01;3.81E-01;4.61E-01
GAGE1	0.124763	1.95226	20	GAAGCTGATAGCCAGGAACA;GGAACCAGCAACTCAACGTC;TGAAGCTGATAGCCAGGAAC;GGATCCTGACGTTGAGTTGC;TCACTGAACTGCTCGGGCTG;AACAGGGTCACCCACAGACT;GAGTGTGAAGATGGTCCTGA;CTGAAATGATTGGGCCTATG;TTTCAGTGTGAAATATGAGT;GGATCCTGCAGCTGCTCAGG;ATAGGCCCAATCATTTCAGG;GGGTCCATCTCCTGCCCATC;GGAGGCTGTACATAGCGCCT;ATGGATTGCCTACCTTCTTC;ACCAGCAACACCTGAAGAAG;GAAGCCTGAAGCTGATAGCC;GTACAGCCTCCTGAAATGAT;GTTTAAGCACTCACCCGCAT;TGCAGCTGCTCAGGAGGGAG;…	-1.29;-0.77;-0.77;-0.47;-0.42;-0.16;-0.0;0.01;0.04;0.27;0.41;0.42;0.45;0.46;0.5;0.56;0.72;0.78;0.85;0.92	20226;29956;30147;37726;38948;46496;50851;51424;52449;58491;61764;62046;62614;62884;63746;65086;67750;68722;69789;70704	1.78E+00;2.37E+00;1.81E+00;2.20E+00;1.86E+00;2.32E+00;2.42E+00;2.01E+00;1.70E+00;2.07E+00;2.10E+00;1.67E+00;1.34E+00;1.03E+00;8.39E-01;7.11E-01;6.38E-01;5.52E-01;5.63E-01;7.91E-01	6738;7653;8720;9692;12356;13696;14558;14828;15396;15678;18951;24993;26018;26591;30946;38494;39716;47295;47486;57216	5.11E-01;5.45E-01;6.70E-01;8.54E-01;9.27E-01;1.11E+00;1.37E+00;1.75E+00;2.15E+00;2.65E+00;2.60E+00;2.15E+00;2.51E+00;3.01E+00;2.89E+00;2.37E+00;2.81E+00;2.40E+00;3.15E+00;2.63E+00
PPT1	-0.519955	0.54337	4	AAGGATCCTAAATTGCAGCA;TGTTGCAATCCCTTAAGCAT;GAGATCAGATTGATCATGGG;GCCAGTATTCGGCTTGCACG	-0.89;-0.75;-0.63;0.19	27451;30649;33331;56439	4.19E-01;4.65E-01;7.41E-01;5.50E-01	21003;44111;46793;49991	3.77E-01;4.43E-01;4.57E-01;7.60E-01
RABAC1	-0.0893731	0.709133	4	AGTACTCCACGTTGCGTACG;CTCACACACAGTACAGGATG;TCCAGGGCCGGATGGTCGCG;GGGAATCAGCTTCGGCAGCA	-1.7;-0.35;0.78;0.91	15206;41073;68759;70616	3.90E-01;4.29E-01;5.03E-01;1.60E-01	6826;8683;36369;62236	5.73E-01;1.23E+00;6.58E-01;3.80E-01
INPP4B	-0.472576	0.560276	7	GGAATCTCACTCTGTCACCC;GCCGAGGCGGGCAGATCACG;GGCTGTACATTCACATACCA;TCCTGCCTCAGCCTCCCGAG;TGACACCAGTCAAAAACAGT;TCATCATAGTCTGAATGATG;TTTCGCAGATTGTCCCAATG	-1.53;-1.31;-0.9;-0.4;0.02;0.32;0.48	17134;20055;27330;39519;51899;59823;63356	4.62E-01;5.02E-01;5.69E-01;5.55E-01;5.10E-01;4.71E-01;6.10E-01	14086;17619;25543;37923;50112;57387;60308	4.18E-01;5.24E-01;5.96E-01;5.73E-01;5.28E-01;5.23E-01;7.60E-01
INPP4A	-0.798841	0.699408	6	AGAGTGCATCATTCAGCGTG;GCCGAGGCGGGCAGATCACG;AAGTGAGTTACTACGCAGAG;CAAGGCAGGCAGATCACCTG;GTTCGTGAAGCTCCTACTAG;TGTCGATGAGAGCTTGACGG	-1.9;-1.31;-0.66;-0.53;-0.49;0.1	13397;20055;32607;35879;37005;54083	3.96E-01;5.18E-01;5.38E-01;7.01E-01;1.11E+00;9.35E-01	23359;40437;41563;44835;57387;64045	5.22E-01;6.71E-01;5.12E-01;5.25E-01;4.59E-01;4.95E-01
SAFB	-1.5074	1.16565	6	TGTGGCTCGAGATCGCTCTG;TAGCTCTCTACTATCCGACA;AAACGGAATGTGGACTCGAG;GAGAATCGCTTGAATCCGGG;CCACGGAAAGATGATCTCCG;TCCTGCCTCAGCCTCCCGAG	-2.42;-2.39;-1.74;-1.64;-0.45;-0.4	9478;9693;14839;15856;38125;39519	4.18E-01;8.61E-01;1.13E+00;1.78E+00;1.06E+00;1.75E+00	37923;39317;61585;62603;67749;67964	9.93E-01;6.44E-01;1.06E+00;6.29E-01;4.15E-01;3.40E-01
TRNP1	-0.581354	0.529475	5	GAGAATCGCTTGAATCCGGG;TGGAGCTGGCCGAAGCACGG;CCAGCTCCGACACCAGGCGC;GCTCGGCCGCCAAGAAAACG;AGGGCGCTAGCGGGATCGCG	-1.64;-0.84;-0.55;-0.0;0.13	15856;28475;35412;50848;54899	3.88E-01;4.66E-01;5.50E-01;4.96E-01;7.47E-01	22543;26594;42030;48967;61585	4.35E-01;4.76E-01;4.76E-01;5.32E-01;4.97E-01
UBOX5-AS1	-0.542155	0.708505	9	ACTTAGGCCGCAAAGTACCT;AAGGCCAGTACATTGCAGCT;GCTTCCATCGCGCCAAAAGG;GCGGTATCCCTTGTATCAAG;CGACAGTGTGCCACTCTAGG;CAAGGCAGGCAGATCACCTG;GGGACAAGGCATGATCTCCA;ATCTCTCTGAATTTGTCATG;AACCGCAGTGAAGCCACATG	-1.44;-1.08;-0.84;-0.83;-0.54;-0.53;-0.14;0.06;0.47	18276;23705;28481;28799;35673;35879;46786;52935;63278	6.08E-01;5.83E-01;5.74E-01;6.28E-01;6.55E-01;8.91E-01;7.81E-01;8.67E-01;7.90E-01	14164;24507;30656;41563;41769;48643;48961;53737;59166	4.85E-01;6.00E-01;5.96E-01;6.51E-01;5.87E-01;5.76E-01;7.06E-01;8.30E-01;1.05E+00
OR7E157P	-0.352701	0.451647	2	CATCTTGGGAACCATGGCCG;GATCCTCTGAGAGTCCCAGG	-0.44;-0.27	38453;43334	3.01E-01;5.04E-01	34108;38989	3.07E-01;5.96E-01
PPP1R26	-0.999076	0.640585	4	TTCAGACAGTGATGATTCCG;CCAGAGGGTCCAACTCCGAG;GGAACGGTCCTCGTGCCGGG;ACGTTCATCTTCGCTAACCG	-1.98;-1.45;-0.54;-0.03	12740;18080;35727;50129	4.16E-01;7.16E-01;6.75E-01;7.56E-01	27313;41715;59362;64702	4.17E-01;4.31E-01;3.76E-01;3.12E-01
PPP1R27	-0.986259	0.532278	4	TGACATTCACCAGCGAGATG;TGGGGCGCTTCATCCGGACT;TTCTTGGACCACATCCGGCA;AGAGAGCACGGCTTCATGCA	-2.79;-1.33;-0.46;0.63	6827;19668;38004;66255	5.73E-01;6.67E-01;6.18E-01;2.71E-01	11187;39438;57774;70612	4.41E-01;4.26E-01;3.75E-01;1.60E-01
PPP1R21	-1.15374	0.918027	7	CAGAACTGTAGTTTGTCCGA;TGAAGATGCGAGATATTGCT;GCCGAGGCGGGCAGATCACG;GAAGCATTCCTTCCTCAAGA;CAAGGCAGGCAGATCACCTG;TCCTGCCTCAGCCTCCCGAG;CTAGCTCTAAGTGAACCACG	-4.35;-2.41;-1.31;-1.03;-0.53;-0.4;1.96	172;9540;20055;24641;35879;39519;76380	1.81E+00;7.82E-01;7.37E-01;9.44E-01;8.89E-01;1.22E+00;4.19E-02	1062;37923;41563;52801;57387;67902;77270	1.05E+00;7.59E-01;6.03E-01;6.13E-01;5.02E-01;4.07E-01;6.72E-03
NGLY1	-2.17848	1.35968	4	TCAGCAATCGATTCCCAAGG;CATCCTATTTCATAAAGGAG;CAGCACACAAGGAACCGTCA;TGCTCTTCAGGAGAAAGCGT	-3.26;-2.93;-2.2;-0.33	3460;5748;11022;41620	8.07E-01;1.55E+00;2.00E+00;1.08E+00	35822;66420;71680;73986	5.42E-01;1.05E+00;6.27E-01;7.93E-02
LMX1A	-0.653567	0.472839	5	AGATGGTTCTCGGACGTTTG;GAGAATCGCTTGAATCCGGG;TGTTGTGGCTACAGGCAGAG;CTTGTCCCGGTAGAAGCAGG;ATCCTCCAAGCCCTGCAGGA	-2.12;-1.64;-0.68;0.44;0.73	11665;15856;32289;62534;67913	4.07E-01;6.76E-01;6.08E-01;3.88E-01;2.85E-01	9529;14908;45153;61585;65777	4.39E-01;7.10E-01;4.63E-01;3.88E-01;3.54E-01
ZCCHC24	-0.935362	0.558312	4	TTGAGATAGCTGGAGTGCAG;CAACAAAGGACACTACATCA;ATGTTGTTGAGGGAGCCATA;AGGCTCGCAAGCCCAGCAAG	-2.72;-0.68;-0.44;0.11	7287;32097;38405;54222	5.53E-01;4.52E-01;6.09E-01;6.19E-01	23220;39037;45345;70155	3.85E-01;4.26E-01;4.78E-01;1.72E-01
LMX1B	-1.22759	0.727478	5	CGCCCGCATCACGAACTCGG;TGTGAACGGCAGCTACGCAA;GAGAATCGCTTGAATCCGGG;CTCGTCGAAGCCTTGCCGAA;CACCGGAGTCGGACTCGTCG	-2.6;-2.37;-1.64;-0.0;0.48	8199;9843;15856;50735;63396	4.71E-01;9.69E-01;1.27E+00;4.98E-01;4.35E-01	14046;26707;61585;67599;69235	3.90E-01;4.76E-01;6.76E-01;4.33E-01;2.43E-01
OR6V1	0.0703606	0.747834	4	ATCAGAGTGCCATAGCGCAG;GGAGAGGACAGTGGGTACCA;GGTTACCAAGATCTCCAGCA;GTGAAGGTAATGACTTTGTG	-0.52;-0.45;0.28;0.97	36279;38217;58801;71267	5.51E-01;4.26E-01;3.75E-01;1.44E-01	6175;18641;39225;41163	6.05E-01;6.98E-01;5.91E-01;1.10E+00
MRGPRF	-0.0268808	0.68685	4	CCAGGACCCGGCACACGCTG;GCTGAAGAGGTAGCCCACAT;AGGCACATGGACATCTTCCT;ATGTAGTTCATGACGGCCGG	-0.98;-0.05;0.25;0.67	25562;49602;57850;67061	4.01E-01;4.97E-01;3.75E-01;2.50E-01	10381;19592;27840;51880	4.58E-01;6.69E-01;9.24E-01;6.96E-01
ABCE1	-2.20788	1.47651	4	CAATTGATAAGGCGCCAAAG;CCAAAACTTCACCTGGACGA;TTTCAGATATATCATTGTGG;AGTTGTCCTGTAGTTCGAAT	-3.68;-3.57;-1.55;-0.03	1413;1832;16883;49972	1.16E+00;2.49E+00;1.49E+00;7.61E-01	27470;60559;75610;76032	4.19E-01;7.59E-01;1.06E+00;3.19E-02
KCP	-1.26399	0.837987	4	GAATAAGGACCTGCAGACGA;AGGGGCAGCTTTATGAGGAG;TGGCACTTACCCCTGCAATG;GGCACCGGCAGATTCGGCAG	-2.07;-1.69;-0.91;-0.39	12036;15307;27141;39883	4.26E-01;8.21E-01;9.51E-01;1.15E+00	37559;50301;62135;65412	5.77E-01;5.07E-01;3.89E-01;2.93E-01
LOC107984160	0.544882	1.00241	3	CAAGGCAGGCAGATCACCTG;TGGAGTGATGAAAGACATCA;CACATATTCTAAAGCGTGAG	-0.53;0.13;2.04	35879;54830;76513	3.98E-01;3.57E-01;1.57E-02	929;22612;41563	1.45E+00;7.42E-01;8.11E-01
CNR1	-1.81143	1.1101	4	ACAGGTACATATCCATTCAC;GTTTGAACAGAAACACGTTG;GATGAACAGAAGCAGTACGC;ATGAGGAGAACATCCAGTGT	-2.95;-2.39;-1.4;-0.5	5554;9652;18788;36832	6.39E-01;1.15E+00;1.36E+00;1.29E+00	40610;58654;67788;71878	6.47E-01;6.93E-01;4.76E-01;1.30E-01
GBX2	-0.0843898	0.641608	4	GAGCGATGTGGACTACAGCT;AGGGAAAGACGAGTCAAAGG;CGGCGGTAACTTCGACAAGG;CCCGGCCATTTCGTCTACAC	-1.1;-0.15;0.24;0.67	23416;46604;57771;66968	3.87E-01;4.63E-01;3.75E-01;2.52E-01	10474;19671;30838;54026	4.56E-01;6.67E-01;8.18E-01;6.25E-01
GBX1	0.98973	1.52901	4	GGAAAAGTCTCTGAGAAGTG;CGGCCCGATTAGGGAGTCGA;GCCCCGCTAGCCTCTTTCGC;GGCCCGTAGAAAGCGTCGGG	0.05;0.19;0.31;3.41	52594;56569;59479;77313	1.05E+00;6.33E-01;3.76E-01;2.87E-03	129;17963;20873;24848	2.18E+00;7.20E-01;1.24E+00;1.97E+00
CNR2	-0.403049	0.556835	6	GGAATCTCACTCTGTCACCC;GACAGCAAGTCCATCCCATG;CAAGGCAGGCAGATCACCTG;AAGGATTACATGATCCTGAG;GCTGCATGCAAAGACCACAC;GCAGAGGTATCGGTCAATGG	-1.53;-0.76;-0.53;-0.25;0.09;0.57	17134;30249;35879;43718;53769;65123	4.20E-01;5.01E-01;5.12E-01;5.39E-01;5.29E-01;4.51E-01	12319;23673;33724;41563;47193;60308	3.96E-01;4.87E-01;5.27E-01;5.73E-01;7.06E-01;6.52E-01
GNL3L	-0.703523	0.435733	4	GCACGTGGACGCAGTTACGC;TGCCGTCAGAAAGTGCTCAG;TTATTACAAGGAGTTCCGTA;GTGCGCACCCACATTCGTGT	-2.78;-0.58;0.06;0.49	6896;34669;52859;63538	5.70E-01;4.36E-01;3.94E-01;3.44E-01	13904;24583;42773;70546	4.02E-01;5.50E-01;5.20E-01;1.62E-01
LOC107985786	-1.40855	0.61785	1	GAAAAAGATCTCGATACTTG	-1.41	18669	0.618	58773	0.12
OTULIN	-0.179025	0.616822	4	AAGAGTCCCTTACTCTGCTG;TGAACTATTCACAAATGAGG;ATTGCTTATACATGAAAGAG;ACCACGGACTCGCCGTATGG	-1.46;-0.97;0.21;1.51	17970;25799;56969;75124	3.76E-01;5.29E-01;3.76E-01;5.28E-02	2318;20473;51643;59473	9.61E-01;6.44E-01;4.03E-01;4.59E-01
TGS1	-1.68929	1.04915	5	TTGGTTTATTAACCCATGTG;AAAGACAGACCACATGCCAG;ATCTGTATCACAGCTTTGCG;CAAGGCAGGCAGATCACCTG;GCAGAATCACATGACAGCAA	-3.01;-2.9;-2.66;-0.53;0.65	5174;5975;7779;35879;66661	5.96E-01;1.33E+00;2.09E+00;9.08E-01;3.26E-01	10781;41563;69673;71460;72276	4.18E-01;5.43E-01;1.14E+00;5.53E-01;1.50E-01
ANKS1B	-0.126086	0.894413	12	TATGTCCATTTAAGGCTGCG;GGAATCTCACTCTGTCACCC;GCCGAGGCGGGCAGATCACG;CAAGGCAGGCAGATCACCTG;ATAAAGTCGCTCTCAAACAT;TCCTGCCTCAGCCTCCCGAG;GGTGTTAAACATGCCCATTG;ACAGAGTATTTAGAAGGCGT;CAGGAGTGGATCTCGGAATG;CTGCAGCGGCAACTGTACAA;ACTCTACGGACGGCTTAGAG;AAGATAAAAAGAGCGGCCCG	-2.19;-1.53;-1.31;-0.53;-0.43;-0.4;-0.24;-0.06;0.31;0.88;1.5;2.49	11092;17134;20055;35879;38773;39519;44119;49227;59535;70162;75101;76949	5.03E-01;5.77E-01;5.89E-01;8.04E-01;7.15E-01;6.48E-01;6.43E-01;6.34E-01;5.93E-01;6.63E-01;5.87E-01;3.32E-02	493;2341;7280;17907;28215;33323;37923;38669;41563;57387;60308;66350	1.15E+00;1.35E+00;1.12E+00;7.63E-01;6.71E-01;6.98E-01;7.33E-01;9.20E-01;1.09E+00;6.56E-01;7.71E-01;8.06E-01
ANKS1A	-0.410891	0.529436	5	GCTGCTGAAACTGTAACCAA;CCACAGAGGACGCTACCATG;GTCCACTCCAAGACCACAGG;GAACGATGCGCTGACCAACG;GTCAACATAAAAGATAACCA	-2.08;-0.52;-0.3;0.29;0.55	11947;36288;42460;58967;64779	4.04E-01;4.82E-01;4.73E-01;3.97E-01;3.88E-01	12663;18475;34982;41154;65495	3.98E-01;6.00E-01;5.57E-01;7.28E-01;3.64E-01
LOC107984788	-0.533336	0.334131	1	CAAGGCAGGCAGATCACCTG	-0.53	35879	0.334	41563	0.27
BMT2	0.477694	1.10302	5	AGGGCGAAGGTCGTATTGAA;CAAGGCAGGCAGATCACCTG;GATCTGGCGAGAACACTGTG;TCTTGCAGCAAATCCATCGC;ACTATGCATACCTCTACAGC	-2.91;-0.53;0.18;0.49;5.16	5887;35879;56127;63671;77423	5.57E-01;4.79E-01;5.40E-01;3.91E-01;5.05E-04	19;13771;21315;41563;71557	2.91E+00;7.55E-01;9.60E-01;7.16E-01;1.72E-01
LOC107984782	-1.30793	0.586748	1	GCCGAGGCGGGCAGATCACG	-1.31	20055	0.587	57387	0.13
ADAM10	-0.627346	0.685151	5	TTTCAACCTACGAATGAAGA;CCCATAAATACGGTCCTCAG;TTCCATCAATAACAGACCCA;TCCTGCCTCAGCCTCCCGAG;GGAAATGGAATGGTAGAACA	-1.09;-1.0;-0.41;-0.4;-0.23	23461;25269;39158;39519;44325	4.47E-01;4.87E-01;5.00E-01;7.80E-01;1.21E+00	33119;37923;38284;52173;53981	6.39E-01;4.97E-01;5.10E-01;4.74E-01;7.84E-01
ADAM11	-0.132125	0.606879	4	GCTCCACGTATTGCGAGGAG;GCTCATGGTCTACCGACGGG;TGGGAACTTGACTTACATCG;GTTCGAGCAGATGCGACAGT	-1.09;-0.2;0.08;0.69	23546;45258;53355;67263	3.87E-01;4.51E-01;3.91E-01;2.45E-01	10179;24087;32184;53896	4.63E-01;5.60E-01;7.75E-01;6.30E-01
ADAM12	-2.71016	1.94181	4	ACTGAACATTCGGATCGTGT;GGTGATCCTTATGGCAACTG;AAGCAATGGTACTTGCCCGG;TGCTGAATATTCGACTACAA	-4.02;-3.21;-2.84;-0.77	544;3749;6453;30162	1.56E+00;1.90E+00;2.67E+00;1.64E+00	47280;70983;73693;76898	8.41E-01;1.46E+00;7.78E-01;1.22E-02
ADAM15	-0.256916	0.558923	4	CTGTTGTCAAAATTGCCAGG;AGTGCCACTCGTACATTCAG;CTCCAGACAGCTAATACTCG;TGGATTCGCGAAATAATGGG	-1.12;-1.04;0.25;0.89	23025;24444;57867;70329	3.84E-01;5.53E-01;3.75E-01;1.67E-01	7113;19575;52998;54417	5.60E-01;6.69E-01;3.93E-01;6.13E-01
ADAM17	-0.0326393	0.777567	5	AATCAGAATCAACACAGATG;TCCTGCCTCAGCCTCCCGAG;ACAAAATTTCAAGGTCGTGG;CATCGCTTCTACAGATACAT;TGGTGAAAAGCACTACAACA	-2.21;-0.4;0.08;0.23;2.14	10979;39519;53370;57480;76653	4.15E-01;5.15E-01;5.00E-01;4.08E-01;2.22E-02	789;19962;24072;37923;66462	1.31E+00;5.66E-01;8.46E-01;8.33E-01;3.32E-01
ADAM18	-0.704293	0.487032	4	TATAACAGTCAATTTGAACT;AAAATCCCATTACCACACAC;AGTAAGTATGCTATGTCATG;AGTGCCTGCTATTGACAACT	-2.04;-0.85;-0.05;0.11	12263;28466;49567;54414	4.23E-01;4.89E-01;4.23E-01;6.13E-01	23028;27875;48976;65180	3.84E-01;4.97E-01;4.30E-01;2.99E-01
ADAM19	-0.549308	0.604685	5	CCTCTAAATAATCAGCCACG;ATGCCTCTAATTGTACCCTG;CAAGGCAGGCAGATCACCTG;TGCCCAGAGATGCGAAGTGT;GTCACGCTCAGCACTTGCCG	-1.15;-0.73;-0.53;-0.47;0.14	22553;30918;35879;37457;55219	4.35E-01;4.61E-01;5.43E-01;8.50E-01;7.34E-01	22223;39985;41563;46524;54889	4.31E-01;5.20E-01;4.79E-01;5.85E-01;7.47E-01
MEPE	-0.400244	0.502089	4	GAGTACTCTCAGCTTCACTT;AATGTTGTGTTGAATACGAT;ATAACATGCAACATATAATG;GAGGGCAGCAACGATATCAT	-1.05;-0.72;-0.0;0.18	24262;31158;50734;56132	3.92E-01;4.60E-01;4.11E-01;5.59E-01	21310;26708;46284;53180	3.78E-01;5.14E-01;4.64E-01;6.53E-01
HAGH	-0.218585	0.594807	4	GGACGCGGCGAGAAAGCACG;TCGGGACTGAAGGTGTACGG;TTTGCGGAAGAACCTGACCG;GAAGTTCTATGAAGGGACTG	-1.68;-0.28;0.44;0.64	15472;42957;62548;66429	3.88E-01;4.36E-01;3.92E-01;2.66E-01	11013;14894;34485;61970	4.45E-01;8.39E-01;7.08E-01;3.87E-01
GLYAT	0.291659	0.895158	4	GTGAGCATGGGTAACATCCA;GGAAACTTACCTGCTCCTGA;ACTGTCTTTCACATAAACCA;TGATGAGTTCTGGTGATCCA	-1.12;-0.02;0.2;2.1	23103;50196;56764;76607	3.85E-01;5.06E-01;3.76E-01;1.88E-02	835;20678;27246;54339	1.38E+00;6.39E-01;9.47E-01;6.15E-01
OPALIN	-1.99461	1.28968	4	TCAATTTCTGAAATTTCACA;GGCGGGCATACCATTGCTGG;TGACAATCCCAAGATATCTG;GCCCGCCGCTAATCCAAGAG	-3.43;-3.35;-0.6;-0.6	2496;2953;34151;34275	9.32E-01;2.09E+00;7.17E-01;1.42E+00	43167;43291;74485;74945	7.14E-01;4.38E-01;8.67E-01;5.69E-02
NEPRO	-2.57896	1.82096	4	ACTCCACCACTGGCTGACTG;TTTGTTTGGATTGCTTCAAG;GACAGTGCAGAACCCCGGCG;AGTCATCAGAATTTGATGTG	-3.62;-3.51;-2.47;-0.71	1621;2116;9112;31446	1.10E+00;2.37E+00;2.24E+00;1.57E+00	45996;68330;75326;75821	7.98E-01;1.19E+00;9.98E-01;3.67E-02
U2AF1L4	-0.57906	0.535647	4	CGTGGGCAACGTCTATGTCA;TGGCTGAACTCAGTAACCGC;GTAAAAAGAGCAGTTAACCC;TGTCGGCTTGTTGTGAAGCC	-2.95;-1.01;0.51;1.14	5544;25046;63962;72921	6.40E-01;5.42E-01;4.06E-01;1.04E-01	4521;13480;52396;71906	7.10E-01;9.07E-01;3.97E-01;1.29E-01
U2AF1L5	-1.54206	0.930665	4	CTCACCCCATCTCATACTGA;TGATTGACTTGAATAACCGT;GGTGGGGAACGTGTACGTCA;AAACAAACCTGGCTAAACGT	-2.99;-1.69;-1.15;-0.34	5339;15316;22595;41194	6.53E-01;8.21E-01;1.15E+00;1.10E+00	36248;54847;62126;72107	5.50E-01;5.91E-01;3.89E-01;1.24E-01
NDEL1	-1.25838	0.675527	4	CTTTGAACAAAGGCTAAACC;AGGTTAAAGGATGAAGCAAG;ACAGGAAGTAACTAGAAAGT;AAGATGATTTAAGTCAGACT	-3.45;-1.6;-0.35;0.37	2390;16312;40808;60991	9.49E-01;7.80E-01;5.58E-01;4.15E-01	16451;36634;61130;75050	3.82E-01;4.28E-01;3.83E-01;5.45E-02
SHANK3	-0.38471	0.561187	5	AGAACGACCTCACCTCGATG;CAAGGCAGGCAGATCACCTG;GGGATGGCAGATCCGCGCCG;GCCCGCTGCCGTATCCCGAG;TGGCGTTCAAACAATGACTG	-2.31;-0.53;-0.41;0.56;0.78	10218;35879;39130;64965;68763	4.26E-01;4.79E-01;5.01E-01;3.99E-01;2.58E-01	8679;12477;38312;41563;67224	4.58E-01;8.15E-01;5.10E-01;7.16E-01;3.07E-01
SHANK2	-0.619109	0.652108	9	GCAAGCCGGACTAAGGACCG;ACAGCAGACAGGCACACAGT;GGAATCTCACTCTGTCACCC;GCCGAGGCGGGCAGATCACG;TATCACACAGCCATCGTCGG;CAAGGCAGGCAGATCACCTG;TCCTGCCTCAGCCTCCCGAG;CCGCCGGAAACCATCCGATG;ACTCTGAAGACCTCTACAGT	-2.06;-1.6;-1.53;-1.31;-0.62;-0.53;-0.4;0.43;2.05	12091;16266;17134;20055;33758;35879;39519;62276;76525	4.42E-01;5.16E-01;6.93E-01;8.97E-01;6.97E-01;8.91E-01;1.11E+00;5.11E-01;4.65E-02	917;15166;37923;41563;43684;57387;60308;61176;65351	1.01E+00;5.22E-01;7.59E-01;6.51E-01;5.85E-01;6.17E-01;5.14E-01;5.43E-01;6.64E-01
SHANK1	-0.559679	0.581131	4	ACTCTTCCGGCATTATACCG;TACCATGACTCGGATTCGGG;GTGAACATGATCCGCCAAGG;TGTCGGCACCTCGATACAGG	-1.07;-0.66;-0.28;-0.23	23880;32792;42977;44257	3.89E-01;4.47E-01;5.17E-01;9.72E-01	33185;34465;44650;53562	4.95E-01;4.37E-01;4.89E-01;6.40E-01
PLAC8L1	0.228589	0.937836	4	ATCACAGCAATTGTCCAGAC;GTGGTGAAGCAGCCTGTTCG;ATGTCACACTCAAGACACAT;AAGGTGGACCCAGGTAACAA	-0.5;0.29;0.32;0.8	36885;58952;59836;69055	5.63E-01;7.03E-01;3.77E-01;1.99E-01	8387;17606;18490;40557	5.13E-01;7.32E-01;1.38E+00;1.12E+00
PCSK9	-0.346929	0.494631	4	GTGGTGACTTACCAGCCACG;GAGGTTGCCTGGCACCTACG;CCCTGCCCTCGATTTCCCGG;TCCTCGATGTAGTCGACATG	-1.34;-0.85;-0.08;0.88	19621;28326;48684;70262	3.75E-01;4.91E-01;4.33E-01;1.69E-01	7180;28758;49116;57821	5.58E-01;4.85E-01;4.28E-01;5.08E-01
LINC02210-CRHR1	-1.36187	1.17756	9	GCACTCGGAGTAATTCACGC;GTCGTAGTACAGCTTCCCAA;TGCTCACCTACTCCACTGAC;GTACTGAATGGTCTCAGACG;TAGCTGGACCACGAACCAGG;GGACACCATAGAAAAAGGCA;TACACCGACTACATCTACCA;CAAGGCAGGCAGATCACCTG;GAGCCGCAGAAAGAGGACAA	-2.71;-2.69;-2.21;-1.72;-1.57;-0.99;-0.71;-0.53;0.89	7390;7497;10963;15005;16582;25390;31468;35879;70352	4.15E-01;7.81E-01;1.02E+00;1.22E+00;1.66E+00;1.50E+00;1.63E+00;1.99E+00;3.75E-01	7090;41563;45974;52052;60860;62437;66479;69947;70059	4.18E-01;1.32E+00;1.10E+00;1.01E+00;1.10E+00;7.75E-01;6.06E-01;4.14E-01;3.92E-01
PCSK2	-0.95275	0.595175	4	TGCTCACCACACCGGCCTCG;CTTGTGGAGTTGCATAAAGG;GGATTTGACCGAAAAAAGCG;AACCAGTCATCTGTGTACCG	-2.97;-0.48;-0.33;-0.03	5408;37405;41636;49883	6.48E-01;4.27E-01;5.41E-01;7.64E-01	27559;35806;40037;72040	4.20E-01;4.31E-01;5.74E-01;1.26E-01
PCSK1	-0.698996	0.649083	4	GGCCAGCGGGTCATACTCAG;TCGTTTGTGGGATCATATCG;TACCATTGCTGATTCCACAT;GAGCACTTCTCAGCGTACCA	-1.24;-0.74;-0.43;-0.39	21123;30708;38665;39902	3.77E-01;4.64E-01;6.03E-01;1.15E+00	37540;38777;46734;56319	5.76E-01;4.26E-01;4.58E-01;5.53E-01
PCSK6	-0.591198	0.56149	5	GCCATCGCAGCACATGTGTG;GGAATCTCACTCTGTCACCC;CAAGAACAGTCGCTGCCGGT;ACAGCGCTGACGCAGATCCG;GCGCACGGGTACCTCAACTT	-3.15;-1.53;0.03;0.66;1.03	4184;17134;52096;66852;71932	6.65E-01;6.36E-01;4.87E-01;4.21E-01;1.60E-01	5510;10590;25346;60308;73258	5.77E-01;9.20E-01;8.00E-01;3.91E-01;1.21E-01
PCSK7	-0.486526	0.537896	5	TGACGTAGGATGCTAAGTAA;GCGATGTGCAGGAGAGATCG;TCCTGCCTCAGCCTCCCGAG;TCAGGCTGCCTTACAACATG;TGGGTGACTACCTATGGTGA	-1.67;-0.45;-0.4;-0.06;0.14	15532;38223;39519;49337;55157	3.88E-01;5.00E-01;4.97E-01;5.24E-01;7.37E-01	22285;28105;37923;39219;61910	4.31E-01;4.68E-01;5.15E-01;7.90E-01;4.86E-01
PCSK4	-0.367307	0.526627	4	TCACCTTGGTCACACCACGC;GTCTCACGTAGTTGGCCCAG;GCACCCGTGATGCAGGTCCG;GCTTTCAACGCCCGAATCGG	-1.98;-0.14;-0.09;0.74	12669;46861;48463;68202	4.17E-01;4.65E-01;4.36E-01;2.21E-01	9240;28979;30581;64773	4.87E-01;4.83E-01;8.27E-01;3.10E-01
PCSK5	0.102423	0.795555	4	GCAGTGCGAATTGTTTGCAG;ATATTCATGTCAGACTGGCA;GGAAGAGTGTTCATCCACGC;TATTGTCAGGACTTCCCGTG	-0.74;-0.37;0.72;0.8	30733;40372;67837;69078	4.58E-01;4.28E-01;4.77E-01;1.99E-01	8364;9605;37070;46709	5.13E-01;1.15E+00;6.41E-01;8.78E-01
FAM171A1	-0.610115	0.537173	6	GGAATCTCACTCTGTCACCC;GCTGGCGGCCGTGAGAAACG;CCGGGAGCTAAATTCCTGGG;CAAGGCAGGCAGATCACCTG;GGCGACGCCATCAGTCCCCG;ACAATGCCTATGTCGCGGCG	-1.53;-1.45;-0.95;-0.53;-0.04;0.84	17134;18114;26283;35879;49682;69682	4.20E-01;5.49E-01;6.47E-01;7.01E-01;6.31E-01;2.75E-01	7760;27760;41563;51159;59328;60308	4.50E-01;4.86E-01;5.12E-01;4.83E-01;4.31E-01;6.52E-01
MAEA	-1.1654	0.863605	4	GCGTTGCGGCTACTACAACA;CGCACGCCCTACCTTGTACG;CCAGGAGTACCCGACCCTCA;ATAAGAGACTGGACGCTGTG	-2.96;-2.94;-1.25;2.49	5485;5647;20956;76951	6.43E-01;1.56E+00;1.24E+00;1.10E-02	491;56486;71795;71957	1.60E+00;6.31E-01;6.34E-01;1.28E-01
TC2N	-0.99881	0.64228	5	GGGTTATACACATCATAGCT;AGTGAAGAGACTGTATGGAT;GCCGAGGCGGGCAGATCACG;ACAGAAACAGAAGTCAATGG;AGTTATCTTACATTCAACCC	-2.93;-2.58;-1.31;0.66;1.17	5733;8365;20055;66817;73156	5.65E-01;1.08E+00;1.02E+00;4.20E-01;1.24E-01	4286;10625;57387;69077;71709	6.57E-01;9.18E-01;5.64E-01;4.66E-01;1.67E-01
PLTP	-0.612719	0.580618	4	ATCACCATTCCGGACCTGCG;AAGCCACAGGATCCTTCATG;CTCTGTCTCCAGAATGCACG;AAATCACCAATGCCTCCTTG	-1.19;-0.65;-0.48;-0.13	21946;32848;37314;47154	3.80E-01;4.46E-01;6.35E-01;8.62E-01	30288;40128;44594;55496	4.52E-01;4.27E-01;4.89E-01;5.79E-01
DPYSL4	-0.861543	0.577449	4	TGCACGTGGACATCACCCGA;GATGGTCTGGGAGAAATGTG;CAGACACTCACAGATCATGG;CCTGGGATCTTACCTCCTCG	-2.85;-0.29;-0.27;-0.04	6361;42594;43350;49718	5.95E-01;4.35E-01;5.10E-01;7.70E-01	27724;34092;34848;71087	4.21E-01;4.38E-01;6.98E-01;1.49E-01
LOC105376107	-0.704473	0.68834	9	TCTTCAAAGCATTTAGAGTG;GCCGAGGCGGGCAGATCACG;AGGAGTCGGAAAGGAACTTG;CAAGGCAGGCAGATCACCTG;TCTTACACACCCGACAGACG;CTGATGGCCAGAATGTCGTG;ATAGACCCCAGAACGAGGCA;TGAGGGGCGTTCTAGGAGAA;AGAAATCTTCAAATCGAAAG	-3.42;-1.31;-0.75;-0.53;-0.53;-0.14;-0.08;0.2;0.22	2566;20055;30495;35879;36044;46821;48669;56637;57274	6.43E-01;5.28E-01;5.94E-01;5.87E-01;6.48E-01;5.96E-01;7.16E-01;7.04E-01;1.18E+00	20168;20805;28773;30621;41398;41563;46947;57387;74875	6.78E-01;5.36E-01;5.76E-01;6.04E-01;5.88E-01;7.00E-01;7.75E-01;6.74E-01;1.32E-01
LOC105376103	-0.533336	0.334131	1	CAAGGCAGGCAGATCACCTG	-0.53	35879	0.334	41563	0.27
SETBP1	-0.131244	0.702662	6	GGAATCTCACTCTGTCACCC;CAAGGCAGGCAGATCACCTG;TTCCGCAGATAGTGCCCAAG;ACCCGTTGCTCTATCTTCGT;TGTGAGCGAGTCCCACAGTG;CAGGAGGTGTGTCTAAGCCG	-1.53;-0.53;-0.3;0.07;0.1;1.4	17134;35879;42243;53321;54163;74637	4.20E-01;5.73E-01;5.16E-01;4.85E-01;5.20E-01;9.61E-02	2805;23279;24121;35199;41563;60308	7.43E-01;4.89E-01;7.05E-01;7.20E-01;9.07E-01;6.52E-01
SAMSN1	-0.618648	0.518821	5	GGAATGTTGAACAATAAAGT;GGAATCTCACTCTGTCACCC;ATTCTAAACTAGGCACATGA;AATCCGTATGCACTCTGGCA;TCCATGGATAGTCTCTACAG	-2.86;-1.53;-0.34;0.69;0.95	6271;17134;41190;67276;71102	5.39E-01;6.36E-01;4.82E-01;4.27E-01;1.85E-01	6340;10166;36252;60308;71182	5.36E-01;9.47E-01;5.37E-01;3.91E-01;1.83E-01
LOC105376108	-0.375825	0.647981	8	TTCCGGTGGTAAAGCAGATG;TGGGTACTAGGCAAGAACAG;GATCATTCCCAACACAACTT;TGTTACACACCCGACAGACA;TAACAGTCGACGAAAGAGGG;CCATGTTGGACAAAAACAGT;GTTAACAGGCTGTATGATGT;ATCAGGAATAGAGGACTAGG	-1.63;-1.23;-0.42;-0.42;-0.4;-0.03;0.11;1.01	15966;21190;39055;39087;39451;50094;54418;71731	4.85E-01;5.12E-01;6.68E-01;5.63E-01;6.44E-01;5.92E-01;6.96E-01;2.66E-01	5711;23024;27348;37991;38355;38387;56252;61476	4.62E-01;5.26E-01;5.54E-01;5.64E-01;6.68E-01;9.76E-01;6.32E-01;8.02E-01
LOC101060236	0.526108	0.769946	1	GAGTAAAGCTTCCGATAGAG	0.53	64289	0.0808	13153	0.77
FAM151B	-0.528293	0.569788	6	ATATCGGCATTAATCCATAC;GCCGAGGCGGGCAGATCACG;CAAGGCAGGCAGATCACCTG;GTGGTTAGCTGCATGATACC;AGGTACTGCTCACATGATAG;GGGGATGGGCCATAATTGGC	-3.34;-1.31;-0.53;-0.24;0.07;2.18	2980;20055;35879;44127;53228;76712	7.22E-01;5.18E-01;5.12E-01;5.34E-01;5.41E-01;2.46E-02	730;24214;33315;41563;57387;74462	1.27E+00;4.85E-01;5.31E-01;5.73E-01;4.59E-01;1.02E-01
FAM151A	-0.0202452	0.673872	4	TATCTACAGTGACAACACAC;AAACCAATGTACTACACGGG;CAACATGCTCATCTCAACTG;CAGGACGTACACCCAAGCCA	-0.84;-0.52;0.38;0.89	28644;36332;61086;70390	4.32E-01;4.29E-01;3.82E-01;1.66E-01	7052;16356;41110;48798	5.63E-01;7.79E-01;5.52E-01;8.02E-01
LOC101927947	-1.41824	0.818096	2	GGAATCTCACTCTGTCACCC;GCCGAGGCGGGCAGATCACG	-1.53;-1.31	17134;20055	4.63E-01;1.17E+00	57387;60308	4.16E-01;2.17E-01
PAXIP1	-1.08009	0.79227	4	TCTTCATAAATAATCAGACG;GTGATTCTGTCCGTTCAGTG;GTGCGTGCATCGACTCGTGA;GCACACAAGTTAATCAACCC	-2.0;-1.05;-0.66;-0.61	12558;24245;32645;33947	4.18E-01;5.57E-01;7.61E-01;1.43E+00	43495;44797;53197;64880	7.23E-01;4.48E-01;3.92E-01;3.07E-01
LINC02424	-1.30793	0.586748	1	GCCGAGGCGGGCAGATCACG	-1.31	20055	0.587	57387	0.13
GPAT2P1	-0.227687	0.601036	3	TGCAGAACCTCCTCTCAGGG;AGCGGCTCCACAAGCTACGT;GGCAACAGCGACCCACAAAG	-1.74;-0.53;1.58	14863;36074;75406	4.25E-01;4.59E-01;3.47E-02	2036;41368;62579	1.13E+00;3.99E-01;2.78E-01
USE1	-1.80049	1.26097	5	CCAGTACGTGGGAGCCCTAG;GCGGCTGCTATCCCGCTGCG;GCGGAGTGAGCTACTAGGCA;CAAGGCAGGCAGATCACCTG;GTGAAATCAGTGGAGTGGCA	-4.51;-2.34;-1.54;-0.53;-0.08	88;10010;17051;35879;48763	2.25E+00;9.57E-01;1.19E+00;9.08E-01;1.00E+00	28679;41563;60391;67432;77354	5.36E-01;5.43E-01;6.38E-01;4.30E-01;2.44E-03
CNRIP1	-0.766448	0.550944	4	GAAGTCTAAAGAGCCTGATG;TGGGACAAGCACACCACCAA;GGTGTGACCCCAACGAAGAG;CATCCAGCCTAATGACGGCC	-1.94;-0.78;-0.26;-0.08	13121;29742;43424;48580	4.11E-01;4.74E-01;5.09E-01;8.10E-01	28862;34018;47700;64321	4.34E-01;4.39E-01;4.45E-01;3.22E-01
ARMCX5-GPRASP2	-0.0456196	1.48071	17	AGGAAGCCCTCATTGGGACC;GACACATACAGTGACCTACA;AAAGACCAGTATGAAAACTG;GCCGAGGCGGGCAGATCACG;ACTGAGGTCCAAGTAATGGG;ACAAGAACCCAGGTTTGAGG;ATGAGTCTGTTAAGACACCC;CTAAACATCAGACTAATCCC;TTCAATCAAGGTCTCAACCA;ACAGTACTGACCCTAGACAT;AGTGGCCAGTGGCCAAGCAA;ATCAGTACTGACAAGTGGAG;CCAACCCCATGAAAAAGACC;AAAGTATGGGCCTAATCCGA;CCAGTACGCGGATCCGCCAA;TGAGTTCTATAAGCAGTCCT;TCCAGACCAGGAATCAACAT	-2.71;-2.49;-2.22;-1.31;-1.17;-0.64;-0.17;0.0;0.05;0.57;0.63;0.92;0.96;0.99;1.69;2.02;2.09	7365;9019;10878;20055;22214;33211;46095;51367;52571;65203;66312;70718;71229;71580;75760;76490;76594	4.86E-01;5.41E-01;6.45E-01;6.63E-01;6.82E-01;7.89E-01;1.22E+00;1.30E+00;1.07E+00;2.07E+00;1.70E+00;1.99E+00;1.48E+00;1.01E+00;1.34E+00;7.66E-01;8.12E-02	848;952;1682;5862;6213;6724;11130;12239;24871;26075;31347;44231;55228;57387;66559;68429;70077	8.07E-01;1.77E+00;2.29E+00;1.55E+00;2.12E+00;2.71E+00;2.28E+00;2.70E+00;1.40E+00;1.69E+00;1.58E+00;9.66E-01;7.01E-01;7.50E-01;5.57E-01;5.63E-01;7.38E-01
DTX3	-0.546822	0.531316	4	GCAACCAGCCCCAGAATGGG;TAGGTAGAGCCCATTTGGAG;GTGCCGGCATTCATTCTGCG;GACTGTGTCCAAGCCCGTGT	-3.13;-0.19;0.3;0.83	4314;45511;59319;69494	7.27E-01;4.53E-01;3.76E-01;1.88E-01	7948;18123;31931;73128	5.28E-01;7.15E-01;7.83E-01;9.96E-02
CDC34	-0.31709	0.549296	4	CGAGGGCGATCTATACAACT;CATCTTGGTCAGGAACCGAA;CCCAACACCTACTACGAGGG;TCAGGAGGGAGATCACACTC	-1.37;-0.19;0.05;0.24	19211;45430;52658;57775	3.75E-01;4.52E-01;3.95E-01;5.09E-01	19667;24784;32012;58231	3.75E-01;5.46E-01;7.81E-01;4.95E-01
CDC37	-1.35636	0.795869	4	TTGGTGCATTGACCTAGAGG;GACGCACCCCAACATCGACA;GCCCTCCATGTACTGGCGAT;GCTGGCCAAGAGCCTAAAGG	-2.39;-2.16;-1.37;0.5	9687;11306;19122;63861	4.75E-01;1.03E+00;1.34E+00;3.35E-01	13581;58322;66136;67753	4.05E-01;6.83E-01;4.39E-01;2.32E-01
OR2T34	-0.671604	0.574252	6	AAGCACTGATTTCACCCTCA;TCTTGGGCACAGTCACGCAT;GGGGAAGCTCATGGTAATGG;GTACGTGAGCATCTTATAGA;TCTCAGCAAAGAGTCCCGTG;GAGTCTCACAGAAAAAACTC	-1.75;-1.7;-0.48;-0.38;0.0;0.27	14805;15238;37380;40207;51212;58467	4.01E-01;6.17E-01;5.07E-01;5.99E-01;5.90E-01;7.32E-01	18975;26453;37235;40062;62204;62637	4.43E-01;4.83E-01;5.07E-01;6.02E-01;4.04E-01;5.53E-01
OR2T35	-0.384446	0.655802	7	CCATGAATAAGCAAACCCTG;ATGAGGAGAGGGTACCGTAG;GAGCAGAATCATGACCAAGT;TGTGCAAGACAACTTCAGCA;CACGCAGCAGGCATACATCA;CTACTGCAAAGAGAAGCCCG;TGGTCTTGTCCTTGGACAGG	-2.44;-1.61;-0.84;0.12;0.37;0.79;0.92	9347;16247;28554;54527;60817;68930;70699	4.08E-01;5.45E-01;5.55E-01;6.52E-01;5.39E-01;4.17E-01;2.77E-01	6743;8512;16625;22915;48888;61195;68095	4.52E-01;8.49E-01;8.80E-01;1.03E+00;5.43E-01;4.47E-01;3.91E-01
OR2T33	-0.342437	0.583252	5	TGAGGATGACCATGTCGTGT;CATGAGGGAATTGCCAAACA;AGCCAAACGCACCAGCACGG;AAACCAGCATCATGTCCATG;ACCACAATATGGGAAGCTCA	-1.07;-1.04;-0.81;-0.07;1.27	23886;24514;29267;49055;73914	4.53E-01;4.95E-01;6.80E-01;5.30E-01;1.01E-01	3528;28387;48175;52928;53556	7.23E-01;4.67E-01;4.64E-01;4.62E-01;8.01E-01
PROSER2-AS1	-1.83366	1.08267	4	CACCCCCGATCCCCCCAGGA;GATGACATCTTCAGGCTCGG;GACGATTGACTCCCTAGACG;TGGCGCAGAAGATTTCCGAG	-2.93;-2.88;-2.03;0.5	5775;6072;12349;63866	6.26E-01;1.50E+00;1.87E+00;3.35E-01	13576;65093;71364;71667	4.05E-01;9.67E-01;6.10E-01;1.35E-01
SPIN2A	0.129885	0.983868	7	AGCAGTGGAACACATGTTTG;AGCCGAAGGGCAACAAACCA;CAGCCCACGATGTTCCTGCG;ATATTTCACCAGATAAAGAG;TGTCATGTTTGCAGACCCAG;GAGATGAGCCCATCACGCAG;GTCTCCCAAAAGAAGCAGAG	-1.4;-0.46;-0.45;0.07;0.47;1.17;1.5	18813;37949;38200;53269;63088;73218;75096	4.95E-01;7.60E-01;5.58E-01;6.23E-01;5.87E-01;5.64E-01;9.35E-02	2346;4224;14354;24173;39242;39493;58629	7.54E-01;1.33E+00;1.01E+00;9.66E-01;7.68E-01;1.22E+00;8.46E-01
SPIN2B	0.286011	1.17851	7	AGCCGAAGGGCAACAAACCA;CAGCCCACGATGTTCCTGCG;AGCAGTGGAACATATGTTTG;ATATTTCACCAGATAAAGAG;TGTCATGTTTGCAGACCCAG;GAGATGAGCCCATCACGCAG;GTCTCCCAAAAGAAGCAGAG	-0.46;-0.45;-0.31;0.07;0.47;1.17;1.5	37949;38200;42213;53269;63088;73218;75096	1.22E+00;7.68E-01;6.15E-01;6.23E-01;5.87E-01;5.64E-01;9.35E-02	2346;4224;14354;24173;35229;39242;39493	7.54E-01;1.33E+00;1.01E+00;9.66E-01;9.15E-01;1.23E+00;2.05E+00
PGLS	-1.57195	0.883144	4	CGGGGTTAATGGTGATCACC;CGGCGTGATCGAAGGGCACG;TTCGCGCTCGGCCTGTCGGG;CAGCAGGTCGAAAACCGGGA	-3.58;-3.05;-0.23;0.57	1784;4899;44473;65201	1.07E+00;1.68E+00;4.91E-01;2.99E-01	12241;32969;72544;75659	4.23E-01;4.45E-01;6.82E-01;4.04E-02
LOC105374610	-0.371136	0.591096	4	AGATATGTTTGATGGCCGCT;GACCCGCATCGACCAAGATG;TCCTGGCTTCTCATCCACTG;GCTGCCGTCAGTTGTCAGCG	-0.67;-0.54;-0.2;-0.07	32495;35632;45183;48882	4.84E-01;4.32E-01;4.80E-01;7.99E-01	28560;32259;41810;44947	4.31E-01;4.50E-01;5.38E-01;9.45E-01
LOC105379220	-1.30793	0.586748	1	GCCGAGGCGGGCAGATCACG	-1.31	20055	0.587	57387	0.13
LOC105370500	-1.91689	1.50593	6	CATCATGAGCATCATAAGTG;CTGGAGATTACTCTGGAAGG;GGAATCTCACTCTGTCACCC;GATAAAGCAAAAATCAACCA;CACCTCGTCCAGGTCCACGT;CAAGGCAGGCAGATCACCTG	-3.95;-3.2;-1.53;-1.31;-0.98;-0.53	686;3849;17134;20040;25669;35879	1.29E+00;1.52E+00;9.90E-01;1.43E+00;1.79E+00;2.00E+00	41563;51773;57402;60308;73593;76756	1.16E+00;1.09E+00;8.50E-01;5.69E-01;6.36E-01;2.32E-02
LOC105370504	-1.03094	0.565474	2	GGAATCTCACTCTGTCACCC;CAAGGCAGGCAGATCACCTG	-1.53;-0.53	17134;35879	4.63E-01;6.68E-01	41563;60308	3.03E-01;2.17E-01
CCNA2	-1.15964	0.642398	4	GCCTGCGTTCACCATTCATG;ATTGACATGTCCATAGTATG;CTGAAGTCCGGGAACCCGCG;GTGGACTGGTTAGTTGAAGT	-2.69;-1.65;-0.88;0.58	7561;15779;27685;65323	5.42E-01;8.02E-01;9.30E-01;2.96E-01	12119;49758;61663;69887	4.25E-01;5.00E-01;3.86E-01;1.78E-01
DIAPH2	-0.25407	0.806488	11	GACGGTGTGATAATTCAGTT;TGCTGGTTAAAGAAACCCTG;GAGAATCGCTTGAATCCGGG;GCCGAGGCGGGCAGATCACG;CATCGTGGGGGTAATCAGAG;CAAGGCAGGCAGATCACCTG;TAGATTAAGTGATATTCCTG;TATGACCGCGAAACCAATCG;CAGATAGTGCTACACTGCAG;TTGCATCTCTCTCACACAGT;ACATATACTCCGACTGACAA	-2.22;-1.66;-1.64;-1.31;-0.81;-0.53;-0.43;0.18;0.74;0.99;3.9	10892;15682;15856;20055;29232;35879;38814;56094;68160;71532;77373	4.69E-01;5.31E-01;6.45E-01;7.40E-01;6.86E-01;6.91E-01;7.90E-01;5.82E-01;6.01E-01;4.21E-01;4.20E-03	69;5910;9282;21348;38628;41563;48210;57387;61585;61760;66550	2.01E+00;8.05E-01;9.90E-01;7.00E-01;6.46E-01;6.28E-01;6.15E-01;5.84E-01;5.33E-01;6.35E-01;7.24E-01
CCNA1	-0.838718	0.573967	4	ACAAACTCGTCTACTTCAGG;AAGCAGCCAGACATCACGGA;AAGAAAGCACTCCCTGACTG;AGATGAATCTACCAGCATAG	-2.03;-0.82;-0.49;-0.02	12360;29076;36982;50289	4.21E-01;4.82E-01;6.43E-01;7.50E-01	27153;40460;48366;65082	4.16E-01;4.28E-01;4.37E-01;3.02E-01
DYNC1I1	-1.19437	1.00786	6	TCGCAAACGACGAGAGACAG;GAGAATCGCTTGAATCCGGG;TGCAGTCAGACTCAGAACTT;AGTGCTCACTGATTTCGAGG;CAAGGCAGGCAGATCACCTG;GATGACTGCGATTGTCCCAG	-2.1;-1.64;-1.64;-0.74;-0.53;-0.51	11776;15856;15913;30792;35879;36498	3.98E-01;5.99E-01;1.06E+00;8.66E-01;1.16E+00;1.96E+00	40943;41563;46650;61529;61585;65675	1.13E+00;7.01E-01;5.61E-01;5.98E-01;4.08E-01;4.29E-01
VPS28	-3.08655	2.50295	4	AGGCACTCACGCGGAACTTG;TGTCCTCAGGTACGACAACA;ACGTGGGCTCTTACTCGCTG;AGACCACGTCTGCGATGCAG	-4.45;-3.61;-2.45;-1.84	110;1695;9271;13895	2.25E+00;2.56E+00;2.22E+00;2.98E+00	63547;68171;75749;77332	1.72E+00;1.18E+00;1.09E+00;2.45E-03
DYNC1I2	-2.21906	1.5255	4	CAACATTTACACAATATACA;AAGCATTGCTTCAAAGCATG;ACGTTGGTCAAAGCATCGGG;GTATTTACTTAATTTAGACG	-3.84;-2.31;-1.52;-1.2	966;10227;17232;21637	1.32E+00;1.10E+00;1.47E+00;2.22E+00	55805;60210;67215;76480	1.20E+00;7.46E-01;4.62E-01;2.17E-02
SKA1	-0.389958	0.624539	4	CATTACCTTGAGTGAATTGT;ACCTTATCATTAAGAAACTG;AATTTGATTATAGGTTAAGC;CTCTGGGTTACTGTTACTTG	-1.92;-0.87;-0.73;1.97	13204;27899;30973;76405	4.10E-01;4.97E-01;8.14E-01;2.34E-02	1037;46469;49543;64238	1.29E+00;4.61E-01;4.23E-01;3.25E-01
SKA3	-0.750339	0.587695	5	GAGAATCGCTTGAATCCGGG;AGTTCTACCAAACCCTCCAC;CAATGGGACTTAAAAATGCG;TCTGAAAGTTGTGGACTACG;TTTCACAATTAGACAACTCT	-1.64;-1.32;-0.96;-0.53;0.7	15856;19940;25977;35874;67504	3.88E-01;5.66E-01;7.78E-01;9.08E-01;2.98E-01	9938;41568;51465;57502;61585	4.31E-01;5.43E-01;4.81E-01;4.07E-01;4.97E-01
SKA2	-1.60882	1.01133	4	GGATTACATTCAATACAGGC;TCATCCTGATTCAGCAAGTG;GGTCGATAAGCTGGAACTGA;CAACAGCAACTGGTTTAAAG	-3.22;-1.48;-1.21;-0.53	3715;17673;21596;36006	7.81E-01;7.30E-01;1.20E+00;1.33E+00	41436;55846;59769;73725	6.67E-01;6.15E-01;3.77E-01;8.54E-02
GRID2IP	-1.09227	0.776274	5	AGCGGGTGGATGATCTGGTG;GCCGAGGCGGGCAGATCACG;ACTCGATCCAGACAGGCCCG;CAGACCCCATAGCGCTCAGG;CCAGACTGGGCGGCACACGT	-2.55;-1.31;-0.88;-0.39;-0.34	8630;20055;27598;39891;41334	4.59E-01;5.64E-01;7.27E-01;7.68E-01;1.36E+00	36108;37551;49844;57387;68812	7.23E-01;4.93E-01;4.70E-01;4.08E-01;2.57E-01
PCDH20	-0.926275	0.518252	4	AAACGAGGGACTACCCGCGG;CGTCCAGGGTGAACATACCA;GTGTATGGGAATGCTACAGT;TAACGAGGGACAATTTCAGG	-2.45;-1.82;0.01;0.56	9238;14068;51626;64957	4.87E-01;8.77E-01;4.03E-01;3.05E-01	12485;25816;63374;68204	4.20E-01;5.28E-01;4.00E-01;2.21E-01
MT1P1	-2.1288	1.10018	2	TGCTGCTCCTGCTGCCCTGT;CACACTTGGCACAGCCCACA	-2.28;-1.98	10493;12704	6.30E-01;1.57E+00	64738;66949	5.62E-01;1.26E-01
MT1P3	-1.17859	0.490669	2	GCAGCAGCTCTTCTTGCAGG;GGTGGCTCCTGCACGTGCGC	-2.76;0.41	6992;61733	7.84E-01;1.97E-01	15709;70450	4.90E-01;8.22E-02
C6orf89	-1.11277	0.992915	9	AGGGGCTGGAATTCTCGCAA;AAAGACTTCATGATCCAAGG;TCCAATCGGGCAGGTCGAGG;GCCGAGGCGGGCAGATCACG;TTATACACAACTATAAGGAG;GCTCGTCGAGGTTACTACAA;CAAGACGGGAAAGCCCCTGT;AGACAGACCGGCCATCAGTG;AGGACATCAGCCTAATGTGA	-3.05;-1.57;-1.51;-1.31;-1.25;-0.92;-0.38;-0.37;0.34	4915;16634;17309;20055;20946;26897;40005;40501;60123	4.71E-01;5.15E-01;6.87E-01;8.97E-01;1.29E+00;1.39E+00;1.08E+00;1.62E+00;9.89E-01	17319;36941;37437;50545;56496;57387;60133;60808;72527	5.76E-01;1.06E+00;7.44E-01;9.37E-01;8.56E-01;6.17E-01;5.14E-01;5.54E-01;2.56E-01
PPP1R13B	-0.0832312	0.694477	5	GGAATCTCACTCTGTCACCC;GCCGGCTGGTAATTCTTAGG;GATTCGTAACCAACTTAACC;AGACTGGAAGGATCCGAGCG;CAGGCCTGCCAAGTCGACAG	-1.53;-0.41;-0.05;0.57;1.01	17134;39384;49360;65111;71721	3.91E-01;5.13E-01;4.68E-01;4.00E-01;1.67E-01	5721;12331;28082;38058;60308	5.66E-01;8.22E-01;7.13E-01;8.29E-01;5.43E-01
PPP1R13L	0.240705	0.887043	5	GACCTTGTAATTGCGCGGCA;ACATGGCCCCCTGTGAACGA;TCCTGCCTCAGCCTCCCGAG;ACTCTCTGATCGTCCGAACG;GCGCGGCCCAGGAAGTCGAA	-1.06;-0.8;-0.4;0.33;3.14	24045;29377;39519;59972;77261	4.55E-01;4.63E-01;4.97E-01;3.92E-01;5.05E-03	181;17470;37923;48065;53397	1.94E+00;6.26E-01;5.15E-01;5.51E-01;8.07E-01
TMC5	0.399561	1.51656	4	TTAATGCAGGACACAACGAA;CATAATCCCTCAGTTTACCG;GCTAGACTCAAGCATCAACA;CACTCCTGTAGAGACAACCC	-2.76;0.85;1.3;2.2	7036;69831;74096;76729	5.64E-01;1.33E+00;8.20E-01;1.60E-02	713;3346;7611;70401	1.45E+00;1.99E+00;2.47E+00;1.66E-01
LOC107986788	-1.52854	0.655112	1	GGAATCTCACTCTGTCACCC	-1.53	17134	0.655	60308	0.109
LOC100128239	-1.30793	0.586748	1	GCCGAGGCGGGCAGATCACG	-1.31	20055	0.587	57387	0.13
LOC105373347	-0.399969	0.310068	1	TCCTGCCTCAGCCTCCCGAG	-0.4	39519	0.292	37923	0.31
WNT10A	-1.40052	0.824033	4	TGGTAAGGGCCTGAGCCATG;TGTGAAGCCTCATTCTCGCG;TTGGTGTTGGCATTCGTGGA;CAATGTTAGGCACACTGTGT	-2.63;-1.75;-1.35;0.13	8045;14741;19422;54815	5.24E-01;8.46E-01;1.33E+00;6.00E-01	22627;58020;62705;69407	3.83E-01;6.74E-01;3.94E-01;1.90E-01
WNT10B	-0.182042	0.761765	5	CACAGCGCCATCCTCAAGCG;GCGAATCCACAACAACAGGG;CAAGGCAGGCAGATCACCTG;GGGTGGCTGTAACCATGACA;GCGCGGACGCCGTCACGTCG	-2.83;-1.2;-0.53;-0.0;3.65	6484;21779;35879;50863;77352	5.30E-01;5.32E-01;5.43E-01;4.96E-01;2.50E-03	90;26578;41563;55663;70959	2.24E+00;4.77E-01;4.79E-01;4.26E-01;1.90E-01
OR4A4P	-1.91678	0.766395	1	GGGCTTCACACAGAATCCAA	-1.92	13261	0.766	64181	0.0816
OR4A47	-1.27641	0.697863	4	CATATCCTTCCAATCTTGCA;GGGCTTCACACAGAATCCAA;CCACTAAGAGGCCAATAGCA;ACAAGCCTGAAATCAATCTG	-3.51;-1.92;-0.6;0.93	2106;13261;34125;70776	9.99E-01;9.18E-01;7.18E-01;1.56E-01	6667;43317;64181;75337	5.80E-01;4.38E-01;4.09E-01;4.79E-02
HOGA1	-0.688557	0.565613	8	CAGCCCCACTTACCTCGGAA;GCACACGGCTCACCACCTCG;GCGGCCACGATAGTAGCAAG;GAAGGTCTCTATGTGAACCG;GAAGGATTCCCGGTGCAGAG;GTGGATCTCTTGGATCACTG;ACAGTGTCCCAGCCAACACA;GACAACAATGCCAGCGCTAG	-3.66;-2.33;-0.78;-0.37;-0.23;-0.05;0.87;1.04	1491;10087;29798;40297;44277;49465;70158;72068	8.71E-01;6.87E-01;5.51E-01;5.66E-01;5.71E-01;6.05E-01;4.24E-01;2.50E-01	5374;7284;27977;33165;37145;47644;67355;75950	4.74E-01;8.63E-01;5.52E-01;5.99E-01;6.98E-01;6.48E-01;4.06E-01;6.75E-02
LOC105377994	-0.388679	0.449727	2	TGAAGGTCAATGGATCCACC;GAAATCACTAGGAACTCCAG	-0.44;-0.34	38474;41279	3.01E-01;5.46E-01	36163;38968	3.03E-01;5.97E-01
LOC102724687	-1.74353	1.35823	6	CAGCTGCATCTTGTGCGCGC;GCGGTGCGCCGGACCCACGC;TGGAGGACCAGTTCGCCAAG;GGAATCTCACTCTGTCACCC;TACCGGACACCAGAGTAAGG;CAAGGCAGGCAGATCACCTG	-2.76;-2.68;-2.09;-1.53;-0.87;-0.53	7047;7628;11847;17134;27878;35879	4.70E-01;1.02E+00;1.36E+00;1.66E+00;1.63E+00;2.00E+00	41563;49565;60308;65594;69814;70396	1.16E+00;9.86E-01;9.90E-01;7.43E-01;4.54E-01;2.49E-01
TM4SF18	-1.94405	1.1519	4	AGCATACTCCCAGCCATCAA;GCGGAATCAGCAAACAACTT;ATAAACTCACCAACTACGTG;AAACTGCAGCAAAAAATATG	-3.61;-2.91;-1.21;-0.04	1662;5862;21443;49738	1.09E+00;1.53E+00;1.21E+00;7.69E-01	27704;55999;71569;75780	4.21E-01;6.19E-01;6.21E-01;3.77E-02
TM4SF19	-0.744037	0.466053	4	GATGTCACCTACCTGTTGAG;TACGGCTGCTTCAGTAAGAG;AGGAAGGAGGAGTGCCACGT;AACCCCGGACACTTACCATG	-3.14;-0.4;-0.04;0.6	4247;39467;49691;65765	7.32E-01;4.26E-01;4.22E-01;2.84E-01	11677;27751;37975;73195	4.33E-01;4.99E-01;6.19E-01;9.80E-02
FRG2EP	-0.0540956	0.618036	2	GAGAAGCACACACAAAGGCA;CTCCGACATAGCTCGCACAG	-1.26;1.15	20773;72987	4.06E-01;5.15E-02	4455;56669	9.65E-01;2.71E-01
TMEM35B	0.0944052	0.796322	4	TTCTTGATTCTGCTCATGAT;TGGTAGCCAAATACCTTCAG;CTCAGCAAACTGCACGAACA;CCTGAACTACCAAATAGCTG	-0.78;-0.74;-0.31;2.21	29840;30777;42056;76734	4.46E-01;4.63E-01;5.34E-01;1.59E-02	708;35386;46665;47602	1.45E+00;4.32E-01;4.59E-01;8.45E-01
TMEM35A	0.613811	1.48365	4	GCCTGGGCGTCCCAAAGATG;AAGGGTCATGACGATGCCAC;GAAAACAAAGAAGAGTCCCA;TTCACTTACCATCTCACTGT	0.32;0.42;0.73;0.99	59709;61938;68042;71504	1.43E+00;8.13E-01;4.82E-01;1.39E-01	5938;9400;15504;17733	6.17E-01;1.17E+00;1.59E+00;2.56E+00
LAMB1	-1.6283	1.0017	5	ATGTGCAGGCATAACACCAA;TGACTGCGACCCAGTGACTG;GAAGTATCTATACACACCCC;CAAGGCAGGCAGATCACCTG;ACGGAACTTAACGAACCCTG	-3.6;-3.15;-1.52;-0.53;0.67	1707;4166;17211;35879;66962	9.96E-01;1.61E+00;1.18E+00;9.08E-01;3.16E-01	10480;41563;60231;73276;75737	4.22E-01;5.43E-01;6.34E-01;6.66E-01;4.83E-02
LAMB3	-0.436358	0.470058	4	GTGTGCAAGGAGCATGTGCA;CTACTGCACCCAGTATGGCG;TGGGTGCGCAGCGATCAGCA;AGGCGTGCATTAGGCCTCTG	-1.26;-1.11;-0.07;0.69	20775;23265;48918;67297	3.76E-01;5.77E-01;4.30E-01;2.44E-01	10145;28524;54177;56667	4.64E-01;4.88E-01;3.86E-01;5.43E-01
LAMB2	-0.405206	0.517129	4	GCGCTGTTTACACCACACAG;ACAACCTACTCGACCCACGG;CACCGTCTTGAGAACCCATG;AGATAACAGGGTCTAACCTG	-0.94;-0.6;-0.56;0.48	26426;34173;35291;63292	4.09E-01;4.38E-01;6.86E-01;3.50E-01	14151;42151;43269;51016	3.99E-01;4.33E-01;5.12E-01;7.25E-01
ATP7A	-0.145438	0.843512	11	AGATGTGGCTGCCAGTGGTG;TGATCAGATGTGGCTGCCAG;ACCCTCCTATGAGAGTCCGA;CGACGCCGATCTGAGCCCGG;CAAGGCAGGCAGATCACCTG;GATCACTCTCTTCTGCACTG;AGGGTAGCTGATCTTCTGTG;CAATAGAGGCTGTATCACCG;AATTACAATCCATACCAAGA;AAATTCATAACAGACAATCC;CTTTACTCTCCATACAGGGG	-1.51;-1.28;-0.86;-0.76;-0.53;-0.18;-0.07;0.4;0.52;1.26;1.41	17296;20498;28138;30269;35879;45772;49017;61627;64177;73844;74698	7.07E-01;6.16E-01;6.70E-01;6.20E-01;6.28E-01;6.47E-01;6.13E-01;6.46E-01;5.27E-01;4.98E-01;1.72E-01	2744;3598;13265;15815;28425;31670;41563;47173;49304;56944;60146	5.66E-01;1.11E+00;7.34E-01;9.36E-01;7.03E-01;8.07E-01;7.10E-01;7.29E-01;9.04E-01;8.71E-01;1.21E+00
LAMB4	-0.103942	0.808758	4	TTTGAATTTCTATCTCTACG;CGACCACAAGAGGTTTACAC;CGGTGGCGCTTAGTCCGTAG;CTGTACGAGATGATTGTTCG	-1.91;0.4;0.53;0.57	13315;61496;64384;65118	4.08E-01;7.95E-01;4.12E-01;3.01E-01	12324;13058;15946;64134	4.22E-01;9.28E-01;1.56E+00;3.28E-01
CYSLTR1	0.446549	1.28009	5	CAAGGCAGGCAGATCACCTG;CATACAAAGCATAGGTGCTG;TGTGAACATAATAGACCACA;AGGTGGAATACACTTGATTG;AATACCTACACACACAAACC	-0.53;-0.24;0.76;1.1;1.15	35879;44094;68465;72536;72978	7.16E-01;5.87E-01;1.03E+00;6.13E-01;1.29E-01	4464;4906;8977;33348;41563	6.43E-01;1.48E+00;1.91E+00;1.01E+00;1.35E+00
MPHOSPH9	-0.761368	0.684732	5	ATTGAATAGCTGTAACCACC;GGAGGTTCAAGATCTAAACA;GGAATCTCACTCTGTCACCC;GATGAAGCTACCGTCACTGA;AGGCTCTAGAACAGAGTCCG	-2.64;-1.98;-1.53;1.04;1.3	7918;12685;17134;72072;74118	4.79E-01;8.04E-01;1.18E+00;5.85E-01;9.52E-02	3324;5370;60308;64753;69531	7.45E-01;1.41E+00;6.36E-01;3.97E-01;2.34E-01
MPHOSPH8	-1.25625	0.798377	4	CATAGACGATCACAAAACCA;GTCCACGGACTCAGCCGAGG;GAGAGAGCAGGGCAGGACAT;ATACATCGGATGATGATACC	-4.02;-1.78;0.38;0.39	559;14446;61139;61431	1.55E+00;8.60E-01;3.83E-01;4.02E-01	16011;16303;62996;76883	3.84E-01;7.81E-01;3.96E-01;1.26E-02
MPHOSPH6	-1.73696	1.31281	4	AAATCATTAGTGAAGAGCAC;ATATTTAATACCTCAACCTC;CAAGAATCTACTGCGCATGA;AGAGCTTAAAGAGAAAGAGT	-2.24;-1.75;-1.55;-1.41	10730;14746;16938;18694	4.51E-01;8.46E-01;1.49E+00;2.47E+00	58748;60504;62696;66712	1.37E+00;7.56E-01;3.93E-01;2.59E-01
ASTN2	-0.636084	0.761587	10	GCTACCTGGACATCTCCGAC;GCCGAGGCGGGCAGATCACG;GGCAGATGTAGCACTACTGG;CAAGGCAGGCAGATCACCTG;CTTGTATACGATAGTTACCA;GAAGCCCCGGACAGTTAACG;TGATACAGCTGGGCTCAGCG;CCCTACACGACACTTGAGAG;TTTATCATACAGTTGCGTGG;AACTCAGCTGACATTCTACA	-2.87;-1.31;-0.59;-0.53;-0.46;-0.42;-0.38;-0.26;-0.0;0.48	6153;20055;34365;35879;37969;38899;39941;43462;50752;63289	4.23E-01;5.62E-01;7.63E-01;6.36E-01;6.10E-01;6.84E-01;8.79E-01;1.07E+00;1.11E+00;8.76E-01	14153;26690;33980;37501;38543;39473;41563;43077;57387;71283	5.27E-01;7.40E-01;7.50E-01;6.63E-01;6.09E-01;6.72E-01;8.15E-01;1.09E+00;7.58E-01;3.60E-01
ASTN1	0.340271	1.05497	5	TGACGTGAGAGGAGCACACG;CAAGGCAGGCAGATCACCTG;TGATGATCCTGTATACTCGC;CCTTACACAATATTTCAGCG;AGGGCTGCAATGAAAAGTCG	-0.77;-0.53;0.51;0.72;1.77	30084;35879;63993;67805;75990	5.66E-01;4.79E-01;7.69E-01;4.37E-01;4.11E-02	1452;9637;13449;41563;47358	1.06E+00;9.83E-01;1.45E+00;7.16E-01;1.07E+00
MLF2	-0.197696	0.624247	4	ACCATCACCCGTATTGGAGT;ATGAGCCGTATGTTGTCAGG;CATTCCCAGCATCCCAAAGG;GTCCCGGATGTGATGCCCAA	-1.54;0.06;0.11;0.58	16996;52955;54214;65371	3.79E-01;5.52E-01;3.85E-01;2.94E-01	12071;23228;24487;60446	4.26E-01;5.77E-01;1.06E+00;4.30E-01
LOC105372121	-1.47456	0.830375	2	GAGAATCGCTTGAATCCGGG;GCCGAGGCGGGCAGATCACG	-1.64;-1.31	15856;20055	4.87E-01;1.17E+00	57387;61585	4.16E-01;1.99E-01
LOC105374976	-0.533336	0.334131	1	CAAGGCAGGCAGATCACCTG	-0.53	35879	0.334	41563	0.27
LOC105374970	-0.533336	0.334131	1	CAAGGCAGGCAGATCACCTG	-0.53	35879	0.334	41563	0.27
LOC105374971	-0.361729	0.597771	4	GGACGACGACAAGCCCACTG;CGCCCCCAAACGACCCAAGG;GGAAATCGAGAACAACCCCA;GACAAGCCGACCCACGCTGG	-2.32;-0.76;-0.31;1.94	10172;30412;42060;76332	4.63E-01;4.67E-01;5.33E-01;2.51E-02	1110;35382;47030;67270	1.26E+00;4.32E-01;4.54E-01;2.45E-01
LOC729159	-1.30732	0.730874	4	CCTGAGGTGTCCAAACATCG;TGTCTTAGCCCTCAGAACAC;GAAATGGCCCCAGATTCCCC;TCACGGACAAGACGAGCAGG	-3.52;-1.33;-0.79;0.4	2062;19796;29664;61700	1.01E+00;6.63E-01;8.58E-01;3.95E-01	15742;47778;57646;75380	3.86E-01;4.75E-01;3.75E-01;4.69E-02
LOC105374978	-1.52854	0.655112	1	GGAATCTCACTCTGTCACCC	-1.53	17134	0.655	60308	0.109
MGP	-0.303848	0.597625	4	CAAAGTTACTACCGCTAAGG;TCCCTATTGAGCTCGTGGAC;GCGGTAGTAACTTTGTGTTA;GGAGAGCTAAAGTCCAAGAG	-1.42;-0.01;0.09;0.12	18557;50673;53624;54660	3.75E-01;5.13E-01;3.89E-01;6.05E-01	22782;23818;26769;58885	3.83E-01;5.65E-01;9.66E-01;4.76E-01
HS3ST3B1	-0.702336	0.529115	4	ATGTTCCTGTACTCGTGCGC;TCAGGCAAGGAGATGGCCGA;ATCATCGGCGTGAAGAAGGG;TAGCTGCGATCGAAGAAATG	-2.85;-0.09;0.05;0.08	6347;48469;52631;53502	5.96E-01;4.83E-01;3.95E-01;6.42E-01	23940;24811;28973;71105	3.90E-01;5.46E-01;8.82E-01;1.48E-01
ADSS	-0.892347	0.525012	4	TTTGGATTAATTATTCCACT;TGACAGAGCTCATATTGGTA;AATTTGAAGAGGTTACAAAA;CAGCTTTGGACGAATAAACT	-2.45;-1.1;-0.71;0.69	9248;23332;31514;67372	4.87E-01;5.75E-01;7.96E-01;2.42E-01	10070;45928;54110;68188	4.65E-01;4.57E-01;3.86E-01;2.21E-01
SAMD4A	-0.404232	0.558765	5	ACCGTCCAGGACATCATCGA;GCCGAGGCGGGCAGATCACG;AGGCAGATGAGTTAACAGGA;CTGATGACAAGCTCAATGGG;CATCAGTGAGGGCTGACGCG	-1.49;-1.31;-0.38;-0.29;1.44	17599;20055;40179;42687;74816	3.92E-01;5.64E-01;4.90E-01;6.84E-01;7.49E-02	2626;34755;37263;57387;59843	8.31E-01;4.72E-01;5.23E-01;4.08E-01;5.60E-01
ADSL	-1.89587	1.27791	5	AAATGTGTGAAACCTAATGT;CAGCAACGTTCTGAACGCAT;GGTATAAATTCCGGACATGG;GCCGAGGCGGGCAGATCACG;TATTGAAGTACTGTCTGTGC	-2.94;-2.86;-2.3;-1.31;-0.07	5664;6253;10355;20055;48845	5.69E-01;1.30E+00;1.75E+00;1.78E+00;1.00E+00	28597;57387;67084;71196;71789	5.34E-01;1.02E+00;9.35E-01;5.41E-01;1.65E-01
SAMD4B	-1.85054	1.70421	9	CAGCAAACCCCGAGTCACAC;ACCATTGGGGTCGATGCGGT;TTATCACAGAACGTCACCAA;CCAATACTGTTGATGGCTGG;CATCTCCAATGAGAAGCCTG;AGCATTGCTCTCGATTGAGT;CAAGGCAGGCAGATCACCTG;AGACGTTGAAGAAACGAAAG;CCTTGACGTGAATGGTAGGA	-3.8;-3.29;-3.26;-3.1;-1.02;-0.92;-0.53;-0.5;-0.24	1049;3303;3470;4547;24795;26943;35879;36743;44151	9.61E-01;1.32E+00;2.24E+00;2.96E+00;1.04E+00;1.38E+00;1.32E+00;1.92E+00;2.20E+00	33291;40699;41563;50499;52647;72895;73974;74132;76393	1.36E+00;1.27E+00;8.91E-01;9.35E-01;7.16E-01;1.93E+00;1.28E+00;5.67E-01;5.33E-02
PLA2G15	0.44316	1.19072	4	TGTACATGTTGCCCATACTG;GGTTTACAACAAAACATCCA;GTTGGTTACCCAAATCACCA;GGGCGCACCCAGTGACACGA	-0.13;0.26;0.8;0.84	47203;58167;69146;69679	8.38E-01;6.78E-01;5.16E-01;1.83E-01	7763;8296;19275;30239	5.34E-01;1.26E+00;1.33E+00;1.63E+00
GAS2L1	-0.751976	0.535498	4	TGATCATGGGAAACTGGTCA;GGTACCCGCAGTGATGACAC;GGTGCTCATGTTTGAGACTG;GCTTACGAAGCACAAAGGAG	-1.68;-1.1;-0.84;0.61	15499;23289;28532;65921	3.88E-01;5.76E-01;8.98E-01;2.80E-01	11521;48910;54153;61943	4.35E-01;4.88E-01;3.86E-01;3.88E-01
ACVR1C	-0.276528	0.586072	5	GCCGAGGCGGGCAGATCACG;ATTGTCCTTTGAACCAACAG;CTGGCGCTCTCAATTGCTAG;TGTAGGAGCACTGTCGACCC;CCAAGATCTTTCATCTCTGG	-1.31;-0.77;-0.71;0.44;0.96	20055;30103;31520;62593;71177	4.08E-01;4.62E-01;6.25E-01;3.88E-01;1.83E-01	6265;14849;45922;47339;57387	5.40E-01;7.12E-01;4.62E-01;5.66E-01;6.51E-01
GAS2L3	-0.560086	0.646638	4	ATGTTTGTCAGTACGATGAG;CCAGCATCTTCACTGAAAGG;CAAACTGTAATATTCGACAG;TGAAGGACGGTACCGACTAG	-4.01;-0.66;0.07;2.36	567;32634;53304;76856	1.54E+00;4.48E-01;3.91E-01;1.32E-02	586;24138;44808;76875	1.53E+00;5.59E-01;4.86E-01;1.27E-02
GAS2L2	-0.409164	0.511063	4	CCCCTACACGTACCATCACA;CCCACTAAGGGCCGTCACTG;AGAGGTGCTGATGTTCGAGA;TCGGCTGGGCCAAAGGAACG	-0.99;-0.83;-0.56;0.75	25400;28743;35200;68241	4.00E-01;4.86E-01;6.88E-01;2.20E-01	9201;42242;48699;52042	4.88E-01;4.33E-01;4.33E-01;6.90E-01
HPGDS	-0.896522	0.570089	4	AGATATTTGACCAAAAACAC;ACAGAATAGAACAAGCTGAC;TCCAAGTCTTGCATAAGATG;ATCTTGCTATTGCTAGGCTC	-2.19;-1.51;-0.93;1.04	11131;17322;26666;72065	4.43E-01;7.43E-01;9.70E-01;1.25E-01	5377;50776;60120;66311	6.50E-01;5.15E-01;3.78E-01;2.70E-01
RPS15AP1	-1.6703	0.881931	2	ATCAACAATGCCGAAAAGAG;TGACGTGCAACTCAAAGACC	-1.99;-1.35	12589;19478	5.65E-01;1.20E+00	57964;64853	4.24E-01;1.54E-01
ZW10	-1.40751	0.921723	5	GACTCACTGATACGGCATGT;CACTGAACAATCGCACAAAG;GCCGAGGCGGGCAGATCACG;AAAGTGCCAGGATGTGATTG;TTGATACGTGAAGATCCCGG	-3.57;-1.61;-1.31;-1.15;0.6	1812;16241;20055;22533;65711	9.73E-01;6.63E-01;1.02E+00;1.60E+00;3.57E-01	11730;54909;57387;61201;75627	4.06E-01;9.07E-01;5.64E-01;3.88E-01;5.15E-02
RSRC1	-0.9545	0.565622	5	CTATCATAAGAATGTGAACG;GCCGAGGCGGGCAGATCACG;ACTATCTGAAGAACTGCTCG;GAATTACATAACATCAAACG;GGAAATCCTATAGAGTTCAG	-3.31;-1.31;-0.77;-0.11;0.73	3149;20055;30043;47738;67995	7.64E-01;5.64E-01;6.60E-01;5.58E-01;2.82E-01	9447;29704;47399;57387;74293	4.41E-01;4.63E-01;4.62E-01;4.08E-01;9.01E-02
RSRC2	-0.353161	0.58274	4	GAAGCAGGGAAAGAAAACGG;CAAGATCTAGGTCTCGTGAA;CTCTAAGAAACATAAGTCTG;GACAAGGAGTAGGAGTCGGT	-2.37;-0.85;0.26;1.54	9859;28375;58259;75257	4.70E-01;4.90E-01;3.75E-01;4.97E-02	2185;19183;49067;67584	9.85E-01;6.81E-01;4.29E-01;2.37E-01
LOC107985077	-0.0921166	0.424541	1	GAAAGGACTTCTCAGTACAC	-0.09	48306	0.205	29136	0.425
CPN2	-0.313749	0.504136	4	TTGTGACTGCTTCGTCCAGG;CAGTAACCCCAACTTGACCA;ATGAGAGCATGAGGGAACGC;TCAGAAAGGTCAGATTACCC	-1.2;-0.56;-0.03;0.54	21628;35288;49908;64583	3.79E-01;4.33E-01;4.19E-01;3.15E-01	12859;27534;42154;55814	4.14E-01;5.02E-01;5.32E-01;5.69E-01
CPN1	-0.925554	0.687911	5	CGAATGCCCCGGCATCACGC;GGAATCTCACTCTGTCACCC;GCTGTCGGAGTTTCTGTGCG;GCTCAAAGGACTTGTCATAC;TACTATAACGAGAAGTACGG	-1.73;-1.53;-1.05;-0.48;0.15	14984;17134;24359;37258;55494	3.88E-01;6.36E-01;8.35E-01;8.57E-01;7.24E-01	21948;40184;53083;60308;62458	4.28E-01;5.23E-01;4.97E-01;3.91E-01;4.67E-01
LOC107985070	0.194673	1.22404	8	ACATGCAAAGCCTCGGCCGT;CCAGACCTTGACAGTCTACG;TCCAGATCAACAGCCACTAC;CCAAGTCACAGCGACTGATG;GTGTTCCAAAAGGATCATCA;ACTTGCTTTCCACAAAAGCC;GAGCCCAAAAGGCATGCGAC;TTAATGACGGCATAGAAACC	-1.38;-0.45;-0.3;0.42;0.58;0.67;0.77;1.25	19099;38124;42491;61923;65298;66922;68607;73766	5.66E-01;9.35E-01;7.61E-01;1.34E+00;1.04E+00;6.67E-01;4.08E-01;1.69E-01	3676;8835;10520;12144;15519;34951;39318;58343	5.68E-01;7.54E-01;1.17E+00;1.67E+00;2.03E+00;1.15E+00;1.47E+00;9.84E-01
CDADC1	-1.02897	0.684329	4	GGTAAAGAGAACTGGTCTTG;TTGAAGTAAGACACACACAT;AGATTGCTCTTATTAAACAT;TAATCTGTTCTGGATTGCTA	-2.51;-0.69;-0.59;-0.33	8858;32003;34449;41635	4.98E-01;4.53E-01;7.09E-01;1.08E+00	35807;42993;45439;68584	5.42E-01;4.37E-01;4.76E-01;2.11E-01
GABBR1	-0.412068	0.582807	4	ACGGCGCGCAGTGTACATCG;CTGAGGTCTTCACTTCGGTG;AGATTGAGTATGTGTGCCGG;CATTACCGACCAAATCTACC	-0.74;-0.51;-0.25;-0.14	30825;36408;43666;46854	4.59E-01;4.29E-01;5.05E-01;8.73E-01	30588;33776;41034;46617	4.56E-01;4.40E-01;5.53E-01;8.82E-01
NLGN2	0.103189	0.764751	4	GCTCACAAAAAAACGTGACG;GTCAGTAAAGAGCGCCAGCA;CAAAGATGGTGATACGCTCG;CCCAAGACGGTAGTTGAGCG	-0.86;-0.37;-0.16;1.8	28245;40489;46326;76051	4.27E-01;4.28E-01;4.63E-01;3.15E-02	1391;31116;36953;49197	1.17E+00;4.60E-01;6.44E-01;7.88E-01
OR2K2	-1.09369	0.69914	4	CCATGAAAGAGAGATTTCCA;TCGATGAGATTCCCACAGAG;TGAACAGGTGCGTCTGTGCA;GCGTTGTCAGATACATTACA	-4.05;-0.89;-0.28;0.85	504;27495;42820;69745	1.59E+00;5.02E-01;5.20E-01;1.82E-01	7697;34622;49947;76940	5.37E-01;4.36E-01;4.19E-01;1.13E-02
ARHGAP45	-0.667265	0.57813	5	GGGACTTTAAGAAGTTCGAG;TCCTGCCTCAGCCTCCCGAG;GAGCGACCAAACCATCAAGT;GTACCCGCTGCTGAACACCG;CGACAAGGCTCGCTTCCTCG	-2.89;-0.4;-0.06;-0.03;0.04	6028;39519;49290;49934;52476	5.51E-01;5.15E-01;4.68E-01;5.13E-01;8.45E-01	24966;27508;28152;37923;71404	4.69E-01;4.71E-01;7.11E-01;8.33E-01;1.76E-01
ARHGAP44	-0.878557	0.729335	7	TGGTCACACACGCCTCGATG;AACAATTTGCAGCGACACTG;GCCGAGGCGGGCAGATCACG;TACAGCCTGCAATAGTGTCA;CAAGGCAGGCAGATCACCTG;TCCTGCCTCAGCCTCCCGAG;GAGGGTCATGGACACAAACT	-2.13;-1.58;-1.31;-0.62;-0.53;-0.4;0.43	11564;16533;20055;33547;35879;39519;62125	4.02E-01;5.40E-01;7.37E-01;6.49E-01;8.89E-01;1.22E+00;6.70E-01	15317;37923;41563;43895;57387;60909;65878	4.33E-01;7.59E-01;6.03E-01;5.32E-01;5.02E-01;4.51E-01;4.92E-01
ZNF733P	-1.01847	0.571482	4	AATGCCTGGATTGTGCTCAG;CTTGTGGTTAGTAAGTGCTG;CAAGGCAGGCAGATCACCTG;ATACTGGAGAGAAACCCTGC	-3.19;-0.78;-0.53;0.43	3906;29879;35879;62217	7.63E-01;4.72E-01;6.71E-01;3.80E-01	15225;41563;47563;73528	3.90E-01;4.31E-01;4.47E-01;9.01E-02
CASQ1	0.0464325	1.0051	4	AGACAAGCCCAATAGCGAAG;CTCACAAAGACAATTTGAGA;GAGAACCTTGCTGTCGAAGG;GCTAGGGACACCCAAGTCAG	-2.64;0.23;0.97;1.63	7968;57362;71333;75565	5.27E-01;6.55E-01;6.08E-01;4.26E-02	1877;6109;20080;69466	1.05E+00;1.50E+00;1.29E+00;1.89E-01
ARHGAP40	-0.607346	0.625556	4	TGTCAAGGGGCACACCAAAG;CCAAACCATTACCTTGACCC;TCAGCCGTGAGCAAAGGTGT;TGGCGACTCCGGTATGAAGG	-3.89;0.0;0.48;0.98	815;51290;63403;71440	1.39E+00;5.23E-01;4.00E-01;1.40E-01	6002;14039;26152;76627	6.14E-01;8.79E-01;9.91E-01;1.84E-02
ARHGAP42	0.0912893	1.07419	9	GCCGAGGCGGGCAGATCACG;TTAGGACTCTACCGAATAGG;TGATGATCAAAACTACAGGG;TCTGCGAATCAACAGGAGAC;AATAGCAATGTGTACCCTAA;CAGGTCACGAAAAAGAACAC;GTTTCTGTTTACTTAAGACA;TCACATCACTGCGTAGGACC;AAAGGAGTCTCATTTACAAG	-1.31;-0.79;-0.41;0.0;0.15;0.27;0.65;1.11;1.14	20055;29724;39283;50887;55325;58450;66569;72711;72947	6.74E-01;7.48E-01;8.04E-01;9.53E-01;8.07E-01;6.40E-01;6.09E-01;4.79E-01;2.34E-01	4495;4731;10873;18992;22116;26321;38159;47718;57387	4.90E-01;1.06E+00;1.03E+00;9.52E-01;1.21E+00;1.43E+00;1.18E+00;1.14E+00;1.17E+00
NLGN1	-0.754117	0.715765	8	GAGAATCGCTTGAATCCGGG;GGAATCTCACTCTGTCACCC;GCCGAGGCGGGCAGATCACG;CAAAGTTGGTAGCCACCAGT;TAAAAGGCATAGAAGTACGT;CAAGGCAGGCAGATCACCTG;AATGTTAGGAGTGAACCAAG;AAGTTATTAGTAAACCACAC	-1.64;-1.53;-1.31;-1.02;-0.67;-0.53;0.05;0.61	15856;17134;20055;24903;32518;35879;52743;65875	4.82E-01;5.15E-01;6.63E-01;8.00E-01;8.46E-01;1.10E+00;7.61E-01;5.62E-01	11567;24699;41563;44924;52539;57387;60308;61585	4.14E-01;5.46E-01;7.33E-01;6.08E-01;5.72E-01;5.07E-01;5.12E-01;7.96E-01
PCBP1-AS1	-1.12327	0.741381	3	GGAATCTCACTCTGTCACCC;GCCGAGGCGGGCAGATCACG;CAAGGCAGGCAGATCACCTG	-1.53;-1.31;-0.53	17134;20055;35879	3.95E-01;8.27E-01;1.00E+00	41563;57387;60308	4.61E-01;3.70E-01;3.26E-01
AGAP12P	-1.6289	1.41342	6	GGTGACTGTTGAAGTTGGTG;CGTGACCGGGAGATGCCTGA;GTGGGAGGAACACTGAACTG;GGTGTCAGCATGATTCTCCG;GCCGAGGCGGGCAGATCACG;TTTCTTCATAATGTGCACGG	-2.3;-2.15;-1.87;-1.56;-1.31;-0.59	10354;11425;13627;16747;20055;34418	4.07E-01;7.63E-01;1.21E+00;1.70E+00;2.29E+00;2.11E+00	43024;57387;60695;63807;66007;67083	1.24E+00;1.43E+00;1.01E+00;6.69E-01;4.00E-01;3.74E-01
TNNT1	-0.672396	0.44403	4	TCGATGTACATTTCGAGCAG;AAGAGGAACGCCCCAAACCA;AGCGTGGTAAGCGGCAGACG;CGAACGTCAGGCTAAGCTGG	-2.12;-0.76;-0.26;0.45	11668;30345;43498;62650	4.33E-01;4.68E-01;5.08E-01;3.68E-01	14792;33944;47097;65774	3.93E-01;4.39E-01;4.53E-01;2.84E-01
CDC42EP3	-0.245269	0.571841	4	GTGGCGAAAGTCTCCAAGCG;GGATCCTCCAATGGTCGGGA;GAGAATGGGACAGTCCACCA;GGAAGAACTCATTATGCCCA	-1.52;-0.07;-0.05;0.65	17207;49057;49560;66690	3.79E-01;4.90E-01;4.23E-01;2.60E-01	10752;27882;28385;60235	4.50E-01;4.97E-01;9.04E-01;4.36E-01
CDC42EP2	0.348978	1.0564	4	CTGAAGCGTGGCAGTCGCAA;GAGCTCCCGCCCACACACGG;CATGATCAGCCCACCGCTGG;GGGGTCCACCGATAACCGGG	-0.13;0.1;0.5;0.93	47158;54109;63747;70815	8.37E-01;5.75E-01;4.04E-01;1.55E-01	6627;13695;23333;30284	5.82E-01;8.96E-01;1.12E+00;1.63E+00
CDC42EP1	-0.983199	0.913481	4	CATGATCAGCCACCCACTCG;TCCTTCCTCAGCAACCACGG;AAAGCCGCATGACCGAGACC;GCCAACCACGAGGCTGTCGT	-3.48;-3.19;1.23;1.51	2268;3917;73606;75142	9.70E-01;1.86E+00;7.69E-01;5.24E-02	2300;3836;73525;75176	9.64E-01;1.88E+00;7.62E-01;5.16E-02
CDC42EP5	-1.12093	0.72896	5	GTGTGCCGGAAGTCGCCGAG;GCCGAGGCGGGCAGATCACG;TCGTTCCTGAGCCGCCACGG;TCCGGCACACGCTGCACGTG;CAGGAACGAGGTGTCCCCGA	-2.86;-1.31;-0.88;-0.65;0.09	6262;20055;27707;33018;53725	5.40E-01;5.64E-01;7.24E-01;1.02E+00;7.94E-01	23717;44424;49735;57387;71172	4.50E-01;5.93E-01;4.70E-01;4.08E-01;1.83E-01
CDC42EP4	-1.022	0.829328	5	CCCGCGGCCCCATTCCGACG;GCCGAGGCGGGCAGATCACG;CGCATGCTTCAGCCCGTACG;TTCCGCCACACCATGCACGT;CTCCAAGCGCCGTTCCCGAG	-1.82;-1.31;-1.01;-0.64;-0.34	14114;20055;25099;33177;41244	3.90E-01;5.64E-01;8.08E-01;1.02E+00;1.37E+00	36198;44265;52343;57387;63327	7.26E-01;5.90E-01;4.89E-01;4.08E-01;4.37E-01
GPRC6A	0.433577	1.18302	4	GCACATAGTGCTCCTAACAG;GATCCCGAATGGCATAACCA;TCTTACCTGGAGTCAAACTG;AATTCAATCTAAATGCTCCA	-0.13;0.38;0.59;0.88	47347;61250;65536;70271	8.43E-01;7.85E-01;4.29E-01;1.69E-01	7171;11906;16192;30094	5.58E-01;9.93E-01;1.54E+00;1.64E+00
TBKBP1	-0.668578	0.59389	4	TGATCTCGTAGACTTTGAGG;ACATGTCGCCCCCAAGCGAG;CCAAACCACAGATCTGACGC;GTCGGAGCGAGACATGGCGT	-1.44;-0.54;-0.52;-0.17	18307;35655;36148;46003	3.76E-01;4.31E-01;6.64E-01;9.05E-01	31439;41294;41787;59135	4.68E-01;4.30E-01;5.39E-01;4.69E-01
ABI2	-0.418343	0.662849	4	TTACCTGGAAAGACACTGGG;TGCCTATCTGATAAACACCT;CATACTCCCCCAACAATAGG;ACGAACTGGTCGTTCAAGGT	-3.49;-0.65;-0.03;2.49	2230;32880;50068;76954	9.77E-01;4.46E-01;4.18E-01;1.10E-02	488;27374;44562;75212	1.61E+00;5.04E-01;4.90E-01;5.07E-02
ABI3	-0.836091	0.810793	5	GCGATGACCTTCTGGCCGGG;TCAGGCCACAGACAAGCGGA;CGGGCACACTCTGCGCATGT;CAAGGCAGGCAGATCACCTG;CCTGTCTCGAAAGAGCATCA	-1.4;-0.9;-0.89;-0.53;-0.45	18830;27170;27410;35879;38076	3.99E-01;4.73E-01;7.33E-01;9.08E-01;1.54E+00	39366;41563;50032;50272;58612	8.28E-01;5.43E-01;4.71E-01;5.07E-01;6.05E-01
LOC100420788	-2.46081	1.47616	3	GGCACCTCCTGTAGAGCCAC;AGAGAAGTCCCTCTCCAGTG;GAGGCCGGTGGCTCTACAGG	-3.09;-2.59;-1.69	4569;8300;15314	8.05E-01;1.51E+00;2.11E+00	62128;69150;72873	1.03E+00;5.92E-01;7.92E-02
ABI1	0.278108	0.972595	4	TCGCCACCCACTATTGGACC;GTTGTGTCGAGATATCTGCC;GAGTTACCAGAACCTGACTC;GTTTCCGAATATACCTTACA	-0.39;0.17;0.52;0.82	39660;55787;64196;69400	6.24E-01;6.14E-01;4.09E-01;1.90E-01	8042;13246;21655;37782	5.24E-01;9.19E-01;1.20E+00;1.25E+00
TESC	-1.917	1.22323	4	TCCCGTAGGAACCTGCGCAA;TCTGTTCCACATGTACGACT;TCAGCTGCTTAAATCTCCGA;TGCCAATCTTACCGAATGGT	-3.14;-2.23;-1.56;-0.74	4233;10836;16716;30878	7.33E-01;1.06E+00;1.50E+00;1.60E+00	46564;60726;66601;73213	8.17E-01;7.65E-01;4.48E-01;9.75E-02
OTP	0.0806115	0.751569	4	GCCGGGCGCACGGAACACGT;CCCCGACATCTTTATGCGTG;CACCACAGTGGGCTCTACTC;AGGCCTGCCTCAGTTCCCGT	-1.29;-0.31;-0.08;2.0	20374;41992;48737;76452	3.76E-01;4.32E-01;4.32E-01;2.23E-02	990;28705;35450;57068	1.31E+00;4.86E-01;6.82E-01;5.30E-01
PITPNC1	-0.793042	0.79564	6	GCCGAGGCGGGCAGATCACG;CCCTTTGAGGACCCTCACCA;AGCCATGAACAGAGTGACCG;CAAGGCAGGCAGATCACCTG;AGTGGAACAATTTGTACACA;ACAACAGCTCTAGCCCAACT	-1.31;-1.29;-0.99;-0.53;-0.48;-0.16	20055;20363;25396;35879;37282;46387	4.59E-01;5.14E-01;6.69E-01;7.01E-01;1.09E+00;1.34E+00	31055;40160;41563;52046;57079;57387	7.32E-01;6.64E-01;5.12E-01;4.83E-01;4.64E-01;7.81E-01
KRT39	0.126826	0.822278	4	CTGGACTTGTGCCTCTAGGT;ATGTCAATATGAGCCCATCA;ATGGGCTTGCGACAAAAGCG;GGTAATCAGGACATAGAACA	-0.6;0.1;0.25;0.76	34221;54001;57935;68420	5.12E-01;5.73E-01;3.75E-01;2.15E-01	9022;19507;23441;43221	4.93E-01;6.71E-01;1.11E+00;1.01E+00
PARG	-1.63608	1.14757	5	CAGCAAGTCTTGCGATCCTG;AAGTGAACCCGAGTCACCGA;GCCGAGGCGGGCAGATCACG;CACACAGTAACTATTCGGGT;CACTAAAGGAATCAAGACAG	-4.29;-1.78;-1.31;-0.67;-0.13	212;14505;20055;32441;47195	1.87E+00;7.25E-01;1.02E+00;1.05E+00;1.08E+00	30247;45001;57387;62939;77230	5.70E-01;6.05E-01;5.64E-01;3.89E-01;5.92E-03
ZBED5	-0.18481	0.669561	4	TCTTTGCAAAGTAATGCTAC;ATGTCTTCGAAGCTTACTAG;TGTAGACTGAAAATTTGCGA;AGTTACCATATAGCGCTGAG	-0.52;-0.22;-0.18;0.19	36190;44515;45705;56467	5.49E-01;4.46E-01;4.72E-01;5.49E-01	20975;31737;32927;41252	3.77E-01;4.55E-01;7.53E-01;1.09E+00
KRT31	0.92894	1.66643	4	CTCCTTCAATGGTAGCGAGA;GGAGCAATGGTTCACCACGC;CACCCGATTCAGGTCCACAG;TAAAATAGGACTGGTAACTG	0.01;0.44;1.14;2.13	51611;62415;72873;76642	1.00E+00;8.33E-01;7.06E-01;1.80E-02	800;4569;15027;25831	1.40E+00;1.73E+00;1.63E+00;1.91E+00
KRT32	-0.765523	0.511923	4	GGACCGCCTTAACATCGAGG;AGGAGTCATGGTGAGCACCT;CCTACAGATTCTGTGTACCA;CCTGGCCAGCTACCTGACGA	-2.98;-0.2;-0.16;0.28	5359;45305;46476;58619	6.51E-01;4.51E-01;4.61E-01;4.84E-01	18823;30966;32137;72092	3.75E-01;4.62E-01;7.77E-01;1.24E-01
KRT35	0.049211	0.736404	4	ACTCGGTTCAGGTCAACAGG;GACTGGTTGGACACCCAGGT;GTACATTGCGGACACACGAG;GTCCTACTTCCGGACCATCG	-0.88;-0.8;0.04;1.83	27812;29474;52420;76123	4.22E-01;4.77E-01;3.97E-01;2.98E-02	1319;25021;47968;49630	1.19E+00;5.42E-01;4.42E-01;7.73E-01
KRT34	-0.370146	0.547815	5	CTTGCTTCTGAAGTCGTCAG;TCTGGTGGAAATTAACCGCA;TGAAGTAGGACTGGTAGCTG;CGGACATCAACAGCATACGC;GGTGGACACTGCCCCCACTG	-1.06;-0.78;-0.42;-0.17;0.58	24033;29799;39063;46166;65309	4.55E-01;4.62E-01;5.01E-01;5.93E-01;3.70E-01	12133;31276;38379;47643;53409	4.02E-01;4.61E-01;5.09E-01;5.60E-01;8.07E-01
KRT37	0.0174104	0.774293	4	ACGCCAACAGAGTCCGTGTG;TGTCACATTCCCGGCAACAT;GTCCTACTTCCGTACAATCG;GGCTGGCACCCAACATCGAT	-0.93;-0.7;-0.54;2.24	26557;31815;35685;76757	4.10E-01;4.54E-01;6.76E-01;1.54E-02	685;41757;45627;50885	1.46E+00;4.31E-01;4.74E-01;7.30E-01
KRT36	-1.36365	0.766603	4	GGAGCCCACAGAACGGATGG;CTTCTGCTGGAAATCTTCGA;TGTACTCCGTTGCCAACTTG;GGATATGAGATGCCAGTACG	-2.42;-2.4;-0.76;0.13	9453;9650;30263;54769	4.81E-01;1.15E+00;8.37E-01;6.02E-01	22673;47179;67792;67989	3.83E-01;4.68E-01;4.76E-01;2.26E-01
IL21	-0.713002	0.624217	4	GAAAAATTATGTGAATGACT;TAGTTGGGCCTTCTGAAAGC;GTTGACGCATTCTAATCATG;CAAATACAGGAAACAATGAA	-1.1;-1.03;-0.62;-0.11	23365;24704;33760;47906	3.86E-01;5.48E-01;7.28E-01;8.34E-01	29536;43682;52738;54077	4.42E-01;4.40E-01;3.95E-01;6.24E-01
IL20	0.23884	0.926795	4	TTCTGAGATACGGGGCAGTG;TGGTAAGAAAGGAATTGGCG;TTGACATCAGAATCTTAAGG;CCGGAGAGTATAATGGTCAG	-0.77;0.19;0.64;0.89	30096;56545;66457;70323	4.49E-01;6.33E-01;4.45E-01;1.67E-01	7119;10985;20897;47346	5.60E-01;1.05E+00;1.24E+00;8.55E-01
IL22	-0.688017	0.439652	4	ATTGGGGAGAAACTGTTCCA;GTTCCAGCCTTATATGCAGG;GCGCTGCTATCTGATGAAGC;GGACTTGTCAAGCCTGCAGT	-2.78;-0.95;0.34;0.64	6892;26129;60241;66386	5.70E-01;5.23E-01;3.79E-01;2.68E-01	11056;17201;51313;70557	4.44E-01;7.47E-01;4.06E-01;1.62E-01
IL25	0.400922	1.10091	4	CCAAGAATGCAACCACCTGT;TGGCCCTACAGGACTCTGGG;CAGACTCACTCATATCTCCA;GTCTGTAGGCTGACGCAGTG	-0.49;0.11;0.98;1.0	37068;54363;71470;71660	5.67E-01;5.81E-01;6.15E-01;1.35E-01	5782;5972;23079;40374	6.26E-01;1.52E+00;1.13E+00;1.13E+00
IL24	-1.45192	0.785452	4	GGTTGTTCCCCAGAAACTGT;AGAGAAGCAGGGTAAAACCC;TTTCAAGTAGAACTCCAGCA;GGAGGTTCTGCAGAACGTCT	-2.9;-2.26;-0.77;0.12	5965;10585;30119;54643	6.16E-01;1.08E+00;8.42E-01;6.06E-01	22799;47323;66863;71477	3.83E-01;4.70E-01;4.54E-01;1.39E-01
IL27	-0.423217	0.581904	5	CATTAGGGGGACTTACAAAG;TCCTGCCTCAGCCTCCCGAG;GGCATGGAAGGGCTGAAGCG;CCAGCTTGAACCAGGAGCAA;GGAGGTGCCGCTGCAGATCG	-1.53;-0.4;-0.2;-0.06;0.08	17123;39519;45299;49075;53361	3.91E-01;5.15E-01;4.62E-01;5.30E-01;8.09E-01	24081;28367;32143;37923;60319	4.55E-01;4.67E-01;6.11E-01;8.33E-01;5.43E-01
IL26	0.193741	0.992707	4	CTCTCTATATCAAAGCAGCA;CAAGAAAATACGCTTTGTGG;TCACCAAAAGTTGTTACCCA;TTTGGTCAACTGCAATTGCA	-0.08;0.17;0.2;0.48	48695;55952;56827;63348	8.91E-01;6.18E-01;3.76E-01;3.49E-01	14094;20615;21490;28746	4.00E-01;6.40E-01;1.21E+00;1.72E+00
EPX	-0.598767	0.451214	4	GAGAGACTGACCTCCGACCG;AGTACCGCACCATCACTGGA;TGGAGACAAACTGTACAATG;CTCCAATGTGGACCCACGGG	-2.38;-0.28;-0.08;0.34	9787;42870;48722;60270	4.72E-01;4.36E-01;4.32E-01;4.35E-01	17172;28720;34572;67654	3.79E-01;4.86E-01;7.06E-01;2.35E-01
LOC105371792	0.29827	0.628065	1	AATCGTAGTAAAGCCAAGGA	0.3	59206	0.117	18235	0.628
CLINT1	0.427567	1.15561	6	CAAGGCAGGCAGATCACCTG;ACACCATCAGCAAGTTCCGG;TCCTGCCTCAGCCTCCCGAG;AAAGCATATTCATATCACAC;ACTCGCCACTGGAAGCAACA;GCAACGAACGATGATCCTTG	-0.53;-0.41;-0.4;0.23;0.99;2.69	35879;39122;39519;57518;71548;77081	9.07E-01;6.39E-01;5.06E-01;5.20E-01;5.12E-01;1.21E-02	361;5894;19924;37923;38320;41563	1.56E+00;1.20E+00;8.55E-01;6.49E-01;1.05E+00;1.62E+00
LOC105372462	-1.30793	0.586748	1	GCCGAGGCGGGCAGATCACG	-1.31	20055	0.587	57387	0.13
C4B	-1.84657	1.42487	7	TCCTATGTATCACTGGAGAG;TGCCAAGCAGTACCGGAACG;TCCCACAAGCCCCTCAACAT;CAGGCCATGGATCTCCCACG;GCTCAATAGACAGAAACCCG;AGAGTGTCCCCAACACGAGG;AGCTACGTCAGGGTTACAGG	-3.59;-3.42;-2.76;-1.53;-1.3;-0.31;-0.01	1739;2576;6986;17160;20130;42084;50501	8.63E-01;1.71E+00;1.75E+00;1.40E+00;1.86E+00;1.08E+00;1.30E+00	26941;35358;57312;60282;70454;74866;75703	7.28E-01;6.83E-01;1.19E+00;8.55E-01;9.72E-01;7.21E-01;6.90E-02
SLC22A7	-0.355684	0.559892	4	AAACATTACATAGCTGACGG;TGGTAGAGGAGAATTCTGAG;CCTGTCGGACAGATATCCAA;TCTCCCCAACACCACGTTGG	-0.93;-0.4;-0.09;0.0	26549;39465;48458;51168	4.10E-01;4.26E-01;4.36E-01;7.20E-01	26410;28984;37977;50893	4.09E-01;4.83E-01;6.19E-01;7.29E-01
AHRR	0.00678454	0.780071	6	AGGAAGGCCGAGTACTCGGT;CTGTGCGAATCGGAACTGCA;CAAGGCAGGCAGATCACCTG;CATTTATGACTACATCCACG;GCTGTCGCTGTTCTGCATTG;GTGAGTTACCGAAACCTGAG	-1.81;-0.76;-0.53;-0.15;0.58;2.72	14178;30288;35879;46622;65261;77099	3.98E-01;5.01E-01;5.12E-01;5.06E-01;3.97E-01;1.15E-02	343;12181;30820;41563;47154;63264	1.59E+00;7.28E-01;5.61E-01;5.73E-01;7.07E-01;5.27E-01
SNX31	-1.06737	0.693273	5	CACTGCTGAAAGAGTCCTAG;GAAAGAAGACAGTCAAACAA;TCTGGCAATGACCACAGCTA;CAAGGCAGGCAGATCACCTG;TAGTCTTGGAAGTTCTGAGG	-2.6;-1.31;-1.17;-0.53;0.28	8228;20026;22217;35879;58649	4.70E-01;5.65E-01;9.21E-01;9.08E-01;6.04E-01	18793;41563;55225;57416;69212	3.99E-01;5.43E-01;5.25E-01;4.08E-01;2.44E-01
SPATA31B1P	-0.232649	0.521616	3	AGGAGTCGGAAAGGAACTTG;CTGATGGCCAGAATGTCGTG;TGAGGGGCGTTCTAGGAGAA	-0.75;-0.14;0.2	30495;46821;56637	3.62E-01;3.63E-01;4.08E-01	20805;30621;46947	3.65E-01;5.47E-01;6.52E-01
LOC105371799	-1.30793	0.586748	1	GCCGAGGCGGGCAGATCACG	-1.31	20055	0.587	57387	0.13
LOC105374155	2.5733	2.2555	1	GACCGGACACTCGAAGAGCG	2.57	77012	0.00241	430	2.26
EIF4EP2	-2.32619	0.883276	1	GAAGATGAGAAAAACAAACG	-2.33	10132	0.883	67317	0.0608
EIF4EP3	-3.78887	1.85234	1	AAACTTGGCAAGCAAACCTG	-3.79	1088	1.85	76354	0.00614
ADCY6	-0.744628	0.534914	4	GATGACGCCTTCATCCGGAG;ATAGATCCCAAGCATCAGGG;AACACTGCAGTACCTGAACG;TTGGCCTGGCAACTTAACCG	-1.65;-1.15;-0.22;0.05	15730;22534;44546;52641	3.86E-01;5.93E-01;4.90E-01;6.71E-01	24801;32896;54908;61712	3.95E-01;4.46E-01;3.82E-01;3.94E-01
ADCY7	-0.474194	0.482089	5	AGAGGCACCAGAATGTCAGG;CCGTAGCCGGGTGCACATCA;CAAGGCAGGCAGATCACCTG;GCGTGGGTAGGCAGCGACAC;TGTACGTCGAGTGTCTCCTG	-1.68;-1.14;-0.53;0.21;0.78	15421;22657;35879;56888;68809	3.88E-01;5.18E-01;5.43E-01;4.13E-01;2.57E-01	8633;20554;41563;54785;62021	4.59E-01;5.54E-01;4.79E-01;4.36E-01;4.82E-01
ADCY1	0.068929	0.767659	4	CCCAGACGAAAGGACCACCA;CATGTTCAGATCCACCTCGG;CGGGGTGGTGTAGACAACGT;AACCGGGTTACGGACATGAG	-0.64;-0.33;0.57;0.68	33072;41527;65222;67079	4.93E-01;4.31E-01;4.24E-01;2.50E-01	10363;12220;35915;44370	4.59E-01;9.75E-01;6.70E-01;9.68E-01
ADCY2	-0.53671	0.52121	6	ACTCCAAGTACCGGGTCATG;GGAATCTCACTCTGTCACCC;CCTGTAATTGCATCAAGTCG;CAAGGCAGGCAGATCACCTG;TGAAGCGGCATACAAACGTG;CAGGCAGACGCTAAGCACGA	-1.82;-1.53;-0.87;-0.53;0.44;1.08	14128;17134;27937;35879;62575;72425	3.98E-01;5.69E-01;6.10E-01;7.01E-01;4.01E-01;1.75E-01	5017;14867;41563;49505;60308;63314	5.56E-01;6.28E-01;5.12E-01;4.87E-01;4.20E-01;5.25E-01
ADCY3	-1.31405	0.967431	6	CCACGGAGATGATCACGATG;AGCTGTCTCCAGTACTACAC;GCCGAGGCGGGCAGATCACG;GTCGATGAGTATCTCGACCA;CAAGGCAGGCAGATCACCTG;TCTCTTCTAGGTAATCACAG	-4.05;-1.38;-1.31;-0.61;-0.53;0.0	506;19017;20055;33804;35879;51245	1.42E+00;5.33E-01;8.50E-01;7.62E-01;1.16E+00;1.08E+00	26436;41563;43638;57387;58425;76936	5.95E-01;7.01E-01;5.26E-01;5.18E-01;4.44E-01;1.70E-02
ADCY8	-1.19649	0.804751	6	CGATATTTAAGATGGCACCC;ATTTCCAGGACAACAAACCG;GCCGAGGCGGGCAGATCACG;CAAAACACGATGTTGACATG;CAAGGCAGGCAGATCACCTG;GCTGCAGGTCATCCTCCAAG	-2.77;-2.59;-1.31;-1.1;-0.53;1.13	6948;8286;20055;23295;35879;72841	4.73E-01;9.62E-01;8.50E-01;1.22E+00;1.16E+00;1.60E-01	4601;41563;54147;57387;69156;70494	5.81E-01;7.01E-01;7.30E-01;5.18E-01;4.38E-01;2.45E-01
ADCY9	-0.403767	0.637741	9	GGAATCTCACTCTGTCACCC;TCGCCCAAGCTAGAGTGCAG;GCCGAGGCGGGCAGATCACG;CAAGGCAGGCAGATCACCTG;TCCTGCCTCAGCCTCCCGAG;GATATCGGGTCAGAGAGCCA;GGGAGACTGTTACTACTGCG;GCTACCACGTCACTGCATCG;TGTACGCCCGGCATTACGCG	-1.53;-1.41;-1.31;-0.53;-0.4;-0.34;0.38;0.44;1.06	17134;18711;20055;35879;39519;41360;61044;62429;72282	5.70E-01;5.18E-01;6.17E-01;5.87E-01;6.01E-01;7.05E-01;5.15E-01;5.07E-01;2.69E-01	5160;15013;16398;36083;37923;41563;57387;58730;60308	4.62E-01;5.24E-01;7.18E-01;5.88E-01;6.19E-01;7.00E-01;5.28E-01;6.24E-01;9.77E-01
NUCKS1	-0.0720755	0.687402	5	GCCGAGGCGGGCAGATCACG;CTTCACATACTCTCCTGGAA;TAAACAGAGAGAGATGCTCA;ATAAAAATGTGCGCCAACAA;AAGGATGATTCTCACTCAGC	-1.31;-0.7;-0.39;0.53;1.51	20055;31678;39843;64296;75149	4.08E-01;4.62E-01;4.93E-01;3.94E-01;6.52E-02	2293;13146;37599;45764;57387	8.82E-01;7.83E-01;5.19E-01;6.03E-01;6.51E-01
DDI2	-2.06428	2.04327	9	ATACTACTGAAATCTATTCG;CTTGTTGTAGATCGTCTATG;TGGATTGCGTTCCTTCAGCA;TCAATGCGATCTGAGTCACT;GGAATCTCACTCTGTCACCC;GAGATGAAATTTGAGGCCCT;TCAATCAGAAACCATAGCTG;GCTGGATTGTCCAAGCCCTG;AGAATATCTTTGTAACATAG	-4.54;-4.25;-2.91;-2.7;-1.53;-1.35;-0.77;-0.29;-0.23	79;246;5903;7453;17134;19431;29958;42502;44351	2.04E+00;3.45E+00;1.64E+00;2.19E+00;1.61E+00;2.06E+00;1.76E+00;1.48E+00;2.18E+00	33091;34940;47484;58011;60308;69978;71538;77196;77363	1.35E+00;9.59E-01;1.19E+00;1.40E+00;1.06E+00;1.39E+00;9.21E-01;1.56E+00;3.94E-03
DDI1	-0.242525	0.689386	4	CCTCAAAGATGGCGATATCG;TGATCTGGATCTCTTCGACG;ATGCCACTGAAGTCTACACG;TCACTTGTCCAAAACTCTCG	-1.55;-1.27;0.85;1.0	16856;20538;69835;71698	3.80E-01;6.42E-01;5.40E-01;1.34E-01	5744;7607;56904;60586	6.28E-01;1.33E+00;3.76E-01;4.26E-01
XRCC1	0.244342	1.09598	5	GGAATCTCACTCTGTCACCC;CCCACTCCTTACGCACGATG;TGATGGCTCAGCTTTCGTGG;ATGAGAGCGCCAACTCTCTG;CAGGCCCAAACATGCGAACG	-1.53;0.17;0.4;0.99;1.2	17134;55855;61477;71522;73440	3.91E-01;9.48E-01;6.72E-01;5.56E-01;1.15E-01	4002;5920;15965;21587;60308	6.80E-01;1.34E+00;1.26E+00;1.66E+00;5.43E-01
HOXB-AS3	-0.454369	0.58052	8	CTTCTACCGCGAGAAAGAGT;AGAGCAGAAGTGCTCCACTC;AATTTAGCAACTGATAGTCC;TCTTACGGCTACAATTACAA;GAAGCCGCTTGCCTGAAGCG;TGCGCGCAGTCCGACTTCCG;CAATTTCACCGAAATAGACG;GCTCTATTCGTCGGGCTATG	-2.21;-1.54;-0.92;-0.48;-0.08;0.31;0.52;0.76	10993;16975;26782;37408;48640;59431;64179;68531	4.10E-01;5.16E-01;5.57E-01;5.65E-01;5.50E-01;5.09E-01;4.34E-01;4.25E-01	8911;13263;18011;28802;40034;50660;60467;66449	4.08E-01;5.75E-01;7.27E-01;6.81E-01;6.33E-01;5.81E-01;5.08E-01;5.32E-01
XRCC3	-2.79563	2.18936	4	AGGAGCCGTCTACATCTGCA;GAAGCAGCATCCTTACAGGT;CAAACTGAAATCGGTAAAGG;TCAGCAAGTGCCAGACCTCG	-4.13;-3.64;-3.32;-0.09	399;1554;3098;48294	1.69E+00;2.63E+00;3.61E+00;8.20E-01	29148;74349;75889;77043	4.38E-01;2.05E+00;1.12E+00;8.95E-03
XRCC2	-0.117445	0.730354	4	TACTGGATAGACCGCGTCAA;GCTCAAGAATTGTAACTAGC;AGGAACTTCTACCTTCAAGT;TGTATACTTCCCAAATCAGA	-0.59;-0.0;0.04;0.08	34326;50797;52499;53542	5.14E-01;5.15E-01;3.96E-01;6.41E-01	23900;24943;26645;43116	3.89E-01;5.44E-01;9.71E-01;1.02E+00
XRCC5	-2.38684	1.77635	5	TACCTGTCGCTGTACAAACA;AGTAAGAAATATGCTCCCAC;ATCCAAAGCATGAATCAGGG;GAACTATATCACTTCCATAG;TCCTGCCTCAGCCTCCCGAG	-3.56;-2.78;-2.73;-2.47;-0.4	1893;6908;7269;9097;39519	9.56E-01;1.22E+00;2.17E+00;3.08E+00;1.46E+00	37923;68350;70172;70543;75549	7.80E-01;1.90E+00;1.18E+00;5.13E-01;5.37E-02
XRCC4	-0.750494	0.636913	5	ATGGTCATTCAGCATGGACT;TGGAGACTGATCTTTATAAG;CAAGGCAGGCAGATCACCTG;ATTGGAATGATGTTCAAGGA;TTAAACGTGTATACATCAGC	-1.66;-1.11;-0.53;-0.44;-0.01	15673;23205;35879;38505;50471	3.88E-01;5.11E-01;5.43E-01;8.13E-01;9.30E-01	26971;38937;41563;54237;61769	5.03E-01;5.08E-01;4.79E-01;4.43E-01;4.91E-01
XRCC6	-1.44558	0.929444	4	TGAGACCTCTTGGTATCGCT;CTCCTCTGGGTACACGAACA;TTCCAAGACATGATGGGCCA;GGTGATCTCCGAGATACAGG	-3.23;-1.02;-0.95;-0.58	3651;24855;26147;34718	7.87E-01;5.45E-01;9.92E-01;1.39E+00	42724;51295;52587;73797	7.02E-01;5.23E-01;3.96E-01;8.37E-02
MEIS3	-0.242483	0.620347	5	TATGTGGATTCGAGACCATG;AGACAGTGCCCGCAGTACCA;CAAGGCAGGCAGATCACCTG;CCTCCCAGGTTCGCTCTGAG;GAGCAGACGTCACCTCCAGG	-1.66;-0.64;-0.53;0.72;0.91	15656;33041;35879;67784;70542	3.88E-01;4.65E-01;5.43E-01;4.37E-01;2.03E-01	6900;9658;41563;44401;61786	5.13E-01;9.82E-01;4.79E-01;6.37E-01;4.90E-01
MEIS2	-2.14689	1.40736	4	CCTTCAAACAGCTAATGTAT;ACGGAGACCCTCACGCGCCG;GACAACAGTGTAGCTTCACC;GGGTTGAGGTTGCATCATCG	-3.48;-3.31;-1.2;-0.6	2263;3160;21760;34065	9.71E-01;2.04E+00;1.20E+00;1.43E+00	43377;55682;74274;75174	7.20E-01;6.11E-01;8.41E-01;5.16E-02
MEIS1	-0.146994	0.80342	4	GGGTACTGATGCGAGTGCAG;ATGCGGGTCCCCATACATCG;GGTGGCCACACGTCACACAG;ATCATGATCTCTGTTCCAAG	-2.59;-0.74;0.85;1.9	8310;30682;69775;76270	5.15E-01;4.64E-01;5.38E-01;2.65E-02	1172;7667;46760;69123	1.24E+00;1.32E+00;4.57E-01;1.97E-01
PCDHAC2	-0.784408	0.624206	5	CTTTGGAAACTCCTATACAC;CATGTCCACCACATATACGT;CAAGGCAGGCAGATCACCTG;TTATCGCGTCCAGCTACGGG;CTTTCACATAGAGAGTGCGC	-1.72;-1.3;-0.53;-0.45;0.08	15076;20109;35879;38138;53543	3.88E-01;5.63E-01;5.43E-01;8.26E-01;8.01E-01	23899;39304;41563;57333;62366	4.53E-01;5.12E-01;4.79E-01;4.09E-01;4.70E-01
PCDHAC1	-0.445109	0.626253	9	CTTTGGAAACTCCTATACAC;CATGTCCACCACATATACGT;CTGGTGCTTACAGCTCGGGA;CAAGGCAGGCAGATCACCTG;TTATCGCGTCCAGCTACGGG;TGACCCTACCATTAGAATCG;CTTTCACATAGAGAGTGCGC;GGCAGTGGAATCATCCAGTG;AAGGAAGCGAAAGTTCCGCG	-1.72;-1.3;-0.86;-0.53;-0.45;-0.19;0.08;0.36;0.6	15076;20109;28241;35879;38138;45523;53543;60716;65716	5.09E-01;5.29E-01;5.72E-01;5.87E-01;6.16E-01;6.15E-01;5.87E-01;5.57E-01;6.42E-01	11726;16726;23899;31919;39304;41563;49201;57333;62366	4.36E-01;5.15E-01;5.69E-01;5.93E-01;6.03E-01;7.00E-01;6.99E-01;6.76E-01;8.46E-01
CTLA4	-0.784658	0.513423	4	CCTCACTATCCAAGGACTGA;GCAGATGGAATCATCTAGGA;TTCCATGCTAGCAATGCACG;TACCCACCGCCATACTACCT	-1.98;-1.15;-0.15;0.15	12677;22489;46589;55351	4.17E-01;5.94E-01;4.60E-01;5.83E-01	22091;30853;54953;64765	3.80E-01;4.63E-01;3.82E-01;3.11E-01
ESPNL	0.619499	1.1373	4	GCACTGGTGATGATCCTCGG;CCGTGCCGTGAGTCCGATGT;GCAGACCGCAGCCCCCCTCG;TGGCGGAGTACCATGGACAC	-0.45;-0.03;0.06;2.89	38257;50152;52872;77178	5.92E-01;5.05E-01;3.94E-01;5.91E-03	264;24570;27290;39185	1.87E+00;5.50E-01;9.46E-01;1.18E+00
HLA-DPA1	-0.451719	0.494492	4	CGTCACGTGGCTGTGCAACG;GCAAAGATAGGGCGTACCGT;TCTATGCGTCTGTACAAACG;GTGGGAAGAACTTGTCAATG	-0.96;-0.77;-0.49;0.41	26072;30178;36938;61797	4.06E-01;4.69E-01;6.44E-01;3.92E-01	15645;40504;47264;51370	3.87E-01;4.28E-01;4.51E-01;7.13E-01
RSL1D1	-1.7172	1.14549	4	AAATGTCTCCCAATGAGTGA;TGATCGAATACTATGAGGCA;ATCCCAATTGCTGACAAACG;GCTATACGTATTGGTCACGT	-4.46;-1.71;-0.91;0.21	105;15146;27043;57046	2.27E+00;8.28E-01;9.55E-01;5.31E-01	20396;50399;62296;77337	3.76E-01;5.09E-01;3.90E-01;2.33E-03
PCDHACT	-0.533336	0.334131	1	CAAGGCAGGCAGATCACCTG	-0.53	35879	0.334	41563	0.27
DDX60	0.465374	1.17364	5	CAAGGCAGGCAGATCACCTG;GCTGAAGGAGAGCGACGACG;TCAACCACAAAAGATGACGT;CTGTTGTTAGTGCAGCACAT;TGTTGTTCGAACATCAATGG	-0.53;0.12;0.13;0.41;2.19	35879;54695;54839;61854;76719	7.16E-01;8.98E-01;5.19E-01;3.88E-01;2.03E-02	723;15588;22603;22747;41563	1.35E+00;6.85E-01;9.04E-01;1.58E+00;1.35E+00
LOC107985840	-1.30793	0.586748	1	GCCGAGGCGGGCAGATCACG	-1.31	20055	0.587	57387	0.13
H2AFY2	-0.151846	0.715657	5	GCCGAGGCGGGCAGATCACG;TTACCGACAGTCCAAACCAA;TATTGGCTCCATGAGAGTGG;GACTGCCGCCATGTAGACAG;AGCCCCGAGACACATCTTGC	-1.31;-0.93;0.38;0.54;0.56	20055;26532;61114;64654;64989	4.08E-01;4.77E-01;6.61E-01;3.97E-01;3.81E-01	12453;12788;16328;50910;57387	3.99E-01;7.99E-01;1.23E+00;4.95E-01;6.51E-01
ADCY10	-0.427436	0.462627	4	GCACAGGGAATGTTAACGAA;TCACAAACACAATCGTCACT;AGAAAACAGCCTACGAGCTG;AATGCTTACCTATCTTGACT	-1.26;-0.85;-0.12;0.52	20721;28381;47558;64144	3.76E-01;4.90E-01;4.47E-01;3.27E-01	13298;29884;49061;56721	4.09E-01;4.72E-01;4.29E-01;5.41E-01
OPN1MW	0.0189021	1.26536	10	GCACGAAGTAGCCATAGACC;CAGAGCACGATGATGCTGAG;TACCTGCTCCAACCAAAGAT;CACGGCCTGAAGACTTCATG;GAGCACGATGATGCTGAGTG;TGCGGCCCAGACGTGTTCAG;GTTCACAACGCTGATAGTGC;ACCAACAGCAACTCCACCAG;GGTAATTCGGGCCTTCGAAG;CAGCGGCAGCTCGTACCCCG	-3.4;-1.83;-1.7;-0.2;0.0;0.57;0.64;1.41;1.45;3.23	2687;13994;15287;45342;51333;65244;66417;74680;74887;77280	5.98E-01;5.25E-01;7.03E-01;9.03E-01;8.52E-01;1.34E+00;9.28E-01;1.37E+00;6.13E-01;9.04E-03	162;2555;2762;11025;12198;26109;32100;62155;63448;74763	1.69E+00;1.43E+00;2.37E+00;1.46E+00;1.98E+00;1.23E+00;1.30E+00;5.20E-01;5.22E-01;1.53E-01
KCNA7	-0.641256	0.52675	4	GGATAGCCACAAAATCGATG;TCTACTACTACCAGTCCGGT;CATCCTGAGAGTCATCCGAT;TGGAGCCATTCAGCGGAGCG	-1.38;-0.78;-0.64;0.24	19015;29856;33133;57646	3.75E-01;4.73E-01;7.47E-01;5.13E-01	19796;44309;47586;58427	3.75E-01;4.44E-01;4.46E-01;4.89E-01
KCNA4	-1.53269	0.897875	4	AGCTCTCTGGATATTCAAAG;GGACGACAGGGATCTCGTCA;GGCATCAGGTCAGAGCAATG;CCACCACCACCAGTCACGCG	-3.13;-1.86;-0.79;-0.36	4308;13758;29650;40799	7.27E-01;8.93E-01;8.58E-01;1.11E+00	36643;47792;63684;73134	5.58E-01;4.75E-01;4.03E-01;9.94E-02
KCNA5	-0.987097	0.698208	4	GCAGCCCGGAGATGTTGATG;CGGAGAGCTCTGGGTCCGCG;GGTGAACCAGATGACGCACG;AGATACGCTTCTACCAGCTG	-1.55;-1.44;-1.09;0.13	16836;18310;23554;54891	3.80E-01;7.09E-01;1.11E+00;5.98E-01	22551;53888;59132;60606	3.82E-01;5.71E-01;3.76E-01;4.26E-01
KCNA2	-0.323648	0.543517	4	TATAGCTATTGTGTCTGTCA;AGATGAAGGCTACATCAAGG;GATGAGAATGAAGACATGCA;AAATGGCATCAAAGCTAGGG	-1.77;-0.88;0.37;0.98	14584;27673;61018;71461	3.95E-01;5.00E-01;3.82E-01;1.40E-01	5981;16424;49769;62858	6.15E-01;7.76E-01;4.21E-01;3.62E-01
KCNA3	-0.0717319	0.664619	4	CATGAACCTGATCGACATTG;GAGAAGTTCCGCGAGGACGA;TGGGCACGTTGACCGGCCGG;GCTGGTGAACCACGGCTACG	-0.99;-0.09;0.26;0.54	25340;48272;58254;64535	3.99E-01;4.80E-01;3.75E-01;3.17E-01	12907;19188;29170;52102	4.14E-01;6.81E-01;8.75E-01;6.88E-01
MFSD4A	-1.05413	0.883918	4	AGGCCAGCACCTTCACGTCG;TGCCAAAGGAAGAACCTCAG;CACAGCATAGCTGTACACGA;GCTGGTAAGGATGTACCAGA	-1.58;-0.95;-0.86;-0.83	16518;26305;28221;28707	3.82E-01;5.20E-01;9.10E-01;1.72E+00	48735;49221;51137;60924	8.92E-01;4.92E-01;4.08E-01;4.17E-01
LOC101928525	1.37419	1.83083	2	CACACTCGCTACTTCAGGGG;GGACCACGACATCATCGACC	0.99;1.76	71549;75956	8.52E-01;1.68E-02	1486;5893	1.42E+00;2.24E+00
OPTN	-0.74536	0.604628	6	TGTGTGGAGATGGCGACTAG;GCCGAGGCGGGCAGATCACG;AAGAAATCAAGCATAGTCCT;CAAAAAGTTAGAGCTACAAG;AAACCTGGACACGTTTACCC;AGATTGAAACCCAGACAGAG	-1.98;-1.31;-0.8;-0.54;-0.32;0.47	12714;20055;29364;35820;41818;63177	3.96E-01;5.18E-01;5.84E-01;7.03E-01;8.97E-01;5.30E-01	14265;35624;41622;48078;57387;64728	3.99E-01;5.69E-01;5.12E-01;4.94E-01;4.59E-01;4.67E-01
BHMT	-1.12452	0.66367	4	AAGAGGGGCTACGTAAAGGC;TGACGTTTGAGCCAGCTCTG;GATAGCATCCGGTAAACCTG;TCAGGAGTGTGGTAAGCCAA	-3.37;-0.65;-0.57;0.09	2856;32896;35067;53678	8.80E-01;4.46E-01;6.92E-01;6.37E-01	23764;42375;44546;74582	3.89E-01;4.34E-01;4.90E-01;6.53E-02
TESC-AS1	-1.52854	0.655112	1	GGAATCTCACTCTGTCACCC	-1.53	17134	0.655	60308	0.109
OPTC	-0.169151	0.587653	4	GAAGGCATCATTATCGATGG;TTCAGGACATCATTCCGCAG;TAGTAGGTCTGGTCATCGTG;TACAGGTAGGCAGTCCTCCG	-0.78;-0.5;-0.05;0.65	29831;36731;49513;66667	4.46E-01;4.28E-01;4.24E-01;2.60E-01	10775;27929;40711;47611	4.50E-01;4.96E-01;5.60E-01;8.45E-01
MCCC2	-0.722877	0.490075	4	GTAGGCACCTCCTTTGACGG;TTGACAATCTCATAGACCCA;ACTTAACTAGGAAGGTTGTG;TTAGGTCATTGCTAGAATCG	-2.2;-0.74;-0.05;0.1	11058;30748;49551;53900	4.44E-01;4.64E-01;4.23E-01;6.30E-01	23542;27891;46694;66384	3.87E-01;4.97E-01;4.58E-01;2.68E-01
NO_CURRENT_156	-0.446491	0.514839	4	GCGTTCCCCCACTGACGGGG;GCTAAGGTCATGTTTGCAAT;GCGGTTCCGGGAGCACATTT;GCGTGCGTCCCGGGTTACCC	-1.16;-0.5;-0.09;-0.04	22456;36737;48460;49669	3.82E-01;4.28E-01;4.36E-01;7.72E-01	27773;28982;40705;54986	4.22E-01;4.83E-01;5.60E-01;5.95E-01
NO_CURRENT_157	0.0329946	0.767248	4	GCTAGTGTCGTGGGGGATGA;GCTAGTTTCTGTTAGCTCCT;GCTCCCATCCATAGTAAAAA;GCTCGCAAGTATTTAAGGAC	-1.15;0.21;0.29;0.79	22463;56880;59105;68860	3.82E-01;6.42E-01;3.76E-01;2.04E-01	8582;18337;20562;54979	5.06E-01;7.08E-01;1.26E+00;5.95E-01
NO_CURRENT_154	-0.287713	0.617616	4	GCGAACCCCGTAGCCAGGCT;GCGATCGGAGTGCCACGATA;GCGGAATGAACACGAGGTAG;GCGAATGCCTGAAAGTATAA	-0.51;-0.51;-0.42;0.28	36602;36636;39038;58719	5.57E-01;4.28E-01;5.95E-01;4.81E-01	18723;38404;40806;40840	3.75E-01;4.26E-01;5.58E-01;1.11E+00
NO_CURRENT_155	0.143112	0.879213	4	GCGGGCAGAACGACCCTGAC;GCGGGGCGGTGACTTTCAAG;GCGGCGTCTGGGAATCGTTC;GCGGCGTCATCCACGCGTGC	-0.66;0.26;0.4;0.56	32720;58246;61701;65051	4.87E-01;6.81E-01;3.86E-01;3.03E-01	12391;15741;19196;44722	4.21E-01;8.03E-01;1.34E+00;9.54E-01
NO_CURRENT_152	0.694487	1.29286	4	GCCGTGTTGCTGGATACGCC;GCCCTTCAATGCGTTCCGTA;GCCGTGGTATCAAGTCGGTA;GCCGCCGATTTCATAAGTAA	-0.2;-0.0;0.78;2.2	45341;50814;68771;76724	7.78E-01;5.15E-01;5.04E-01;1.62E-02	718;8671;26628;32101	1.44E+00;1.23E+00;9.72E-01;1.53E+00
MCCC1	-0.604667	0.609968	6	GCCGAGGCGGGCAGATCACG;AGAAGTTTGTAGACACACCG;CGACCAGCTTCGCAATCATG;CAAGGCAGGCAGATCACCTG;AAGGTCCTCATTGCAAACAG;GTCATGATTAAAGCCGTCCG	-1.31;-1.16;-0.92;-0.53;-0.42;0.71	20055;22438;26933;35879;38852;67677	4.59E-01;4.94E-01;6.32E-01;7.01E-01;1.02E+00;3.51E-01	9765;38590;41563;50509;55004;57387	4.14E-01;6.27E-01;5.12E-01;4.84E-01;5.03E-01;7.81E-01
NO_CURRENT_150	0.125991	0.781632	4	GCCAGGGTATGGGCATCTCG;GCCATTCTAGTCCCGGCATA;GCCAGGGTTCTTGGTCCCGA;GCCCAGACGCCCTAGAATAG	-1.02;-0.52;0.55;1.49	24906;36238;64862;75045	3.96E-01;4.30E-01;4.18E-01;5.46E-02	2397;12580;41204;52536	9.48E-01;9.54E-01;5.50E-01;6.74E-01
NO_CURRENT_151	-0.339988	0.503302	4	GCCCCAAGCTAGAACTCAGC;GCCCCGTAAATCTCATTACA;GCCCCGCCGCCCTCCCCTCC;GCCCCTTATGATTGTTATAG	-1.35;-0.76;0.21;0.54	19439;30250;57031;64550	3.75E-01;4.69E-01;3.76E-01;3.16E-01	12892;20411;47192;58003	4.14E-01;6.46E-01;4.52E-01;5.02E-01
NO_CURRENT_158	-0.21185	0.582811	4	GCTGGAGAGACAATTCTACT;GCTGAACGCCGACAGGACGG;GCTGCGGCGAGATCACATAA;GCTGATATATACGACAAGCC	-0.81;-0.69;0.2;0.45	29294;32052;56649;62649	4.39E-01;4.52E-01;3.76E-01;3.68E-01	14793;20793;45390;48148	3.93E-01;6.36E-01;4.77E-01;8.26E-01
NO_CURRENT_159	0.169604	0.793933	4	GCTTAACCTATCCGCCAGTA;GCTGTTGTAACGGTAGATAT;GCTGTTCCGAAGTTGAGAAT;GCTTAAGTCACGGCTTTCCA	-0.96;-0.44;0.09;1.99	25934;38424;53723;76444	4.04E-01;4.26E-01;3.88E-01;2.25E-02	998;23719;39018;51508	1.30E+00;5.67E-01;5.95E-01;7.08E-01
ACACA	-1.09903	1.0535	10	AATGCATGCGGTCTATCCGT;TATTTGCCTAGGTACCGAAG;ACTGCAGGGTAGCTATAGTC;TGATGGGTCCATGATAACCG;CAAGGCAGGCAGATCACCTG;TCCTGCCTCAGCCTCCCGAG;GGGGATTAGGTGACAGCTTG;CCAGAGTCCCACATTCCCTG;GTCGGCAACTGCTATCTCTG;ATTCCCAGGAGTTATAGAAG	-4.85;-3.75;-2.6;-2.29;-0.53;-0.4;-0.07;0.55;1.41;1.53	19;1171;8260;10434;35879;39519;49052;64763;74701;75219	2.61E+00;2.04E+00;1.18E+00;1.54E+00;6.21E-01;6.71E-01;6.16E-01;5.40E-01;5.92E-01;1.26E-01	2223;2741;12679;28390;37923;41563;67009;69197;76268;77423	6.56E-01;1.37E+00;8.22E-01;6.11E-01;6.10E-01;6.36E-01;9.73E-01;6.83E-01;8.79E-01;1.01E-03
ACACB	-0.261438	0.598698	5	AAAGCGTGTGACAAACTCAG;GAACTCGAATATGGCCAGCG;CAAGGCAGGCAGATCACCTG;GTCGGAGTCCATAATCCACA;ACAACGACATCGACACCGGG	-1.06;-0.91;-0.53;0.52;0.68	24159;27074;35879;64085;67111	4.56E-01;4.73E-01;5.43E-01;3.93E-01;3.11E-01	10331;13357;41563;50368;53283	4.25E-01;7.73E-01;4.79E-01;5.05E-01;8.12E-01
TNK1	-0.116207	1.1419	4	TGGGCCTAAGTCTAAGAACT;AATGGTCGCACCTTCAAAGT;CCCAAACATCCACACGTCCG;CCTCTGGGATCAGACACTTG	-3.37;0.73;1.05;1.14	2819;67930;72117;72883	8.85E-01;1.16E+00;6.53E-01;1.05E-01	4559;5325;9512;74623	7.07E-01;1.61E+00;2.19E+00;6.44E-02
PLA2G2A	-0.658775	0.452196	4	TACAAACGTCTGGAGAAACG;GTAGAAGCCATAACTGAGTG;AAGGATGCAACGGATCGGTG;GCTACAAGTTTAGCAACTCG	-2.72;-0.47;0.24;0.31	7326;37629;57633;59574	5.52E-01;4.27E-01;3.75E-01;4.56E-01	17868;19809;39813;70119	3.77E-01;6.63E-01;5.78E-01;1.73E-01
PLA2G2C	0.0963191	0.842335	4	ACGGATATGGCTGCTACTGT;CCACTGCGCCATTGACGATG;AACTGGTAGCTGTTCAACAC;TGGGGATAAAGGGATCCCCG	-2.07;-0.03;0.25;2.23	12054;50078;58031;76750	4.26E-01;5.04E-01;3.75E-01;1.56E-02	692;19412;27364;65388	1.46E+00;6.74E-01;9.43E-01;2.94E-01
PLA2G2E	-0.540102	0.506496	4	GTGGACCAGACTGACTGGTG;TATGGCTGTTACTGCGGCAT;ACAAAGATCACTTACCCAGG;ATAGTCGTTGTACTGCAGGG	-1.22;-0.63;-0.44;0.13	21291;33380;38573;54812	3.78E-01;4.43E-01;6.05E-01;6.00E-01	22630;38869;44062;56151	3.83E-01;4.26E-01;4.98E-01;5.58E-01
PLA2G2D	0.210617	0.877574	4	AGAAAGGAGTTACCAGTCCG;GGTGTGATTCCAATCCAGGG;AGTCCGCAGTGACAGCCGTA;ACAGCAGTGGATGTTCCCCT	-0.65;0.06;0.51;0.93	32843;52997;63942;70794	4.89E-01;5.53E-01;4.06E-01;1.56E-01	6648;13500;24445;44599	5.81E-01;9.06E-01;1.07E+00;9.59E-01
PLA2G2F	0.165284	0.827555	4	GACAGGAGGCCCCGAAGCGT;TCATACCCAGGCTAGACCTG;TCTCGATGGTGTGATCATAG;GTAGCAACCGTAGCCCACGA	-0.4;-0.36;0.0;1.42	39562;40649;50878;74732	6.21E-01;4.28E-01;4.10E-01;6.19E-02	2710;26310;36793;37880	9.00E-01;5.20E-01;6.47E-01;1.24E+00
OR8J3	0.392553	1.05533	4	TGTATCGGAGGTAATGATGC;TAACCCTCTGCTCTACATGG;AGTGCTCTATGTGCTGACCA;TAAGACACAGAGAATATACA	-0.9;-0.08;1.06;1.49	27200;48604;72267;75058	4.16E-01;4.84E-01;6.63E-01;5.43E-02	2384;5175;28838;50242	9.50E-01;1.63E+00;8.87E-01;7.52E-01
OR8J1	-1.8509	1.11307	4	TGTATCGGAGGTAATCATGC;TCTATGGGCTGACCATGGCA;TAACCCTCTGCTGTACATGG;TATATCTGCAGCAACAAATG	-3.83;-3.15;-1.01;0.59	986;4149;24993;65531	1.31E+00;1.81E+00;1.04E+00;2.90E-01	11911;52449;73298;76456	4.29E-01;5.43E-01;7.41E-01;2.22E-02
AATK-AS1	-0.533336	0.334131	1	CAAGGCAGGCAGATCACCTG	-0.53	35879	0.334	41563	0.27
CYFIP1	-0.747777	0.728855	6	CACCGACAAGTACTCCAACA;AGGGCATCGACATCTCAATG;GGAATCTCACTCTGTCACCC;AATCTACGAGAAAACCGTGG;CAAGGCAGGCAGATCACCTG;GCAGATGATCCAGATCCGCG	-1.96;-1.77;-1.53;-1.05;-0.53;2.36	12840;14604;17134;24224;35879;76858	3.96E-01;6.36E-01;9.90E-01;1.17E+00;1.16E+00;1.97E-02	584;41563;53218;60308;62838;64602	1.36E+00;7.01E-01;7.02E-01;5.69E-01;4.00E-01;4.72E-01
CYFIP2	-0.489101	0.646868	9	TGAGCCGCGATGGTCTTACA;ACCACGGAGCTGATCGTTCG;GATTTGATATCAAGGTGCCC;CAAGGCAGGCAGATCACCTG;AGACAAACTGATCAAAACAC;ACTGGTGTAATTGTAGCGTG;AGCACCCAAAGGGAGATCTG;TCTTCTCATAGATCTCTACT;AGCCAGCGGACTCTTATCCA	-1.75;-1.1;-0.84;-0.53;-0.48;-0.37;-0.15;0.26;0.54	14818;23438;28662;35879;37285;40359;46683;58308;64658	5.02E-01;5.78E-01;5.75E-01;5.87E-01;6.28E-01;7.33E-01;7.84E-01;6.39E-01;7.05E-01	12784;19134;30759;37083;40157;41563;48780;54004;62626	4.55E-01;5.21E-01;5.98E-01;5.94E-01;5.95E-01;7.00E-01;7.12E-01;8.17E-01;8.30E-01
GUSBP4	-1.52854	0.655112	1	GGAATCTCACTCTGTCACCC	-1.53	17134	0.655	60308	0.109
GUSBP1	-0.533336	0.334131	1	CAAGGCAGGCAGATCACCTG	-0.53	35879	0.334	41563	0.27
LOC107984089	-1.30793	0.586748	1	GCCGAGGCGGGCAGATCACG	-1.31	20055	0.587	57387	0.13
KRTAP29-1	-0.714188	0.507218	4	ACAACAAGTAGATTCCGAGC;ACCACATACCCAGTTAAAGG;AGCAGGATCACAGCCACTTG;AGTTCATGTCAACCCGTCAG	-1.8;-1.35;0.14;0.16	14246;19388;55101;55634	3.98E-01;6.75E-01;3.81E-01;5.75E-01	21808;22341;58054;63196	3.79E-01;5.97E-01;3.75E-01;3.53E-01
LHPP	-0.215255	0.679934	7	TACCTCAAGCGCCTTCATGT;TGTGTGGTAATTGCAGACGC;CAAGGCAGGCAGATCACCTG;TCCTGCCTCAGCCTCCCGAG;TCAGCACTTCTGGGCTCAGA;GTCTCCTTGTAGTAACGCCT;TCGGGCGTGCTGTACGACAG	-1.41;-0.61;-0.53;-0.4;-0.04;0.39;1.1	18716;33869;35879;39519;49627;61361;72547	4.93E-01;6.45E-01;5.39E-01;5.55E-01;5.33E-01;4.44E-01;1.98E-01	4895;16081;27815;37923;41563;43573;58726	5.24E-01;5.49E-01;5.63E-01;5.73E-01;6.97E-01;1.01E+00;8.41E-01
NUP188	-0.27542	0.599864	5	GGTTCAGAAACAGTTCGATG;TACCTGCAAGAGGACTACAG;CAAGGCAGGCAGATCACCTG;TCATGGGAGATCACATCATG;TTCAGCACAAACATTACACA	-1.44;-0.81;-0.53;0.69;0.72	18244;29103;35879;67405;67787	3.96E-01;4.64E-01;5.43E-01;4.30E-01;2.89E-01	9655;10037;41563;48339;59198	4.37E-01;9.56E-01;4.79E-01;5.45E-01;5.83E-01
GLT8D2	-0.560186	0.662472	10	GATCGCTCTCTTCTGCACTG;AGATGTGGCTGCCAGTGGTG;TGATCAGATGTGGCTGCCAG;CGACGCCGACCTGAGCCCGG;TCCTGCCTCAGCCTCCCGAG;CATCTGAGAAAGCCGCCGCG;TCAGGACATAAACAGACTCG;TCTTATACAGAATCACACAG;AGGGTAGCTGATCTTCTGTG;CACTACATAGAACAAGATGT	-1.74;-1.51;-1.28;-1.17;-0.4;-0.39;-0.14;-0.09;-0.07;1.19	14898;17296;20498;22164;39519;39707;46951;48279;49017;73338	5.51E-01;5.27E-01;5.87E-01;7.30E-01;6.10E-01;6.67E-01;6.57E-01;8.37E-01;1.22E+00;2.36E-01	4104;28425;29163;30491;37735;37923;55278;56944;60146;62544	4.89E-01;8.06E-01;6.30E-01;6.01E-01;6.10E-01;7.07E-01;5.76E-01;5.70E-01;6.39E-01;9.28E-01
GLT8D1	0.118575	0.794717	4	TCTACTAAAGTTGTCATCCG;TGGCAAGTAGAACCTTGCAA;TGCAGTAGATGGGAGACAAG;AGGATTAAATGAGCAAGTGC	-0.41;-0.29;0.26;0.91	39137;42753;58322;70563	6.12E-01;4.35E-01;3.75E-01;1.62E-01	6879;19120;34689;38305	5.71E-01;6.83E-01;7.02E-01;1.22E+00
OR2C3	0.408329	1.10447	4	CAAGCCAGTTGCATAATGAG;GAAGAGGACAGTTTCTAGTG;AGAAAACCATAAGCTATGGA;GAGCTGTGGGACAATGCTCG	-0.35;0.4;0.44;1.14	40975;61493;62606;72931	6.56E-01;7.95E-01;3.93E-01;1.04E-01	4511;14836;15949;36467	7.11E-01;8.42E-01;1.56E+00;1.31E+00
OR2C1	0.159586	0.871587	4	AGCGAAAGCAAGGTCCAAGG;CAAATGCTGATCAATTTATG;GGTGGAGGGATTCCTCTGCG;TGGCGACACAAGTCTCAACC	-1.33;0.24;0.49;1.24	19669;57704;63680;73699	3.75E-01;6.65E-01;4.03E-01;8.60E-02	3743;13762;19738;57773	7.78E-01;8.92E-01;1.31E+00;5.09E-01
REG1A	-0.437827	0.561755	4	CTGAGACAGAAACATCAGGC;GAACATGAATTCGGGCAACC;TAATGAAGACCGTGAGACCT;CTTAATCAGTGAGGCCACAA	-2.62;-0.07;0.3;0.65	8053;48912;59188;66528	5.24E-01;4.88E-01;3.76E-01;2.64E-01	10914;18254;28530;69374	4.47E-01;7.11E-01;8.99E-01;1.91E-01
REG1B	-0.254287	0.647465	4	GAACATGAATTCAGGCAACC;CTTAATCAGTGAGGCCACGA;CCTTCTGGGCAGCTGATTCG;CAGAGACAGGAACATCAGGG	-0.49;-0.39;-0.24;0.1	37063;39839;44210;53919	5.66E-01;4.27E-01;4.96E-01;6.29E-01	23523;33232;37603;40379	3.87E-01;4.44E-01;6.28E-01;1.13E+00
LOC107984332	-1.02065	0.648823	2	CAGGTTGGTACGATTCAAGG;CCAGGACTGAGCCTTAGGCA	-1.12;-0.92	22999;26902	3.79E-01;9.18E-01	50540;54443	3.44E-01;3.06E-01
MRGPRD	1.52933	1.8985	4	TCAGCCCTAAACTATTCCAG;GATGTACTTTGCCTACACAG;GGTGACACTTGAACCAGATA;TGAAGATCGGTGCTTCAGGG	-0.27;0.53;0.95;4.9	43271;64302;71149;77418	7.17E-01;9.24E-01;5.99E-01;5.16E-04	24;6293;13140;34171	2.91E+00;1.48E+00;1.79E+00;1.42E+00
MRGPRE	-0.718903	0.519144	4	GGTGAGGGCGCACACACAGG;CATTCCCCAGCAGCCCACCG;AAGGAAGATGAGATCCGCGC;GCCACTTGTGCCGGACGCTG	-2.91;-0.13;0.01;0.15	5874;47271;51629;55359	6.21E-01;4.69E-01;4.03E-01;5.83E-01	22083;25813;30171;71575	3.80E-01;5.28E-01;8.40E-01;1.37E-01
OSR2	-0.509939	0.577911	4	CTTAGGCGGATCCTCTTGCG;AGGGGAAGCGCGCGTCCACG;TGTCCGGAGTCAATTTACTG;GGGCCTGTACGGTCTCAGCG	-3.2;-0.6;0.55;1.21	3820;34205;64790;73522	7.71E-01;4.38E-01;4.17E-01;9.02E-02	3920;12652;43237;73626	7.61E-01;9.50E-01;5.12E-01;8.78E-02
MRGPRG	-0.761493	0.470529	4	CGTTACCTACCGGTCCCCCG;AGAAGGGGCCCTTCTTGATG;GCCAGCCGTCCAGGCGACGC;CCCCACCGCGAACCACAGGA	-2.8;-0.96;0.32;0.39	6749;25948;59758;61423	5.76E-01;5.26E-01;3.77E-01;4.03E-01	16019;17684;51494;70700	3.84E-01;7.30E-01;4.04E-01;1.58E-01
TTC39B	-0.79188	0.615428	4	TATCACATGATGCAAAGTGA;TGCCACCCAAAAACCAAGCA;ACGTGAGTGCAGCTTTCTGT;CTTGGGCTACAGTACCATTG	-1.4;-1.28;-1.22;0.74	18801;20386;21353;68089	3.75E-01;6.46E-01;1.22E+00;2.24E-01	9353;56089;57056;58641	4.84E-01;6.21E-01;3.76E-01;4.83E-01
TTC39A	-1.02279	0.911353	7	TGTACACCTACCGAGCACGA;GGAATCTCACTCTGTCACCC;CTGCATAGCAGACCTCAGCG;AGTATTGTGAGGACTGAACA;CAAGGCAGGCAGATCACCTG;GCACTCCTCGAAACGCCGGA;TCCTGCCTCAGCCTCCCGAG	-2.77;-1.53;-0.87;-0.64;-0.53;-0.42;-0.4	6954;17134;27874;33237;35879;38952;39519	4.47E-01;5.31E-01;5.62E-01;6.56E-01;8.89E-01;1.25E+00;2.05E+00	37923;38490;41563;44205;49568;60308;70481	1.22E+00;7.77E-01;6.03E-01;5.32E-01;5.34E-01;4.62E-01;2.86E-01
BPNT1	-0.013981	1.28893	4	GGAACCAAGGAATATACCGA;TAATAGCACTGTACTGCGAT;AGTAACCAACTTGTTGCTAT;GTACCTTCTCCACAATACCC	-4.29;-0.34;1.76;2.81	216;41127;75965;77141	1.96E+00;4.29E-01;1.14E+00;6.74E-03	301;1477;36315;77226	1.81E+00;2.68E+00;6.59E-01;4.83E-03
ABHD14A-ACY1	-0.29354	0.6919	9	TAGCTTAGTCAGGTTCACGG;GCCGAGGCGGGCAGATCACG;GCTGGACAGTGCGGATACGC;AGGCCTTTAACTCTCACACG;TCCCACTCAACCAGGCACAC;CTGGCAGCCCCACATACAGT;GGAGGTACAGAATGCCGTGT;CCATGCCTCACGCTTCATGG;AGGCACAAAGGTCATGTGGA	-1.44;-1.31;-0.9;-0.89;-0.46;0.12;0.43;0.46;1.33	18298;20055;27281;27519;37879;54688;62352;63011;74256	6.09E-01;5.28E-01;5.67E-01;6.50E-01;6.19E-01;5.78E-01;5.23E-01;4.92E-01;1.64E-01	3186;14431;15090;22754;39563;49923;50161;57387;59144	5.77E-01;5.30E-01;7.71E-01;7.83E-01;6.00E-01;5.68E-01;6.70E-01;6.74E-01;1.05E+00
LINC00457	-1.52854	0.655112	1	GGAATCTCACTCTGTCACCC	-1.53	17134	0.655	60308	0.109
BCL9	-0.899665	0.652443	5	CGGGAGTCATATGGTCAAGG;AGGTTTCGGATCATTCCGAA;CAAGGCAGGCAGATCACCTG;ATGCTGAAATTACGCCCAGG;TCTCTGATCAAAGGAGTCGG	-2.49;-0.97;-0.53;-0.5;0.0	8975;25840;35879;36736;50926	4.51E-01;4.82E-01;5.43E-01;8.76E-01;9.10E-01	26360;40706;41563;51602;68467	4.92E-01;5.30E-01;4.79E-01;4.83E-01;2.67E-01
BCL6	-0.380582	0.543407	4	CATCTGCAGGTACATAGCCG;TCCCTCACCTGCAGGCCATG;AAGTGATATGCACTACAGTG;CAAGACATCATGGCCTATCG	-0.91;-0.43;-0.27;0.09	26991;38786;43176;53739	4.14E-01;4.26E-01;5.13E-01;6.35E-01	23703;34266;38656;50451	3.88E-01;4.38E-01;6.04E-01;7.44E-01
BCL3	-0.580936	0.432034	4	CTGGAGGCCCGCAATTATGA;CAGGTTCACCAGAGGAAACG;GATCACCACATTACCGTCTG;CGGTGCCGACATCGACGCAG	-2.28;-0.52;0.03;0.46	10446;36093;51964;62918	4.57E-01;4.30E-01;4.01E-01;3.61E-01	14524;25478;41349;66996	3.95E-01;5.34E-01;5.47E-01;2.52E-01
BCL2	-0.514925	0.604324	4	GGCCTTCTTTGAGTTCGGTG;TGTCGCAGAGGGGCTACGAG;CTGACGCCCTTCACCGCGCG;TGGACATCTCGGCGAAGTCG	-3.09;0.1;0.39;0.55	4609;53929;61306;64677	7.03E-01;5.72E-01;3.84E-01;3.13E-01	12765;16136;23513;72837	4.16E-01;7.87E-01;1.11E+00;1.06E-01
NPEPL1	-0.819277	0.533638	4	CGGCCGCCCACTTCATCACG;GCTTTCCATAGGAATCTATG;ACCCGCAGACTACCATGCCG;CCAGACACCCACCTGCAATG	-1.76;-1.52;-0.28;0.28	14657;17252;42882;58851	3.94E-01;7.45E-01;5.18E-01;4.77E-01	18591;34560;60190;62785	3.75E-01;4.36E-01;3.78E-01;3.64E-01
CLMN	-1.3141	1.05565	4	CTTCGTTCTGACTGAAAATG;GTCACCAGCGACCTTGTCAG;ATTGACCAGGTCCTGCAAGG;CCGAAAAATACGATGCGACG	-1.6;-1.48;-1.2;-0.97	16299;17713;21635;25800	3.83E-01;7.29E-01;1.20E+00;1.91E+00	51642;55807;59729;61143	1.01E+00;6.14E-01;3.77E-01;4.11E-01
CLMP	-0.387921	0.511076	4	AGATGTACAAAGCATCGGCA;GGCTGCTCACCGATAATGAA;TCACACTGAGATCAAGAGAG;TGTCTACAATAACTTGACTG	-0.95;-0.59;-0.38;0.36	26285;34445;40149;60707	4.07E-01;4.37E-01;5.71E-01;4.23E-01	16735;37293;42997;51157	3.80E-01;4.27E-01;5.16E-01;7.20E-01
OR7E105P	-0.265841	0.356115	1	GATCCTCTGAGAGTCCCAGG	-0.27	43334	0.252	34108	0.356
MTM1	-0.872812	0.604635	6	TAAAAGTTGCAACTCTCCGG;GGAATCTCACTCTGTCACCC;CAAGGCAGGCAGATCACCTG;GGGGAAACGCGTATCTCGTG;AGCCTCTTGTCGGTATGAGT;ATCCAGTGGAAGAATACAGG	-3.44;-1.53;-0.53;-0.11;0.12;0.25	2471;17134;35879;47770;54568;58058	7.88E-01;5.69E-01;5.12E-01;4.96E-01;5.12E-01;7.51E-01	19384;22874;29672;41563;60308;74976	4.49E-01;4.91E-01;5.78E-01;5.73E-01;4.20E-01;8.43E-02
OR7E53P	-2.19477	0.84451	1	CATCGGTTTCACCTCCACCA	-2.19	11078	0.845	66361	0.0671
CSNK1G2	0.166319	0.902773	5	GCCGAGGCGGGCAGATCACG;CCAGCCCGAAGTCGATGATG;GTACCGCTCCTTGAGCGTGT;ATGGCGTTGTACTTCCCGCA;AGCCGATCTTCTTGCCGACG	-1.31;-0.83;-0.71;0.83;2.85	20055;28723;31494;69527;77158	4.08E-01;4.65E-01;6.26E-01;4.79E-01;7.95E-03	284;7915;45948;48719;57387	1.74E+00;1.12E+00;4.62E-01;5.37E-01;6.51E-01
SERPINB8	0.0119795	0.762435	4	GAAGCATATAAATGACTGGG;GCCTGGAGCTTACCACGGCG;ATTTGACAGAAAGTACACAA;AAAGACGGAGATATTCACCG	-0.55;0.02;0.11;0.47	35471;51685;54301;63236	5.35E-01;5.29E-01;3.85E-01;3.52E-01	14206;23141;25757;41971	3.98E-01;5.79E-01;1.01E+00;1.06E+00
LOC107985068	-0.0661167	0.828982	5	GGAATCTCACTCTGTCACCC;CAAGGGCAGTAACAAGCATG;AGCAGTCAGCACTAGTAGCA;TCGTTTCAAAGTAACTCTCC;TGAACACGGGATGCTTCGTG	-1.53;-1.13;0.62;0.7;1.01	17134;22913;66023;67527;71726	3.91E-01;5.15E-01;8.71E-01;4.32E-01;1.66E-01	5716;9915;11419;54529;60308	5.66E-01;9.64E-01;1.63E+00;4.39E-01;5.43E-01
CSNK1G1	-0.463602	0.6231	6	TCGCCCAAGCTAGAGTGCAG;CAAGGCAGGCAGATCACCTG;AACTTCCTGATTGGTCGACA;ATGGCATTATATTTCCCACA;AAGTAAATGTTCGGTCACAG;TCCCACCATAAGAACCCCAG	-1.41;-0.53;-0.47;-0.38;-0.34;0.35	18711;35879;37588;40000;41152;60532	4.39E-01;5.73E-01;5.06E-01;6.03E-01;9.24E-01;6.42E-01	16910;36290;37442;39854;41563;58730	4.18E-01;5.81E-01;5.07E-01;6.06E-01;9.07E-01;7.21E-01
ALOX12-AS1	-1.20715	0.810656	4	TCCATCTTCAGCATAACGAG;TGAAGCTCTTCCATCCCCGA;CCCCCATATCCGCTACACCA;TCCAAATATGAGATTCCATG	-2.03;-1.41;-1.19;-0.2	12352;18600;21943;45182	4.22E-01;6.99E-01;1.19E+00;9.36E-01	32260;55500;58842;65090	4.80E-01;6.07E-01;3.75E-01;3.02E-01
SERPINB1	-0.0218234	0.674158	4	GAGATGAAGATGTTTCCAGC;TCTGAATGGTGCATTCGTCG;AATGCTGATATCAACAAACG;CAAGGAAGACCATAAACCAG	-1.31;-0.29;0.35;1.16	20080;42602;60510;73051	3.75E-01;4.35E-01;3.80E-01;1.01E-01	4391;16932;34840;57362	7.20E-01;7.57E-01;6.98E-01;5.21E-01
SERPINB3	-1.31068	0.735809	4	TGAAATCGATGGTCTCCAGA;TGCGTTCACAAGAACCAATG;AAAATCAACAGATTCCACAC;GGCCTGTACATCCTCCAGCG	-3.13;-1.35;-0.97;0.2	4299;19438;25861;56805	7.28E-01;6.74E-01;1.00E+00;5.38E-01	20637;51581;58004;73144	3.76E-01;5.27E-01;3.75E-01;9.92E-02
SERPINB2	-0.574821	0.471182	4	AAAGTTCTCTGGAGTCATGG;ATTCTAGGAAGTCTACTGCC;CATACCGAGTTTACACGGAA;TGGGTCAAGACTCAAACCAA	-1.41;-0.82;-0.47;0.39	18660;29050;37703;61438	3.75E-01;4.82E-01;6.25E-01;4.02E-01	16004;39739;48392;58782	3.84E-01;4.27E-01;4.36E-01;4.79E-01
SERPINB5	0.106498	0.78745	4	TCAATTAAGGATCTCACAGA;TACGAAGAGACCGTATGCAA;AATGTTTCCCATACAGAACG;CTATGTGAAAAGGAGCCACT	-0.65;-0.32;-0.27;1.66	32965;41747;43326;75688	4.91E-01;4.31E-01;5.11E-01;3.98E-02	1754;34116;35695;44477	1.07E+00;4.38E-01;6.75E-01;9.63E-01
SERPINB4	-0.349081	0.688543	4	TATTGGCAATGATACGACAC;ACAAATCTGTACAGATGATG;AAAATCAGTAGATTCCACAC;CACTGCACAACAAATTAGCA	-3.22;-0.84;0.02;2.64	3705;28488;51937;77055	7.82E-01;4.89E-01;4.01E-01;8.68E-03	387;25505;48954;73738	1.71E+00;5.34E-01;4.30E-01;8.51E-02
SERPINB7	-1.74481	1.09705	4	AGAGAGATGGATGACAATCA;AGTCGTAACTTACTTCAGAG;TAGACGTAATATTAATAAGT;AGTCATCTTGAGCGCCCAAG	-3.04;-1.9;-1.47;-0.57	4942;13395;17874;35069	6.79E-01;9.11E-01;1.42E+00;1.38E+00	42373;59565;64047;72503	6.92E-01;7.23E-01;4.07E-01;1.14E-01
BRSK2	0.269797	1.00163	5	CATACCTATCTCGTTCCGGG;CAGTCGGGCGGGATAAAGTG;TCCTGCCTCAGCCTCCCGAG;GCCTGTTGGAGACCAGCTGT;GTGCTAGAACACGTGTCAGG	-0.84;-0.63;-0.4;1.18;2.04	28509;33437;39519;73243;76517	5.33E-01;4.66E-01;4.97E-01;6.64E-01;2.61E-02	925;4199;37923;44005;48933	1.24E+00;1.60E+00;5.15E-01;6.48E-01;9.97E-01
FAM76B	0.54365	1.38646	4	AAAGAACAAAGGAAGAGCCT;CCTTTCGAGGAGCTCTCCCA;TTCATTCTGAATTGTTGCAG;AAATGTGAAGCAATTTGGGA	0.29;0.33;0.61;0.94	59042;59900;65863;71015	1.39E+00;7.35E-01;4.34E-01;1.50E-01	6427;11579;17542;18400	5.92E-01;1.01E+00;1.44E+00;2.50E+00
FAM76A	-0.864797	0.655125	6	CCTGAGACAGCGCCTCGAAG;GCCGAGGCGGGCAGATCACG;CAGCACGAGAAGAGCTACTC;CAAGGCAGGCAGATCACCTG;GAGCAGTATAGTCGCCTGAG;ATTATGTTGCAATACTGACA	-2.52;-1.31;-0.76;-0.53;-0.08;0.02	8818;20055;30189;35879;48666;51693	4.28E-01;5.18E-01;5.70E-01;7.01E-01;6.61E-01;1.05E+00	25749;28776;41563;47253;57387;68624	5.78E-01;4.91E-01;5.12E-01;5.00E-01;4.59E-01;3.15E-01
EXD3	-1.29086	1.10855	5	GGCCACATAGCGCTCCACGA;GAAGACCTGACCAGACACGA;GCCGAGGCGGGCAGATCACG;GGCACGAACTCACCTGCACA;TGGTGATAGAGGGGTCCGAG	-1.79;-1.52;-1.31;-1.19;-0.65	14412;17270;20055;21800;32970	3.89E-01;6.32E-01;1.02E+00;1.65E+00;1.85E+00	44472;55642;57387;60172;63030	1.03E+00;9.39E-01;5.64E-01;3.91E-01;4.47E-01
EXD2	-0.978548	0.523123	4	ACGGATCCTTAAAGCAAAGG;GCAGGCGAACCAAGACACAC;GGATGCTGAGACTCTCACAG;ACCTCCGATACCTAGCCATG	-3.04;-1.28;-0.35;0.76	4944;20442;41058;68385	6.79E-01;6.45E-01;5.53E-01;2.16E-01	9057;36384;57000;72486	4.92E-01;4.29E-01;3.76E-01;1.15E-01
EXD1	-0.486518	0.613086	7	GCCGAGGCGGGCAGATCACG;GGAAGTCGAGCTTTCCACAA;CAAGCGAAGGGGTAACAGGT;CAAGGCAGGCAGATCACCTG;TCCTGCCTCAGCCTCCCGAG;GAATATAGGGTGAATGCACA;GAATAATGTCTTTGACACAC	-1.31;-1.06;-0.59;-0.53;-0.4;0.18;0.29	20055;24181;34535;35879;39519;56317;59087	5.23E-01;5.02E-01;5.34E-01;6.03E-01;7.59E-01;5.49E-01;8.22E-01	18355;21125;37923;41563;42907;53261;57387	4.85E-01;4.98E-01;5.55E-01;5.39E-01;6.61E-01;6.36E-01;9.11E-01
ELP6	-1.08518	0.662766	4	CTTTAGTTCCCAGCACACGG;TCTGTGATGCCAAGACAGAT;CTTCAGCCACTACAGTATCG;ATTGTTTGAGTTTGTACGGG	-2.59;-1.12;-0.4;-0.23	8314;23108;39445;44312	5.15E-01;5.80E-01;5.86E-01;9.70E-01	33130;37997;54334;69126	4.94E-01;4.26E-01;3.85E-01;1.97E-01
ELP5	-1.59203	0.992885	4	ATGCAGGACCTGGCAGAGTG;GGGCCTCCGACACAGGATGT;CACACTCACTTTCCCCACTG;AGGATCTGTCCTCTTGCACA	-2.59;-2.2;-1.03;-0.55	8344;11016;24696;35507	5.14E-01;1.05E+00;1.05E+00;1.35E+00	41935;52746;66426;69098	6.80E-01;5.48E-01;4.45E-01;1.98E-01
ELP4	-2.17685	1.56934	5	CCAGTTATTACCCAAGATGG;GCCAGCGTGACCAACGACAG;CCAACGGCTAAACCTCCACC;AATGCCACAAGAACTAATTG;CAAGGCAGGCAGATCACCTG	-3.61;-3.16;-2.15;-1.43;-0.53	1669;4105;11383;18441;35879	1.01E+00;1.62E+00;1.64E+00;1.91E+00;1.67E+00	41563;59001;66064;73340;75762	9.08E-01;1.11E+00;8.73E-01;6.72E-01;4.76E-02
ELP3	-1.52039	0.896662	4	TATTCCACCCAGTCTTACAC;TACTTCCAACAATATTTACG;AAAACAACTTGGTCATAGTG;TCCGAGCCACCAATTCAACC	-3.14;-2.9;-1.26;1.21	4219;5996;20778;73526	7.35E-01;1.51E+00;1.25E+00;9.01E-02	3916;56664;71451;73215	7.62E-01;6.36E-01;6.14E-01;9.75E-02
ELP2	-1.37795	0.812998	4	GTTATTGTACAGGTTCGAGT;AATTTCATGCCAAGTCACCT;CCAGTACCAATATTAGCATG;TGATAATCAAGTGATTCACT	-3.59;-1.95;-1.14;1.17	1744;13017;22699;73158	1.08E+00;9.31E-01;1.15E+00;9.88E-02	4284;54743;64425;75699	7.29E-01;5.89E-01;4.12E-01;3.95E-02
ELP1	-0.834457	0.503883	4	AATGGTGAATGACAGACCGG;TGGACGACTGACCGGAGCGT;GATTTATGATCATAACCCTA;CAGCAATCATGTGTCCCATG	-3.22;-1.58;0.22;1.24	3697;16523;57156;73733	7.83E-01;7.72E-01;3.75E-01;8.52E-02	3709;20286;60919;73745	7.82E-01;6.49E-01;3.81E-01;8.50E-02
SPRYD3	-0.545567	0.531842	4	TGGGTCAAAGTGCAACTCCG;GCAAAAGCATCGTGGATGTG;AGAAATGCTACATCGCCCTG;GACAGTTACGAGGATGAATG	-3.16;-0.65;0.19;1.44	4092;33003;56411;74810	7.46E-01;4.45E-01;3.77E-01;6.00E-02	2632;21031;44439;73344	9.12E-01;6.29E-01;4.92E-01;9.44E-02
SPRYD4	-0.600492	0.469359	4	TACGGGTGTCAAATATGGCT;CAGTTTGAAACTGACGCCTG;CCGCTGGGGAGCCAAACGAT;CTGGGCATAGGTGAACACCC	-2.83;-0.55;0.34;0.63	6539;35496;60259;66250	5.86E-01;4.32E-01;3.79E-01;2.71E-01	11192;17183;41946;70913	4.41E-01;7.48E-01;5.36E-01;1.53E-01
SPRYD7	0.35088	1.01558	4	CTGTGCATATCTCGGCCAAG;GACTGGCCACATCCCTCTGA;AGTACCATTATACCAACCTG;GCAAACAGTCTTCCGCAGGA	-0.27;0.07;0.45;1.15	43269;53224;62816;72977	7.17E-01;5.57E-01;3.95E-01;1.03E-01	4465;14626;24218;34173	7.14E-01;8.51E-01;1.08E+00;1.42E+00
RAC2	0.0377381	0.733514	4	ACAGCAAGCCAGTGAACCTG;TTATGAGAACGTCCGCGCCA;ATCCCCAGGAACTCACACGG;TCTGTGGATAGGAGAGCGGC	-1.1;0.02;0.3;0.93	23419;51875;59244;70774	3.87E-01;5.32E-01;3.76E-01;1.56E-01	6668;18198;25567;54023	5.80E-01;7.12E-01;1.02E+00;6.26E-01
KLHDC4	-0.7973	0.563587	4	CTTCCATGAAAGTACACGGT;CTCAAACCAACGGTTCCTGG;TAGACGACGATGCCGCCCTG;TCCAGACACTCGATGCCAAG	-1.56;-1.26;-0.74;0.37	16770;20728;30875;60816	3.80E-01;6.37E-01;8.17E-01;4.20E-01	16626;46567;56714;60672	3.81E-01;4.62E-01;3.76E-01;4.24E-01
KLHDC2	-0.629657	0.420005	4	CTTCGAGAGCTATGAGTCCA;CTACAGACAGAGTGTTACAG;CTATCTTAATCTGGATACAT;AGAACTATGGATCTACAACA	-1.99;-1.16;-0.2;0.83	12611;22371;45328;69509	4.18E-01;5.97E-01;4.78E-01;1.88E-01	7933;32114;55071;64831	5.28E-01;4.52E-01;3.81E-01;3.09E-01
KLHDC3	-1.00752	0.575684	4	ACCAGAGCAGTAACCCCCGA;TAGCGCATGTAGGGTACCAC;GGCGGGCGGAATGACACCGA;ACAGATAAGAGTCCATGTCA	-2.98;-0.98;-0.11;0.04	5357;25614;47828;52465	6.51E-01;5.32E-01;4.43E-01;6.76E-01	24977;29614;51828;72089	3.97E-01;4.75E-01;4.02E-01;1.24E-01
KLHDC1	0.0826048	0.797299	5	AAGAACTGCACATGTATGCG;CAAGGCAGGCAGATCACCTG;CAGCAGGAAAGTTTATCACG;ACTATCTAAACCTAGACACC;ACGGAAACTTCCTCTACGTG	-0.72;-0.53;-0.01;0.29;1.38	31246;35879;50629;59111;74542	5.93E-01;4.79E-01;4.75E-01;3.96E-01;8.29E-02	2900;18332;26813;41563;46196	7.94E-01;6.03E-01;7.51E-01;7.16E-01;1.12E+00
ASXL1	-0.872796	0.716671	5	TTTCACGTATCAAACCACCC;GCCGAGGCGGGCAGATCACG;ATCTGACGTACACTTTCCAG;GAATCAGTGCGTATACAGCG;GGTCAAATGAAGCGCAACAG	-1.54;-1.31;-1.02;-0.4;-0.1	16991;20055;24947;39630;47981	3.90E-01;5.64E-01;8.14E-01;7.76E-01;1.04E+00	29461;37812;52495;57387;60451	5.52E-01;4.96E-01;4.90E-01;4.08E-01;5.38E-01
TRIM51	-0.673513	0.602838	5	AAATCTCAGAAATCTGAACA;CTGAATGCAAGAAGACAACG;ACATACACTGTCCCATTGAG;TGAATCCAGAGCTCAGTGCA;ACTCACCTCTGAATCCACTG	-1.61;-1.04;-0.88;-0.85;1.02	16186;24439;27618;28440;71814	3.88E-01;4.96E-01;7.26E-01;1.24E+00;1.64E-01	5628;49002;49824;53003;61256	5.71E-01;7.03E-01;4.70E-01;4.61E-01;5.09E-01
ASXL3	-0.281423	0.676407	4	AGGTAAGTCAGACATCGGTG;CAAGTTCTGGAATTGAAGCA;TCCCATTTCAGCCACTACAG;AATGGTGTCAAAACAACACG	-2.84;-0.08;0.32;1.47	6429;48663;59765;74967	5.92E-01;4.85E-01;3.77E-01;5.64E-02	2475;17677;28779;71013	9.36E-01;7.30E-01;8.89E-01;1.51E-01
RAC1	-1.17765	0.688075	4	CTGGGCTTATGGGATACAGC;CTGTTTGCGGATAGGATAGG;ATTTAAGATACTTACACAGT;TCACATCTAGTGGTATCCTG	-2.77;-1.62;-1.25;0.93	6919;16053;20930;70886	5.69E-01;7.90E-01;1.24E+00;1.54E-01	6556;56512;61389;70515	5.86E-01;6.32E-01;3.84E-01;1.63E-01
HDDC2	-0.158598	0.592493	4	TTCTGCCATATCATGAACCA;GATAACCCAGCTCCTACCAG;GGGTATACAGAAATGTCCAG;CCATAGCCATAACTGCCATC	-1.32;-0.57;0.37;0.89	19936;34956;60808;70309	3.75E-01;4.34E-01;3.81E-01;1.68E-01	7133;16634;42486;57506	5.60E-01;7.68E-01;5.26E-01;5.17E-01
HDDC3	-0.515027	0.503804	4	AGCGGCGGAAGGACCCCGAG;ACATCAACCACCCCATCGGT;TACACTTTGGGGCACAAGTG;GGCCCTGCTCCATGACACGG	-1.45;-0.36;-0.27;0.02	18164;40543;43303;51747	3.76E-01;4.28E-01;5.11E-01;7.00E-01	25695;34139;36899;59278	4.02E-01;4.38E-01;6.45E-01;4.64E-01
DONSON	-0.533876	0.469685	4	GAAGGTACAACGGAGCTCAG;AGGTACAAACGTAGAAATAG;CCCGCCTGGACAACCGACCG;TGAGGACGGAATATCAGGCT	-2.15;-0.27;-0.02;0.3	11432;43335;50300;59180	4.37E-01;4.38E-01;4.15E-01;4.67E-01	18262;27142;34107;66020	3.76E-01;5.07E-01;7.18E-01;2.77E-01
SPATA13	-1.12166	0.990879	8	GGGAGATCATGGACACCGAG;GAGAATCGCTTGAATCCGGG;GGAATCTCACTCTGTCACCC;GCCGAGGCGGGCAGATCACG;ACTTACTCTGACGAAGCTCG;CACACGGTCCAACCCAATGG;CAAGGCAGGCAGATCACCTG;AGTGGATGACAACGGTAGTG	-2.74;-1.64;-1.53;-1.31;-0.63;-0.55;-0.53;-0.05	7185;15856;17134;20055;33473;35447;35879;49517	4.25E-01;5.27E-01;7.60E-01;1.02E+00;8.11E-01;1.12E+00;1.71E+00;1.55E+00	27925;41563;41995;43969;57387;60308;61585;70267	8.99E-01;1.10E+00;7.46E-01;5.95E-01;6.63E-01;5.15E-01;4.82E-01;3.38E-01
SPATA12	-0.115239	0.71941	4	CATGATGCCAGTGCACAGTG;TACAGCGATGTCAAGAGAGA;CCAGCTCTCCTGATACAGCA;ATCTCTGACAGGTCTCACTT	-0.43;-0.24;0.07;0.14	38727;43988;53124;55218	6.02E-01;4.42E-01;3.92E-01;5.88E-01	22224;24318;33454;38715	3.81E-01;5.55E-01;7.37E-01;1.20E+00
SPATA17	0.307495	1.07476	5	CATTGCTTTCTATTAATAGG;CAAGGCAGGCAGATCACCTG;CAGAAAAGAGCCTGATCCAT;TAGCCAATCAGTAAGGCTGG;AGAAGAAGGCTAACCTCGAA	-0.75;-0.53;0.51;1.03;1.28	30518;35879;63991;71923;74005	5.76E-01;4.79E-01;7.69E-01;5.77E-01;9.86E-02	3437;5519;13451;41563;46924	7.33E-01;1.39E+00;1.45E+00;7.16E-01;1.09E+00
SPATA16	-0.813531	0.545488	5	TTGCCCTGAATCATGCACAC;TCTTCAGCAGGTGCATCAAA;GATGACCAGTCAACTGTCTG;CAAGGCAGGCAGATCACCTG;TTCCTCTTAGGCCATGATTG	-2.52;-1.25;-0.74;-0.53;0.98	8782;20911;30842;35879;71406	4.55E-01;5.47E-01;6.41E-01;9.08E-01;1.76E-01	6036;41563;46600;56531;68660	5.50E-01;5.43E-01;4.61E-01;4.16E-01;2.61E-01
SPATA19	-0.449789	0.477837	4	CATCCACGTGACCAGAGATG;CATTGACGTTGTGGAAAGTG;ACATCTTCTCCCTTACACCC;TTACCGAACTGGTTATTGGT	-1.06;-0.79;-0.24;0.28	24129;29729;44081;58859	3.91E-01;4.74E-01;4.98E-01;4.77E-01	18583;33361;47713;53313	3.75E-01;4.43E-01;4.45E-01;6.49E-01
SPATA18	0.375791	1.08016	5	GATGTAGATGATCCGCTGAA;CAAGGCAGGCAGATCACCTG;GCTGAGAAAAGTGCACTCCA;TGTTGCATATCCCGATCCCG;GCCACAGAAACACAGATCAG	-0.56;-0.53;0.06;1.04;1.87	35189;35879;52981;72050;76216	6.96E-01;4.79E-01;4.96E-01;5.84E-01;3.46E-02	1226;5392;24461;41563;42253	1.13E+00;1.41E+00;8.31E-01;7.16E-01;1.32E+00
CPLX2	-0.695539	0.596984	4	TAGGGGCCACAAAGGACATG;GGCCAAGCACGCGCGCATGG;CCCCGACGCGCAGAAAAAGG;CCGGCAGCAGATCCGAGATA	-1.47;-0.64;-0.46;-0.21	17872;33027;38005;44872	3.77E-01;4.45E-01;6.18E-01;9.48E-01	32570;39437;44415;59570	4.85E-01;4.26E-01;4.92E-01;4.56E-01
TRIM53AP	-1.31607	0.678724	3	AAGCCAAAATGGCTCATAGG;CAGACACCGTCCCATTGAGT;CAGCAGCCCACTCAATGGGA	-3.33;-0.52;-0.09	3037;36147;48330	9.64E-01;4.58E-01;6.14E-01	29112;41295;74408	3.57E-01;4.00E-01;5.21E-02
TUBB8P10	-0.974207	0.478413	1	GTGTACTACAACGAGGCCAG	-0.97	25737	0.478	51705	0.175
RINL	-0.388455	0.495153	4	GACCAGAGACTGGACGTGAA;TGTGCGGAGTCGTGTCCACA;AGATCCTGTGCAGATCGGCA;GGCAAAGGACTCCTACATCA	-0.98;-0.95;-0.1;0.47	25540;26226;48202;63280	4.01E-01;5.21E-01;4.39E-01;3.51E-01	14162;29240;51216;51902	3.99E-01;4.80E-01;4.07E-01;6.95E-01
HFE	-0.618719	0.462865	4	TGATCATGAGAGTCGCCGTG;GCAAGAAGACAACAGTACCG;TGATGTGTCACCTTCACCAA;GTAGCCCAAAGCTTCAAACA	-2.06;-1.44;-0.11;1.13	12103;18279;47800;72862	4.25E-01;7.10E-01;4.44E-01;1.06E-01	4580;29642;59163;65339	7.05E-01;4.75E-01;3.76E-01;2.95E-01
GPR146	-0.155365	0.596723	4	TGGCCAGCGTGTACAACACG;GGAGTACATGGCCACCAGTG;GACAAAGTACACGTCCGGCA;GGCGCACTCTAGCGCGCGGG	-1.18;-0.68;0.38;0.85	22069;32175;61211;69872	3.80E-01;4.51E-01;3.83E-01;1.79E-01	7570;16231;45267;55373	5.42E-01;7.83E-01;4.79E-01;5.83E-01
GPR141	0.195694	0.878545	4	ACATCCAAGTCTTCTTGATG;CCATACCGGGAGACAACCAG;CAAGTTAATGACCGCCATGG;CCACATAGAATAGGAACGTG	-0.5;-0.29;0.73;0.84	36701;42728;68001;69668	5.59E-01;4.35E-01;4.81E-01;1.84E-01	7774;9441;34714;40741	5.34E-01;1.16E+00;7.02E-01;1.12E+00
GPR142	-0.664986	0.534694	4	CACCTGGATGATGATATCCG;GAAGGGGATGCCGGTCAACA;GTGTCTGCGTAAGGATCCTG;ACTGGCCAGAGATCGCAGAG	-1.94;-1.24;-0.93;1.46	13058;21038;26568;74899	4.12E-01;6.29E-01;9.74E-01;5.80E-02	2543;50874;56404;64384	9.25E-01;5.16E-01;3.77E-01;3.21E-01
GPR143	-0.179214	0.692248	5	TTTACACGGAGAACGAGAGG;CAGCAGGCCAAATTTCCGTG;TCCTGCCTCAGCCTCCCGAG;AGGTACATGGTGACATAGTG;CTGTATCACATCATGGCGTG	-0.57;-0.52;-0.4;-0.19;0.79	34903;36116;39519;45675;68864	6.88E-01;4.81E-01;4.97E-01;6.05E-01;2.55E-01	8578;31767;37923;41326;42539	4.61E-01;4.62E-01;5.15E-01;7.23E-01;1.30E+00
ZNF212	-0.843787	0.528636	4	CGTCCAGAGTGAAATCTCGG;ACAGGAGCTACAGTATACAC;CACACTCAGAACATTCGTAG;CCAGAGCAGACCGAACTCTG	-2.46;-0.61;-0.57;0.26	9231;33830;35003;58279	4.87E-01;4.40E-01;6.94E-01;4.94E-01	19163;42439;43612;68220	3.75E-01;4.34E-01;5.06E-01;2.20E-01
GPR148	-0.44706	0.460284	4	GAACAGAACGCACAGAATGG;TGAGCCAAATAAGGAATGTG;TGAGAATGCCACAGGCCATG;TACATCCTACCACCAAGCAT	-1.52;-0.78;0.09;0.42	17244;29835;53832;62008	3.78E-01;4.73E-01;3.88E-01;3.86E-01	15434;23610;47607;60198	3.88E-01;5.69E-01;4.46E-01;4.38E-01
GPR149	-1.20879	0.732201	4	ATACGATGCACAGAGGTGTG;TGGTGGTCCAGAACGTCGTG;TCACCGATTGCTGTGTTCGG;ACAGAAATTGGAAGTAACCG	-3.78;-0.93;-0.16;0.03	1099;26691;46439;52105	1.26E+00;5.14E-01;4.62E-01;6.88E-01	25337;31003;50751;76343	3.99E-01;4.61E-01;4.11E-01;2.48E-02
LOC105376806	-1.5217	0.652837	1	ACCCACTATAGCGACCAGAT	-1.52	17224	0.653	60218	0.109
SLC7A6	-1.56387	0.911016	4	GTCTGGTCAGCAAATGTCTG;TACCCTGGCACAGTTTAACA;CAACTAGCAGTGAGACCCAC;TGGGCAACATGATCGGCTCA	-3.19;-2.89;-1.27;1.1	3933;6034;20539;72526	7.60E-01;1.51E+00;1.26E+00;1.14E-01	4916;56903;71410;73509	6.81E-01;6.42E-01;6.12E-01;9.05E-02
KNL1	-0.793855	0.840508	8	GAGAATCGCTTGAATCCGGG;GCCGAGGCGGGCAGATCACG;AGCCATAATATAGTCTACTG;ACAGAAACCTAAATTTCCAA;AGTGATATGTACTCCTACTG;CAAGGCAGGCAGATCACCTG;TGAAGAAAATAAGCCAGGCA;TACCAGAAGTCATATTATGG	-1.64;-1.31;-1.02;-0.98;-0.89;-0.53;-0.41;0.43	15856;20055;24799;25514;27550;35879;39387;62316	4.82E-01;5.07E-01;5.74E-01;7.78E-01;1.07E+00;1.10E+00;1.46E+00;7.55E-01	15126;38055;41563;49892;51928;52643;57387;61585	4.67E-01;9.32E-01;7.33E-01;7.14E-01;5.66E-01;5.48E-01;5.95E-01;7.96E-01
SLC7A7	-0.382956	0.580014	6	GCCGAGGCGGGCAGATCACG;GGCATTGTTAGACTTGGCCA;TCCTGCCTCAGCCTCCCGAG;TGTATATGAGCACACCCTTG;CAGGATAATGCAACTGACAG;GAAAGCAAGGAATCCTCCAA	-1.31;-1.21;-0.4;0.05;0.05;0.52	20055;21615;39519;52592;52698;64114	4.59E-01;5.01E-01;5.06E-01;4.83E-01;5.53E-01;4.92E-01	13328;24744;24850;37923;55827;57387	3.96E-01;4.84E-01;6.84E-01;6.49E-01;4.87E-01;7.81E-01
CITED2	-0.708278	0.447662	4	GCAGCCCATTGGTGCCGTCG;ATGGGCGAGCACATACACTA;GCGGCATCAGGCATGCGATG;GTTGTTAAACCTGGCCGCGG	-3.1;-0.46;-0.29;1.02	4483;37842;42739;71848	7.13E-01;4.26E-01;5.21E-01;1.30E-01	5594;34703;39600;72959	6.37E-01;4.35E-01;5.83E-01;1.04E-01
CITED1	1.23194	2.16328	4	AACTTAATAGCCAGTATCAG;TTCCATTTGAGGCTACCCCA;CGTGGCCTACTCCAACCTTG;AGAGCCTATTGGAGATCCCG	0.35;0.9;1.21;2.47	60439;70497;73484;76932	1.48E+00;1.40E+00;7.58E-01;1.15E-02	510;3958;6945;17003	1.59E+00;1.85E+00;2.58E+00;2.63E+00
HLA-A	-0.782153	0.640461	4	GGATGTGAAGAAATACCTCA;TACCGGCAGGACGCCTACGA;CACGCACGTGCCATCCAGGT;CCAGTCACAGACTGACCGAG	-1.33;-1.07;-0.48;-0.25	19743;23905;37242;43877	3.75E-01;5.63E-01;6.37E-01;9.87E-01	33565;40200;53537;57699	5.01E-01;4.27E-01;3.89E-01;5.11E-01
CITED4	-0.7254	0.434855	4	GCGCCCCCCAACGCTCCGGG;CCTGTGGCGACGCCGTACCC;CCCGAAGGCCCCGTACGCCA;GCAGAGTCCGGAGCGCATGA	-2.85;-0.62;-0.04;0.61	6339;33697;49643;65900	5.96E-01;4.41E-01;4.22E-01;2.80E-01	11542;27799;43745;71095	4.35E-01;4.98E-01;5.03E-01;1.49E-01
DAGLA	-0.954458	0.608972	5	GGGCTATAGTTAGGTCGCTG;AGAGATGCTCCGCTACAAAG;CAAGGCAGGCAGATCACCTG;AAGTGGTGATCAGTATCCGG;TGGCTTGACCCTCCTCTAAG	-3.62;-1.07;-0.53;0.11;0.35	1618;23846;35879;54350;60392	1.02E+00;5.03E-01;5.43E-01;4.42E-01;5.40E-01	17050;23092;41563;53596;75826	3.90E-01;5.12E-01;4.79E-01;4.52E-01;4.58E-02
DAGLB	0.0205518	0.762279	4	CGGCATCATCGCAACCGTCG;AGCTTAGACATAGACTTCCG;ACGTTGTATCTCATGCACAG;ACCACAGACTATGACTTGGT	-0.31;-0.26;-0.07;0.72	42063;43419;48972;67888	6.84E-01;4.39E-01;4.30E-01;2.29E-01	9554;28470;34023;35379	4.78E-01;4.89E-01;7.21E-01;1.36E+00
SLC7A2	0.809281	1.50551	4	ATTCAAACGCTACAGGAAGG;GCCATAGCATAGATTACACG;GGTCCATGGTGGATAAGCAG;AAACGGAACAAGTATCTATG	-0.09;0.39;0.95;1.98	48422;61425;71073;76430	8.81E-01;7.92E-01;5.95E-01;2.28E-02	1012;6369;16017;29020	1.30E+00;1.47E+00;1.55E+00;1.71E+00
SLC7A3	0.235736	0.851552	4	ACCTGGTAGAAAGAGCACAG;CCCATCGGGATGGAACGCTG;GTACTTGCTCGGATCCACAC;AGATATGCCGAACCAGAACG	-0.78;-0.07;0.28;1.52	29792;48860;58697;75181	4.46E-01;4.88E-01;3.75E-01;5.15E-02	2261;18745;28582;47650	9.71E-01;6.95E-01;8.97E-01;8.44E-01
SLC7A1	0.38785	1.14716	5	AGTAGGGCATCATGAGCGTG;CAAGGCAGGCAGATCACCTG;GTGGCTGGCGGACATACCTG;GCTGATAGGCAGACCCATCG;TAAAAACTGGCAGCTCACGG	-0.85;-0.53;0.55;1.15;1.62	28405;35879;64756;72990;75554	5.30E-01;4.79E-01;8.04E-01;6.44E-01;5.36E-02	1888;4452;12686;41563;49037	9.57E-01;1.56E+00;1.51E+00;7.16E-01;9.92E-01
CSNK1A1L	0.121783	0.841851	4	ATACATGAAAACGTAGCCTA;CTGACCATACCAGTGCATGT;TGCTCTCATACAGCAACTGG;GAGGGAAATACAAACTGGTG	-0.26;-0.24;0.34;0.64	43488;44128;60278;66467	7.23E-01;4.43E-01;3.79E-01;2.65E-01	10975;17164;33314;33954	4.46E-01;7.48E-01;7.41E-01;1.43E+00
HIRA	-0.168922	0.669909	6	GGAATCTCACTCTGTCACCC;ATGTCTGAAACGGCCGCTGG;CAAGGCAGGCAGATCACCTG;GGGTTGACATGGGACCCTGT;TGTGTGCGGTGGTCAAACAG;GAGCCTAGCCATCATGACCG	-1.53;-1.17;-0.53;0.12;0.57;1.52	17134;22122;35879;54672;65246;75198	4.20E-01;4.97E-01;5.12E-01;4.92E-01;3.97E-01;7.66E-02	2244;12196;22770;41563;55320;60308	8.24E-01;7.27E-01;7.47E-01;5.73E-01;4.96E-01;6.52E-01
RIN1	-0.657996	0.50814	4	GGGTGTTAGATTTCCGCACG;TATGACGTGCCCAATGCCAG;GCTCCCTACTGGCACCGGAG;CTCAACATCAAGGCTCAGCG	-2.87;-0.05;0.09;0.19	6199;49463;53858;56546	6.03E-01;4.96E-01;3.87E-01;5.46E-01	20896;23584;27979;71257	3.77E-01;5.70E-01;9.19E-01;1.45E-01
RIN3	-0.33939	0.683825	5	AATGGTGTATTCGAGCACCT;GGAATCTCACTCTGTCACCC;GGCCTGAGGCTGGAGACTAG;CCTTAGAAGACCAAAGTCCG;TCATCAAAACATGCCCGGTG	-2.04;-1.53;-0.71;-0.24;2.82	12219;17134;31539;44026;77148	4.01E-01;6.36E-01;6.25E-01;6.47E-01;8.23E-03	294;33416;45903;60308;65223	1.73E+00;4.66E-01;4.62E-01;3.91E-01;3.73E-01
RIN2	-0.523985	0.596485	7	CACCTGAACCTGGGAGACAG;CAAGGCAGGCAGATCACCTG;TCCTGCCTCAGCCTCCCGAG;AGTGGGGCCCCAAATTCACA;GGCCCTTGTGCAATCCCCCG;TGGAGACTATTAATAGCGGG;AGCAGCCTGGAGGACTACGA	-3.23;-0.53;-0.4;-0.36;-0.18;0.45;0.58	3622;35879;39519;40749;45816;62742;65378	6.10E-01;6.97E-01;5.73E-01;5.45E-01;5.95E-01;4.25E-01;5.15E-01	12064;14700;31626;36693;37923;41563;73814	4.04E-01;5.78E-01;5.35E-01;5.90E-01;8.12E-01;1.11E+00;1.46E-01
WWOX	-0.145156	0.739487	7	GGAATCTCACTCTGTCACCC;GCCGAGGCGGGCAGATCACG;CCAAGATCACATGTGCACCA;CAAGGCAGGCAGATCACCTG;CAAGGTAGAAGCAATGACCC;ACACCGAGGAGAAGACTCAG;GCCGTCGTATCTTTGCCGGG	-1.53;-1.31;-0.65;-0.53;0.48;0.62;1.91	17134;20055;32851;35879;63364;66020;76287	4.62E-01;5.02E-01;5.32E-01;6.03E-01;5.94E-01;4.02E-01;4.56E-02	1155;11422;14078;41563;44591;57387;60308	1.02E+00;6.87E-01;1.03E+00;5.39E-01;6.21E-01;5.23E-01;7.60E-01
LNX1-AS1	-1.52854	0.655112	1	GGAATCTCACTCTGTCACCC	-1.53	17134	0.655	60308	0.109
RIPK1	-0.696234	0.509184	4	CCATGCGGCTGCCATAAAGA;GGGAAGCGAATCCGGAAGCT;GGCACCGCTAAGAAGAATGG;TGGAAAAGGCGTGATACACA	-1.47;-1.26;-0.56;0.51	17909;20677;35188;63938	3.76E-01;6.39E-01;6.89E-01;3.33E-01	13504;42254;56765;59533	4.06E-01;4.33E-01;3.76E-01;4.57E-01
RIPK3	-0.698197	0.47534	4	GTTTGTTAACGTAAACCGGA;TCCCGGCTTAGAAGGACTGA;ACTGCTTCGTACACGAGTGA;CGGGCGCAACATAGGAAGTG	-2.22;-0.54;-0.28;0.25	10891;35638;43013;57857	4.47E-01;4.31E-01;5.16E-01;5.06E-01	19585;34429;41804;66551	3.75E-01;4.37E-01;5.38E-01;2.63E-01
RIPK2	-0.397871	0.52168	4	ACAGCTATGCAGTTATCACA;TGTAAATCATGGTCCACAAG;ACTGCCTACCTGTCGAGCAG;GAGATCATACGTGCTCGGTG	-0.91;-0.56;-0.48;0.35	27112;35279;37350;60488	4.15E-01;4.33E-01;6.34E-01;4.29E-01	16954;40092;42163;50330	3.80E-01;4.27E-01;5.32E-01;7.49E-01
PDCL	-1.38989	0.777906	4	GAAGGCATCTCAGTTAACAC;GGAGTTTGCCATAATGAATG;GCAGTACCGGAAGCAGCGAA;GACCACGAGGACAAGGACCG	-3.51;-1.69;-0.99;0.64	2100;15321;25393;66403	1.00E+00;8.21E-01;1.02E+00;2.67E-01	11039;52049;62121;75346	4.44E-01;5.36E-01;3.89E-01;4.76E-02
IGFBP7-AS1	-1.25335	0.792695	3	GACGGCACCACCTACCCGAG;GGAATCTCACTCTGTCACCC;GAGGCGGAAGGGTAAAGCCG	-1.68;-1.53;-0.55	15474;17134;35384	4.16E-01;9.42E-01;1.02E+00	42058;60308;61968	4.68E-01;3.95E-01;2.90E-01
COX6B1P5	-0.842425	0.51732	4	CAGGCAAGCCTATTCTAGAA;TCTTCACAGCCTAACCAGCA;CCAGTTATTGAATATGCCAG;AATTGCGATAAAAATACCAG	-2.38;-0.84;-0.31;0.16	9780;28596;41980;55638	4.72E-01;4.87E-01;5.35E-01;5.74E-01	21804;35462;48846;67661	3.79E-01;4.32E-01;4.31E-01;2.35E-01
SRCIN1	-0.0882707	0.641677	4	CATCTGCAGCCGGCTAACGG;GCGCGTGCACATCACGCACG;GCTGCGCTATCTCAACGACG;GCCGGCGGCCTCTACAAGCG	-0.99;-0.46;0.45;0.65	25407;37989;62611;66584	4.00E-01;4.26E-01;3.93E-01;2.62E-01	10858;14831;39454;52035	4.48E-01;8.42E-01;5.86E-01;6.91E-01
TUBG1	-1.64123	1.18788	5	AGATGGTAGTGACAGTCTAG;GACATGATGGTAGACACCTG;CGTGGAGGAGTTCGCCACCG;CAAGGCAGGCAGATCACCTG;TGACTGGTCCGTAGTGAGAG	-4.2;-1.73;-1.23;-0.53;-0.52	304;14934;21235;35879;36310	1.71E+00;7.09E-01;9.64E-01;9.08E-01;1.64E+00	41132;41563;56207;62513;77138	8.92E-01;5.43E-01;5.41E-01;3.88E-01;8.51E-03
C2orf27A	-0.732908	0.615429	7	GGCACCTCCTGTAGAGCCAC;AGAGAAGTCCCTCTCCAGTG;GAGGCCGGTGGCTCTACAGG;GGAGCCCAGATTGCAAACCC;CAGGGGCAGATTCCCCTCCA;CCTGGGCAGTCCCAGGGCAG;TGCCCAGGACCAGCCCAGTG	-3.09;-2.59;-1.69;-0.39;0.28;1.01;1.35	4569;8300;15314;39869;58678;71778;74373	5.42E-01;8.64E-01;9.50E-01;5.52E-01;5.12E-01;4.89E-01;1.23E-01	3069;5664;18764;37573;62128;69150;72873	6.62E-01;1.11E+00;7.85E-01;5.77E-01;5.64E-01;4.20E-01;1.85E-01
CRABP1	-0.444463	0.518436	4	CAGGTGTGAACGCCATGCTG;CTACATCAAGACATCCACCA;CCTGCAGAGTTTAGCCACTT;TCCTGGCGGATCTCCACGTG	-1.43;-0.74;-0.71;1.1	18356;30888;31379;72598	3.76E-01;4.62E-01;8.01E-01;1.12E-01	4844;46063;46554;59086	6.86E-01;4.58E-01;4.60E-01;4.70E-01
CRABP2	-0.415013	0.504654	4	CAACTGGAAAATCATCCGAT;AACCTTGAAGTTAATCTCTG;AGCAGTGGAGATCAAACAGG;GATGCTGAGGAAGATTGCTG	-1.19;-0.69;-0.61;0.82	21949;32006;33996;69397	3.80E-01;4.52E-01;7.22E-01;1.91E-01	8045;43446;45436;55493	5.24E-01;4.39E-01;4.76E-01;5.79E-01
C2orf27B	-0.958816	0.720385	8	GGCACCTCCTGTAGAGCCAC;AGAGAAGTCCCTCTCCAGTG;GAGCAGGGGCCAGAGACACT;GAGGCCGGTGGCTCTACAGG;GGAGCCCAGATTGCAAACCC;CAGGGGCAGATTCCCCTCCA;CCTGGGCAGTCCCAGGGCAG;TGCCCAGGACCAGCCCAGTG	-3.09;-2.59;-2.54;-1.69;-0.39;0.28;1.01;1.35	4569;8300;8659;15314;39869;58678;71778;74373	5.11E-01;7.88E-01;1.36E+00;1.35E+00;6.36E-01;5.07E-01;4.64E-01;1.40E-01	3069;5664;18764;37573;62128;68783;69150;72873	6.22E-01;1.02E+00;7.01E-01;5.65E-01;8.42E-01;7.65E-01;4.12E-01;2.11E-01
C7orf73	0.06523	0.859323	5	GGAATCTCACTCTGTCACCC;CTCTTCAAAGATACCAAACC;TGGATTTACACTGGGCAACG;TTTCAGCTTGGATTTACACT;CAGCTCCACTCACCAGGAAC	-1.53;-0.2;0.34;0.67;1.04	17134;45311;60264;66993;72041	3.91E-01;6.12E-01;6.35E-01;4.23E-01;1.57E-01	5401;10449;17178;32131;60308	5.83E-01;9.29E-01;1.18E+00;1.06E+00;5.43E-01
C7orf72	0.0155686	0.725276	4	AAGGTCACATCATCCCGAAG;AAAATCCACTAGGGTTGGTA;GAGTAAAACACTGTGAGATG;AAACAAGAAATGTAATGCAA	-1.58;-0.23;-0.01;1.88	16515;44321;50694;76231	3.82E-01;4.44E-01;4.12E-01;2.74E-02	1211;26748;33121;60927	1.22E+00;5.13E-01;7.47E-01;4.17E-01
C7orf71	-0.502179	0.463763	4	CCAAGATCAAGGCGTAGGCA;ACAGAGCTTTCTCCGCATGT;ACTCTCGGCCTCATTATGAG;ACTCAGAGACAAGACACATG	-2.35;-0.51;0.05;0.8	9958;36443;52724;69112	4.68E-01;4.29E-01;3.95E-01;1.98E-01	8330;24718;40999;67490	5.15E-01;5.48E-01;5.54E-01;2.39E-01
C7orf77	-0.639262	0.520501	4	CAAGGCTCCTGAAATCACGC;CAGGGCAATATTGGAATCAA;AATCTACTCTTTGACAAACA;AGCAGAAAGGGTTTGTACCA	-1.35;-0.9;-0.77;0.46	19445;27182;30104;63030	3.75E-01;5.07E-01;8.43E-01;3.58E-01	14412;47338;50260;57997	3.96E-01;4.70E-01;4.16E-01;5.02E-01
TUBG2	-0.24496	0.583265	4	CGTGGAGGAATTCGCCACCG;GGTCATTGTTCATGTAGCCG;GGACGAGATGAGCGACGTAG;TGACTGGTCTGTAGTGAGCG	-0.77;-0.39;-0.1;0.28	30069;39785;48009;58833	4.49E-01;4.27E-01;4.41E-01;4.77E-01	18609;29433;37656;47373	3.75E-01;4.77E-01;6.27E-01;8.54E-01
ZNF419	-0.303152	0.644181	5	CAGCATCAGAGAATTCACAC;GAAGTCCTTGCAAAGCAGGG;ACACAGGAGAGAAGTCACAT;CCTTACGGGTGTAGTAACTG;CAGCATCACAAAATCCACAC	-2.92;-0.61;-0.1;0.52;1.59	5816;33959;48035;64175;75449	5.61E-01;4.68E-01;4.63E-01;3.94E-01;5.66E-02	1993;13267;29407;43483;71615	9.36E-01;7.77E-01;6.76E-01;6.62E-01;1.70E-01
ZNF418	-0.197968	0.595631	4	TTGGTGTGGATCAGAAGATG;TCATCTATCTTCATTCAGAG;CACCTTAGGAACCATCAGCG;TGTGAGTCTCCCTTTCAGTG	-1.6;-0.75;0.01;1.55	16300;30530;51535;75286	3.83E-01;4.66E-01;4.04E-01;4.90E-02	2156;25907;46912;61142	9.90E-01;5.27E-01;4.55E-01;4.11E-01
ZNF417	-0.921618	0.647634	9	GGAGAGAGAGCTTATCACTG;CGTGAGCAACTTACCCAGCG;CTTATGAGTGTAGAGAATAT;ACAGACAGCTTATCCCTGTG;ATGAGGCCACACATTTCACA;TCCTGCCTCAGCCTCCCGAG;GATAAGCTGTCTTTCCAGTG;TGAGGCCACACATTTCACAG;GAACGTCCTTCCCAAACTCG	-3.4;-2.74;-1.9;-0.77;-0.56;-0.4;0.28;0.41;0.78	2662;7187;13371;29998;35340;39519;58740;61844;68810	6.31E-01;8.05E-01;8.58E-01;6.11E-01;6.62E-01;7.59E-01;5.18E-01;5.23E-01;4.62E-01	8632;15598;18702;37923;42102;47444;64065;70261;74780	4.09E-01;5.19E-01;6.47E-01;6.01E-01;5.86E-01;5.88E-01;5.45E-01;4.17E-01;1.37E-01
ZNF416	-0.745349	0.464839	4	TCATAGTTAGCAATAGCTTG;GCAGGAACTATACTTGACTG;CAGCTGCAAAGAGTCCACCC;ACCTCAGGTCAGGACTCCAG	-2.94;-0.59;-0.54;1.08	5634;34551;35823;72409	6.34E-01;4.36E-01;6.72E-01;1.17E-01	5033;41619;42891;71806	6.73E-01;4.31E-01;5.18E-01;1.31E-01
ZNF415	-0.201416	0.787213	5	CAGCATCAGAGAATTCACAC;GAACTCTCCAATGACGCGCA;AGAGACCAACGCGATAGAAG;GAACTCTCCGATGTAGTGCA;GTGGTGAAACTGAGGAACCA	-2.92;-0.15;0.11;0.84;1.1	5816;46781;54421;69657;72587	5.61E-01;6.45E-01;5.13E-01;4.83E-01;1.41E-01	4855;7785;23021;30661;71615	6.16E-01;1.13E+00;8.87E-01;1.13E+00;1.70E-01
ZNF414	-0.51423	0.505908	4	CAGCTCCAGTGAGACCGACA;AGGCAGCCACACCGCCAGTG;CATAGTCTCCGGGACCAGCG;TGATGCGGGGTCAACCTCCG	-1.05;-0.74;-0.68;0.4	24376;30850;32302;61620	3.92E-01;4.63E-01;7.72E-01;3.97E-01	15822;45140;46592;53066	3.85E-01;4.50E-01;4.60E-01;6.57E-01
ZNF410	-0.594409	0.534728	4	GTACAGTTGAAGGTTGTGAC;GGGAAGACCTTCTCTCAGAG;TAGCCTCCGAAAACATCTGG;GCTGGGAATTCATAGACACC	-1.11;-1.03;-0.9;0.67	23223;24671;27157;66903	3.85E-01;5.49E-01;9.51E-01;2.54E-01	10539;50285;52771;54219	4.55E-01;5.07E-01;3.94E-01;6.19E-01
GLIPR2	-0.0650186	0.640464	4	GTTTCATAATGAGGTCCTGA;TGAAGGCCCACAATGAGTAC;GATCATAGGATGCCCATGCA;GCTCTGCAAGAACCTCAACC	-1.19;-0.24;0.02;1.15	21803;43963;51906;73022	3.79E-01;4.42E-01;4.01E-01;1.02E-01	4420;25536;33479;55639	7.18E-01;5.33E-01;7.36E-01;5.74E-01
GLIPR1	-0.397978	0.604315	5	CCATAACAAGTTCCGATCAG;AGCCCAAATTGCAAAAGCAT;AGTCTGTGGCCACTACACTC;CAAGGCAGGCAGATCACCTG;TTCGTCATACCAGTTTGTGA	-0.9;-0.68;-0.66;-0.53;0.79	27219;32078;32668;35879;68916	5.07E-01;4.62E-01;6.00E-01;9.08E-01;2.53E-01	8526;41563;44774;45364;50223	4.62E-01;5.43E-01;4.64E-01;6.13E-01;9.40E-01
SSSCA1	-1.2256	0.707881	4	GACGTGGATAAAGATAATCC;ACAGCGGAAAATCTACTGCG;ATGGGCGACTATCTGCTGCG;ACCTCGTCCGGAGCACTGTG	-3.09;-1.0;-0.84;0.03	4603;25318;28547;51963	7.04E-01;5.37E-01;8.98E-01;6.93E-01	25479;48895;52124;72839	4.01E-01;4.88E-01;3.99E-01;1.06E-01
POU4F1	-0.0798932	0.630368	4	ACGGCACGCTGTTCATCGTG;GTCCATCTGCGACTCGGACA;GATGTGGTCCAGCAGATCGC;CACCCGCATATGCACAGCCT	-0.87;-0.4;0.18;0.77	28041;39448;56170;68614	4.25E-01;4.26E-01;3.78E-01;2.10E-01	8828;21272;37994;49401	4.99E-01;6.23E-01;6.19E-01;7.81E-01
POU4F2	-1.84841	1.10808	4	TTGGTGCATGGGGTTCATGG;TTGCAGAGCAATATATTCGG;AGCAGCTCGAGCAACGCTGG;GAATACCATCCCGTGCACGT	-3.63;-3.07;-1.44;0.75	1592;4720;18274;68330	1.11E+00;1.71E+00;1.40E+00;2.17E-01	9112;59168;72724;75850	4.90E-01;7.10E-01;6.95E-01;3.61E-02
POU4F3	0.0718196	0.901145	4	TGCTCCACTACGTACCTGCG;GGTCTGACTCCACGTCGCTG;CAGATCCATCCACACCACCT;CACGCTGCTCATGGTATGGT	-0.07;-0.04;0.06;0.33	49019;49810;53027;59938	9.03E-01;5.00E-01;3.93E-01;4.45E-01	17504;24415;27632;28423	3.78E-01;5.53E-01;9.32E-01;1.74E+00
FBF1	-0.600608	0.548085	5	AGACGGAAGTGACTTCTTGG;AGCTCATCGAGAGTGCACAC;TCCTGCCTCAGCCTCCCGAG;AGACATGCGCAGAGACCACG;AGTAGGTTCTTCGCAGACAG	-1.78;-0.71;-0.4;-0.26;0.14	14507;31358;39519;43621;55190	3.89E-01;4.62E-01;4.97E-01;6.58E-01;7.36E-01	22252;33821;37923;46084;62941	4.31E-01;4.67E-01;5.15E-01;5.95E-01;4.50E-01
RASA4	-1.36723	1.16078	8	TGTAGCGCACTCGGACGAAG;GGAGCTGAGTCGCACCAGTG;GATTGATGTCCAGAGACTGC;TGACATAGAAAGCCACAGCG;GGACACGGGAGACCTCGGTG;GACGGAGGTCGACCCCGATG;CAAGGCAGGCAGATCACCTG;CCGACCAGTCCAAGAGCCGG	-2.8;-2.79;-1.96;-1.09;-0.84;-0.54;-0.53;-0.37	6722;6776;12839;23501;28507;35780;35879;40254	4.34E-01;9.07E-01;9.87E-01;8.55E-01;1.02E+00;1.10E+00;1.71E+00;2.27E+00	37188;41563;41662;48935;53941;64603;70659;70720	1.40E+00;1.10E+00;7.36E-01;6.88E-01;5.91E-01;5.86E-01;4.33E-01;3.15E-01
RASA1	-0.658742	0.465408	4	AATTTAAGAACAGATGAACA;ATCGCCAGGAGTATTATCTG;ATTTACGGAAAAGTAGTCCA;GGATGGACCAGAATACGAGG	-3.05;-0.29;0.21;0.49	4925;42644;57058;63544	6.80E-01;4.35E-01;3.76E-01;3.44E-01	13898;20384;34798;72517	4.02E-01;6.47E-01;6.99E-01;1.14E-01
RASA2	-0.502709	0.520794	6	GAGAATCGCTTGAATCCGGG;TTAGCATCAAGGCATGCCAT;AGATATCACACATTACAGTG;CAAGGCAGGCAGATCACCTG;GTGCAGCAGCAGTCGTACAA;AGGATCGACTTGTGGAACAA	-1.64;-0.93;-0.77;-0.53;0.21;0.65	15856;26621;30062;35879;56985;66570	4.08E-01;4.83E-01;5.72E-01;7.01E-01;4.66E-01;3.94E-01	10872;20457;41563;47380;50821;61585	4.03E-01;5.13E-01;5.12E-01;4.99E-01;6.00E-01;5.97E-01
RASA3	-1.17274	0.69664	4	ATCATCTTACCACGCCTCGT;TAAAACACTTCATCGAACTG;GCTCTTCCTACACTATGGCA;CTGACTATTACAGCCCTCTG	-2.14;-2.08;-0.46;-0.01	11448;11939;37849;50678	4.37E-01;9.91E-01;6.22E-01;7.37E-01	26764;39593;65503;65994	4.12E-01;4.26E-01;4.28E-01;2.78E-01
ACTN3	-1.04971	0.620573	4	CCATGGCTGGAGAACCGTGT;CAGTGAGCTGGACTACCACG;GTCCAGGGCCTTGTTAACGT;TGCAACTGGAGTTTGCCCGG	-2.86;-0.93;-0.29;-0.11	6300;26609;42510;47650	5.98E-01;5.15E-01;5.25E-01;8.44E-01	29792;34932;50833;71142	4.46E-01;4.34E-01;4.10E-01;1.47E-01
ACTN2	-0.950203	0.627267	4	AGGACTTCCGGGATTACCGC;CGAGTCGGCGTCGCTGACAG;TGATGGTCCAGATCATACCC;CCAGGTTAATATTTCCTATG	-3.3;-2.29;-0.37;2.16	3236;10382;40341;76683	8.32E-01;1.09E+00;5.67E-01;1.71E-02	759;37101;67051;74206	1.42E+00;4.27E-01;4.58E-01;7.41E-02
ACTN1	-0.0319661	0.874523	6	GCCGAGGCGGGCAGATCACG;GGCCCTAACTCAGAAGCGAA;CAGGACATCAACAATGCCTG;GCAGGGCCTTGATCTCCGAG;AAAGGGAAAACAGGCCGAAG;GGATCCGCCGCACAATCCCG	-1.31;-1.13;0.24;0.51;0.67;0.81	20055;22910;57821;64032;67034;69323	4.59E-01;4.91E-01;8.68E-01;6.77E-01;4.07E-01;2.89E-01	8119;10408;13410;19621;54532;57387	4.42E-01;8.18E-01;1.23E+00;1.46E+00;5.12E-01;7.81E-01
ACTN4	-1.37115	0.856733	4	TGGGCGGCTTGTGCACACGC;ACTCCCACAATGTCAACACC;ACAGATCGAGAACATTGATG;GTTCATCGTCCATACCATCG	-3.64;-0.98;-0.5;-0.36	1553;25717;36722;40510	1.12E+00;5.30E-01;6.49E-01;1.13E+00	36932;40720;51725;75885	5.64E-01;4.28E-01;4.03E-01;3.53E-02
EZR	-1.15104	0.800008	4	TGCGGCGCATATACAACTCA;GGCAGTAGATCTCATCGCTA;CAAACTTACCAGGGACCAGT;CTTTATTATCCACATAGTGG	-1.81;-1.7;-0.63;-0.45	14166;15201;33268;38089	3.99E-01;8.26E-01;7.43E-01;1.23E+00	39353;44174;62241;63276	6.16E-01;4.43E-01;3.90E-01;3.51E-01
PRR29-AS1	-0.752555	0.40507	1	GAGTCTCACCTTCCTTCACG	-0.75	30472	0.405	46970	0.217
LOC107985365	-1.88236	0.859029	2	CACCTGAACCTGGGAGACAG;CAAGGCAGGCAGATCACCTG	-3.23;-0.53	3622;35879	1.05E+00;6.68E-01	41563;73814	3.03E-01;4.17E-02
N6AMT1	-0.521884	0.540674	5	ACGCCGTTCCACGGGCACGT;GGTGGAGTCACTACATAGGG;CAAGGCAGGCAGATCACCTG;ACTTACATGTACAAAGCCTG;CAGCGACGTGTACGAGCCCG	-1.41;-0.74;-0.53;0.0;0.07	18629;30866;35879;51310;53250	3.98E-01;4.61E-01;5.43E-01;4.88E-01;8.13E-01	24192;26132;41563;46576;58813	4.57E-01;4.80E-01;4.79E-01;5.84E-01;5.98E-01
OR5J2	-0.651857	0.521454	4	TTGTTGCCTTCACAACCAGG;TTTACGCCATTACCTTGTTG;CATGTCTGATAGAAAGTGTG;AGGCTTCTTACTGTCAGTGA	-1.25;-1.14;-0.59;0.38	20817;22652;34398;61197	3.76E-01;5.90E-01;7.10E-01;4.09E-01	16245;43044;54790;56625	3.83E-01;4.37E-01;3.83E-01;5.44E-01
LOC105375773	-1.52854	0.655112	1	GGAATCTCACTCTGTCACCC	-1.53	17134	0.655	60308	0.109
LOC105375779	-1.30793	0.586748	1	GCCGAGGCGGGCAGATCACG	-1.31	20055	0.587	57387	0.13
LOC107985367	-0.535163	0.33453	1	GGAACTTTGATTGTGATACG	-0.54	35846	0.335	41596	0.27
RPS10P26	-1.74314	0.89927	2	TGGACGGCTACGGCGTAGGG;GTGGCAGGCACAATCTCCGG	-2.13;-1.35	11551;19384	5.95E-01;1.20E+00	58058;65893	4.26E-01;1.40E-01
ABLIM1	-1.28924	1.27782	12	GGTGACTTCACACGCCATAA;CCAGGGTTTATGTGTCAGGG;GAATTGTCCACAGTCAGCAA;TCTTTCGGACTGGACGACAT;CCACCCTGACACATAAACCC;TTCACACGCCATAATGGCAC;GCCGAGGCGGGCAGATCACG;TCTAACTCCAACTTACGCTC;AATGCTGGACCCAACACAAA;CAAGGCAGGCAGATCACCTG;TGTTACATACACGCCCACGT;TAAGCAATCTACGAAGACCG	-3.32;-2.44;-1.91;-1.73;-1.64;-1.46;-1.31;-0.8;-0.54;-0.53;0.04;0.18	3128;9312;13305;14937;15860;17949;20055;29412;35807;35879;52227;56069	5.11E-01;5.77E-01;6.89E-01;9.09E-01;1.24E+00;1.53E+00;1.86E+00;1.50E+00;1.48E+00;2.06E+00;1.29E+00;1.68E+00	21373;25214;41563;41635;48030;57387;59490;61581;62505;64125;68121;74314	1.02E+00;8.66E-01;1.48E+00;1.06E+00;1.08E+00;1.34E+00;1.08E+00;8.56E-01;6.39E-01;5.29E-01;4.53E-01;2.15E-01
LOC105371064	-1.30793	0.586748	1	GCCGAGGCGGGCAGATCACG	-1.31	20055	0.587	57387	0.13
ABLIM3	0.0895641	0.84374	4	GGAAGTGGTTGTTGTGCACG;CAAGGTTAAGTCTATCTACG;AGGTCACCTTGTCTCCAATG;TGGGGGAGTCTATGTACCCC	-0.29;-0.07;0.27;0.44	42640;49049;58539;62536	6.99E-01;4.90E-01;3.75E-01;3.71E-01	14906;18903;28393;34802	3.92E-01;6.90E-01;9.04E-01;1.39E+00
ABLIM2	-0.497829	0.530906	6	GCTGTGAGAAATACATCACG;CTTACATAAATCACACGGCT;CAAGGCAGGCAGATCACCTG;TCCTGCCTCAGCCTCCCGAG;AGGTCGGAGTGTAGCGCCCG;GTGAGTAGGAGATCATGTCG	-2.28;-0.62;-0.53;-0.4;0.15;0.7	10452;33593;35879;39519;55434;67491	4.06E-01;5.37E-01;5.12E-01;6.13E-01;4.94E-01;3.58E-01	9951;22008;37923;41563;43849;66990	4.12E-01;4.97E-01;5.06E-01;5.73E-01;8.20E-01;3.78E-01
LOC105371069	-1.30793	0.586748	1	GCCGAGGCGGGCAGATCACG	-1.31	20055	0.587	57387	0.13
FAM172A	-1.08533	0.852046	10	AGTTAAGACACATAAAAACT;AAGATACGAGGCTCTAGGAG;GAGAATCGCTTGAATCCGGG;AGCTAAGCGTCGCCAACATG;TAAGTATGTACCTTTCAGTG;TCCCACAGCGATCCCCACAT;CGGGGCCCTACATTGCCCTG;TCATGGTAGTGGTGTTGTCA;AGAGTTGCAGCAATTGGCCA;TTCAACCTTAAGACCACTGG	-3.19;-2.46;-1.64;-1.54;-1.43;-0.67;-0.6;-0.12;0.15;0.66	3925;9171;15856;16997;18403;32432;34228;47382;55300;66718	4.98E-01;6.38E-01;6.84E-01;9.58E-01;1.31E+00;8.88E-01;1.16E+00;8.76E-01;8.60E-01;6.47E-01	10724;22142;30060;43214;45010;59039;60445;61585;68278;73517	4.41E-01;6.04E-01;6.47E-01;8.19E-01;6.67E-01;8.81E-01;6.50E-01;5.20E-01;4.19E-01;2.26E-01
LINC00630	-1.52854	0.655112	1	GGAATCTCACTCTGTCACCC	-1.53	17134	0.655	60308	0.109
NO_CURRENT_178	-0.497194	0.520154	4	GGTGCGGTCTGCTTGTAGAT;GGTGTCACCACCGCTTACCA;GGTGCTTAGCTCTGCGCACA;GGTTAACATCGCCACTCTGA	-1.13;-0.49;-0.4;0.04	22903;36913;39454;52266	3.84E-01;4.28E-01;5.86E-01;6.83E-01	25176;37988;40529;54539	3.98E-01;4.26E-01;5.63E-01;6.09E-01
RPS10P22	-1.35321	0.601528	1	GTGGCAGGCACAATCTCCGG	-1.35	19384	0.602	58058	0.125
LINC00639	-0.533336	0.334131	1	CAAGGCAGGCAGATCACCTG	-0.53	35879	0.334	41563	0.27
BIVM-ERCC5	-0.959273	0.794861	12	GACTCAATATCTATCGCTTG;AACATTCAGGACACATCCGA;AAAATCGAAGGCAGGCCCGT;GGAACCAATGGAAATTGACT;TTAATGGCTGAAAGAGTCCG;GGGCAAGCTACCTCTCGCAT;AAGTATTAGACCTCAGACGA;TTAGGTTTGGTCCTTTCACG;ATAATTTCCGATGTACTAGT;ACGTAGCCAGCACTAATGAG;AAATGTCACTTGTTCACGTG;TTATCAATTTCCCATGCGAG	-3.76;-3.53;-1.61;-1.18;-1.08;-0.91;-0.67;-0.31;-0.18;0.4;0.47;0.85	1156;2004;16165;21963;23817;27149;32428;42035;45738;61555;63204;69803	8.19E-01;1.47E+00;6.14E-01;6.53E-01;7.79E-01;8.90E-01;9.26E-01;7.88E-01;8.79E-01;5.53E-01;6.27E-01;5.41E-01	7639;14238;15887;31704;35407;45014;50293;53625;55479;61277;75438;76286	4.23E-01;5.34E-01;6.19E-01;6.86E-01;6.58E-01;7.16E-01;6.90E-01;6.31E-01;6.03E-01;5.58E-01;6.33E-01;7.83E-02
TSPOAP1-AS1	-2.16512	1.39708	4	AGGACAGCTGGGTCTCCAAG;TGAAGCGGCTTACCCATCAA;GATGCATATCTACAAATGAA;AGACGGTGCCGAAGGACCTG	-2.92;-2.86;-2.29;-0.59	5822;6227;10380;34558	6.24E-01;1.48E+00;2.08E+00;1.40E+00	42889;67048;71213;71622	7.06E-01;1.09E+00;6.02E-01;1.36E-01
RAB6A	-0.903814	0.517273	4	GTGTTCCTGGGGGAGCAAAG;GGGACACAGCAGGTCAAGAG;ATAAACAACAACTGCCACAG;GATCTTGCTGACAAGAGGTA	-2.79;-1.55;0.27;0.45	6840;16921;58350;62772	5.72E-01;7.57E-01;3.75E-01;3.65E-01	14670;19092;60521;70602	3.94E-01;6.84E-01;3.80E-01;1.61E-01
RAB6B	-0.461476	0.733798	5	TCGACAACACATACCAGGTG;CAAGGCAGGCAGATCACCTG;TCGACGACGTCAGGACAGAG;GATATTAGGTGCTCACCGTG;TCCACTGAGAAAATTCAAGT	-0.63;-0.53;-0.49;-0.43;-0.23	33498;35879;37090;38638;44435	6.49E-01;4.79E-01;5.25E-01;8.09E-01;1.21E+00	33007;38804;40352;41563;43944	6.36E-01;5.06E-01;4.89E-01;7.16E-01;1.23E+00
RAB6C	-1.20438	0.799779	6	CAAGAGGCAAGTGTCAGTTG;ACTTGGAGGATGGAACAATC;ATTGAAACTAGGGCAAAAGC;TGTACCTGGGAATGAGGCTA;GCAGAATCACGGATGTACCT;GATGTTATCATCACGCTAGT	-3.28;-2.31;-0.74;-0.71;-0.71;0.53	3316;10231;30691;31522;31547;64304	6.85E-01;8.28E-01;5.62E-01;8.39E-01;1.40E+00;4.84E-01	13138;45895;45920;46751;67211;74126	3.96E-01;8.38E-01;5.51E-01;5.05E-01;4.09E-01;1.14E-01
LOC102724181	-1.03094	0.565474	2	GGAATCTCACTCTGTCACCC;CAAGGCAGGCAGATCACCTG	-1.53;-0.53	17134;35879	4.63E-01;6.68E-01	41563;60308	3.03E-01;2.17E-01
DLGAP4-AS1	0.690271	1.39458	5	CAAGGCAGGCAGATCACCTG;ACATTGGATGTGGCCCGCTG;CCTTGTCAATGAAGCCATCA;CCCCACAGACGAATACCTGG;CGTTGCGAATCACATCCTCG	-0.53;-0.45;0.68;1.06;2.69	35879;38147;67152;72259;77082	7.16E-01;4.99E-01;9.39E-01;5.96E-01;1.01E-02	360;5183;10290;39295;41563	1.64E+00;1.44E+00;1.75E+00;7.87E-01;1.35E+00
UBE2Q2P11	-1.66848	0.802776	2	GAAAACGGACTCGTTGATGG;TGGAAAGGCGCATTGTACCC	-2.37;-0.97	9823;25912	6.55E-01;9.51E-01	51530;67623	3.51E-01;1.18E-01
DAOA	-0.850988	0.540443	4	TAACCAATGGAACATGGGAA;TGAGGAAGGTAAGAGACCCA;AAGGTGATGACACTTGACTC;AGGTTACCTTTCACAAGACC	-2.9;-0.47;-0.06;0.02	5985;37495;49259;51939	6.15E-01;4.27E-01;4.26E-01;6.94E-01	25503;28183;39947;71457	4.01E-01;4.93E-01;5.75E-01;1.40E-01
UBE2Q2P12	-1.66848	0.802776	2	GAAAACGGACTCGTTGATGG;TGGAAAGGCGCATTGTACCC	-2.37;-0.97	9823;25912	6.55E-01;9.51E-01	51530;67623	3.51E-01;1.18E-01
ERVV-1	-0.33114	0.646616	8	GAAAAGAGCTAATCACATGG;ATAGGAATGATCGCCCCATG;GACACCAGTGAGTCAAGTTA;CAAGGCAGGCAGATCACCTG;CATAAAAATACATAGCCAGG;AAGGAAAAGAGCTAATCACA;AATAGTTTGATTGCATGCAG;AACTTATTCAACCCCCCCTG	-1.29;-1.13;-0.74;-0.53;-0.26;0.17;0.25;0.9	20273;22896;30675;35879;43381;55886;57899;70420	6.02E-01;5.25E-01;5.54E-01;5.73E-01;5.80E-01;5.14E-01;5.79E-01;3.30E-01	7022;19543;21556;34062;41563;46767;54546;57169	4.28E-01;5.07E-01;6.26E-01;5.88E-01;6.06E-01;6.71E-01;6.92E-01;1.05E+00
ERVV-2	-0.543709	0.646384	8	GCCGAGGCGGGCAGATCACG;GAAAAGAGCTAATCACATGG;ATAGGAATGATCGCCCCATG;GACACCAGTGAGTCAAGTTA;CATAAAAATACATAGCCAGG;AACCTATTCAACCCCCCCTG;AAGGAAAAGAGCTAATCACA;AATAGTTTGATTGCATGCAG	-1.31;-1.29;-1.13;-0.74;-0.26;-0.03;0.17;0.25	20055;20273;22896;30675;43381;50032;55886;57899	5.95E-01;5.08E-01;6.01E-01;6.40E-01;5.80E-01;5.93E-01;6.44E-01;1.01E+00	19543;21556;27410;34062;46767;54546;57169;57387	5.79E-01;5.14E-01;5.54E-01;5.88E-01;5.54E-01;5.25E-01;6.02E-01;1.04E+00
LOC105374425	-1.5787	1.03199	4	CCTACGAGTCCTGTATGGCT;GAGAATCGCTTGAATCCGGG;GGAATCTCACTCTGTCACCC;CAAGGCAGGCAGATCACCTG	-2.61;-1.64;-1.53;-0.53	8137;15856;17134;35879	5.21E-01;7.98E-01;1.47E+00;1.34E+00	41563;60308;61585;69305	6.71E-01;7.49E-01;3.85E-01;1.93E-01
GDI2	-1.05869	0.741984	5	TAAGATGCTGCTTTATACAG;GATCGAAACCCTTACTACGG;GATCACCACCCGAGTCAATG;CAAGGCAGGCAGATCACCTG;TCTTACCTTGCAAATCCTTG	-2.1;-1.88;-0.7;-0.53;-0.08	11803;13576;31826;35879;48526	4.05E-01;7.64E-01;6.18E-01;9.08E-01;1.02E+00	28916;41563;45616;63866;65639	5.41E-01;5.43E-01;4.62E-01;3.92E-01;3.59E-01
GDI1	-0.752603	0.549956	4	GCCTCGGCCCATCGACTCAG;CAACGCCCTCAAAGGTCTTG;ATATATGCTGAACAAACCTG;CTTCCCCTCACTCATCAGTG	-2.37;-0.32;-0.26;-0.06	9847;41764;43532;49127	4.71E-01;4.31E-01;5.07E-01;7.91E-01	28315;33910;35678;67595	4.28E-01;4.39E-01;6.76E-01;2.36E-01
TTC30A	-1.14852	0.628486	4	GCGAACATCAAAGCCCTCGG;AGCTGTCTGGCAAGTGATCA;CAAGGCCTGCCTTTATCCGG;GGAGGCGACAATGAGACCGA	-2.6;-2.01;-0.13;0.15	8267;12460;47098;55350	5.17E-01;9.61E-01;4.53E-01;5.83E-01	22092;30344;64982;69175	3.80E-01;4.68E-01;4.20E-01;1.96E-01
SPG21	-0.65257	0.439626	4	TAATACTTACAGCGATAACC;AGGATTAGGGAATGGACTCT;AGAGGACACCTGATACTTCG;TGGCCCGGTGGACCCTATGA	-2.61;-0.89;-0.24;1.13	8159;27534;43981;72836	5.20E-01;5.02E-01;4.99E-01;1.07E-01	4606;33461;49908;69280	7.03E-01;4.42E-01;4.19E-01;1.93E-01
TFAP4	-0.71937	0.58365	4	CGCATGCAGAGCATCAACGC;CACTAACCCCCGAGACTCAG;ACAGCTCAAGCGCTTCATCC;AGGCTCCCCGGACATCTGGG	-1.52;-0.71;-0.57;-0.08	17217;31532;35078;48641	3.79E-01;4.56E-01;6.92E-01;8.08E-01	28801;42364;45910;60225	4.33E-01;4.34E-01;4.69E-01;4.37E-01
SPDL1	-1.49162	0.837477	4	TTCTTACTATAATGCCCTAG;TTTGTAGGTGGAAGATCGAA;AGAGTACCAGAGTCGACTGA;GTTCCTCTGATTTACAAGAG	-3.08;-2.02;-1.41;0.55	4646;12428;18606;64737	7.00E-01;9.63E-01;1.38E+00;3.11E-01	12705;58836;65016;72801	4.16E-01;6.99E-01;4.20E-01;1.07E-01
LOC728825	-0.693909	0.385684	1	ATATTAATTTGAAGGTGGCG	-0.69	31863	0.386	45579	0.23
LOC107984548	-1.40634	0.616874	1	TCGCCCAAGCTAGAGTGCAG	-1.41	18711	0.617	58730	0.12
NAPEPLD	-0.916963	0.626622	5	GAAGCACGAGAGCTAAAGAT;AAGTGACCTTATCATGTCCG;TCCTGCCTCAGCCTCCCGAG;TAAGGACCGCATCTATTGGA;ATGGGAGATTTGTGAATCCG	-3.17;-0.77;-0.4;-0.4;0.16	4046;29976;39519;39521;55628	6.76E-01;4.62E-01;4.97E-01;7.80E-01;7.18E-01	21814;37921;37923;47466;73396	4.26E-01;4.97E-01;5.15E-01;5.64E-01;1.16E-01
SPTA1	-1.11234	0.583814	4	TCGGCTAAGGGATATCAACA;CTGACCTGTCTAGTACACGT;CCCTTGGACATACCCCGTCA;AGTGTGCTGACATCTTAGAG	-3.13;-1.58;-0.22;0.49	4277;16487;44653;63548	7.30E-01;7.73E-01;4.89E-01;3.43E-01	13894;32789;60955;73164	4.02E-01;4.47E-01;3.82E-01;9.87E-02
HGSNAT	-0.132861	0.633803	4	TTTCCAGTAGACGGTCAAGT;ACCAGGATGAGCAGCCACTG;AGCAGGACAGACCCTCTCGA;ATGACTTCTATACTGCAACG	-0.92;-0.26;0.28;0.38	26792;43420;58692;61056	4.12E-01;4.39E-01;3.75E-01;4.13E-01	16386;18750;34022;50650	3.82E-01;6.95E-01;7.21E-01;7.38E-01
CRYZL1	-0.424273	0.567126	5	AGAGTACATGAGCATTACTT;TCTGAGCCAGATAAATACAA;CAAGGCAGGCAGATCACCTG;TAATATTACCCACCTATGGG;AGCTGTTTGGAAGAAACAGG	-1.01;-0.65;-0.53;-0.37;0.44	24964;32967;35879;40419;62552	4.69E-01;4.64E-01;5.43E-01;7.51E-01;4.64E-01	14890;37023;41563;44475;52478	3.88E-01;4.88E-01;4.79E-01;6.35E-01;8.45E-01
SERF2	-0.951736	0.628627	4	CAGCAGAAAGCCCGTCATCT;TCTGGCGGGCGAGCTCACGC;GGGCTACCTCTGCTTGCGGG;TATGAAAAAGCAGAGCGACT	-2.79;-2.56;0.76;0.78	6787;8523;68507;68848	5.75E-01;1.24E+00;4.96E-01;2.04E-01	8594;8935;68919;70655	5.06E-01;1.20E+00;5.08E-01;1.59E-01
OR4L1	-0.06643	0.711543	4	CCCACACAGAGATGGTCTTG;TGAGCCACAAGCTGCTAAAG;ATATGTTGTTTATGACATTG;TTGCATTGAAACATACACCC	-0.47;-0.35;0.23;0.32	37553;41006;57554;59683	5.77E-01;4.29E-01;3.75E-01;4.52E-01	17759;19888;36436;39889	3.77E-01;6.60E-01;6.56E-01;1.15E+00
NAT8	-1.61161	0.96348	4	CCTTGCCAAAAAACCCTGGA;CCAGGAGAGCGACCGCCAGT;AAATCCTACCTGAGTGAGCG;CAGCTTCAGCAATTGCCGGA	-2.93;-2.93;-1.63;1.04	5716;5750;16008;72096	6.30E-01;1.55E+00;1.55E+00;1.24E-01	5346;61434;71682;71726	6.52E-01;7.92E-01;6.27E-01;1.33E-01
IGFL2	0.034907	0.966159	9	GCCGAGGCGGGCAGATCACG;CTCCTGTTGGCTCAGGACTG;TTAAAGGAGACCCGCCGCTG;TGTAACAGCACTGCTCCAAG;CAGTGTTCAAAAGGAACTAC;TTGTGTCCAAGGGAAGTCAT;CTGACACATAAGCAGGAGCT;TTGTTCCCACACCTGGGTGT;CTGAGCGAGACCCGCCAATG	-1.31;-1.14;-0.45;-0.31;-0.28;0.41;0.64;1.16;1.6	20055;22674;38048;42215;42856;61714;66399;73109;75470	6.74E-01;5.64E-01;7.63E-01;6.64E-01;5.85E-01;7.44E-01;6.03E-01;4.98E-01;1.01E-01	1972;4333;11043;15728;34586;35227;39394;54768;57387	7.29E-01;1.12E+00;1.01E+00;1.16E+00;6.78E-01;9.19E-01;1.12E+00;7.83E-01;1.17E+00
NAT2	-0.246304	0.655803	4	TGTGGTCTGAAAACCGATTG;ATTGTAAGAAGAAACCGGGG;TAGAGGCTGCCACATCTGGG;TAACAAATACAGCACTGGCA	-0.51;-0.33;-0.2;0.05	36479;41553;45318;52700	5.55E-01;4.31E-01;4.78E-01;6.69E-01	24742;32124;35889;40963	3.95E-01;4.52E-01;6.70E-01;1.11E+00
NAT1	-1.08729	0.821821	4	CGGAAGACACAAGGCACCTG;TTGGACGCTCATACCAGATG;GAACCTTAACATCCATTGTG;GTTGTGAGAAGAAATCGGGG	-1.64;-1.3;-0.9;-0.5	15865;20157;27162;36668	3.85E-01;6.53E-01;9.51E-01;1.30E+00	40774;50281;57285;61577	6.51E-01;5.07E-01;3.75E-01;3.98E-01
NAT6	0.309318	0.953566	4	AGGGTAAGCTCAGTTGGACC;TGAGGTCAGCACAAGCATCC;CTACACTAGACCCTACACAC;GCGGGCATGGCCCACCACAA	-0.67;-0.14;0.8;1.24	32453;47055;69120;73712	4.83E-01;4.67E-01;5.15E-01;8.57E-02	3730;8322;30387;44989	7.80E-01;1.26E+00;8.33E-01;9.43E-01
LOC107986597	0.749231	0.92755	1	GCTCCCGGTCAGCCTGTCCG	0.75	68292	0.0546	9150	0.928
LOC100996316	-2.41352	1.20361	2	CATTCAGCCTAGCACTGAAG;GGAATCTCACTCTGTCACCC	-3.3;-1.53	3232;17134	1.10E+00;1.31E+00	60308;74213	4.63E-01;3.70E-02
ADGRL4	-0.411139	0.568077	5	AATGTGTCAGGTGATTACAG;TCGCCCAAGCTAGAGTGCAG;TGAATTTGTATCAAACTCTG;TGAAGCCTGCTATTGCAACA;ATTTACATTAAGTCATCGAA	-1.78;-1.41;-0.59;0.68;1.05	14495;18711;34347;67102;72103	3.89E-01;5.94E-01;5.68E-01;4.24E-01;1.55E-01	5339;10340;43095;58730;62947	5.87E-01;9.36E-01;4.70E-01;3.98E-01;4.50E-01
LOC107986594	-0.399969	0.310068	1	TCCTGCCTCAGCCTCCCGAG	-0.4	39519	0.292	37923	0.31
ADGRL2	-1.02809	0.871945	9	TCTTTAACAAAGAAAGAACG;AGCTGGACGGAGTTATAACA;GGAATCTCACTCTGTCACCC;TCGCCCAAGCTAGAGTGCAG;GCCGAGGCGGGCAGATCACG;CAAGGCAGGCAGATCACCTG;GTGGCCCAAGTGTTTGAACG;CTCTTCGATTTGAAGCAACG;GAGCGCTAACTATGGTCGGA	-2.29;-2.27;-1.53;-1.41;-1.31;-0.53;-0.32;0.19;0.21	10391;10560;17134;18711;20055;35879;41720;56559;56967	4.19E-01;6.20E-01;6.93E-01;9.68E-01;1.35E+00;8.91E-01;9.96E-01;7.07E-01;1.20E+00	20475;20883;35722;41563;57387;58730;60308;66880;67065	6.90E-01;5.37E-01;6.96E-01;6.51E-01;8.98E-01;6.47E-01;5.14E-01;4.20E-01;5.62E-01
ADGRL3	-0.839778	0.759346	7	AGGCAAATCTGACATAGACC;GAGAATCGCTTGAATCCGGG;AGGCATCTGGCAGATAACAT;CAAGGCAGGCAGATCACCTG;CAAAGTTGTGGTCCGAAGGG;TCCTGCCTCAGCCTCCCGAG;ACAGGTTATTGGTCAACACA	-1.79;-1.64;-1.23;-0.53;-0.4;-0.4;0.12	14351;15856;21234;35879;39399;39519;54659	4.21E-01;5.53E-01;6.98E-01;6.03E-01;7.63E-01;1.22E+00;1.06E+00	22783;37923;38043;41563;56208;61585;63091	5.94E-01;7.59E-01;5.56E-01;5.39E-01;4.98E-01;4.41E-01;6.23E-01
ADGRL1	0.0607537	0.834117	5	TCGCCCAAGCTAGAGTGCAG;ACGGACGCGCATCAAGAGCG;CCTTCAAGATCATGTCACAG;AGCCGGCAAGAACTACAACA;TGTTGAAGGCATAGTCCACG	-1.41;-0.89;0.16;0.92;1.52	18711;27584;55512;70645;75196	3.98E-01;4.70E-01;5.30E-01;5.17E-01;6.39E-02	2246;6797;21930;49858;58730	8.90E-01;1.23E+00;9.33E-01;5.14E-01;6.01E-01
LOC100996318	-0.753208	0.462982	4	TCCAGCAGAGTCTTCATGGA;GCTTTCCCATGCCTGAGCAA;ATGGGCAGCAAGACCCTGCG;TGTGACATCCCCACTCCTGG	-3.09;-1.19;-0.17;1.43	4593;21893;46135;74783	7.04E-01;6.08E-01;4.66E-01;6.07E-02	2659;31307;55549;72843	9.08E-01;4.58E-01;3.79E-01;1.06E-01
FAIM2	-0.0883909	0.629482	4	CCTGGACATAGTCCTTGACA;GGTGACTGAGAGGCAGACAA;CCCAGGATCACTTACAAAGA;TATGACAACGGTTTCCCCAC	-1.07;-0.44;-0.13;1.29	23853;38547;47235;74017	3.89E-01;4.26E-01;4.51E-01;7.86E-02	3425;30207;38895;53589	8.11E-01;4.69E-01;5.98E-01;6.40E-01
LOC105377818	-0.533336	0.334131	1	CAAGGCAGGCAGATCACCTG	-0.53	35879	0.334	41563	0.27
LOC105372860	-0.204813	0.49017	2	TCTTCTGTCAGTCGATCACG;GCGCGCCGGTCGCCCAGACA	-1.17;0.76	22280;68402	3.87E-01;1.08E-01	9040;55162	6.86E-01;2.95E-01
COX5A	-0.428182	0.512206	4	CAGGGGCCTTACCCACGGCG;ACCACCCGGGCCGACCCTCG;GATGCCTGGGAATTGCGTAA;TGAGGAGTTTGATGCTCGCT	-1.51;-1.23;0.39;0.63	17405;21257;61349;66193	3.78E-01;6.23E-01;3.84E-01;2.73E-01	11249;16093;56185;60037	4.40E-01;7.89E-01;3.77E-01;4.42E-01
COX5B	-0.244443	0.559701	4	TCAGGACCCATACAATGTAC;GACTAAATTAGGGTCTTCCC;GCATCGCGGCCGCGCCACTG;ATGCGCTCCATGGCATCTGG	-1.75;-0.32;0.09;1.0	14807;41768;53746;71671	3.93E-01;4.31E-01;3.88E-01;1.35E-01	5771;23696;35674;62635	6.27E-01;5.68E-01;6.76E-01;3.69E-01
TMEM258	-0.883137	0.544102	5	TGGGCTGGTATATCTGCTCA;AGGATACACGAAGAACCAGG;CAAGGCAGGCAGATCACCTG;AAAGCACCACGGTCAGATGG;AACTGCTGTGCCCAGTTACG	-3.3;-1.18;-0.53;-0.28;0.89	3187;22036;35879;42830;70291	7.60E-01;5.28E-01;5.43E-01;6.80E-01;2.10E-01	7151;34612;41563;55406;74252	5.04E-01;4.71E-01;4.79E-01;4.29E-01;9.13E-02
TMEM257	-1.09562	0.752889	4	AAAAATCCTAAAATAAAATA;GAAATAGCAATATCCAGCTG;ATGATTGCATTAGAAAATAA;CAAAACAGAATATAGTCAGT	-1.7;-1.53;-1.17;0.02	15225;17155;22123;51846	3.90E-01;7.49E-01;1.18E+00;6.97E-01	25596;55319;60286;62217	4.02E-01;6.02E-01;3.79E-01;3.80E-01
TMEM256	-1.43373	0.821102	4	CAGGGAAAGATTACCCAGAG;GGTGCAGAATAAGGTCGTTC;ATTCCCAGATGCCTACGGGA;CTTAGGCTTCGCTTCCTACG	-2.59;-2.13;-1.05;0.03	8345;11532;24342;52217	5.14E-01;1.02E+00;1.07E+00;6.85E-01	25225;53100;65910;69097	3.99E-01;5.55E-01;4.35E-01;1.98E-01
TMEM254	-0.970545	0.577664	5	TTCTGATAAGGGATACTCTG;GAGAATCGCTTGAATCCGGG;GGCGCGACCTACTTTCAGCG;AGTATCCCTTATCAGAACCT;TCCACCAAGTACTGAGTGAA	-3.42;-1.64;-0.32;0.0;0.52	2540;15856;41874;51401;64237	8.43E-01;6.76E-01;4.77E-01;4.86E-01;4.06E-01	13205;26041;35568;61585;74896	3.94E-01;4.81E-01;5.48E-01;3.88E-01;7.26E-02
TMEM253	-0.294702	0.523164	4	CCTGAACTCTGATTGTCACA;GCAGGCGACTGAGACAGCAA;TTCATTGACCAGTACCTGGG;TCTGGAAAAGCTACAACACT	-1.45;-0.82;0.18;0.91	18109;29062;56073;70612	3.76E-01;4.82E-01;3.78E-01;1.60E-01	6830;21369;48380;59333	5.73E-01;6.21E-01;4.37E-01;4.63E-01
TMEM252	-0.0852603	0.648463	4	CAGCACGTACCTGTCTACTG;TCCAGAAAATTCCACTCAGA;CTGAAAGCAAAGGAGTGTTG;GCTCCATATTCGACTGTCAG	-0.59;-0.57;-0.05;0.87	34424;35019;49373;70116	5.16E-01;4.34E-01;4.25E-01;1.73E-01	7326;28069;42423;43018	5.52E-01;4.94E-01;5.27E-01;1.02E+00
TMEM251	-1.07632	0.7303	4	TTTCAAGGAGTGTGTCCATG;TGTCCACACCCAAAAAGGCA;ATAGTAAAATGCTGCTGCAC;ATGAACTTCCGTCAGCGGAT	-4.17;-0.98;-0.26;1.11	332;25652;43536;72613	1.77E+00;5.31E-01;5.07E-01;1.12E-01	4830;33906;51790;77111	6.87E-01;4.39E-01;4.02E-01;7.42E-03
TMEM250	-2.82378	2.32976	4	GGCTGCAGCTAAAGTAGAGT;ACGTGTACATCAAGACGCGC;CGCGAACGCCCAGGTACTGT;CTGTTCACTGCGGCGCTCTG	-3.92;-3.72;-3.57;-0.08	751;1283;1833;48569	1.42E+00;2.80E+00;4.29E+00;8.10E-01	28873;75609;76163;76691	4.34E-01;2.49E+00;1.20E+00;1.69E-02
SIPA1L1	-0.897131	0.773264	7	ACTAAGGGTAGACTCAAAGG;GCCGAGGCGGGCAGATCACG;ATGATGACTGCACCCCGCGG;CAAGGCAGGCAGATCACCTG;CTTGCCAGAAGGGTCGATAG;GTAGGAGGAAGAGGAAGAGG;AAAGATGACAAATCTGATCG	-3.04;-1.31;-0.6;-0.53;-0.42;-0.32;-0.06	4984;20055;34095;35879;39077;41832;49108	5.20E-01;5.02E-01;5.33E-01;6.03E-01;7.73E-01;1.10E+00;1.38E+00	28334;35610;38365;41563;43347;57387;72462	7.79E-01;6.90E-01;5.59E-01;5.39E-01;6.50E-01;5.23E-01;2.02E-01
SIPA1L3	-0.770578	0.679468	8	GGTGTTCAACTGCTACTGCG;GGAATCTCACTCTGTCACCC;GCCGAGGCGGGCAGATCACG;CCAAGATGGCCCATTCCATG;CAAGGCAGGCAGATCACCTG;TCCTGCCTCAGCCTCCCGAG;ACCTCGTCCATCGACGTGCA;TTGAGGACGGCACTCCCCGG	-2.04;-1.53;-1.31;-0.97;-0.53;-0.4;0.25;0.37	12221;17134;20055;25777;35879;39519;57859;61006	4.21E-01;5.15E-01;6.63E-01;7.69E-01;7.33E-01;9.26E-01;5.80E-01;8.29E-01	16436;19583;37923;41563;51665;57387;60308;65221	4.95E-01;5.07E-01;6.43E-01;5.73E-01;5.64E-01;5.07E-01;5.12E-01;5.97E-01
SIPA1L2	-0.601065	0.562308	6	TGGCTACGAGGGCTAATGTG;GCCGAGGCGGGCAGATCACG;CAAGGCAGGCAGATCACCTG;CATGTGGCACGTGATAGCCC;GCTAGGCATGGTACCGCACG;GGAGATCTGCAAAGTAGCCG	-1.75;-1.31;-0.53;-0.16;-0.13;0.27	14797;20055;35879;46438;47126;58579	4.01E-01;5.18E-01;5.12E-01;5.07E-01;7.08E-01;7.27E-01	18863;30316;31004;41563;57387;62645	4.41E-01;5.01E-01;5.58E-01;5.73E-01;4.59E-01;5.53E-01
LOC105371887	-0.533336	0.334131	1	CAAGGCAGGCAGATCACCTG	-0.53	35879	0.334	41563	0.27
LOC105371881	-1.52854	0.655112	1	GGAATCTCACTCTGTCACCC	-1.53	17134	0.655	60308	0.109
QKI	-0.732174	0.567992	4	GGATGTAAAATCATGGTCCG;GGGAGAATCCTTGGACCTAG;ATTCTTACGTGATTTAATGT;AAATAGAGGCAAGCCCAATT	-1.48;-1.09;-1.07;0.72	17682;23614;23828;67752	3.77E-01;5.69E-01;1.09E+00;2.32E-01	9690;53614;53828;59760	4.75E-01;5.65E-01;3.88E-01;4.50E-01
SLC35F5	0.0853997	0.752411	4	CCCCCAAAAAGTCTCGTGTG;TCAGAAGGGCTCTTAAGACA;AATTTCACAGGCACATACAG;GCAGTATTTCCAAGTAACAG	-0.81;-0.06;-0.0;1.21	29145;49306;50842;73516	4.38E-01;4.93E-01;4.10E-01;9.04E-02	3926;26600;28136;48297	7.61E-01;5.16E-01;9.13E-01;8.20E-01
SLC35F4	-1.60789	1.11815	5	ATTCTTGAACTTCAAAACCA;GATGACCAGAATAATAGACT;TCAGTCACTAGATGTAAACC;GCCGAGGCGGGCAGATCACG;TGCACGTCCATGGTTCTGAA	-3.73;-2.28;-2.22;-1.31;1.5	1225;10485;10864;20055;75113	1.13E+00;9.26E-01;1.69E+00;1.78E+00;6.63E-02	2329;57387;66585;66957;76216	8.76E-01;1.02E+00;9.03E-01;4.22E-01;3.46E-02
SLC35F6	-0.979477	0.660208	5	CCCATGTACTACATCCCCGC;GATGATCAACAGGTCCCCTG;CAAGGCAGGCAGATCACCTG;GGGACCAGCCTCATGTATGT;CGGCTCCATCAACACGCTCT	-2.64;-1.36;-0.53;-0.25;-0.11	7934;19269;35879;43687;47911	4.78E-01;5.81E-01;5.43E-01;6.56E-01;1.04E+00	29531;33755;41563;58173;69506	5.54E-01;4.67E-01;4.79E-01;4.02E-01;2.35E-01
SLC35F1	-1.27164	1.33438	8	TTCGTCGTAAAATTGCCAGG;CATCCGAACTCTGAGCCGAG;AAGATACGAATCTCTTAAGG;GCCAAGAAGCACAACAAAAA;GCCGAGGCGGGCAGATCACG;CCTGGAAGCAAATTATCTGG;AAATAAGGAGGGATAACACC;TCCTGCCTCAGCCTCCCGAG	-2.04;-1.84;-1.38;-1.38;-1.31;-1.3;-0.52;-0.4	12249;13907;19006;19049;20055;20096;36292;39519	4.21E-01;5.60E-01;6.94E-01;1.08E+00;1.58E+00;2.33E+00;1.68E+00;2.34E+00	37923;41150;57346;57387;58393;58437;63535;65193	1.45E+00;1.08E+00;1.57E+00;1.02E+00;6.92E-01;5.07E-01;4.44E-01;5.98E-01
SLC35F3	-0.903618	0.861632	8	TCTTCCCGTTGTACTACGTG;GAGAATCGCTTGAATCCGGG;GGAATCTCACTCTGTCACCC;GCCGAGGCGGGCAGATCACG;GTGATGATGACCTACGCTGA;CAAGGCAGGCAGATCACCTG;GAGTGTCCAAAGAACACCAA;GGCTCACGTCCATCGAGGAG	-1.72;-1.64;-1.53;-1.31;-0.65;-0.53;-0.52;0.67	15079;15856;17134;20055;32940;35879;36154;67000	4.66E-01;5.27E-01;7.60E-01;1.02E+00;8.30E-01;1.10E+00;1.69E+00;5.03E-01	10442;41288;41563;44502;57387;60308;61585;62363	4.07E-01;1.08E+00;7.33E-01;6.02E-01;6.63E-01;5.15E-01;4.82E-01;7.52E-01
SLC35F2	-0.84373	0.508888	5	TGATAAAGCTCTGAAGCATG;GCCGAGGCGGGCAGATCACG;TTGGTGCAGACATACTAGCA;ACAAGGACAACATCTGACCC;CATGACAGAGCCATCAACAC	-3.24;-1.31;-0.5;0.11;0.71	3583;20055;36894;54383;67661	7.18E-01;5.64E-01;5.28E-01;4.41E-01;2.93E-01	9781;23059;40548;57387;73855	4.34E-01;5.13E-01;4.87E-01;4.08E-01;1.03E-01
SUPV3L1	-1.64907	0.960565	4	GCTTATGTACACAACGGGGG;GCTACAGATGCAATTGGCAT;AGTCGGCAGATTGAAATTCG;GGAGAAACTAACCAGTTAGG	-2.84;-2.36;-1.2;-0.19	6420;9868;21700;45546	5.92E-01;1.13E+00;1.20E+00;9.22E-01	31896;55742;67574;71019	4.75E-01;6.12E-01;4.70E-01;1.50E-01
LMAN1L	-0.820119	0.544918	4	TTGTACTCAAACCTGCGTAG;GAGCACGGATCACCTACTGG;CAGGCCGTGTGGTACACCCG;AGACCCCAAAGAAACCTCCA	-1.93;-1.49;0.06;0.08	13140;17621;53015;53442	4.11E-01;7.32E-01;3.93E-01;6.44E-01	24000;24427;59821;64302	3.90E-01;5.53E-01;3.77E-01;3.23E-01
TSPAN18	-0.180759	0.604823	4	GCAGCAGACACTTGTTCTCA;CATCGGCATCTGGGTCATGG;GAGCTCACCAAGCACTACCA;GGAGGATGTAGGCGCCCGTG	-1.12;-0.73;0.51;0.62	23041;30998;63973;66018	3.85E-01;4.61E-01;4.07E-01;2.77E-01	11424;13469;46444;54401	4.37E-01;9.07E-01;4.62E-01;6.13E-01
TSPAN19	0.343604	1.0174	5	GAGAATCGCTTGAATCCGGG;AATCAGATGGCTCCTAATTG;TATTCATGGGATTTGGTGCA;GGCATTCAGAATAGTCCACT;GCCAACATAATTACACAGAC	-1.64;-0.59;-0.01;0.98;2.97	15856;34508;50576;71467;77212	3.88E-01;4.71E-01;4.75E-01;5.53E-01;6.43E-03	230;5975;26866;42934;61585	1.83E+00;1.33E+00;7.49E-01;6.77E-01;4.97E-01
MPC2	-0.0508162	0.708263	4	CCGTTGTACAACCATCCAGC;GCATCAGCTCCACTTTATCG;CTGGGCTCCAATTATGAAAT;TGATGCTGCCCGAGAAATTG	-0.51;-0.13;-0.08;0.52	36357;47153;48762;64176	5.52E-01;4.68E-01;4.32E-01;3.26E-01	13266;28680;30289;41085	4.09E-01;4.86E-01;8.36E-01;1.10E+00
MPC1	-0.356642	0.508521	4	AGCAATGGGAAGACCCCAGT;AGTCTCCAGAGATTATCAGT;GCGGCGCTCGTCACCTCATG;TGTCAAAGAATAGCAACAGA	-1.68;-0.47;0.25;0.47	15463;37532;57966;63248	3.88E-01;4.27E-01;3.75E-01;3.52E-01	14194;19476;39910;61979	3.99E-01;6.72E-01;5.76E-01;3.87E-01
TSPAN10	-0.891108	0.628506	4	CCTGGAGCACACCCTGCGTG;TGTTCCAGCGTCAAGGATGG;GAGAACACCTGCCTGTTACG;ACCAAGCACCAGGCCTTGAG	-1.88;-1.01;-0.46;-0.21	13522;25075;37790;44987	4.06E-01;5.41E-01;6.23E-01;9.44E-01	32455;39652;52367;63920	4.83E-01;4.26E-01;3.97E-01;3.33E-01
TSPAN11	-1.2661	0.719255	5	GCCCGCAAAGATGAGGATGT;GTAGCCACTCTTCTCCACCA;CAAGGCAGGCAGATCACCTG;TACCCTCTGGTAATACACAT;CACGCAGATCACCGCCTCAG	-3.21;-2.77;-0.53;-0.14;0.32	3758;6982;35879;46988;59714	7.01E-01;1.21E+00;5.43E-01;5.74E-01;5.64E-01	17728;30454;41563;70467;73684	3.93E-01;4.62E-01;4.79E-01;5.10E-01;1.08E-01
TSPAN12	-0.593162	0.5984	4	CAGCAAACAGCAATCATGAC;GTGGGGATGTTAGGATATTG;AGAAACTGCCAACACACTGA;ATGGATTACCTAGATATCGG	-3.59;-0.1;0.61;0.7	1775;48114;65885;67526	1.07E+00;4.79E-01;4.35E-01;2.38E-01	9916;11557;29328;75665	4.69E-01;1.01E+00;8.70E-01;4.03E-02
LOC107984530	-0.533336	0.334131	1	CAAGGCAGGCAGATCACCTG	-0.53	35879	0.334	41563	0.27
TSPAN14	-0.774995	0.564718	5	CAGATCGATATCGTCCCGGT;GCCGAGGCGGGCAGATCACG;AACGTCTACTTCAATTGCAG;GATGCATGGAATCGACCCTG;GCGTGGTGATGTTCACCCTG	-2.03;-1.31;-0.47;-0.3;0.23	12350;20055;37597;42279;57527	4.00E-01;5.64E-01;5.19E-01;6.95E-01;6.46E-01	19915;35163;39846;57387;65092	4.07E-01;4.74E-01;4.93E-01;4.08E-01;3.77E-01
LOC107984536	-0.466652	0.443852	2	CAAGGCAGGCAGATCACCTG;TCCTGCCTCAGCCTCCCGAG	-0.53;-0.4	35879;39519	3.03E-01;5.84E-01	37923;41563	3.01E-01;5.41E-01
TSPAN16	-0.608661	0.540471	6	GAGAATCGCTTGAATCCGGG;GGTATGCGGAGGACAGCCCG;GCCGAGGCGGGCAGATCACG;CAGACGACTATTCTACACAG;AAAGAAAAGAAGGACCACTG;TTTAGTCGCTCCATACCACC	-1.64;-1.33;-1.31;-0.54;0.47;0.7	15856;19711;20055;35785;63131;67450	4.08E-01;5.23E-01;8.50E-01;7.04E-01;3.99E-01;3.60E-01	9992;14311;41657;57387;57731;61585	4.11E-01;6.45E-01;5.13E-01;5.18E-01;4.54E-01;5.97E-01
TSPAN17	-1.19854	0.62824	4	CCGAGGAACACGGAGAACTG;TCAGCGCTGACAGATCTGGG;GGTAGTTGGAGGCGTCATGT;TATTGAGGTTCCAGTCATTG	-3.09;-1.99;-0.52;0.8	4633;12653;36262;69004	7.01E-01;9.50E-01;6.61E-01;2.00E-01	8438;41180;64785;72809	5.11E-01;4.29E-01;4.17E-01;1.07E-01
SPRY4-AS1	-1.15607	0.758114	3	GGAATCTCACTCTGTCACCC;TCGCCCAAGCTAGAGTGCAG;CAAGGCAGGCAGATCACCTG	-1.53;-1.41;-0.53	17134;18711;35879	3.95E-01;8.77E-01;1.00E+00	41563;58730;60308	4.61E-01;3.80E-01;3.26E-01
LOC101929106	0.0429122	0.717979	4	AGAACACGGAGAGTGAGGGT;GTCTCGTCAGTAGTGAGGGA;AAAGCGTGACCACAGATGAG;CACCTGGCAGTCGCCCTACG	-0.96;-0.15;0.36;0.92	26057;46690;60658;70687	4.05E-01;4.64E-01;3.80E-01;1.59E-01	6755;16784;30752;51385	5.76E-01;7.62E-01;8.21E-01;7.13E-01
EAF1	-0.695155	0.470099	4	GGAGCTCTGAATGGCATAGG;ACCGCGAGGAACATTGCCTG;CTTATTATTAATCATGACAC;CTGACTTACAACGAATAGTG	-2.49;-1.34;0.47;0.58	9016;19535;63099;65395	4.93E-01;6.71E-01;3.97E-01;2.94E-01	12047;14343;57907;68433	4.26E-01;8.64E-01;3.75E-01;2.15E-01
EAF2	-1.31547	0.953528	4	CCTTTGAAAACAGTTACTGG;CTCACTCACAGCGCACAGTG;CGAGCGGGTTCTCAAGTTAG;ACCATGATACTGGAGAATGT	-4.56;-1.13;0.04;0.4	72;22817;52246;61565	2.43E+00;5.86E-01;3.98E-01;3.99E-01	15877;25196;54625;77370	3.85E-01;5.39E-01;3.83E-01;1.59E-03
FOXF1	-0.572247	0.454263	4	GGCGGCCACTCGTACATGGG;AGTGGCCGTTCATCATGCCC;AAGGCCAAGAAGACCAACGC;CATTTCCTTCGGAAGCCGCG	-2.16;-0.4;0.05;0.22	11331;39434;52779;57234	4.39E-01;4.26E-01;3.94E-01;5.25E-01	20208;24663;38008;66117	3.75E-01;5.49E-01;6.18E-01;2.75E-01
FOXF2	0.0560132	0.788989	4	CCAAGCCGCTCACCACGCGG;CCGCACATGTCGCCCAACCC;AGCCCGCGGGCATCATGTCG;TGCTTCATCAAGCTGCCTAA	-0.35;-0.11;0.03;0.65	41033;47839;52179;66538	6.57E-01;4.76E-01;3.99E-01;2.64E-01	10904;25263;29603;36409	4.47E-01;5.38E-01;8.60E-01;1.31E+00
RBPJL	-0.855552	0.491565	4	CTCCACACGCTACCTCTCTG;GAATGCACACTTGTGCAGCT;CGAACGTAGCCCTCTCGCGG;GCGGATCCTGCATGCCAAGG	-2.84;-0.71;-0.23;0.36	6402;31463;44293;60744	5.93E-01;4.57E-01;4.94E-01;4.22E-01	16698;33149;45979;71034	3.81E-01;4.44E-01;4.68E-01;1.50E-01
TMUB1	-0.206404	0.576454	4	AAGGAGCCAATGGTGTCGTG;GAATTTCAGCCGTAGCACGA;GGTCTCAACGCACACCGCTG;AGGTGCGACTCATCTACCAA	-0.77;-0.56;-0.19;0.69	30161;35324;45510;67282	4.50E-01;4.33E-01;4.75E-01;2.44E-01	10160;31932;42119;47281	4.63E-01;4.53E-01;5.32E-01;8.57E-01
TMUB2	-0.192788	0.636147	4	CAGATGAAACTGATCTACCA;ATTTGAGCCGCACAGTGATG;TGAACTCCCCCATCCATCAG;GCTAGGCCAGAGGATACCGT	-0.54;-0.46;-0.01;0.24	35745;37791;50643;57651	5.40E-01;4.26E-01;4.12E-01;5.13E-01	19791;26799;39651;41697	3.75E-01;5.12E-01;5.82E-01;1.08E+00
SCGB1C1	-0.844476	0.749122	7	CCCCAGAGGAGCTCTATGAG;TTCCTGCAAACACTACTGGT;CTCACGGCAGATGCAGAACA;TGATGCAGGGATGGCCACAG;CAATGTCAACGAAGATGCCA;GAGCTCTATGAGGGGACCTT;GGCAGATGCAGAACAGGGTG	-1.89;-1.55;-1.41;-0.51;-0.46;-0.07;-0.02	13511;16828;18604;36623;37835;48960;50277	4.13E-01;5.36E-01;7.91E-01;5.91E-01;8.16E-01;7.84E-01;1.31E+00	27165;28482;39607;40819;58838;60614;63931	7.36E-01;5.42E-01;5.74E-01;5.44E-01;5.13E-01;4.56E-01;5.83E-01
SCGB1C2	-1.16488	0.875521	7	CTCATCGTTGTCCTCCCCCG;CCCCAGAGGAGCTCTATGAG;TTCCTGCAAACACTACTGGT;CTCACGGCAGATGCAGAACA;CAATGTCAACGAAGATGCCA;GAGCTCTATGAGGGGACCTT;GGCAGATGCAGAACAGGGTG	-2.75;-1.89;-1.55;-1.41;-0.46;-0.07;-0.02	7097;13511;16828;18604;37835;48960;50277	4.43E-01;6.11E-01;8.70E-01;1.29E+00;8.16E-01;7.84E-01;1.31E+00	27165;28482;39607;58838;60614;63931;70344	7.36E-01;5.42E-01;5.74E-01;7.91E-01;5.36E-01;4.13E-01;2.92E-01
KIAA1644	-0.0787981	0.710346	4	TCATTGCCGAGTAATACAAA;GAACCATACACAGACCACAA;GATCCACACTCCCAACAAGG;CTGTTGTCACCATAACAACA	-1.74;-0.79;0.56;1.66	14871;29546;64949;75673	3.92E-01;4.76E-01;4.19E-01;4.01E-02	1769;12493;47896;62571	1.07E+00;9.59E-01;4.42E-01;3.70E-01
SYNCRIP	-0.266888	0.723647	4	GATGACAAGAAAAAAAACAG;TGAGAAAGCTGGACCTATAT;TATTCCTAAGAGTAAAACCA;TGAGCGAGATGGTGCTGTCA	-2.58;0.15;0.62;0.74	8395;55436;66126;68085	5.12E-01;6.05E-01;4.39E-01;2.24E-01	9357;11316;22006;69060	4.84E-01;1.03E+00;1.18E+00;1.99E-01
TBC1D7-LOC100130357	-0.994008	0.888147	9	CAGACAAAGTTGTGCATGAG;AAAAAAGCCCTCACCAACTG;GCCGAGGCGGGCAGATCACG;GCACCTTCCATACCAATGCA;AGTTCTGGAATTCTGGCTCA;CTTACGATACATCATCACCT;CAAAAGTGACCACTAACCAG;TCTCCCGCTTCTCCACTCCG;GAGAGTTACTTGCACCCAAG	-3.92;-2.1;-1.31;-1.28;-1.22;-0.92;-0.45;0.0;2.26	752;11821;20055;20398;21379;26769;38202;51174;76775	1.09E+00;5.80E-01;6.17E-01;8.81E-01;1.26E+00;1.40E+00;1.18E+00;9.55E-01;3.38E-02	667;26416;39241;50673;56063;57044;57387;65621;76690	1.14E+00;6.46E-01;8.03E-01;9.43E-01;8.37E-01;6.10E-01;5.28E-01;4.38E-01;3.81E-02
MMAA	-1.40366	0.866536	4	GCAGCATCCACTTTGTACAA;AAACCACTAGCATTTCGAGT;GAAAGATGAAGTGGTAACAT;GAAGCTATTCTGTTGTGTGA	-2.94;-1.99;-1.94;1.26	5644;12583;13079;73851	6.34E-01;9.54E-01;1.80E+00;8.25E-02	3591;64362;64860;71815	7.94E-01;9.27E-01;4.18E-01;1.31E-01
PRR23D1	-0.632551	0.810679	8	TTTGGGTGGATTCATTTGTG;CTGACCTCAGGACATGCTCA;CATGCTCAGGGACAATCACA;GAACCGCAGAATGACAATGA;AAGCTGAAGTCATCAACGGA;TTGGAGTTCCATGCTCAAGA;CAGCTGCAGCACTGTCTCTG;GACTGGTATGAATTCAGGTG	-1.61;-1.22;-0.65;-0.5;-0.36;-0.35;-0.25;-0.11	16162;21344;32799;36669;40524;41037;43868;47827	4.89E-01;5.12E-01;5.67E-01;5.68E-01;6.23E-01;8.63E-01;1.19E+00;1.67E+00	29615;33574;36405;36918;40773;44643;56098;61280	9.80E-01;7.60E-01;6.14E-01;5.67E-01;6.19E-01;7.34E-01;6.37E-01;8.13E-01
TYR	-0.409239	0.509801	4	ATATTGATGTCGTTAAACAT;TGGTATGCTTTGCTAAAGTG;ATGACAAATCCAGAACCCCA;TGCACAGATGAGTACATGGG	-1.55;-0.37;0.14;0.15	16825;40324;54975;55455	3.80E-01;4.27E-01;3.82E-01;5.80E-01	21987;22467;37118;60617	3.80E-01;5.94E-01;6.40E-01;4.26E-01
LOC102723840	-1.52854	0.655112	1	GGAATCTCACTCTGTCACCC	-1.53	17134	0.655	60308	0.109
ALG8	-1.23967	0.703952	4	TGTTTCACTGCAAATAAACC;TCGGTGTACTTCAAAATCTG;TACCTGAAATAATCGTGCAA;AAGAGTCGGGAAAAGACTTG	-2.97;-1.22;-1.03;0.26	5445;21296;24774;58170	6.46E-01;6.23E-01;1.05E+00;4.97E-01	19273;52668;56146;72002	3.75E-01;5.47E-01;3.78E-01;1.27E-01
PDXK	-0.183655	0.645819	5	CTGTCTTCCAGGTTACTGAG;TCCCCCTAAAGGTTATACGA;CAAGGCAGGCAGATCACCTG;GAGCTCCAGGAGTTGTACGA;TTTCTTTGTAGACGGGAAGG	-0.89;-0.77;-0.53;-0.07;1.34	27442;30109;35879;49044;74319	5.12E-01;4.62E-01;5.43E-01;5.30E-01;8.94E-02	3123;28398;41563;47333;50000	7.67E-01;4.67E-01;4.79E-01;5.67E-01;9.50E-01
ALG2	-1.79938	1.0327	4	CAGGAAAACCATGCGCACGT;GGAGAGGGTTCATCTGATCG;CACAGCGCACCGGTAGCTCG;TCTCCATCAACAGATACGAA	-3.17;-2.86;-1.15;-0.02	4047;6258;22536;50424	7.50E-01;1.48E+00;1.16E+00;7.45E-01	27018;54906;71184;73395	4.14E-01;5.93E-01;6.00E-01;9.32E-02
ALG3	-0.183887	0.617979	4	GCGGCTCTTCAATGACCCAG;TATGACTATACCCAACTGCA;CACACAGTTTGGCTTCCGTG;CACCCTGTGAATGACCCAGA	-1.08;-1.01;-0.18;1.54	23753;24998;45734;75252	3.88E-01;5.43E-01;4.72E-01;4.98E-02	2190;31708;52444;53690	9.84E-01;4.55E-01;3.97E-01;6.36E-01
ALG1	-0.873883	0.571368	4	AGCAATGCTAGGCAGACCTG;GCATAGCATTGGTAACACAC;AGAACCTGAGGACCCAGTCA;ACTCCGTACTGGAAAACTCG	-1.86;-1.25;-0.65;0.26	13766;20935;32928;58142	4.03E-01;6.32E-01;7.53E-01;4.98E-01	19300;44514;56507;63676	3.75E-01;4.46E-01;3.77E-01;3.40E-01
ALG6	0.342557	1.09619	4	CAAATAATCCACGATCAACC;TCATAATCACCAAACATAGG;ATTATTAATTGGATGTGACG;AAAATGCCAGTGACCCTAGG	0.01;0.17;0.27;0.91	51651;56055;58488;70588	1.01E+00;6.20E-01;3.75E-01;1.61E-01	6854;18954;21387;25791	5.72E-01;6.88E-01;1.21E+00;1.91E+00
ALG5	-0.388499	0.597099	6	GAGAATCGCTTGAATCCGGG;GGAATCTCACTCTGTCACCC;ATCACTTCATAAGTGAACGC;AGCAGTTGTAAATGCAACGA;CAAAGTACGTGTGATAACCC;GTAGGTGAGTCCCATATGCT	-1.64;-1.53;-0.58;0.32;0.49;0.62	15856;17134;34639;59620;63546;66010	4.08E-01;5.69E-01;5.20E-01;5.54E-01;3.97E-01;4.16E-01	11432;13896;17822;42803;60308;61585	4.00E-01;6.60E-01;9.54E-01;5.53E-01;4.20E-01;5.97E-01
LOC107985664	0.708846	1.53442	4	TACAATTTAGTCAGCAAACG;ACGAGCAGTCCAGACGTTTG;GTTGGCTATTAGTGTCACTG;GGCATCAACGACTAGCATGG	0.06;0.62;0.88;1.27	52992;66013;70283;73915	1.06E+00;1.02E+00;5.58E-01;8.10E-02	3527;7159;11429;24450	8.00E-01;1.37E+00;1.96E+00;2.00E+00
WIF1	-0.0139165	0.748681	4	CCAGGCGGGTGCCGAAATGG;TGCCTCACAAGGCATCAGGT;GAGCATCGATCCATAGGTAC;AGTCCACCATTCATACATCG	-1.47;0.17;0.38;0.87	17794;56008;61119;70057	3.77E-01;6.19E-01;3.83E-01;1.74E-01	7385;16323;21434;59648	5.49E-01;7.80E-01;1.21E+00;4.54E-01
LOC107985663	-0.399969	0.310068	1	TCCTGCCTCAGCCTCCCGAG	-0.4	39519	0.292	37923	0.31
PDXP	-0.712799	0.464801	4	CACGGTCGGTGGCCACGAGT;GGTCCTGTTCGACTGTGACG;CTCGTCGTAGCCCACAAGCA;GCAACAACAGCCGGCGCGCG	-2.52;-1.53;0.02;1.18	8806;17107;51768;73286	4.99E-01;7.50E-01;4.02E-01;9.58E-02	4156;25674;60335;68642	7.40E-01;5.31E-01;3.79E-01;2.10E-01
RNGTT	-1.22646	1.03418	6	AGACCACCAGGAATCTACAA;GAAAGAAGGAATCAGAACCC;GGAATCTCACTCTGTCACCC;TCGCCCAAGCTAGAGTGCAG;CAGAAGTGTCATCAATTCTG;TTATCAAATACTCTCTTGGA	-2.68;-2.56;-1.53;-1.41;-1.29;2.1	7645;8515;17134;18711;20334;76605	4.53E-01;9.44E-01;9.90E-01;1.53E+00;2.26E+00;2.83E-02	837;57108;58730;60308;68935;69796	1.21E+00;1.41E+00;9.10E-01;5.69E-01;4.34E-01;2.71E-01
RPL32P31	-2.29222	1.12018	2	CATATCGGTCTGACTGGTGC;GGAATCTCACTCTGTCACCC	-3.06;-1.53	4852;17134	9.30E-01;1.31E+00	60308;72592	4.63E-01;5.62E-02
KIAA1683	-0.869303	0.519108	4	ACAGGCACATACACGTGAGG;ATTGTCCAGAAGGTATGACC;CTGACCAAGACGCAGTCCCG;CATCCATGAGAACCCACCCA	-3.16;-1.24;0.39;0.53	4122;21063;61350;64371	7.43E-01;6.28E-01;3.84E-01;3.21E-01	13071;16092;56379;73320	4.11E-01;7.89E-01;3.77E-01;9.50E-02
KIAA1324L	-0.235786	0.589672	4	TAGACGGTTCATCAATGACA;TATCAGTTTATGTGGGCATG;GGCACATTCAGCAACAAACC;GCTGGAGATCATATCCAGAG	-1.58;-0.15;0.31;0.47	16524;46673;59565;63206	3.81E-01;4.63E-01;3.77E-01;3.53E-01	14236;17877;30769;60918	3.98E-01;7.23E-01;8.20E-01;4.17E-01
INSL5	0.091321	0.941486	4	CAGAAAACTCACGTTTATGT;GGGATCCCTCAAGCTCAGCA;TCCAGCGCAAAACCTTCCGA;AGGAGTCTGTGAGACTCTGT	-2.38;0.15;0.69;1.9	9772;55298;67398;76275	4.73E-01;6.02E-01;4.66E-01;2.64E-02	1167;10044;22144;67670	1.24E+00;1.12E+00;1.18E+00;2.34E-01
INSL4	-0.0372016	0.730338	4	AACAAAGATGGACAAGCCTT;TGAATGTCTTCTCAGGCATG;CTGGAATCTGGACGTCCCAA;AGATTGCTGGCAGATAGGAC	-1.6;0.13;0.35;0.97	16332;54740;60405;71366	3.82E-01;5.89E-01;3.79E-01;1.42E-01	6076;17037;22702;61110	6.10E-01;7.53E-01;1.15E+00;4.11E-01
INSL6	-0.444151	0.732114	8	AGAAAACGATCAAACCCCAC;GAGCCAGTTCCGTTTCGAGG;GTAGGCTTCGACCTTCTCCG;AATGAAGAGTACAACCTCAG;AATTCTCTTGTCTTACCAAG;TCTTCAGGAGAGAATACCAT;CTGCCACTGCAATACCAACG;CACGAGAAAACCGAACCAGC	-0.94;-0.91;-0.74;-0.71;-0.67;-0.53;0.04;0.92	26394;27029;30659;31342;32321;36039;52507;70628	8.31E-01;5.86E-01;5.53E-01;6.27E-01;8.53E-01;1.09E+00;7.70E-01;3.20E-01	6814;24935;41403;45121;46100;46783;50413;51048	4.32E-01;5.50E-01;7.29E-01;6.11E-01;5.57E-01;6.71E-01;8.59E-01;1.45E+00
GALR1	-0.470893	0.591891	4	CGTGGAGAACTTCGTCACGC;GGAGCGCCGCGAGTGCACGA;GACGAAGGTGCACACCACGT;GGTGGGCAGCGCGTACACGG	-2.49;0.14;0.15;0.31	8999;55214;55456;59466	4.94E-01;6.00E-01;3.80E-01;4.59E-01	17976;21986;22228;68443	3.76E-01;6.06E-01;1.17E+00;2.15E-01
INSL3	-0.369006	0.663166	4	GGCCGACAGTAATCTCACGC;CTAGCGCGCGTACGAAGTGG;GCCAGGAGGCCTGCGACCGG;CAACTTCTCACGCATCTCTG	-2.75;-0.68;0.84;1.11	7088;32178;69705;72696	5.61E-01;4.51E-01;5.36E-01;1.10E-01	4746;7737;45264;70360	6.93E-01;1.31E+00;4.79E-01;1.67E-01
RPS15AP39	-1.53385	0.656458	1	CTCACTGTGATGATGAAGCA	-1.53	17081	0.656	60361	0.108
RPS15AP33	-1.53385	0.656458	1	CTCACTGTGATGATGAAGCA	-1.53	17081	0.656	60361	0.108
RTN1	-0.788622	0.460645	4	GCAGTGCAGAAAACCGACGA;GTAAAACAGACTTGTAGATG;ACAGCACACTTAAGGAACTG;GTTCAGCGTGGTGAGCGTCG	-2.94;-0.63;-0.35;0.77	5635;33306;40889;68665	6.34E-01;4.43E-01;5.56E-01;2.09E-01	8777;36553;44136;71798	5.00E-01;4.29E-01;4.97E-01;1.31E-01
RDM1	0.30517	1.09384	4	ACATGCAAAGCCTCGGCCGT;GTGTTCCAAAAGGATCATCA;GAGCCCAAAAGGCATGCGAC;TTAATGACGGCATAGAAACC	-1.38;0.58;0.77;1.25	19099;65298;68607;73766	3.75E-01;9.79E-01;4.99E-01;8.45E-02	3676;8835;12144;58343	7.85E-01;1.21E+00;1.89E+00;4.92E-01
CLUL1	-1.02347	0.652357	5	TCTTTGAAATCAGGCCTCCG;GGAATCTCACTCTGTCACCC;GAGGTGAAGAAGGCTTTGAC;TCACTGCGCACCCACTTGGA;TGCACAATTGACCCAAATGG	-3.0;-1.53;-1.43;-0.45;1.29	5216;17134;18452;38034;74053	5.94E-01;6.36E-01;1.11E+00;8.30E-01;9.71E-02	3389;39408;58990;60308;72236	7.38E-01;5.13E-01;6.00E-01;3.91E-01;1.51E-01
LOC105373909	-0.533336	0.334131	1	CAAGGCAGGCAGATCACCTG	-0.53	35879	0.334	41563	0.27
LOC101930090	-0.662498	0.430808	3	GAGAATCGCTTGAATCCGGG;GTGCCGCACCACCGTCCACG;TCACAATCTGAGTGACTGGG	-1.64;-1.1;0.75	15856;23401;68325	4.11E-01;7.19E-01;1.63E-01	9117;54041;61585	5.61E-01;3.55E-01;2.98E-01
LOC105373900	-1.50861	0.635825	2	TCAAGAGATAGCAACTGTGG;CCAAGAGAAAATGCAATGTG	-2.88;-0.14	6142;46871	8.36E-01;4.36E-01	30571;71303	3.21E-01;7.17E-02
LOC105373902	-0.875777	0.444864	1	ACCTTGGACATAAAAGCTCT	-0.88	27804	0.445	49638	0.193
LOC105373903	-0.920635	0.542073	2	GCCGAGGCGGGCAGATCACG;CAAGGCAGGCAGATCACCTG	-1.31;-0.53	20055;35879	4.16E-01;6.68E-01	41563;57387	3.03E-01;2.60E-01
LOC101927414	-1.30793	0.586748	1	GCCGAGGCGGGCAGATCACG	-1.31	20055	0.587	57387	0.13
INMT	-0.797737	0.533648	4	CCGGTTGCGGTCGGTAAAGT;ACAGGCGAATTTCACCGCTG;GGGGACACGCTGATTGACAT;TAAGTAGCCAAGTAGTCCCT	-3.3;-0.35;0.2;0.26	3244;40946;56617;58147	8.32E-01;4.29E-01;3.76E-01;4.98E-01	19295;20826;36496;74193	3.75E-01;6.35E-01;6.55E-01;7.44E-02
LOC101927418	-0.479928	0.535915	4	TCGAGTTGGGCATCGCCAGT;AATGAAGAGAGAGTTCCCTA;ACATGGAAACTTGATAAGAC;ATAGTAAAAACACCCCCCCA	-1.35;-0.87;-0.86;1.16	19479;28039;28072;73062	3.75E-01;4.95E-01;9.16E-01;1.01E-01	4380;49370;49403;57963	7.21E-01;4.94E-01;4.25E-01;5.03E-01
TMEM246-AS1	-0.243086	0.578247	4	CCACGTTGCACAGGAAGAGT;AAGCTCCTCAAAATAGTGGA;TCTCAAACGAGTTGGTCGAA;TCAAGCTGTATCACCCCGAG	-1.81;-0.13;0.0;0.96	14213;47278;51145;71246	3.98E-01;4.69E-01;4.08E-01;1.45E-01	6196;26531;30164;63229	6.03E-01;5.17E-01;8.41E-01;3.52E-01
LOC105375431	0.0977191	0.782325	4	GGGGAGTGTAGTCACCAACG;AAACCGTGAATGTTGATGTG;GAGTGATTGAAGAACTGACG;TCCTGGTACAAACTCCACGA	-1.16;0.1;0.23;1.21	22453;54066;57562;73500	3.82E-01;5.74E-01;3.75E-01;9.07E-02	3942;19880;23376;54989	7.59E-01;6.61E-01;1.11E+00;5.95E-01
FECH	1.4709	2.60505	4	TACAGATACTATAATCAAGT;TCCACTTGAGAAGAGAAGCG;TCTGAATAGGAAGTGTCATG;AAGATATGGACTTCCAAGCA	0.76;0.83;1.69;2.6	68494;69588;75763;77027	2.26E+00;1.30E+00;1.09E+00;9.31E-03	415;1679;7854;8948	1.68E+00;2.57E+00;2.43E+00;3.75E+00
ADAP1	0.265019	1.0271	5	TCCTGCCTCAGCCTCCCGAG;GTTTGTGCTGACAGAACGAG;GTGGGCCGGTAGTAGAAGGA;GCTTCCAGAGAAAACCCTCA;CAGGTGCTCGATCTTCATCA	-0.4;-0.34;0.2;0.83;1.04	39519;41128;56699;69556;72027	8.34E-01;5.36E-01;5.50E-01;4.80E-01;1.57E-01	5415;7886;20743;36314;37923	5.82E-01;1.12E+00;9.87E-01;8.91E-01;1.55E+00
ADAP2	-1.79602	1.12899	5	TGATGTCAGGGAAGTTACGG;CCTCCTGAAGTACTTCACAA;CTGGGACGACAGTATTGTGG;TCCTGCCTCAGCCTCCCGAG;TGTTTGTGTATCATGAAAGT	-3.64;-2.58;-2.26;-0.4;-0.1	1572;8397;10627;39519;47953	1.03E+00;1.08E+00;1.72E+00;7.80E-01;1.04E+00	29489;37923;66815;69045;75870	5.53E-01;4.97E-01;9.17E-01;4.65E-01;4.45E-02
KLHL10	0.503968	1.56896	6	GTGGGCGCCCTCCGCAAGGG;CAAGGCAGGCAGATCACCTG;TTCAACGAGCTTAGACTAGA;GCAACGTCTGGAGTGCATCG;TTGGTGAAATCAGAATTAGA;TCATTGAGTATGCATACACC	-1.54;-0.53;0.68;1.19;1.4;1.83	16984;35879;67145;73388;74632;76120	4.18E-01;5.73E-01;1.51E+00;1.48E+00;7.42E-01;4.48E-02	1322;2810;4054;10297;41563;60458	1.03E+00;1.77E+00;2.61E+00;2.45E+00;9.07E-01;6.45E-01
KLHL11	-0.826583	0.517011	4	CTCGACATGTCAAACCAGAG;TGATCCAGCAACATACACGT;GGGGCCCGAACCCGACACAG;TGGCGGCAGCCAGTACCGAG	-2.2;-2.11;-0.34;1.34	11066;11730;41263;74311	4.44E-01;1.00E+00;5.49E-01;7.17E-02	3131;36179;65712;66376	8.45E-01;4.30E-01;4.32E-01;2.68E-01
KLHL12	-0.172575	0.676292	5	AGTGCGACGAAATTCAGGTA;TCCTGCCTCAGCCTCCCGAG;CCCTGCATTGTAAACTACAG;GACATTCCACTGAACTAAGG;AGAAACAGTACATGTGACAG	-1.74;-0.4;0.1;0.54;0.63	14884;39519;54132;64614;66198	3.88E-01;5.15E-01;5.09E-01;3.96E-01;3.41E-01	11244;12828;23310;37923;62558	4.12E-01;7.98E-01;8.75E-01;8.33E-01;4.63E-01
KLHL13	-0.484884	0.511768	5	CATTAATTACGTGCAAACGG;CCATCATGACTCTATGCACA;TCCTGCCTCAGCCTCCCGAG;TAAAGTGTTTCTCATATCTG;ACCACTCACTTGGTTACACT	-2.16;-0.48;-0.4;0.21;0.41	11337;37244;39519;56934;61760	4.10E-01;4.90E-01;4.97E-01;4.12E-01;4.91E-01	15682;20508;37923;40198;66105	3.88E-01;5.55E-01;5.15E-01;7.58E-01;3.44E-01
KLHL14	-1.82616	1.05171	4	CCAGCAGTTCCATTGCCACA;GGTGCTCGAGTACCTCTACA;GCACCGAGATCTGGTCGTTG;AATACTGAACCAAATTGCTG	-3.5;-2.44;-1.38;0.02	2179;9331;18999;51799	9.86E-01;1.17E+00;1.35E+00;6.99E-01	25643;58443;68103;75263	4.02E-01;6.87E-01;4.84E-01;4.96E-02
KLHL15	-0.948505	0.823516	5	AGCCTGAAGAATCTCATGAA;GATTTCGGCGTAAACATCGA;CCCAGAGATAGAGCTGTACG;CAAGGCAGGCAGATCACCTG;CCTACAGCAAATTCAGAGCG	-1.44;-1.33;-1.1;-0.53;-0.34	18217;19775;23434;35879;41131	3.95E-01;5.70E-01;8.70E-01;9.08E-01;1.37E+00	36311;41563;54008;57667;59225	7.29E-01;5.43E-01;5.08E-01;4.06E-01;5.82E-01
KLHL17	-0.369308	0.723221	4	CACCACAATCTCAGCCGTGT;GAGCTGGGTGAAACACGACG;GGAGATCCGTGCGCACAAAG;ACGACCCCGTGACTAACACG	-3.22;-1.19;0.4;2.53	3704;21921;61692;76975	7.82E-01;6.07E-01;3.86E-01;1.05E-02	467;15750;55521;73739	1.63E+00;8.03E-01;3.80E-01;8.51E-02
KLHL18	-1.13564	0.938742	4	TGGACTTATCTACGCTGTAG;TCACCACAGCCACGCCAACG;GCTGTGCGACGTGACCCTCA;TAATGCAAGGAATGGACCCA	-1.46;-1.18;-1.15;-0.75	18033;21978;22484;30569	3.76E-01;6.06E-01;1.16E+00;1.61E+00	46872;54958;55464;59409	8.27E-01;5.94E-01;3.80E-01;4.60E-01
DMRTB1	-1.31339	0.78569	4	GTCTCCGGAGGGAGTCCCCG;GTGCCCGTCAAGGGACACGC;GCGGCCTCCGCCCCAAAAGG;TTACCAAAGTCGGTGAACAG	-2.19;-2.16;-1.22;0.32	11118;11333;21317;59669	4.43E-01;1.03E+00;1.22E+00;4.53E-01	17773;56125;66119;66325	3.77E-01;6.22E-01;4.39E-01;2.69E-01
C7orf61	-0.473859	0.45953	4	CGTGTTGGCCAAGACTACAG;GTTCTTCCGATGGGTTAGAC;TCAGGGTGTCCTGAGATGGT;TCGGGGGACTCACCCAACTT	-1.37;-0.55;-0.32;0.35	19123;35444;41859;60395	3.75E-01;4.32E-01;5.37E-01;4.32E-01	17047;35583;41998;58319	3.79E-01;4.32E-01;5.35E-01;4.93E-01
LOC107986927	-0.551009	0.339477	1	CGTCGCTGGTGGAAGCACGG	-0.55	35440	0.339	42002	0.266
LOC107986925	1.76029	1.71783	1	GGAAGCCACTGTGTGCCGGT	1.76	75959	0.00839	1483	1.72
PAQR9	-1.21929	0.706728	4	CGAGGTGCCCGACGACTTCG;GAACGGGTAGGTACACCAGT;TACGCGTCCATCAGCTACTA;CCCGACGCGTAGCACCACAA	-2.4;-1.78;-0.79;0.09	9620;14523;29645;53709	4.77E-01;8.56E-01;8.59E-01;6.36E-01	23733;47798;62919;67825	3.88E-01;4.75E-01;3.95E-01;2.30E-01
IGIP	-0.808783	0.479958	4	AGTGCTGGGAAATCACCATG;GGAGAACATGACAGCAAATA;TGTTCTCCCATCTCAGTGCT;CATGAAGAAACGCAGTGTGT	-3.21;-1.23;-0.11;1.32	3765;21132;47859;74204	7.76E-01;6.27E-01;4.43E-01;7.42E-02	3238;29583;56310;73679	8.32E-01;4.76E-01;3.77E-01;8.65E-02
SLU7	-0.0242546	0.791977	4	GAAAGCCCAGAAACTCCAAG;AATTTGGCTCCAACTCGCCT;TTTGAAGGATCAATATACCA;TCTGGAGAATGGTACAAGAG	-1.32;-0.89;-0.66;2.77	19910;27430;32666;77121	3.75E-01;5.03E-01;7.61E-01;7.19E-03	321;44776;50012;57532	1.79E+00;4.47E-01;4.18E-01;5.16E-01
IER2	-0.131375	0.63026	4	ACAGCGCATCATGACCCTGT;TATCACTCCCGCATGCAGCG;GCCCCGAGAAGCCGAGTCCA;GCACCCGTTTCCGGAGCCAA	-0.59;-0.53;-0.18;0.78	34345;35908;45792;68788	5.15E-01;4.31E-01;4.71E-01;2.06E-01	8654;31650;41534;43097	5.04E-01;4.55E-01;5.43E-01;1.02E+00
THAP12P7	-0.838923	0.424744	2	CAGAACCCCAGCGAAGAAGA;TGAATCTCATAACCTAAGAG	-1.69;0.01	15339;51669	4.98E-01;3.51E-01	25773;62103	3.53E-01;1.92E-01
THAP12P1	-1.55492	0.663222	1	TCAGCCTCATGTCCATCCAG	-1.55	16817	0.663	60626	0.106
LOC100130987	-0.757107	0.7645	8	CCTCCTCTTCACAACCGGGT;ACACCTCAGAGACCTAGCTC;GAAGCCTCAATGACAAACTG;CCACACCTCCAAGTCAACAG;TCCGCTTCCTCCTCGTCGCG;TGGCAGTACGGGCCCTGCAC;GGCCACGCAAGTAACACAGA;GCCAGCTCTCAATCGCACAG	-3.05;-0.97;-0.74;-0.54;-0.28;-0.26;-0.25;0.03	4928;25836;30892;35602;42871;43544;43660;52159	4.93E-01;5.64E-01;5.54E-01;5.74E-01;5.87E-01;7.71E-01;1.20E+00;1.37E+00	25283;33782;33898;34571;41840;46550;51606;72514	7.85E-01;7.67E-01;5.78E-01;5.83E-01;6.01E-01;6.77E-01;8.08E-01;2.28E-01
LOC105369340	-0.130002	0.585403	3	AACACACCTGGCAGTCGTAG;CACCGTCAAGTATGACCGCA;CTACTTTCAGAGCCCCCCCG	-1.32;-0.36;1.3	19836;40542;74072	3.71E-01;4.07E-01;5.80E-02	3370;36900;57606	9.23E-01;4.48E-01;3.86E-01
RTEL1-TNFRSF6B	-0.777049	0.648326	9	GGTGCCGGCTGTACGCGGAG;CCTGCTCATACTCCACACAC;CTTTGACGAAGCTCACAACG;GGAATCTCACTCTGTCACCC;GCAATCACGCCGGCACCAGG;GTTGTCATACACCCTGACGT;AACTGCGTGTAGTGGCGCGG;GTCACCGGAGGACGGCTCAG;AGGGCCGTGCAGTTGCGGTG	-2.91;-2.44;-1.98;-1.53;-0.87;0.33;0.54;0.7;1.15	5867;9377;12752;17134;28013;59860;64663;67477;73028	4.40E-01;6.70E-01;8.95E-01;1.06E+00;8.88E-01;6.78E-01;5.57E-01;4.15E-01;2.29E-01	4414;9965;12779;17582;49429;60308;64690;68057;71571	4.94E-01;6.43E-01;8.93E-01;1.03E+00;6.41E-01;6.93E-01;5.57E-01;4.11E-01;3.08E-01
SLN	-0.152847	0.733581	4	CTTCACTATTGTCTTGATTA;GAAGTTGAGAAACAGCTCCC;TGATTACGGTTATTCTTATG;GAAAATGGGGATAAACACCC	-0.52;-0.05;-0.03;-0.01	36350;49431;49943;50508	5.52E-01;4.95E-01;4.19E-01;7.42E-01	26934;27499;28012;41092	4.13E-01;5.02E-01;9.18E-01;1.10E+00
SLK	-0.466861	0.638223	5	TCAGAGTTGATATTAATACT;GCCGAGGCGGGCAGATCACG;GAGTATCAGCTAAAAACACG;CACCTGCACAAAATTCAATG;AGGATACGCAGAGTAATGAT	-3.51;-1.31;-0.02;0.5;1.99	2143;20055;50429;63887;76442	9.08E-01;5.64E-01;4.74E-01;3.92E-01;2.82E-02	1000;13555;27013;57387;75299	1.21E+00;7.64E-01;7.45E-01;4.08E-01;6.09E-02
SLA	-0.982143	0.853903	5	CCCCCCGATATTCCGCCGAG;GCCGAGGCGGGCAGATCACG;AGACGGGTAGTCACTTAGCA;ACTGGTACTACATTTCCCCG;TGTGTGGCCAGAGTTTACCA	-1.38;-1.31;-1.17;-1.17;0.11	19075;20055;22245;22276;54260	4.01E-01;5.64E-01;9.19E-01;1.61E+00;7.72E-01	23182;55166;55200;57387;58367	4.43E-01;9.18E-01;5.25E-01;4.08E-01;6.14E-01
PHYH	0.0475281	0.782563	4	GGATAATAACGTTCTAACCC;CAGATACTGCACTCTCCCCG;TCTCATCGTTTGCGCCTGGA;TTACAATTACCAGAATCTGG	-0.34;-0.14;0.0;0.67	41330;46901;51015;66944	6.65E-01;4.66E-01;4.09E-01;2.53E-01	10498;26234;30541;36112	4.56E-01;5.21E-01;8.28E-01;1.33E+00
GFY	-0.928015	0.62506	4	AAAATGCAACAGATGTACCC;TTCAGAAGCACCCTTCAGAG;GGTTAGTGTTTGAGGTCTCG;GGGGCTCAGTGAAGTCAAGT	-1.66;-1.57;-0.51;0.03	15661;16663;36368;52088	3.86E-01;7.67E-01;6.58E-01;6.89E-01	25354;41074;60779;61781	4.00E-01;4.29E-01;3.81E-01;3.92E-01
NOTCH4	-0.896106	0.557395	4	TGTGTCAGCCTGGCTATTCG;ACACCCCTCCATTAACACAT;GCTGCCATTGTATAGGCATG;GGAGGCCTCTGTGTCGACAG	-3.05;-0.43;-0.17;0.07	4881;38774;45943;53222	6.83E-01;4.26E-01;4.69E-01;6.52E-01	24220;31499;38668;72554	3.91E-01;4.57E-01;6.03E-01;1.13E-01
PHGR1	0.144095	0.810521	4	GGCCATCCTCCAGGTCACTG;CCACAGTGGCAGTGCCCCTG;CACCCCCCCACCATGGTCCA;GATGGCCATGCCCCCCACAG	-0.5;-0.07;0.13;1.02	36683;48859;54834;71890	5.59E-01;4.88E-01;3.82E-01;1.29E-01	5552;22608;28583;40759	6.39E-01;5.91E-01;8.97E-01;1.12E+00
MEAF6	0.3502	1.37563	5	GGAATCTCACTCTGTCACCC;ATGTATGGCAATATTATTCG;GCGGCTCTTCAGTAAATCCT;CCAATAGCAAAAATGATCGA;CGCAGATCCCGGACACCCGG	-1.53;-1.48;0.78;1.96;2.02	17134;17752;68813;76387;76485	3.91E-01;6.19E-01;1.06E+00;1.19E+00;2.70E-02	957;1055;8629;59690;60308	1.23E+00;2.75E+00;1.96E+00;3.93E-01;5.43E-01
AZIN1	-0.861269	0.608289	5	GGAAAGTAGATATCCAACAG;GAGAATCGCTTGAATCCGGG;AATGGCTTTAGTGCAAGAGT;ACTTGATGTCCAAATAATTG;TGCTCGATGTGTGTTTGACA	-1.95;-1.64;-0.59;-0.27;0.14	12985;15856;34305;43297;55225	3.95E-01;6.76E-01;5.69E-01;6.67E-01;7.34E-01	22217;34145;43137;61585;64457	4.31E-01;4.69E-01;4.70E-01;3.88E-01;3.99E-01
NOTCH1	-1.18694	0.713933	5	TTGACGTCGATCTCGCATCG;TCCTGCCAGAACACCCACGG;GCCGAGGCGGGCAGATCACG;TGCAGGTCAGTACTGTACCG;TCGCACGCCTCCTCGATCAG	-3.06;-1.81;-1.31;0.11;0.13	4853;14210;20055;54336;54724	6.16E-01;7.37E-01;1.02E+00;4.42E-01;7.54E-01	22718;23106;57387;63232;72591	4.37E-01;5.12E-01;5.64E-01;3.90E-01;1.40E-01
NOTCH2	-0.199481	0.70835	6	TGGAAGTACCTGTACCACTG;CTGTAAACCCTGAGGCACAT;CTGGGGACACACATCGACGA;TTGTTGATATAATCCCAGCA;TTGATGTCCATCTCACAACG;CATTGGTGGATACAGATGCG	-2.16;-0.32;-0.1;-0.08;0.32;1.14	11289;41826;48139;48749;59824;72895	4.00E-01;7.08E-01;5.85E-01;4.90E-01;4.25E-01;1.58E-01	4547;17618;28693;29303;35616;66153	5.84E-01;5.58E-01;5.96E-01;9.25E-01;1.18E+00;4.11E-01
AZIN2	-0.597537	0.84992	6	TCGGGAAGTCTTCATATGTG;ACTTGACAGCATAAAAGGGC;AAATGCGAAGAAGCACCATG;GGGGCGCTACTACGTGACCT;CTGCTGCTGCTGAGGCTGAG;GTCCAAGGCTGAGTTGATCA	-4.28;-0.03;0.0;0.18;0.26;0.27	225;50003;51354;56184;58315;58587	1.76E+00;1.01E+00;6.52E-01;5.04E-01;4.45E-01;7.27E-01	18855;19127;21258;26088;27439;77217	4.41E-01;5.31E-01;8.01E-01;1.07E+00;1.66E+00;7.55E-03
ZNF658	-1.68467	1.05485	5	CAGCATCAGAGGCCCCACTC;CAGCATCAGAGAATTCACAC;GCAGAGATGGAACTCTGTGG;CACATGAGAACTGACACAAG;ATATTGCATTACTAAACCTA	-2.96;-2.92;-2.28;-0.19;-0.08	5507;5816;10453;45643;48742	5.77E-01;1.35E+00;1.74E+00;6.06E-01;1.01E+00	28700;31799;66989;71615;71937	5.36E-01;4.62E-01;9.28E-01;5.60E-01;1.60E-01
ZNF655	-0.455256	0.48277	4	CCCAGAGCCTCAGTTTGTGC;TGAACACTTAAATCTAACAG;TAGGCAAATAACAATCAGCA;GGATTTATCAGACGCTTCAC	-1.17;-0.54;-0.33;0.22	22124;35758;41576;57192	3.80E-01;4.31E-01;5.43E-01;5.27E-01	20250;35866;41684;55318	3.75E-01;4.31E-01;5.41E-01;5.84E-01
TCTEX1D2	-0.765423	0.445861	4	GATACAGTCTTTAACCACAG;ATTTGACCGATACAAAATGG;CCGAGAACACCTATATTCTG;CATCGGAGTGTCCTTCTCGG	-3.03;-0.8;-0.24;1.02	5011;29319;43940;71841	6.74E-01;4.79E-01;5.00E-01;1.30E-01	5601;33502;48123;72430	6.36E-01;4.42E-01;4.40E-01;1.16E-01
TCTEX1D1	-0.0162748	0.745606	4	GAGATATCATCACGCTGACT;TTTGGCGAAAGGAAATTCAT;GATGACTAAAACCATTTCTG;CTCTCGCCTTACAGTTCAGA	-1.28;0.21;0.31;0.69	20457;56910;59580;67336	3.76E-01;6.43E-01;3.77E-01;2.43E-01	10106;17862;20532;56985	4.65E-01;7.24E-01;1.26E+00;5.33E-01
ZNF653	-0.146153	0.717738	4	TCAGGGTCTGAGTCGCTGAG;CCGTGAGAGCGTCGTAACCA;TACACCCAGACAGAGCCCGA;CCGGCCGCGACTCACGGAGT	-2.1;-0.2;0.78;0.94	11816;45194;68719;70935	4.30E-01;4.51E-01;5.02E-01;1.52E-01	6507;8723;32249;65626	5.88E-01;1.22E+00;7.73E-01;2.88E-01
ZNF652	-1.00975	0.659572	6	CCAGGGTATTTAACACTCGC;GGAATCTCACTCTGTCACCC;GCCGAGGCGGGCAGATCACG;AGAAAGTCAGCGTTACACAA;TGTTCTTAAGACAAGCAGTG;GGCTCATGTGCGGAAACACA	-3.48;-1.53;-1.31;-0.74;0.42;0.57	2256;17134;20055;30877;62123;65153	8.22E-01;5.69E-01;8.50E-01;8.63E-01;4.04E-01;4.50E-01	12289;15319;46565;57387;60308;75186	3.97E-01;6.14E-01;5.60E-01;5.18E-01;4.20E-01;7.70E-02
RAPGEF4	-1.25596	0.912556	6	GGATTTCAACCGGATCCTAA;GGAACGTGAGGTTCAATGAG;GGAATCTCACTCTGTCACCC;GCCGAGGCGGGCAGATCACG;ACTGCTCTCCCTGGTAACGA;GAAGATGGTGTTCTCAACCA	-2.72;-1.69;-1.53;-1.31;-0.24;-0.05	7338;15309;17134;20055;44029;49526	4.61E-01;6.15E-01;9.90E-01;1.43E+00;8.13E-01;1.16E+00	27916;33413;57387;60308;62133;70095	6.36E-01;5.35E-01;8.50E-01;5.69E-01;4.04E-01;2.60E-01
RAPGEF5	0.00273695	0.684931	4	AGTGCTCTGTTATATACACG;ATATTCGACCAGATGCCTCG;AAGACTTTACGTTTCCTACG;TCTTGTGCGTCTAACATCTG	-0.92;-0.25;0.3;0.88	26798;43845;59233;70246	4.12E-01;4.41E-01;3.76E-01;1.69E-01	7196;18209;33597;50644	5.57E-01;7.12E-01;7.33E-01;7.38E-01
RAPGEF6	-0.451344	0.535481	6	GAGAATCGCTTGAATCCGGG;CTAGAAATCGAGTCATAGCA;CAAGGCAGGCAGATCACCTG;CAAATGTAAACGTACCTGCA;CATCGGGAACTAGACCGGAG;GCTGATTCAGGACTGAAACG	-1.64;-1.35;-0.53;-0.41;0.5;0.72	15856;19465;35879;39162;63860;67869	4.08E-01;5.26E-01;5.12E-01;6.20E-01;3.97E-01;3.44E-01	9573;13582;38280;41563;57977;61585	4.16E-01;6.71E-01;5.05E-01;5.73E-01;4.50E-01;5.97E-01
N4BP2L2	-0.741032	0.72547	6	GGAATCTCACTCTGTCACCC;CCAGGCATCTCATCATGCAA;GCTATATATCTCATCGTCTG;CAAGGCAGGCAGATCACCTG;TGCTGATAATCACAATGTGA;GTGAAAAACATACGACTCTG	-1.53;-1.1;-0.87;-0.53;-0.31;-0.1	17134;23345;27884;35879;42170;47961	4.20E-01;4.89E-01;6.11E-01;7.01E-01;8.83E-01;1.25E+00	29481;35273;41563;49558;54097;60308	6.82E-01;5.63E-01;5.12E-01;4.87E-01;5.22E-01;6.52E-01
RAPGEF1	-0.966322	0.583376	5	AATGGTCTTAAAGTAGCGCA;GCCGAGGCGGGCAGATCACG;ATGTTGACTGTTACGCACAG;GCTCCCCCTGACAGACCGCG;TAGCAGCAAAGGGCGCGTAG	-3.22;-1.31;-0.86;0.18;0.38	3671;20055;28096;56285;61174	7.10E-01;5.64E-01;7.12E-01;4.19E-01;5.12E-01	16268;21157;49346;57387;73778	3.88E-01;5.43E-01;4.68E-01;4.08E-01;1.05E-01
RAPGEF2	-0.865867	0.745051	7	ACTGAAGCAGGCTTGAAACG;GCCGAGGCGGGCAGATCACG;TAGTGAATATTGATCCGGGG;GCTGGTGATATGGACCTGAG;CAAGGCAGGCAGATCACCTG;TCCTGCCTCAGCCTCCCGAG;CTCACCGAGTCCTGAACATG	-2.19;-1.31;-1.13;-0.83;-0.53;-0.4;0.34	11087;20055;22850;28759;35879;39519;60124	4.02E-01;5.02E-01;6.54E-01;7.82E-01;8.89E-01;1.22E+00;7.69E-01	17318;37923;41563;48683;54592;57387;66355	4.65E-01;7.59E-01;6.03E-01;5.53E-01;4.97E-01;5.23E-01;4.70E-01
RAPGEF3	-0.623831	0.500086	4	GCTGGAAGAACATGGCAAAG;GCAGCAGCTCCTCAAAGATG;CTCACCGATAGAGCCTAAGG;CTGGAAGGGATCTGTCAACG	-1.6;-0.63;-0.43;0.16	16313;33476;38661;55704	3.83E-01;4.42E-01;6.03E-01;5.72E-01	21738;38781;43966;61129	3.79E-01;4.26E-01;5.00E-01;4.11E-01
ZNF384	-1.02702	0.59359	5	TGGCCCCCGAGTGGATACGG;CGTTACCCAGAATATCACGG;CAAGGCAGGCAGATCACCTG;GGTAGCATCGACCCTAACCG;GCACATCCGTATACACTCAG	-3.45;-2.21;-0.53;-0.07;1.12	2411;10991;35879;48950;72779	8.63E-01;8.95E-01;5.43E-01;5.32E-01;1.35E-01	4663;28492;41563;66451;75031	6.29E-01;4.66E-01;4.79E-01;4.15E-01;6.87E-02
ZNF383	-1.14649	0.732844	6	AAGTTGTGAGCTCTTAGTAA;CAGCATCAGAGAATTCACAC;GCCGAGGCGGGCAGATCACG;GTTGGCAGAGAGCTTACAAG;AGCCACCTTGCAAAACAACT;TGTATAAGTCCCTCTGAACA	-3.54;-2.92;-1.31;-0.83;0.41;1.31	1990;5816;20055;28704;61813;74126	8.68E-01;1.21E+00;8.50E-01;9.50E-01;4.06E-01;1.14E-01	3316;15629;48738;57387;71615;75453	6.85E-01;6.06E-01;5.95E-01;5.18E-01;5.15E-01;6.78E-02
ZNF382	0.115136	0.790687	4	GGAGCTTATTCAGCATCAGA;TCTTACCCACAGATACGAAG;GATTACTTGGATGGACACTG;ATGAGAAAACACATATAGAG	-0.78;-0.18;0.59;0.82	29916;45848;65582;69413	4.47E-01;4.56E-01;4.29E-01;1.90E-01	8029;11860;31594;47526	5.25E-01;9.96E-01;7.94E-01;8.48E-01
POC1B	-0.34965	0.819676	14	ATTAGGACCAATAAGCGAGA;GCCGAGGCGGGCAGATCACG;CTGCCCGAGCAGTATTCTGT;TTCTACAAATCAGTTCACAG;CAAGGCAGGCAGATCACCTG;ATAGAAAGCAATGATAACAG;TACCTTGGAACGTATGACAC;CTTGTATCGACATACACACT;TCTCACGGTTCTGTCTCGTG;GCAATGATAACAGAGGTGGT;GATCCACCCGTGTTCCCACG;CCATGGTAGGTGATCTGATG;GATTAGGACCAATAAGCGAG;TATCTGTAAGCTCTAGCATG	-2.41;-1.31;-1.27;-0.96;-0.53;-0.46;-0.2;-0.0;0.0;0.29;0.36;0.41;0.47;0.72	9583;20055;20548;26002;35879;37971;45138;50824;51248;58917;60706;61771;63198;67793	5.07E-01;7.76E-01;6.41E-01;6.72E-01;8.02E-01;7.21E-01;7.64E-01;7.69E-01;6.66E-01;6.72E-01;5.98E-01;6.07E-01;7.37E-01;8.09E-01	9649;14244;15671;16736;18525;26445;26618;32304;39471;41563;51440;56894;57387;67856	5.10E-01;5.71E-01;6.01E-01;7.18E-01;8.73E-01;7.74E-01;9.91E-01;9.67E-01;8.80E-01;1.04E+00;8.15E-01;8.00E-01;1.13E+00;8.03E-01
RPL21P39	-1.50373	0.647798	1	GCACCCGATATATGTTCTCT	-1.5	17425	0.648	60017	0.111
RPL31P49	-0.809686	0.42332	1	CCGTTCTGCCATCAACGAAG	-0.81	29218	0.423	48224	0.206
KRTAP3-2	-0.188676	0.64254	5	GGACAGTTGTCACAGCAGAT;GGGGACACTGCAGCTGCGAG;TGGTGGTGGCAGGCCCAGTG;CCAGTAACCAAACTGTGTGT;ACAGCGGCAGGATTTGTCGG	-1.8;-0.45;-0.33;0.62;1.02	14333;38051;41436;65996;71882	3.89E-01;4.98E-01;4.80E-01;4.09E-01;1.62E-01	5560;11446;36006;39391;63109	5.74E-01;8.69E-01;5.41E-01;7.84E-01;4.44E-01
KRTAP3-3	-0.978813	0.611876	4	ACAGCGGCAGGATTTGTCAG;GGGGACACTGCAGCCTCGAG;GAGGCTGCAGTGTCCCCACC;CCAGTAACCAAACTGTGTGT	-1.89;-1.82;-0.83;0.62	13508;14100;28826;65996	4.06E-01;8.76E-01;8.88E-01;2.78E-01	11446;48616;63342;63934	4.37E-01;4.85E-01;4.00E-01;3.33E-01
KRTAP3-1	-0.240048	0.679752	4	TTGTTGAGCAGCCAGCAAGT;TTTATCAAATGAGCAGAAGG;TTTGATAAAAGCTGCCGCTG;TAGGTATCAGGCTTGCAGCA	-0.54;-0.26;-0.09;-0.08	35835;43560;48412;48697	5.42E-01;4.40E-01;4.36E-01;8.06E-01	28745;29030;33882;41607	4.33E-01;4.82E-01;7.25E-01;1.08E+00
SCHLAP1	-2.96438	1.1509	1	TCTTCAAAGCCACATCATCG	-2.96	5471	1.15	71979	0.0318
SNRPD3	-0.123368	0.778528	5	AAAGTACTGCATGAGGCCGA;GCCGAGGCGGGCAGATCACG;ACACCGGTGAGGTATATCGG;CACATACAGAGATGGCCGAG;CTGGAGCAGGTATACATCCG	-1.31;-1.31;-0.72;0.99;1.74	20014;20055;31172;71520;75900	4.08E-01;5.64E-01;6.33E-01;5.56E-01;4.36E-02	1542;5922;46269;57387;57428	1.04E+00;1.34E+00;4.61E-01;4.08E-01;6.49E-01
SNRPD2	-0.272834	0.552253	4	GCGGCAGTTGATGAGCACTT;TGGAGAACGTGAAGGAGATG;TGTGAGCACAGAGAGTGGAC;ACCCAGCACTCACCTATCGA	-0.84;-0.54;-0.07;0.36	28632;35712;48810;60701	4.31E-01;4.31E-01;4.31E-01;4.23E-01	16741;28633;41730;48810	3.80E-01;4.87E-01;5.40E-01;8.02E-01
SNRPD1	-2.31056	1.70794	5	CTGGAAACGCTGAGTATTCG;TCCACAAGTAGTGTATCCAG;CAGGTCCATGGAACAATCAC;GTAACCATTGAATTGAAGAA;CAAGGCAGGCAGATCACCTG	-3.95;-2.64;-2.48;-1.95;-0.53	699;7937;9063;12970;35879	1.36E+00;1.12E+00;1.90E+00;2.48E+00;1.67E+00	41563;64477;68371;69510;76743	9.08E-01;1.49E+00;1.03E+00;4.78E-01;1.97E-02
NMBR	-0.437286	0.504748	4	GGAGACCACCCAGATACCCA;TCATCCAGCTCACTTCCGTG;AGAGGGACGGGATCACACAG;TAAATGCTAATAATAGCAAG	-1.94;-0.67;-0.4;1.25	13088;32520;39600;73784	4.11E-01;4.49E-01;5.83E-01;8.40E-02	3658;37842;44922;64354	7.87E-01;4.26E-01;4.84E-01;3.22E-01
RBMY1HP	-0.616998	0.781132	15	GAGTATGCTCCACCATCTAG;CGGGATGAAAGTTATTCTAG;GAAGATATTGTCGCTCTGCG;ATCCAAGTTGCCAAGAAACG;TCTGCAAGAGGAAGCAGTGG;TGATTATGGTCATTCTCGTC;TATGCATAGCCTCTAGATGG;CGCATGTCAACAAGACATGA;GATATTGTCGCTCTGCGTGG;GACGAGAATGACCATAATCA;GAAGCAGTGGAGGAACAAGA;TGACATGCGATCATTTCTCC;TATCCATGGCCTCTAGATGG;ATGGTTATGCAACTAACGAT;GATGGTTATGCAACTAACGA	-3.45;-2.91;-2.75;-2.59;-1.41;-0.68;-0.45;-0.39;0.09;0.15;0.36;0.74;0.92;1.4;1.72	2422;5891;7105;8293;18594;32082;38132;39853;53857;55317;60740;68081;70756;74631;75837	5.22E-01;6.63E-01;9.56E-01;1.29E+00;8.13E-01;6.88E-01;7.01E-01;6.97E-01;8.18E-01;7.04E-01;6.90E-01;7.66E-01;6.16E-01;4.89E-01;1.36E-01	1605;2811;6686;9361;16702;22125;23585;37589;39310;45360;58848;69142;70335;71561;75020	6.35E-01;1.07E+00;1.00E+00;1.15E+00;9.08E-01;8.80E-01;1.07E+00;7.22E-01;7.97E-01;7.59E-01;6.55E-01;8.43E-01;5.97E-01;4.24E-01;2.07E-01
IFT43	-1.10251	0.683054	5	CAGGCCGAGAATCACCTCAA;GGAATCTCACTCTGTCACCC;CTGGGCAGGTGATTCCGTGA;AAACGCATCACAGAGATTTG;TCTGATTTAACCTACCTGGG	-3.59;-1.53;-0.39;-0.18;0.18	1750;17134;39721;45825;56195	9.87E-01;6.36E-01;4.95E-01;6.02E-01;6.96E-01	21247;31617;37721;60308;75693	4.20E-01;4.62E-01;5.17E-01;3.91E-01;4.96E-02
IFT46	-1.77926	1.31583	5	ACCAGAGTGAGAGCACCGTA;ATCCCAAAGCCATTGACACG;GCCGAGGCGGGCAGATCACG;TGGTCCAGGTCAATCAACTG;CCGTTGAGGTGTCAACTGTG	-3.27;-2.27;-1.31;-1.09;-0.96	3417;10556;20055;23557;25930	7.35E-01;9.22E-01;1.02E+00;1.53E+00;2.38E+00	51512;53885;57387;66886;74025	1.38E+00;8.66E-01;5.64E-01;4.21E-01;9.80E-02
GLDN	-1.39798	0.926811	5	GCATGTCATGGCTCTCGGCG;CGGCAGCCAAGCATGTTCAA;GCCGAGGCGGGCAGATCACG;GGCAACCCGCCGGCTCCCGG;AGGGAAATGAGGGCCCACCA	-3.45;-1.54;-1.31;-0.35;-0.35	2404;17037;20055;40958;41088	8.64E-01;6.39E-01;1.02E+00;7.34E-01;1.38E+00	36354;36484;57387;60405;75038	7.31E-01;4.84E-01;5.64E-01;3.90E-01;6.85E-02
GLDC	-1.10438	0.791966	8	TGGCAGCCATATTCGCCAAG;GGAGACAGCCCAAATATCCT;GGAATCTCACTCTGTCACCC;GCCGAGGCGGGCAGATCACG;CAAGGCAGGCAGATCACCTG;AAACCTGTTGAACACTTGAT;TCATTCCGAAATCAGCACAT;AGGGTAACTTCAGCTCAGTG	-3.09;-2.39;-1.53;-1.31;-0.53;-0.46;-0.18;0.66	4580;9703;17134;20055;35879;37937;45685;66712	5.10E-01;7.06E-01;7.60E-01;1.02E+00;7.33E-01;9.97E-01;1.09E+00;5.18E-01	10730;31757;39505;41563;57387;60308;67733;72860	4.09E-01;7.02E-01;6.78E-01;5.73E-01;6.63E-01;5.15E-01;4.06E-01;2.12E-01
QPCT	-0.329066	0.575953	4	GACCCATAGAGAGAATCTTG;GCACCAGTATCTCTGAAATG;CGTGCCATGTGCAATGATGT;TCTTGAGTCAGACACCCTAT	-1.53;-1.32;0.35;1.18	17121;19861;60459;73285	3.79E-01;6.61E-01;3.79E-01;9.58E-02	4157;16983;57581;60321	7.40E-01;7.55E-01;3.75E-01;4.34E-01
PC	-0.867444	0.970625	8	GGTCCATGCTCAGATCCACG;CATCTCATACACGGGCGACG;GCTGTTTGTGCCGCCCAACG;CAATGCCATCACCCGCATTG;CAGAGTAGATGGCTACGGTG;CAATCTCTAAGGTCCCGTTG;TCGGACGCGGAACTCCGCAA;CCACAGCCCGAGTAGAACTG	-1.77;-1.11;-1.02;-0.96;-0.91;-0.79;-0.37;-0.01	14534;23230;24934;25960;27093;29528;40399;50646	4.55E-01;5.28E-01;5.72E-01;7.63E-01;1.09E+00;1.48E+00;1.40E+00;1.48E+00	26796;37043;47914;50349;51482;52508;54212;62908	8.49E-01;8.89E-01;9.71E-01;7.27E-01;5.62E-01;5.50E-01;7.04E-01;7.22E-01
LINC01837	-0.533336	0.334131	1	CAAGGCAGGCAGATCACCTG	-0.53	35879	0.334	41563	0.27
LINC01835	-0.320525	0.523283	4	CTTCCTGACATCAACTAACC;AACCAGGCGACATCCTGGAT;CAAAGGAGATACTCACATGT;CCAATGCTGATAATTCTTTG	-1.37;-0.56;0.26;0.38	19225;35293;58331;61075	3.75E-01;4.33E-01;3.75E-01;4.12E-01	16367;19111;42149;58217	3.82E-01;6.83E-01;5.32E-01;4.96E-01
LINC01830	-0.466652	0.443852	2	CAAGGCAGGCAGATCACCTG;TCCTGCCTCAGCCTCCCGAG	-0.53;-0.4	35879;39519	3.03E-01;5.84E-01	37923;41563	3.01E-01;5.41E-01
DHRS11	0.0646229	0.734267	4	TTGATAGGTCACATCTGTAG;AGGAGCGGAATGTGGACGAT;CCGCACTGTGGGCAACATCG;TCACAGACAGGGGTAACACT	-0.86;-0.06;0.09;1.09	28114;49093;53860;72491	4.26E-01;4.91E-01;3.87E-01;1.15E-01	4951;23582;28349;49328	6.78E-01;5.70E-01;9.05E-01;7.84E-01
DHRS12	-0.534084	0.550876	4	GCCCTTGAAATCGCCAAGCG;TCTGGACCTCCAAGTCATGA;CTGAACCAACATTCCTCCTG;GGTGTGTACATTCTCACGAC	-1.46;-1.19;-0.86;1.38	17973;21844;28153;74527	3.76E-01;6.09E-01;9.13E-01;6.66E-02	2915;49289;55598;59469	8.72E-01;4.93E-01;3.79E-01;4.59E-01
DHRS13	-1.17374	0.668091	4	CACCCGTGACCACGGCCGTG;GGCATGTGCCCCTAGCCGCG;TGCATAGCAGGTGACGCCAG;TGGATGAGGATGTCCAACCG	-2.86;-2.77;0.35;0.58	6269;6953;60568;65324	6.00E-01;1.40E+00;3.80E-01;2.96E-01	12118;16874;70480;71180	4.25E-01;7.59E-01;5.67E-01;1.46E-01
GPR89B	-2.30376	2.69748	10	TCACTCCAATCACACCAACC;GGATCAGCAGAATTACACAC;AGCTGATCTATATGCTACCA;TGTGATTGGAGTGACTCTCA;AATACTCCAAAACCTTCAAG;GCCGAGGCGGGCAGATCACG;AAAGATGATGAGCTCAAACA;CGGAGAACAATGTTCCAGAA;GAGAACAATGTTCCAGAAGG;TCCTGCCTCAGCCTCCCGAG	-4.46;-4.04;-3.81;-3.15;-3.14;-1.31;-1.05;-0.9;-0.77;-0.4	106;508;1027;4175;4239;20055;24284;27178;30079;39519	1.87E+00;2.74E+00;3.59E+00;2.90E+00;4.03E+00;1.72E+00;1.94E+00;2.36E+00;2.91E+00;2.92E+00	37923;47363;50264;53158;57387;73203;73271;76413;76934;77336	1.94E+00;2.06E+00;1.67E+00;1.35E+00;1.18E+00;2.87E+00;1.90E+00;2.15E+00;1.21E+00;5.89E-03
GPR89A	-2.30376	2.69748	10	TCACTCCAATCACACCAACC;GGATCAGCAGAATTACACAC;AGCTGATCTATATGCTACCA;TGTGATTGGAGTGACTCTCA;AATACTCCAAAACCTTCAAG;GCCGAGGCGGGCAGATCACG;AAAGATGATGAGCTCAAACA;CGGAGAACAATGTTCCAGAA;GAGAACAATGTTCCAGAAGG;TCCTGCCTCAGCCTCCCGAG	-4.46;-4.04;-3.81;-3.15;-3.14;-1.31;-1.05;-0.9;-0.77;-0.4	106;508;1027;4175;4239;20055;24284;27178;30079;39519	1.87E+00;2.74E+00;3.59E+00;2.90E+00;4.03E+00;1.72E+00;1.94E+00;2.36E+00;2.91E+00;2.92E+00	37923;47363;50264;53158;57387;73203;73271;76413;76934;77336	1.94E+00;2.06E+00;1.67E+00;1.35E+00;1.18E+00;2.87E+00;1.90E+00;2.15E+00;1.21E+00;5.89E-03
LOC107984271	-1.02953	0.684708	4	GTCTTCACAAAATCAGCTCA;ACGACATGGTCCCTTACTGA;GCCGAGGCGGGCAGATCACG;TGTTGAGAATGACAAACTAG	-1.92;-1.31;-1.31;0.42	13209;20054;20055;62045	4.10E-01;6.56E-01;1.29E+00;3.85E-01	15397;57387;57389;64233	3.88E-01;6.56E-01;3.75E-01;3.25E-01
MAP1LC3B2	-0.346243	0.539284	5	TGAGCTCACTCATGTTGACA;GATGCTGCTCTCGAATAAGT;GGTGATAATAGAACGATACA;CGGAGAAGACCTTCAAGCAG;GTGATAATAGAACGATACAA	-1.63;-0.96;-0.51;0.41;0.97	15993;25957;36411;61722;71306	3.88E-01;4.81E-01;5.35E-01;3.88E-01;1.79E-01	6136;15720;41031;51485;61449	5.45E-01;6.81E-01;4.83E-01;4.85E-01;5.02E-01
LGMN	-0.250679	0.663427	5	GGAGTCCCGAAGGACTACAC;GTTCGTCAGGAATCCCATTG;CAAGGCAGGCAGATCACCTG;TGCCGGATAACATCAATGGT;TGTTTCCATACTGCATGACG	-2.47;-0.99;-0.53;0.25;2.5	9087;25338;35879;57874;76960	4.48E-01;4.87E-01;5.43E-01;4.04E-01;1.35E-02	482;19568;41563;52104;68345	1.52E+00;5.74E-01;4.79E-01;4.75E-01;2.71E-01
NBDY	-1.74073	0.769963	2	CAGTTTCAGCATCAGGCAAG;GCTGCAGGATTCAATAAACT	-2.97;-0.52	5453;36351	8.83E-01;6.57E-01	41091;71988	3.03E-01;6.34E-02
CAPS2	-0.758893	0.634813	9	GGAGAAAATATCTGGTTAGG;AGTCTGTGGCCATTATACAC;CAAGACATGCCATTACGGCT;AGGCTTCCCAAATCAAGTCG;CAAGGCAGGCAGATCACCTG;CAACATAAAAATCACCAAGT;TGAGTATATGGAGTTTGACA;TTGATGGTAGGATCGTATCA;GAAGCCCACAACGAATGGCG	-2.53;-2.36;-1.23;-0.64;-0.53;-0.11;-0.1;0.12;0.53	8759;9923;21247;33200;35879;47881;48201;54698;64346	4.09E-01;6.45E-01;5.96E-01;5.87E-01;6.51E-01;5.83E-01;7.31E-01;7.86E-01;7.24E-01	13096;22744;29241;29561;41563;44242;56195;67519;68689	4.61E-01;5.65E-01;5.80E-01;6.17E-01;5.87E-01;6.38E-01;5.42E-01;4.14E-01;4.69E-01
EHMT1	-1.23602	1.06259	7	TTCGGCTGCTTCCATCAACG;GGGCCGGTGCACAAACAGCG;GGAATCTCACTCTGTCACCC;GCCGAGGCGGGCAGATCACG;ACTTATACGACTCAGAACCT;CAAGGCAGGCAGATCACCTG;CAACACACTAACTCGGATAG	-2.23;-1.87;-1.53;-1.31;-1.23;-0.53;0.04	10825;13687;17134;20055;21199;35879;52482	4.02E-01;6.05E-01;8.56E-01;1.19E+00;1.77E+00;1.43E+00;1.18E+00	24960;41563;56243;57387;60308;63755;66617	6.60E-01;8.89E-01;1.12E+00;7.37E-01;5.31E-01;4.14E-01;4.58E-01
EHMT2	-2.88601	2.18938	4	CAAGAGGTGACCATCCCCCG;CTCCAGGTGGTTGTTCACCA;CGGACAGGTACAACTGCCGA;CTCTCCGTCCACACTCTCAG	-4.06;-3.29;-2.27;-1.93	478;3268;10567;13180	1.62E+00;2.01E+00;2.06E+00;3.08E+00	64262;66875;74174;76964	1.79E+00;1.08E+00;8.29E-01;1.07E-02
ADIPOR2	-1.40972	1.13294	5	ACAGGAAGAATACACAACCT;CTCATGATGTACTACCAGAC;GCCGAGGCGGGCAGATCACG;AGTCTACTGCCACTCAGAGG;ATGATGGGCTTGTAAGAGAG	-2.31;-1.62;-1.31;-0.96;-0.85	10233;16047;20055;26079;28403	4.26E-01;6.70E-01;1.02E+00;1.37E+00;2.18E+00	49039;51363;57387;61395;67209	1.24E+00;7.75E-01;5.64E-01;3.88E-01;3.08E-01
ADIPOR1	0.0585659	0.762973	4	TTTCTCTGAATGACAATAGA;GACAACGACTATCTGCTACA;CCAGGACACAGACGATGGAG;GTATATGTTCTAGGTCTGGG	-1.37;-0.28;0.67;1.21	19175;42893;67012;73537	3.75E-01;4.36E-01;4.57E-01;8.99E-02	3905;10430;34549;58268	7.63E-01;1.09E+00;7.06E-01;4.94E-01
NBPF26	-0.637036	0.5249	8	GCTGCTGTAAGACTTGTACG;GAGGCTGGTTGGAGTCACAA;GTGGGATCAAGTGAAAAAGG;TTAAAGGAGAAGTTACGGGA;AACTAAAAAGGACCAAGAAG;CAAGAAGAGGAAGAAGACCA;TCTAGAAAATGACGAAGATG;AGAGCAGCTCAAGCAAGCTG	-2.85;-2.0;-1.08;-0.74;-0.0;0.27;0.4;0.9	6360;12554;23808;30863;50779;58337;61663;70438	4.43E-01;5.94E-01;5.86E-01;6.36E-01;5.57E-01;5.07E-01;4.80E-01;3.29E-01	7004;15779;19105;26663;46579;53632;64876;71084	4.29E-01;5.28E-01;6.90E-01;7.40E-01;5.54E-01;5.35E-01;4.25E-01;2.98E-01
NBPF20	-0.83038	0.693963	11	TACGAGGCCAACATTTCAGG;GCTGCTGTAAGACTGGTACG;CCTACTTTCCAGGCTCAGCA;AAGTCACCTGGGGCATGGTG;TGTTTGTTCTCTGCCAACTG;GTGGGATCAAGTGAAAAAGG;AACTAAAAAGGACCAAGAAG;AGTGAAAAAGGAGGACCAAG;CAAGAAGAGGAAGAAGACCA;ATGGCTATTTGAATAAGTGA;AGAGCAGCTCAAGCAAGCTG	-2.87;-2.71;-1.79;-1.64;-1.29;-1.08;-0.0;0.25;0.27;0.83;0.9	6171;7372;14420;15847;20277;23808;50779;58051;58337;69523;70438	4.18E-01;6.93E-01;6.88E-01;9.34E-01;1.04E+00;1.21E+00;6.17E-01;5.88E-01;5.83E-01;4.17E-01;4.53E-01	7004;7919;19105;19391;26663;53632;57165;61595;63022;70064;71268	4.14E-01;6.62E-01;5.90E-01;7.63E-01;7.50E-01;8.54E-01;7.32E-01;6.45E-01;5.25E-01;4.14E-01;3.97E-01
MARK4	-0.241336	0.652033	7	GCCGAGGCGGGCAGATCACG;CCCTCGACTCCCACTCCCCG;CAAGGCAGGCAGATCACCTG;TCCTGCCTCAGCCTCCCGAG;TACTCACCTCCCGACCAGTG;TCATGCGGCCATGCGACACG;AAAGACAAATGGATCAACAT	-1.31;-1.2;-0.53;-0.4;-0.1;0.5;1.36	20055;21765;35879;39519;47949;63751;74402	5.23E-01;4.97E-01;5.39E-01;5.55E-01;5.57E-01;4.14E-01;1.22E-01	3040;13691;29493;37923;41563;55677;57387	6.65E-01;6.05E-01;5.46E-01;5.73E-01;6.97E-01;5.66E-01;9.11E-01
STOX1	-0.584726	0.599587	5	CCGCATAGTCTGCCATCACG;GCCGAGGCGGGCAGATCACG;TTCCTCGGTGAGACAAACCC;AGCTCAGATTGTAGTAACGC;GTTTGGTGCTCTCACAAATG	-1.32;-1.31;-0.11;-0.09;-0.09	19846;20055;47649;48347;48410	4.07E-01;5.64E-01;4.62E-01;5.45E-01;1.02E+00	29032;29095;29793;57387;57596	5.43E-01;4.64E-01;6.66E-01;4.08E-01;6.43E-01
MARK1	-1.14339	0.70565	5	AGTCATGGAATACGCGAGTG;GCCGAGGCGGGCAGATCACG;CAATGCTACGTATCGATCTG;GTAATGGAGTTTCTACACCG;AAGACCTCAGGCTAACAGTG	-3.77;-1.31;-1.0;-0.16;0.52	1122;20055;25261;46365;64184	1.17E+00;5.64E-01;8.02E-01;5.89E-01;4.08E-01	13258;31077;52181;57387;76320	3.94E-01;4.61E-01;4.87E-01;4.08E-01;3.17E-02
MARK2	-1.22744	0.850444	5	GTAACAACGCAGAAAATAAG;TGATGAACTAAAGCCTTACG;CAAAAAATATGATGGACCCG;CAAGGCAGGCAGATCACCTG;AGAGGTATTTGATTACCTAG	-2.61;-1.68;-0.95;-0.53;-0.37	8181;15464;26211;35879;40393	4.71E-01;6.90E-01;7.70E-01;9.08E-01;1.41E+00	37049;41563;51231;61978;69263	7.52E-01;5.43E-01;4.79E-01;3.88E-01;2.42E-01
[truncated: 22,601 more rows]
